# Supplementary material
Source: PubMed Central journal article supplement (PMC5483893)
Supplement: jm7b00475_si_001.pdf [file jm7b00475_si_001.pdf]

## Supporting Information

### Multi-targeted Imidazoles: Potential Therapeutic Leads for Alzheimer's and Other Neurodegenerative Diseases

Anne-Sophie Cornec,<sup>a</sup> Ludovica Monti,<sup>b</sup> Jane Kovalevich,<sup>c</sup> Vishruti Makani,<sup>c</sup> Michael J. James,<sup>c</sup> Krishna G. Vijayendran,<sup>a</sup> Killian Oukoloff,<sup>b</sup> Yuemang Yao,<sup>c</sup> Virginia M.-Y. Lee,<sup>c</sup> John Q. Trojanowski,<sup>c</sup> Amos B. Smith III,<sup>a</sup> Kurt R. Brunden,<sup>c,\*</sup> and Carlo Ballatore<sup>b,\*</sup>

<sup>a</sup>*Department of Chemistry, School of Arts and Sciences, University of Pennsylvania, 231 South 34th St., Philadelphia, PA 19104-6323;* <sup>b</sup>*Skaggs School of Pharmacy and Pharmaceutical Sciences, University of California, San Diego, 9500 Gilman Drive, La Jolla, CA 92093 ;* <sup>c</sup>*Center for Neurodegenerative Disease Research, Institute on Aging, University of Pennsylvania, 3600 Spruce Street, Philadelphia, PA 19104-6323*

**S2.** Details about docking studies.

**S3–8.** X-ray report for compound **98**.

**S9–150.** NMR spectra of test compounds.

**S151.** Supplemental Figure 1: Analysis of Table 2 compounds for their ability to reduce multiple COX and 5-LOX products.

**S152.** Supplemental Figure 2: Concentration-response relationship of compounds **64** and **70** in the HEK293 acetylated  $\alpha$ -tubulin assay.

The structure of COX-1 was prepared from the X-ray structure available in the Protein Data Bank database (PDB code: 3KK6). Using Autodock 4.2, water molecules, ligand and hydrogens were removed, while polar hydrogens and Gasteiger charges were added. The structure was converted in .pdbqt format.

Compounds were built and minimized with the MMFF94 force field using Chem3D (CambridgeSoft), saved in .mol2 format and converted in .pdbqt format using Autodock 4.2. Autodock Vina software was used for docking calculation.<sup>1</sup> In the configuration files we set a grid of 20 (x), 30 (y), 35 (z) and centered at -32.085 (x), 43.871 (y) and -5.222 (z) corresponding to the active site. Docking results were analyzed and docking poses were selected following the conformation and binding affinity results.

---

<sup>1</sup> Improving the speed and accuracy of docking with a new scoring function, efficient optimization, and multithreading Trott, Oleg; Olson, Arthur J. *Journal of Computational Chemistry*, 31(2), 455-461

### X-ray Structure Determination of 1436 (compound 98) - CCDC 1529316

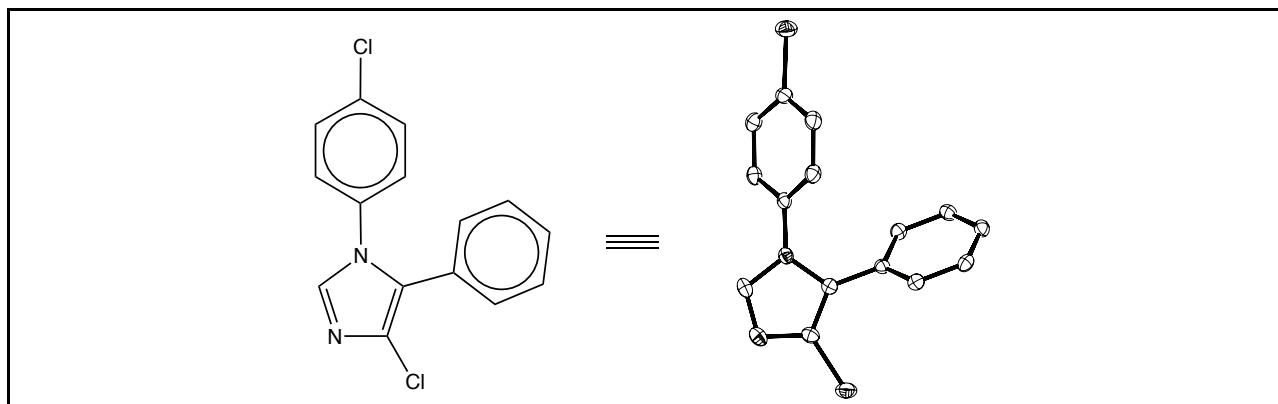

Compound 1436x,  $C_{15}H_{10}Cl_2N_2$ , crystallizes in the orthorhombic space group  $P2_12_12_1$  (systematic absences  $h00$ :  $h=\text{odd}$ ,  $0k0$ :  $k=\text{odd}$  and  $00l$ :  $l=\text{odd}$ ) with  $a=8.0987(4)\text{\AA}$ ,  $b=9.6131(4)\text{\AA}$ ,  $c=17.2587(8)\text{\AA}$ ,  $V=1343.65(11)\text{\AA}^3$ ,  $Z=4$ , and  $d_{\text{calc}}=1.429\text{ g/cm}^3$ . X-ray intensity data were collected on a Bruker APEXII [1] CCD area detector employing graphite-monochromated Mo-K $\alpha$  radiation ( $\lambda=0.71073\text{\AA}$ ) at a temperature of 100K. Preliminary indexing was performed from a series of thirty-six  $0.5^\circ$  rotation frames with exposures of 10 seconds. A total of 4191 frames were collected with a crystal to detector distance of 59.9 mm, rotation widths of  $0.5^\circ$  and exposures of 10 seconds:

| scan type | $2\theta$ | $\omega$ | $\phi$ | $\chi$ | Frames |
|-----------|-----------|----------|--------|--------|--------|
| $\phi$    | 32.00     | 44.52    | 349.55 | -24.38 | 739    |
| $\phi$    | -28.00    | 348.53   | 335.02 | -55.24 | 669    |
| $\omega$  | 37.00     | 1.45     | 201.14 | -31.86 | 308    |
| $\omega$  | 37.00     | 335.50   | 316.23 | -20.60 | 350    |
| $\phi$    | 39.50     | 166.34   | 331.87 | -58.65 | 739    |
| $\phi$    | -35.50    | 197.88   | 22.47  | 48.96  | 739    |
| $\omega$  | 39.50     | 123.67   | 224.27 | -99.82 | 184    |
| $\omega$  | 39.50     | 359.79   | 317.07 | 99.72  | 72     |
| $\omega$  | -30.50    | 311.87   | 203.97 | -93.68 | 124    |
| $\omega$  | 37.00     | 324.24   | 181.66 | 91.29  | 139    |
| $\omega$  | -38.00    | 306.44   | 63.99  | -90.90 | 128    |

Rotation frames were integrated using SAINT [2], producing a listing of unaveraged  $F^2$  and  $\sigma(F^2)$  values. A total of 34619 reflections were measured over the ranges  $4.72 \leq 2\theta \leq 54.956^\circ$ ,  $-10 \leq h \leq 10$ ,  $-12 \leq k \leq 12$ ,  $-22 \leq l \leq 22$  yielding 3093 unique reflections ( $R_{\text{int}} = 0.0167$ ). The intensity data were corrected for

Lorentz and polarization effects and for absorption using SADABS [3] (minimum and maximum transmission 0.7019, 0.7456). The structure was solved by direct methods - SHELXS-97 [4]. Refinement was by full-matrix least squares based on  $F^2$  using SHELXL-2014 [5]. All reflections were used during refinement. The weighting scheme used was  $w=1/[\sigma^2(F_o^2) + (0.0288P)^2 + 0.3254P]$  where  $P = (F_o^2 + 2F_c^2)/3$ . Non-hydrogen atoms were refined anisotropically and hydrogen atoms were refined using a riding model. Refinement converged to  $R1=0.0197$  and  $wR2=0.0539$  for 3020 observed reflections for which  $F > 4\sigma(F)$  and  $R1=0.0204$  and  $wR2=0.0546$  and  $GOF = 1.072$  for all 3093 unique, non-zero reflections and 172 variables. The maximum  $\Delta/\sigma$  in the final cycle of least squares was 0.001 and the two most prominent peaks in the final difference Fourier were  $+0.21$  and  $-0.15 \text{ e}/\text{\AA}^3$ .

Table 1. lists cell information, data collection parameters, and refinement data. Final positional and equivalent isotropic thermal parameters are given in Tables 2. and 3. Anisotropic thermal parameters are in Table 4. Tables 5. and 6. list bond distances and bond angles. Figure 1. is an ORTEP representation of the molecule with 50% probability thermal ellipsoids displayed.

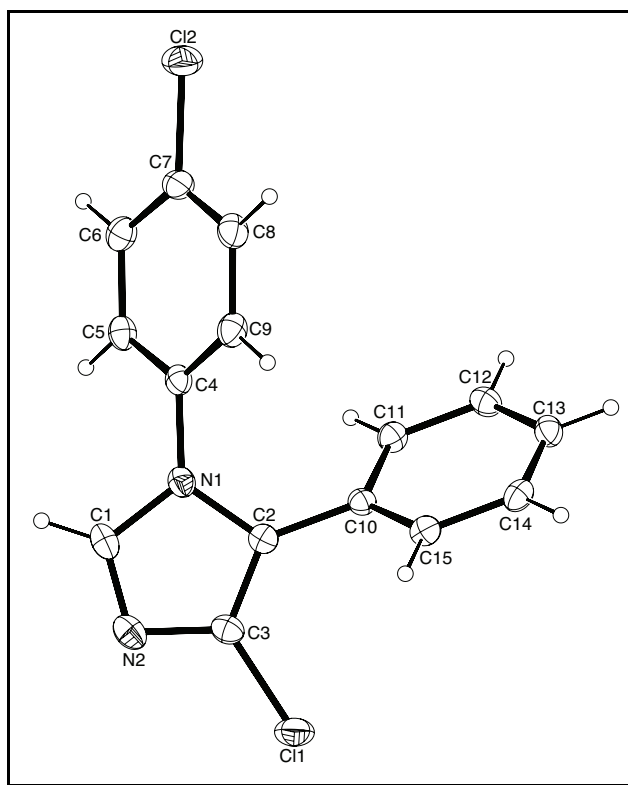

Figure 1. ORTEP drawing of the title compound with 50% thermal ellipsoids.

**Table 1. Summary of Structure Determination of Compound 1436**

|                                   |                                                                |
|-----------------------------------|----------------------------------------------------------------|
| Empirical formula                 | C <sub>15</sub> H <sub>10</sub> Cl <sub>2</sub> N <sub>2</sub> |
| Formula weight                    | 289.15                                                         |
| Temperature/K                     | 100                                                            |
| Crystal system                    | orthorhombic                                                   |
| Space group                       | P2 <sub>1</sub> 2 <sub>1</sub> 2 <sub>1</sub>                  |
| a                                 | 8.0987(4)Å                                                     |
| b                                 | 9.6131(4)Å                                                     |
| c                                 | 17.2587(8)Å                                                    |
| Volume                            | 1343.65(11)Å <sup>3</sup>                                      |
| Z                                 | 4                                                              |
| d <sub>calc</sub>                 | 1.429 g/cm <sup>3</sup>                                        |
| μ                                 | 0.469 mm <sup>-1</sup>                                         |
| F(000)                            | 592.0                                                          |
| Crystal size, mm                  | 0.38 × 0.25 × 0.13                                             |
| 2θ range for data collection      | 4.72 - 54.956°                                                 |
| Index ranges                      | -10 ≤ h ≤ 10, -12 ≤ k ≤ 12, -22 ≤ l ≤ 22                       |
| Reflections collected             | 34619                                                          |
| Independent reflections           | 3093[R(int) = 0.0167]                                          |
| Data/restraints/parameters        | 3093/0/172                                                     |
| Goodness-of-fit on F <sup>2</sup> | 1.072                                                          |
| Final R indexes [I ≥ 2σ (I)]      | R <sub>1</sub> = 0.0197, wR <sub>2</sub> = 0.0539              |
| Final R indexes [all data]        | R <sub>1</sub> = 0.0204, wR <sub>2</sub> = 0.0546              |
| Largest diff. peak/hole           | 0.21/-0.15 eÅ <sup>-3</sup>                                    |
| Flack parameter                   | 0.019(7)                                                       |

**Table 2 . Refined Positional Parameters for Compound 1436**

| Atom | x           | y           | z           | U(eq)       |
|------|-------------|-------------|-------------|-------------|
| C11  | 0.09107(5)  | 0.70615(4)  | 0.33214(2)  | 0.02712(10) |
| Cl2  | 1.09986(5)  | 0.20840(5)  | 0.40390(2)  | 0.03140(11) |
| N1   | 0.47760(16) | 0.52924(13) | 0.41620(7)  | 0.0174(3)   |
| N2   | 0.27362(18) | 0.66304(14) | 0.46030(8)  | 0.0228(3)   |
| C1   | 0.4113(2)   | 0.59712(16) | 0.47801(9)  | 0.0211(3)   |
| C2   | 0.37380(18) | 0.55263(15) | 0.35335(8)  | 0.0169(3)   |
| C3   | 0.25187(19) | 0.63474(16) | 0.38344(9)  | 0.0196(3)   |
| C4   | 0.62683(19) | 0.44939(15) | 0.41620(8)  | 0.0170(3)   |
| C5   | 0.7695(2)   | 0.50647(16) | 0.44722(9)  | 0.0192(3)   |
| C6   | 0.9153(2)   | 0.43018(16) | 0.44545(9)  | 0.0213(3)   |
| C7   | 0.9144(2)   | 0.29927(16) | 0.41118(9)  | 0.0216(3)   |
| C8   | 0.7721(2)   | 0.24107(17) | 0.38158(10) | 0.0241(3)   |
| C9   | 0.6256(2)   | 0.31601(16) | 0.38482(9)  | 0.0214(3)   |
| C10  | 0.40238(19) | 0.49792(14) | 0.27482(8)  | 0.0159(3)   |
| C11  | 0.55152(18) | 0.52238(16) | 0.23666(9)  | 0.0183(3)   |
| C12  | 0.57762(19) | 0.46838(15) | 0.16287(8)  | 0.0196(3)   |
| C13  | 0.4549(2)   | 0.39032(16) | 0.12695(9)  | 0.0197(3)   |
| C14  | 0.30663(19) | 0.36612(15) | 0.16454(9)  | 0.0196(3)   |
| C15  | 0.27985(19) | 0.41918(15) | 0.23853(9)  | 0.0182(3)   |

**Table 3 . Positional Parameters for Hydrogens in Compound 1436**

| Atom | x      | y      | z      | U(eq) |
|------|--------|--------|--------|-------|
| H1   | 0.458  | 0.597  | 0.5272 | 0.028 |
| H5   | 0.7677 | 0.5949 | 0.469  | 0.026 |
| H6   | 1.0118 | 0.4661 | 0.4668 | 0.028 |
| H8   | 0.7741 | 0.1527 | 0.3597 | 0.032 |
| H9   | 0.5279 | 0.2776 | 0.3663 | 0.028 |
| H11  | 0.6335 | 0.5748 | 0.2606 | 0.024 |
| H12  | 0.6772 | 0.4845 | 0.1375 | 0.026 |
| H13  | 0.4725 | 0.3543 | 0.0776 | 0.026 |
| H14  | 0.2246 | 0.3142 | 0.1403 | 0.026 |
| H15  | 0.1804 | 0.4022 | 0.2638 | 0.024 |

**Table 4 . Refined Thermal Parameters (U's) for Compound 1436**

| <b>Atom</b> | <b>U<sub>11</sub></b> | <b>U<sub>22</sub></b> | <b>U<sub>33</sub></b> | <b>U<sub>23</sub></b> | <b>U<sub>13</sub></b> | <b>U<sub>12</sub></b> |
|-------------|-----------------------|-----------------------|-----------------------|-----------------------|-----------------------|-----------------------|
| Cl1         | 0.01982(17)           | 0.03064(19)           | 0.0309(2)             | 0.00261(16)           | 0.00326(15)           | 0.00733(17)           |
| Cl2         | 0.0306(2)             | 0.0347(2)             | 0.0289(2)             | 0.00907(17)           | 0.00530(17)           | 0.0145(2)             |
| N1          | 0.0210(6)             | 0.0155(6)             | 0.0157(6)             | -0.0012(5)            | 0.0007(5)             | -0.0001(5)            |
| N2          | 0.0259(7)             | 0.0211(6)             | 0.0213(6)             | -0.0012(5)            | 0.0069(5)             | -0.0008(5)            |
| C1          | 0.0276(8)             | 0.0197(7)             | 0.0161(6)             | -0.0024(5)            | 0.0045(6)             | -0.0015(7)            |
| C2          | 0.0174(7)             | 0.0160(6)             | 0.0174(6)             | 0.0012(5)             | 0.0012(5)             | -0.0012(5)            |
| C3          | 0.0182(7)             | 0.0190(7)             | 0.0215(7)             | 0.0005(6)             | 0.0039(6)             | 0.0006(6)             |
| C4          | 0.0218(7)             | 0.0155(6)             | 0.0137(6)             | 0.0014(5)             | 0.0007(5)             | 0.0008(5)             |
| C5          | 0.0252(7)             | 0.0163(7)             | 0.0161(7)             | -0.0003(5)            | 0.0002(6)             | -0.0027(6)            |
| C6          | 0.0222(7)             | 0.0229(7)             | 0.0187(7)             | 0.0032(6)             | -0.0010(6)            | -0.0027(6)            |
| C7          | 0.0249(7)             | 0.0220(7)             | 0.0180(6)             | 0.0049(6)             | 0.0022(6)             | 0.0069(7)             |
| C8          | 0.0351(9)             | 0.0166(7)             | 0.0206(7)             | -0.0021(6)            | -0.0030(7)            | 0.0042(6)             |
| C9          | 0.0270(8)             | 0.0168(7)             | 0.0204(7)             | -0.0019(6)            | -0.0048(6)            | -0.0007(6)            |
| C10         | 0.0174(6)             | 0.0145(6)             | 0.0159(6)             | 0.0007(5)             | 0.0004(6)             | 0.0017(5)             |
| C11         | 0.0181(7)             | 0.0175(7)             | 0.0192(7)             | -0.0010(6)            | -0.0012(6)            | -0.0017(5)            |
| C12         | 0.0186(7)             | 0.0204(7)             | 0.0196(7)             | 0.0002(6)             | 0.0040(6)             | 0.0006(6)             |
| C13         | 0.0257(8)             | 0.0168(7)             | 0.0165(7)             | -0.0009(5)            | -0.0004(6)            | 0.0025(6)             |
| C14         | 0.0206(7)             | 0.0182(7)             | 0.0201(7)             | 0.0005(6)             | -0.0058(6)            | -0.0017(6)            |
| C15         | 0.0172(6)             | 0.0186(7)             | 0.0189(7)             | 0.0029(6)             | 0.0005(6)             | -0.0011(5)            |

**Table 5 . Bond Distances in Compound 1436, Å**

|         |            |         |            |         |            |
|---------|------------|---------|------------|---------|------------|
| Cl1-C3  | 1.7178(16) | Cl2-C7  | 1.7419(16) | N1-C1   | 1.3608(19) |
| N1-C2   | 1.3906(19) | N1-C4   | 1.4318(19) | N2-C1   | 1.319(2)   |
| N2-C3   | 1.366(2)   | C2-C3   | 1.367(2)   | C2-C10  | 1.4721(19) |
| C4-C5   | 1.387(2)   | C4-C9   | 1.392(2)   | C5-C6   | 1.390(2)   |
| C6-C7   | 1.391(2)   | C7-C8   | 1.380(2)   | C8-C9   | 1.389(2)   |
| C10-C11 | 1.396(2)   | C10-C15 | 1.396(2)   | C11-C12 | 1.392(2)   |
| C12-C13 | 1.391(2)   | C13-C14 | 1.385(2)   | C14-C15 | 1.392(2)   |

**Table 6 . Bond Angles in Compound 1436, °**

|             |            |             |            |             |            |
|-------------|------------|-------------|------------|-------------|------------|
| C1-N1-C2    | 107.19(13) | C1-N1-C4    | 126.15(13) | C2-N1-C4    | 126.66(12) |
| C1-N2-C3    | 103.80(13) | N2-C1-N1    | 112.48(14) | N1-C2-C10   | 124.42(13) |
| C3-C2-N1    | 103.52(13) | C3-C2-C10   | 132.05(14) | N2-C3-Cl1   | 121.25(12) |
| N2-C3-C2    | 113.01(14) | C2-C3-Cl1   | 125.64(12) | C5-C4-N1    | 119.43(13) |
| C5-C4-C9    | 121.38(14) | C9-C4-N1    | 119.19(14) | C4-C5-C6    | 119.38(14) |
| C5-C6-C7    | 118.83(15) | C6-C7-Cl2   | 118.69(13) | C8-C7-Cl2   | 119.37(12) |
| C8-C7-C6    | 121.93(15) | C7-C8-C9    | 119.24(14) | C8-C9-C4    | 119.16(15) |
| C11-C10-C2  | 120.68(13) | C11-C10-C15 | 119.65(13) | C15-C10-C2  | 119.66(14) |
| C12-C11-C10 | 120.03(13) | C13-C12-C11 | 120.04(14) | C14-C13-C12 | 120.09(14) |
| C13-C14-C15 | 120.23(14) | C14-C15-C10 | 119.96(14) |             |            |

This report has been created with Olex2 [6], compiled on 2016.02.19 svn.r3266 for OlexSys.

#### Reference

- [1] APEX2 2014.11-0
- [2] SAINT v8.34A
- [3] SADABS v2014/5
- [4] SHELXS-97
- [5] SHELXL-2014/7
- [6] Olex2 (Dolomanov et al., 2009)



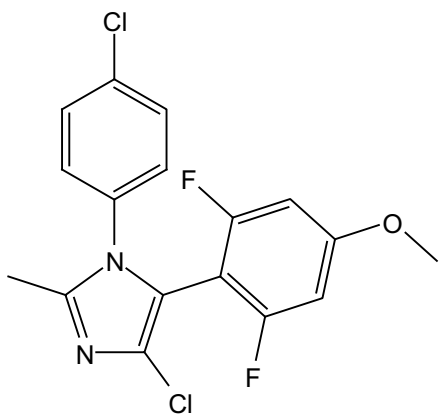

Compound 2

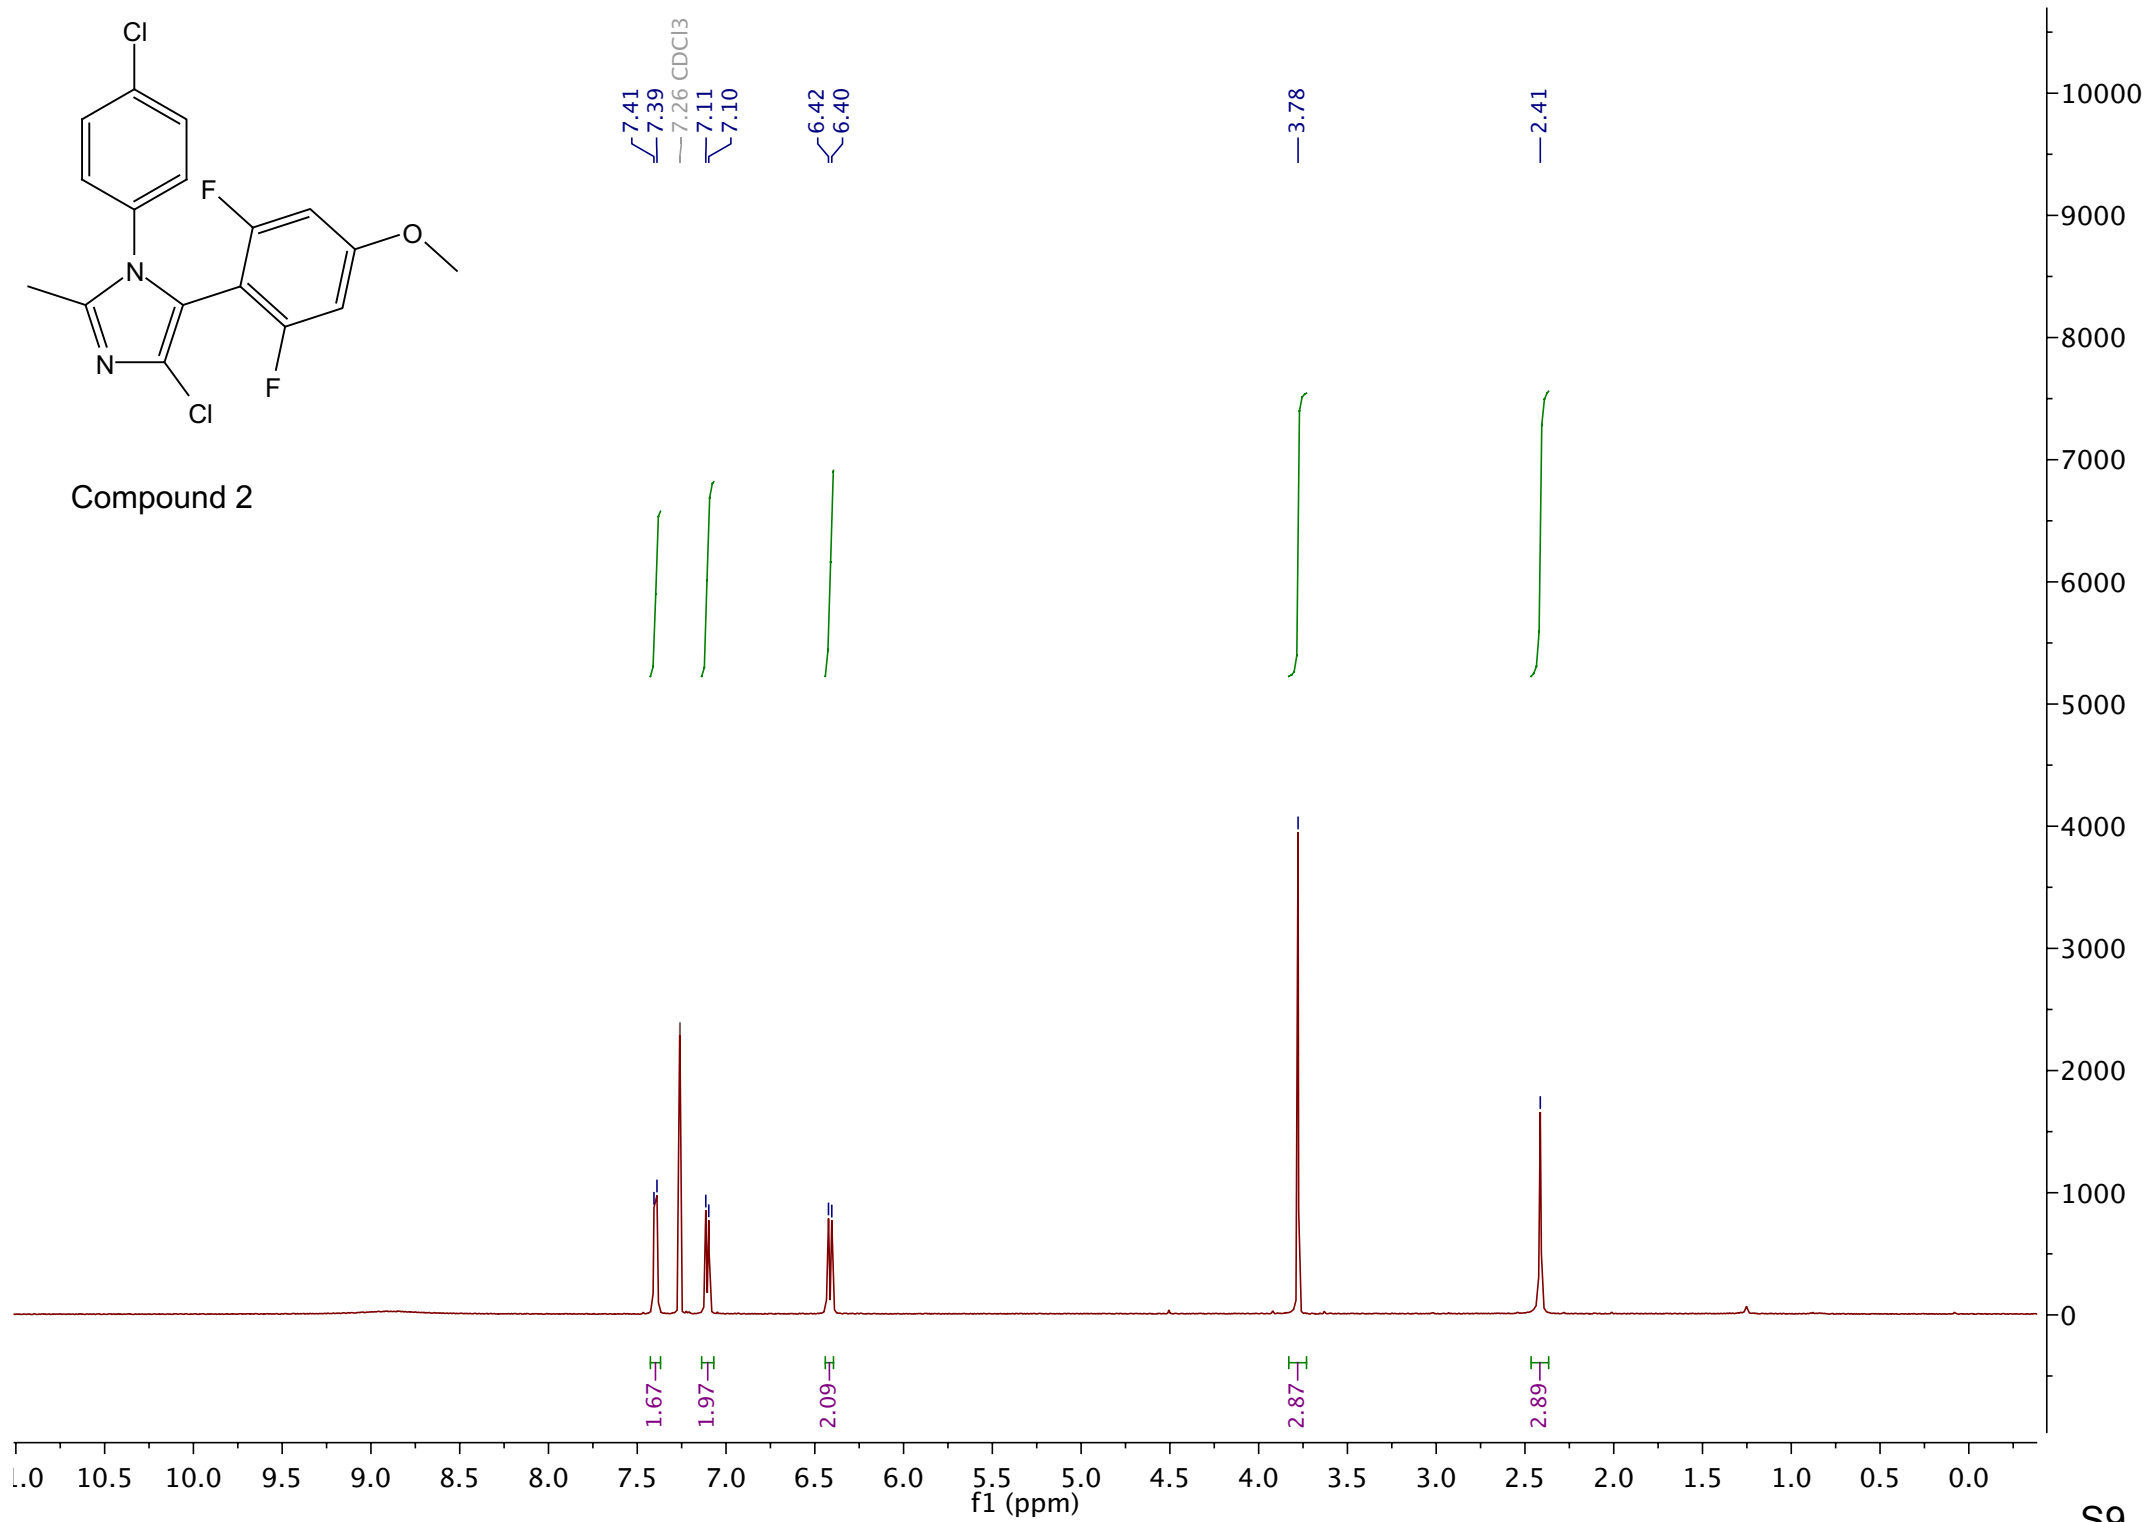

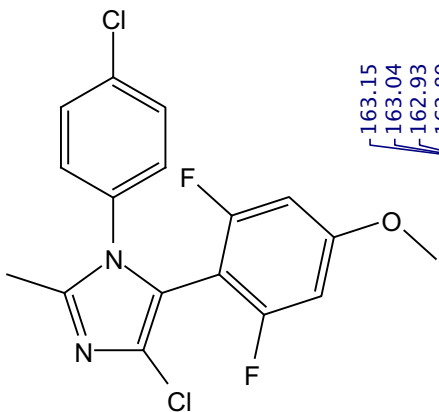

Compound 2

163.15  
163.04  
162.93  
162.89  
162.64  
162.61  
162.57  
160.66  
160.62  
160.58  
— 145.57  
136.10  
136.07  
133.46  
130.11  
129.90  
128.65  
128.38  
127.63  
— 117.32

98.49  
98.45  
98.41  
98.30  
98.27  
96.73  
96.56  
96.40

77.16-CDCl3

— 56.09

— 29.86

— 13.37

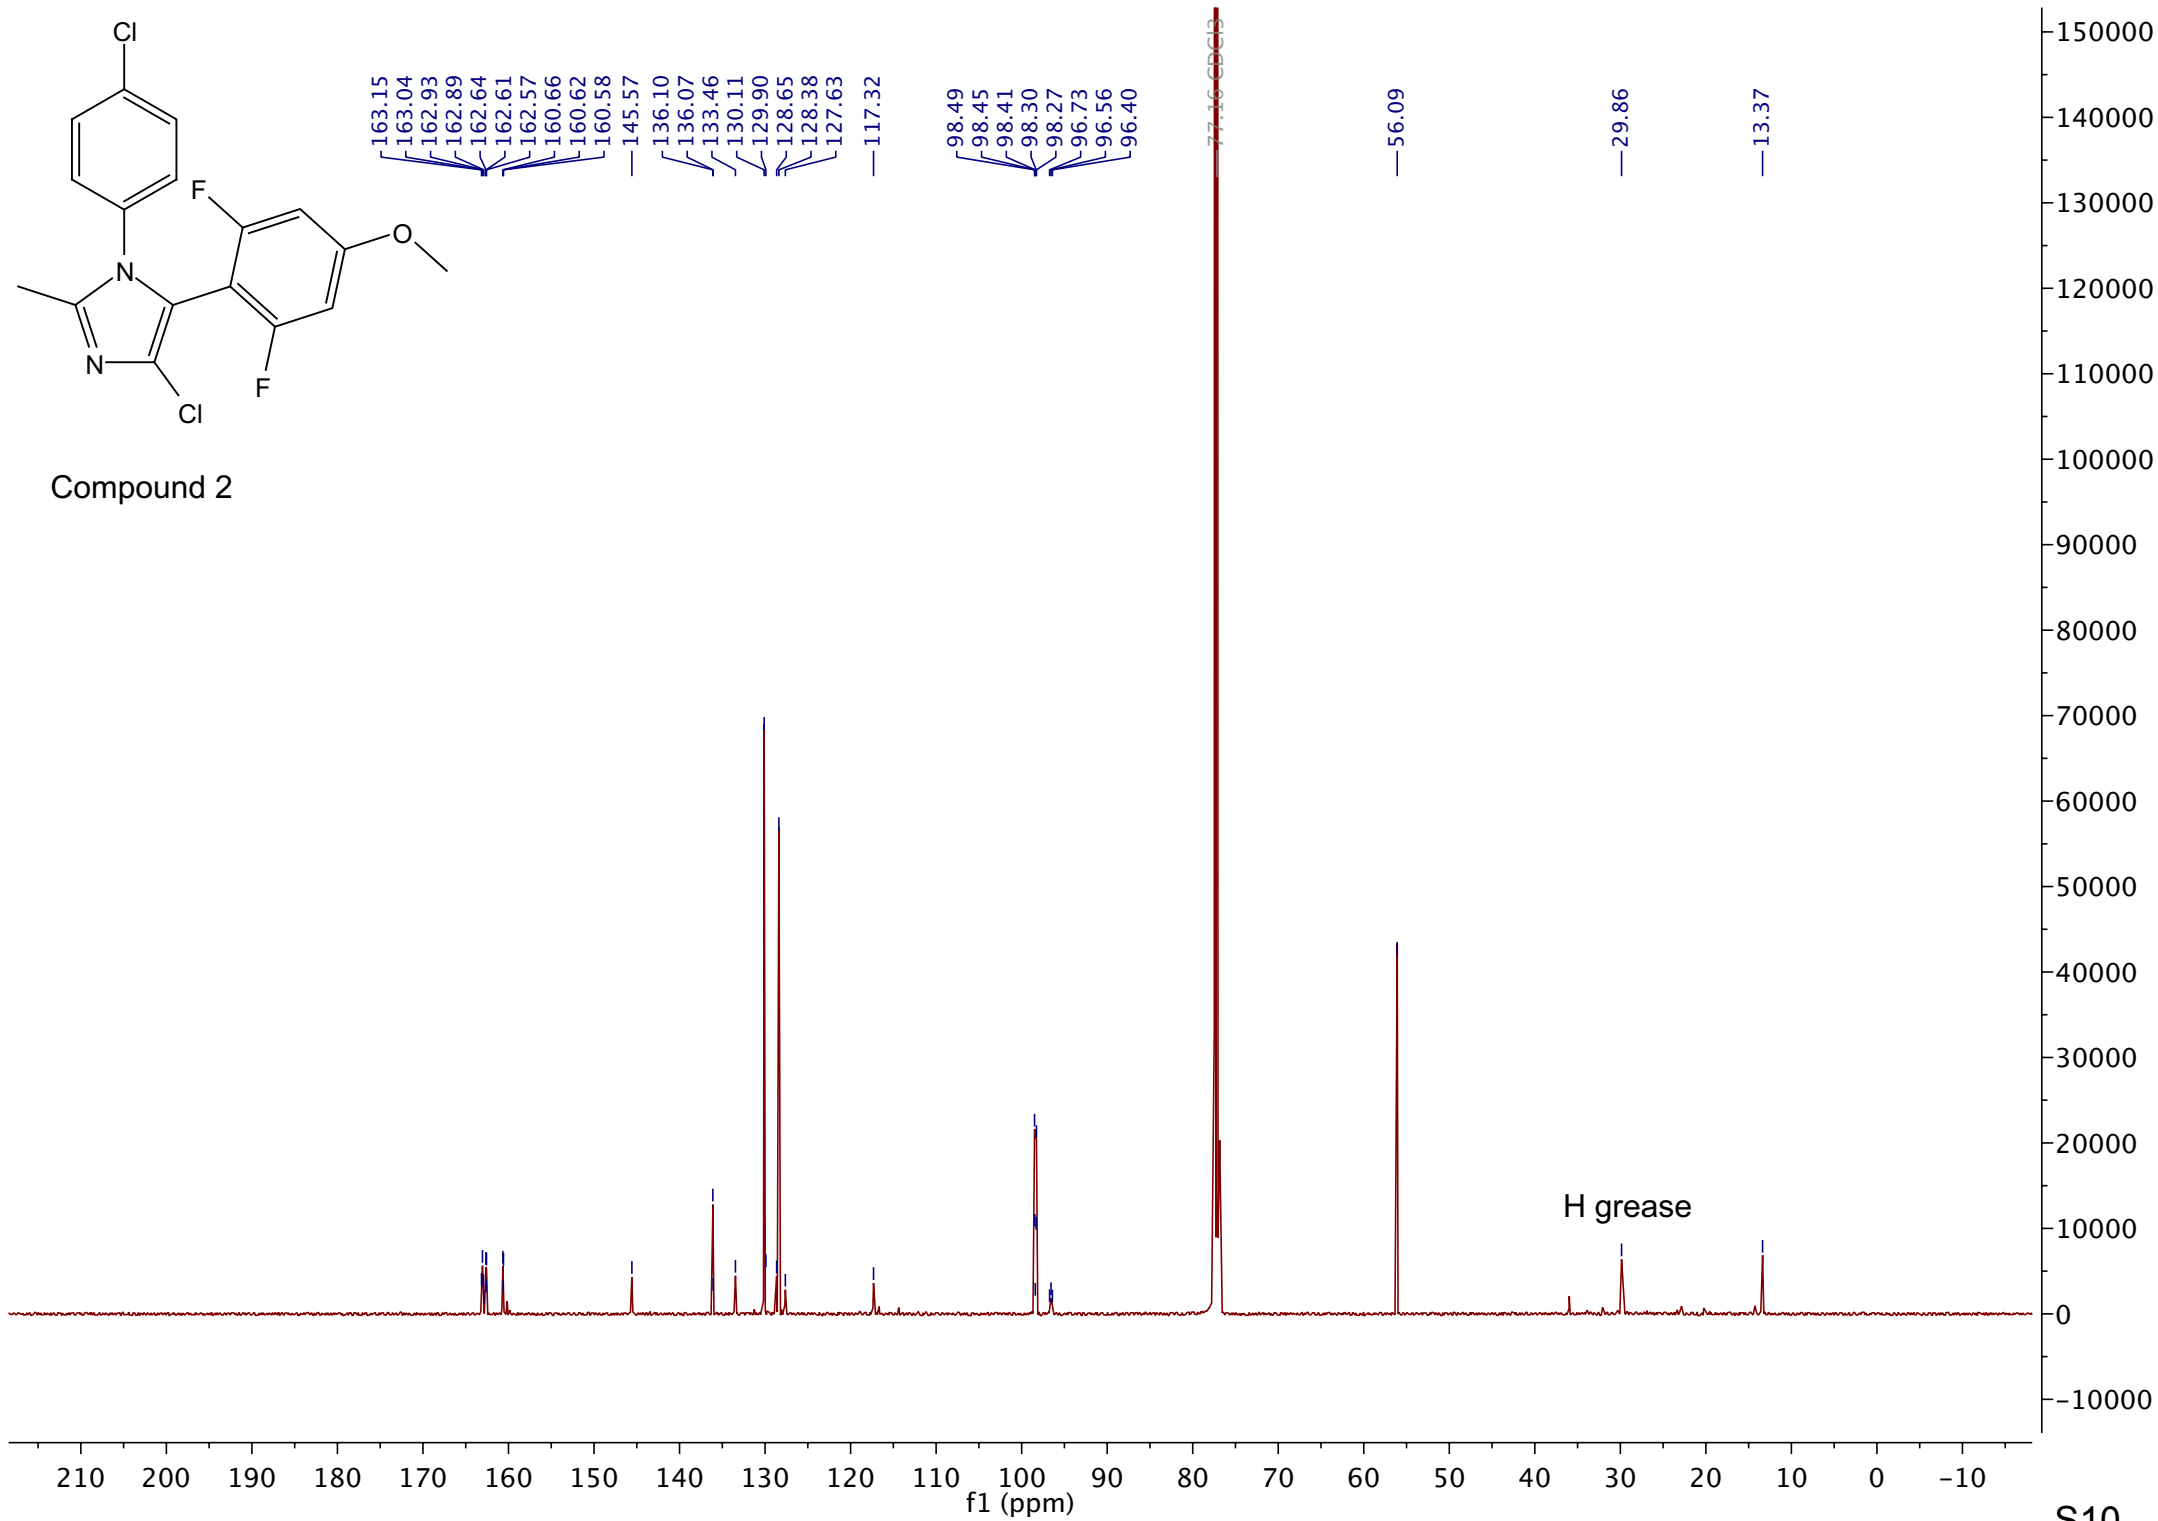

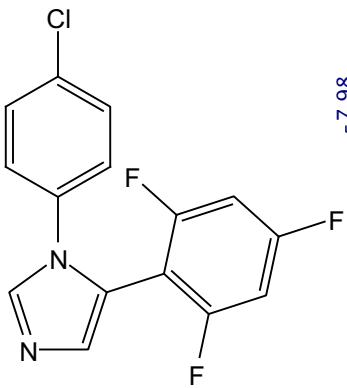

Compound 25

7.98  
7.39  
7.38  
7.38  
7.37  
7.36  
7.36  
7.35  
7.26 CDCl3  
7.13  
7.12  
7.12  
7.11  
7.10  
7.10  
7.09  
6.71  
6.70  
6.70  
6.69  
6.69  
6.68  
6.68  
6.67  
6.66  
6.66  
6.65

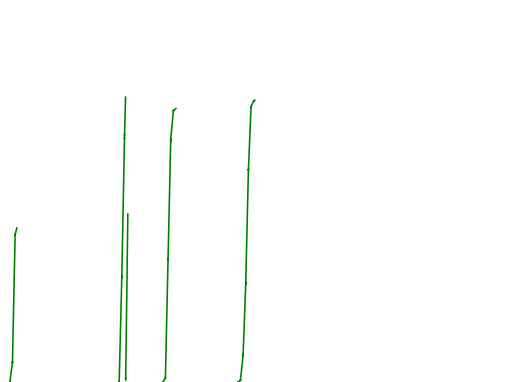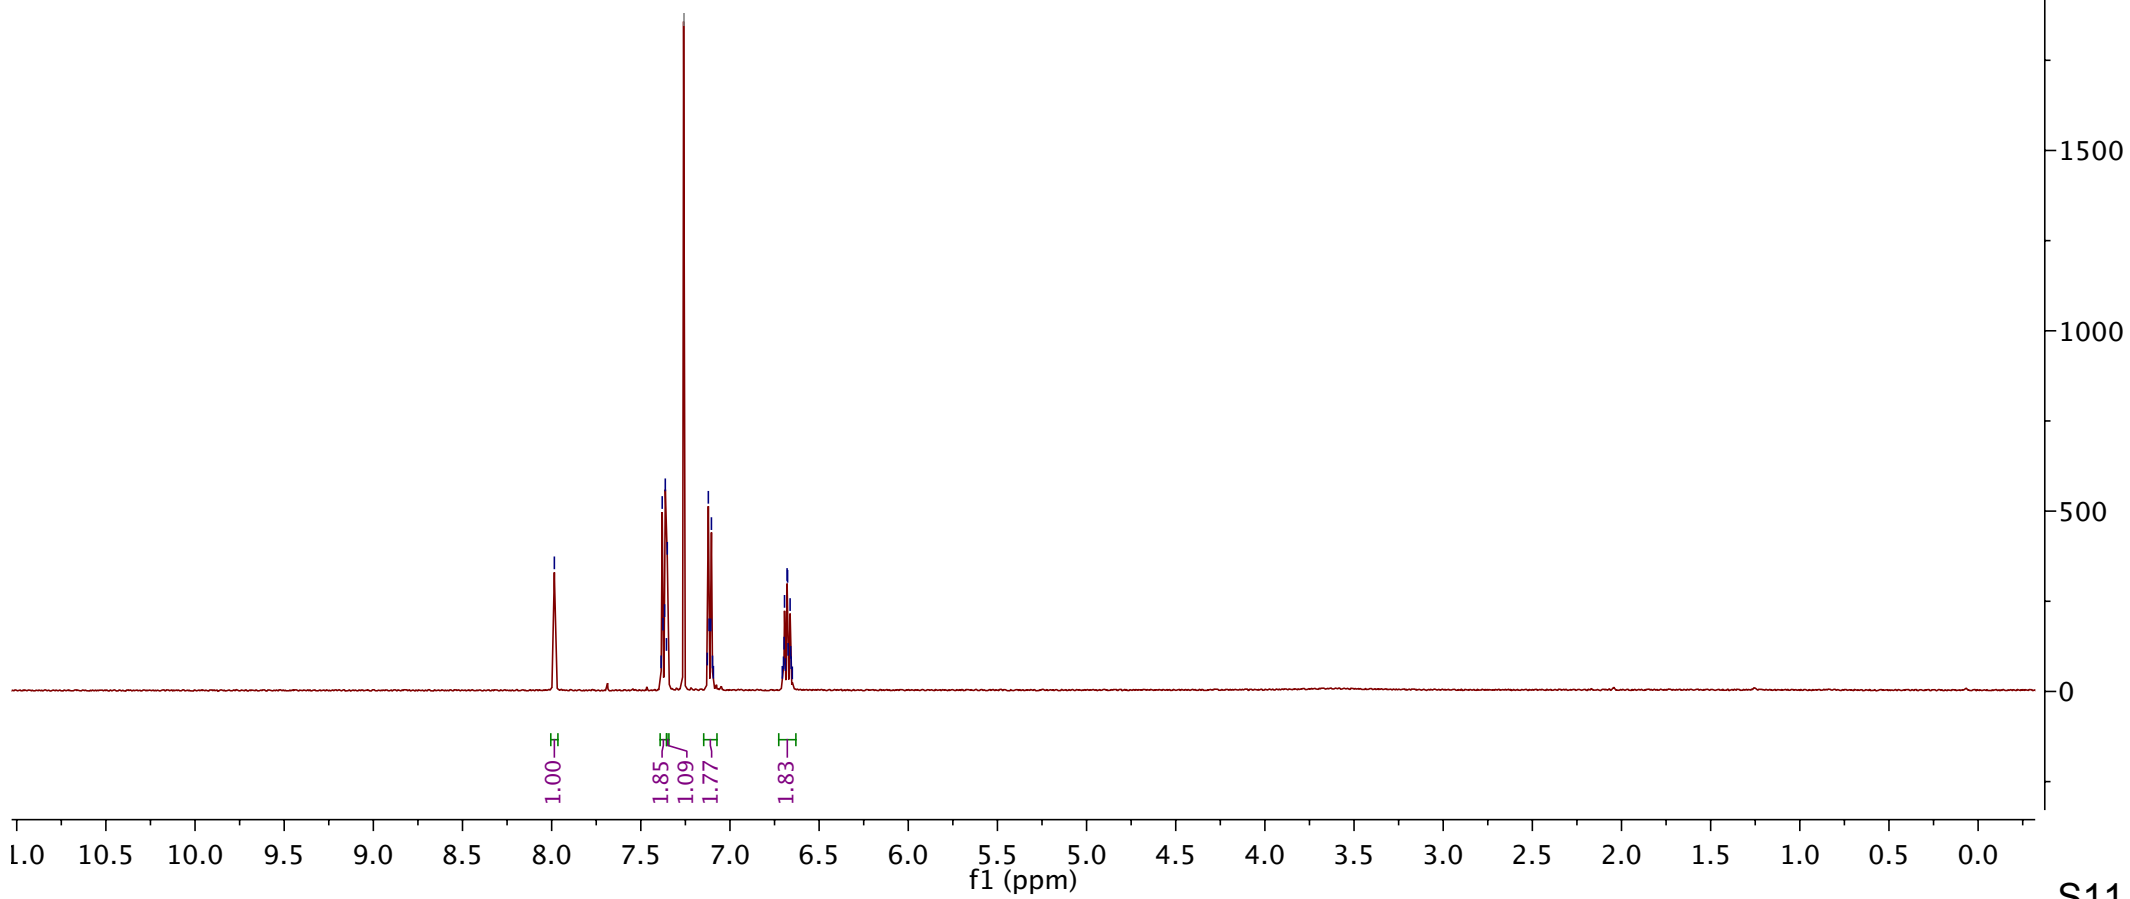

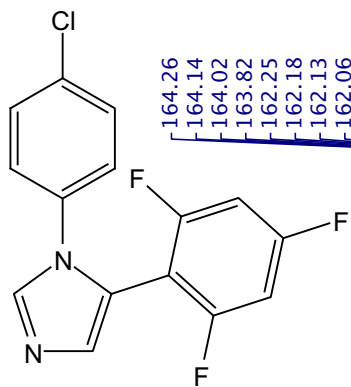

Compound 25

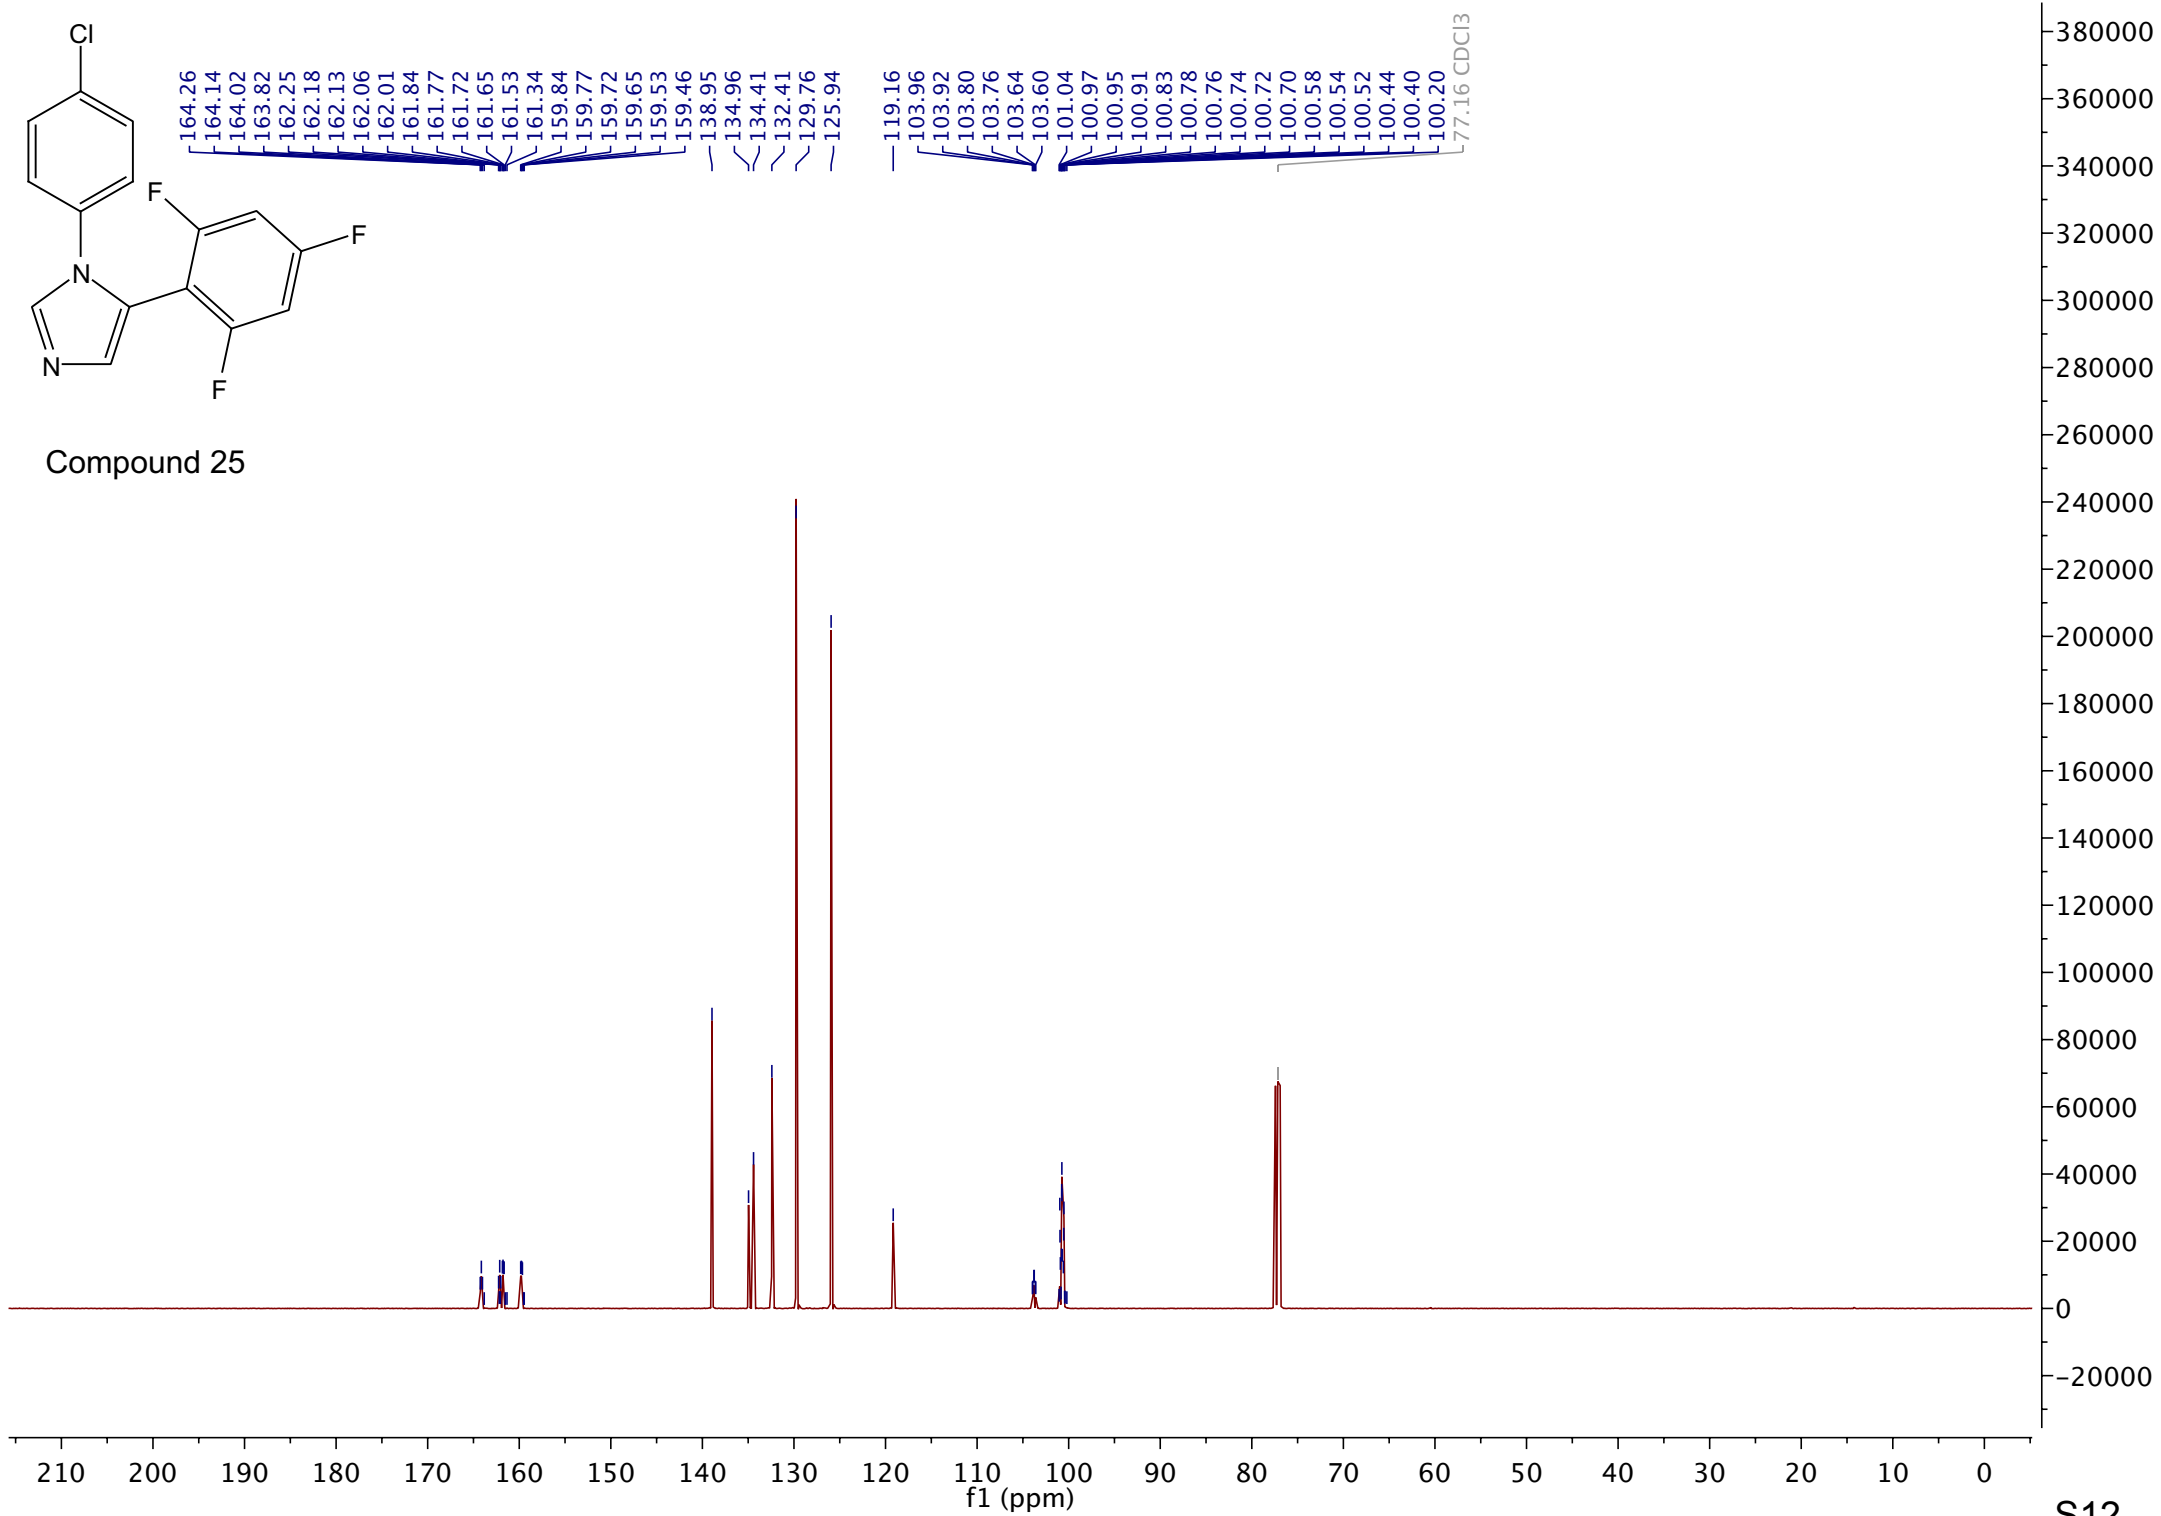

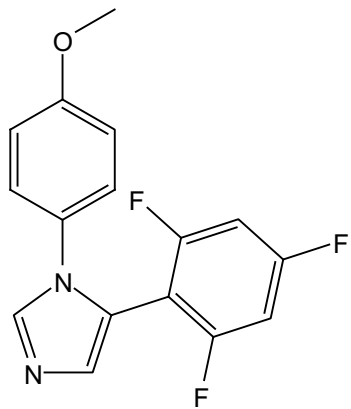

Compound 26

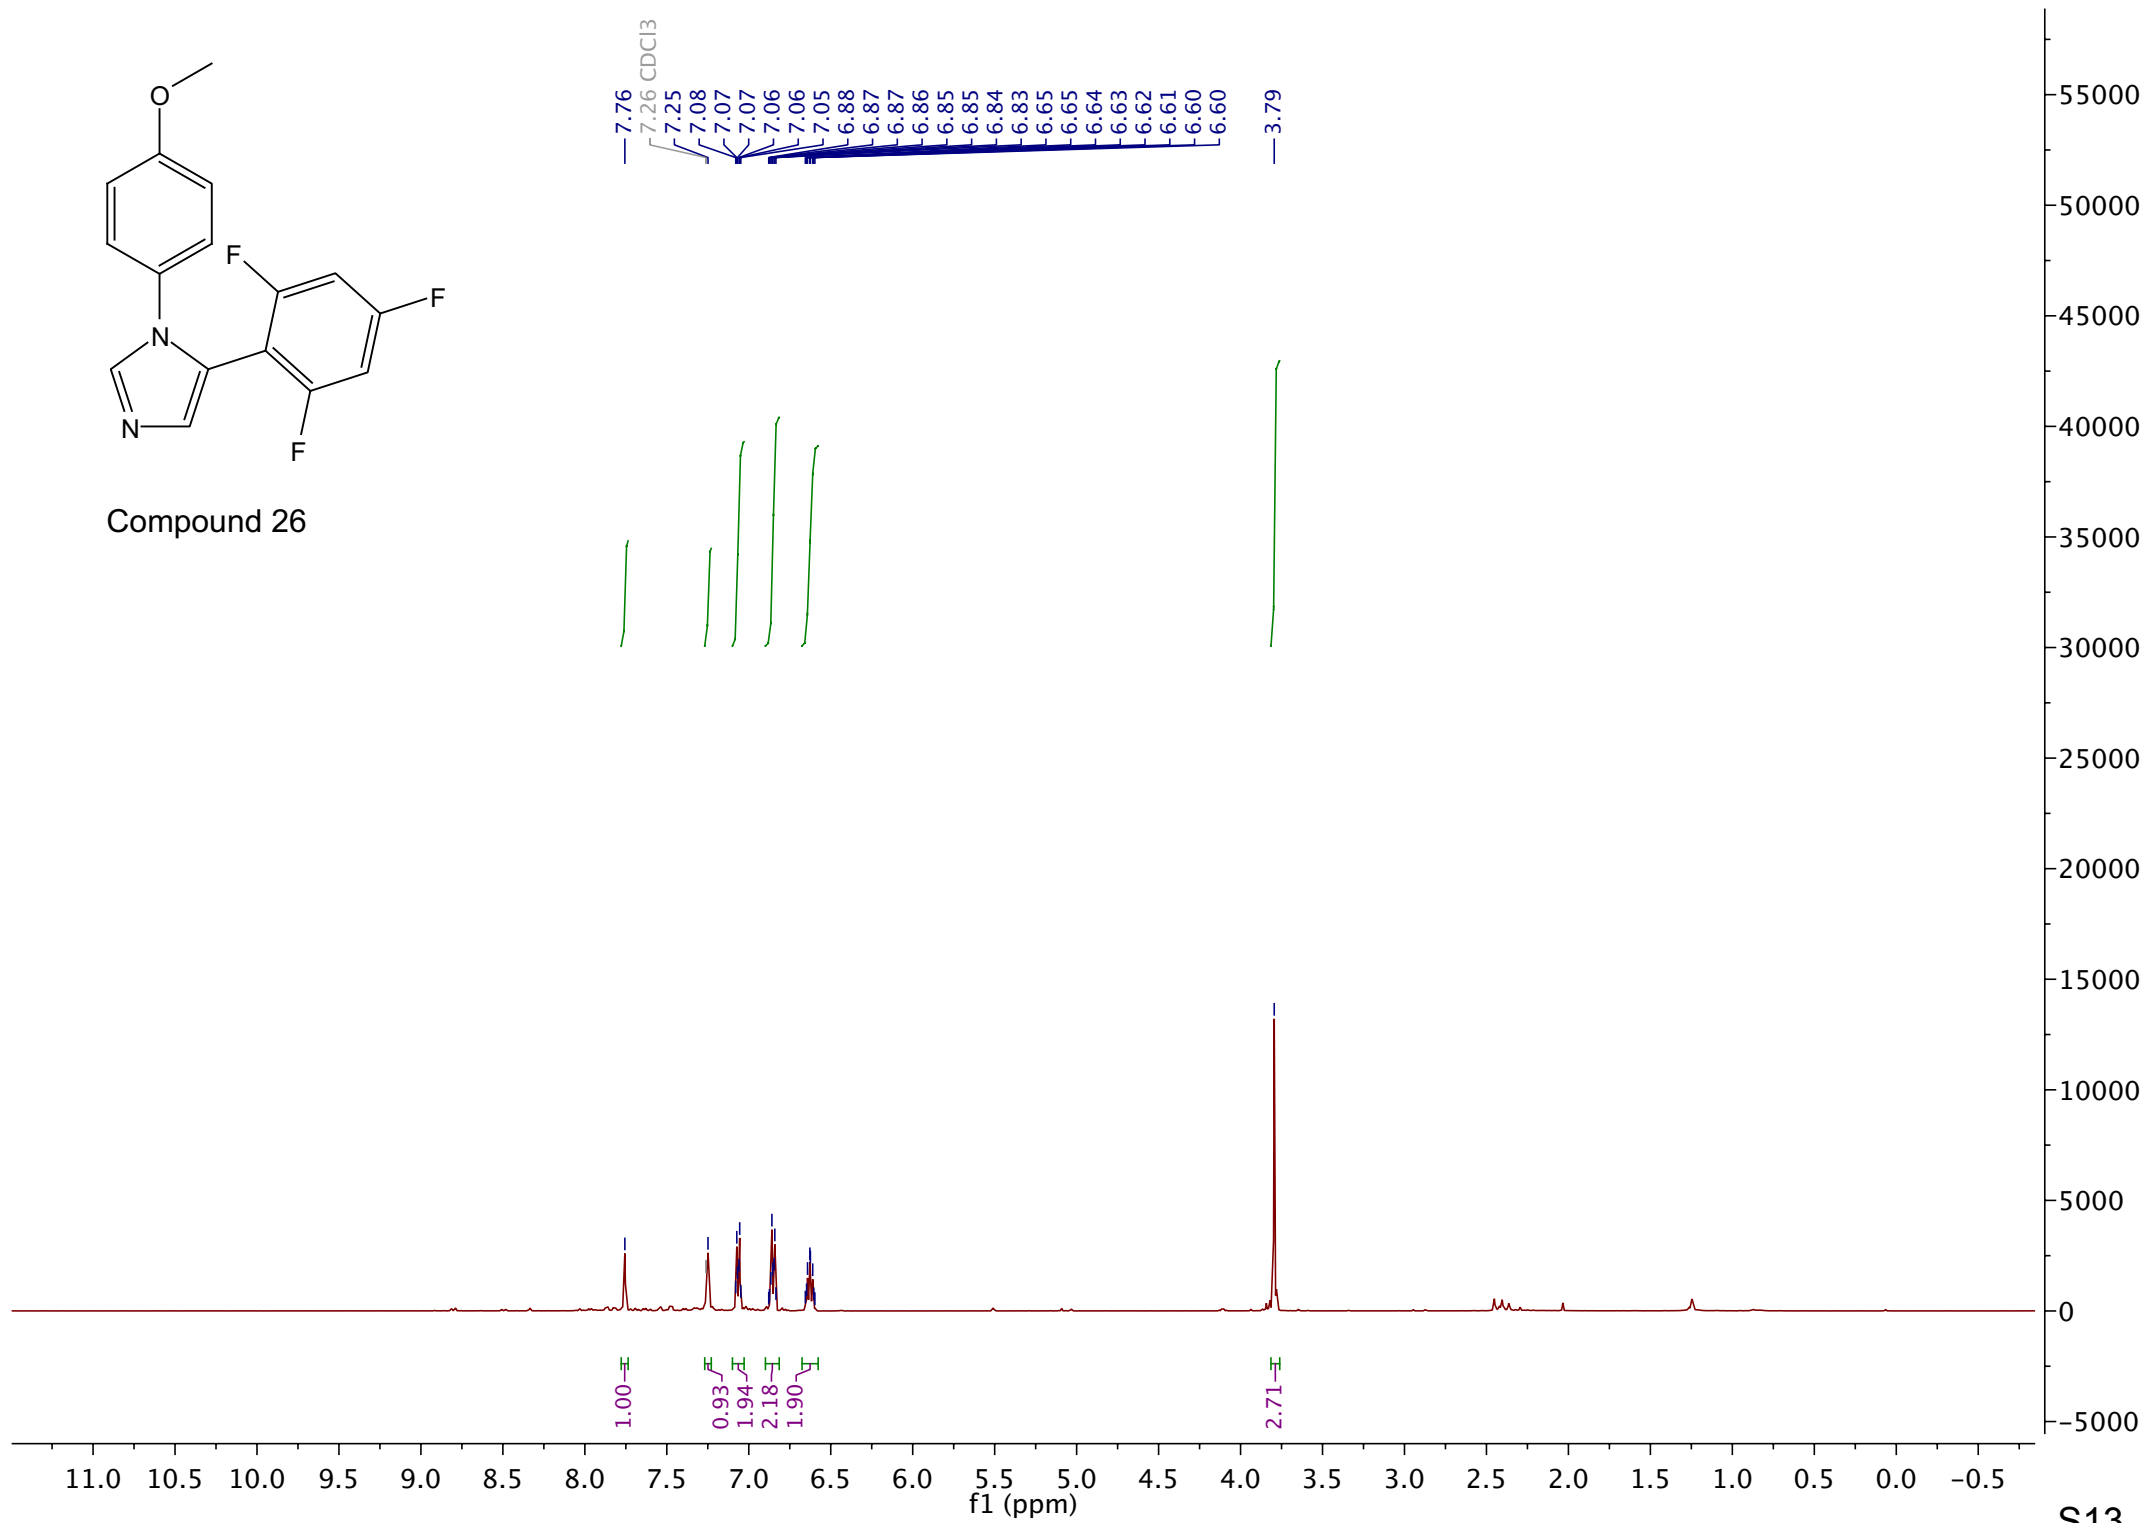

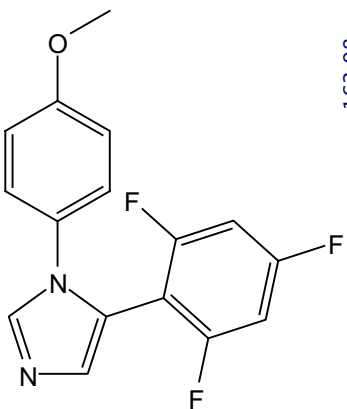

Compound 26

163.98  
163.88  
163.78  
162.31  
162.21  
162.11  
161.84  
161.79  
161.75  
161.69  
160.18  
160.12  
160.08  
160.02  
159.50  
139.30  
131.76  
129.26  
126.20  
119.50  
114.58  
104.26  
104.16  
104.13  
104.05  
104.00  
100.82  
100.78  
100.65  
100.62  
100.49  
100.45  
77.16 CDCl3  
55.61

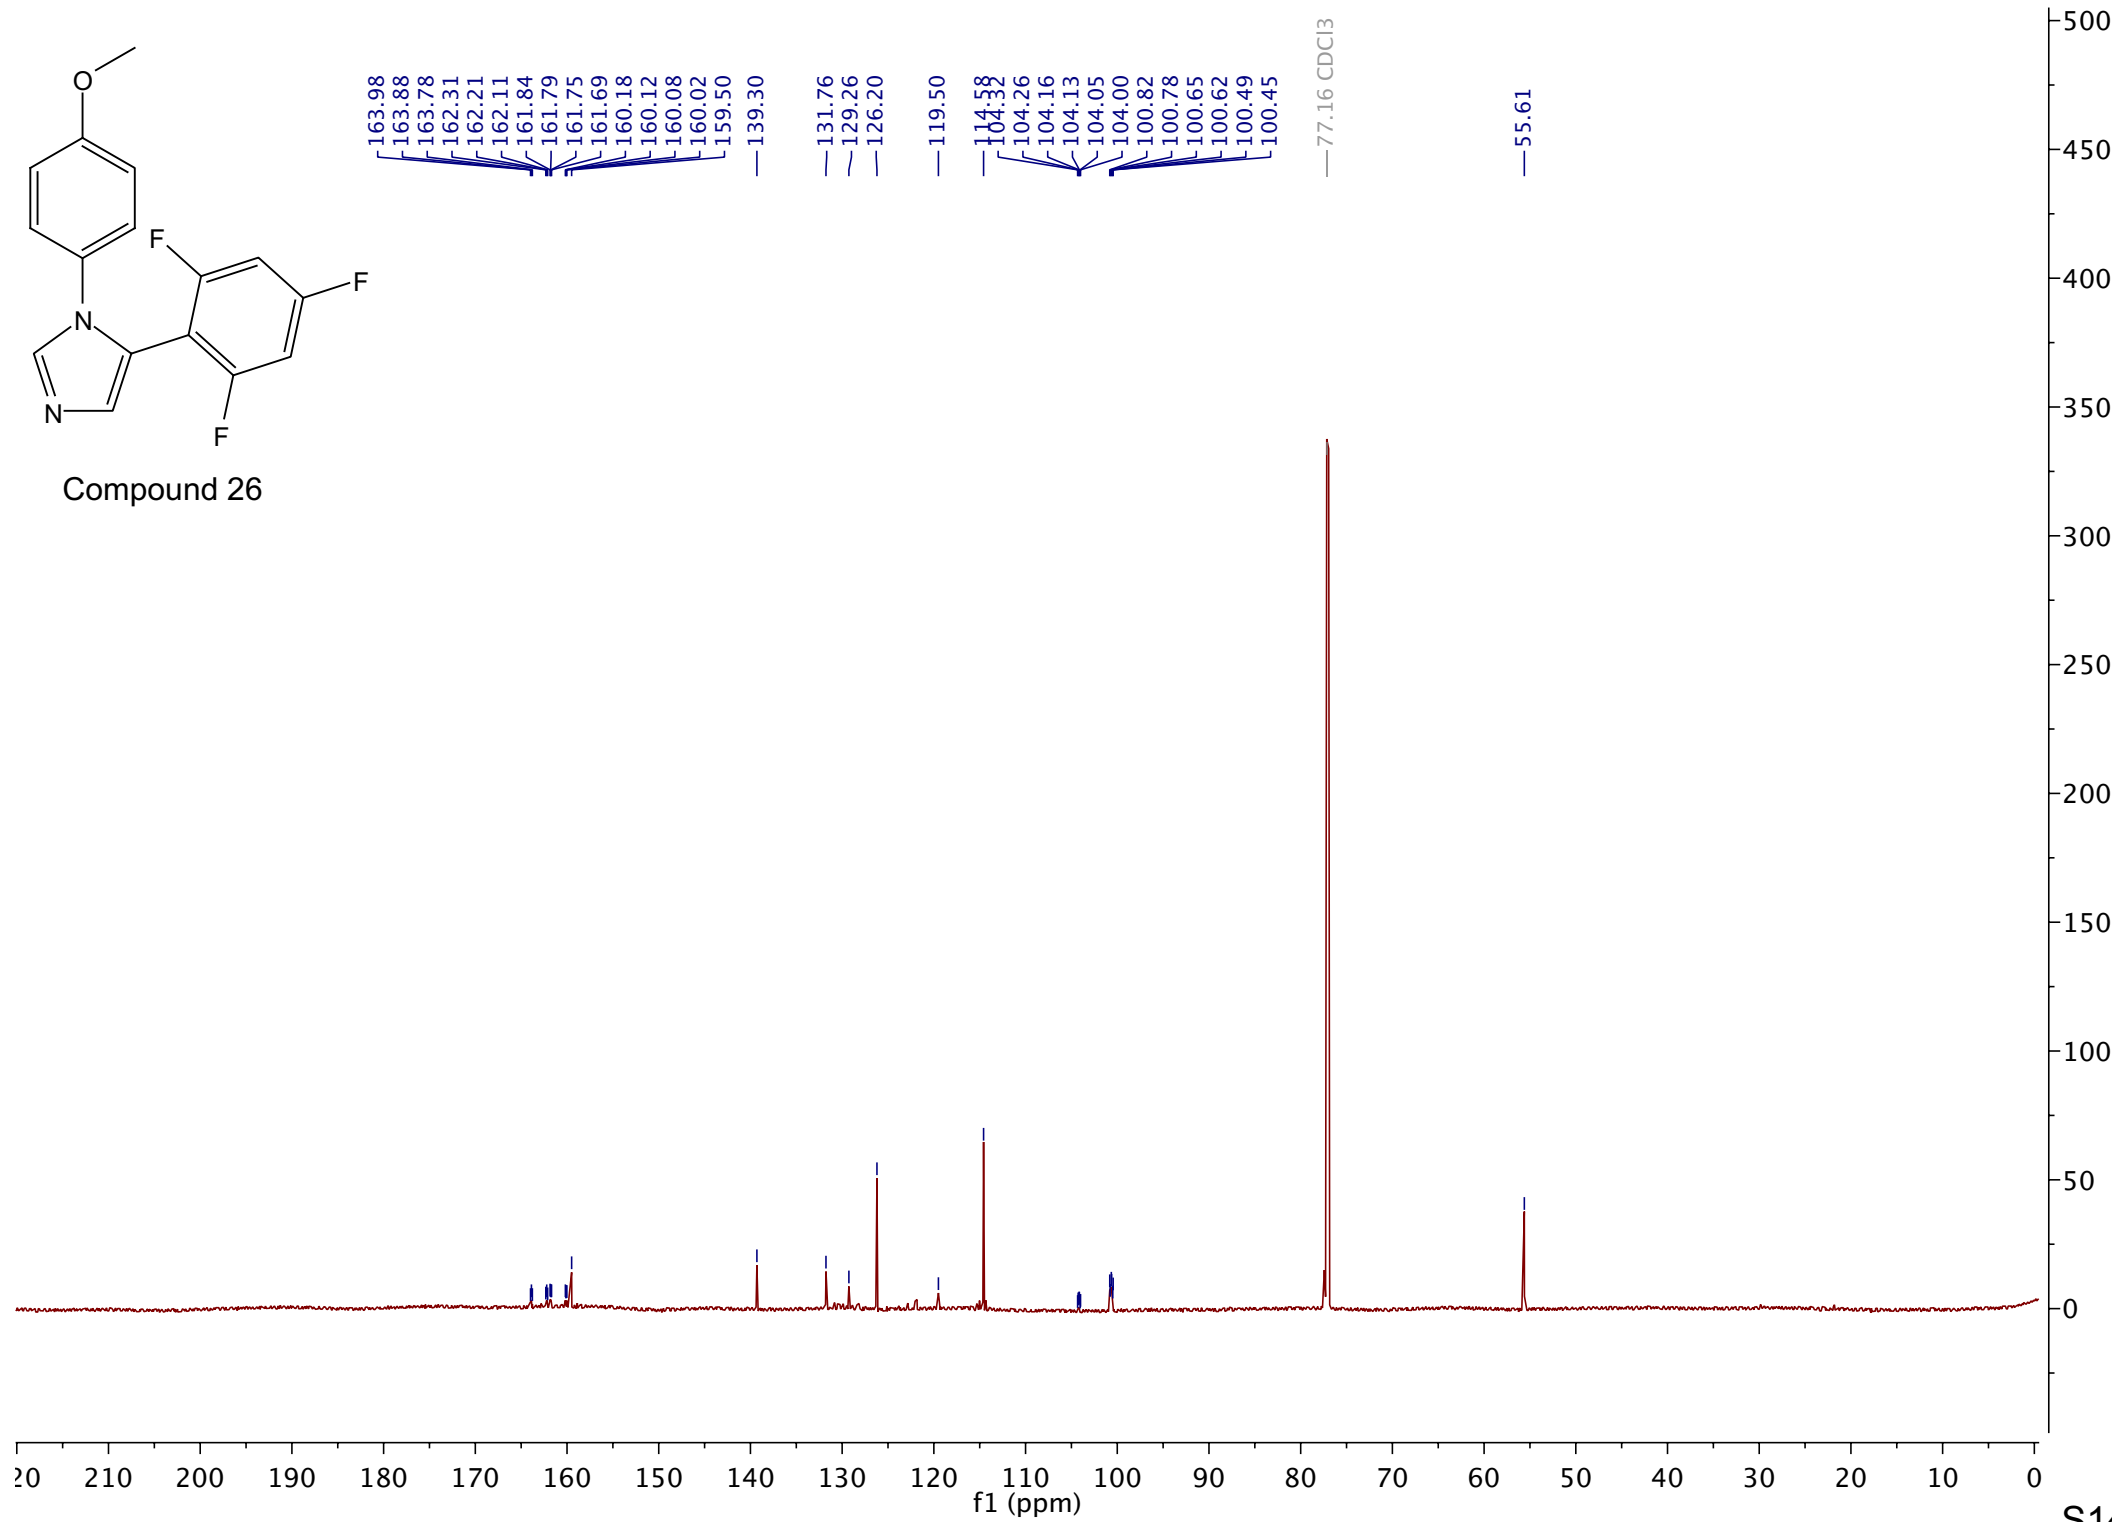

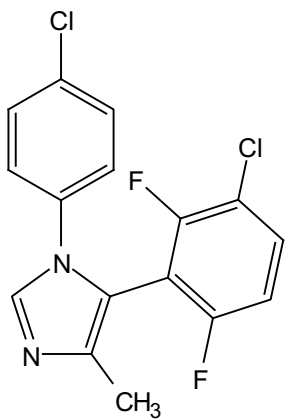

Compound 29

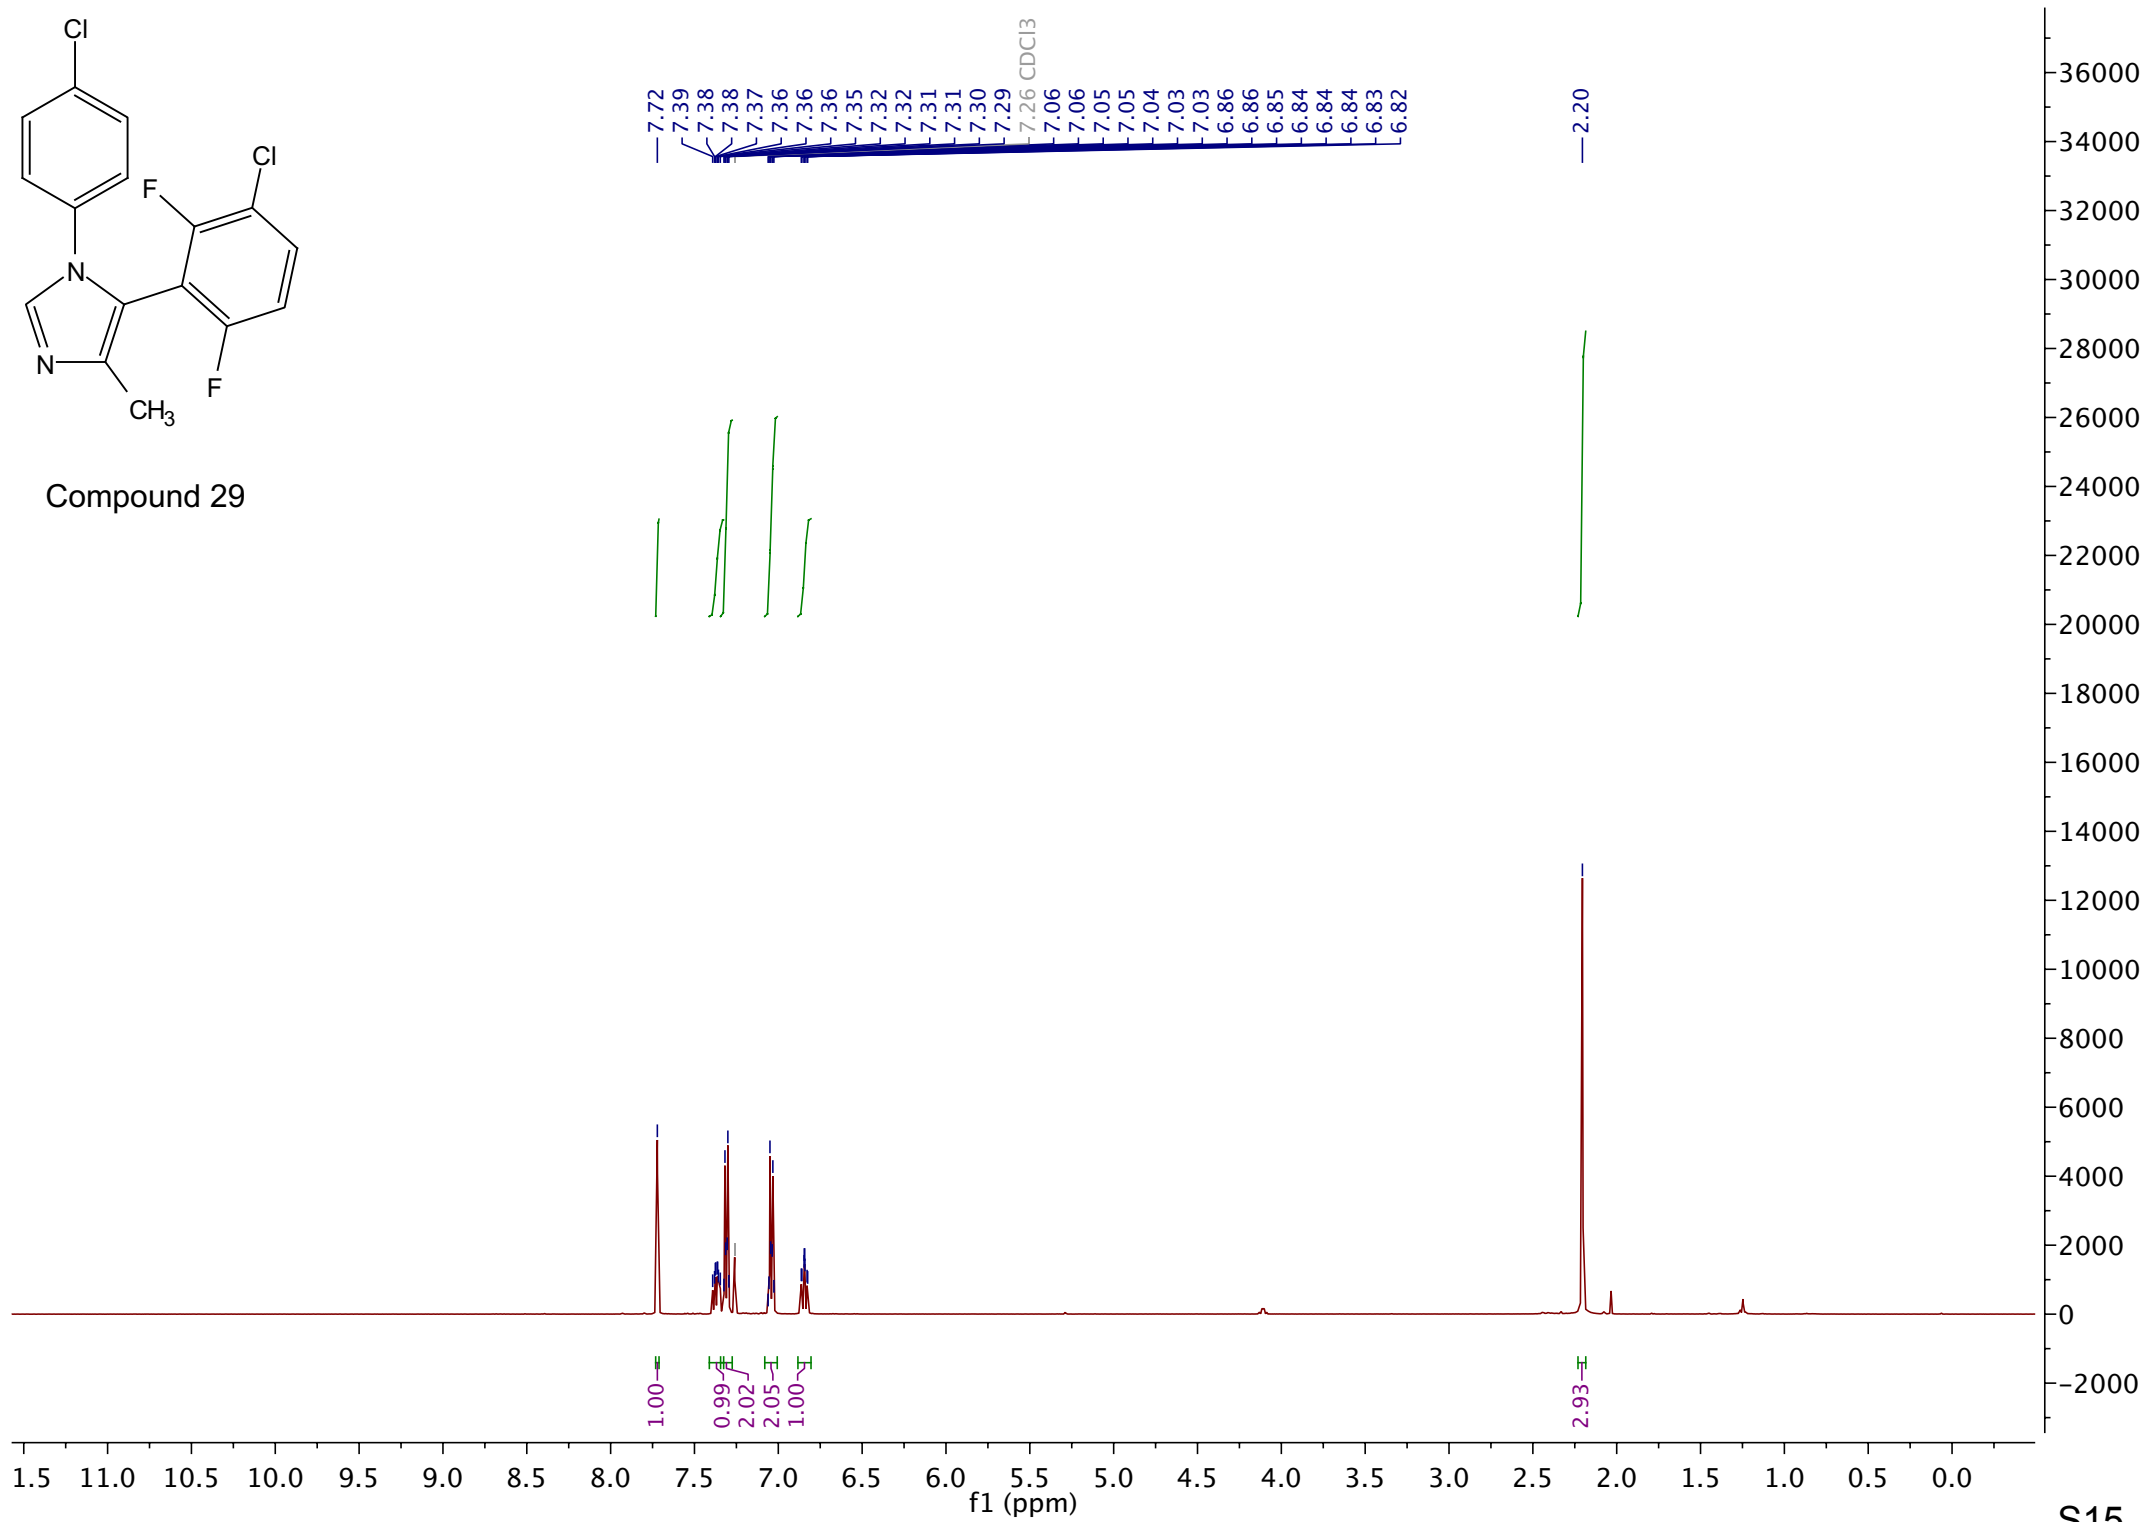

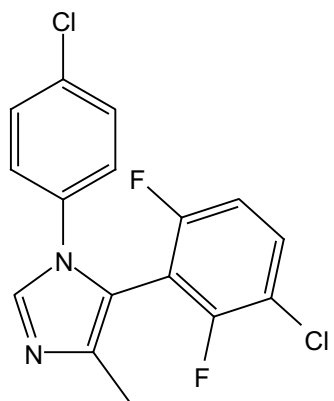

Compound 29

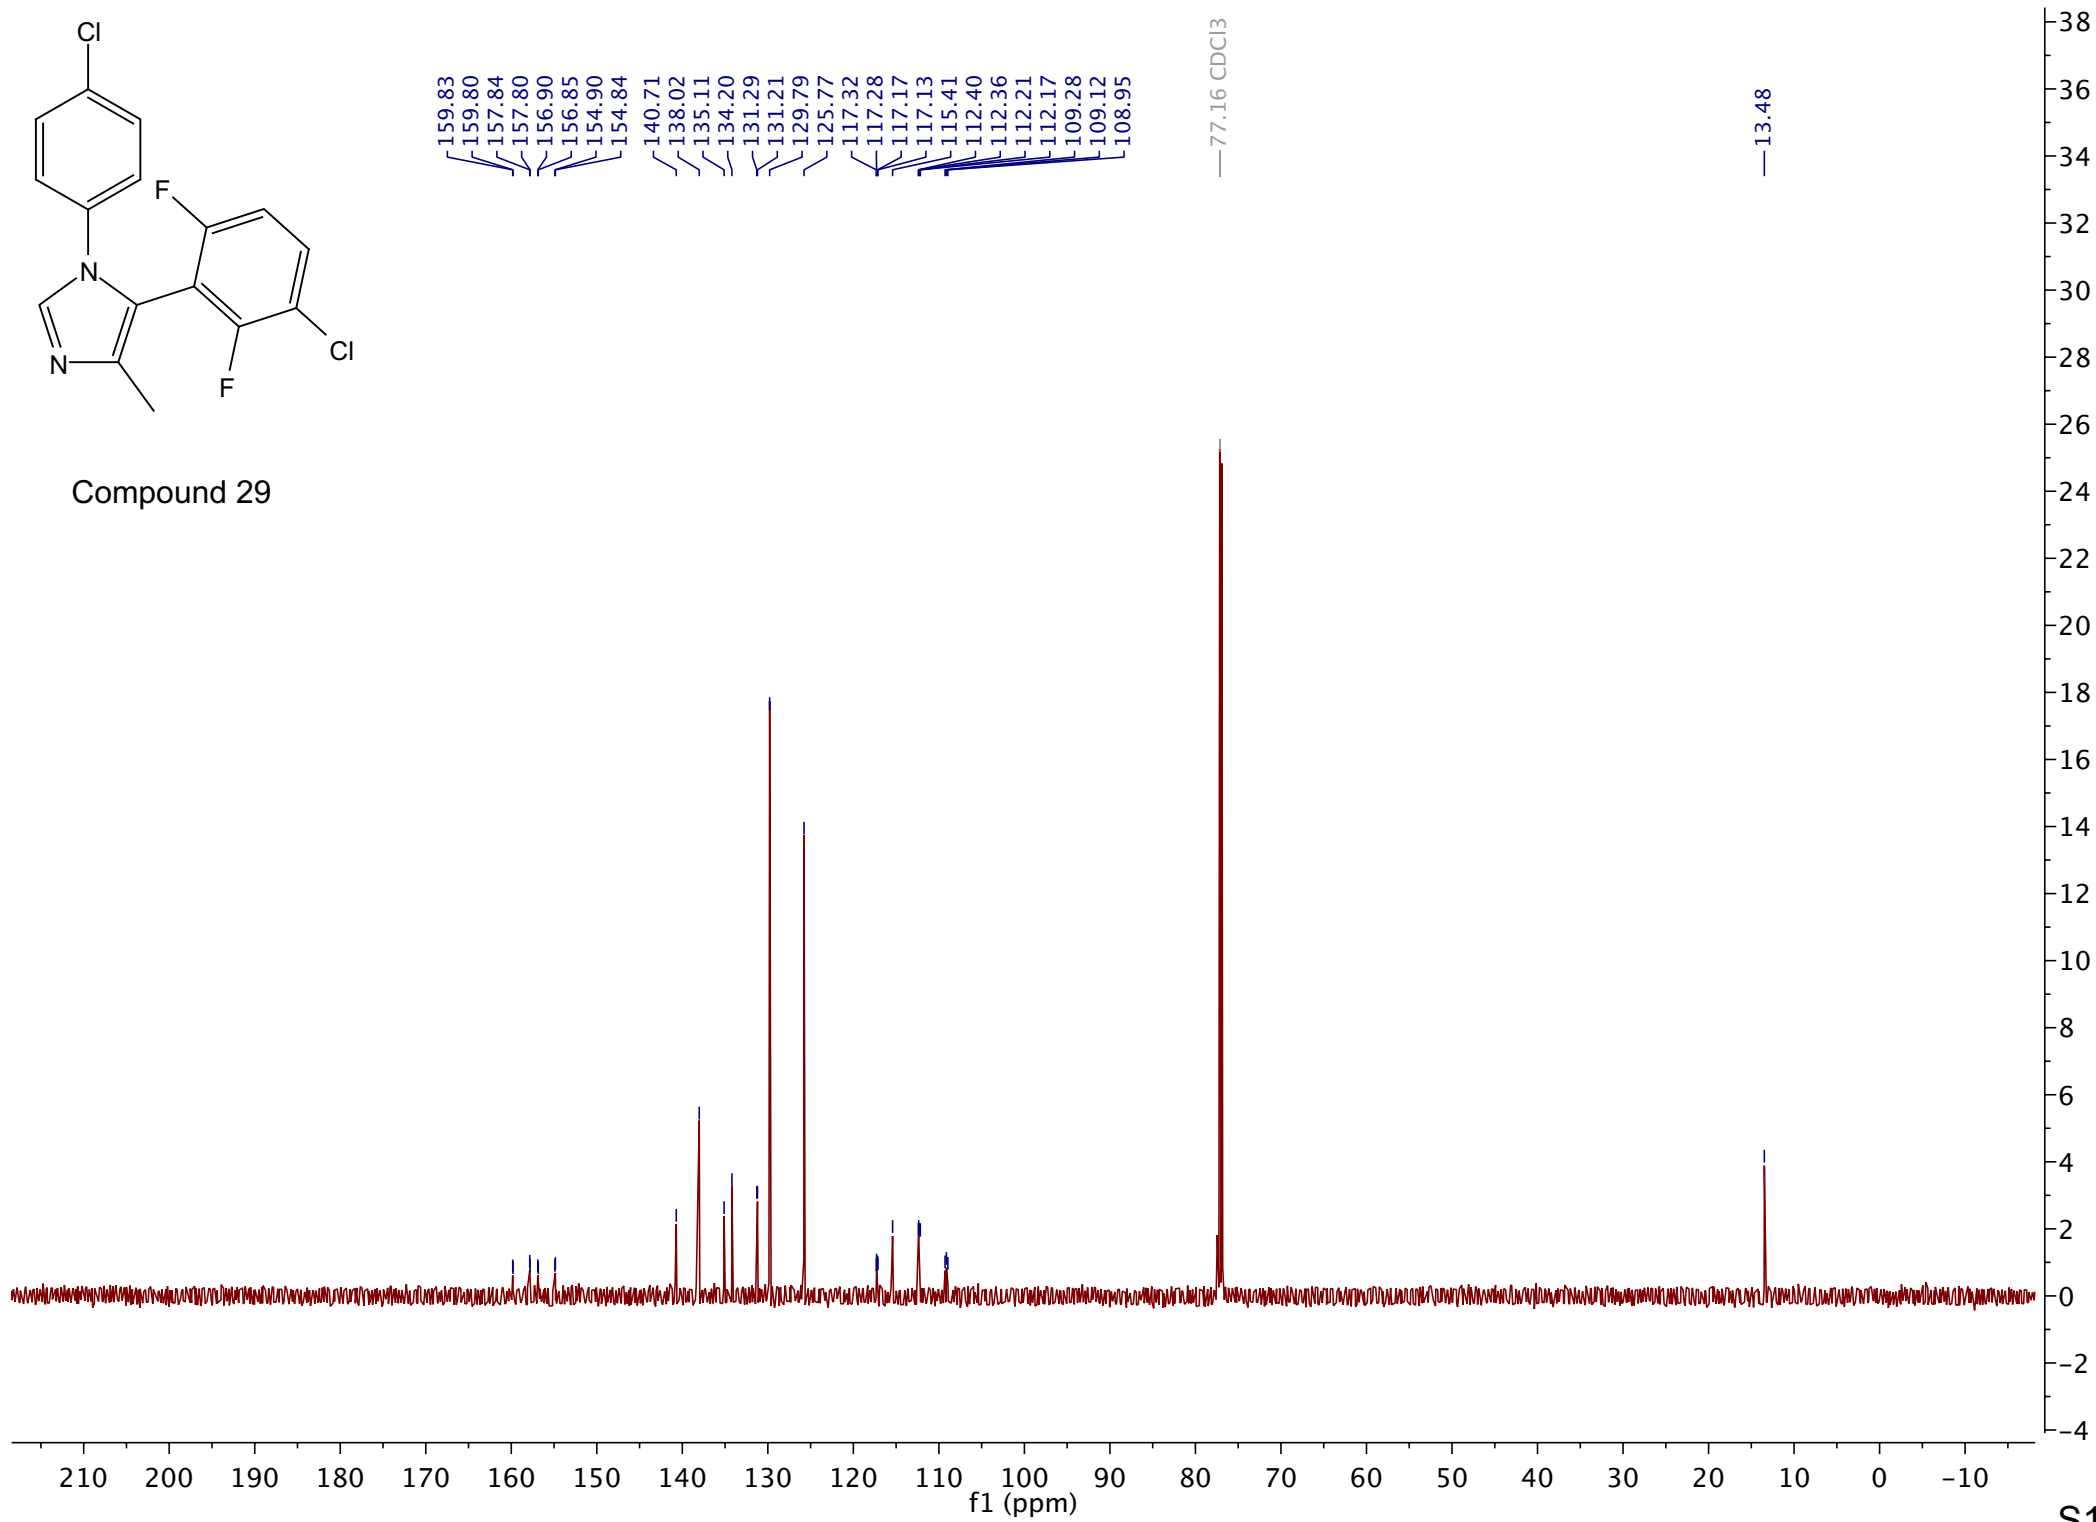



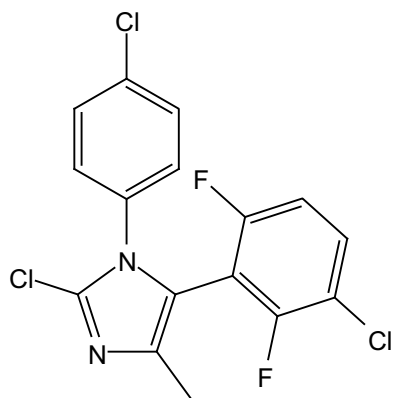

Compound 30

7.36  
7.35  
7.33  
7.26 CDCl<sub>3</sub>  
7.10  
7.09  
6.83  
6.82  
6.81

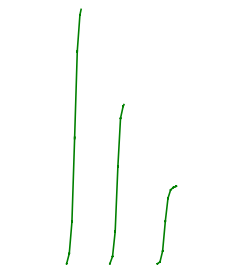

2.17

3.00

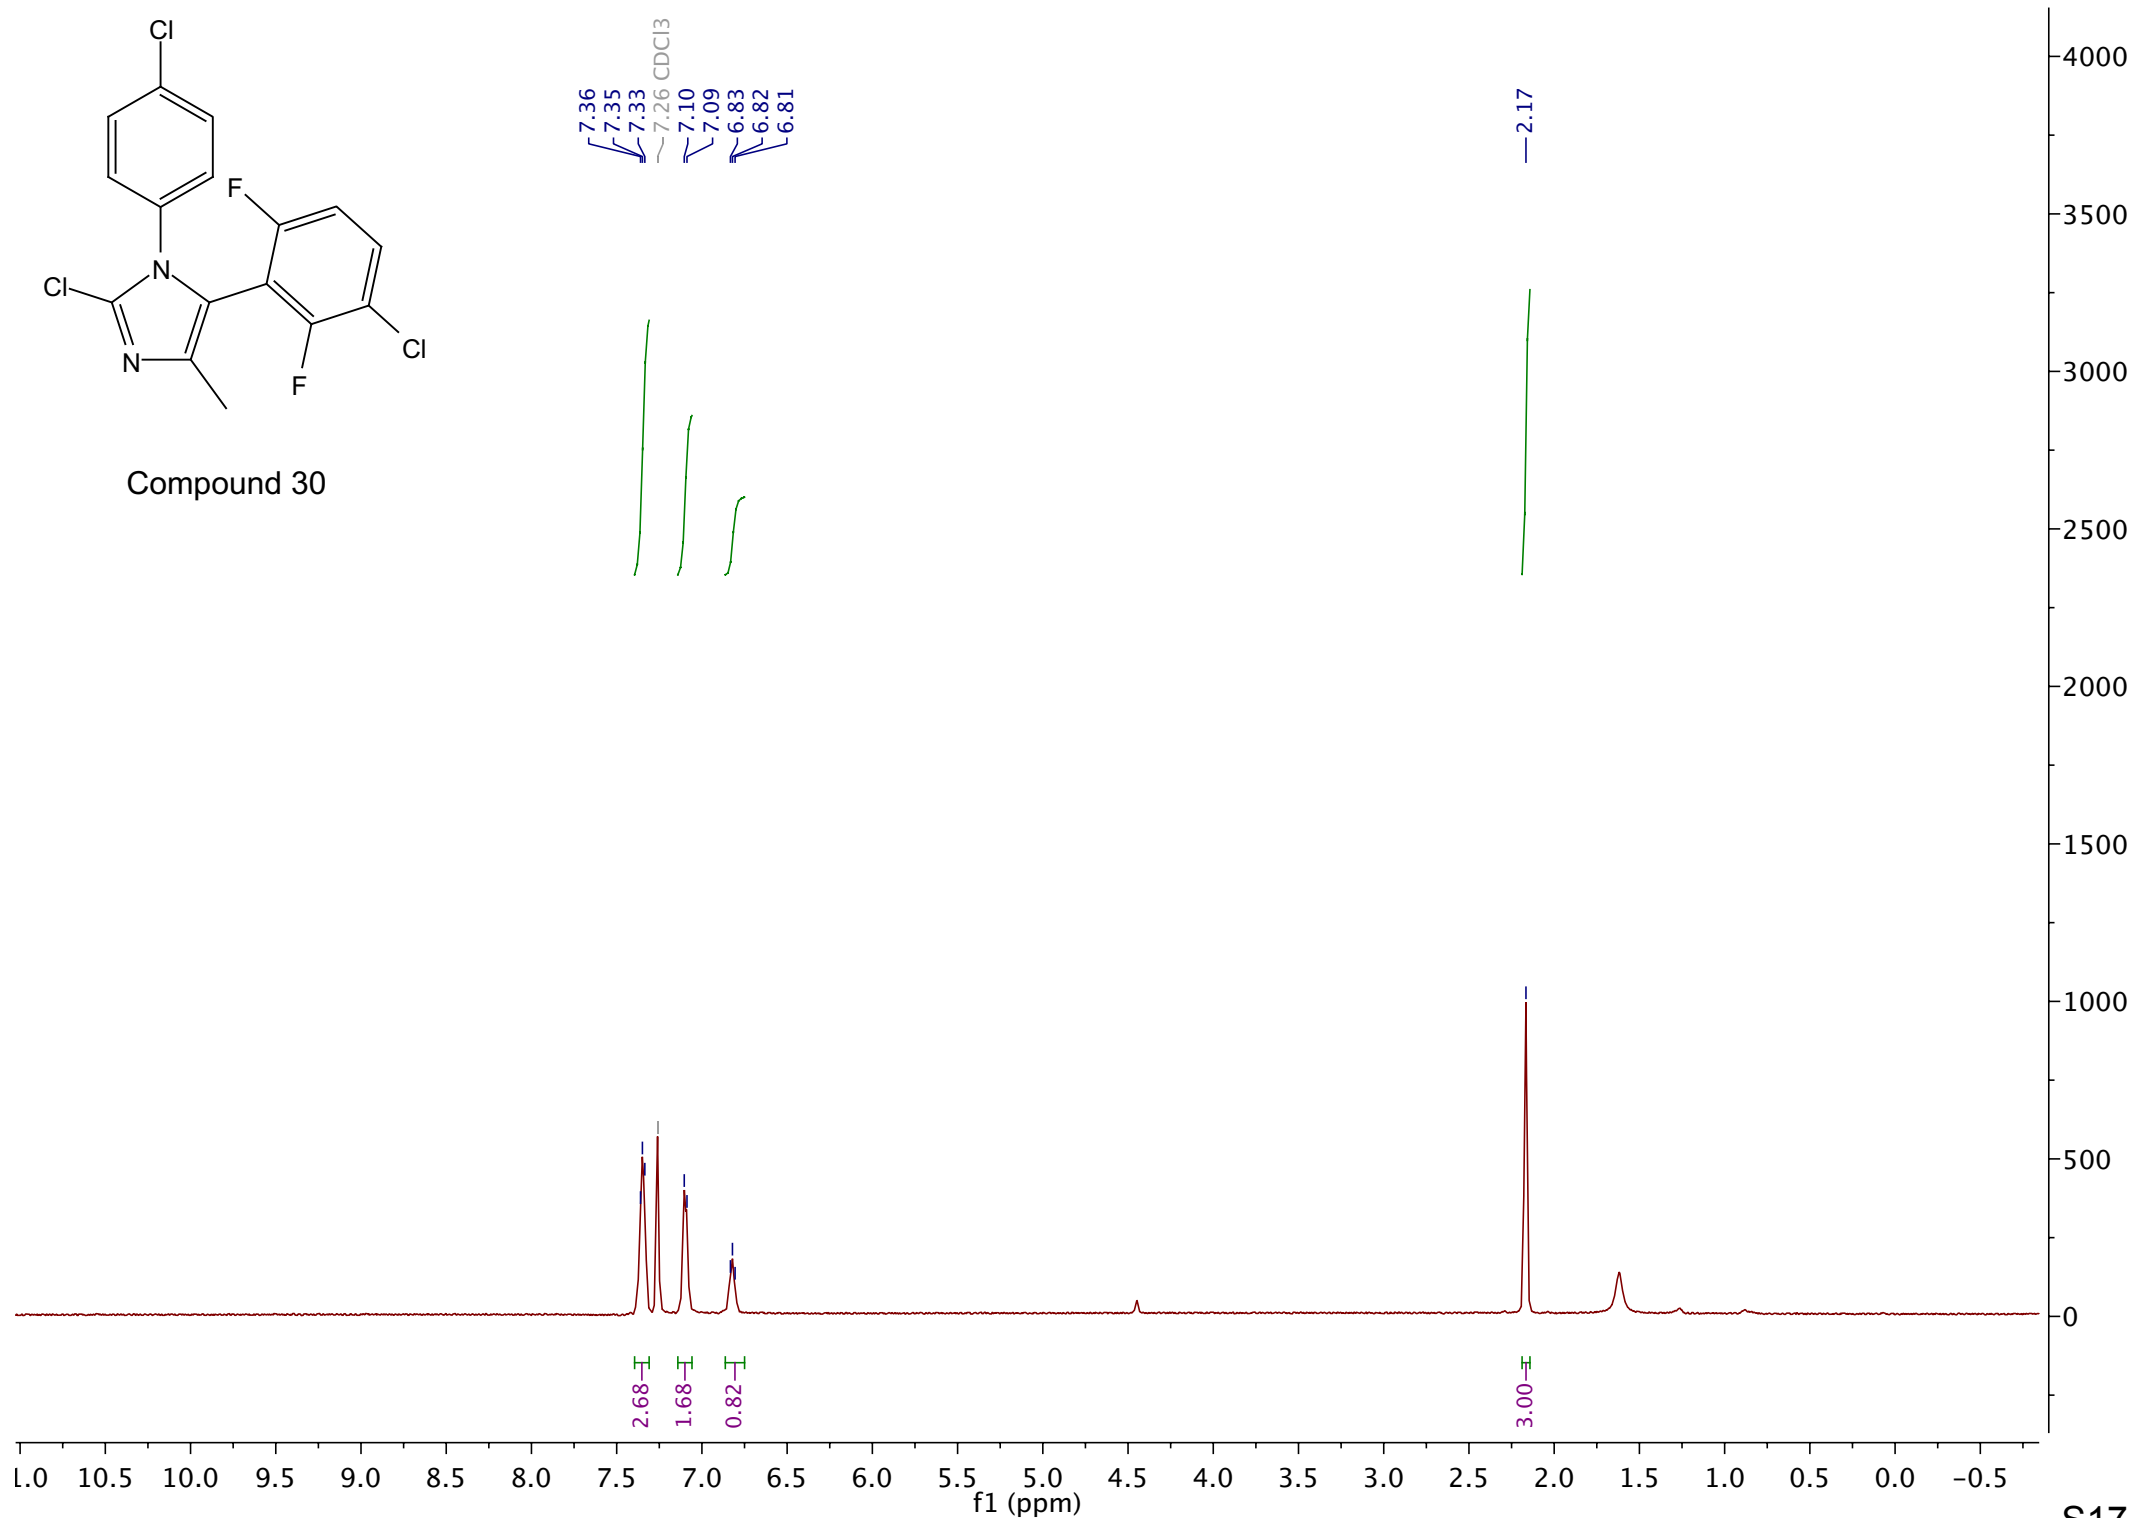

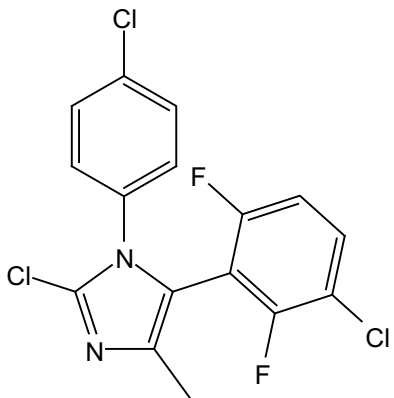

Compound 30

- 159.96
- 159.92
- 157.96
- 157.93
- 157.04
- 157.00
- 155.04
- 154.99
- 139.23
- 135.37
- 133.57
- 133.48
- 131.78
- 131.70
- 129.61
- 128.57
- 117.71
- 117.25
- 117.22
- 117.10
- 117.07
- 112.34
- 112.31
- 112.15
- 112.12
- 108.73
- 108.57
- 108.40

77.16 CDCl<sub>3</sub>

13.43

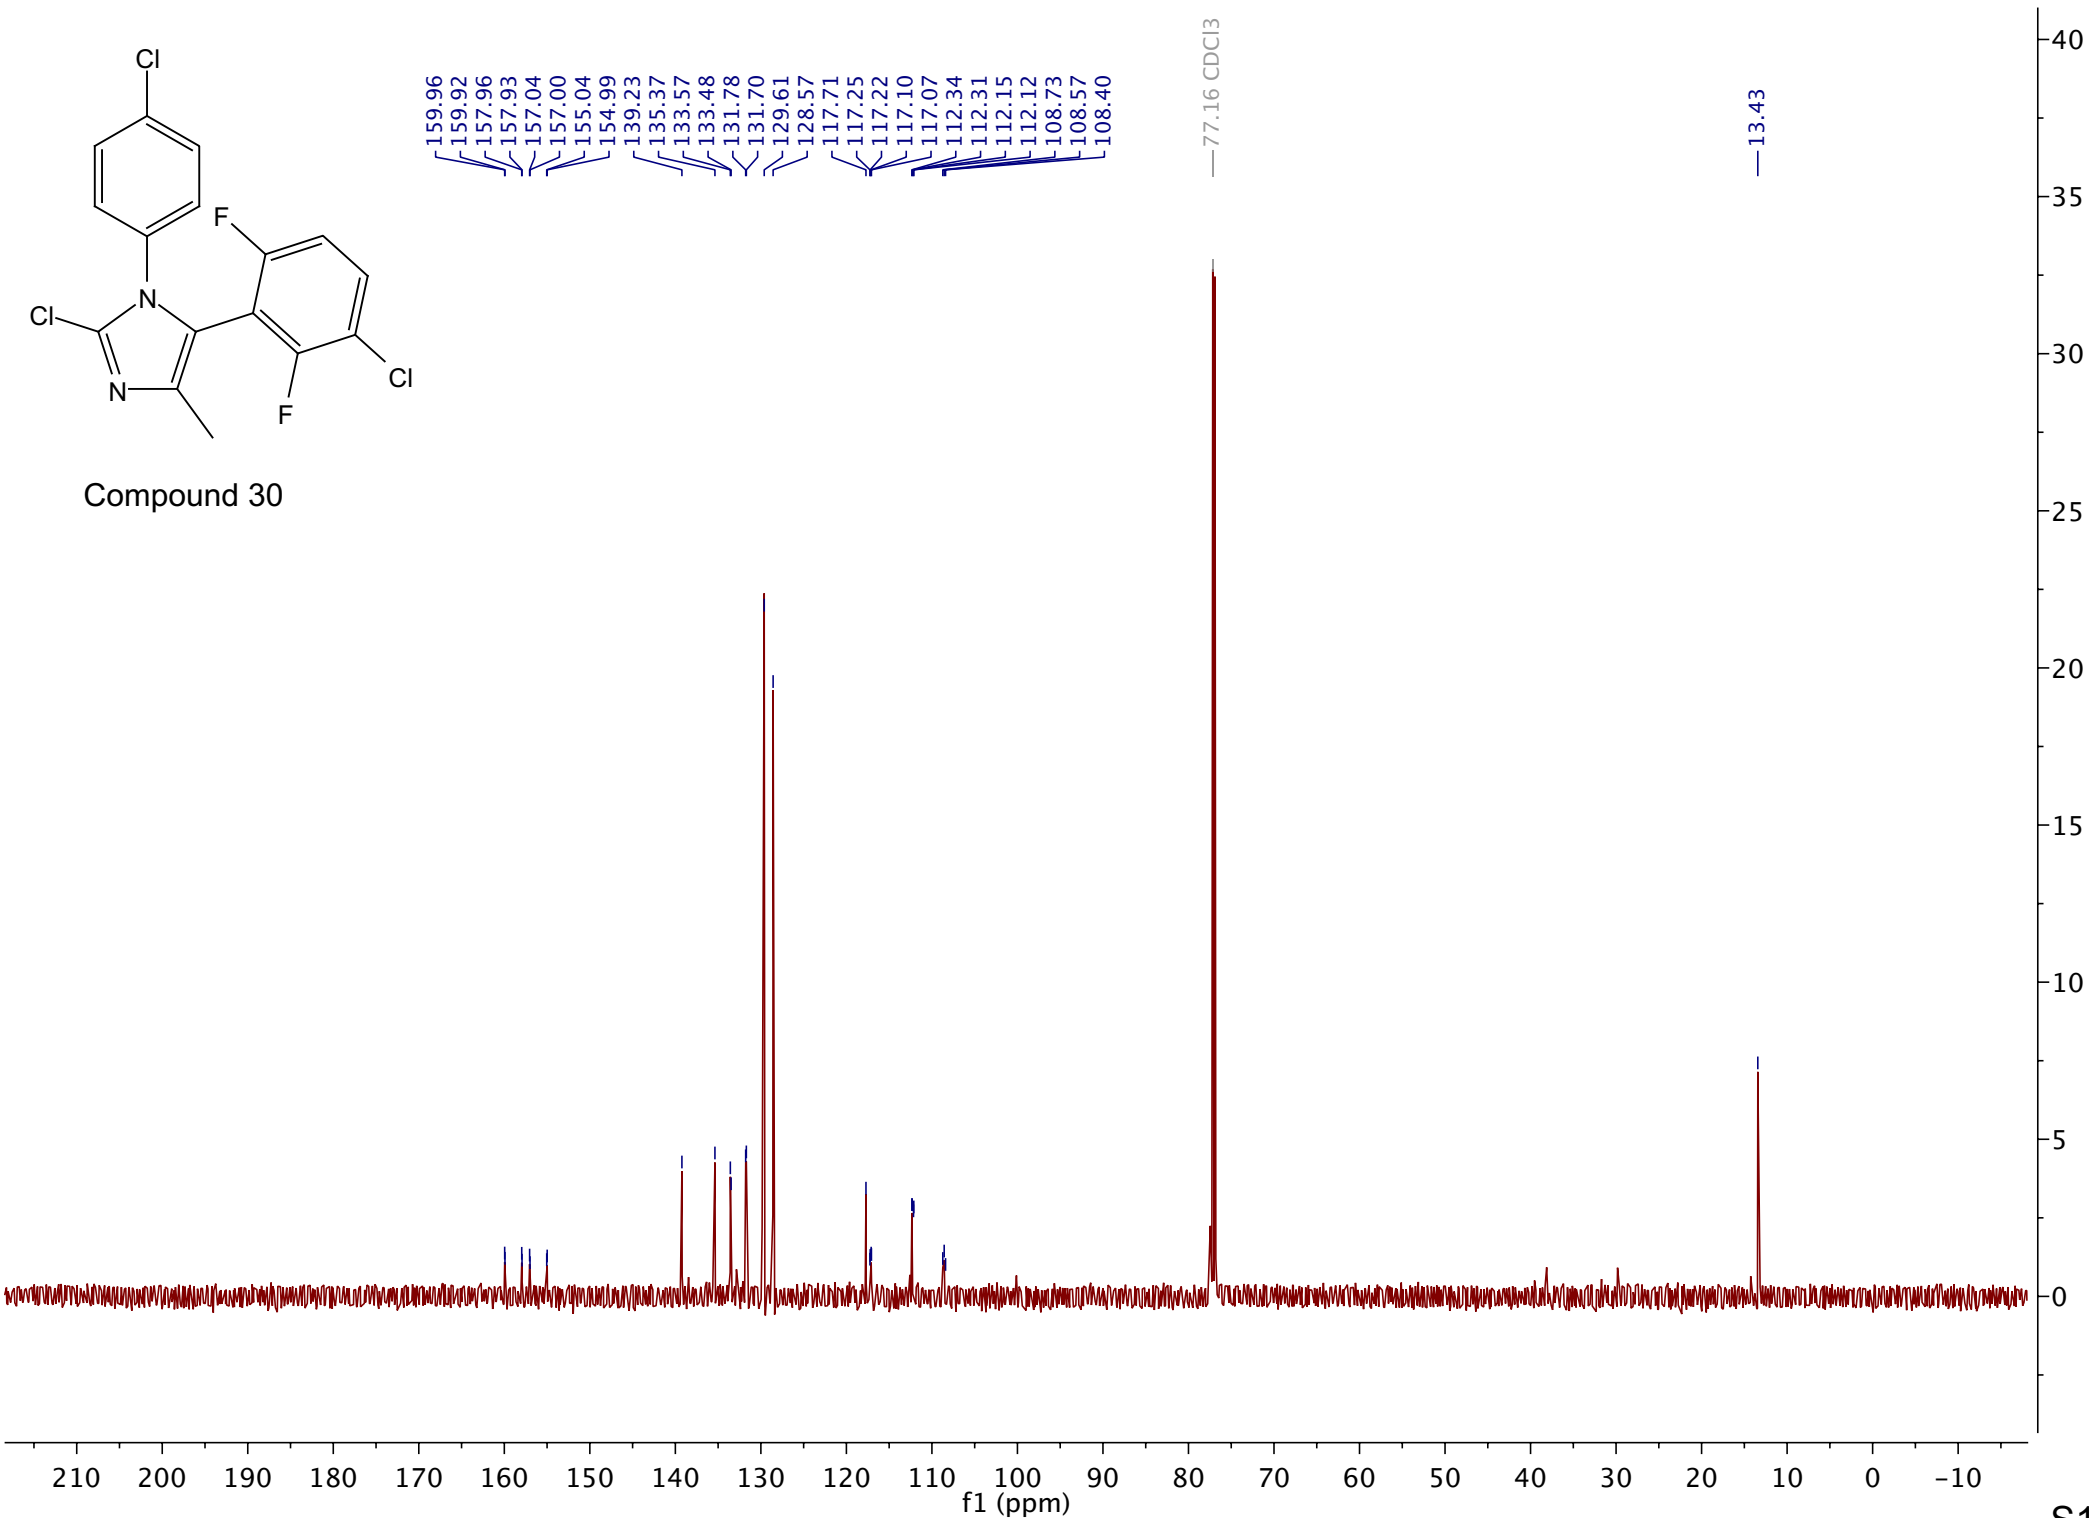

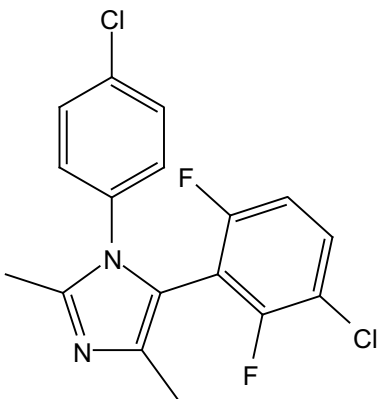

Compound 31

7.32  
7.32  
7.31  
7.31  
7.29  
7.29  
7.28  
7.26 CDCl<sub>3</sub>  
7.04  
7.03  
6.80  
6.80  
6.78  
6.78  
6.77  
6.76

2.29  
2.14

1.24

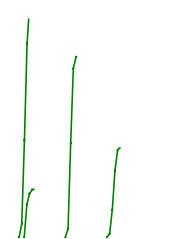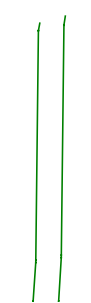

H grease

2.44  
0.54  
2.02  
1.00

3.11  
3.19

11.0 10.5 10.0 9.5 9.0 8.5 8.0 7.5 7.0 6.5 6.0 5.5 5.0 4.5 4.0 3.5 3.0 2.5 2.0 1.5 1.0 0.5 0.0 -0.5

f1 (ppm)

S19

21000  
20000  
19000  
18000  
17000  
16000  
15000  
14000  
13000  
12000  
11000  
10000  
9000  
8000  
7000  
6000  
5000  
4000  
3000  
2000  
1000  
0  
-1000

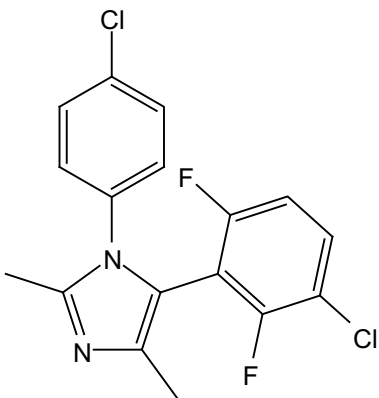

Compound 31

160.00  
159.96  
158.01  
157.97  
157.04  
156.99  
155.04  
154.99  
146.28  
138.04  
135.07  
134.66  
131.03  
130.96  
129.62  
128.34  
117.05  
117.02  
116.90  
116.87  
115.69  
112.16  
112.13  
111.97  
111.94  
109.77  
109.60  
109.44

77.16 CDCl<sub>3</sub>

29.82

14.04  
13.13

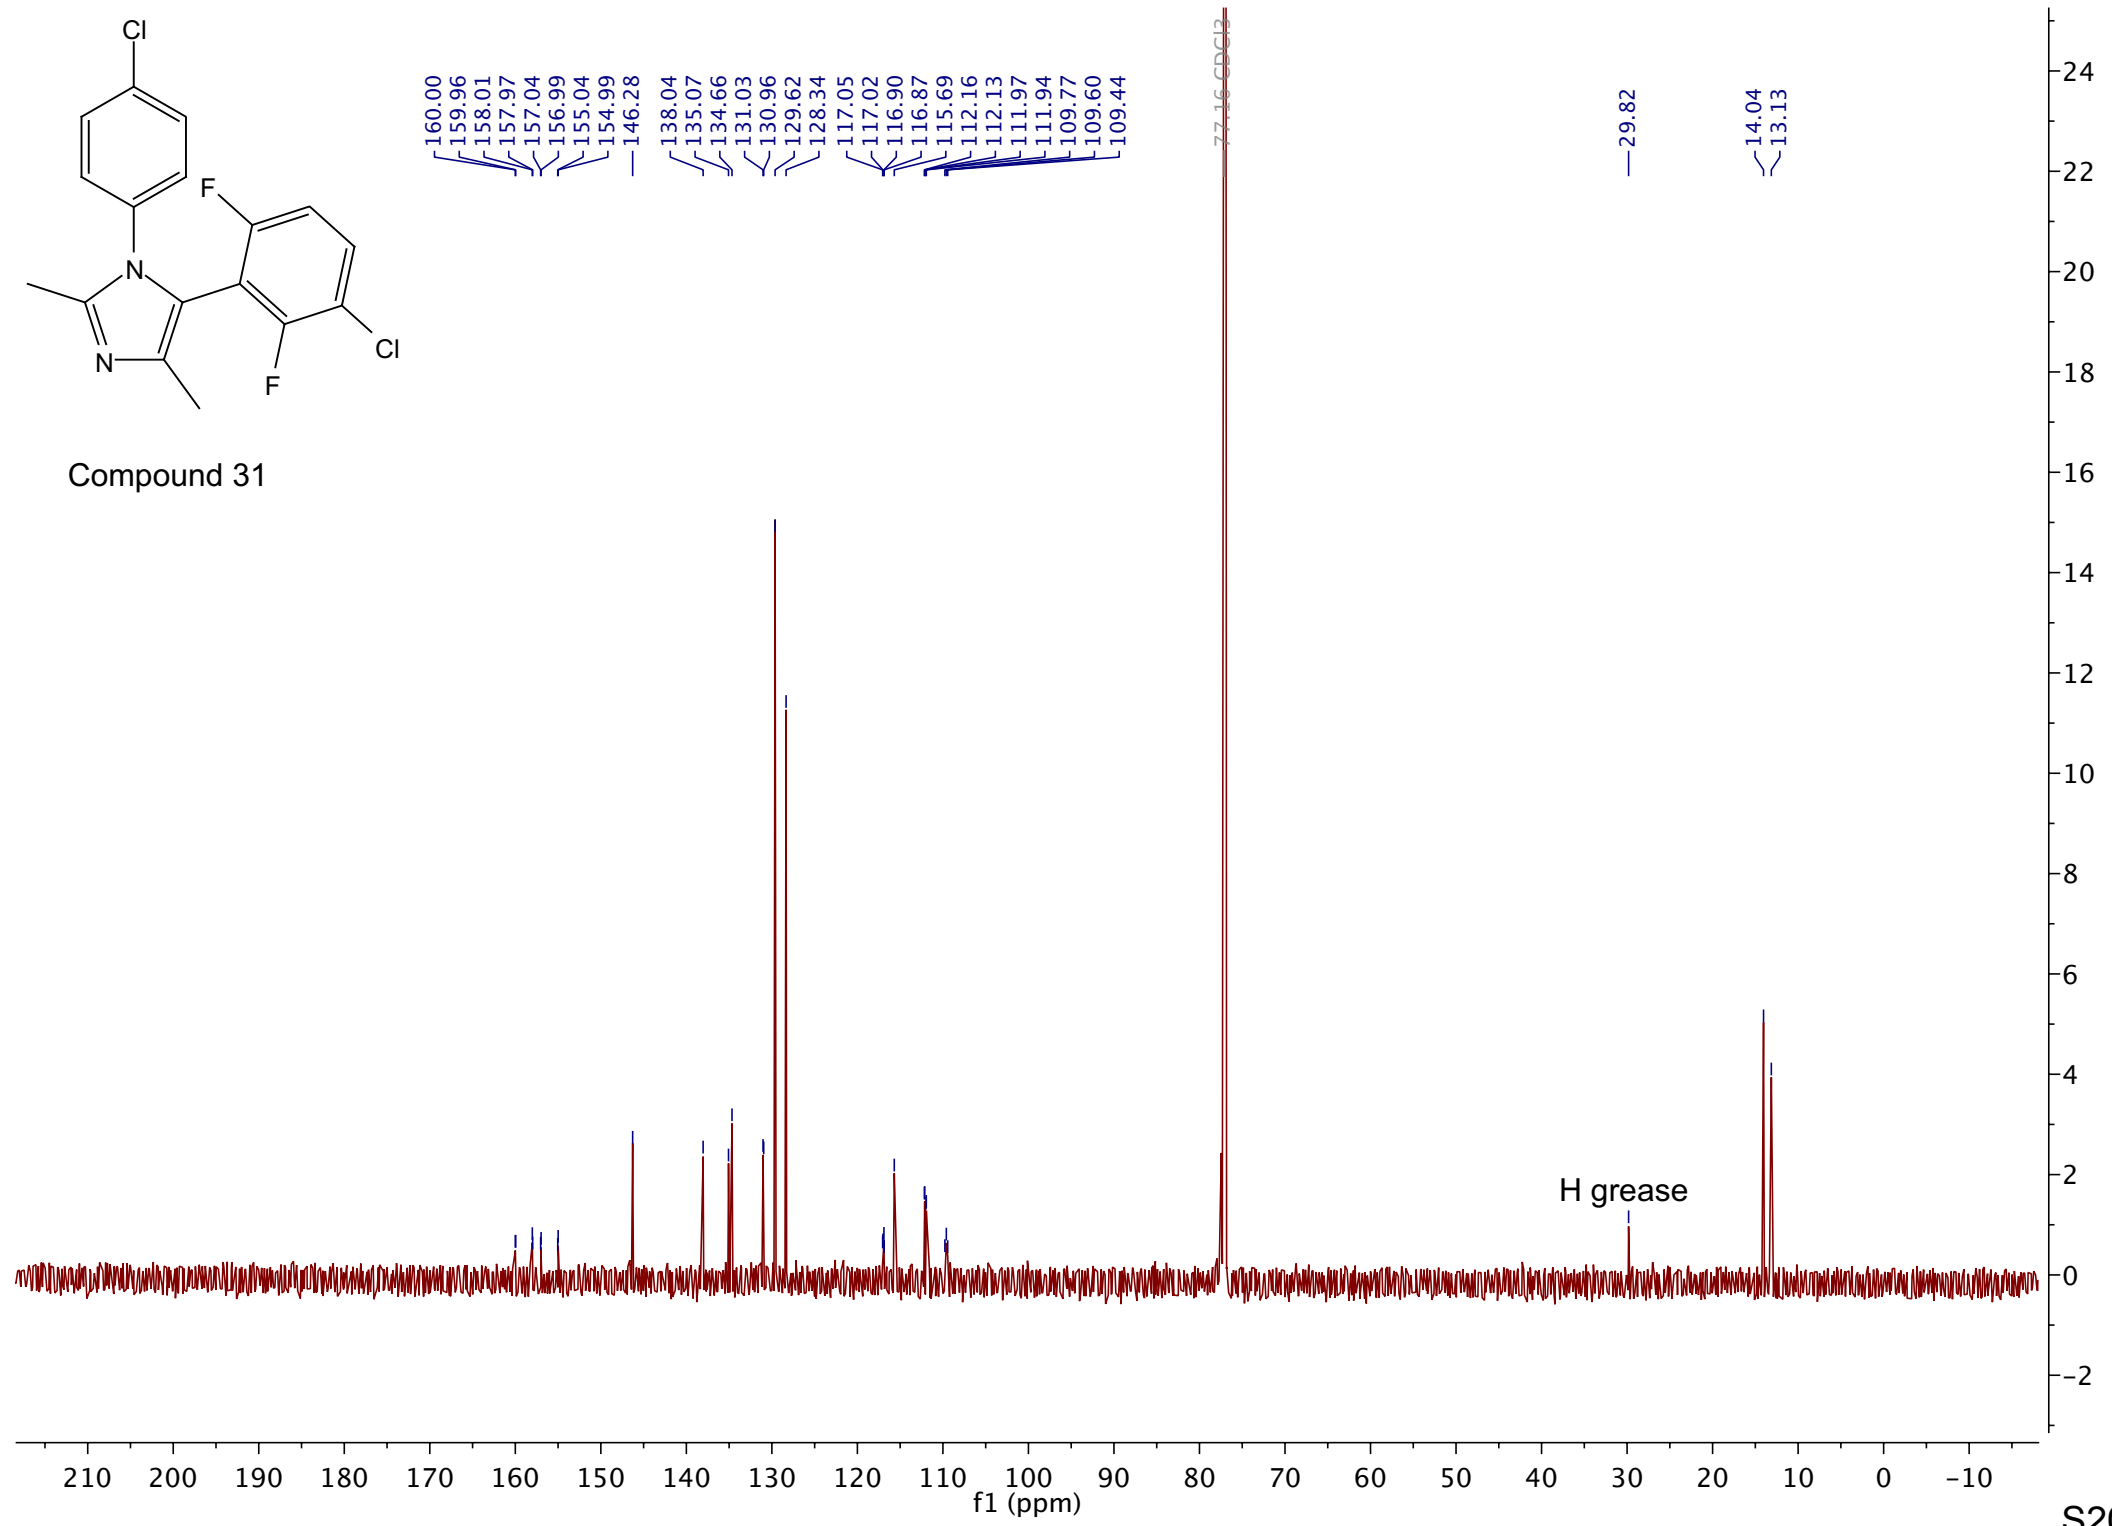

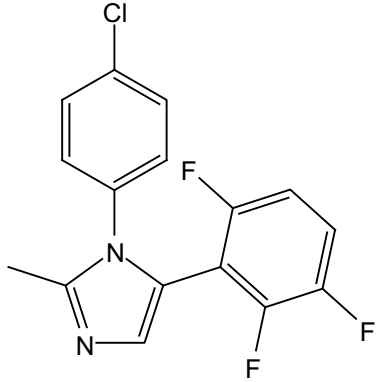

Compound 34

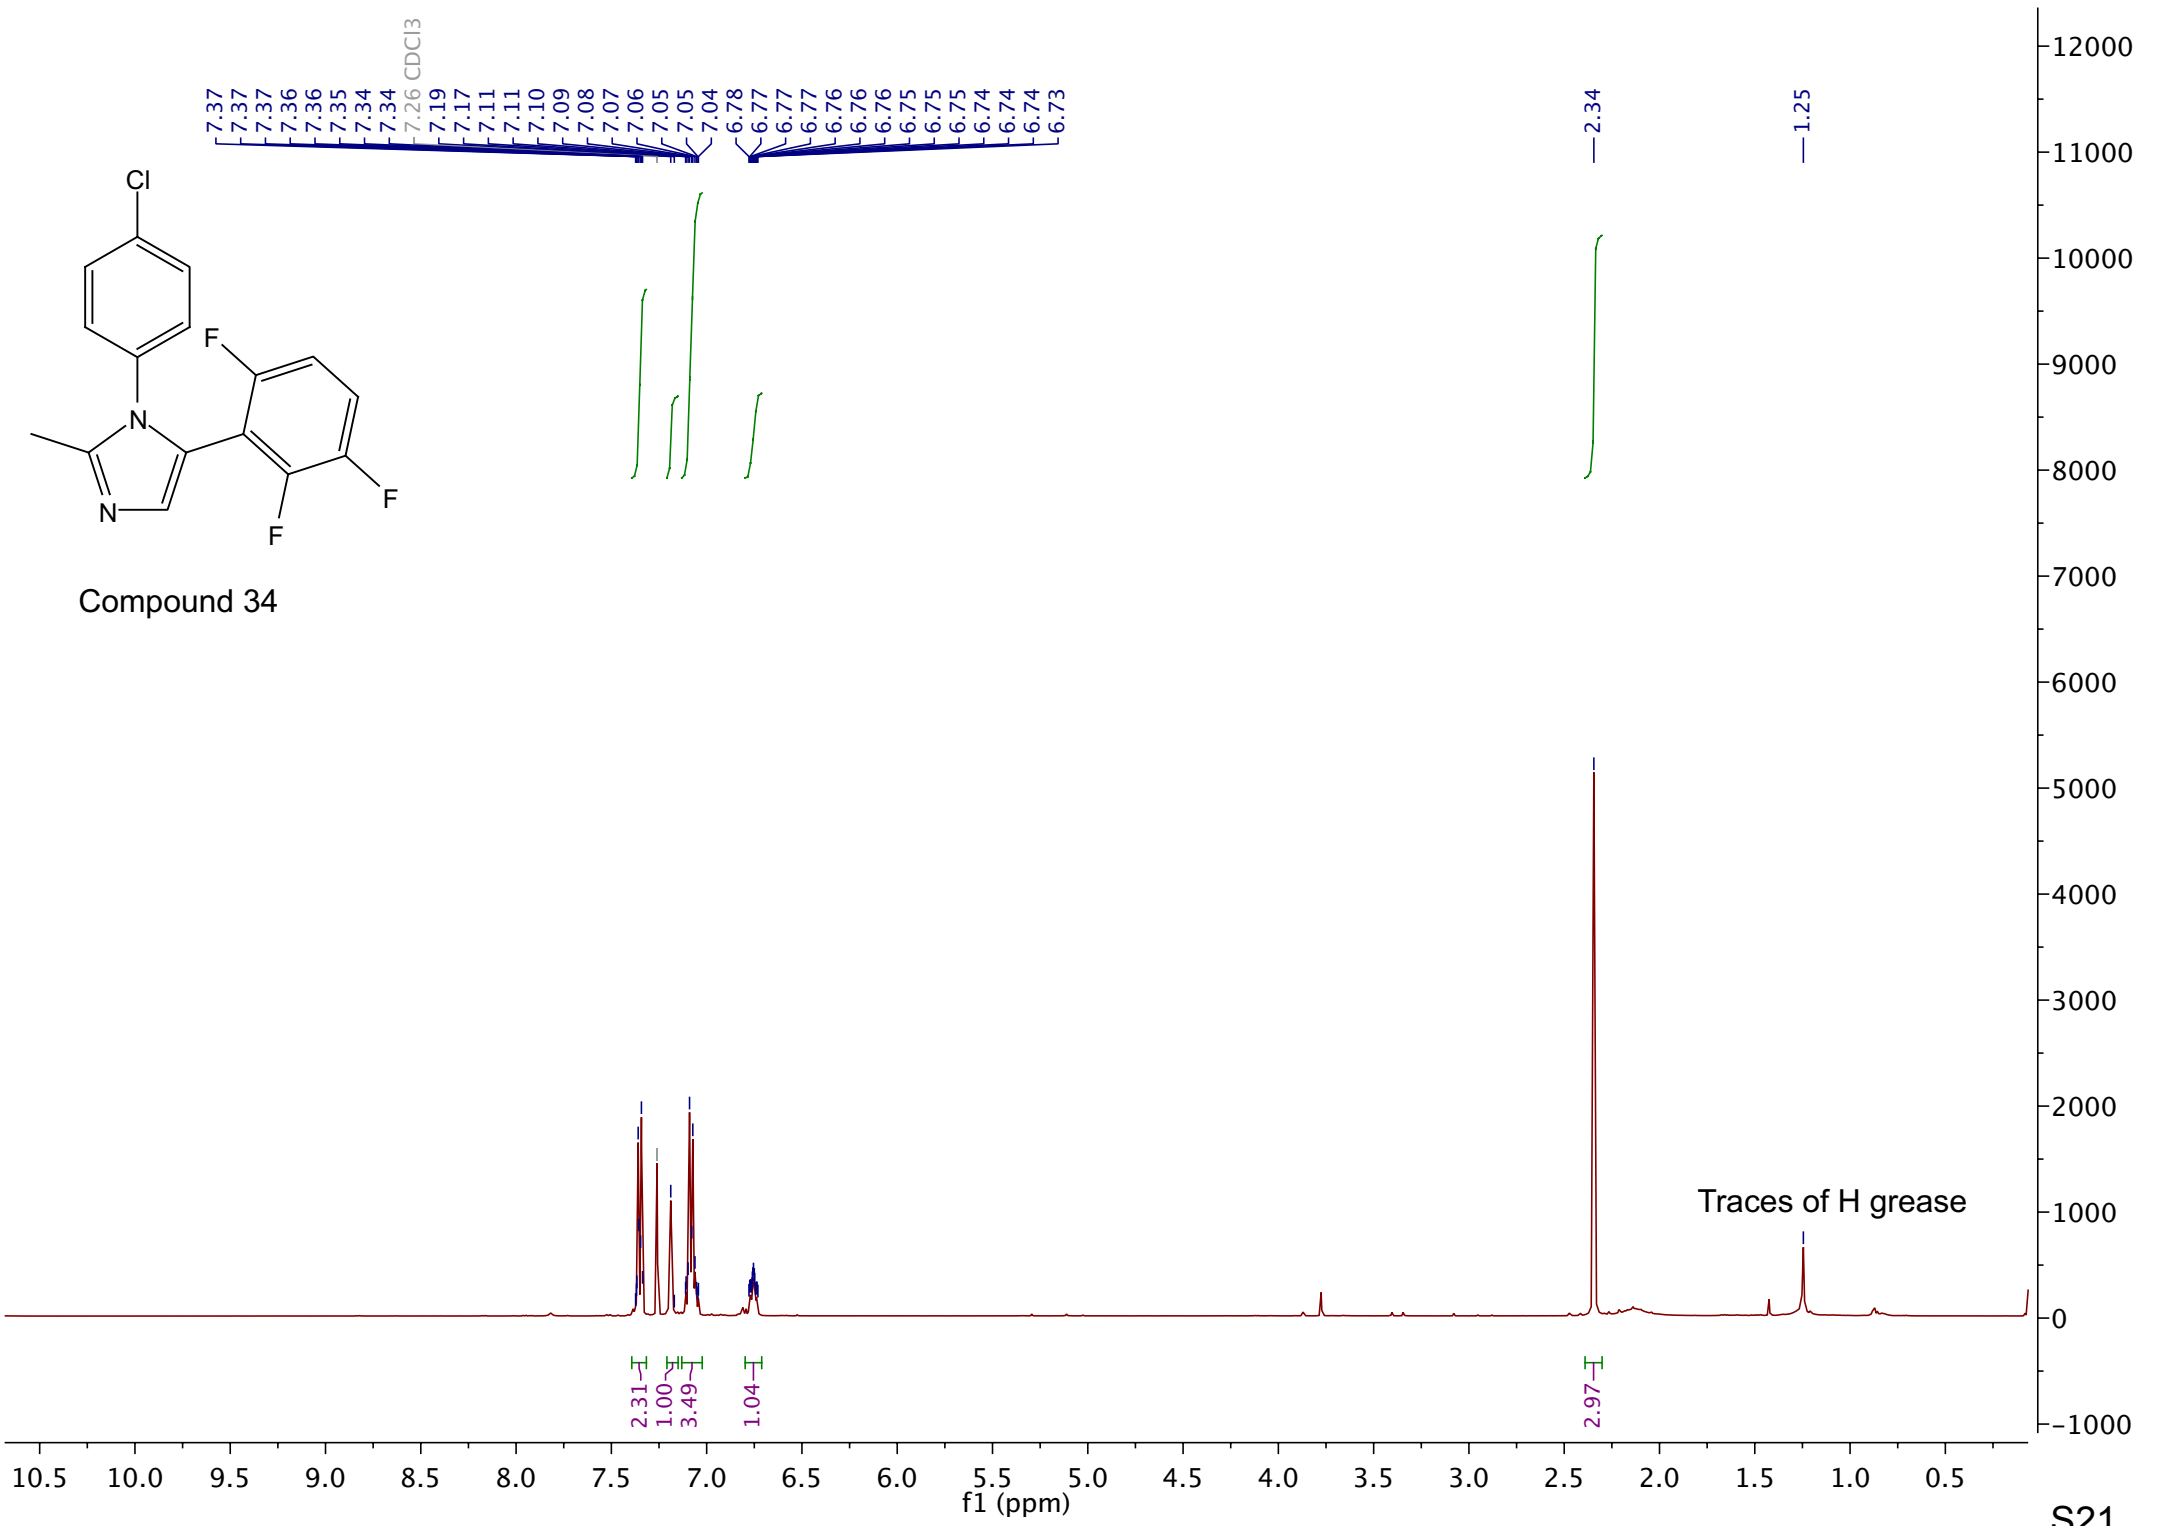

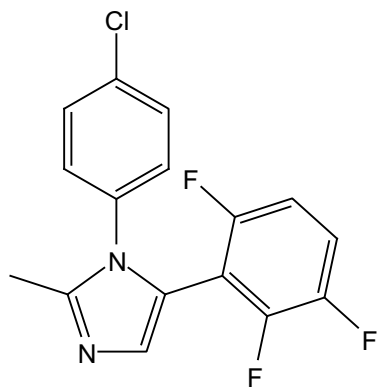

Compound 34

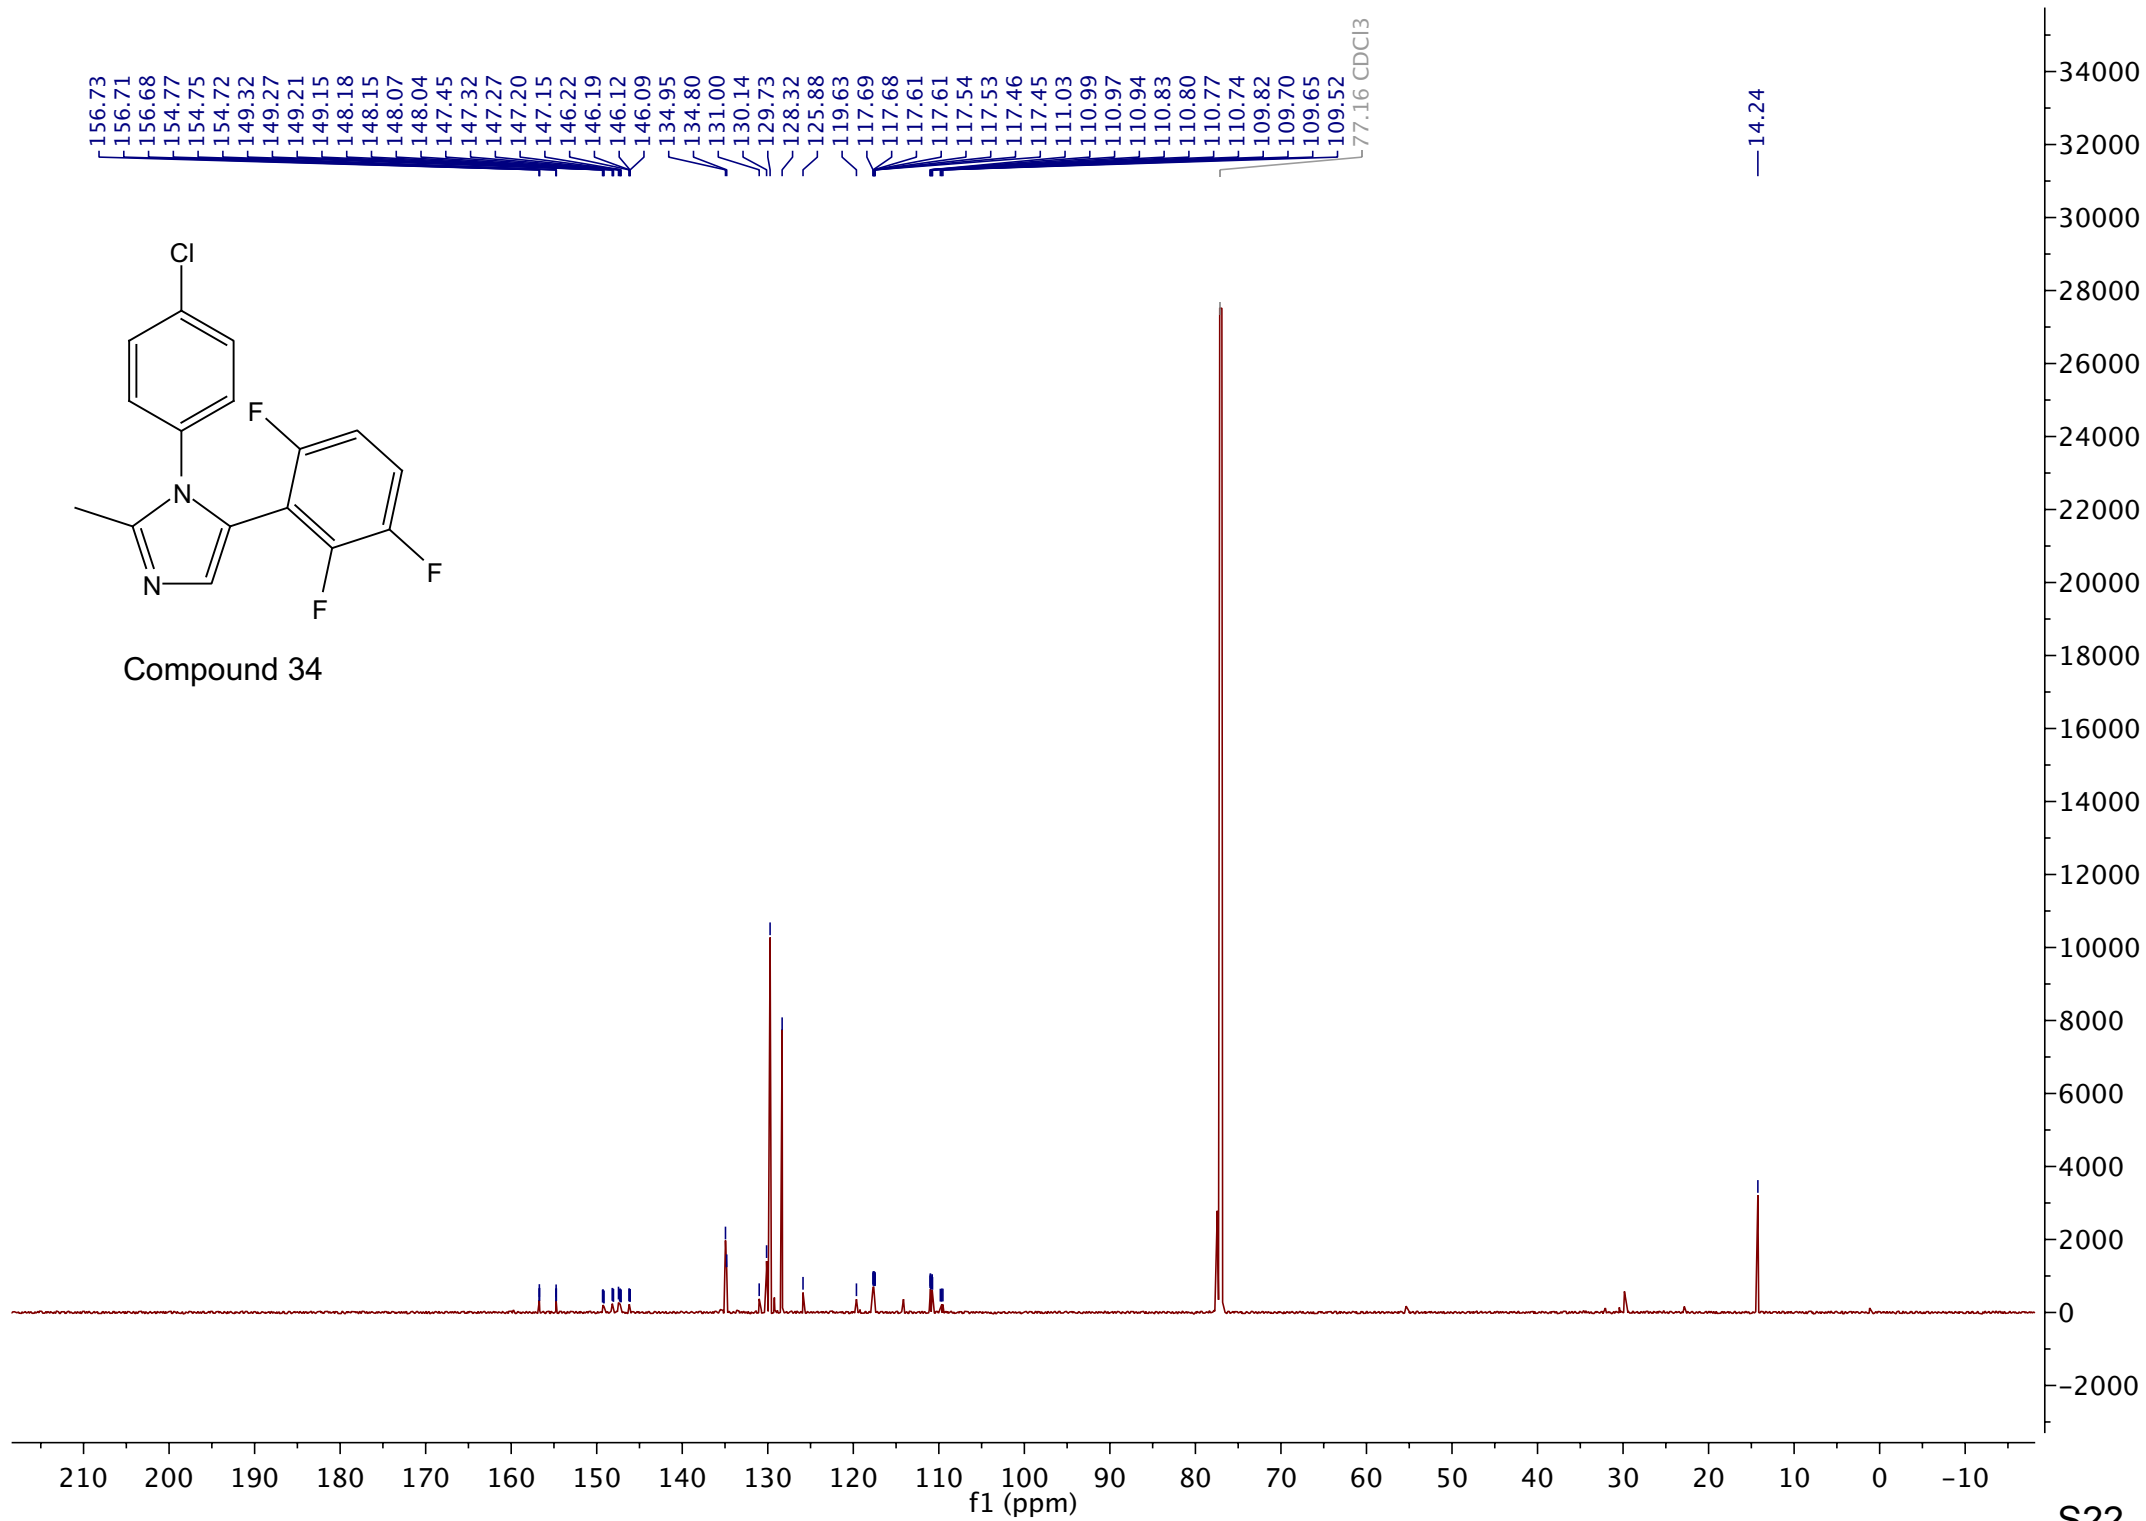

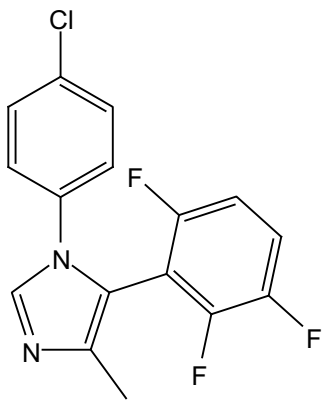

Compound 35

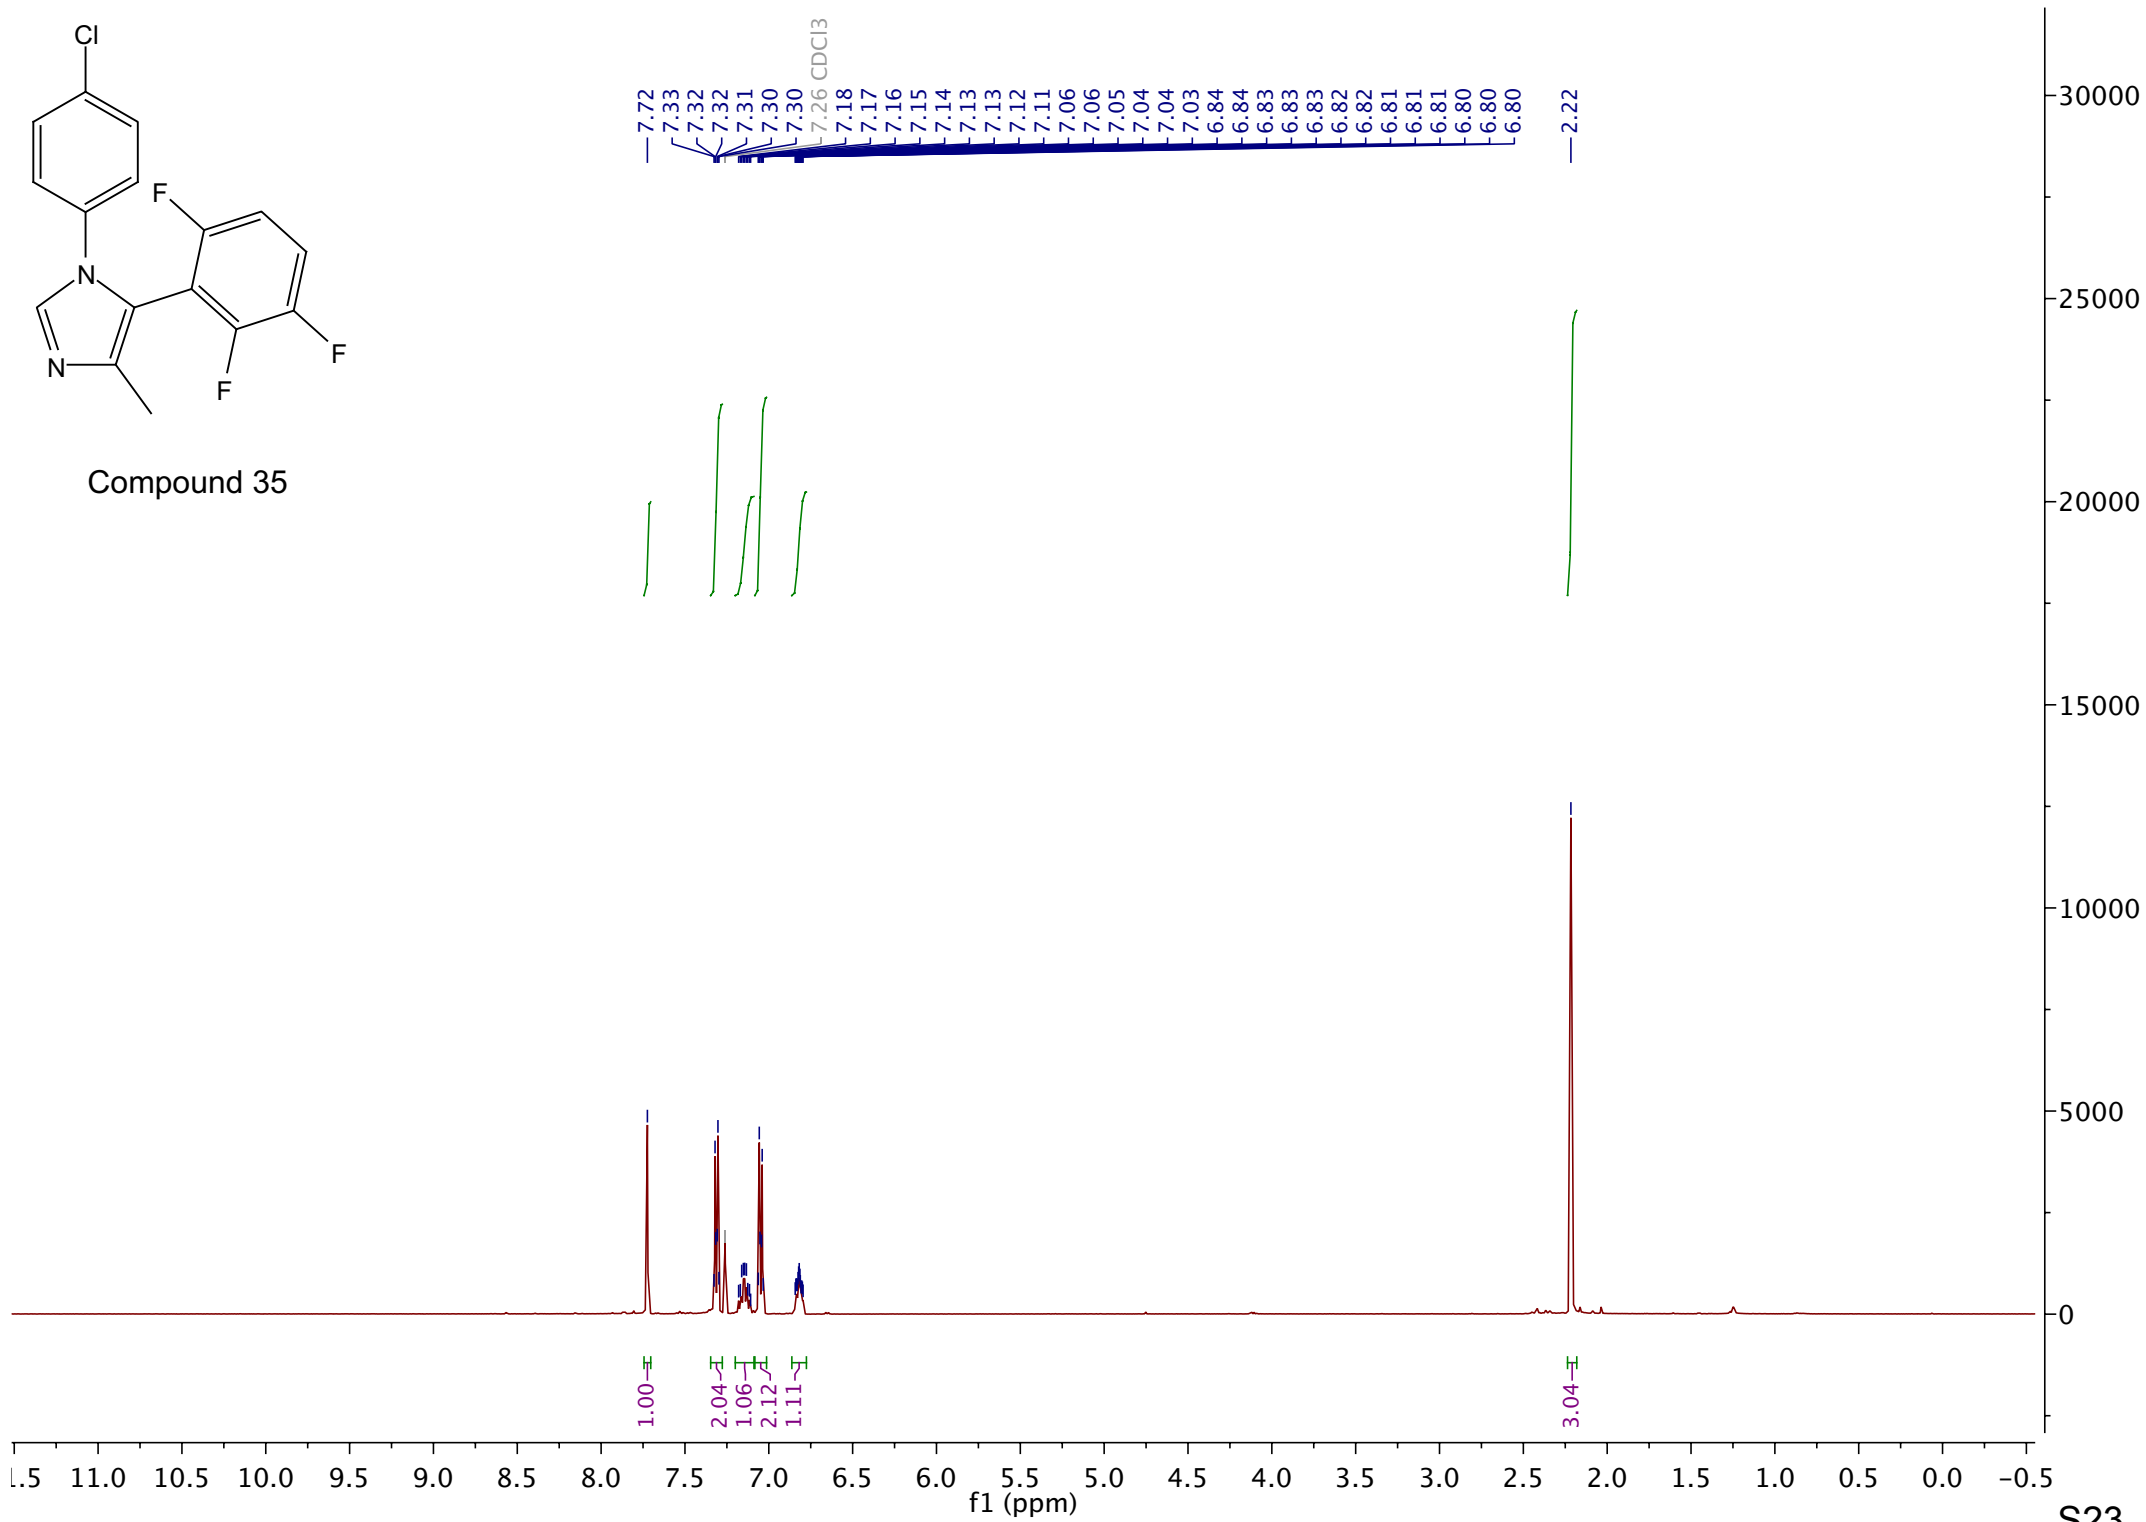

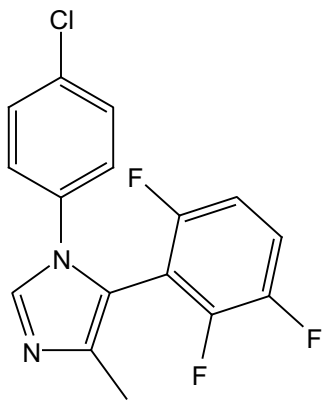

Compound 35

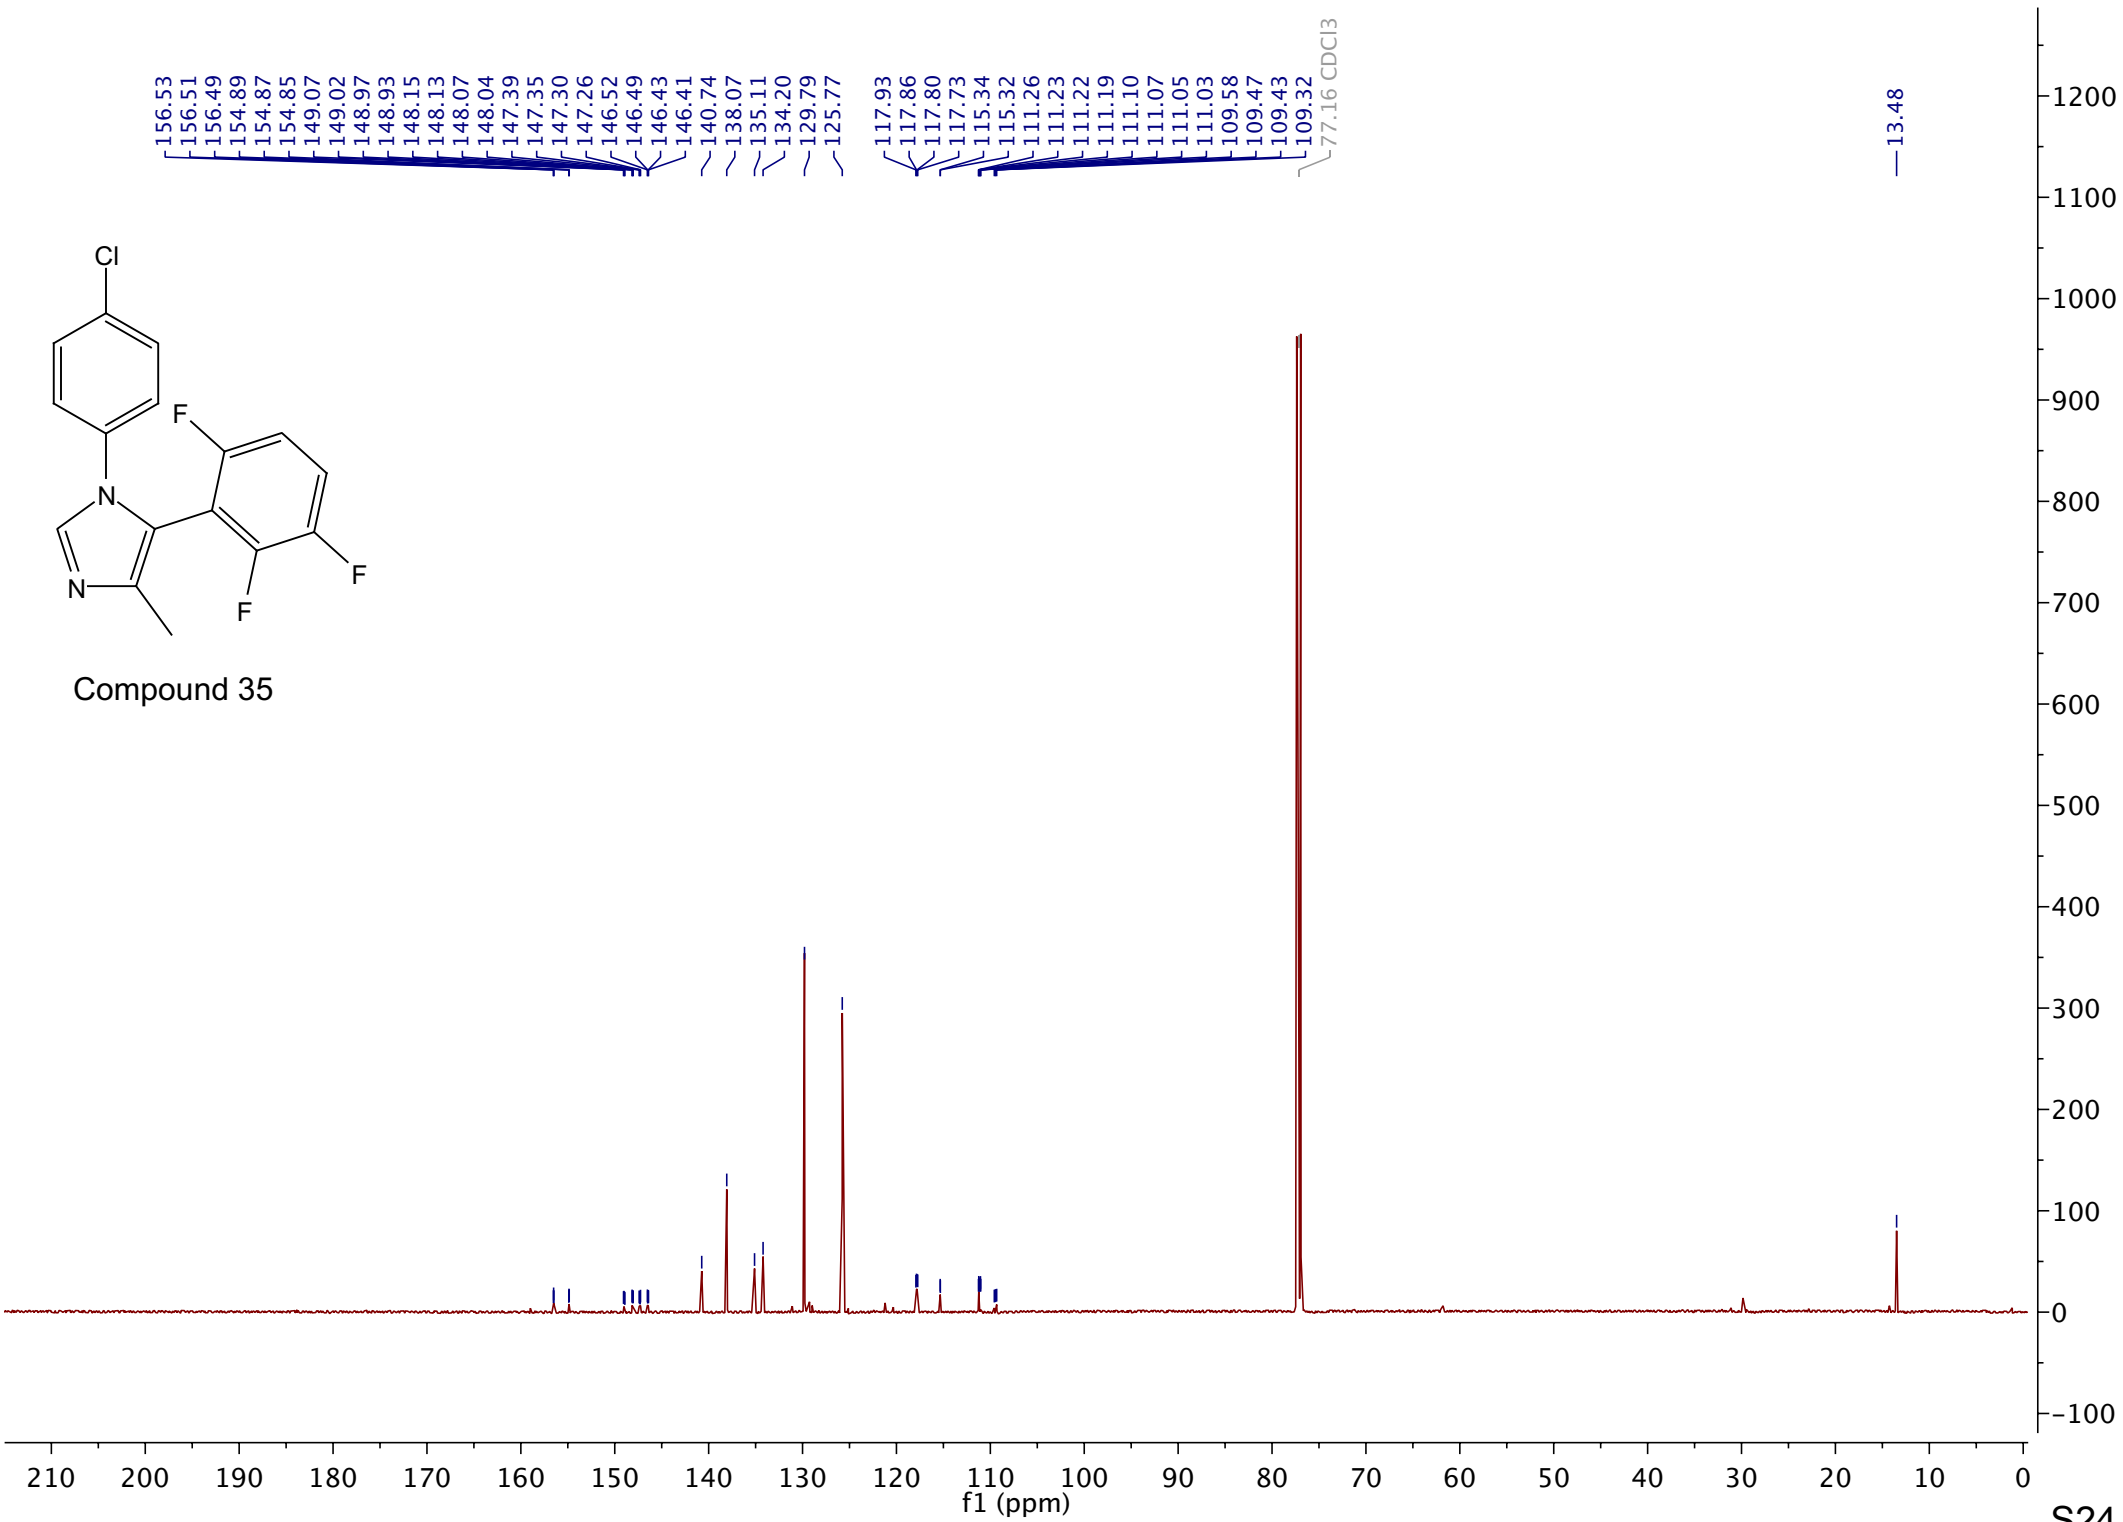



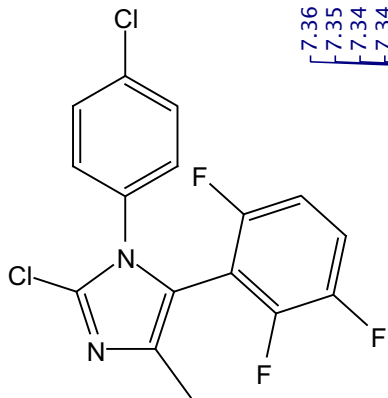

Compound 36

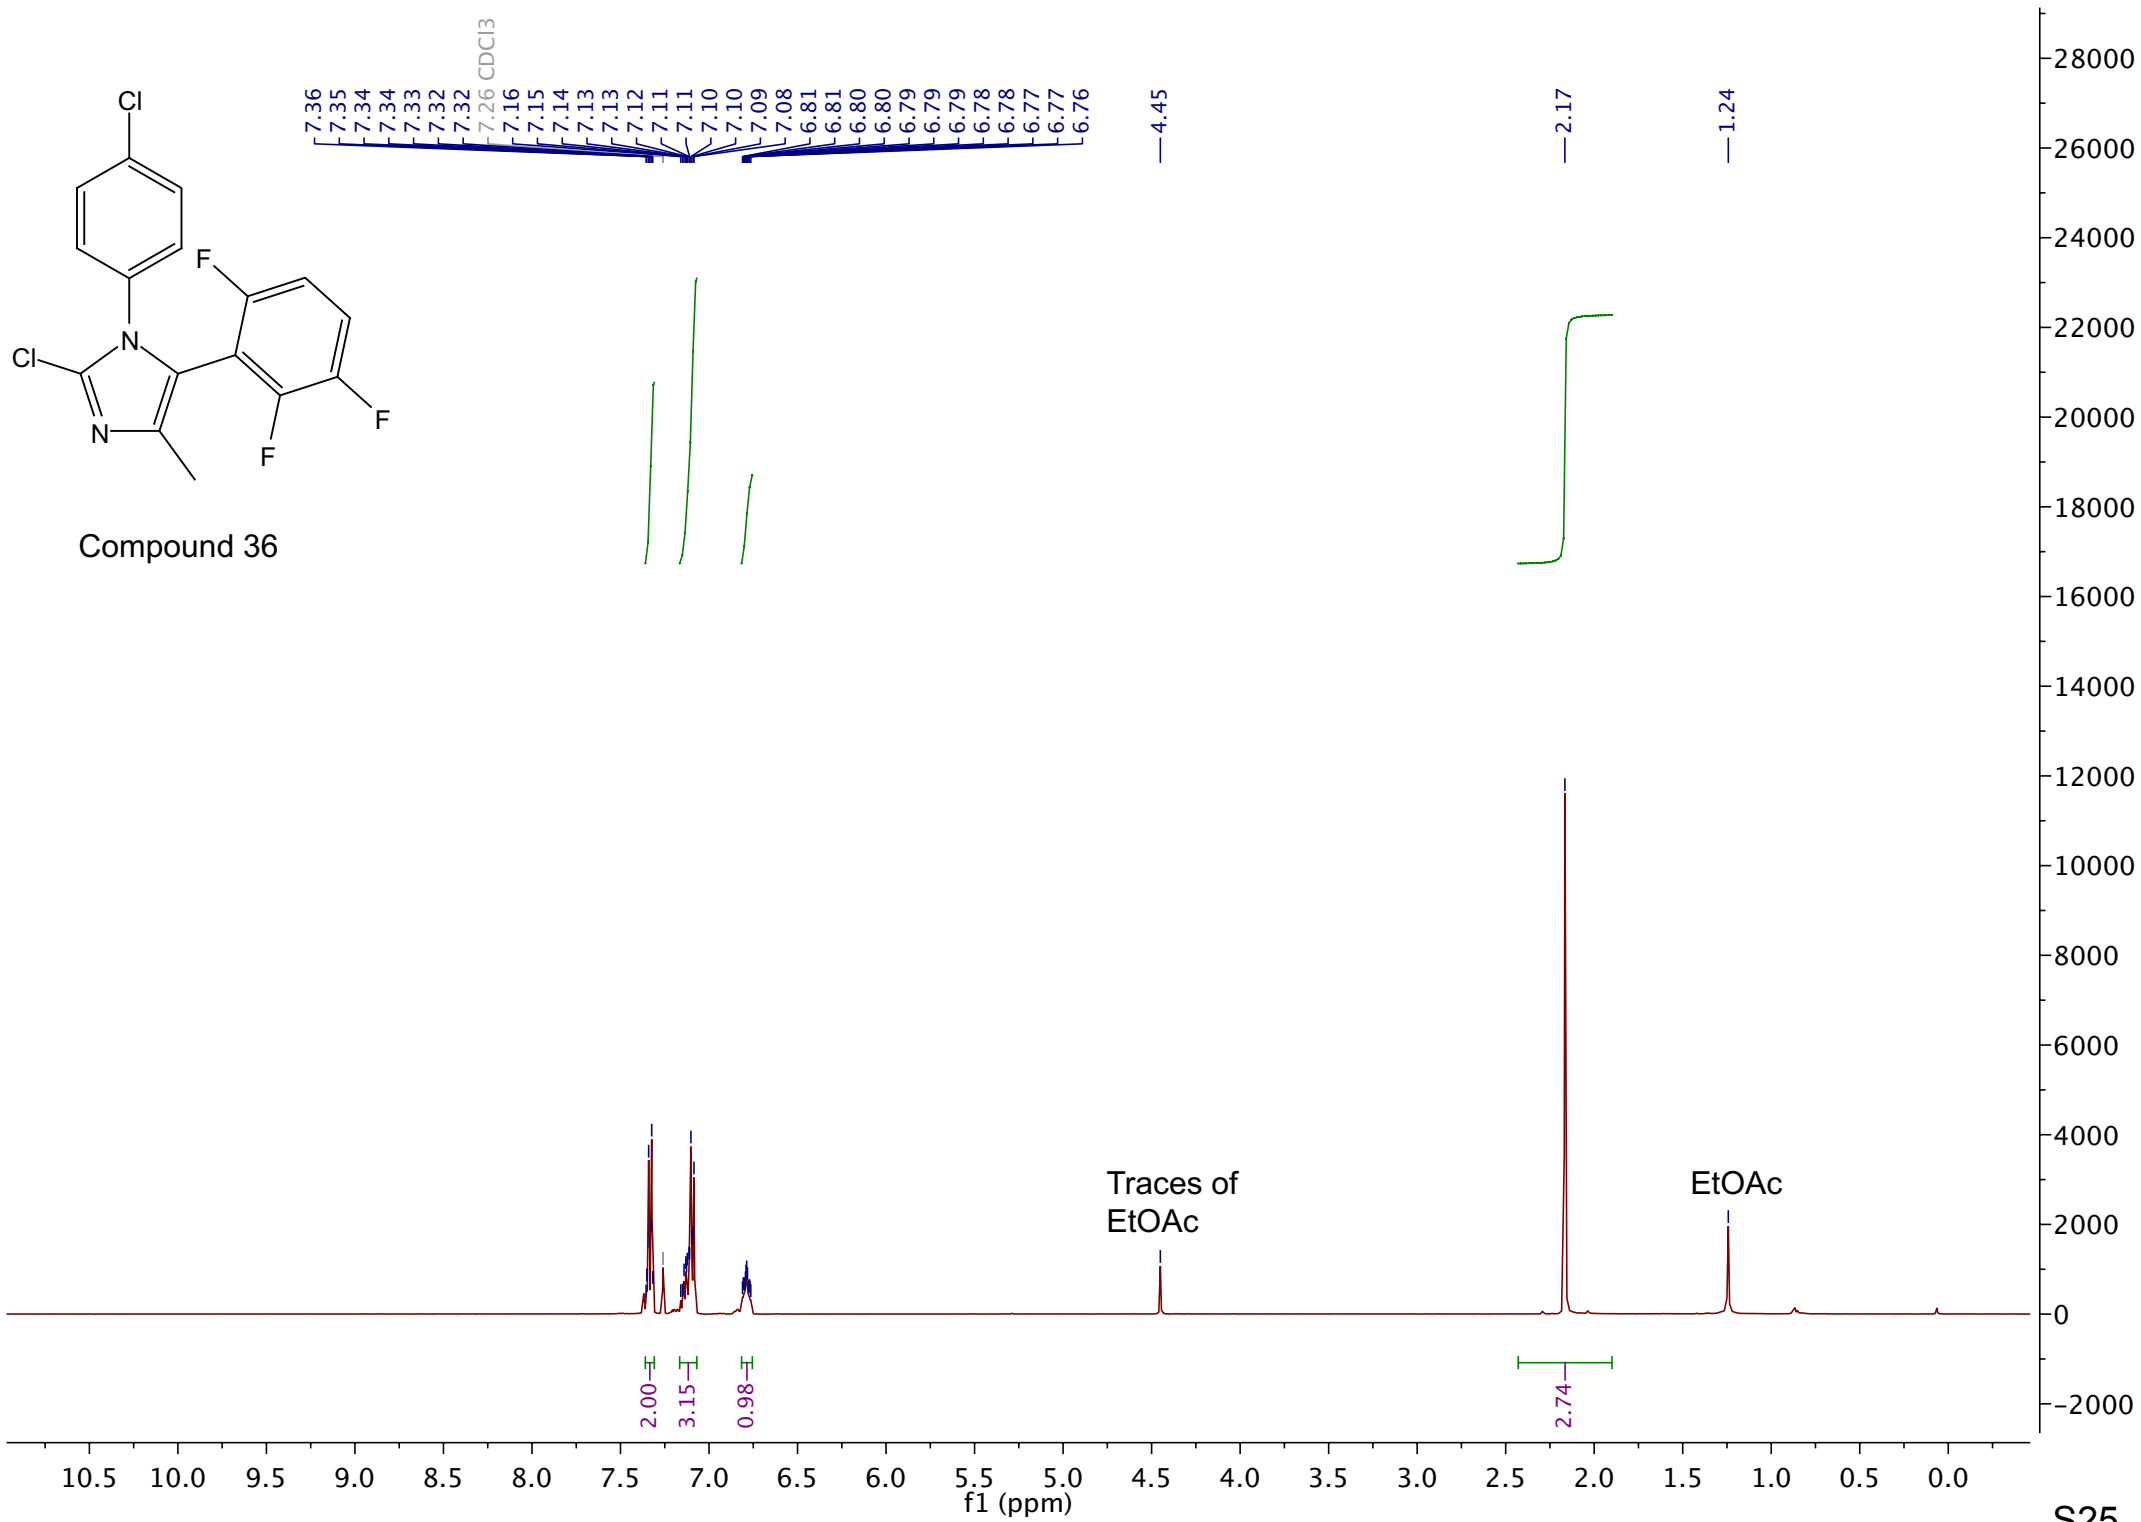

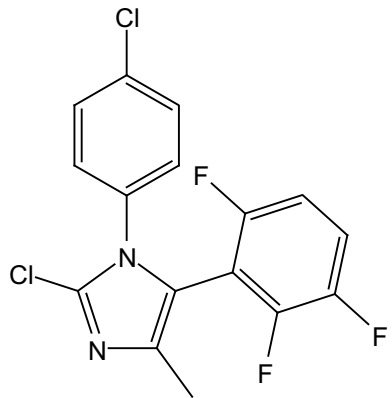

Compound 36

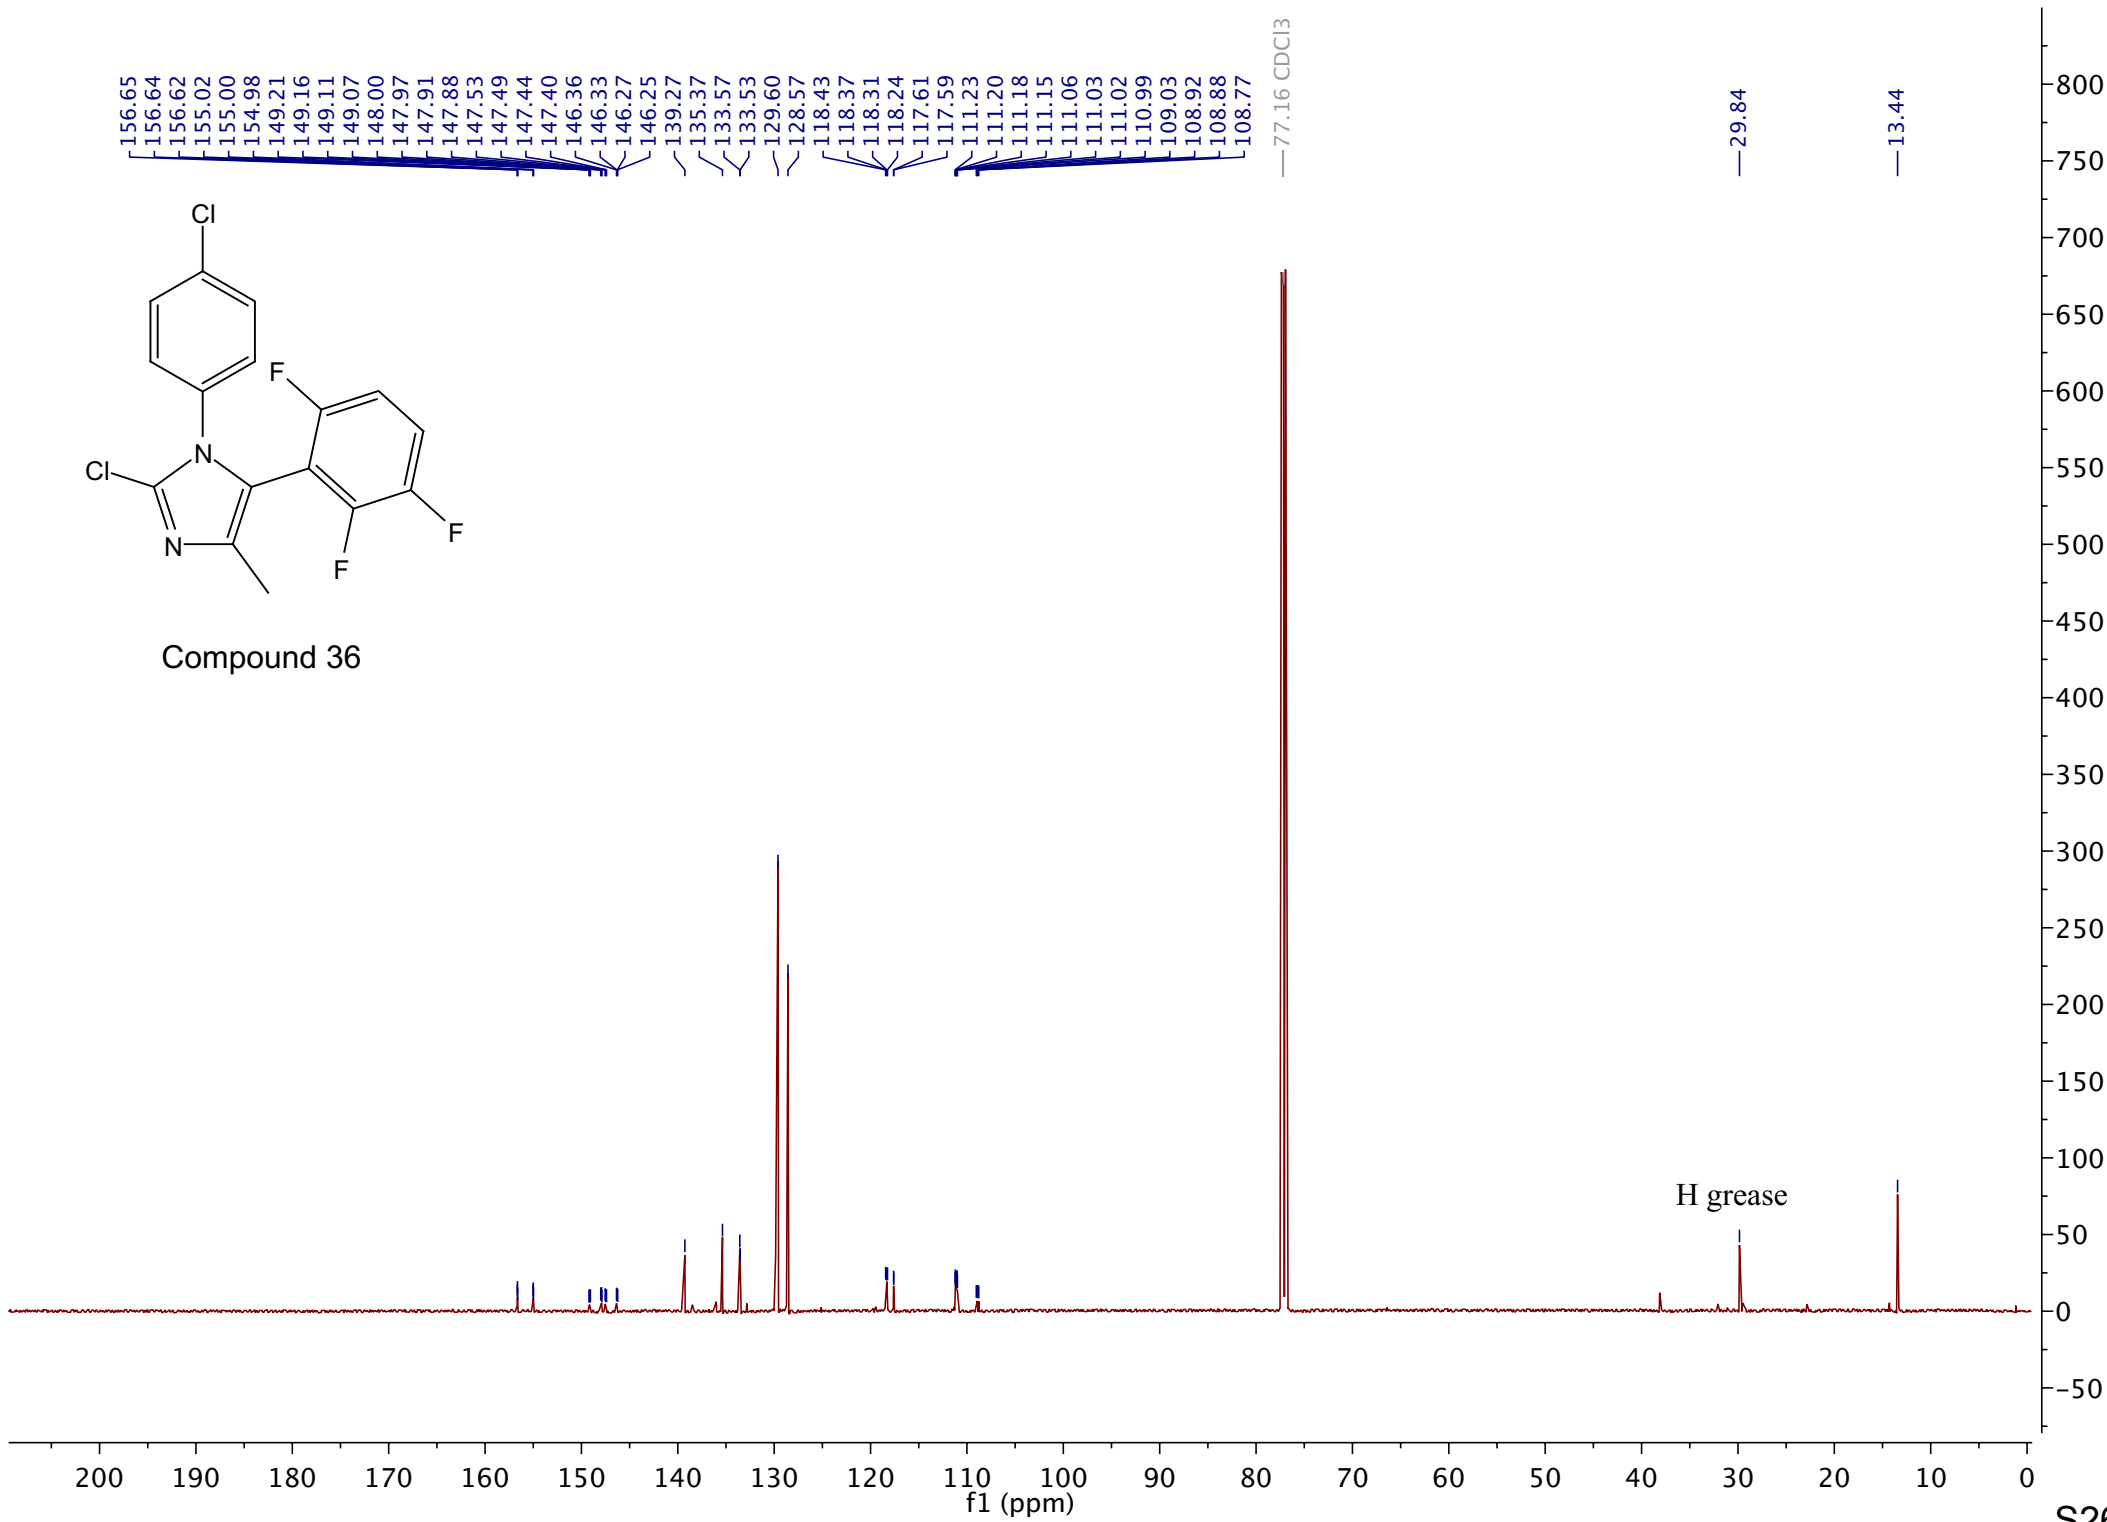

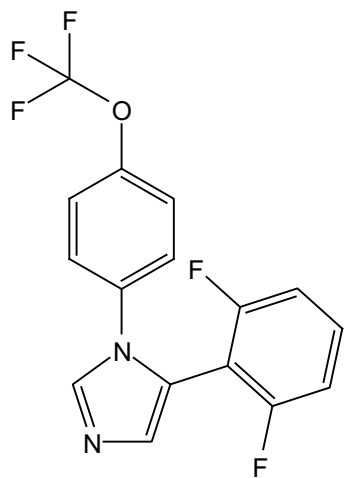

Compound 42

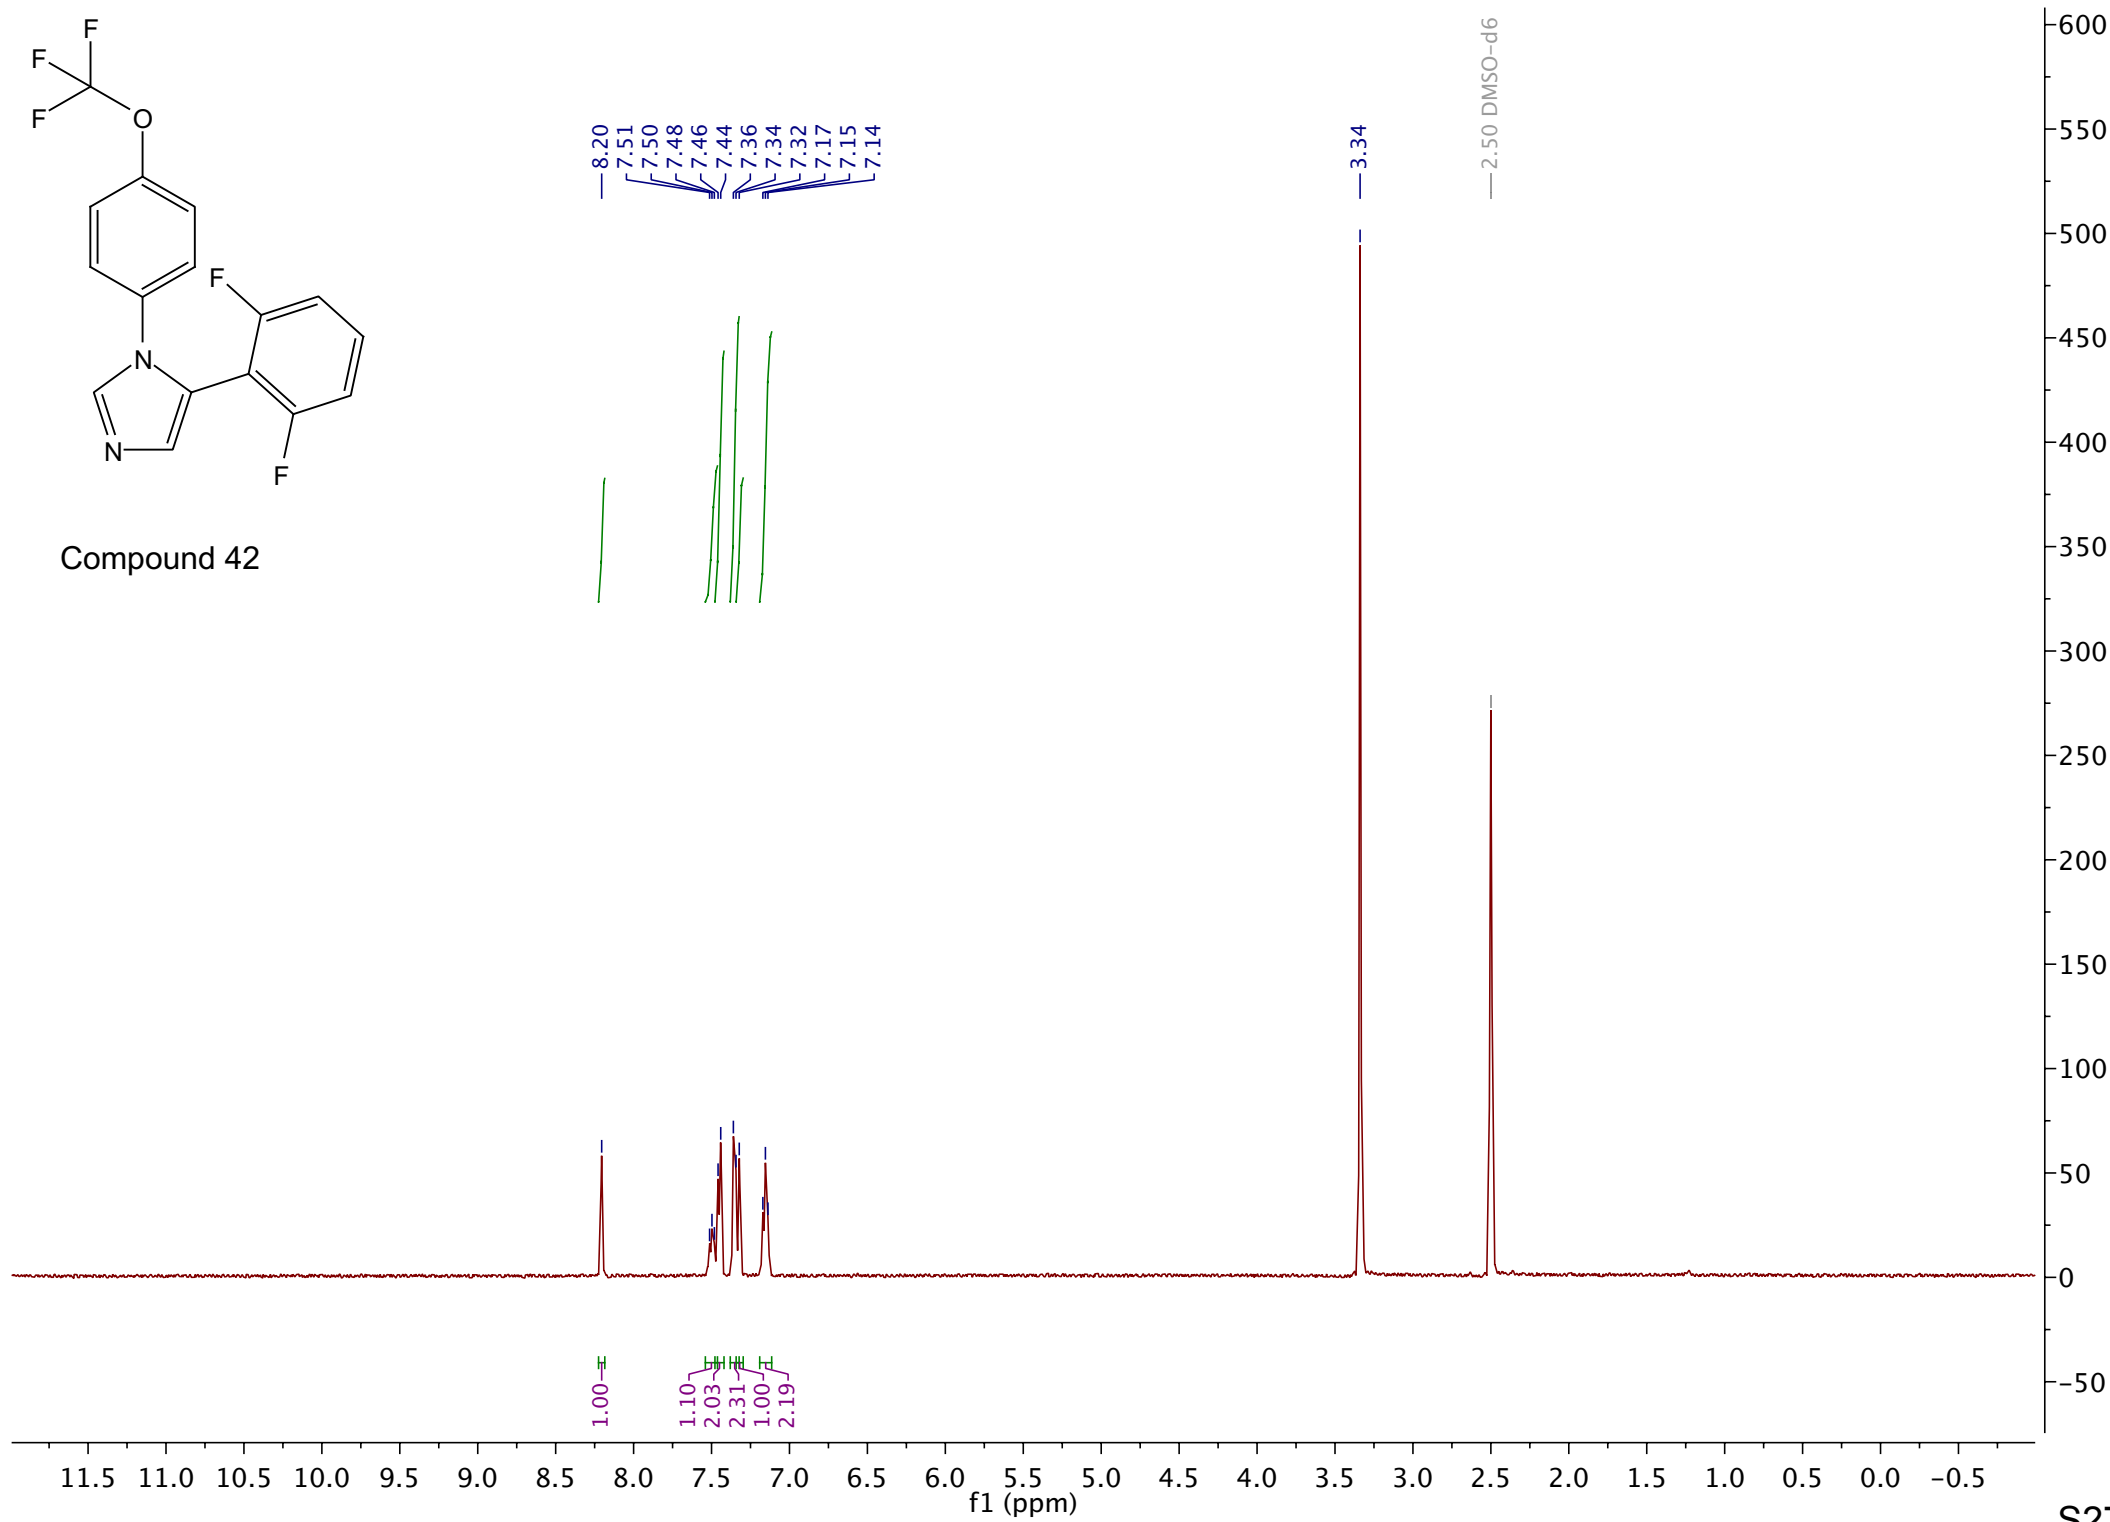

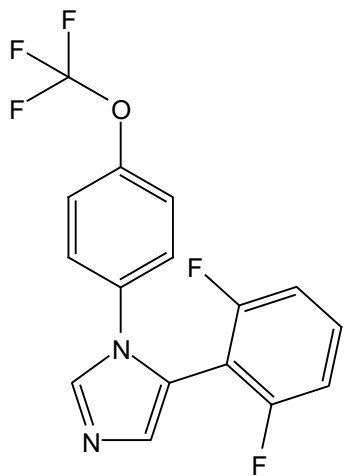

Compound 42

160.55  
160.51  
158.58  
158.53  
147.53  
147.52  
147.50  
139.64  
135.08  
131.88  
131.80  
131.76  
131.72  
126.09  
122.98  
122.12  
120.93  
118.93  
118.89  
116.85  
112.08  
112.04  
111.92  
111.88  
111.88  
106.72  
106.56  
106.40

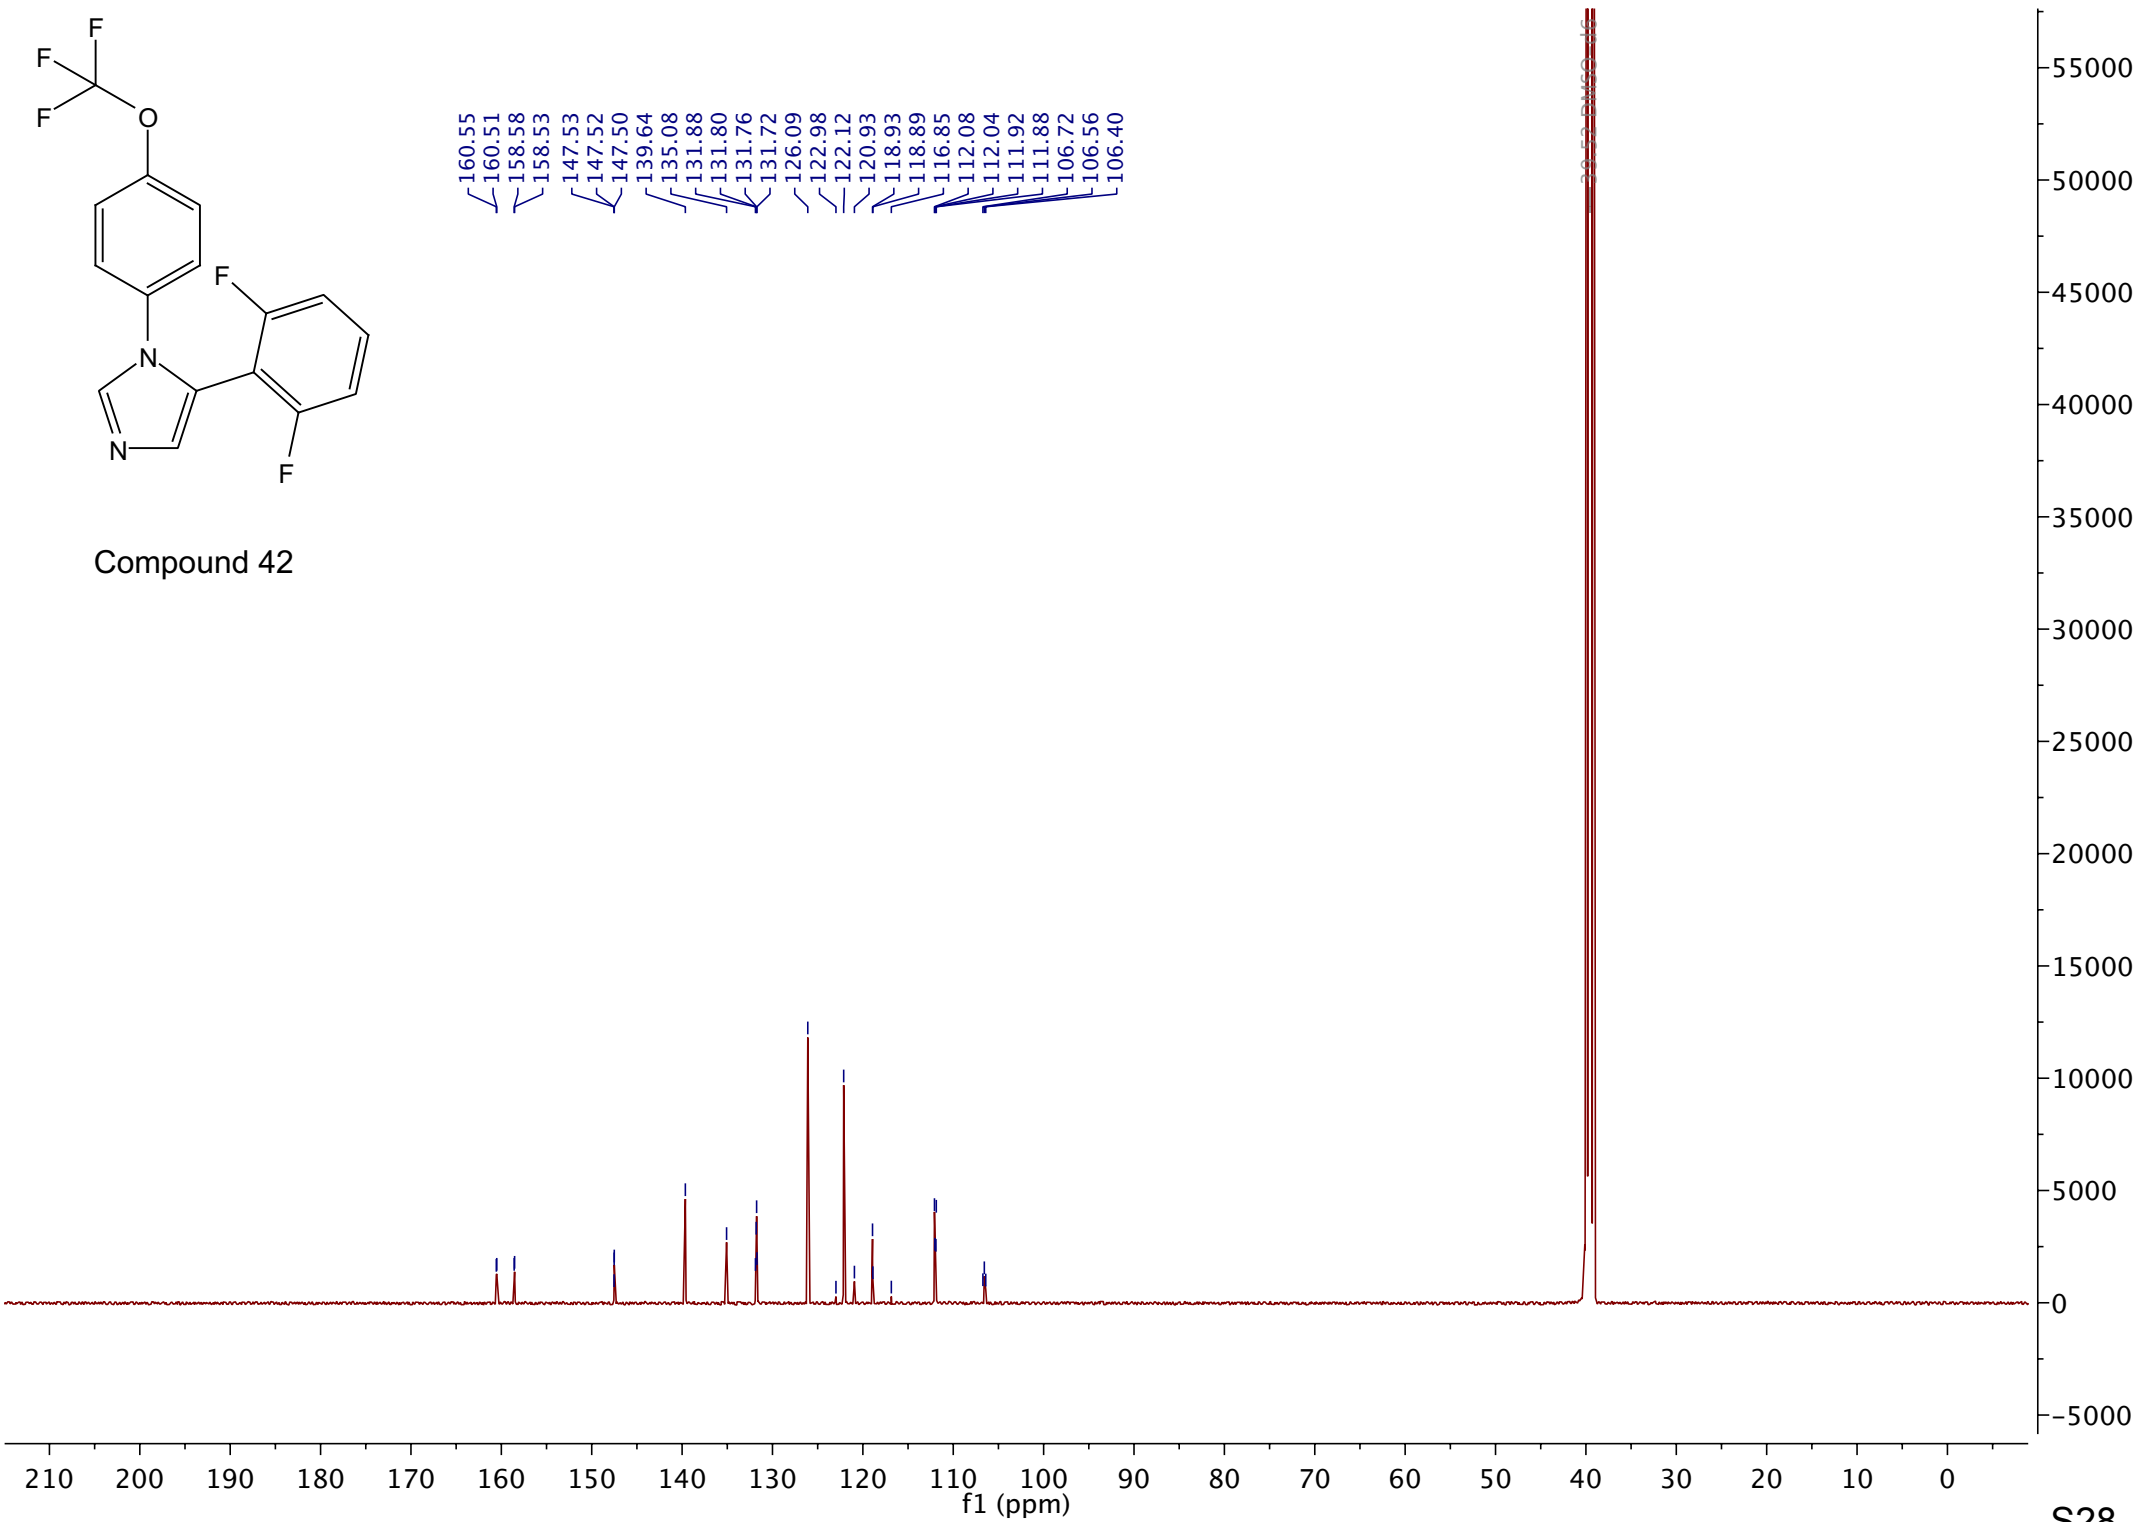

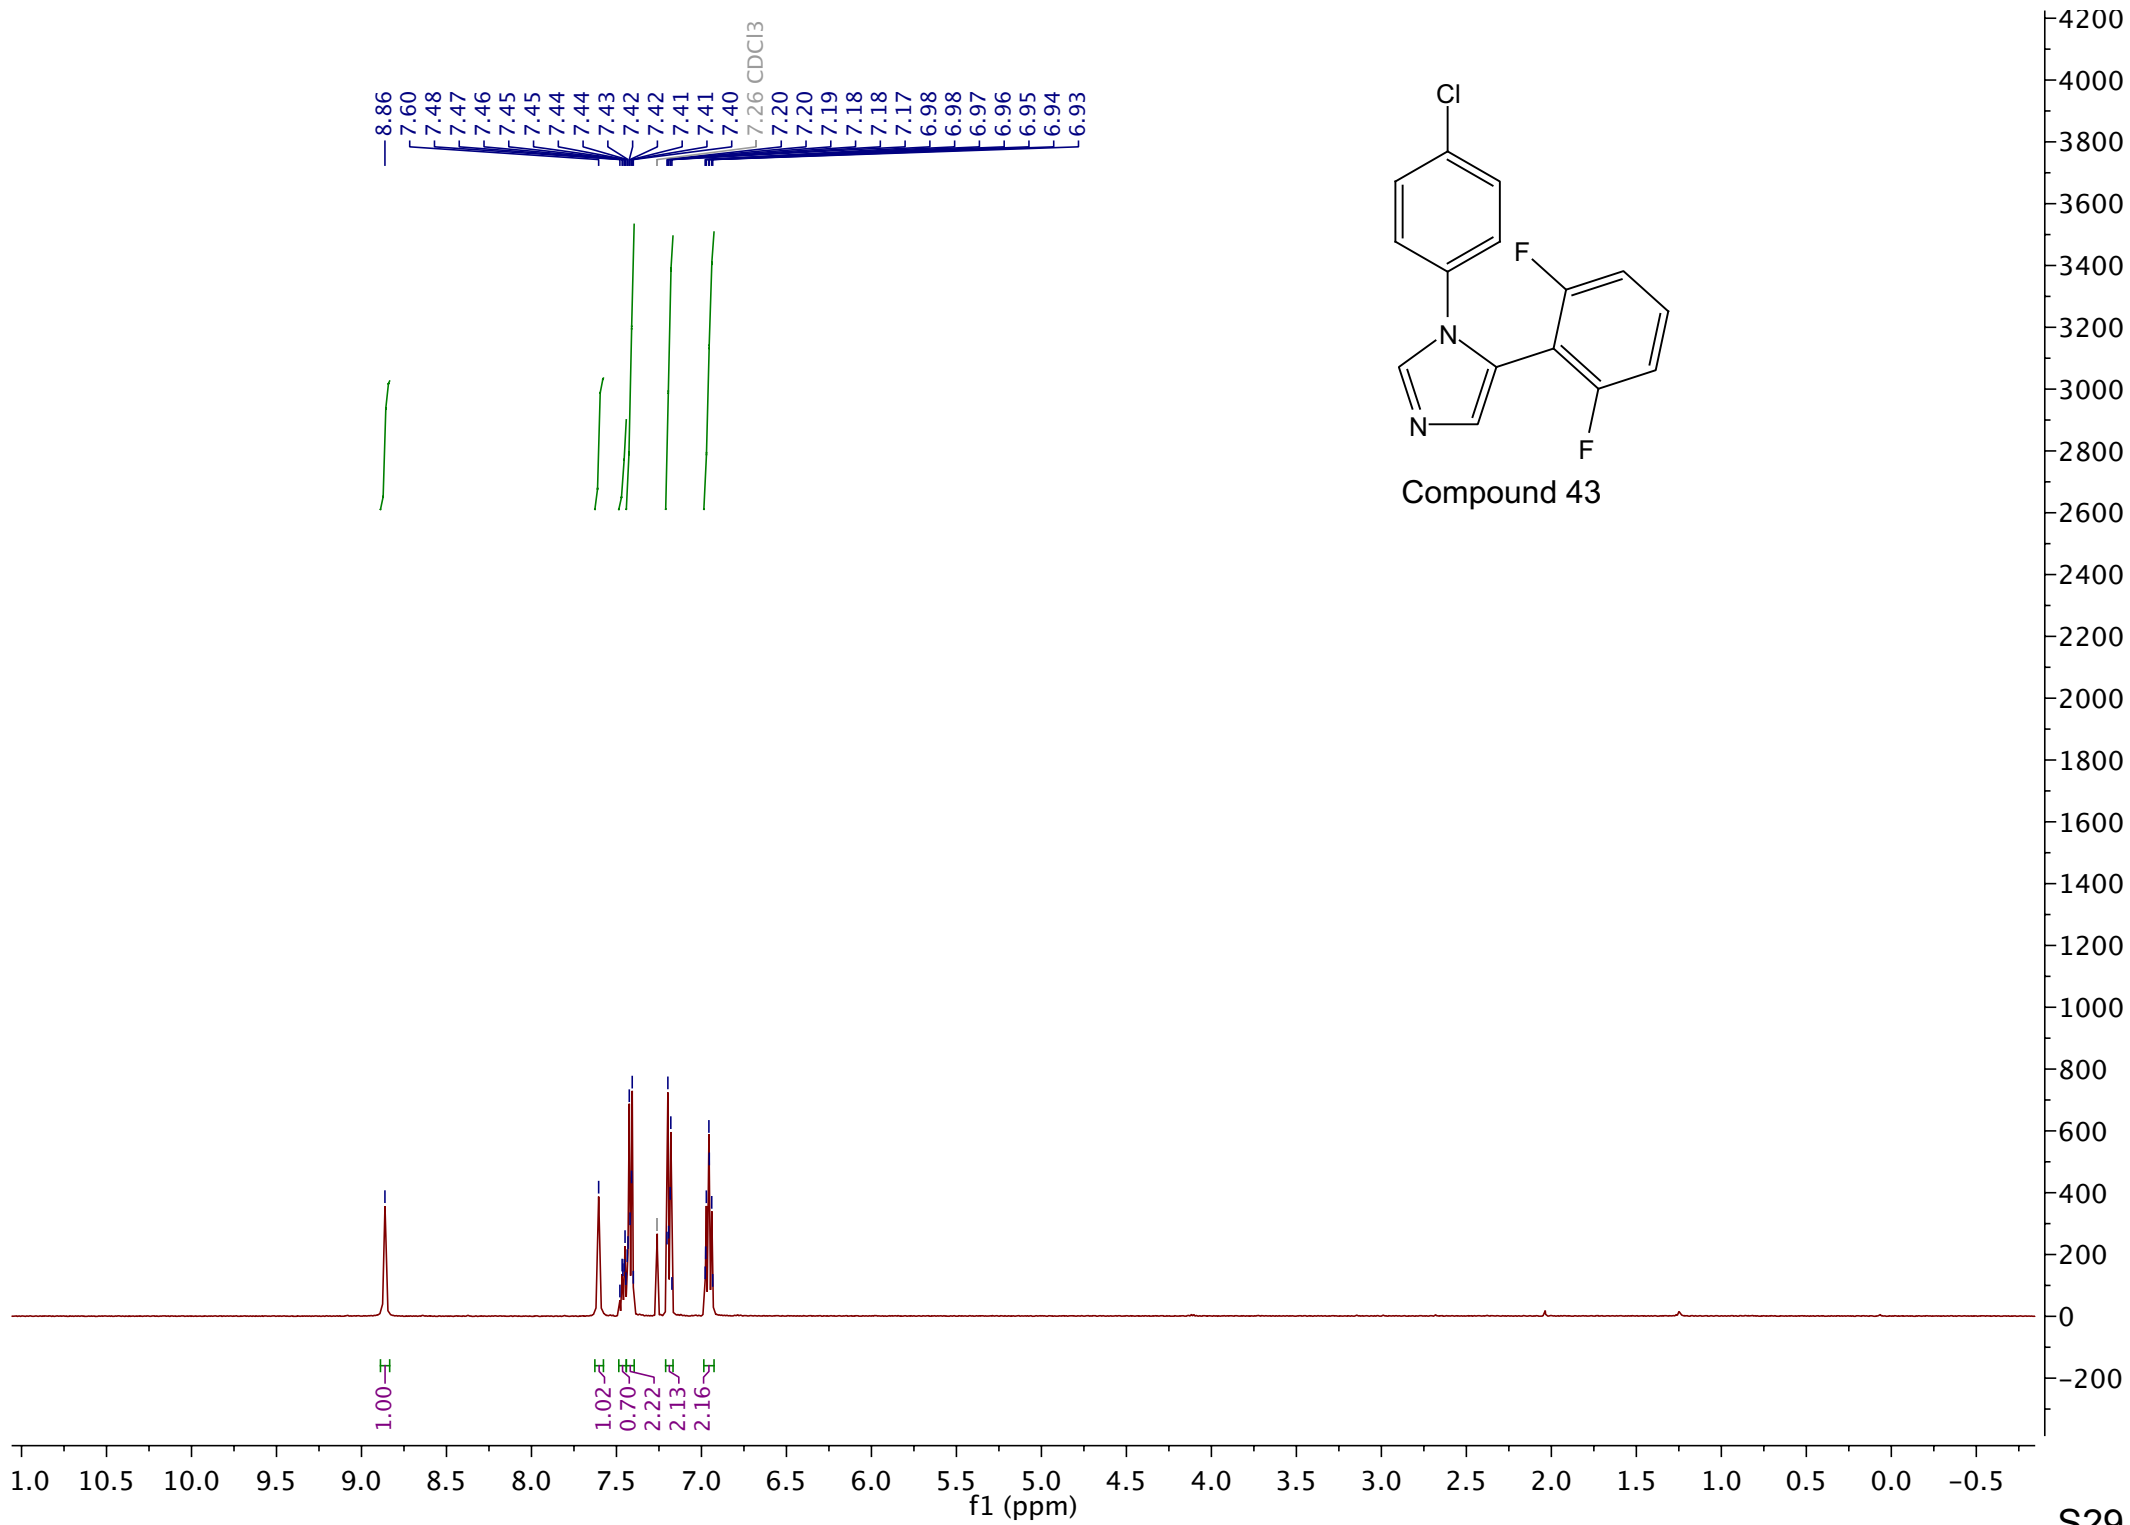

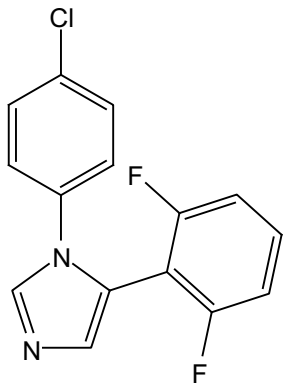

Compound 43

161.49  
161.44  
159.47  
159.43

136.99  
136.90  
133.52  
133.44  
133.36  
132.54  
130.41  
126.30  
123.71  
122.62  
112.31  
112.28  
112.15  
112.11  
103.86  
103.70  
103.55

77.16 CDCl3

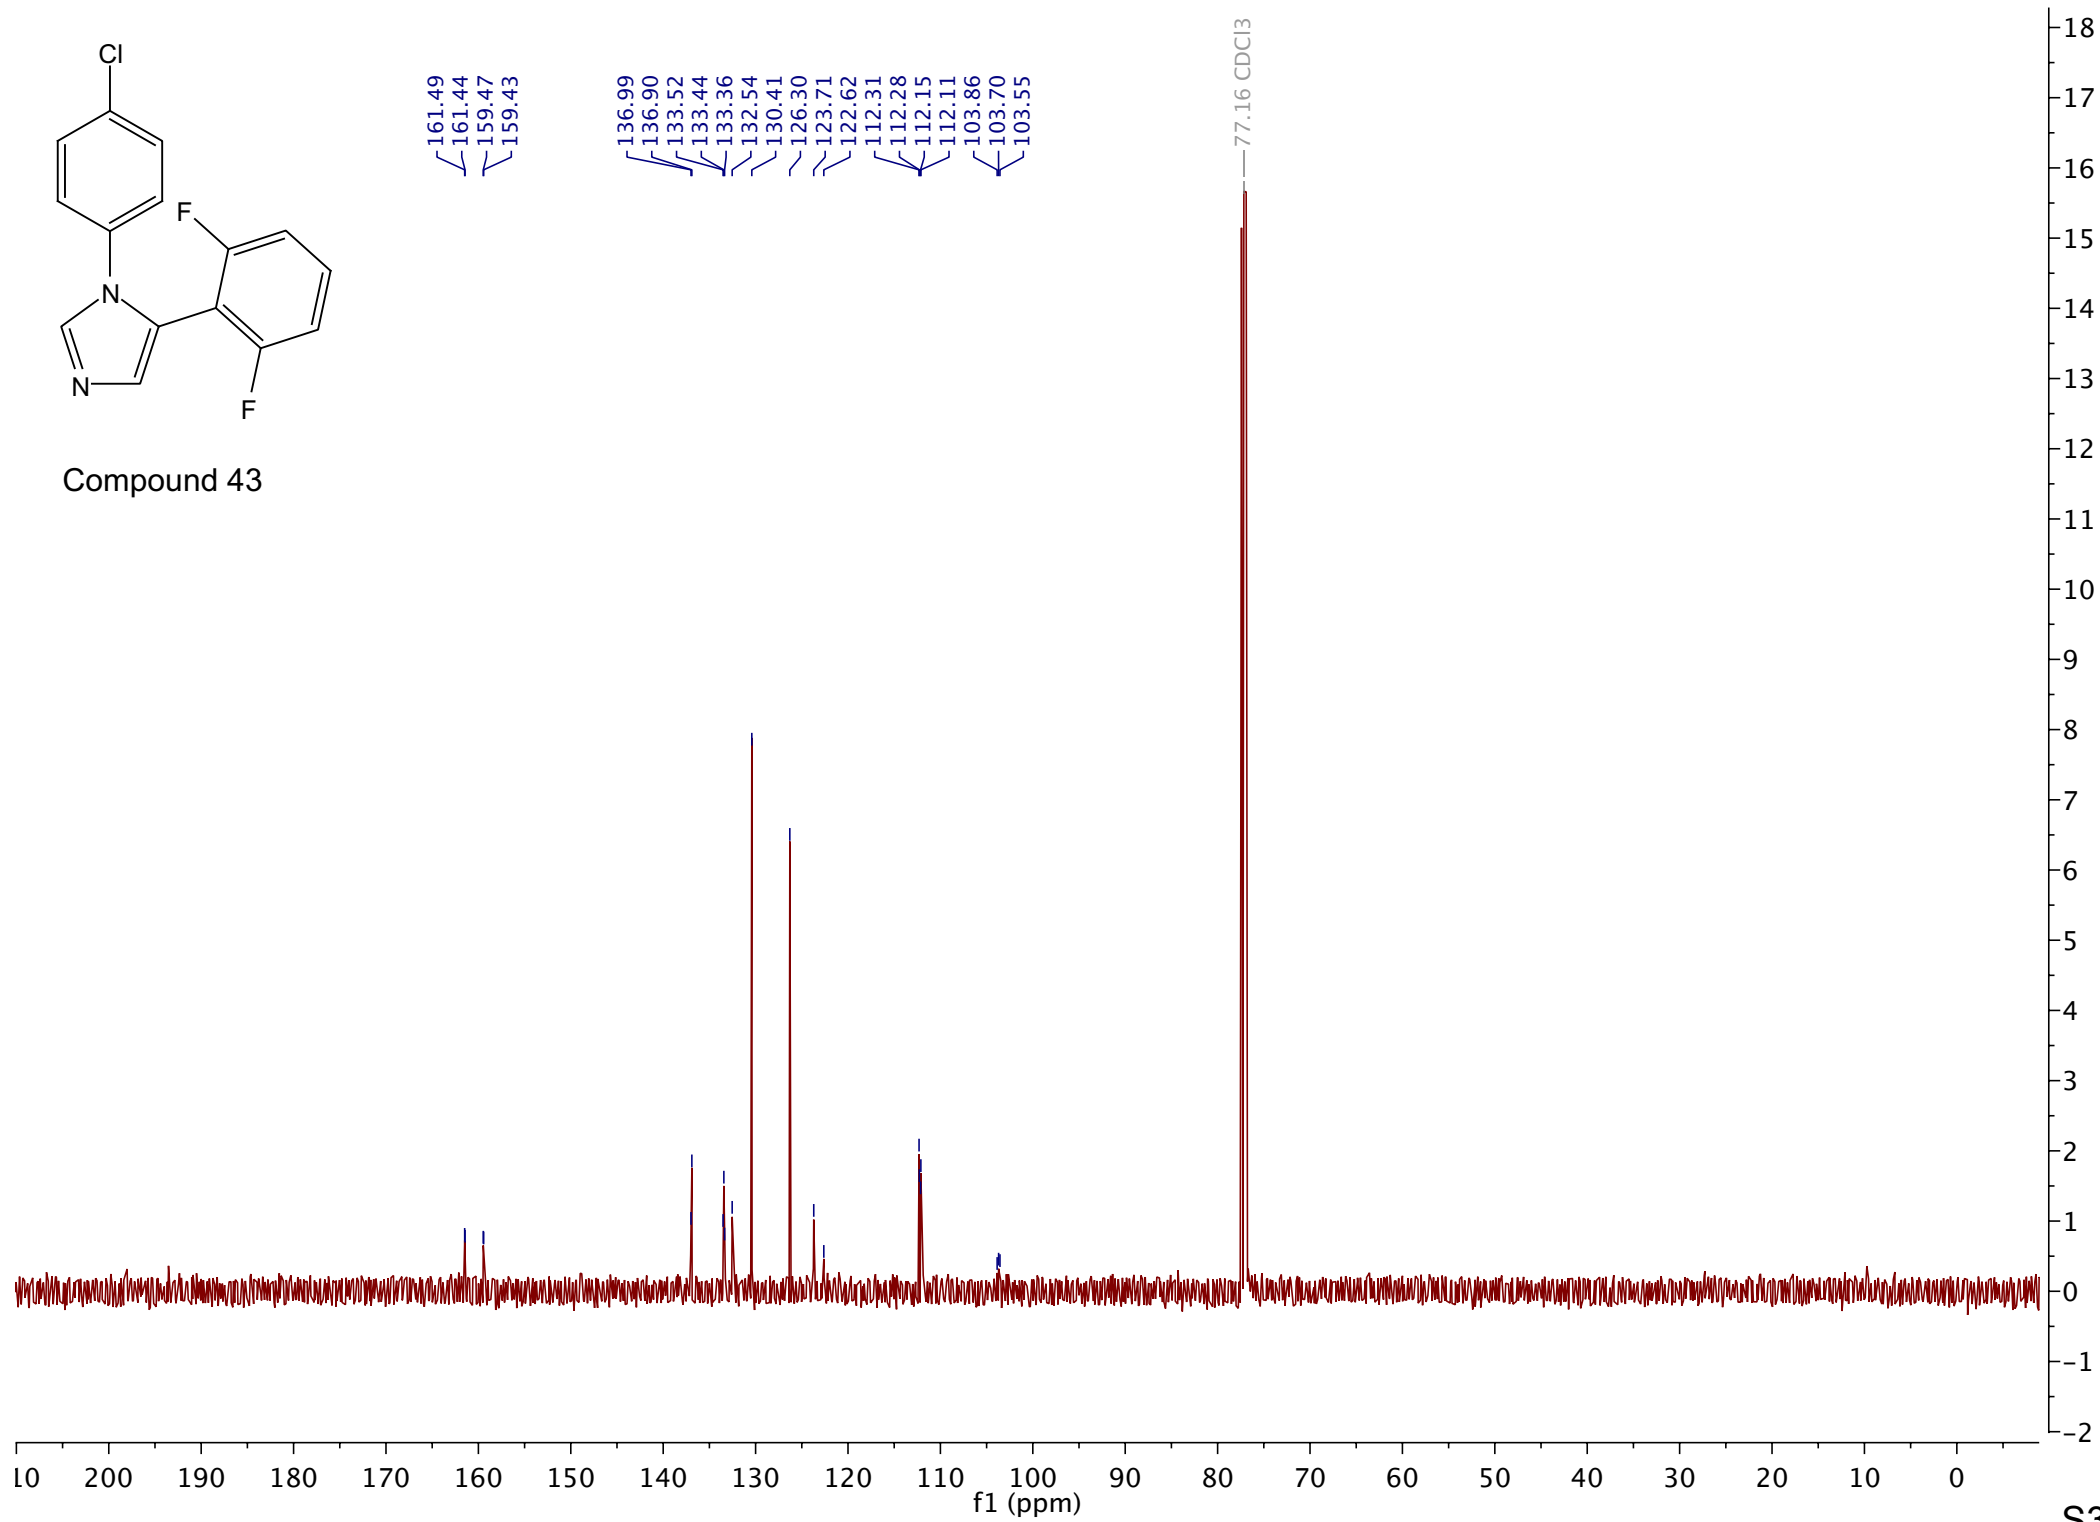

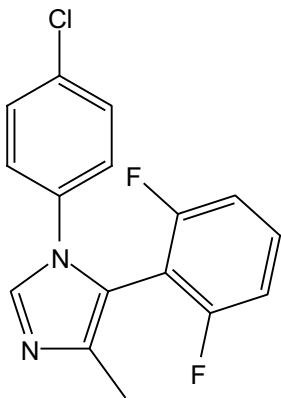

Compound 44

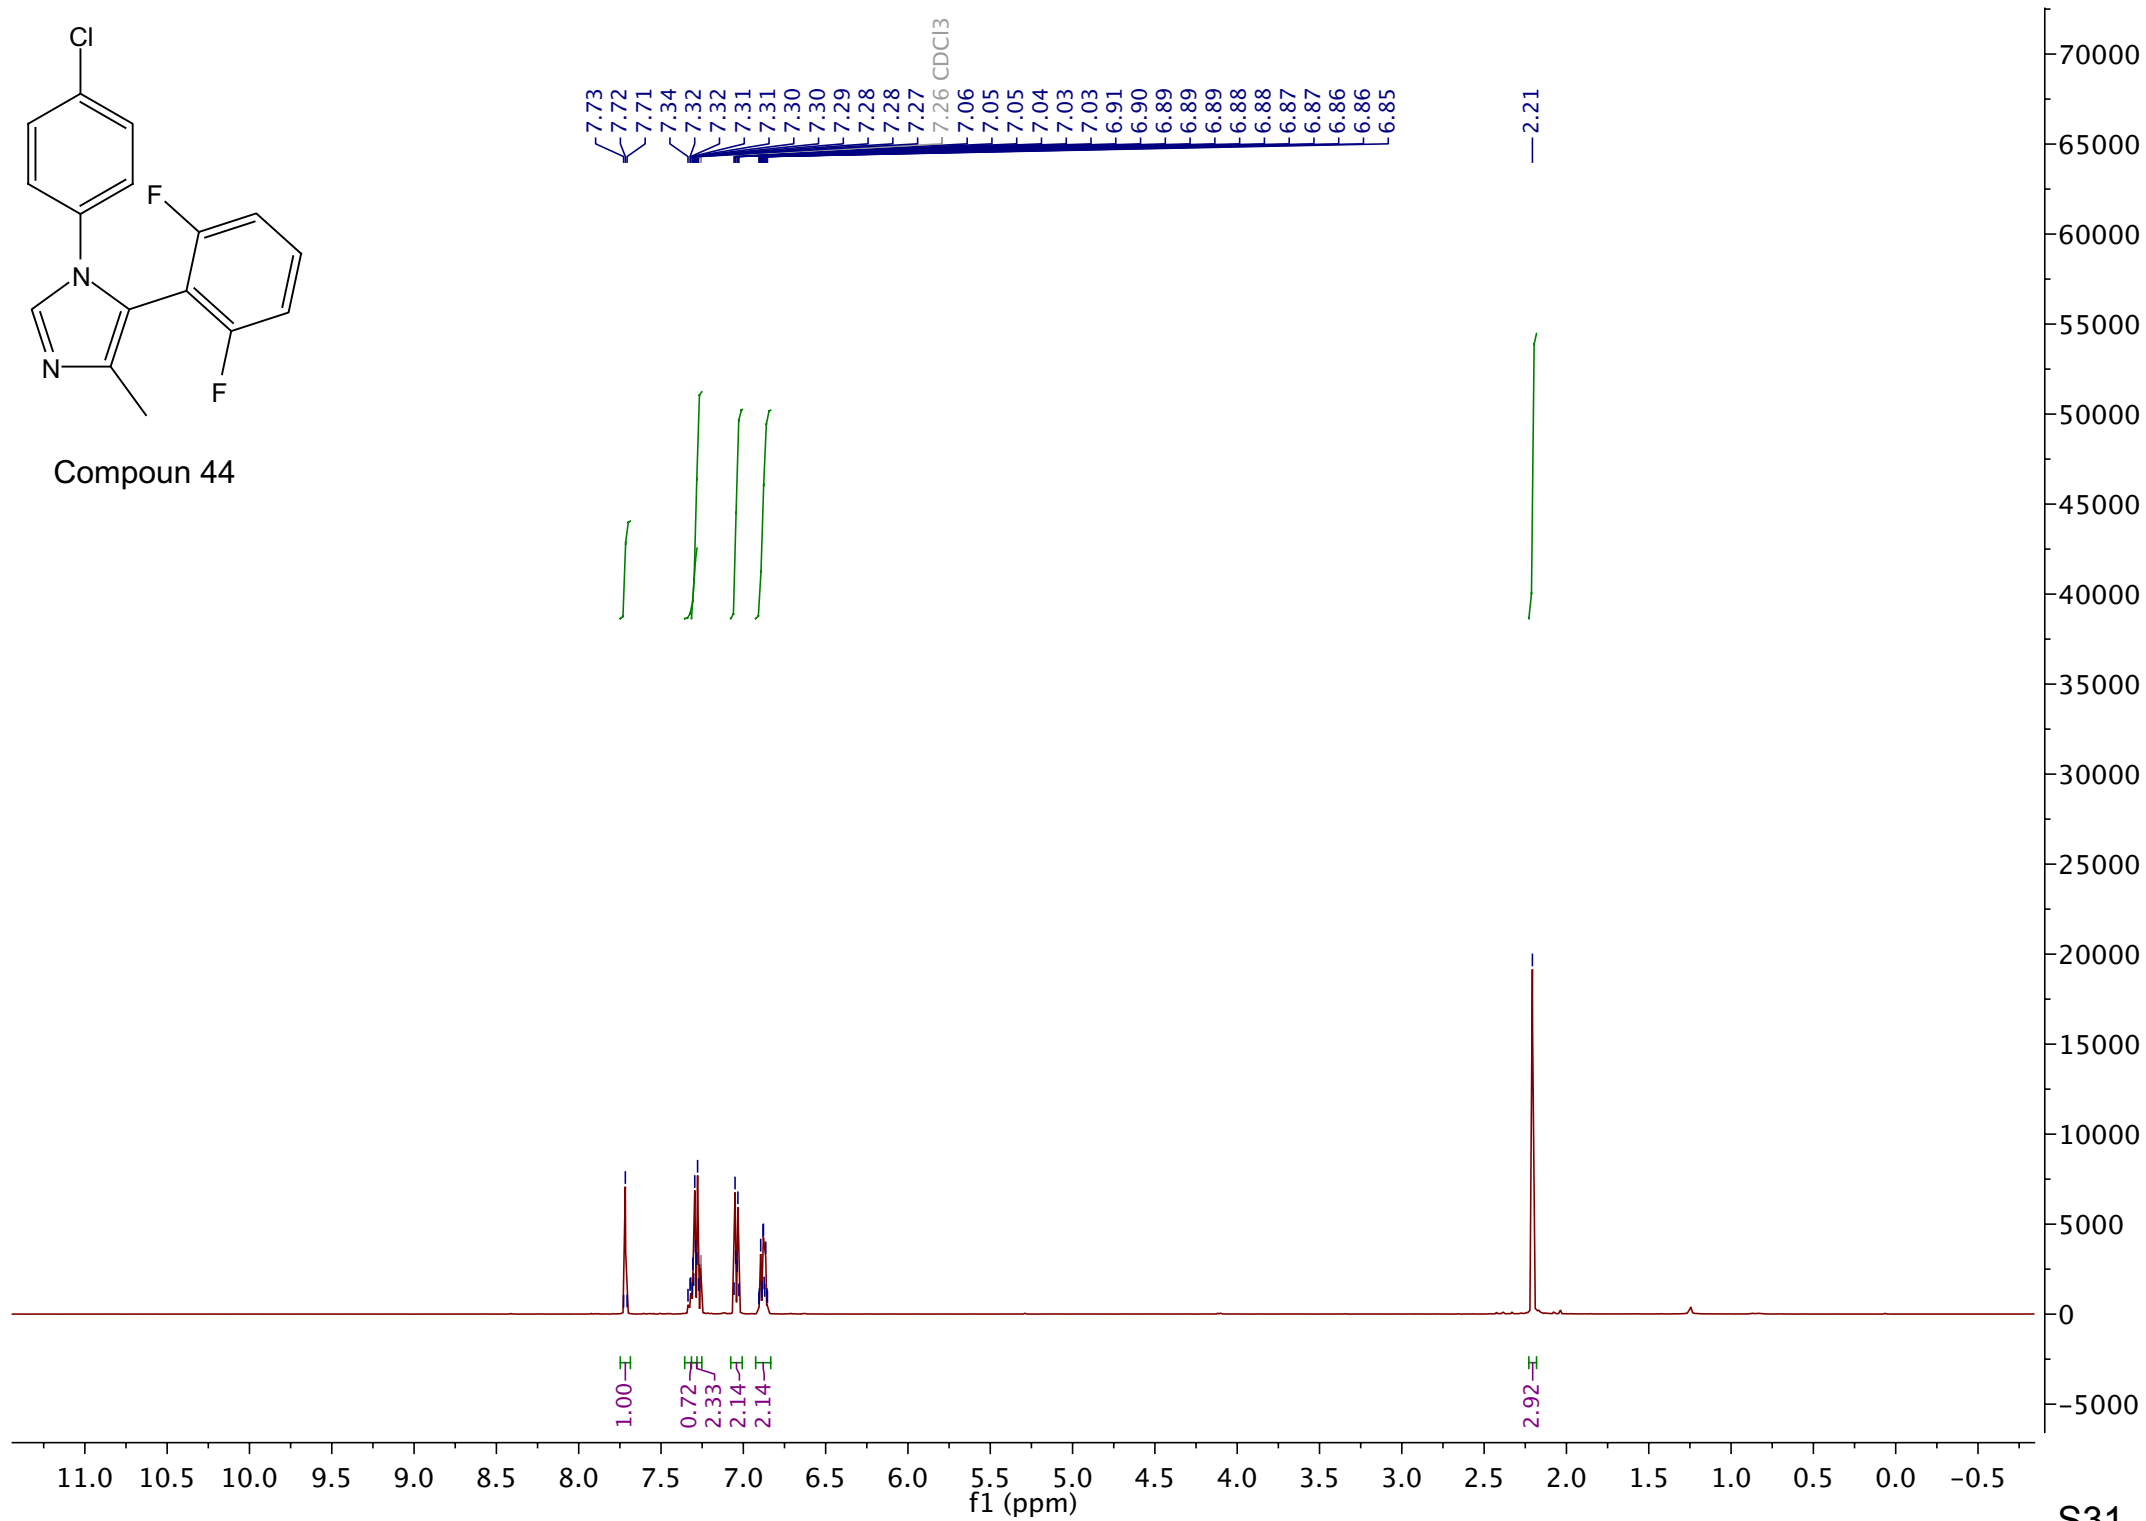

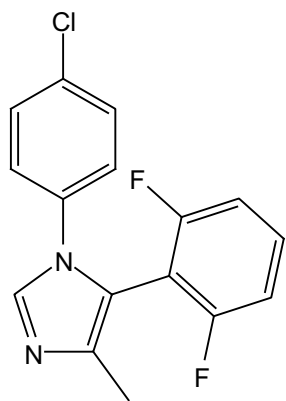

Compound 44

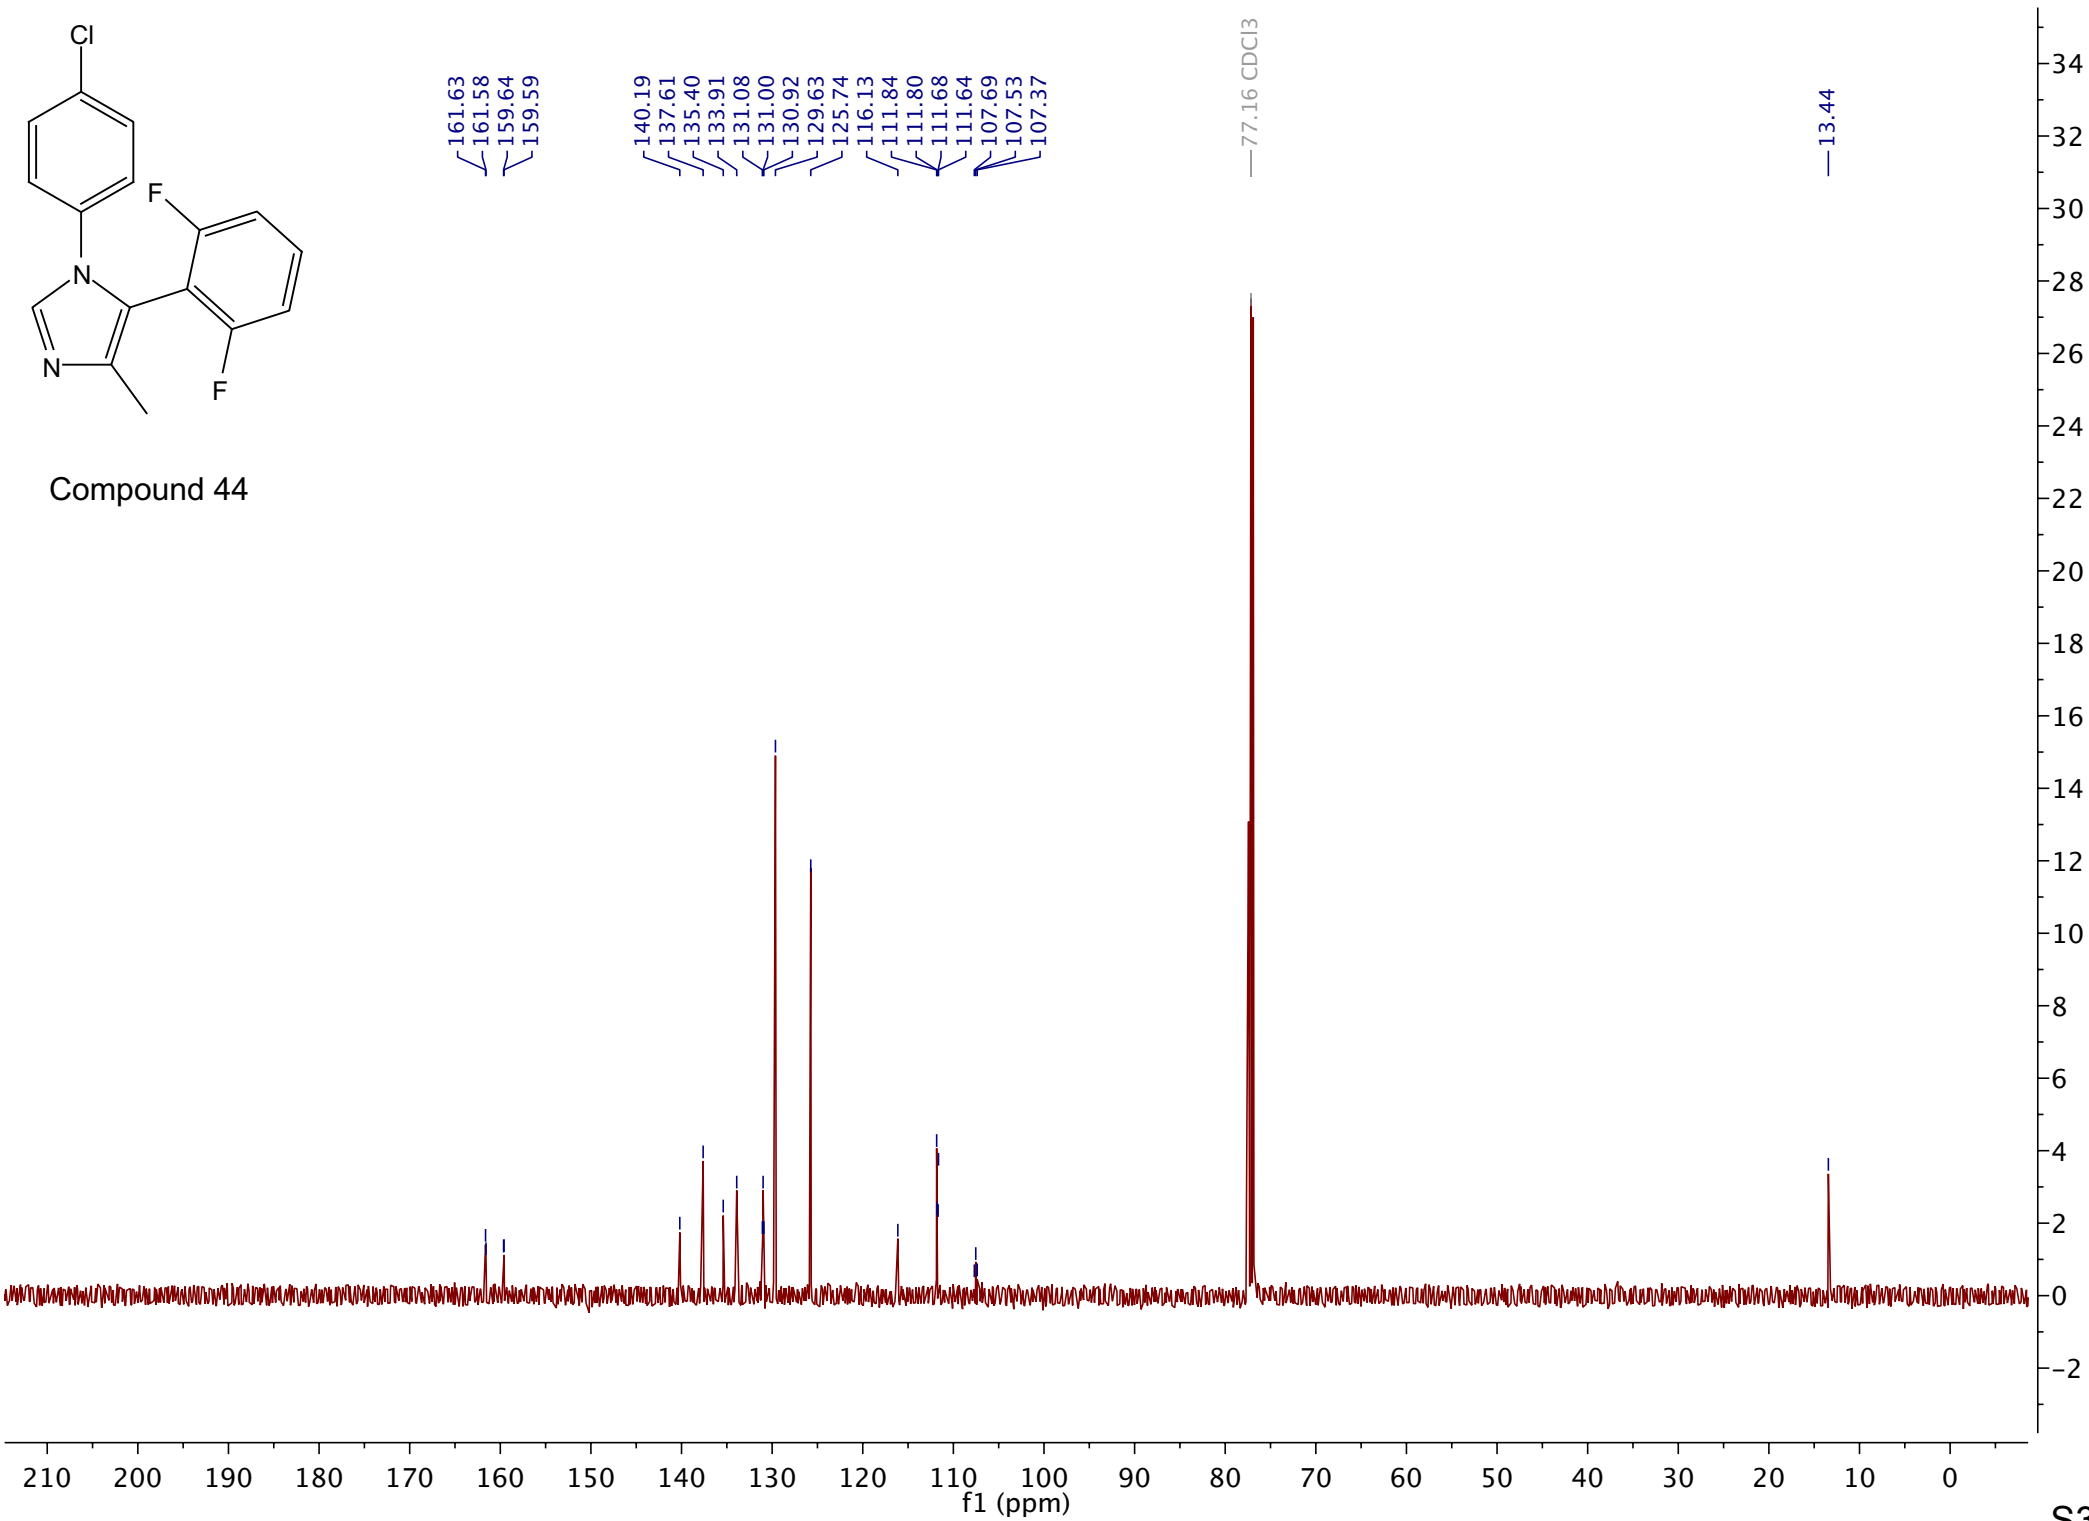



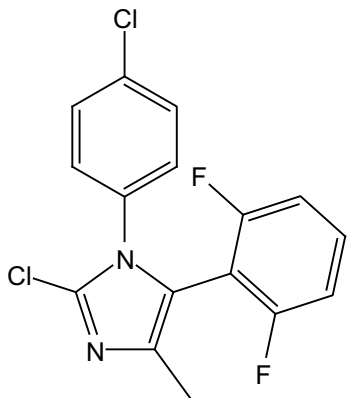

Compound 45

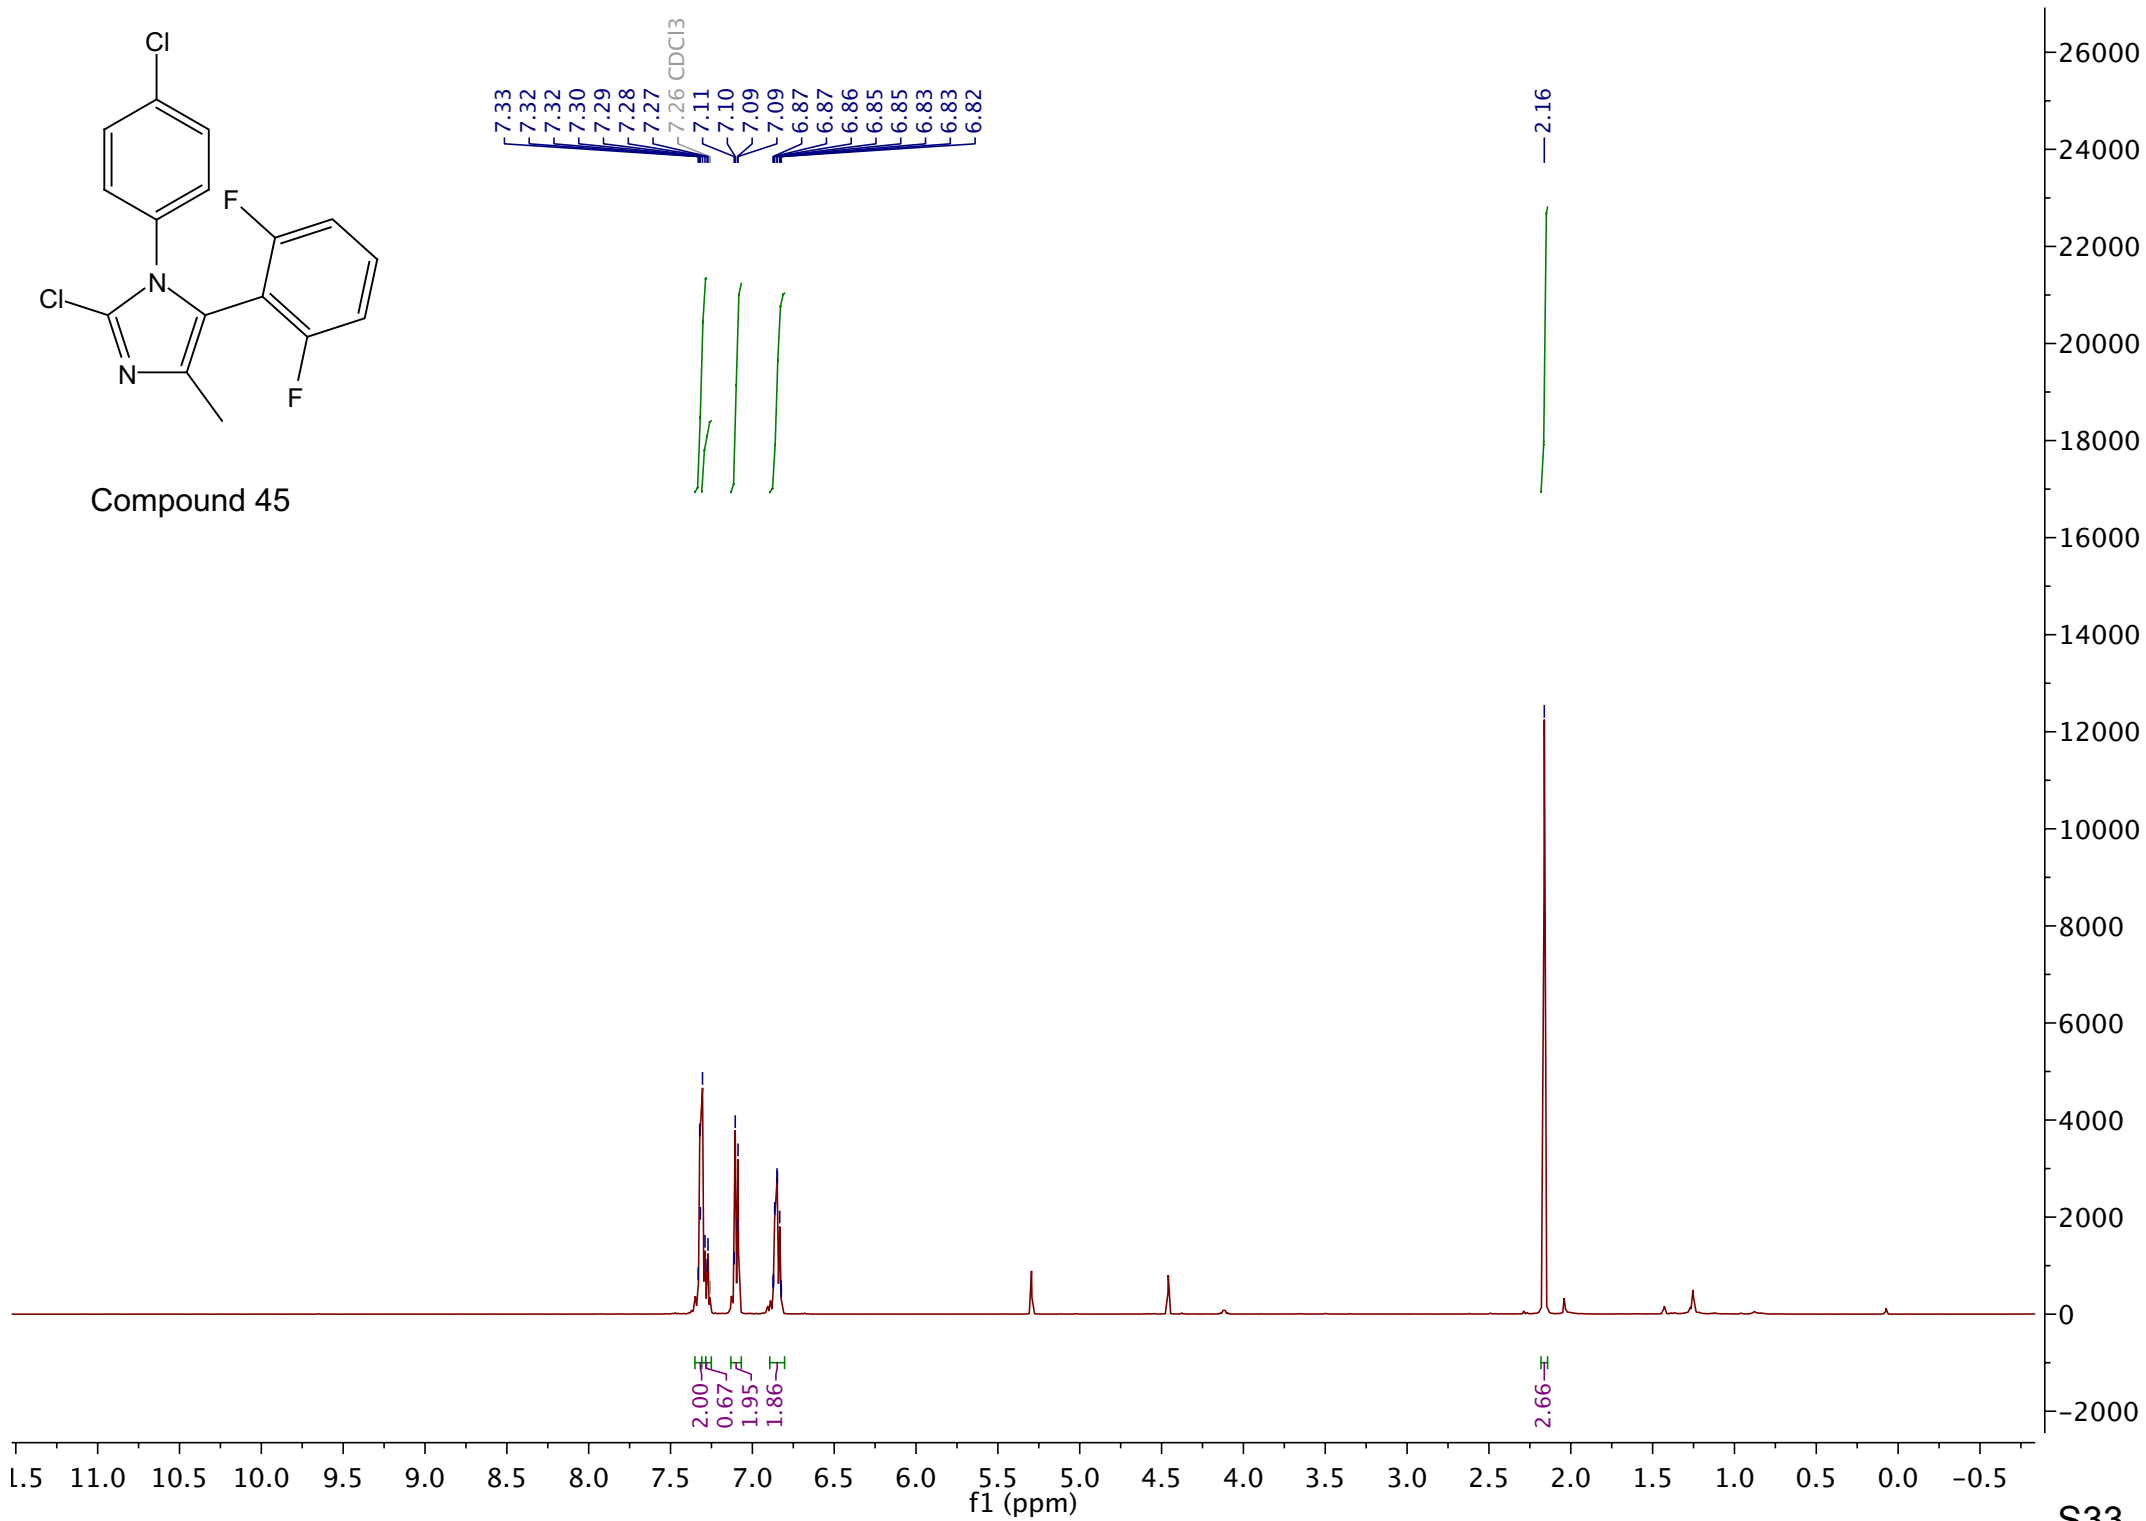

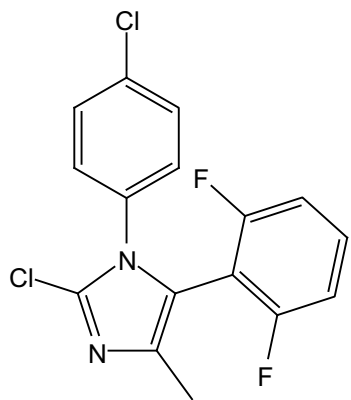

Compound 45

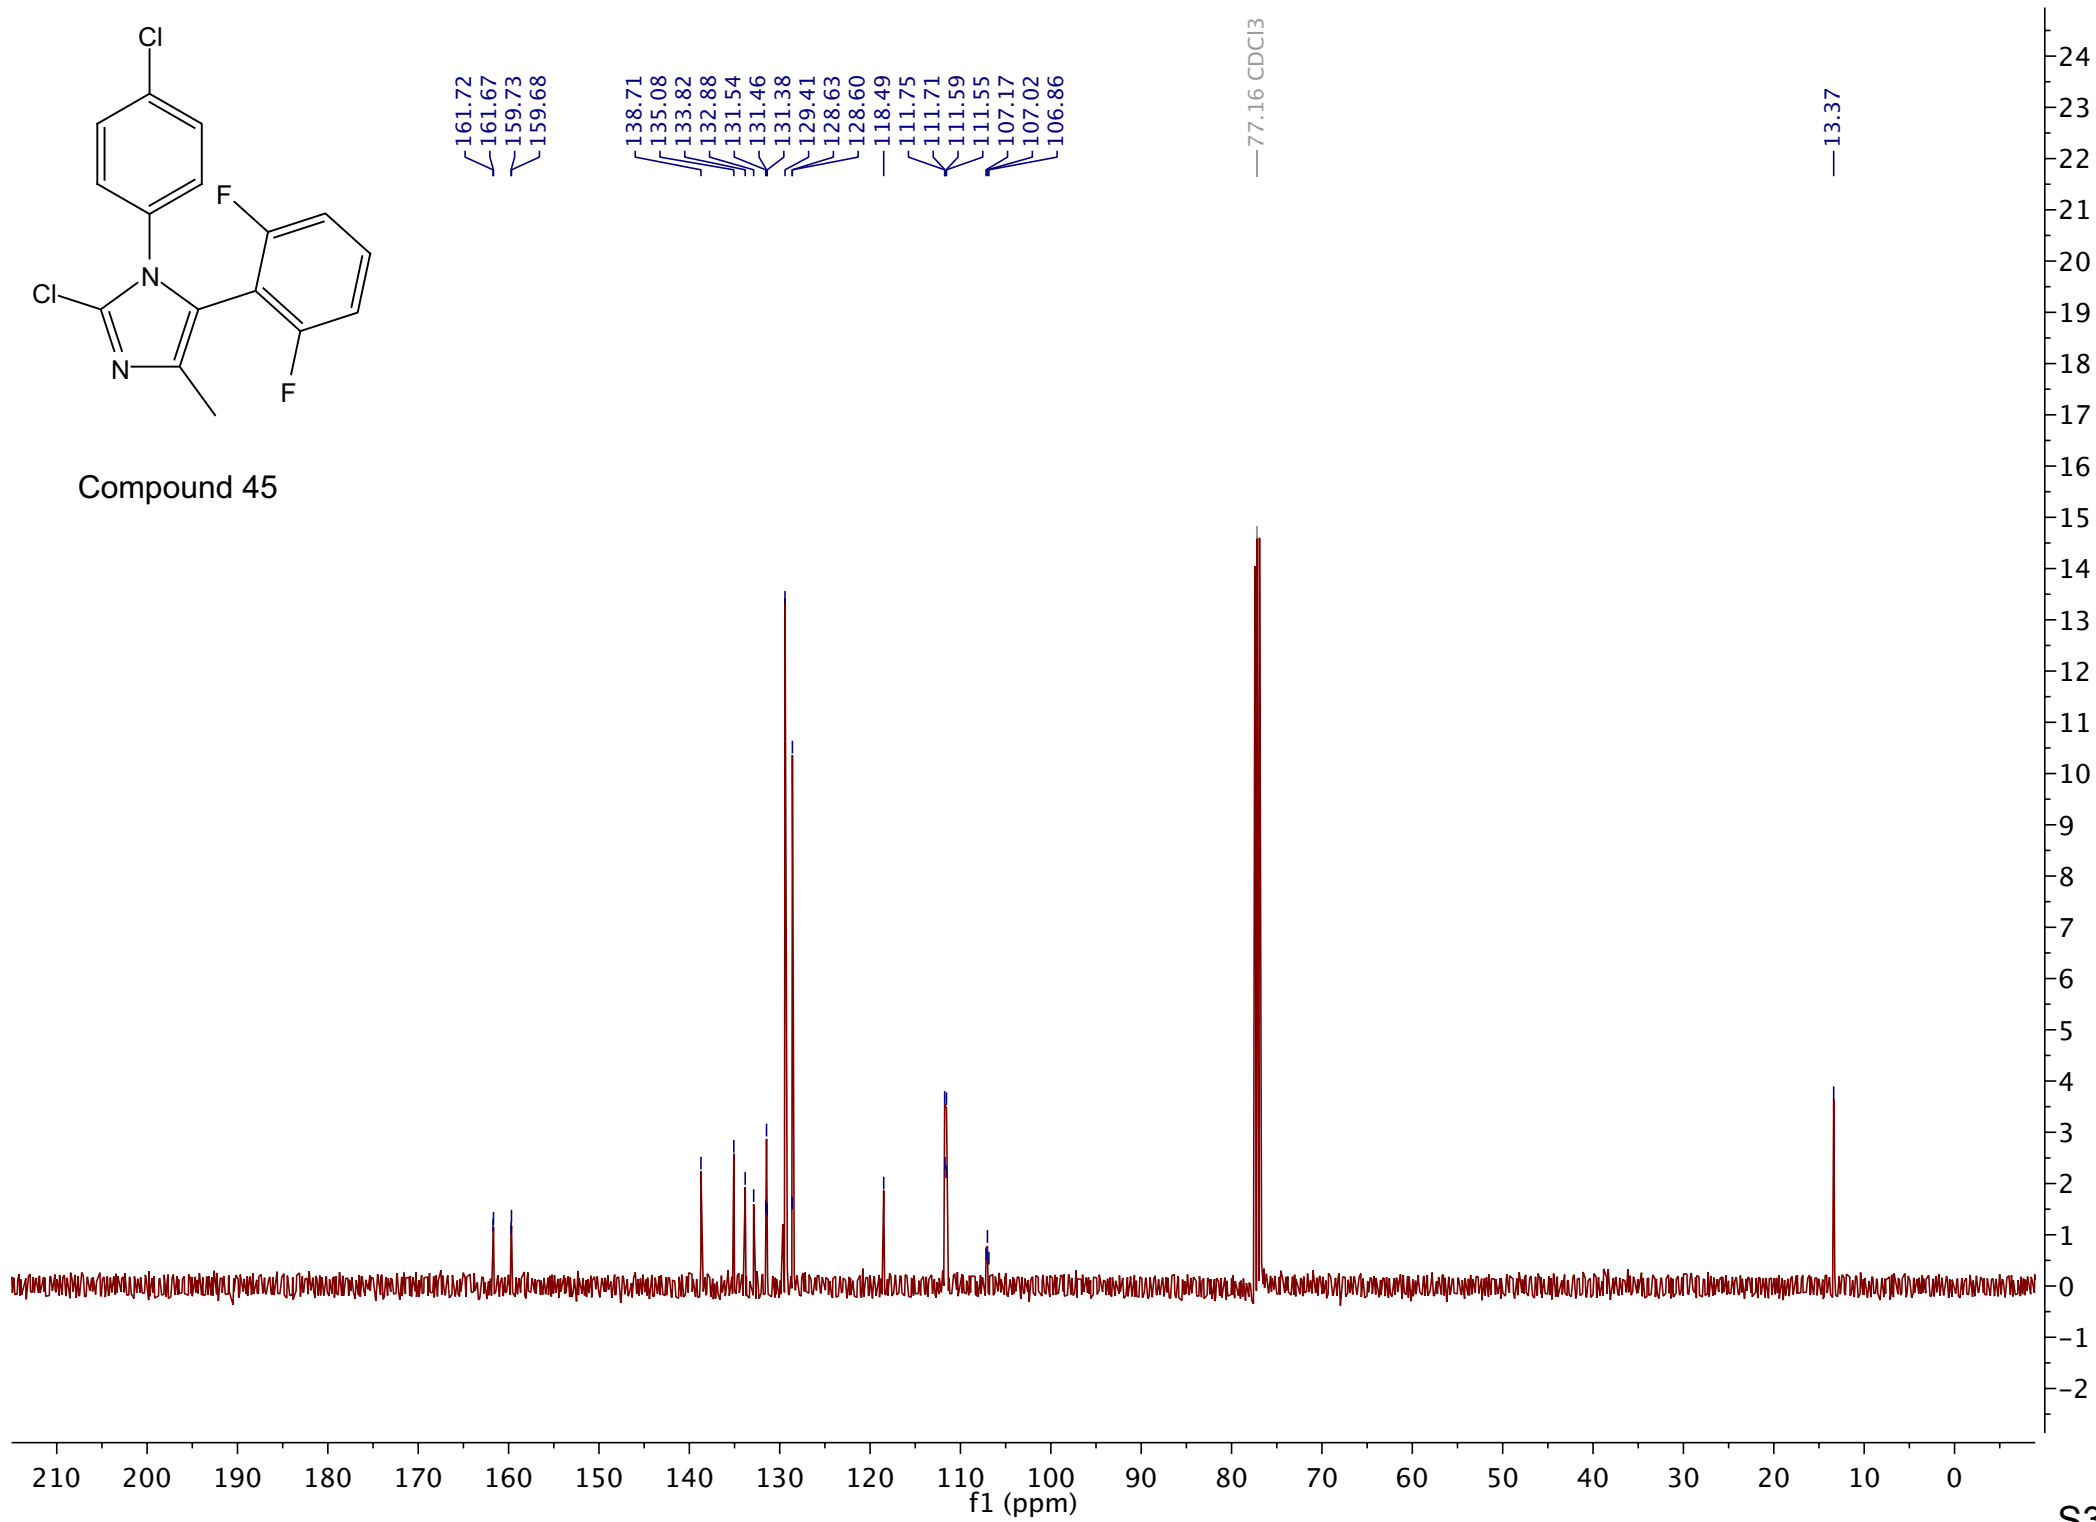

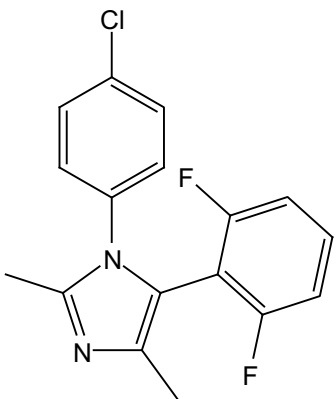

Compound 46

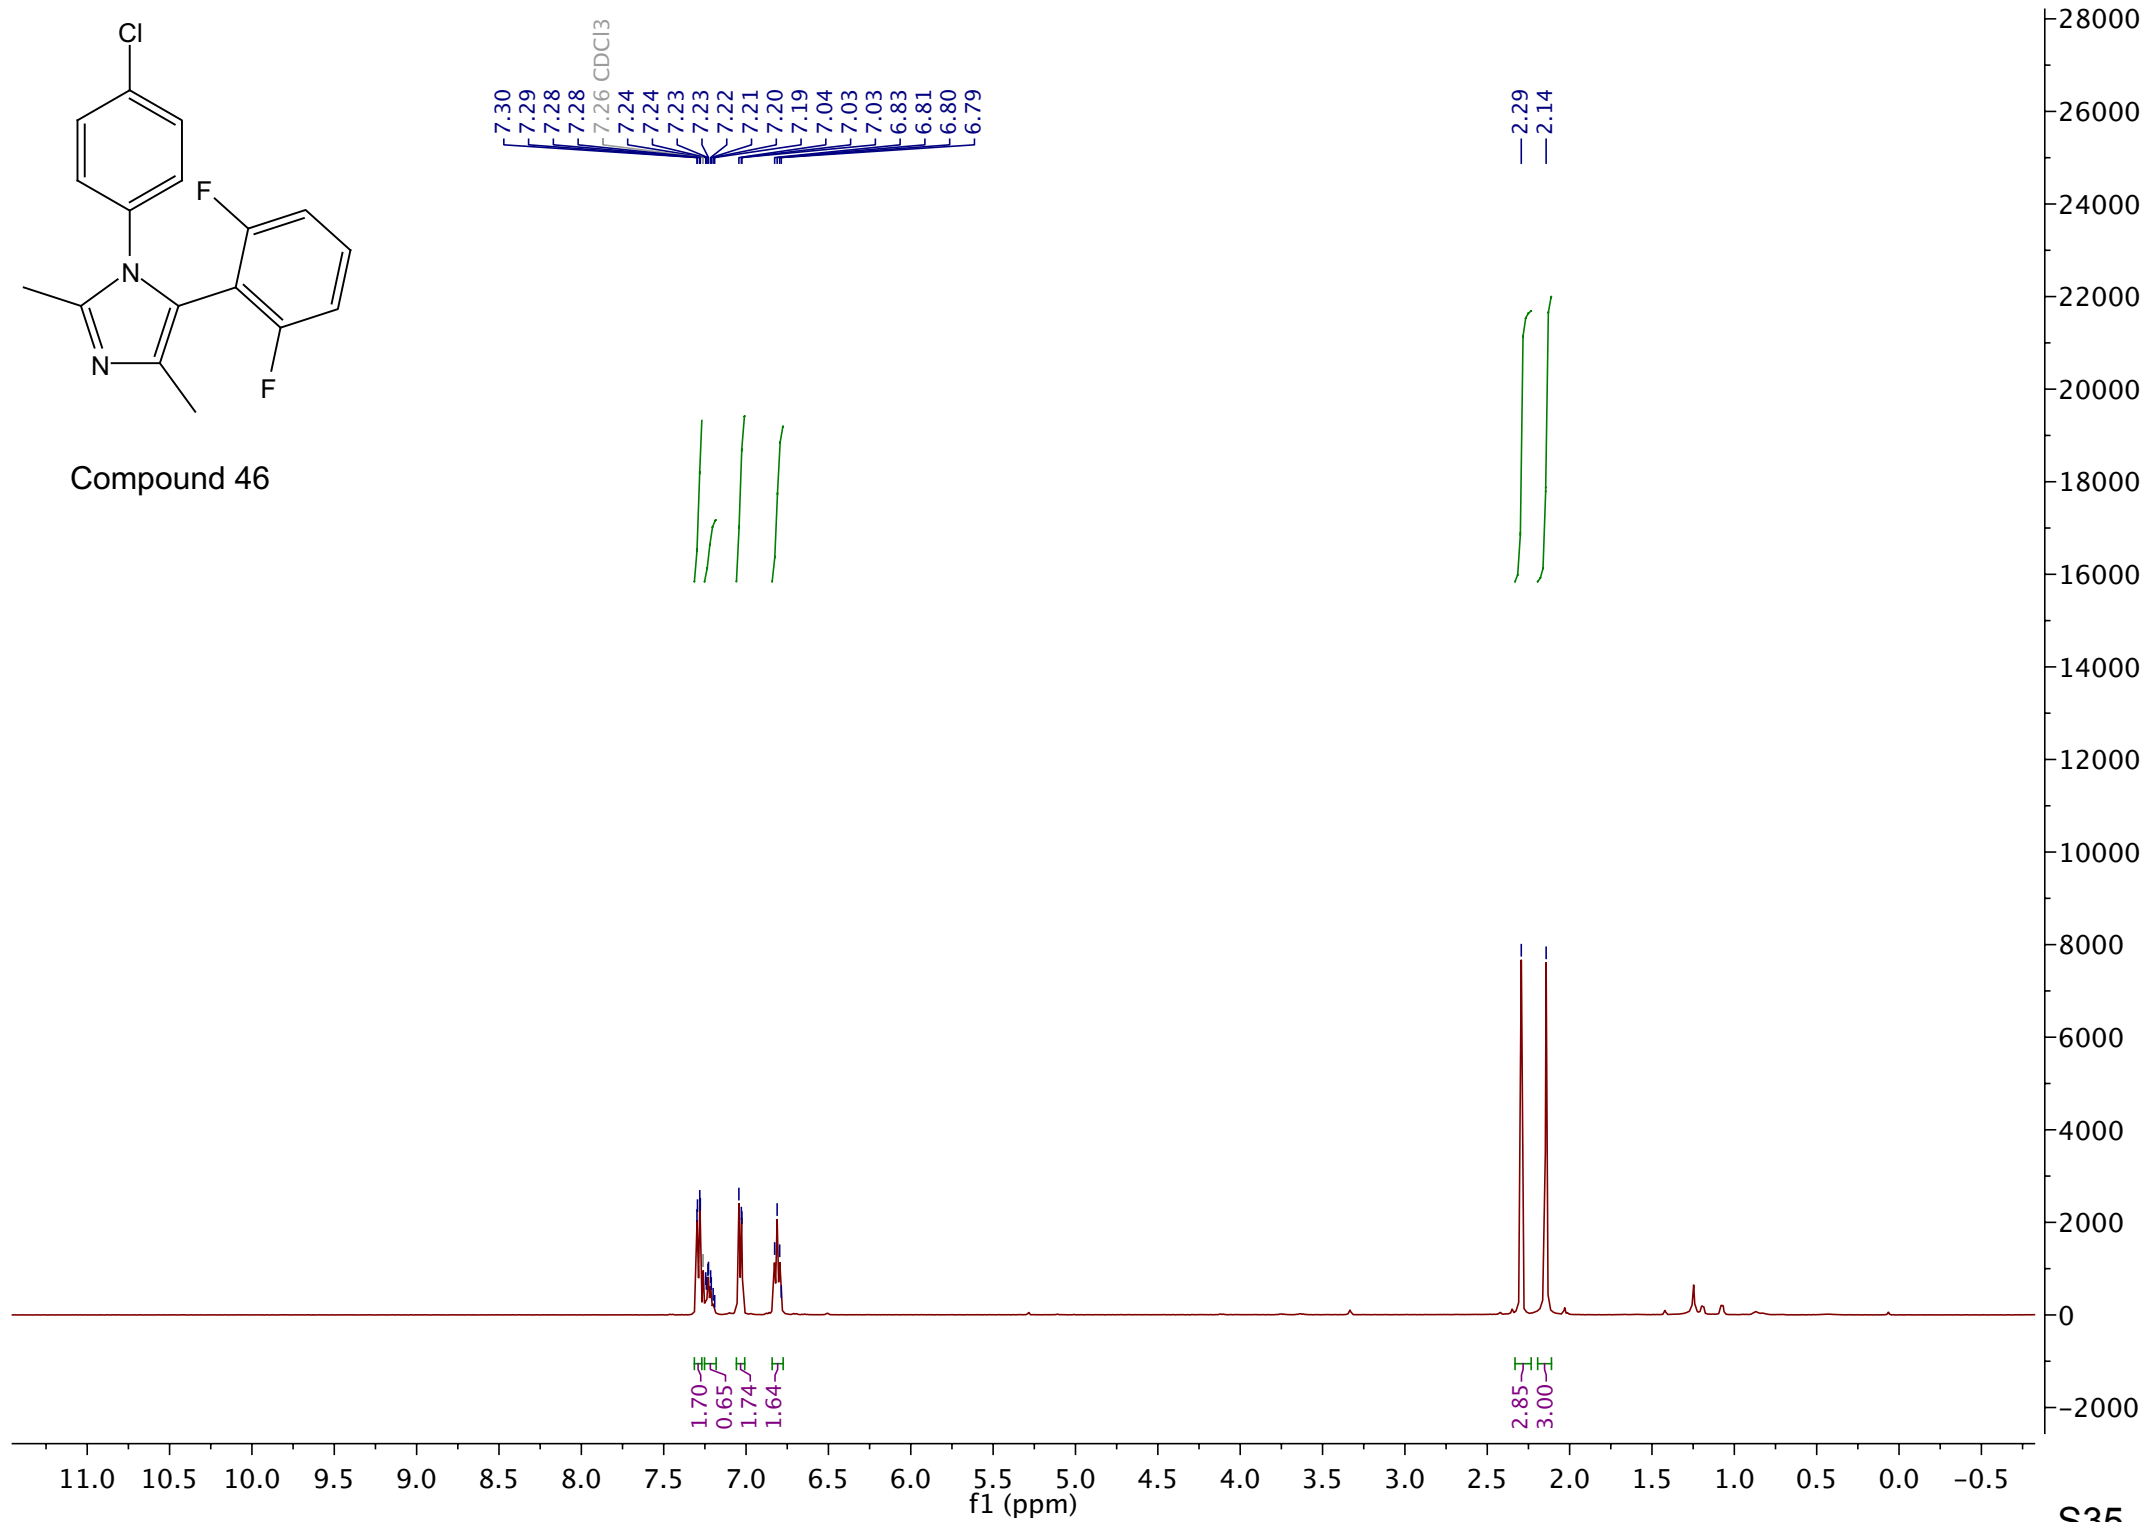

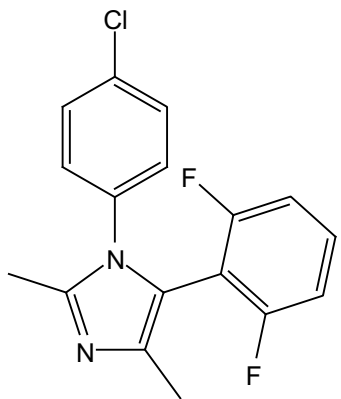

Compound 46

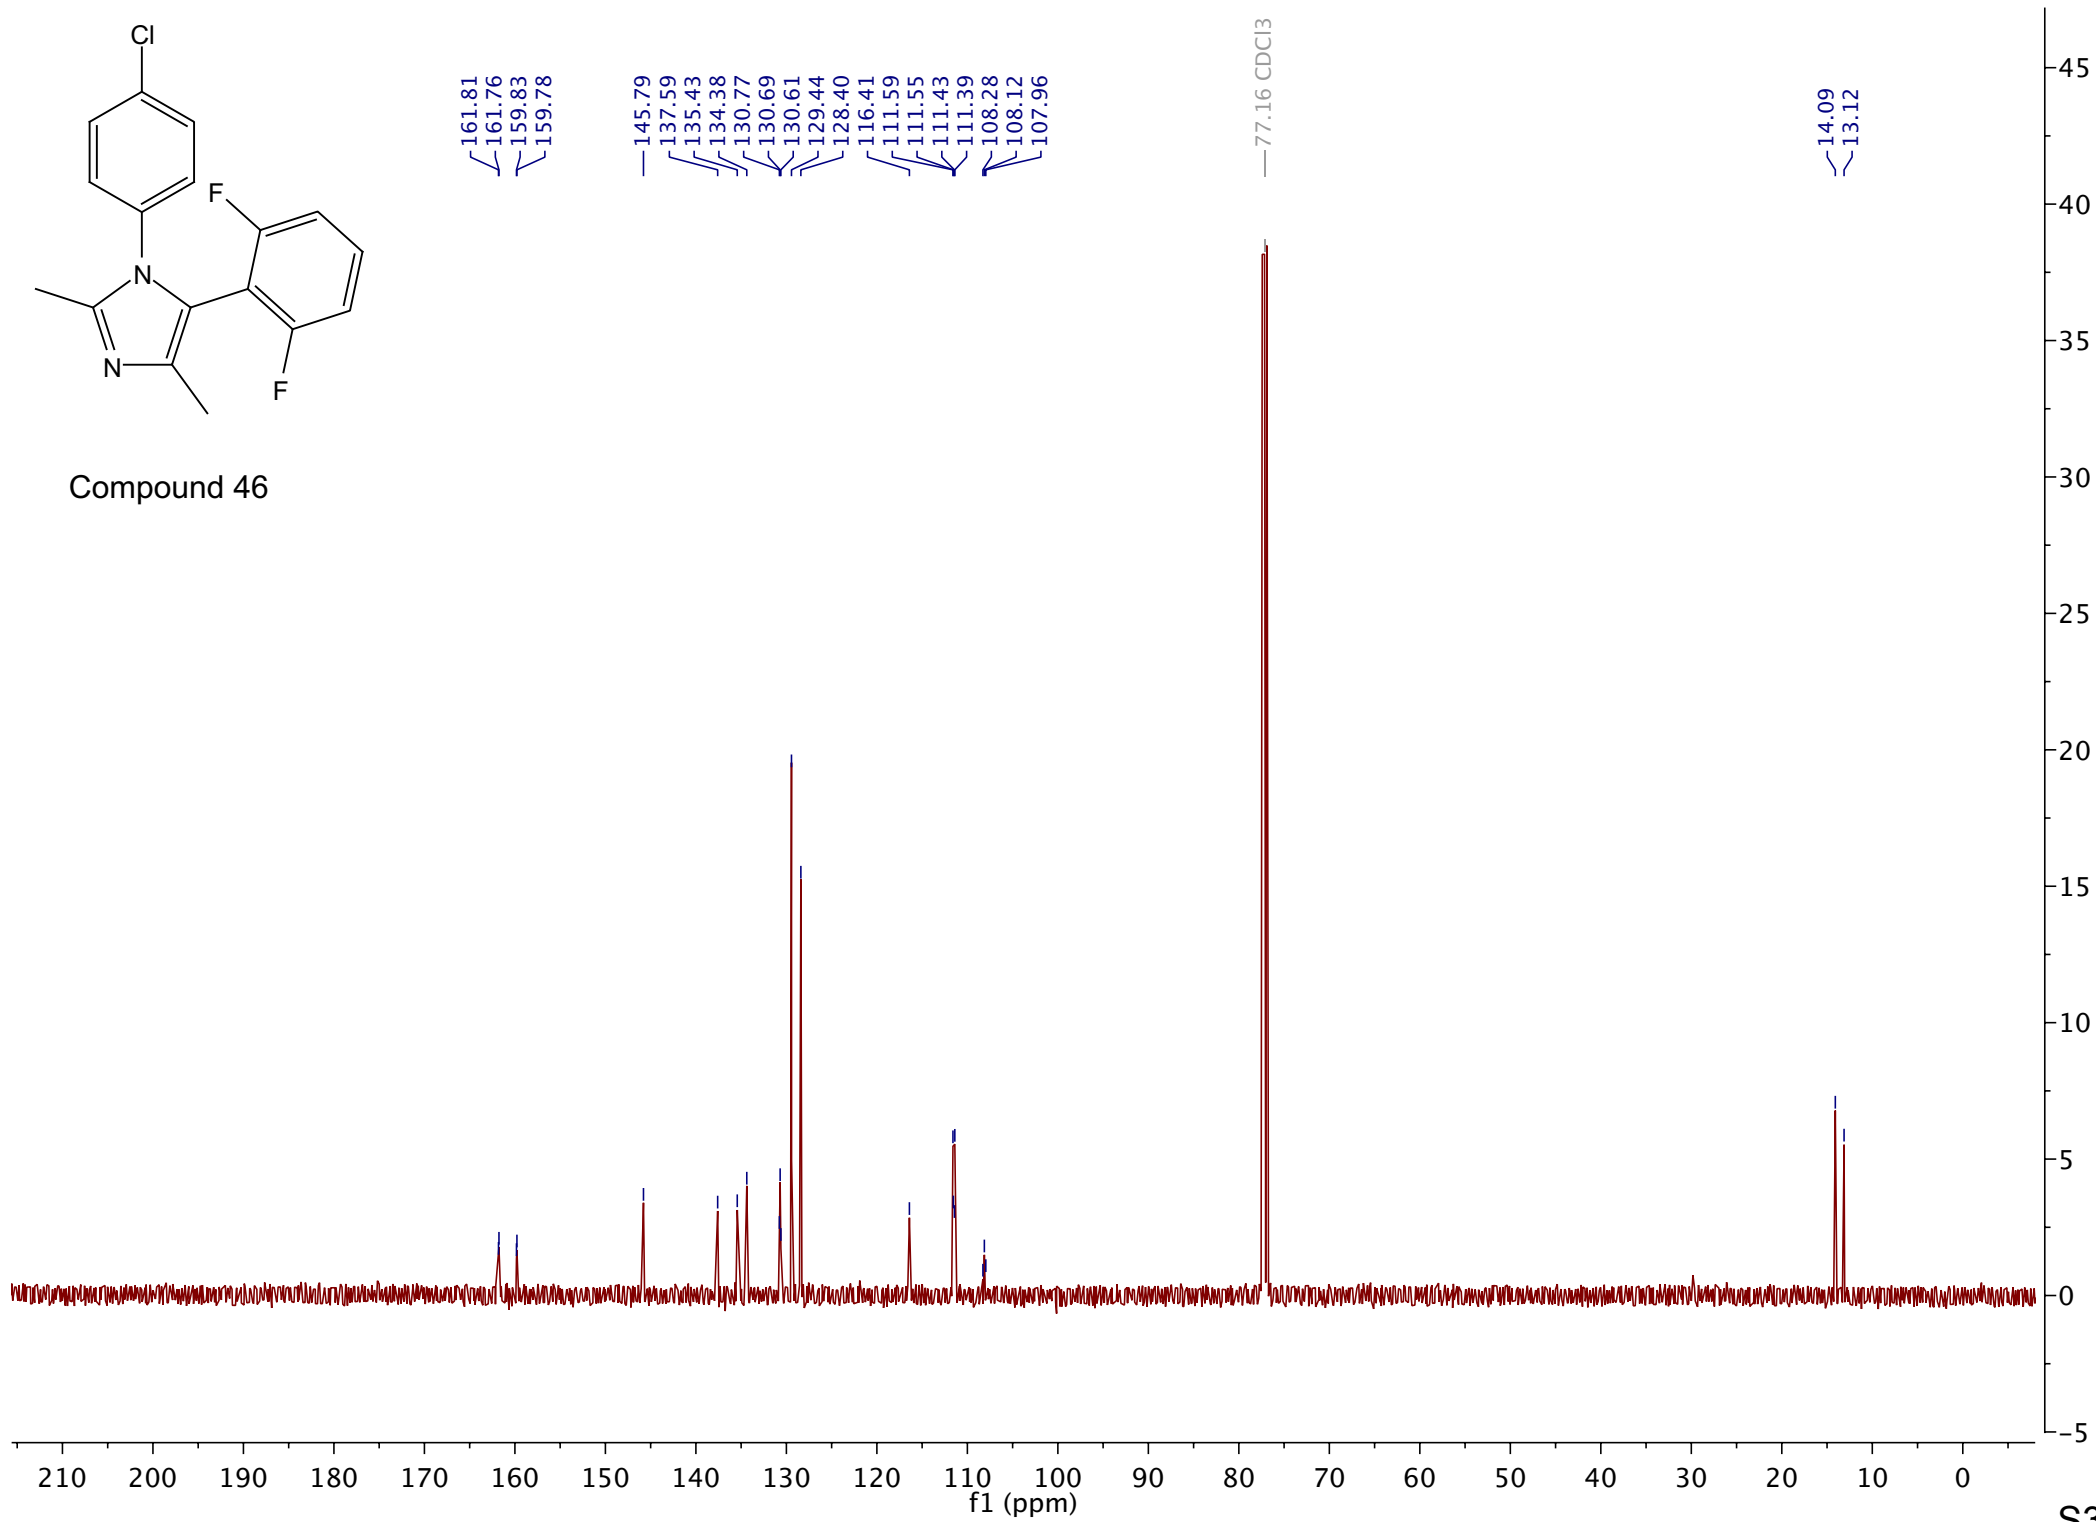

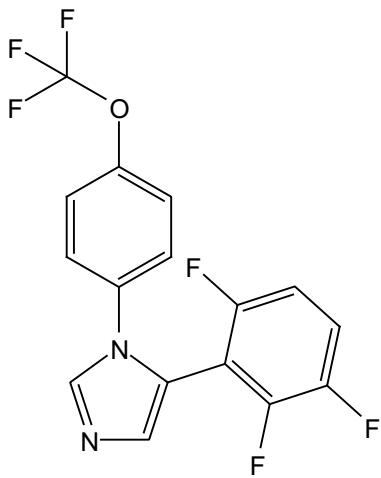

Compound 47

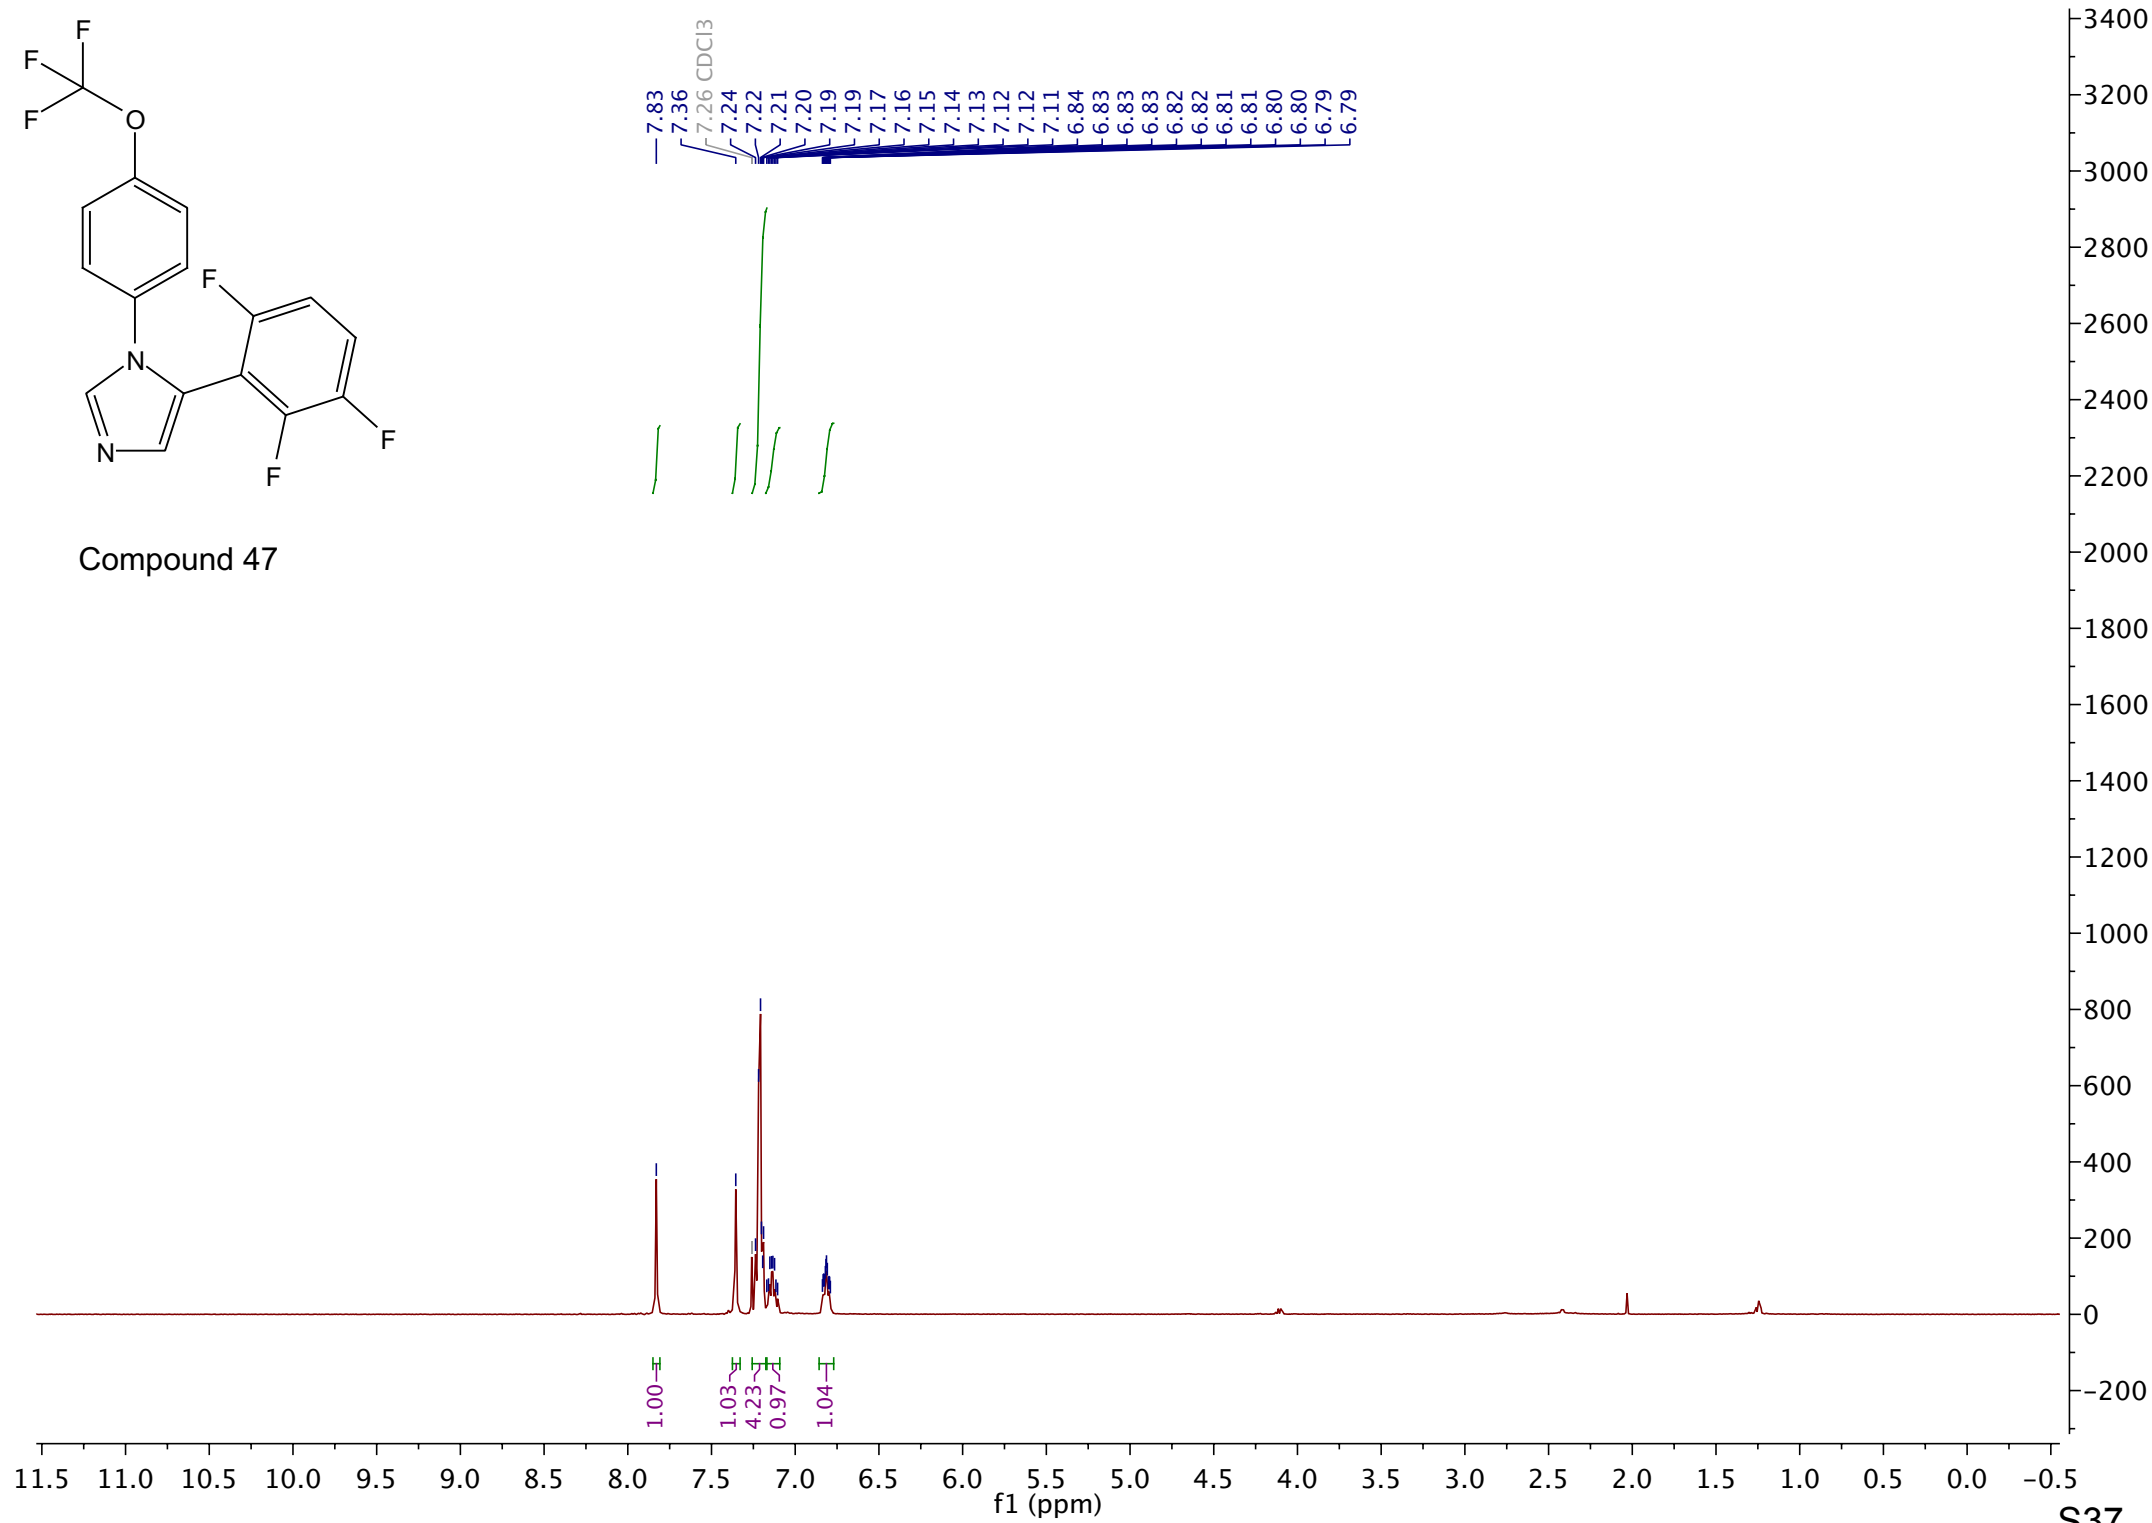

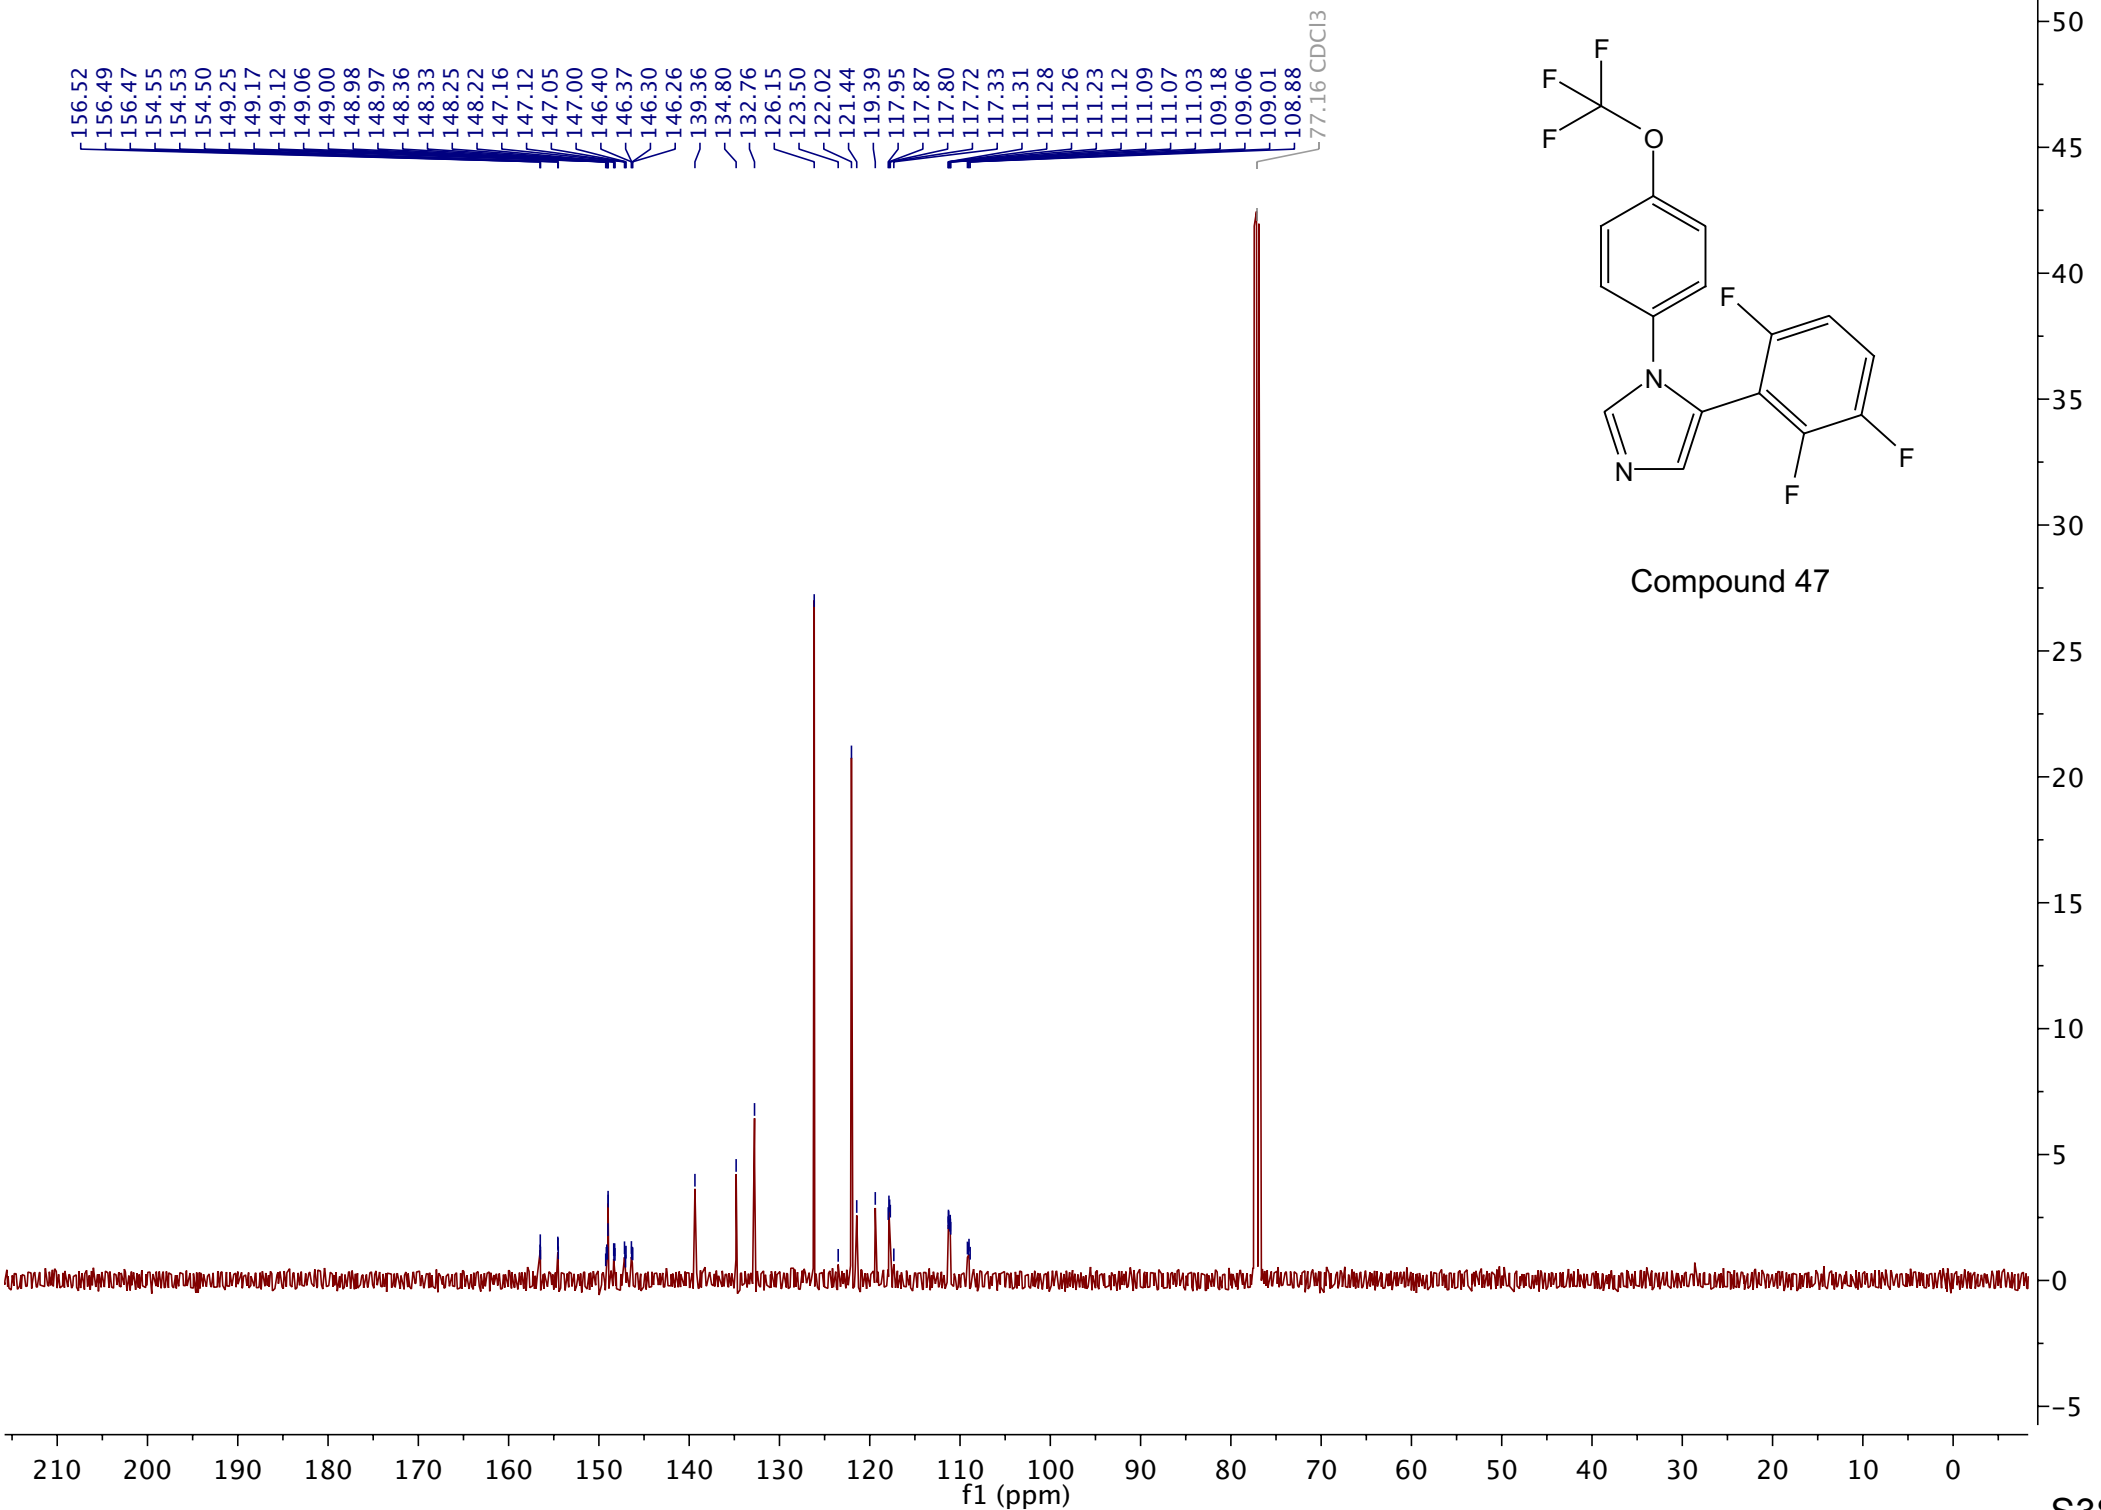

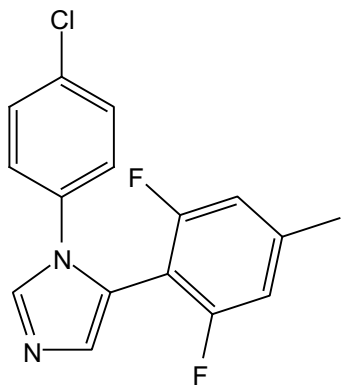

Compound 48

7.76  
7.32  
7.30  
7.26 CDCl3  
7.26  
7.09  
7.07  
6.68  
6.66

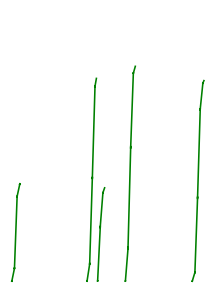

2.32

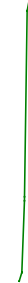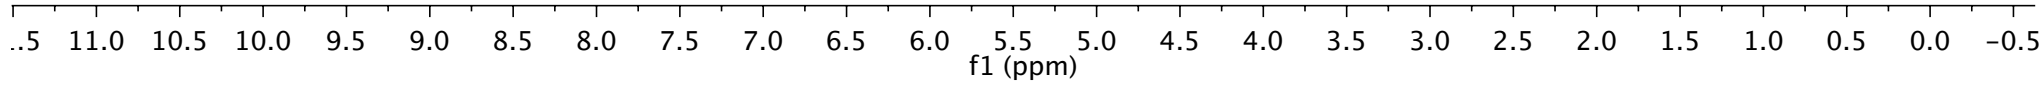

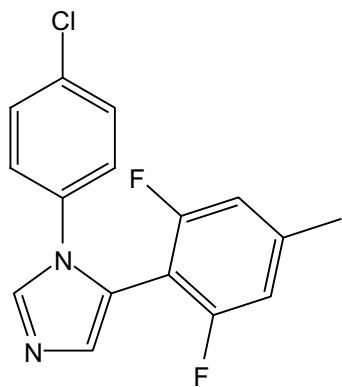

Compound 48

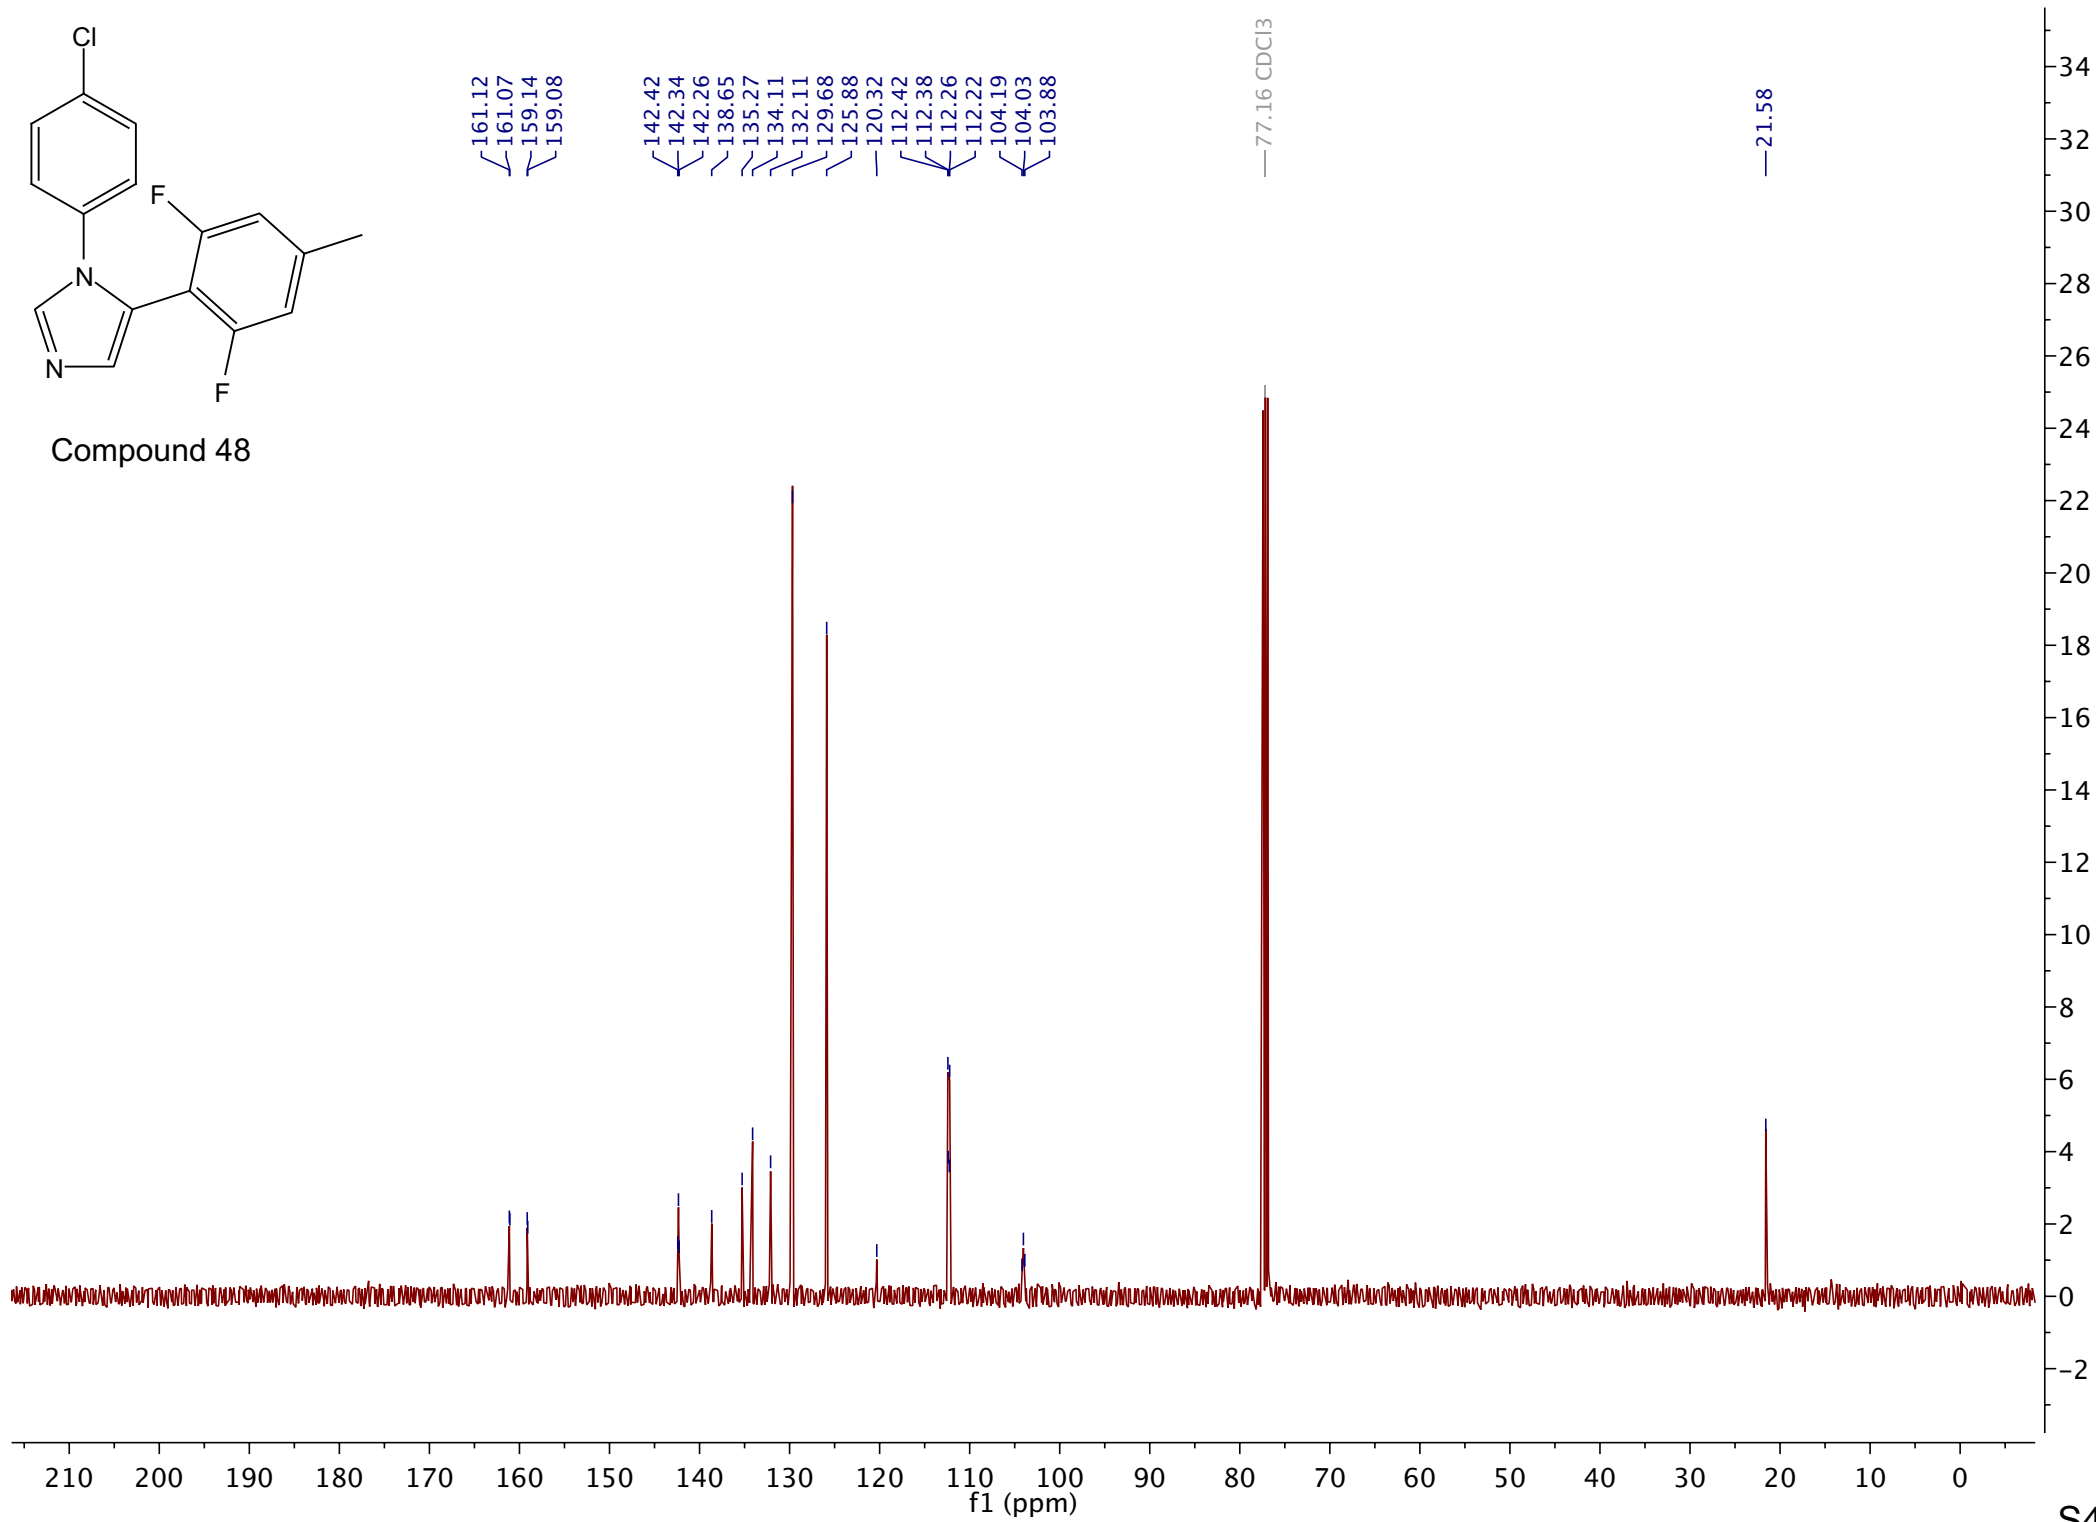



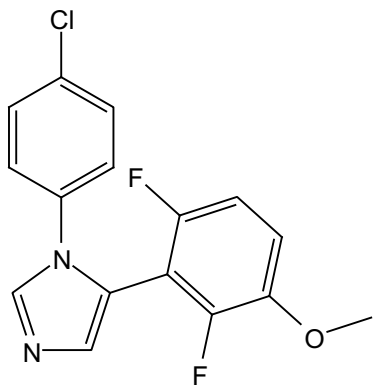

Compound 49

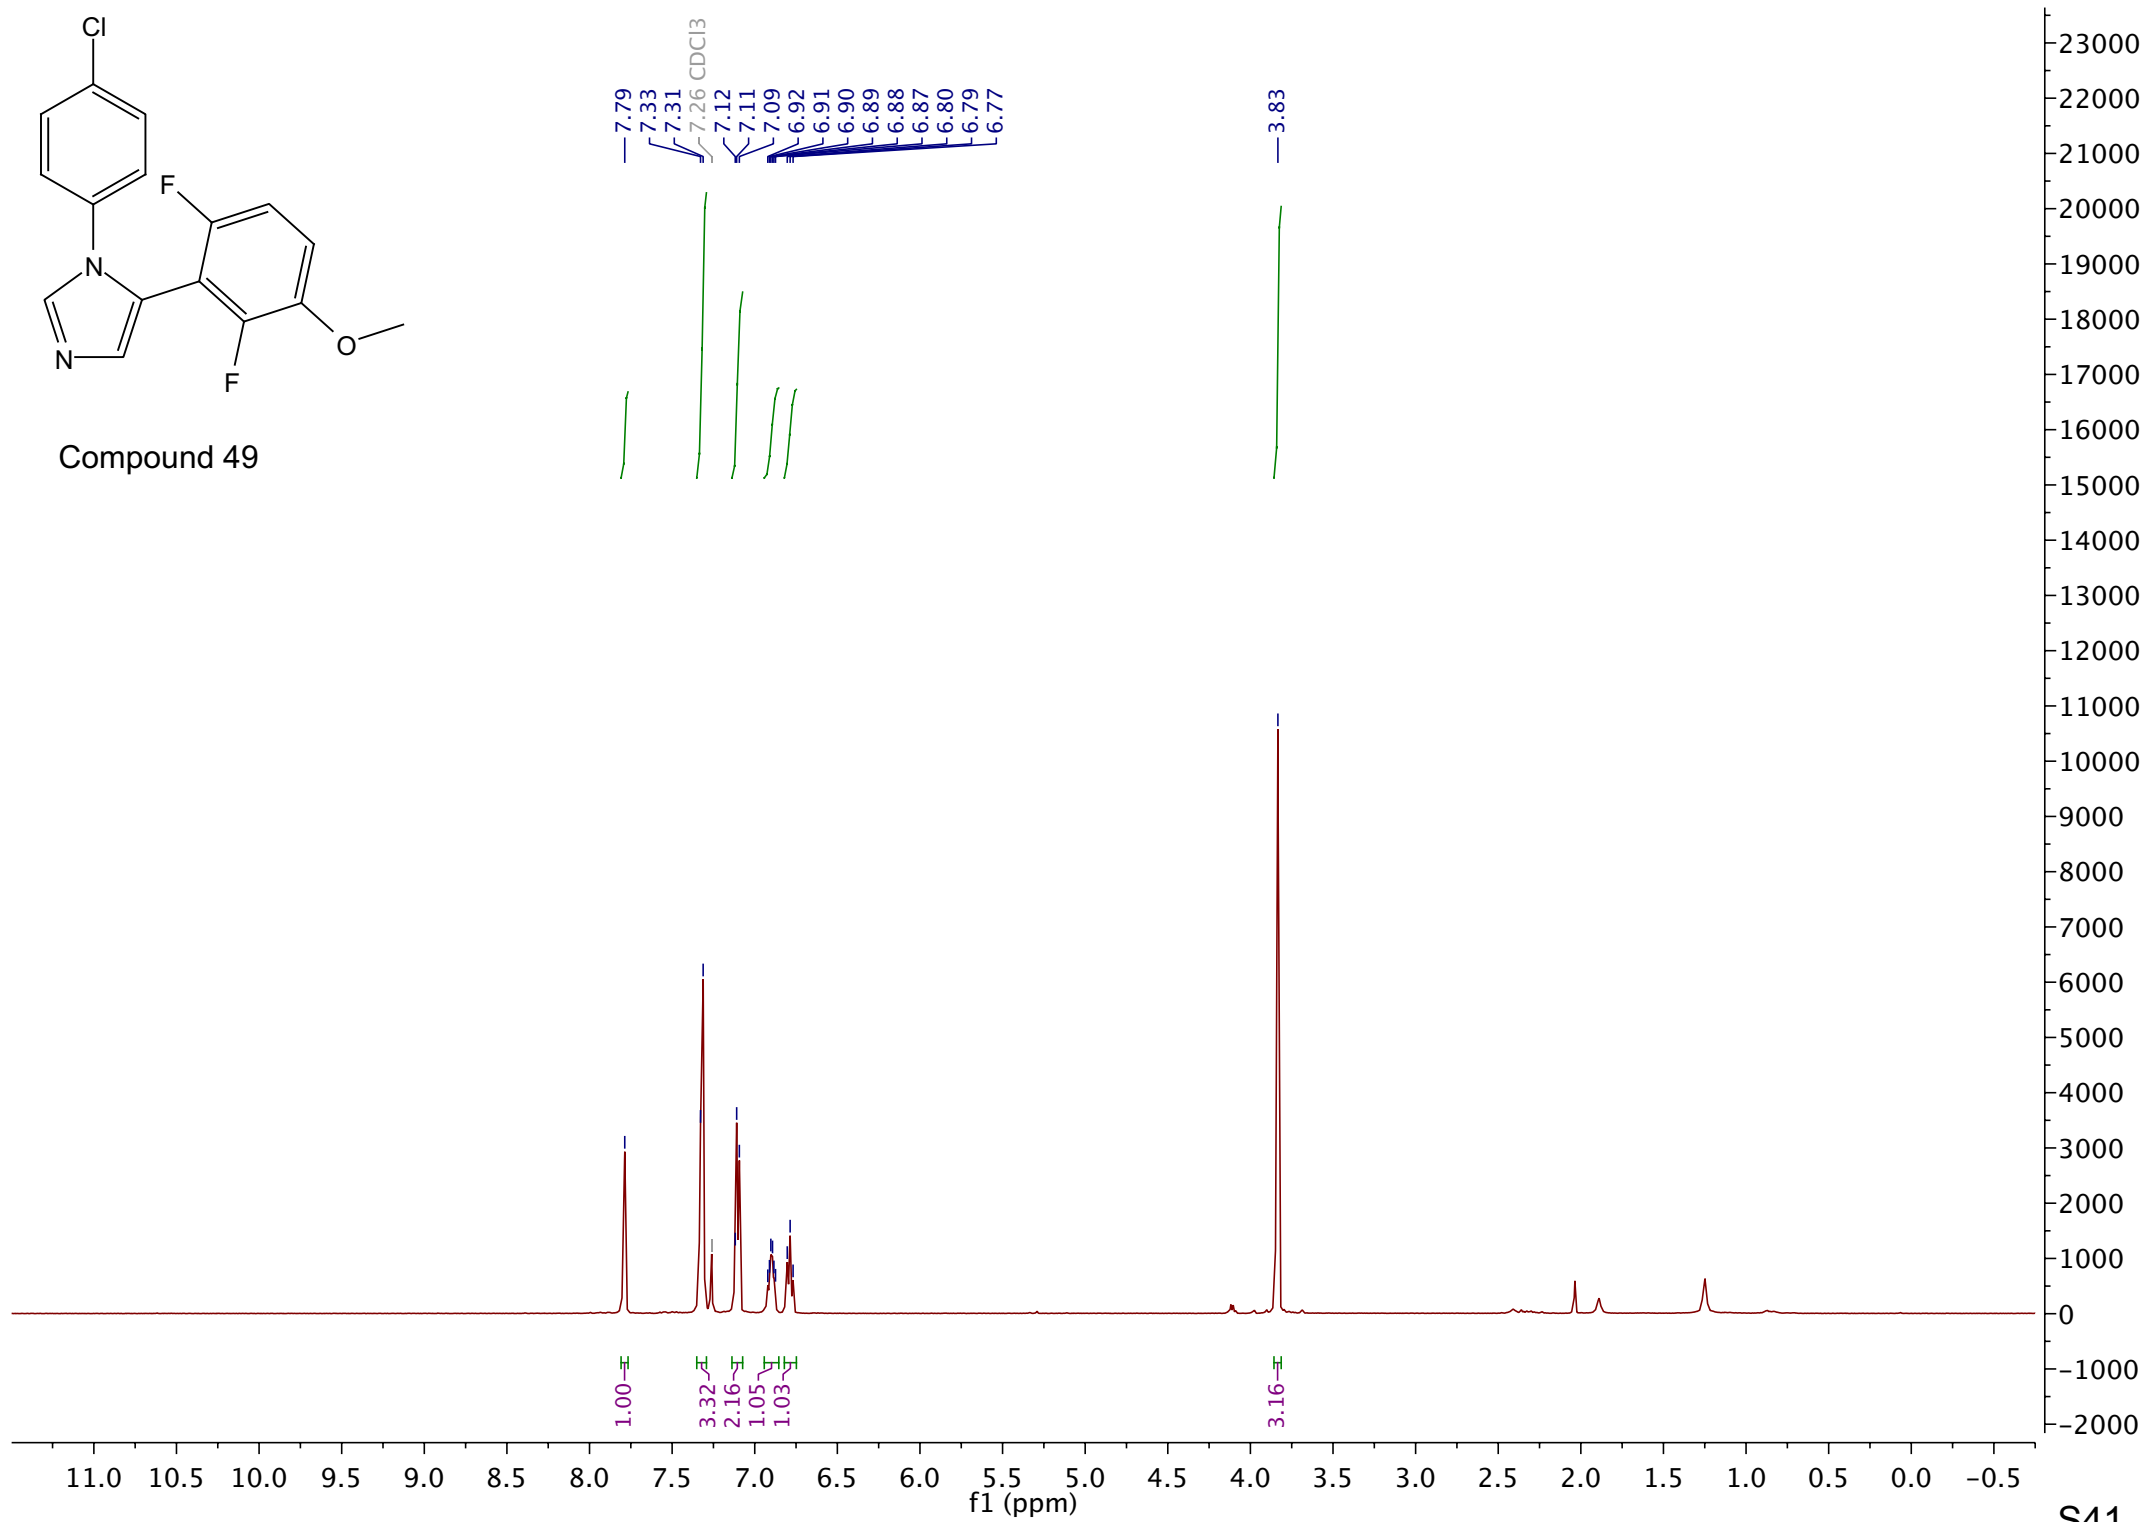

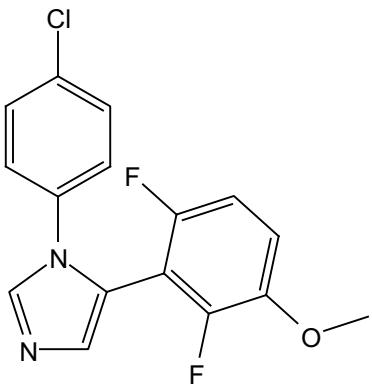

Compound 49

154.70  
154.67  
152.76  
152.73  
150.76  
150.71  
148.77  
148.72  
144.58  
144.55  
144.49  
144.47  
138.92  
135.18  
134.20  
132.42  
129.73  
125.86  
120.12  
113.99  
113.96  
113.91  
113.89  
110.50  
110.47  
110.32  
110.29  
108.23  
108.10  
108.10  
108.06  
107.93  
77.16 CDCl3  
56.86

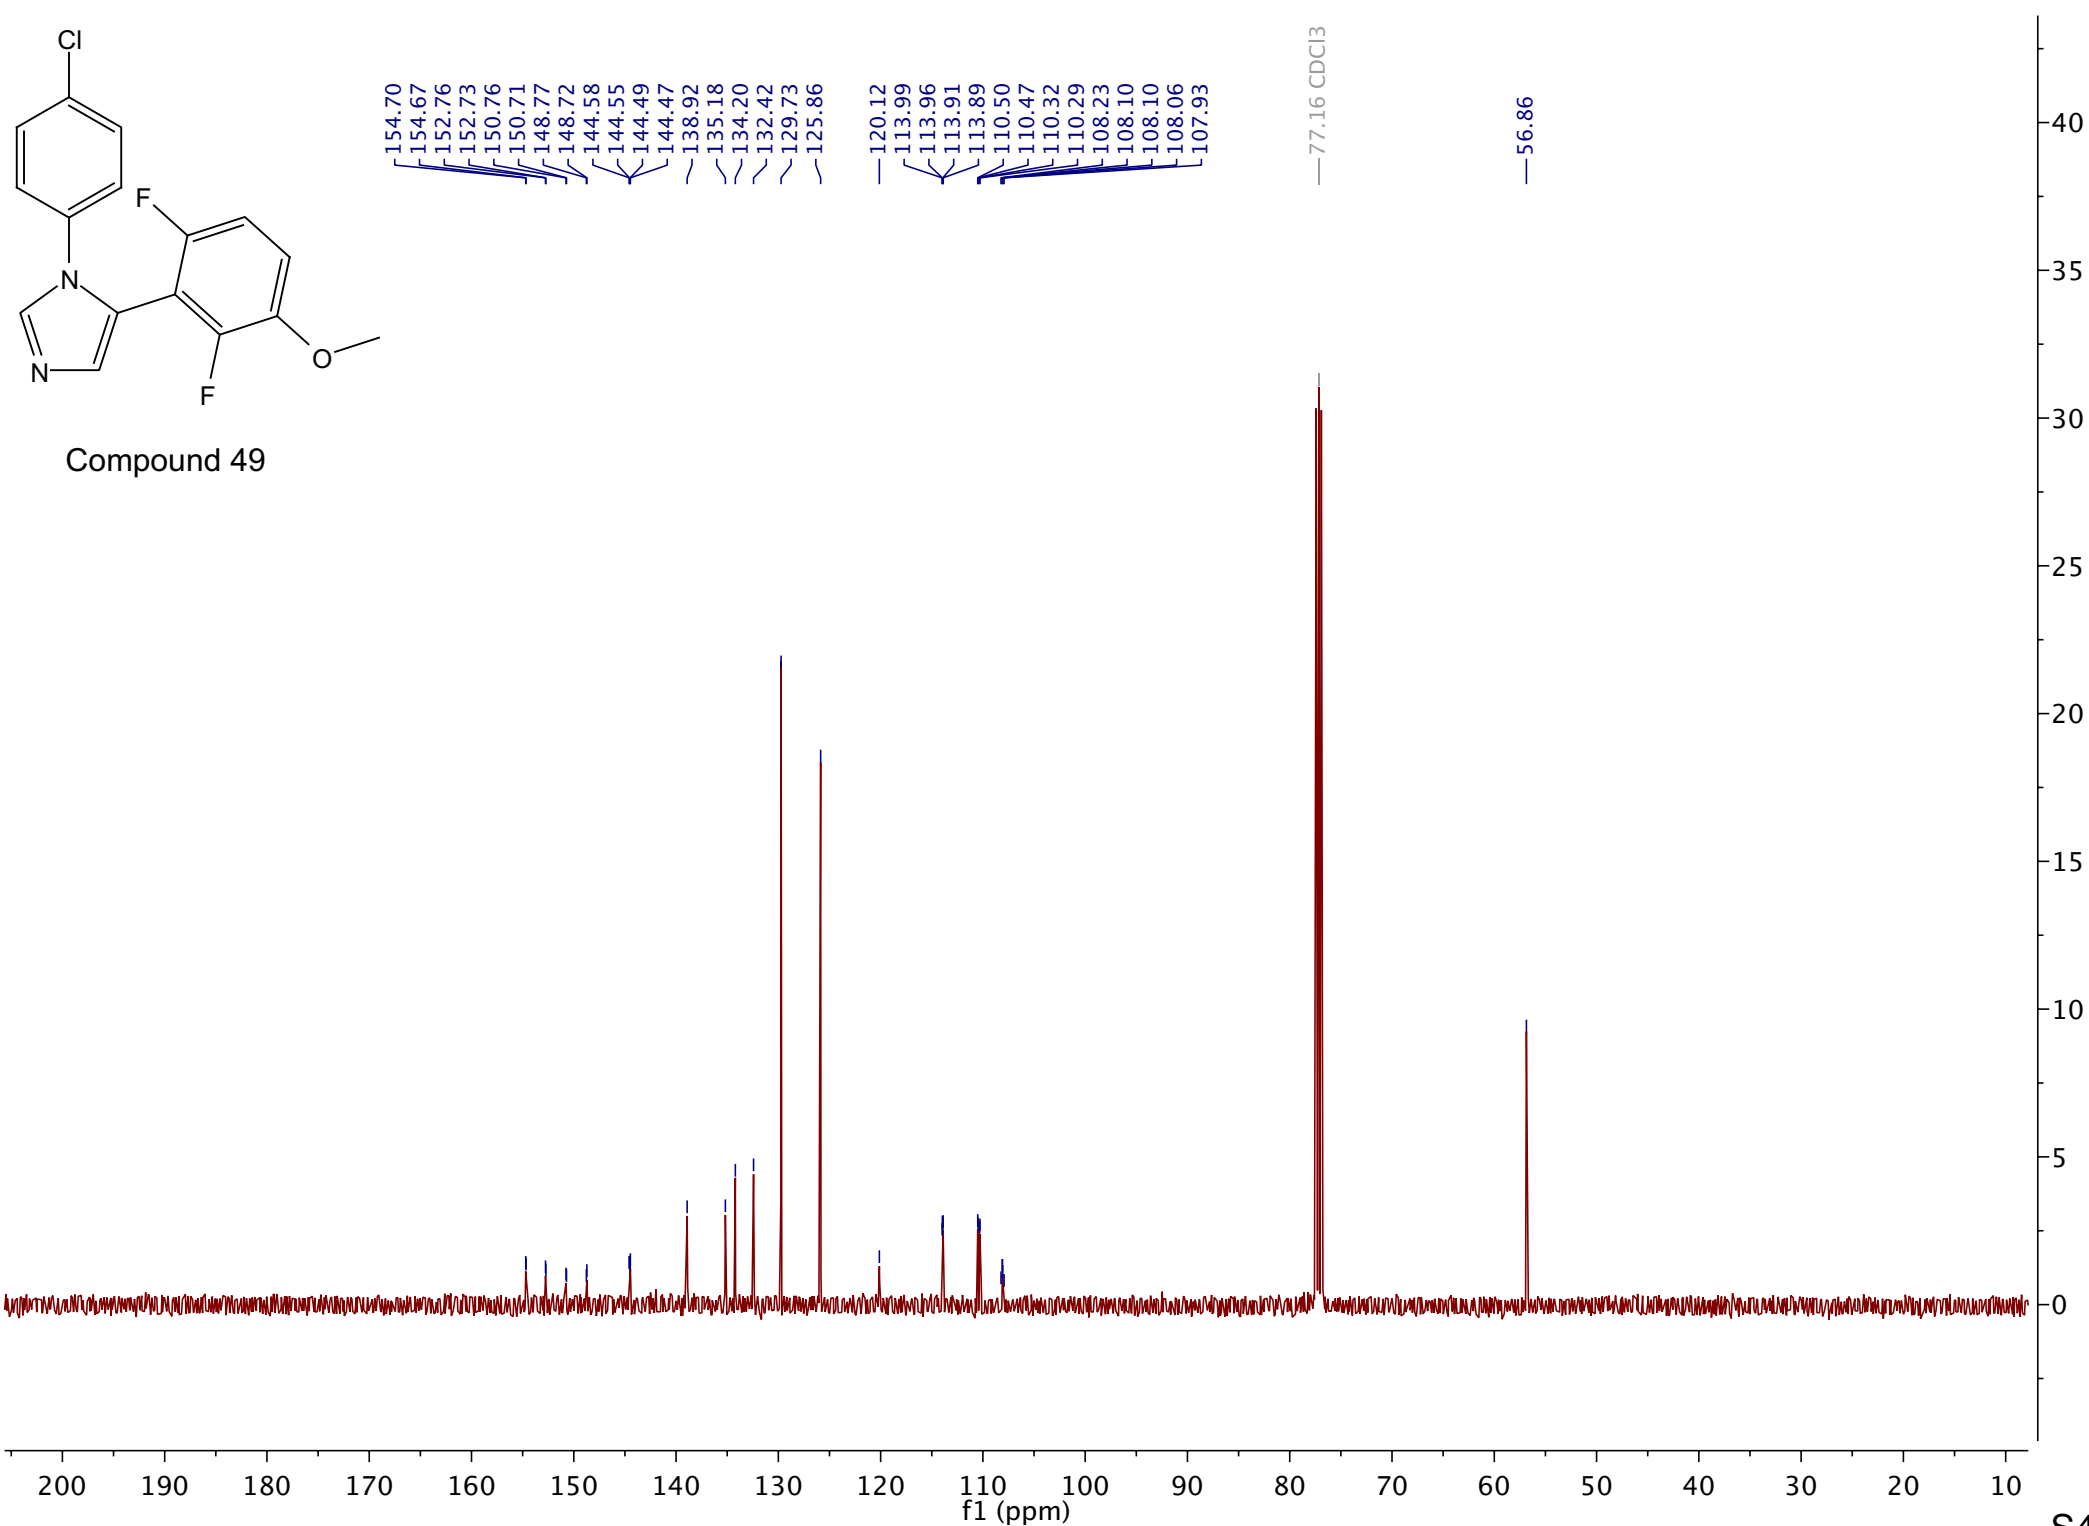

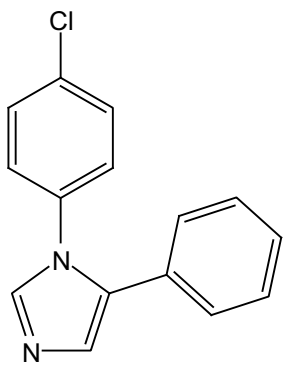

Compound 50

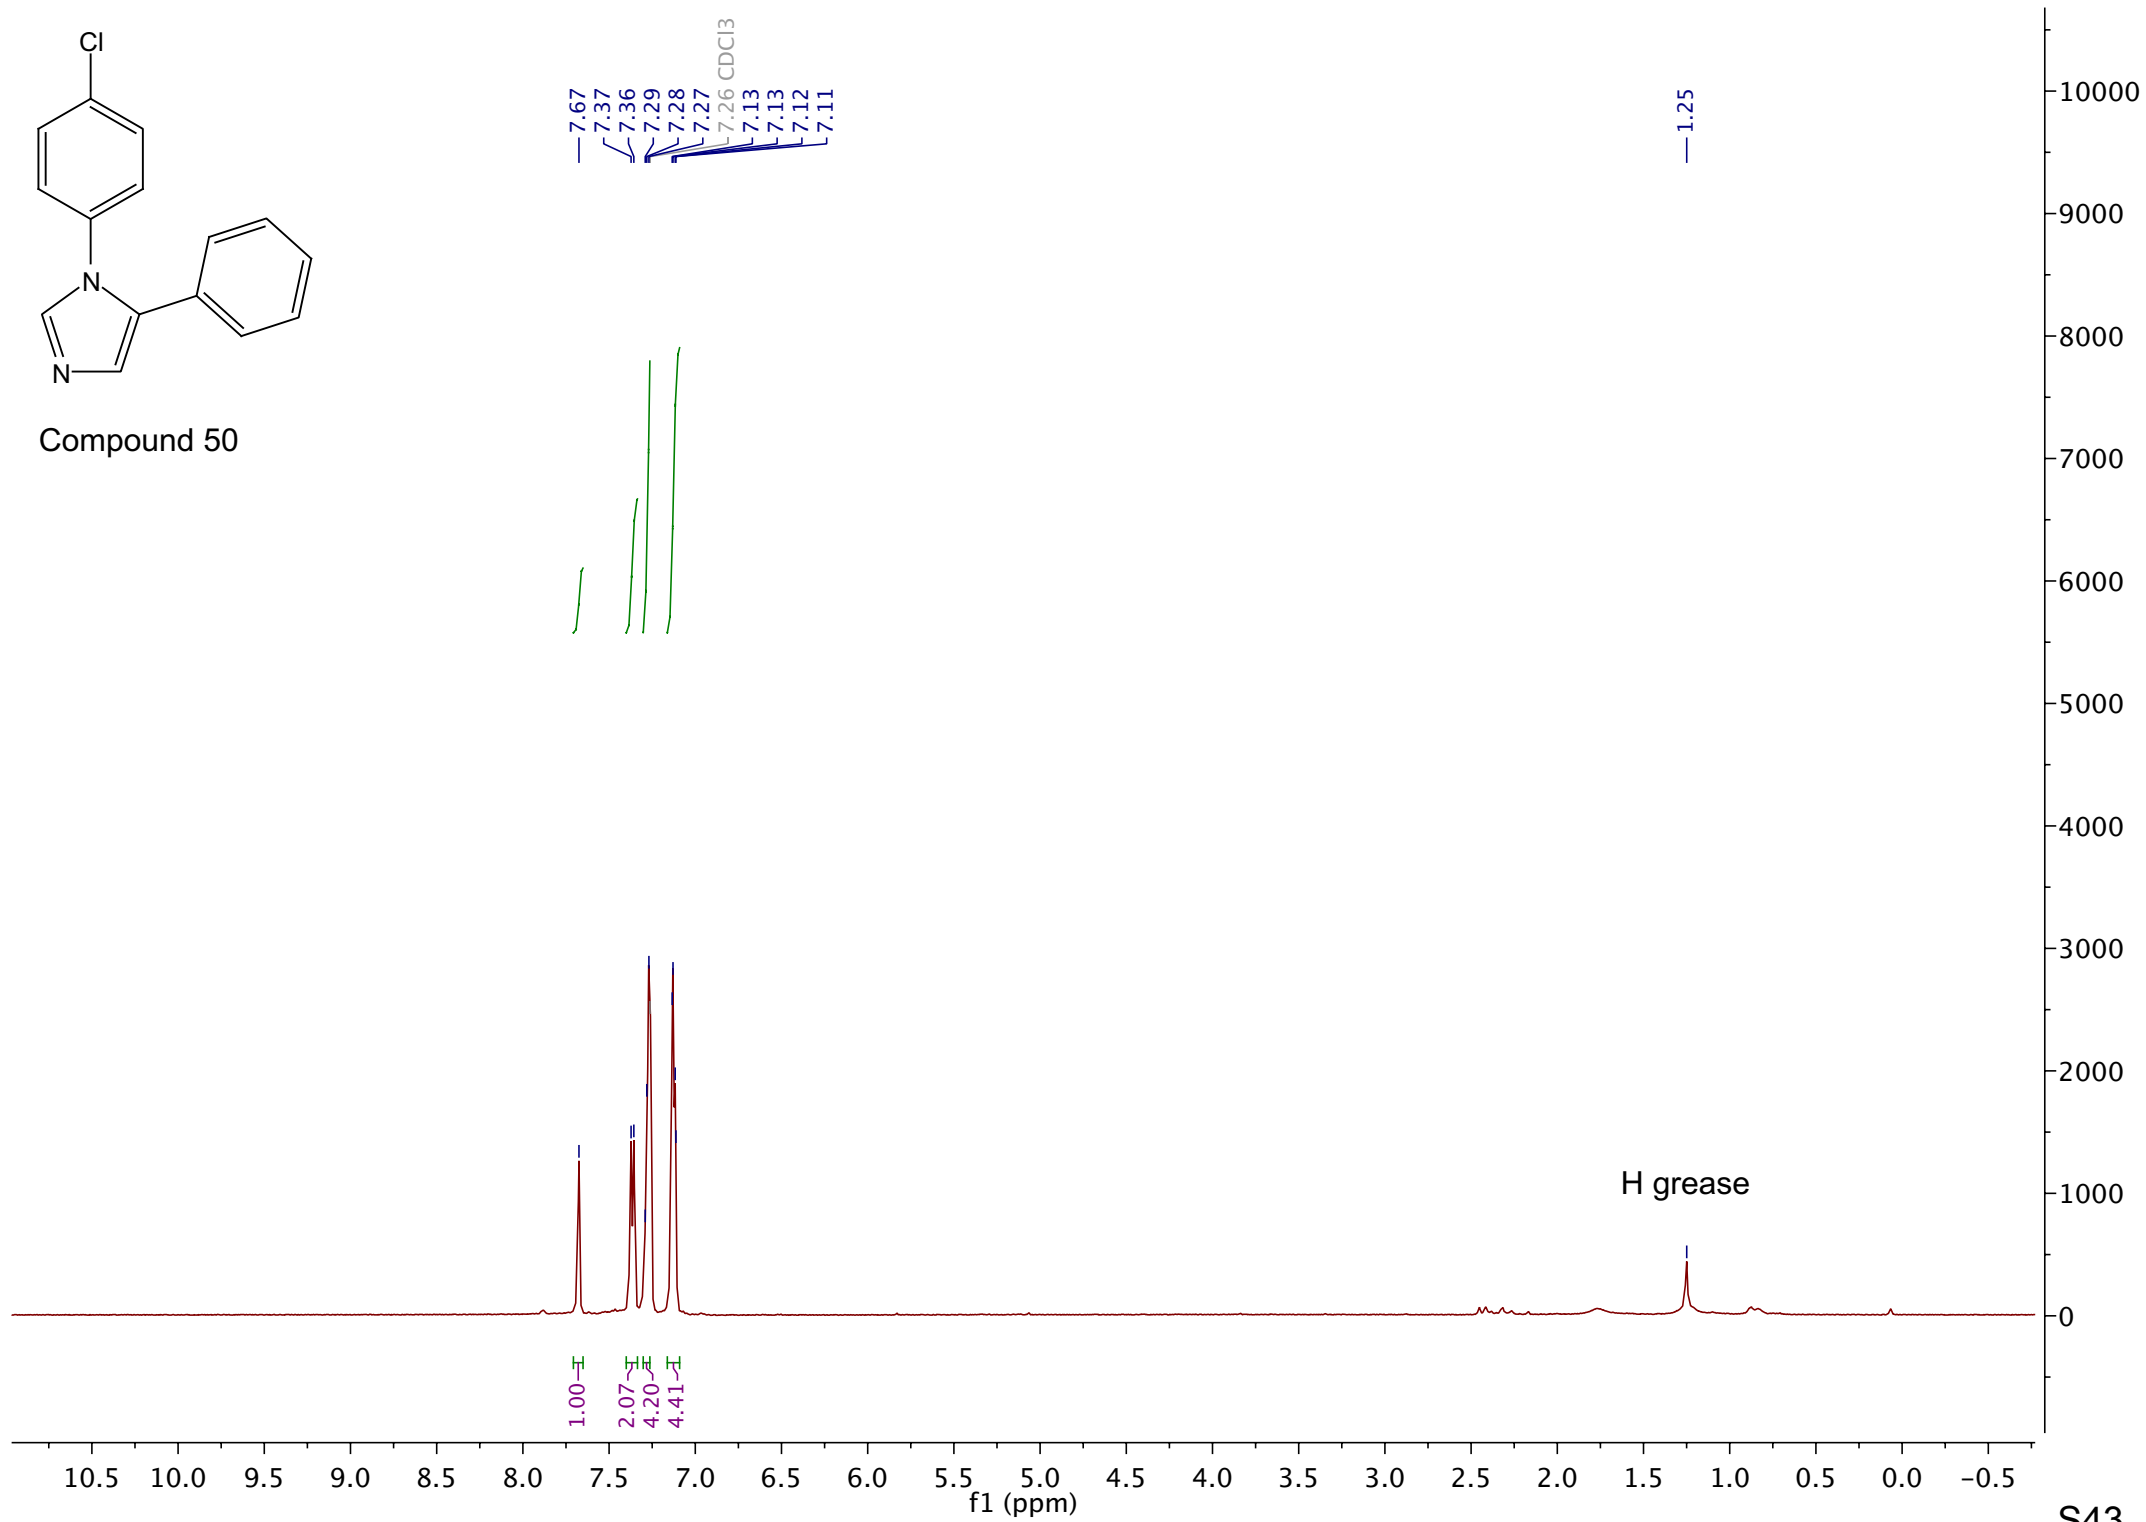

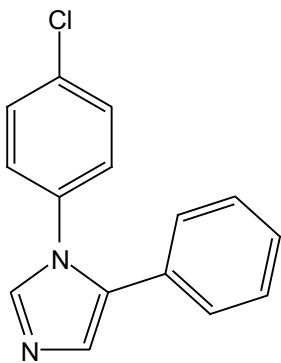

Compound 50

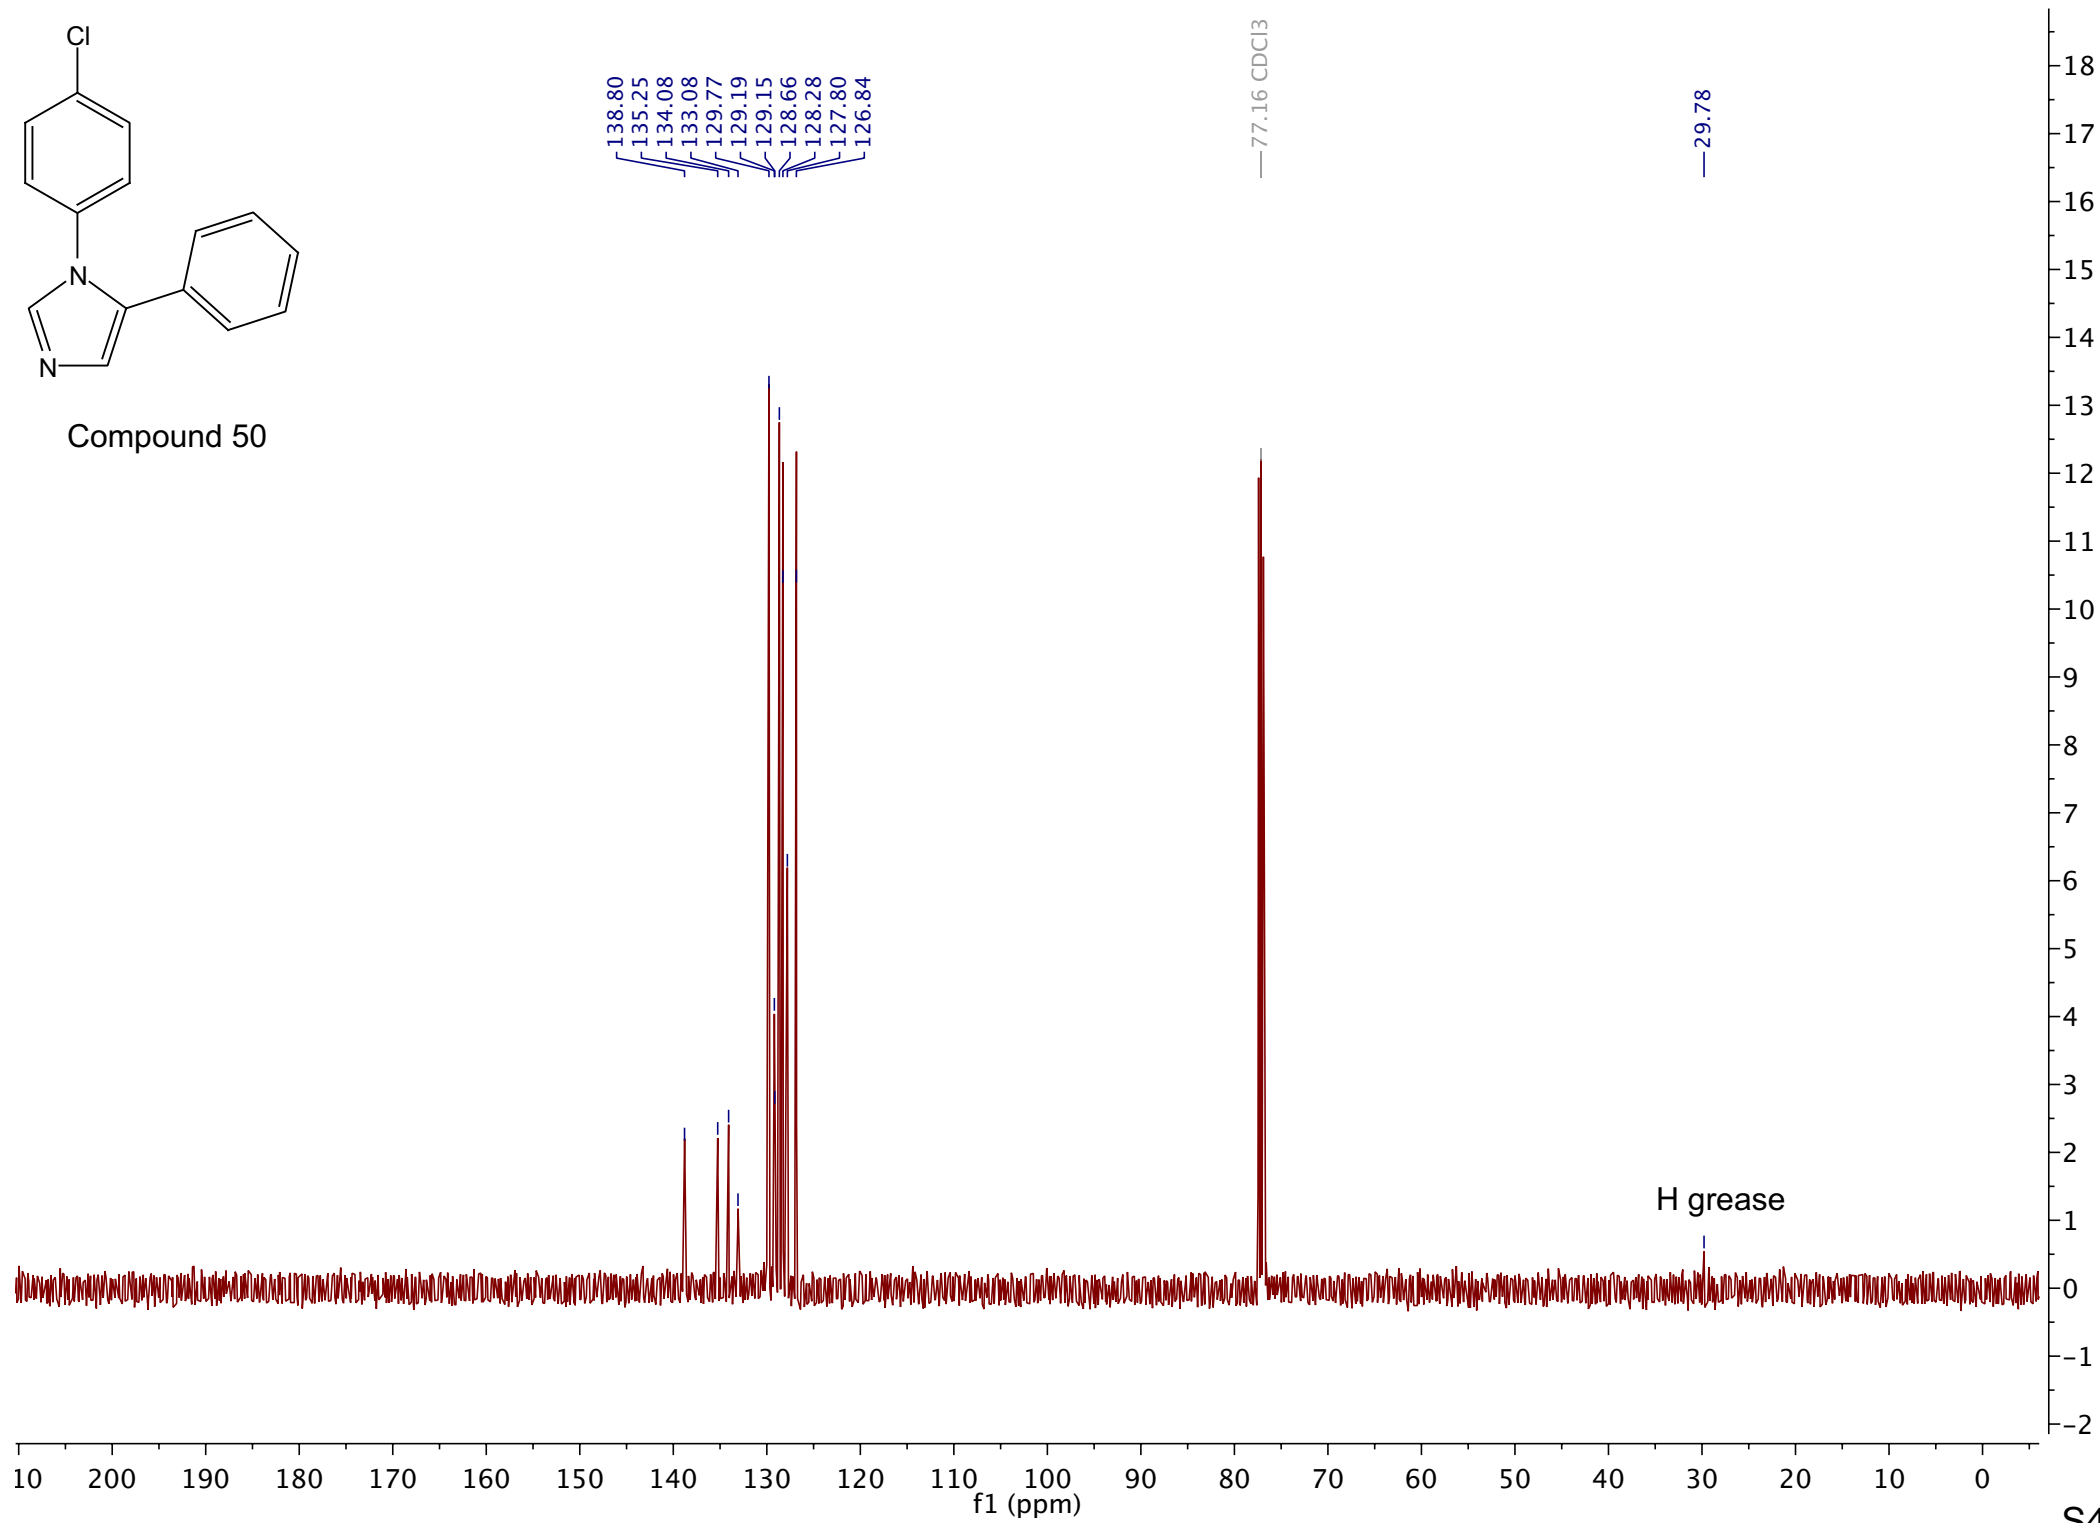

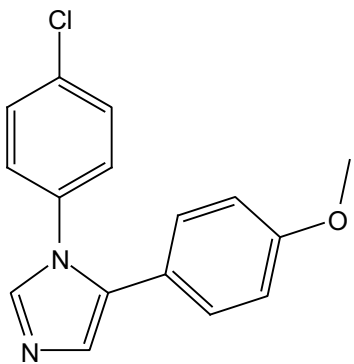

Compound 51

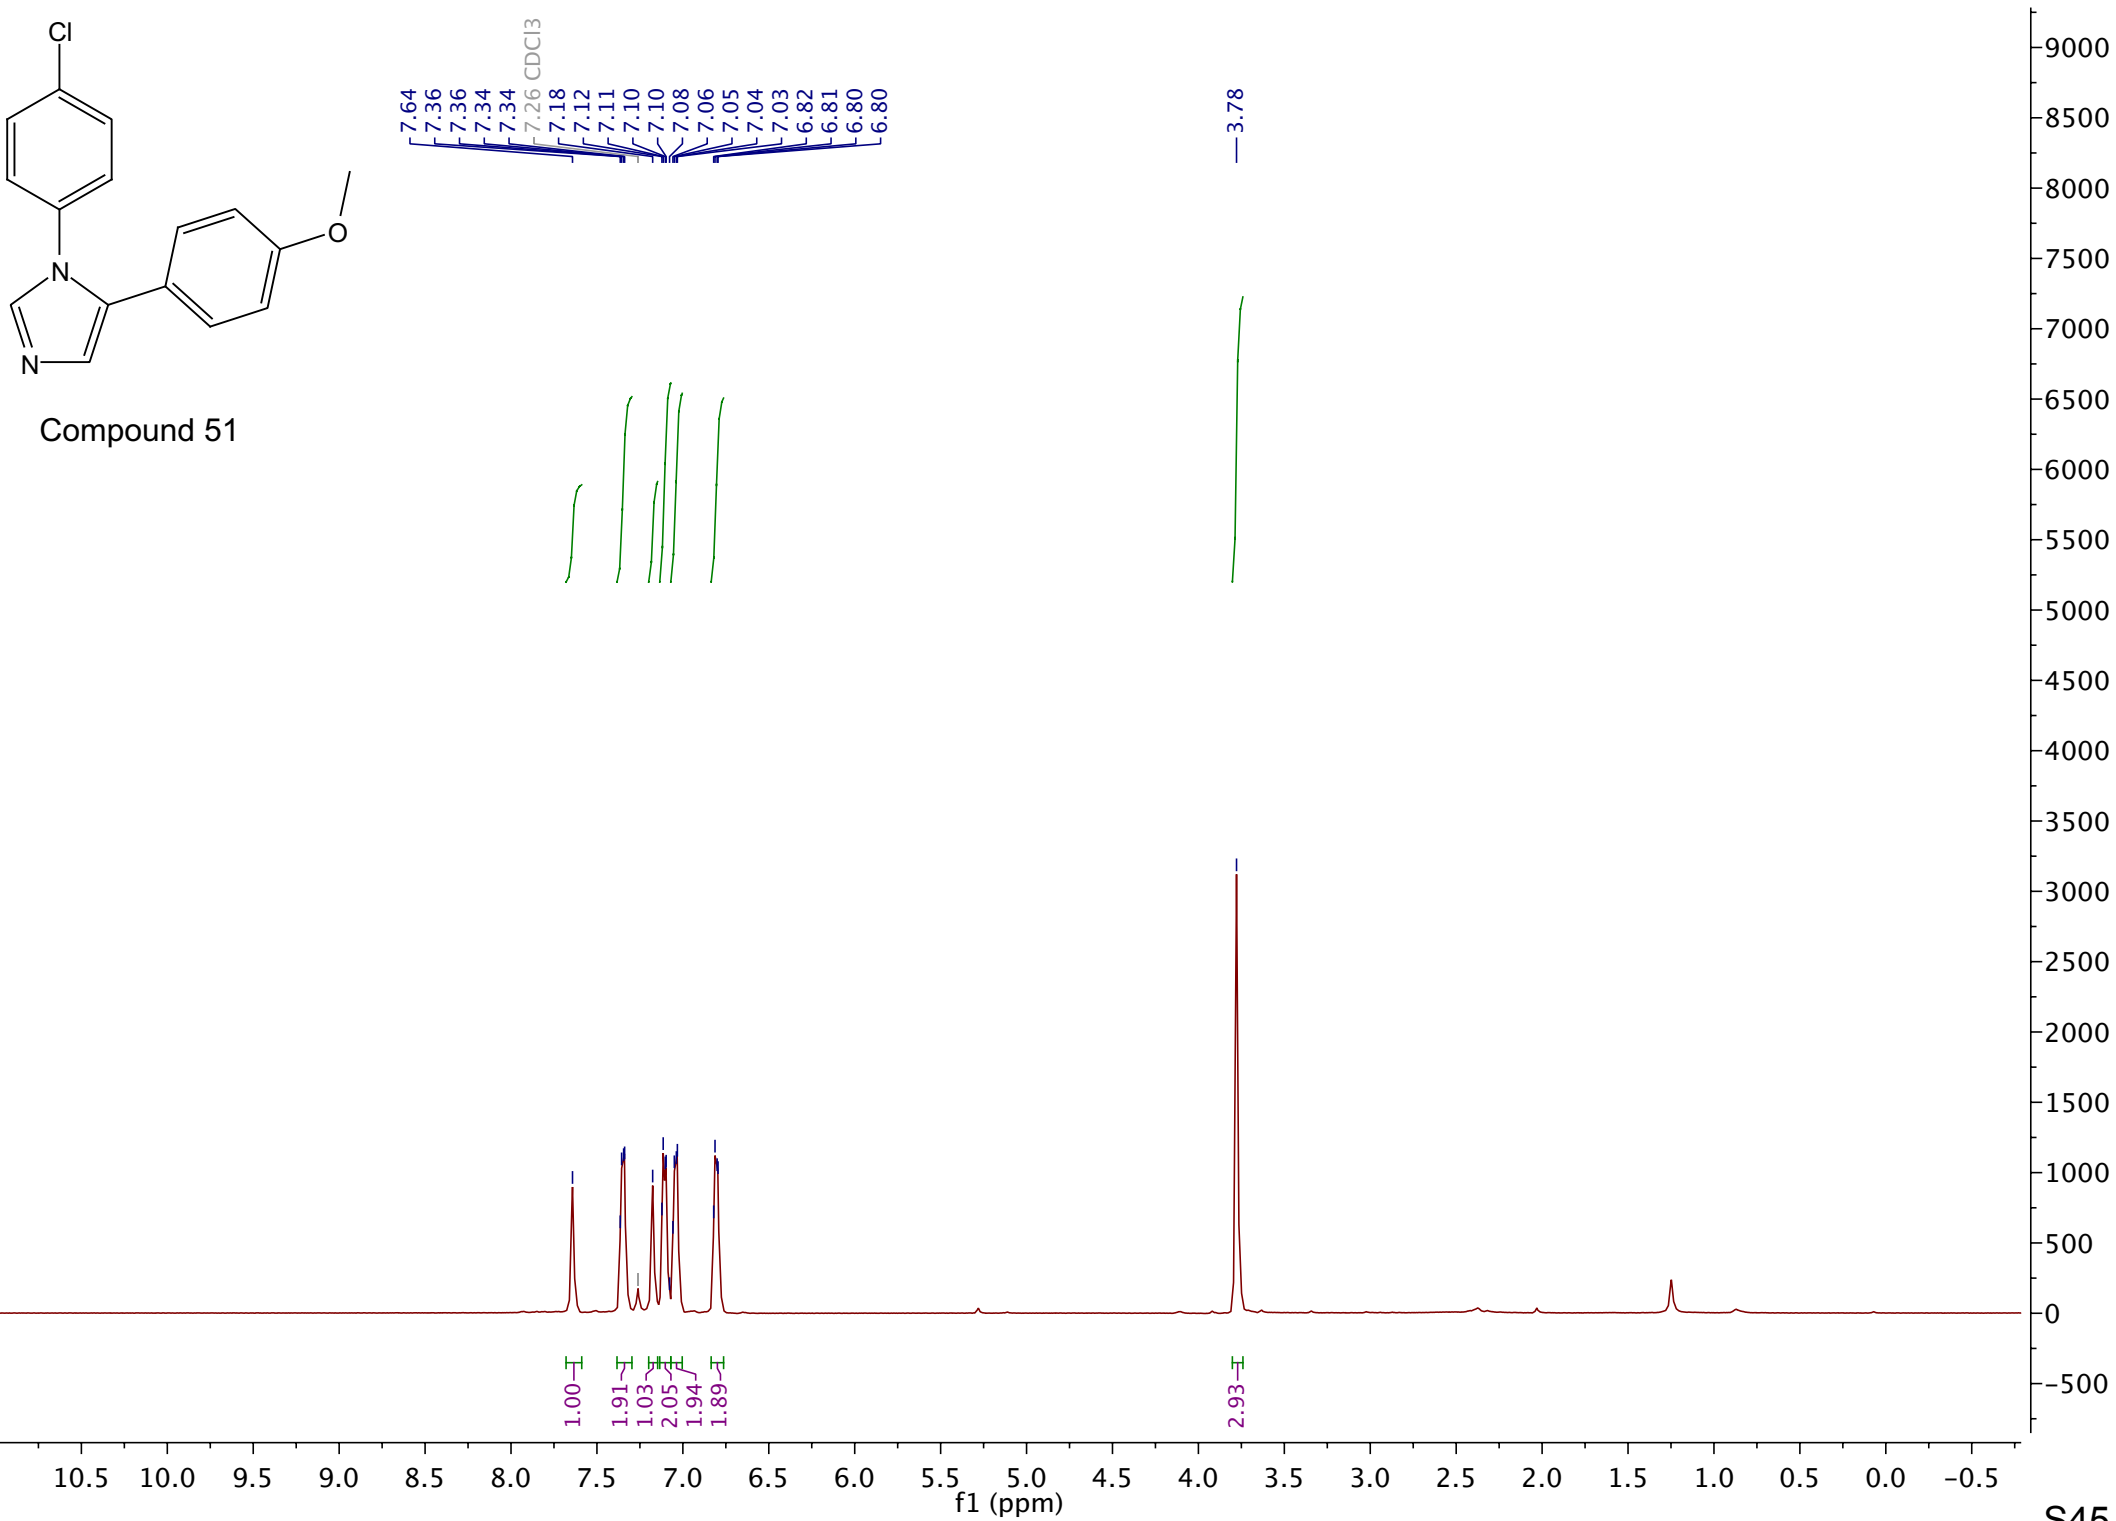

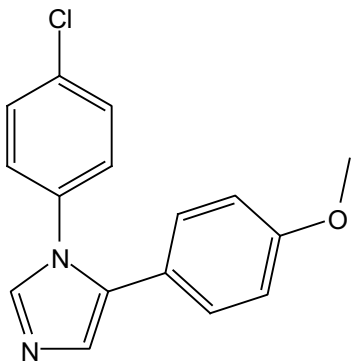

Compound 51

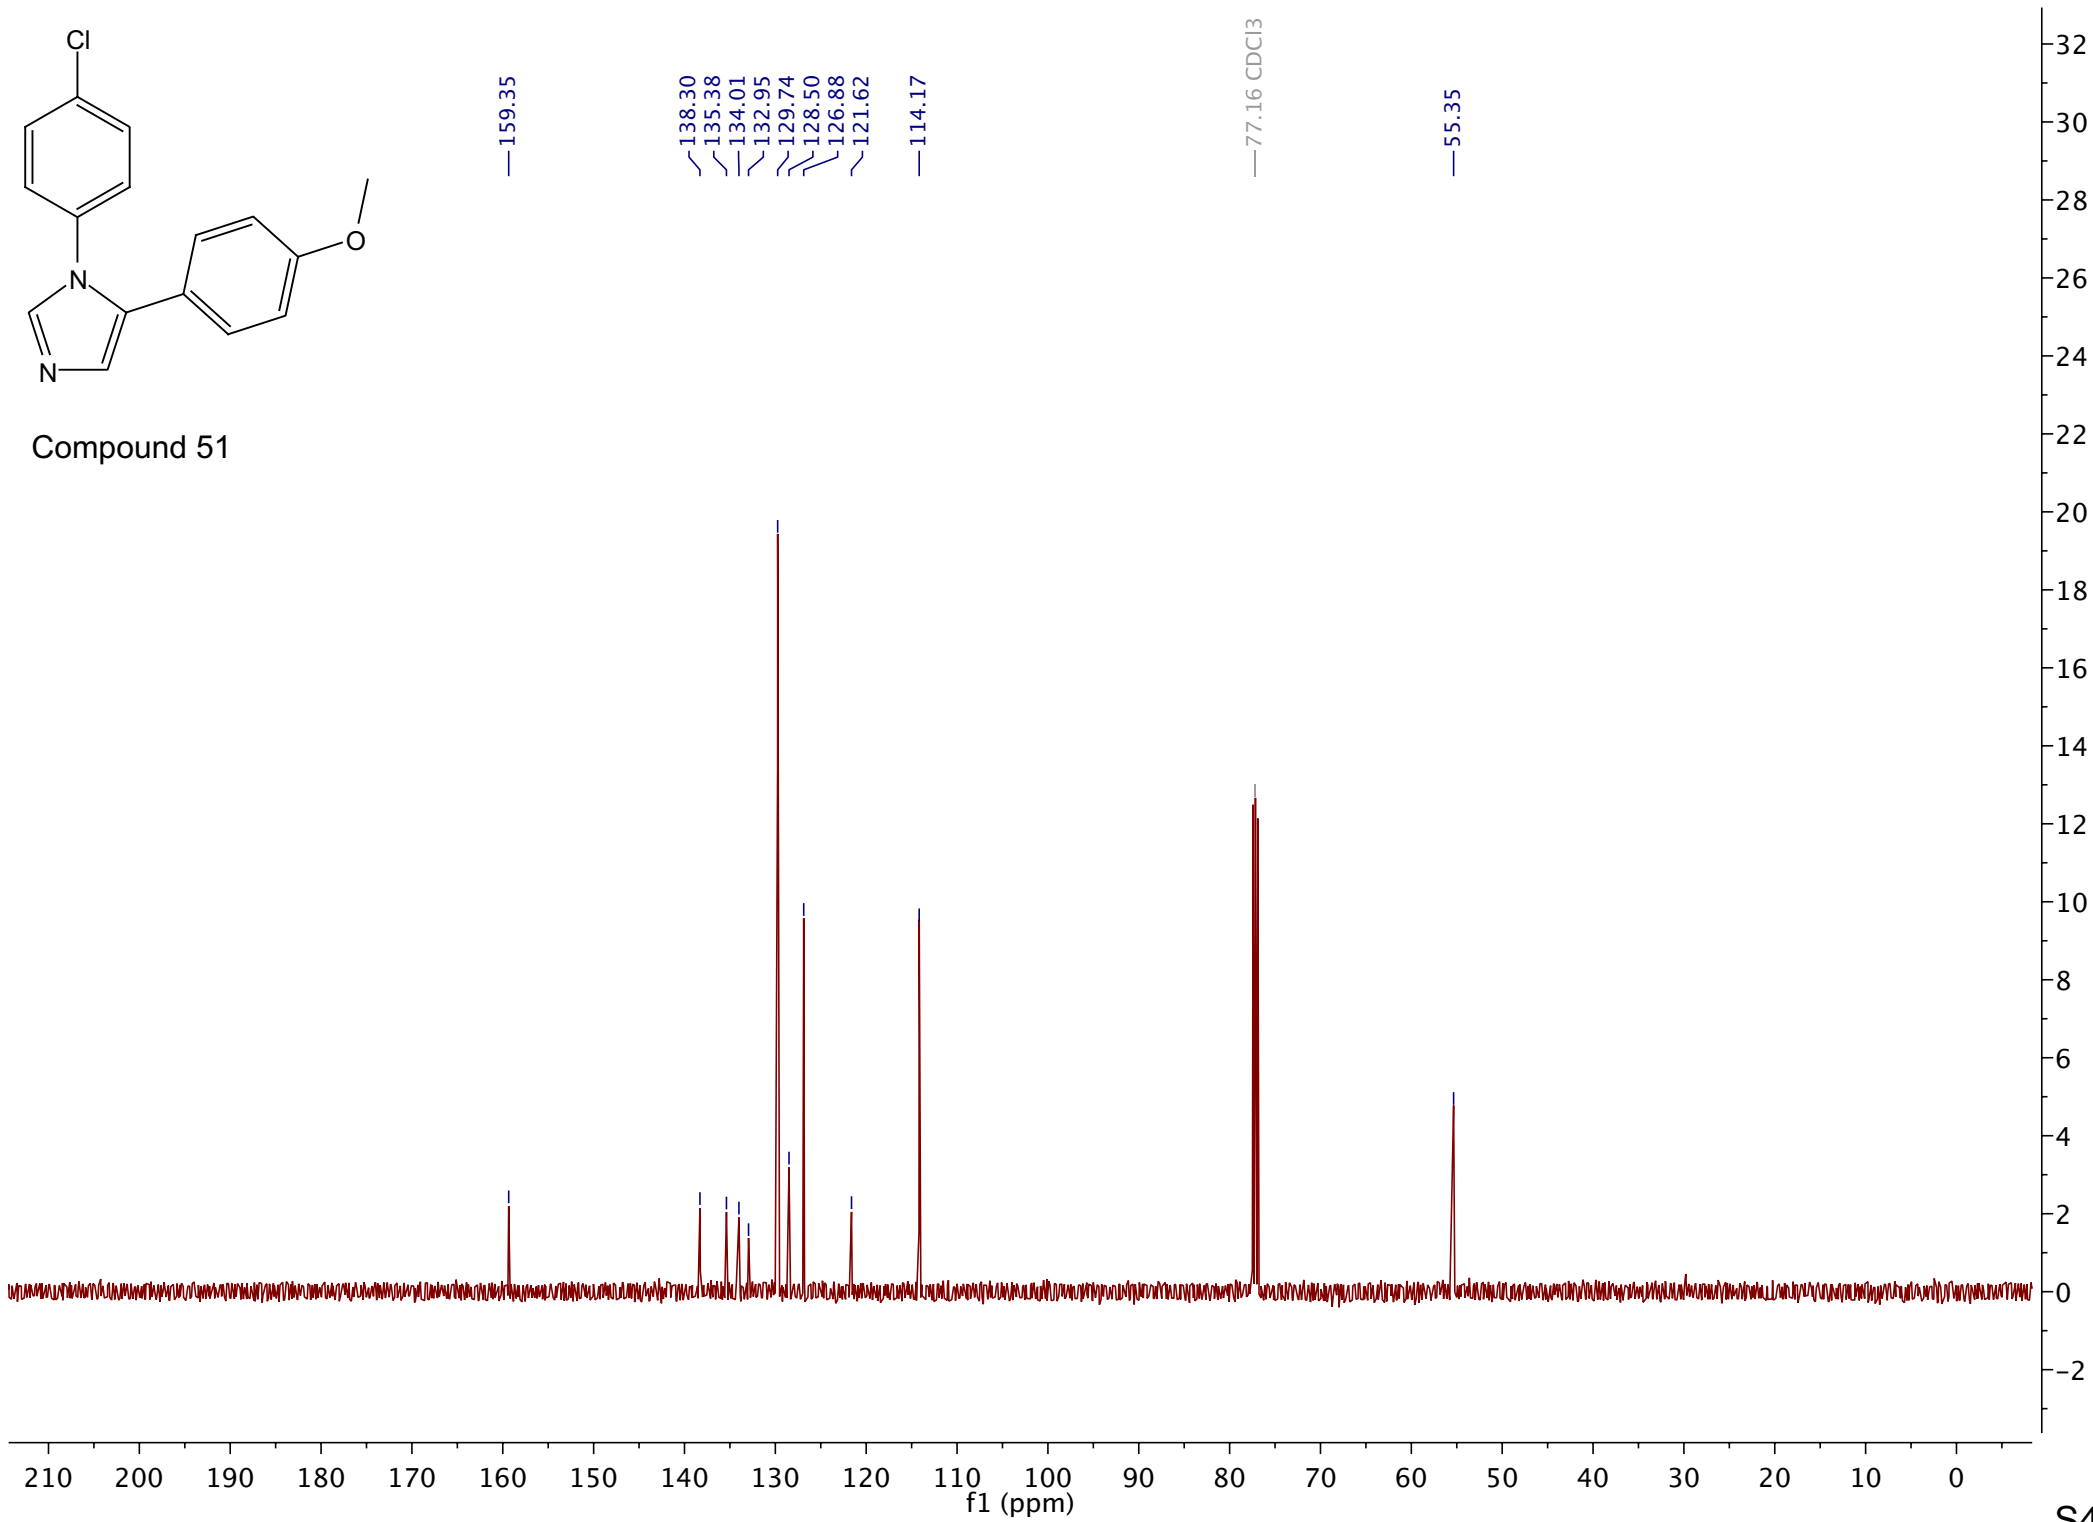

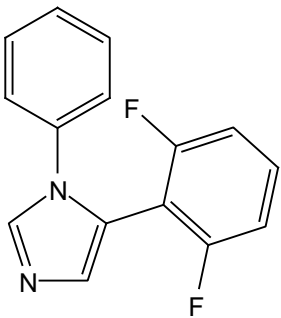

Compound 52

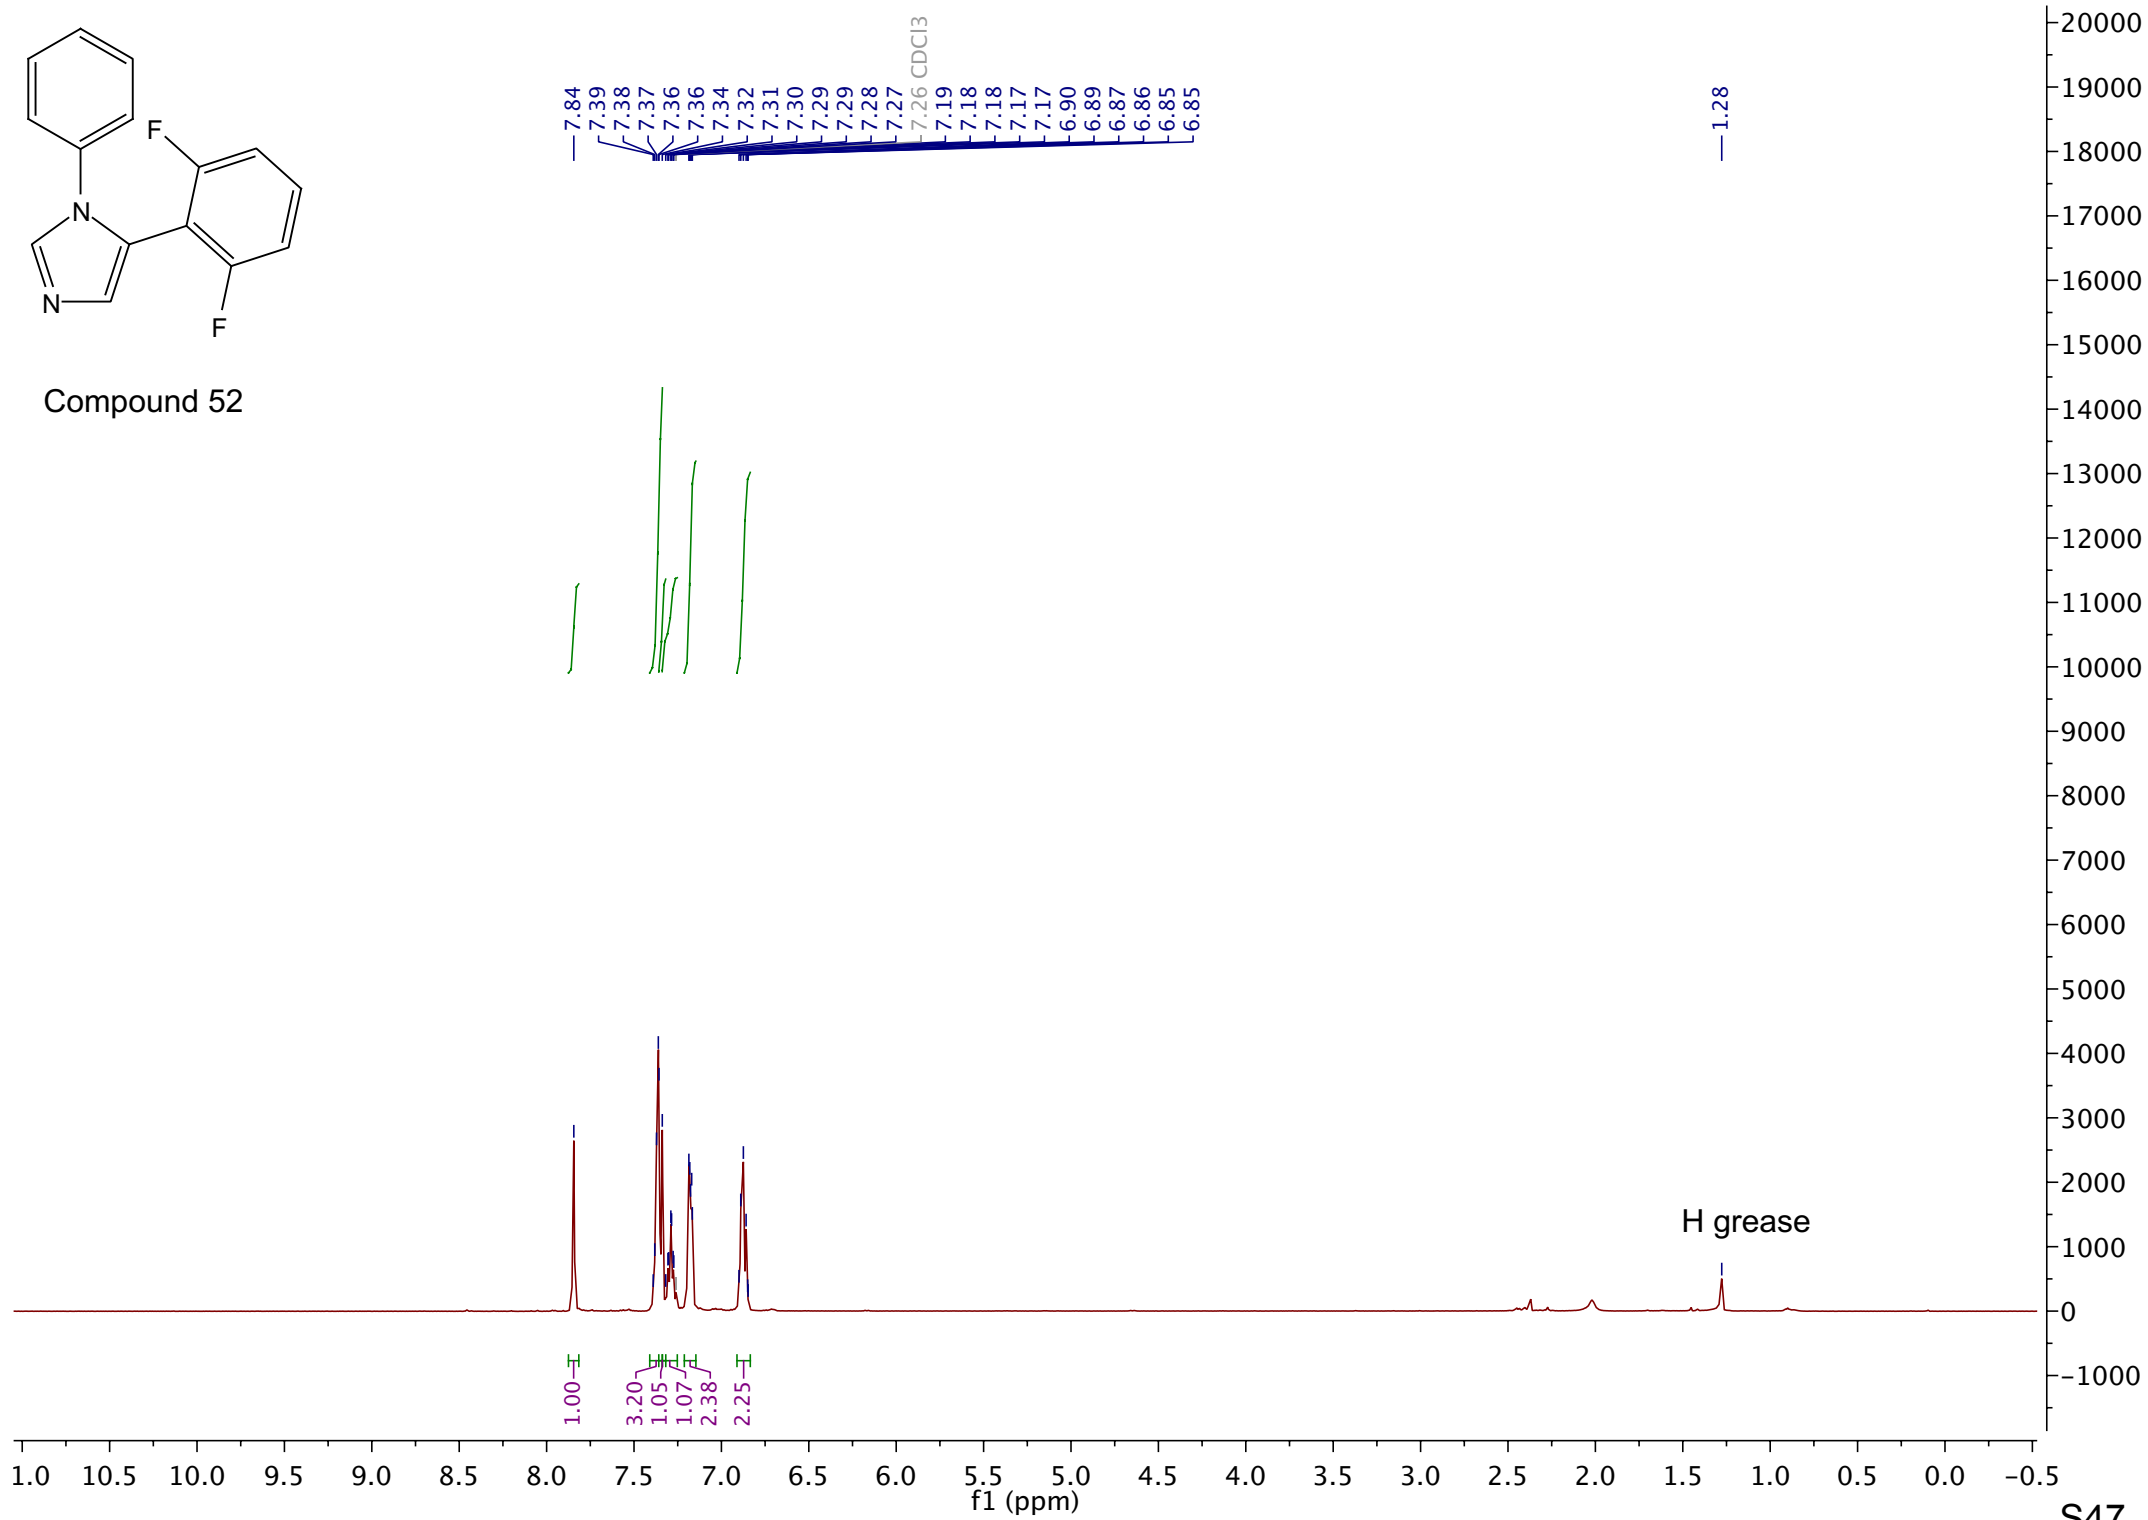

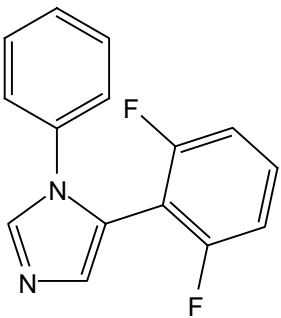

Compound 52

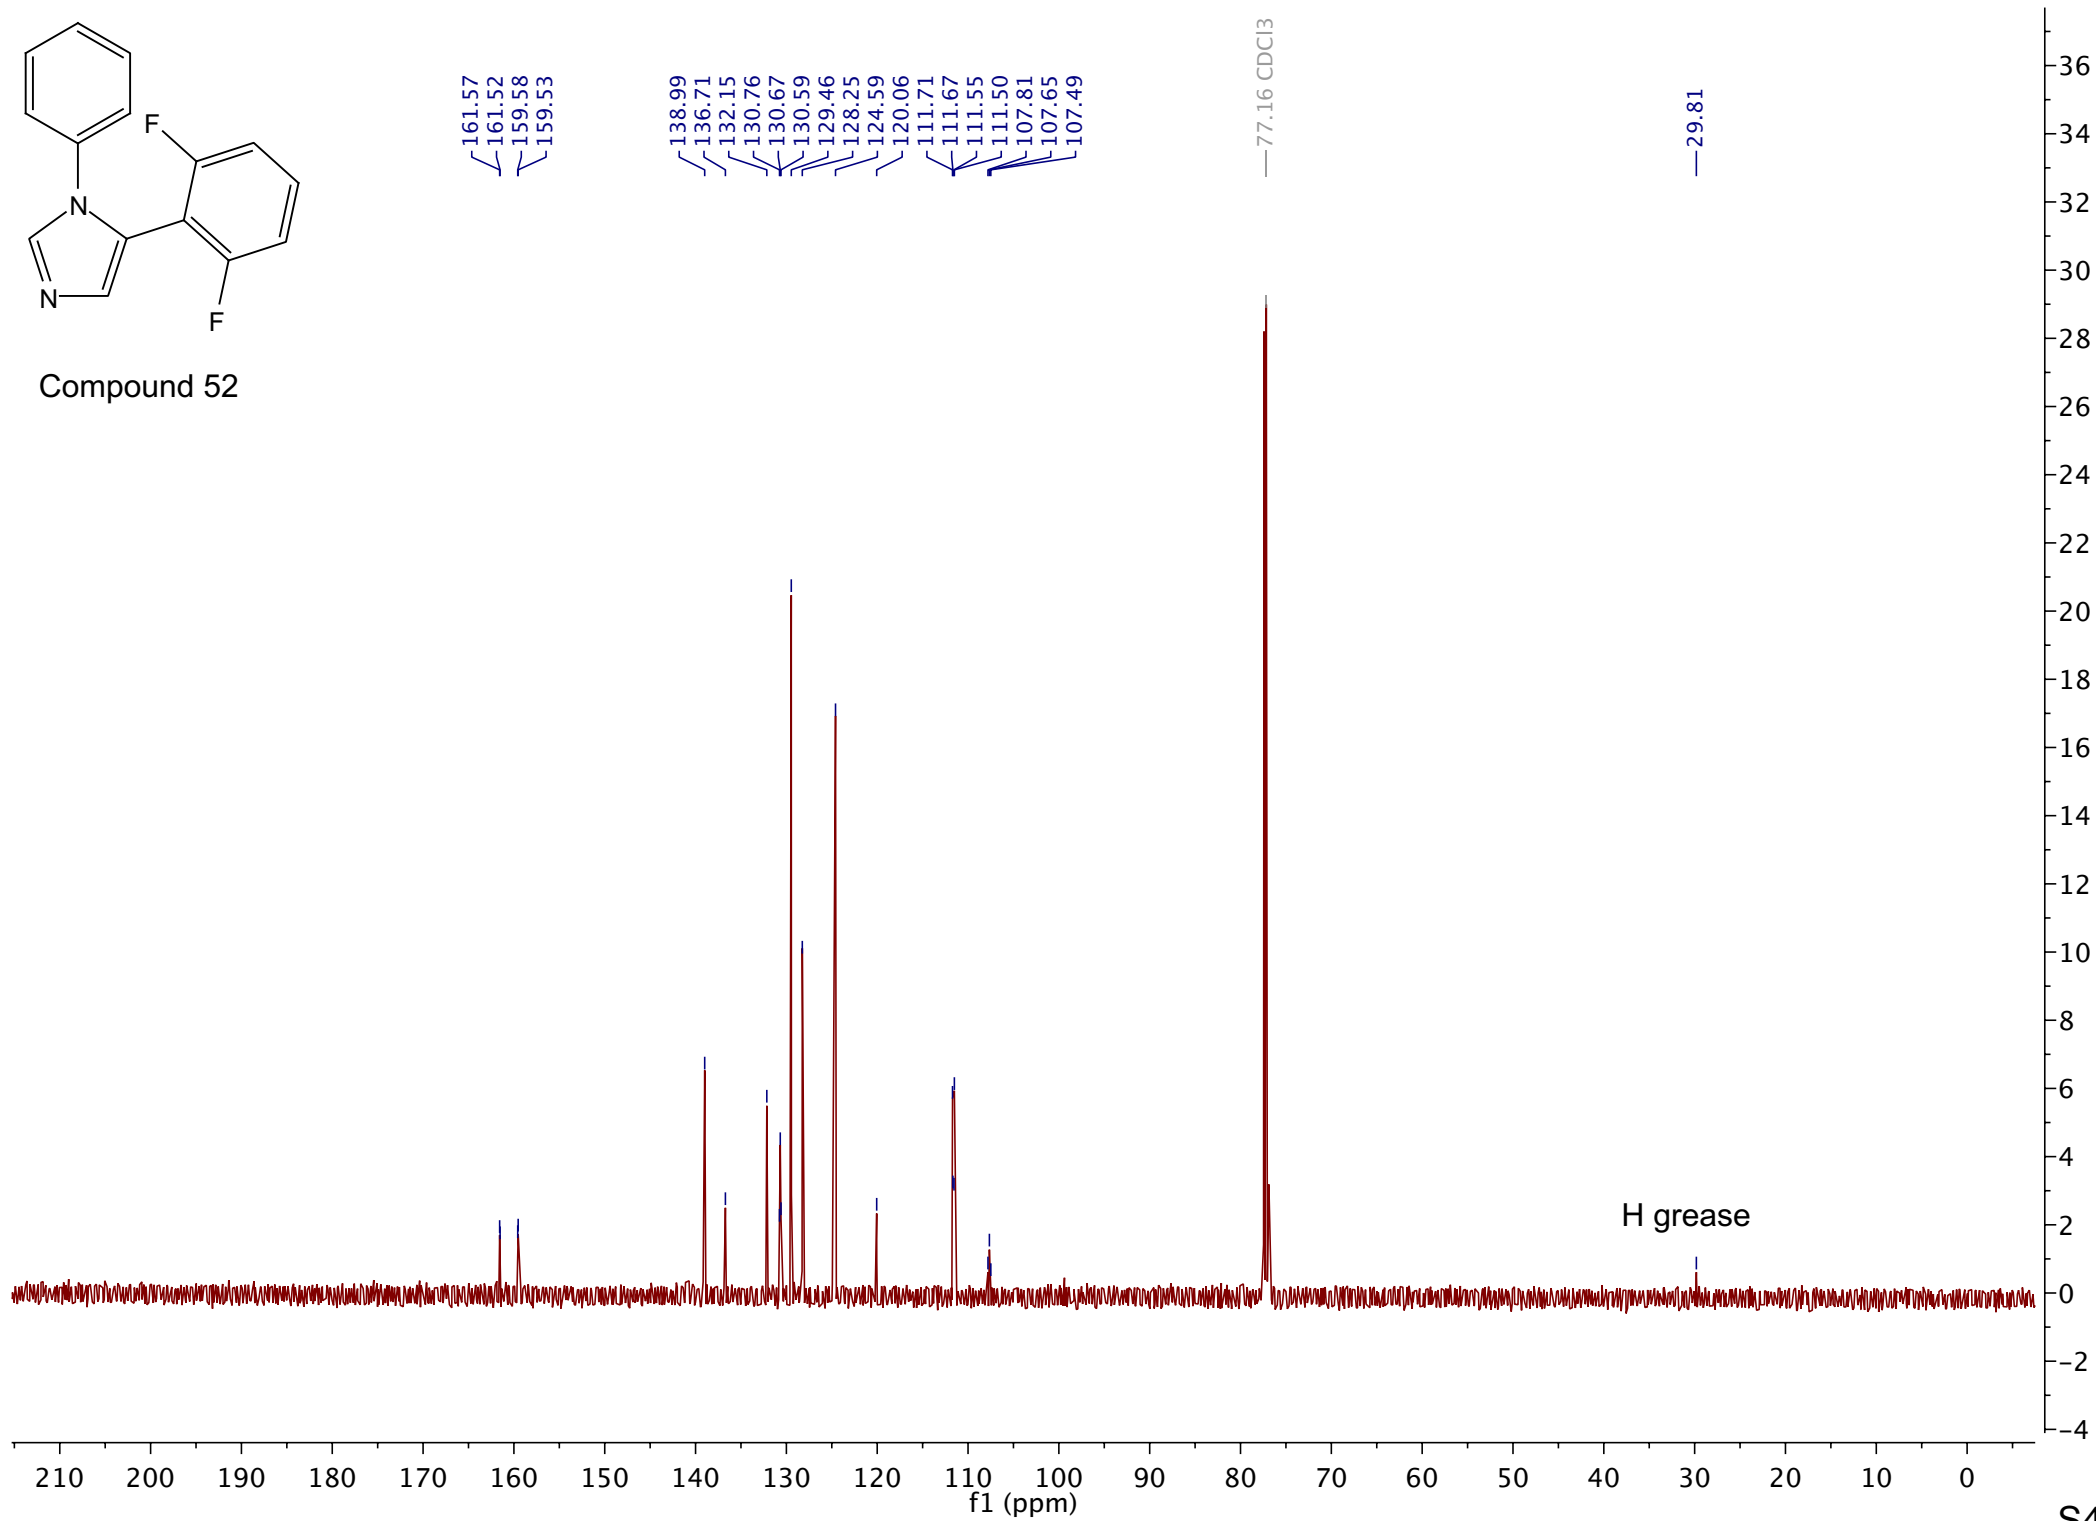



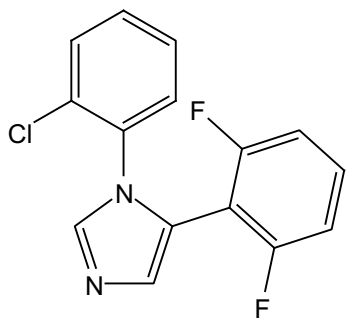

Compound 53

7.72  
7.40  
7.39  
7.38  
7.30  
7.29  
7.27  
7.27  
7.26 CDCl3  
7.26  
7.23  
7.22  
7.21  
7.19  
7.18  
7.16  
6.80  
6.80  
6.78  
6.78  
6.77  
6.76

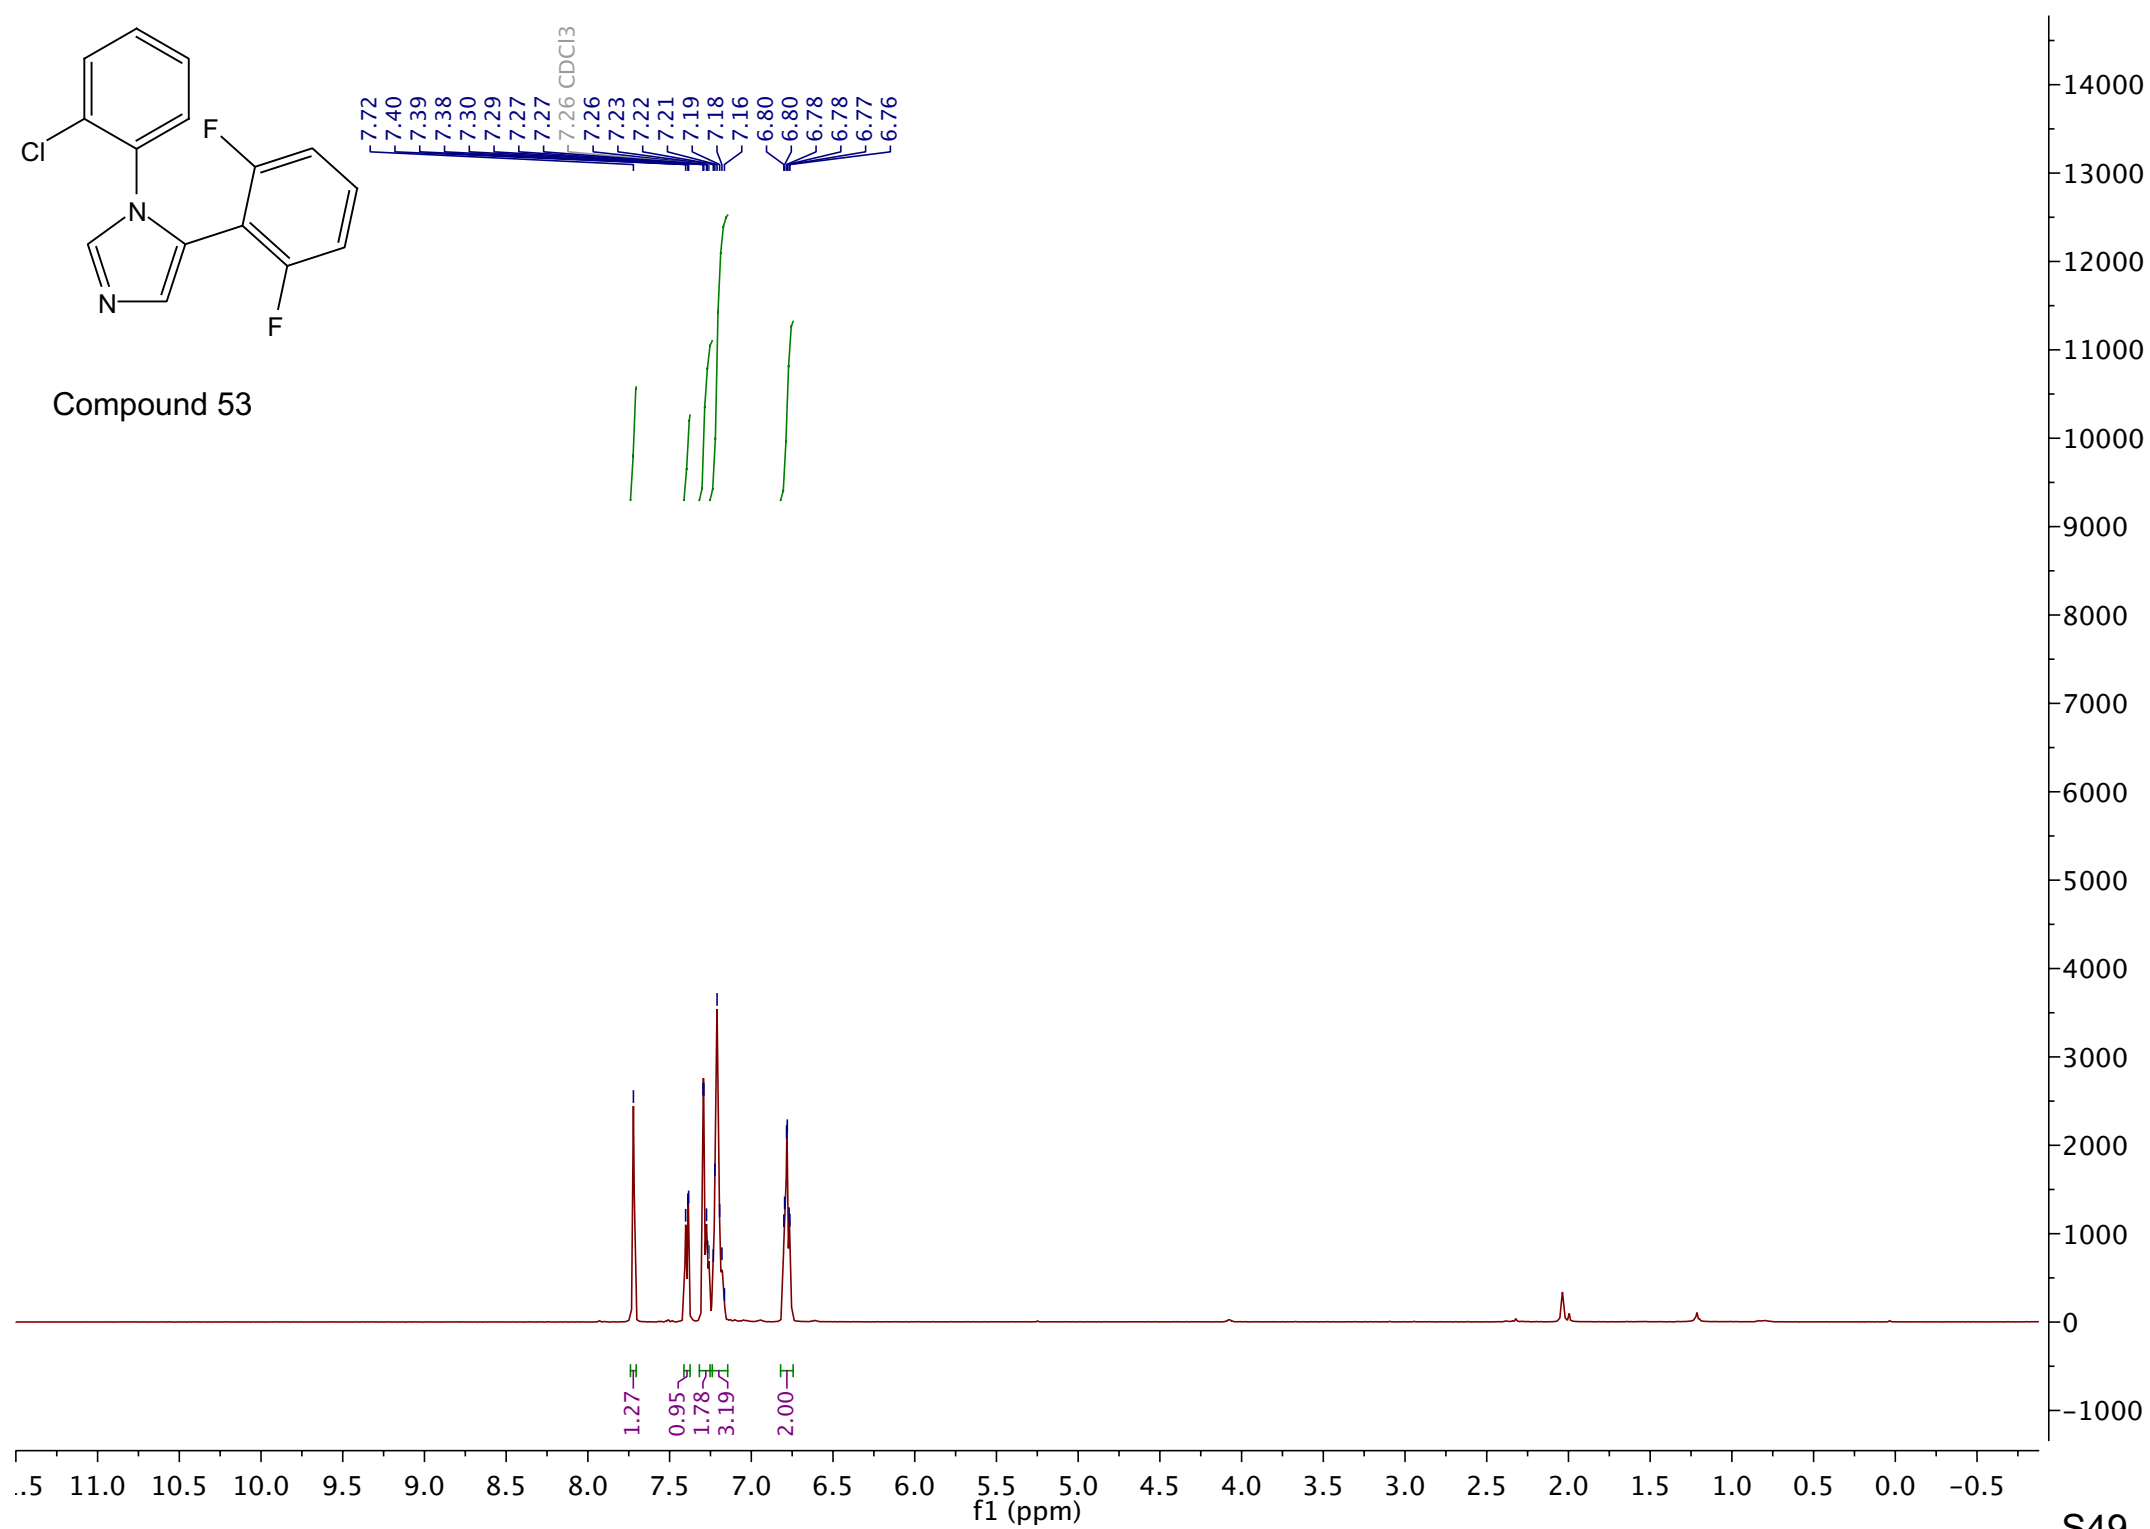

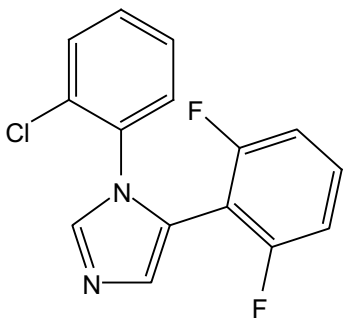

Compound 53

161.51  
161.46  
159.52  
159.47  
139.55  
134.11  
131.55  
131.53  
130.76  
130.68  
130.60  
130.54  
130.13  
129.00  
127.44  
121.01  
111.63  
111.59  
111.46  
111.42  
107.47  
107.31  
107.16

77.16 CDCl3

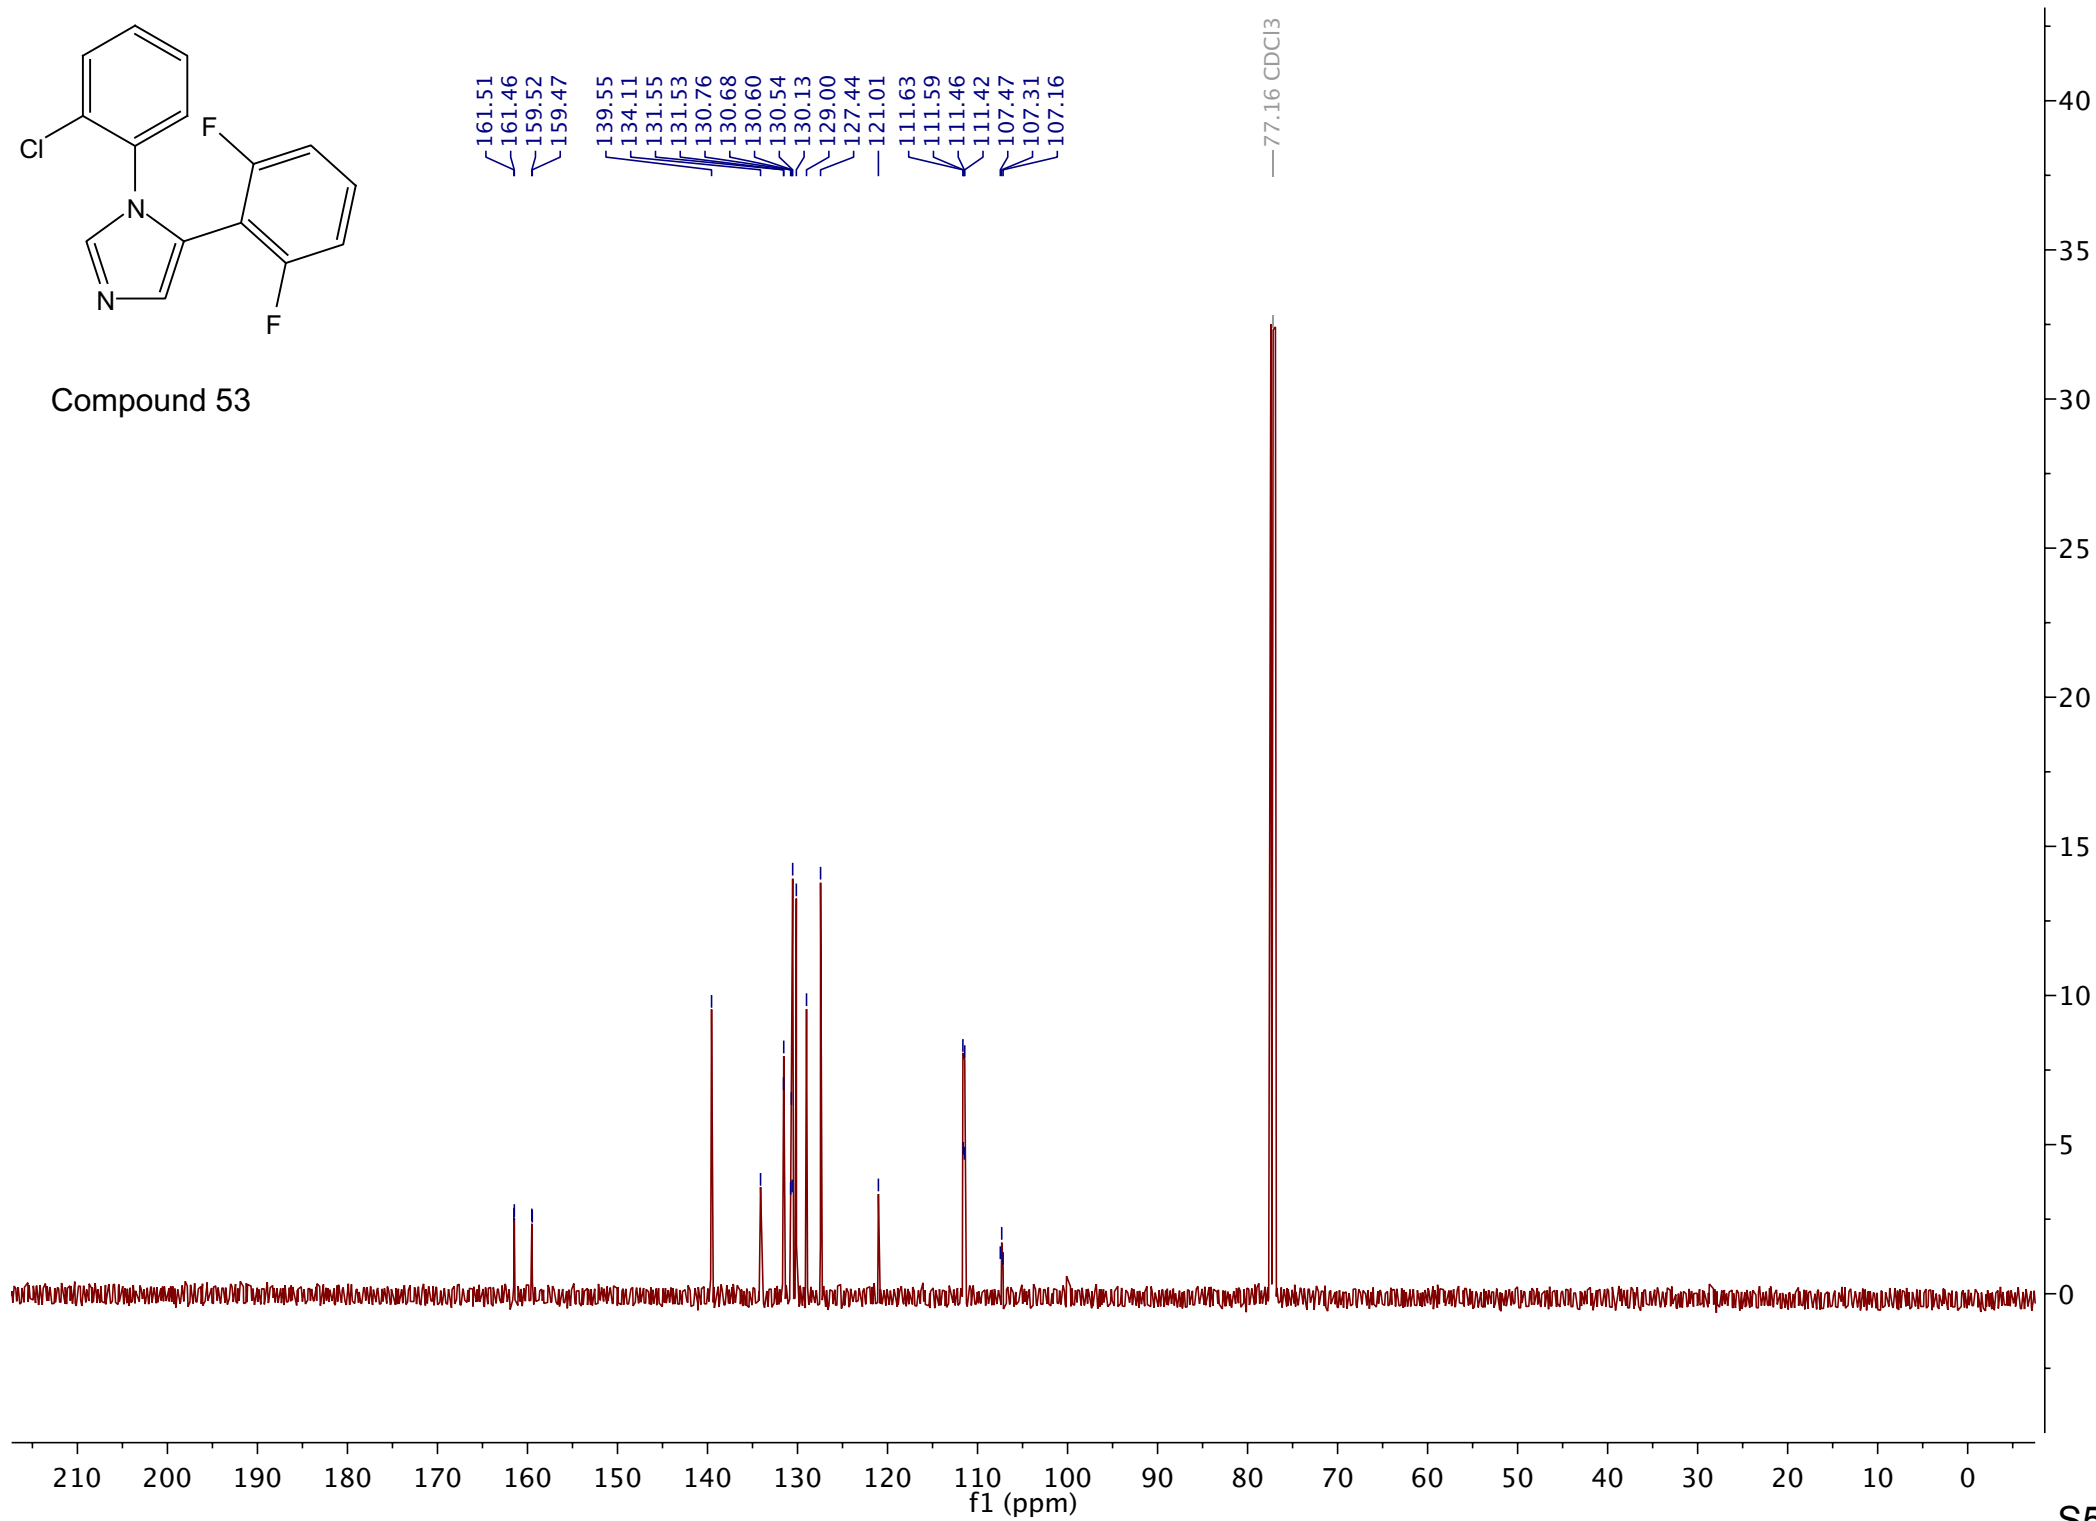

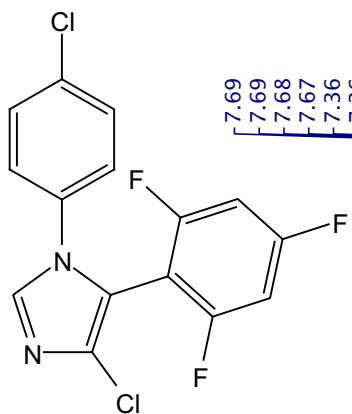

Compound 54

7.69  
7.69  
7.68  
7.67  
7.36  
7.35  
7.35  
7.34  
7.34  
7.33  
7.33  
7.32  
7.26 CDCl3  
7.10  
7.09  
7.09  
7.08  
7.08  
7.07  
7.06  
6.71  
6.70  
6.70  
6.69  
6.68  
6.68  
6.67  
6.66  
6.66  
6.65  
6.64  
6.64

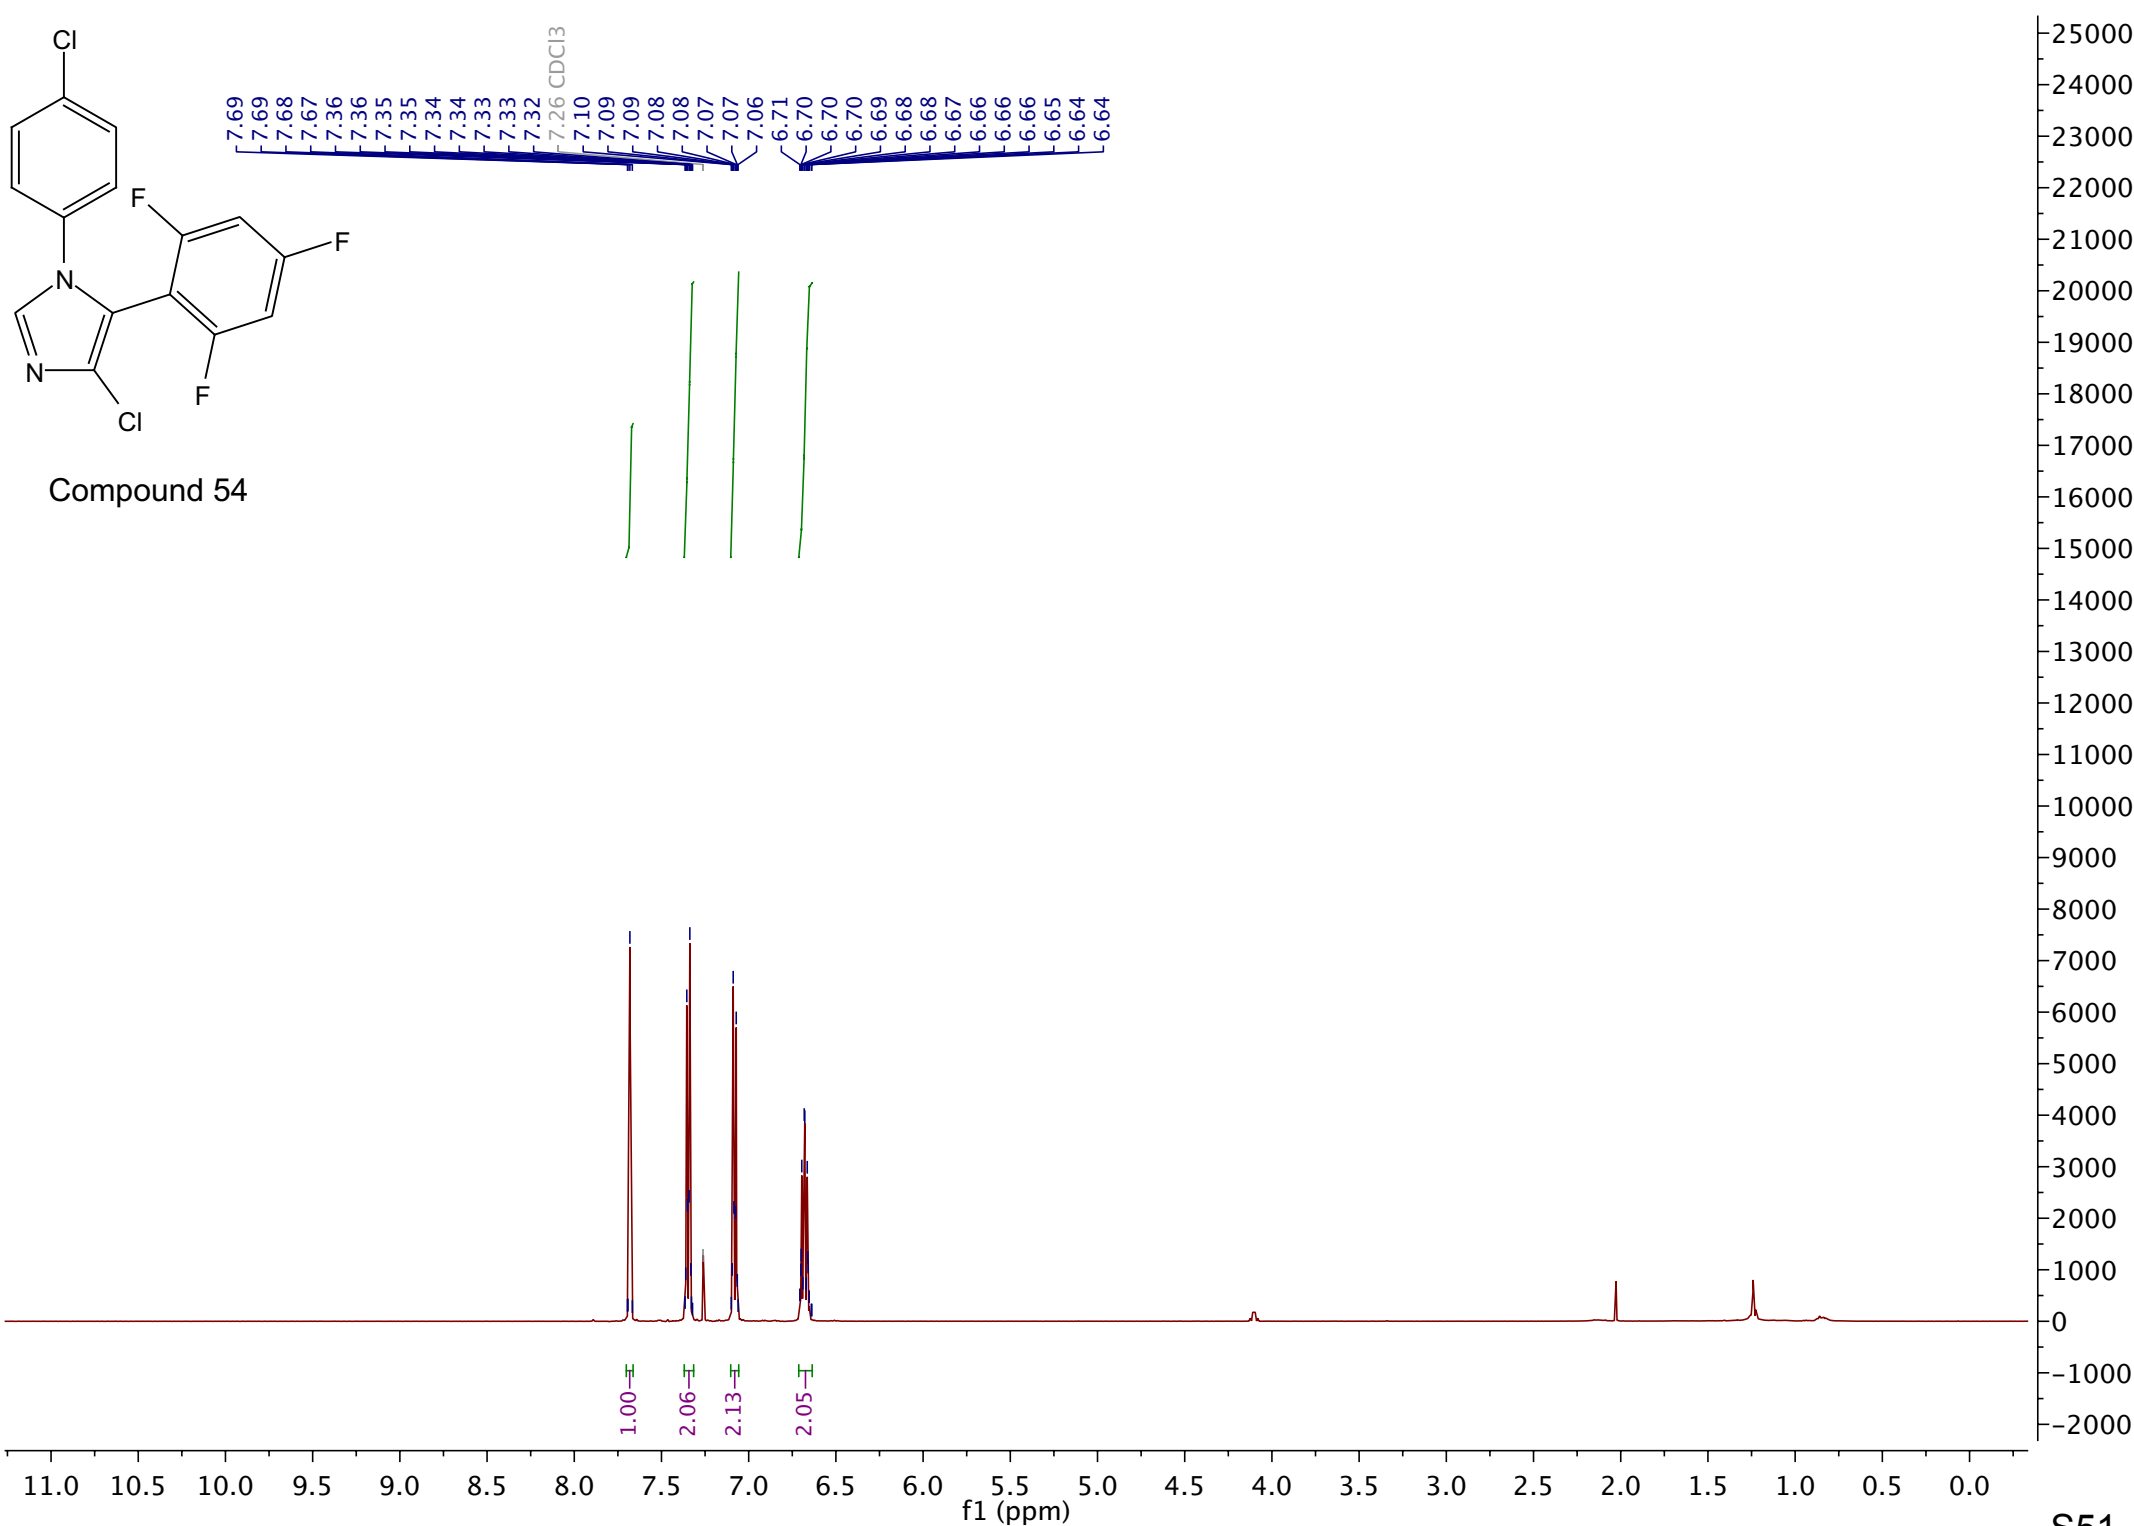

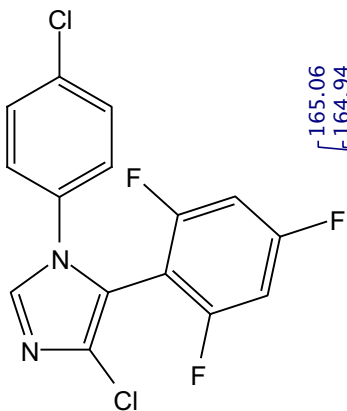

Compound 54

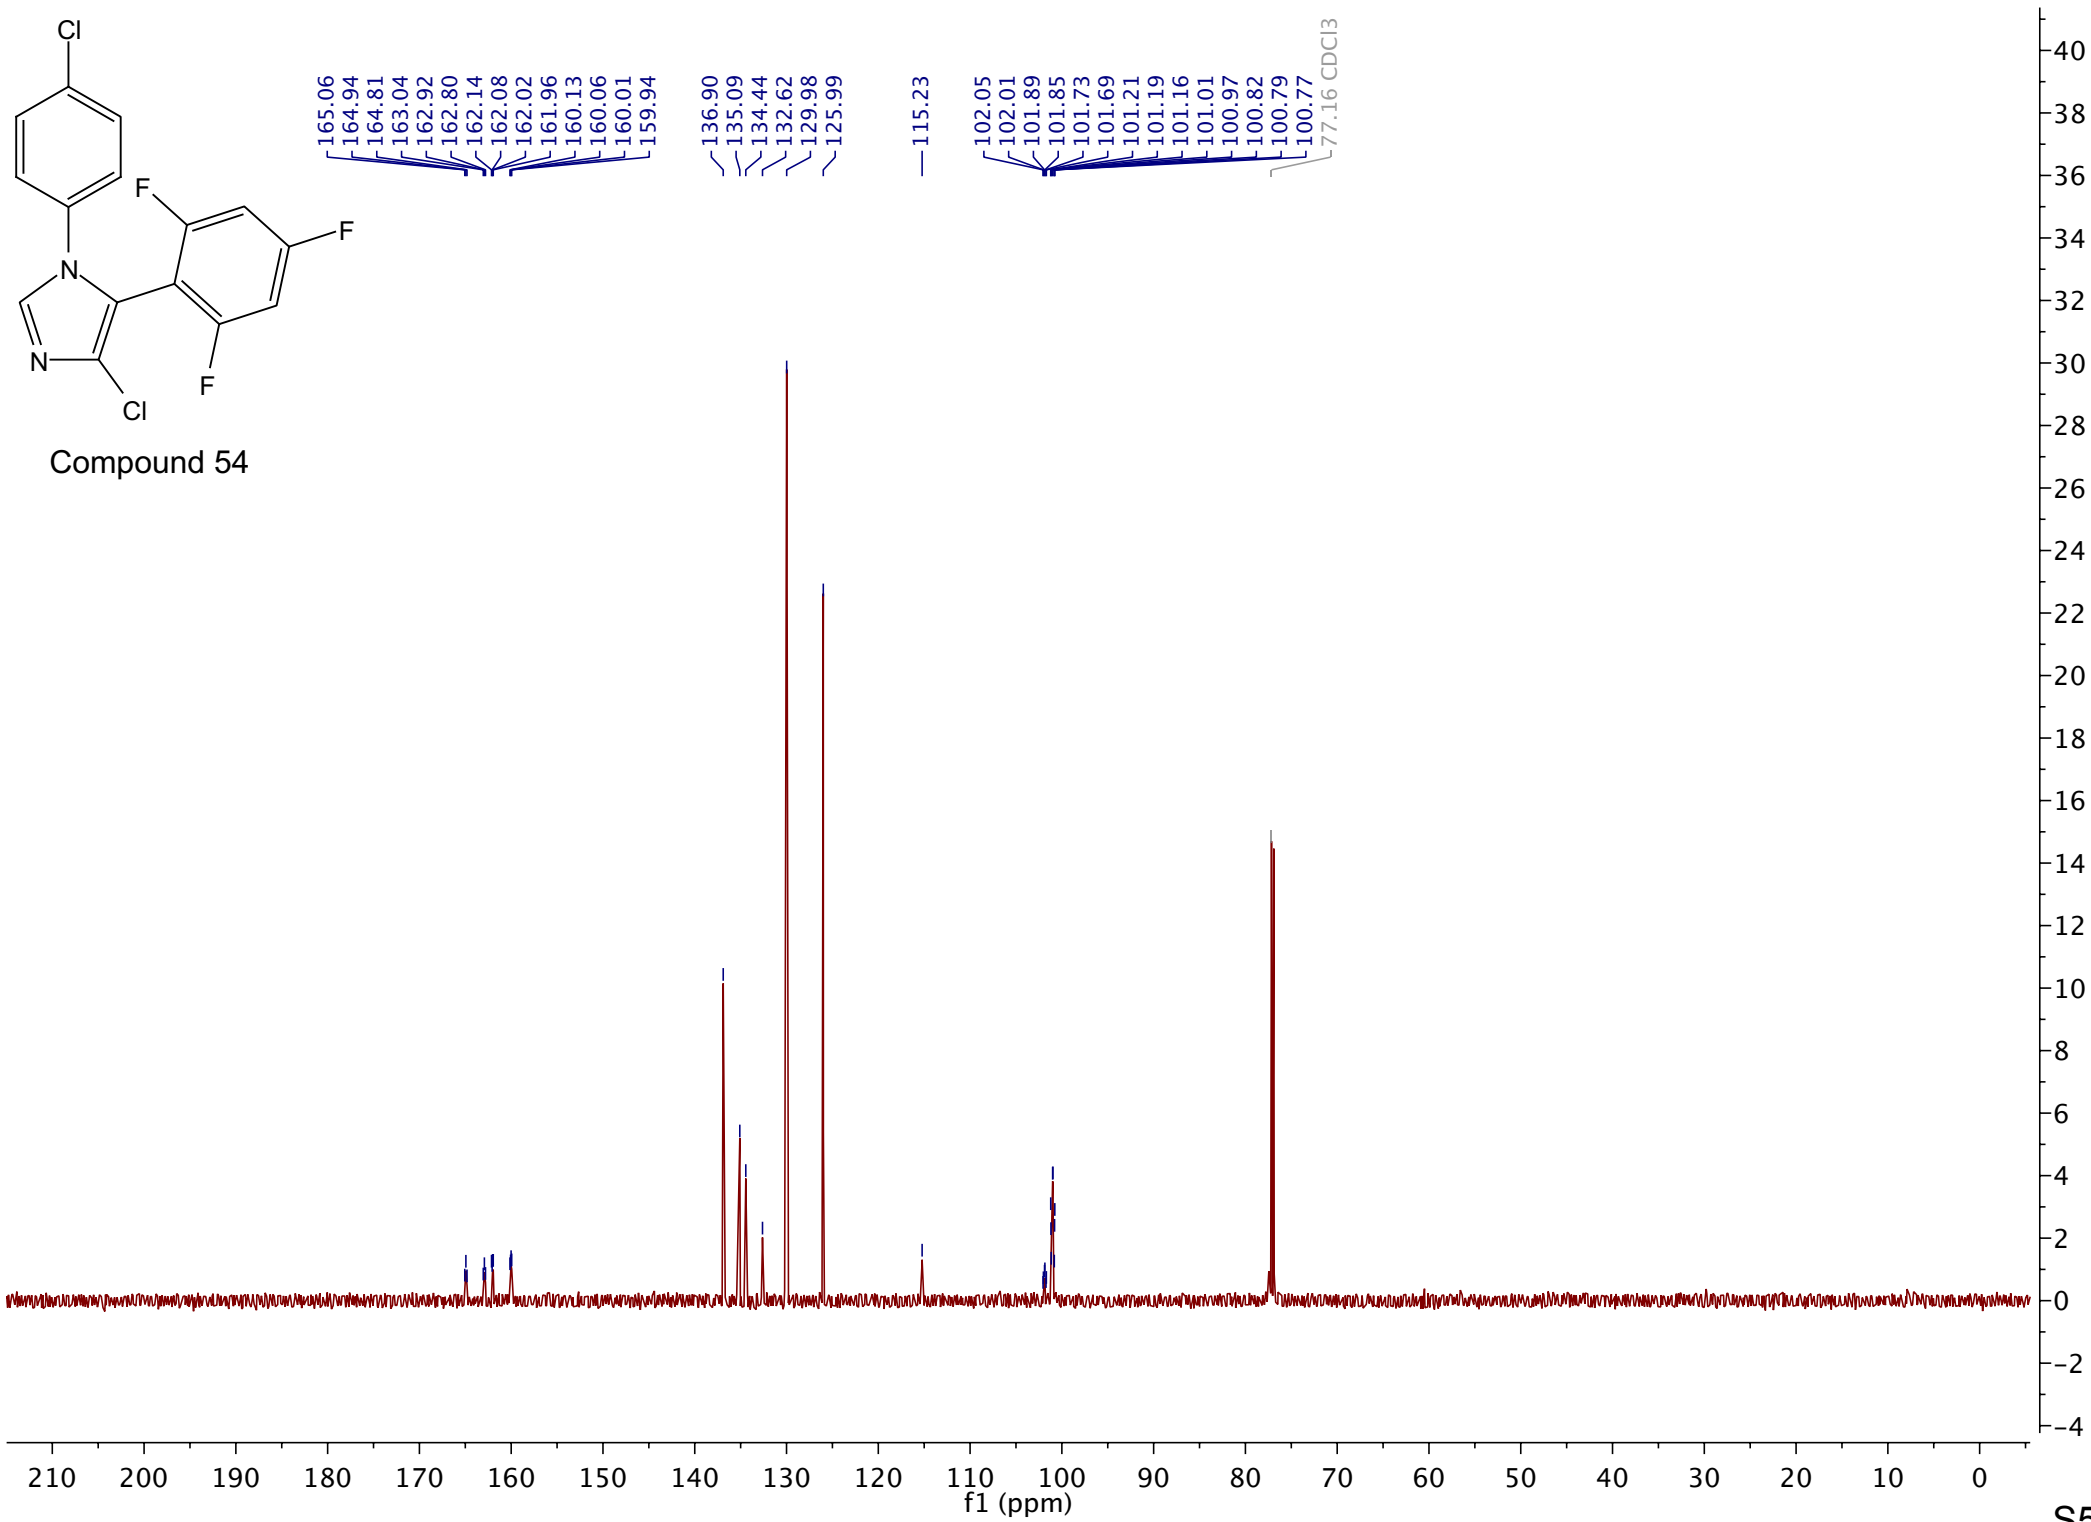

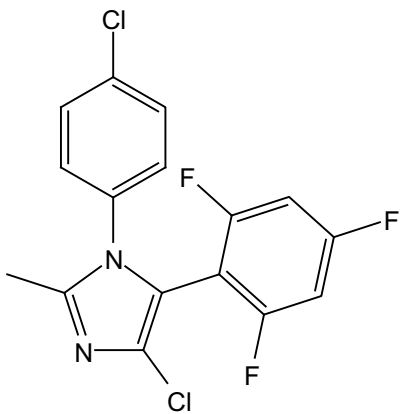

Compound 55

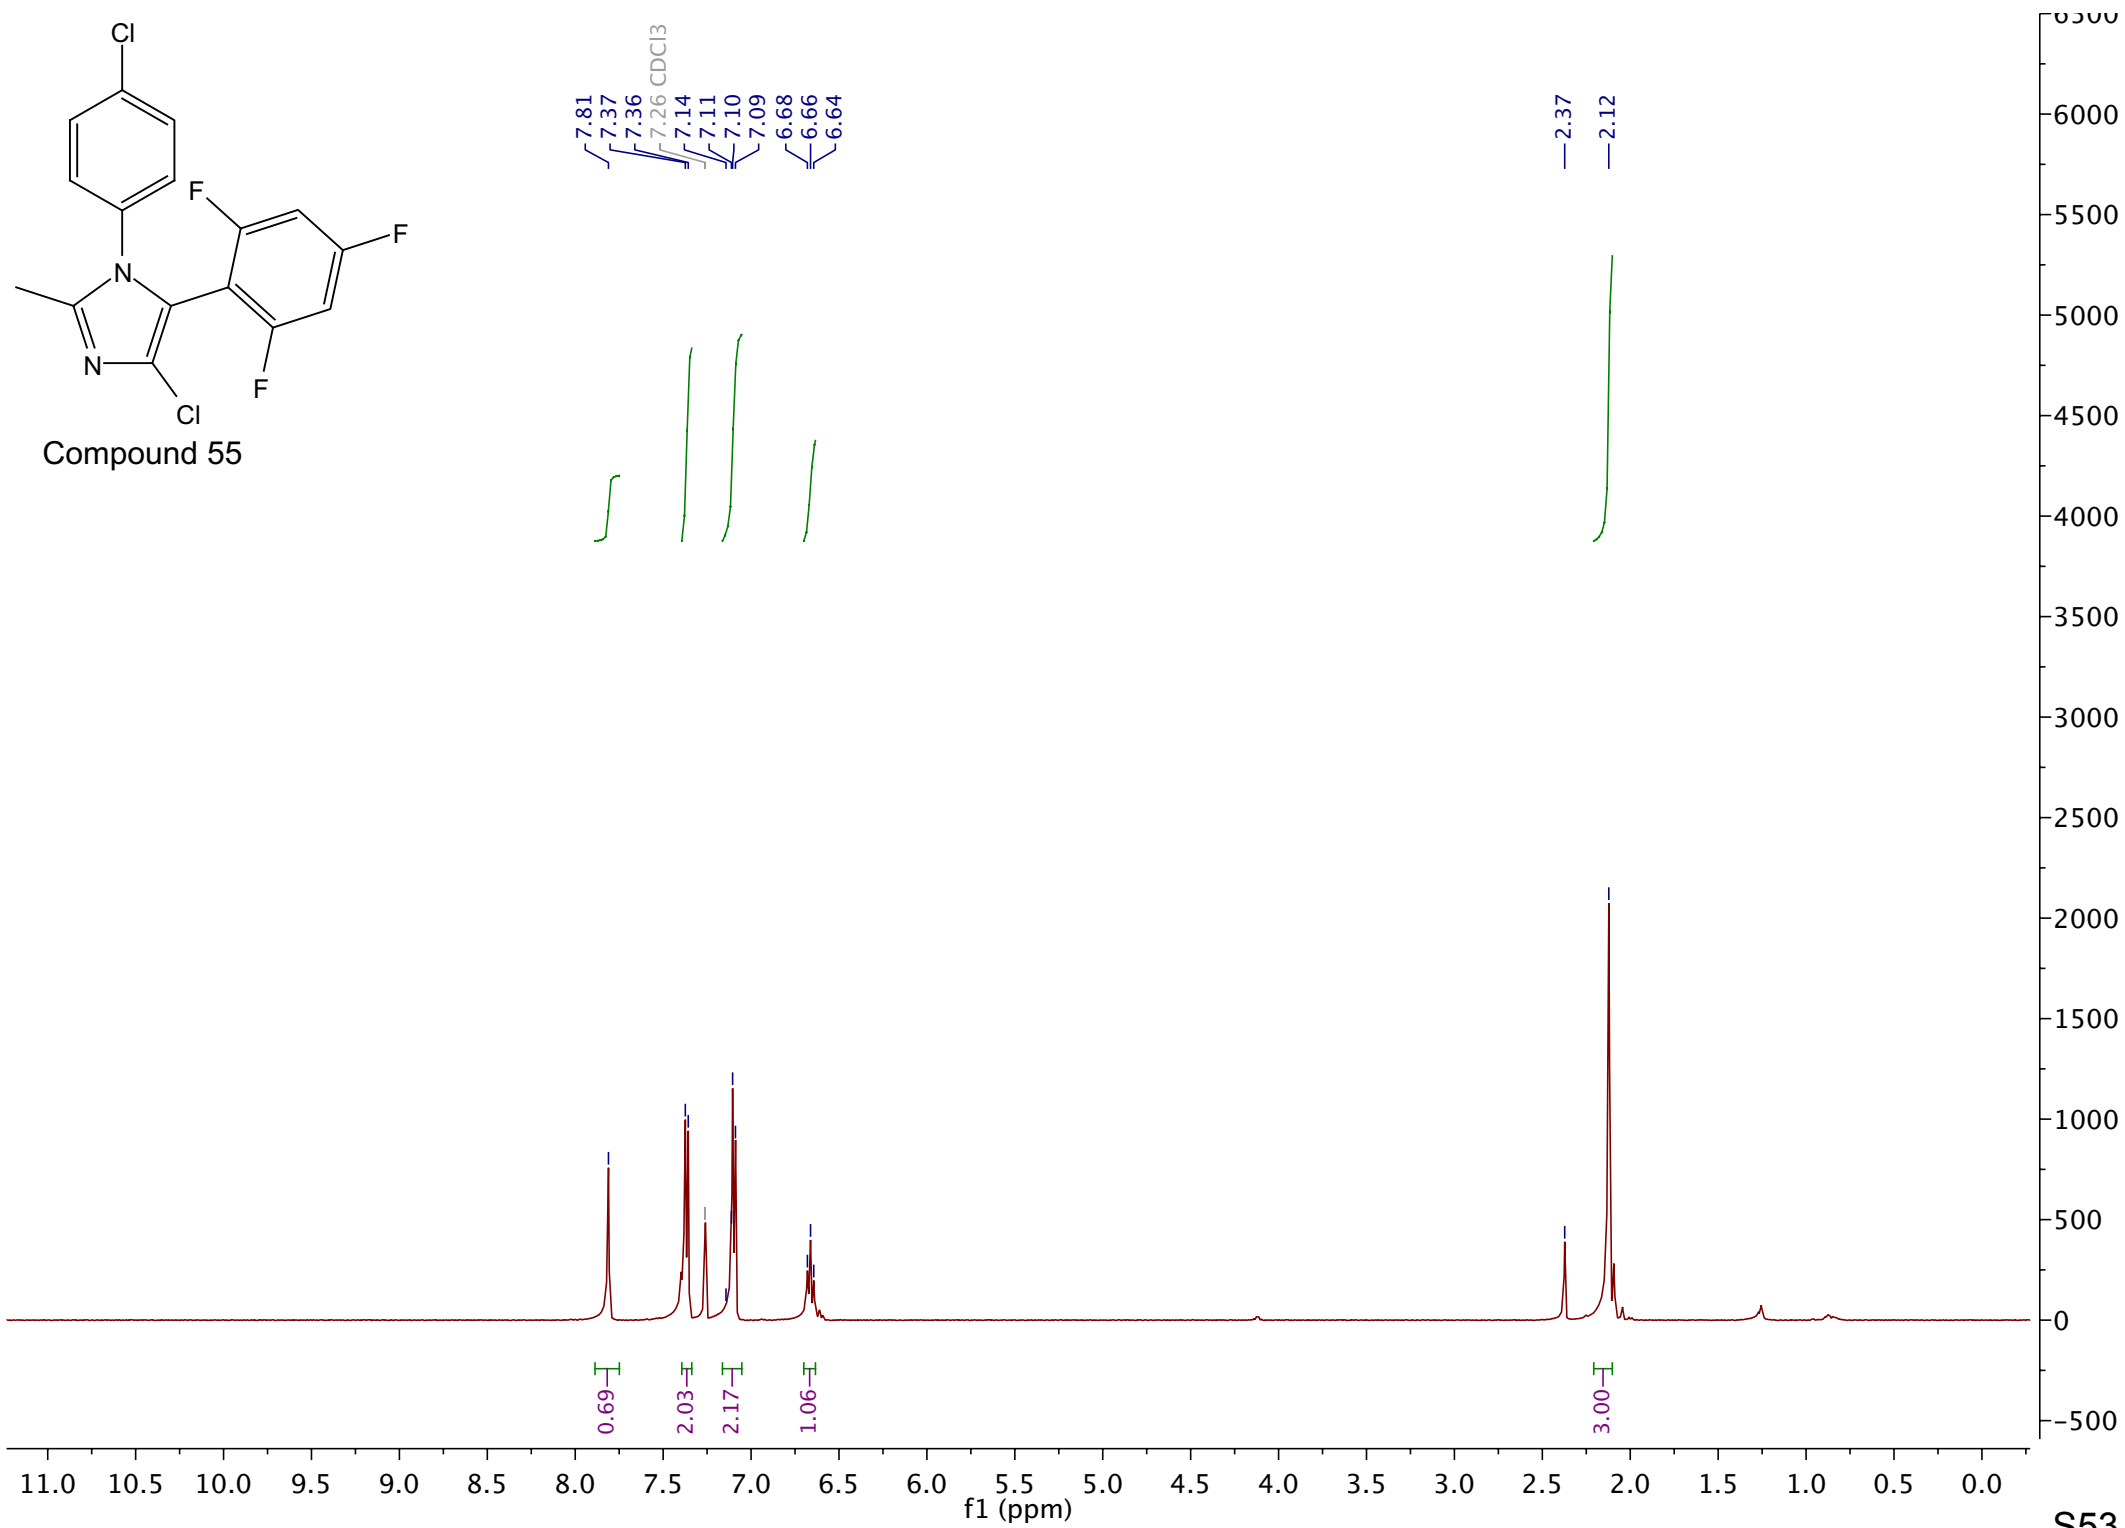

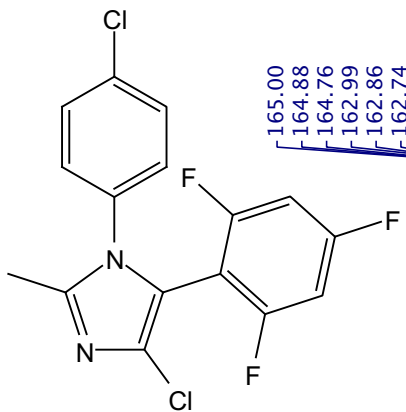

Compound 55

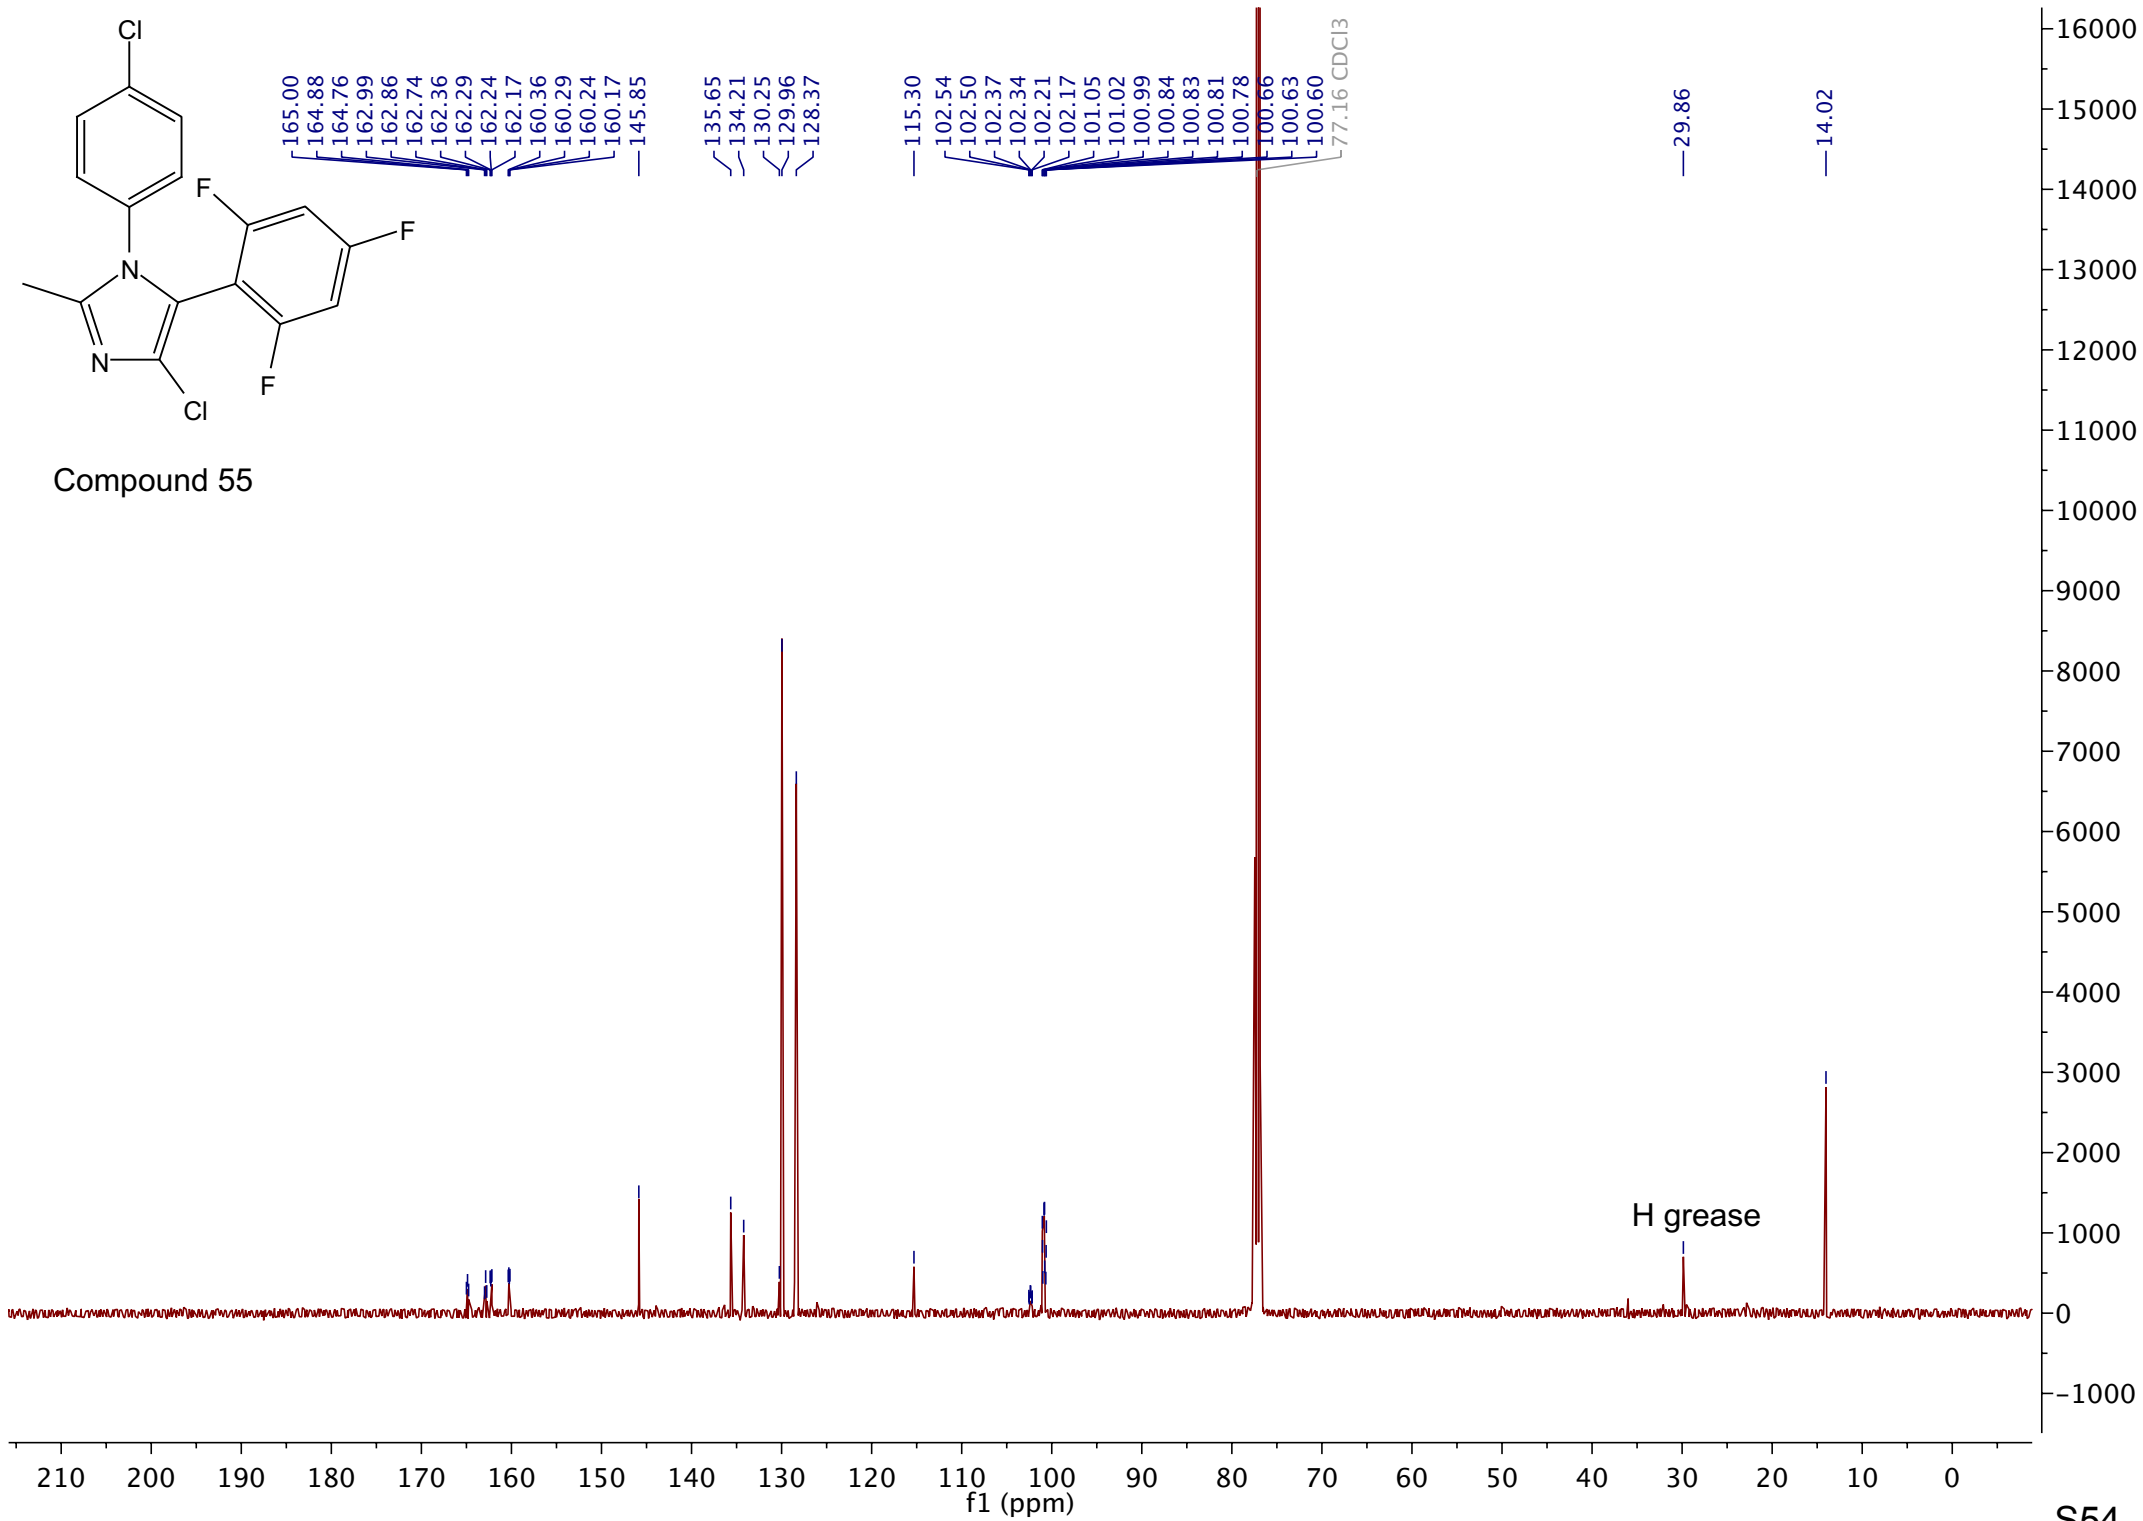

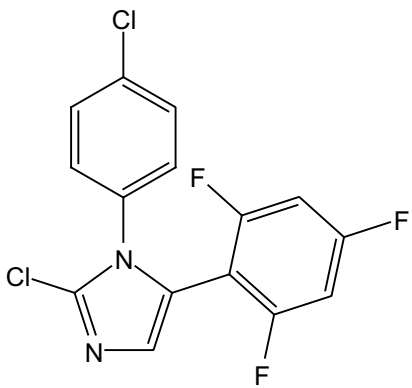

Compound 56

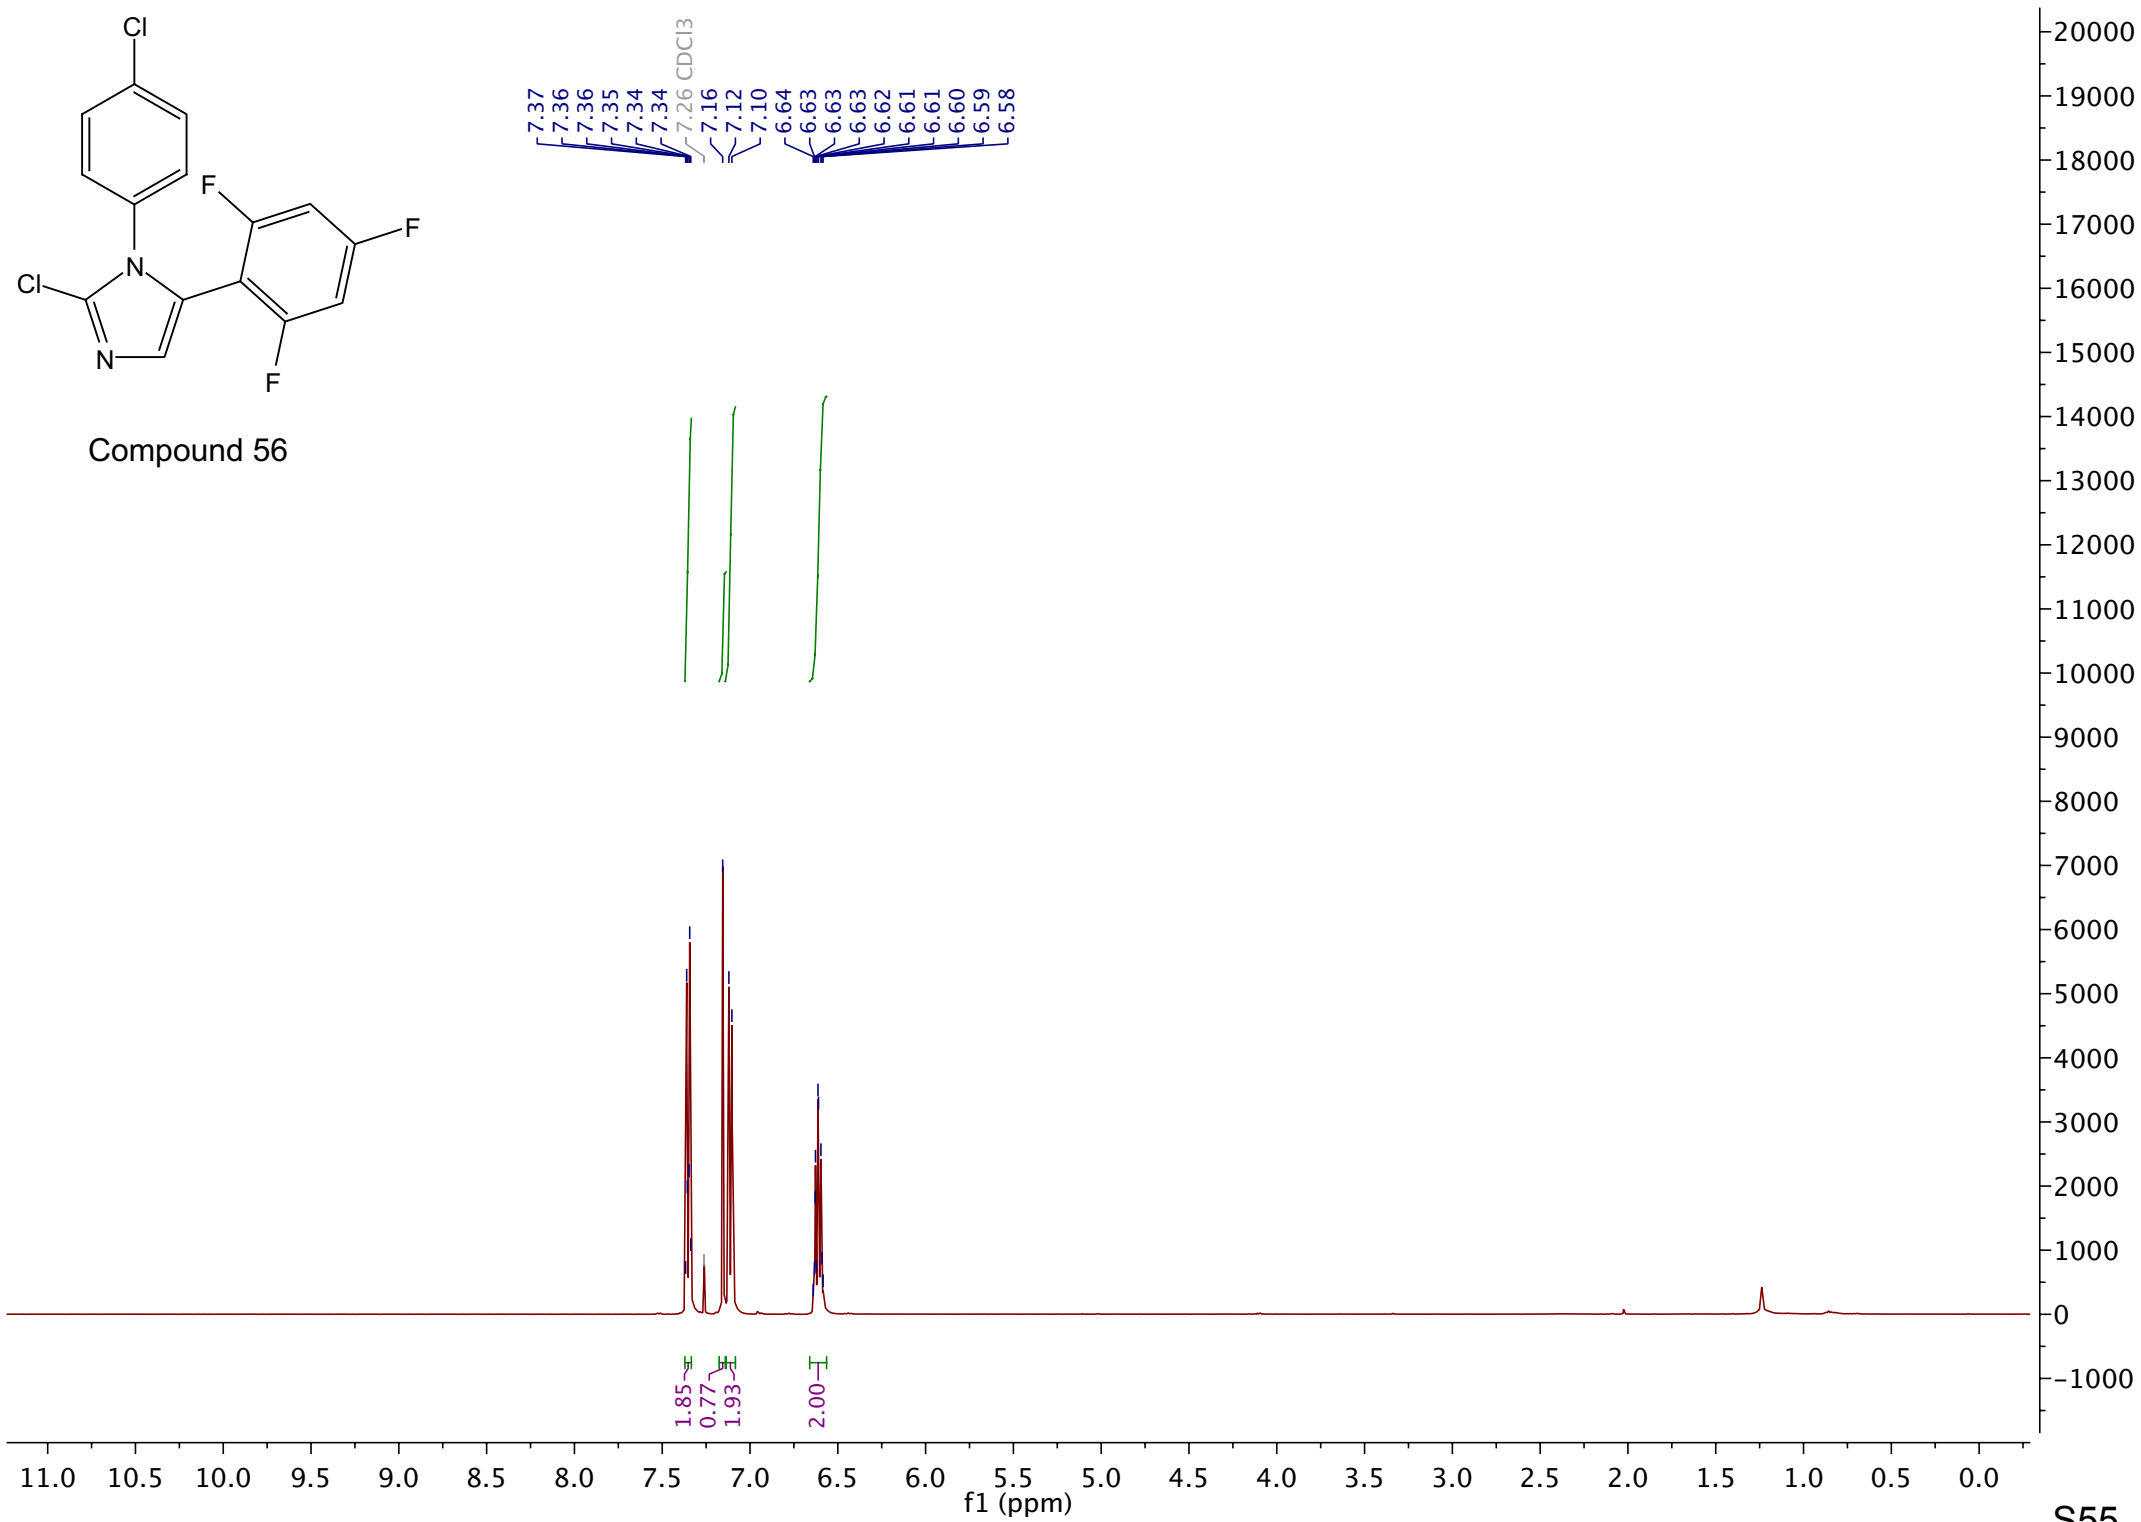

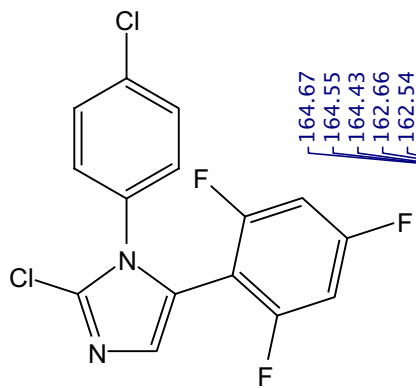

Compound 56

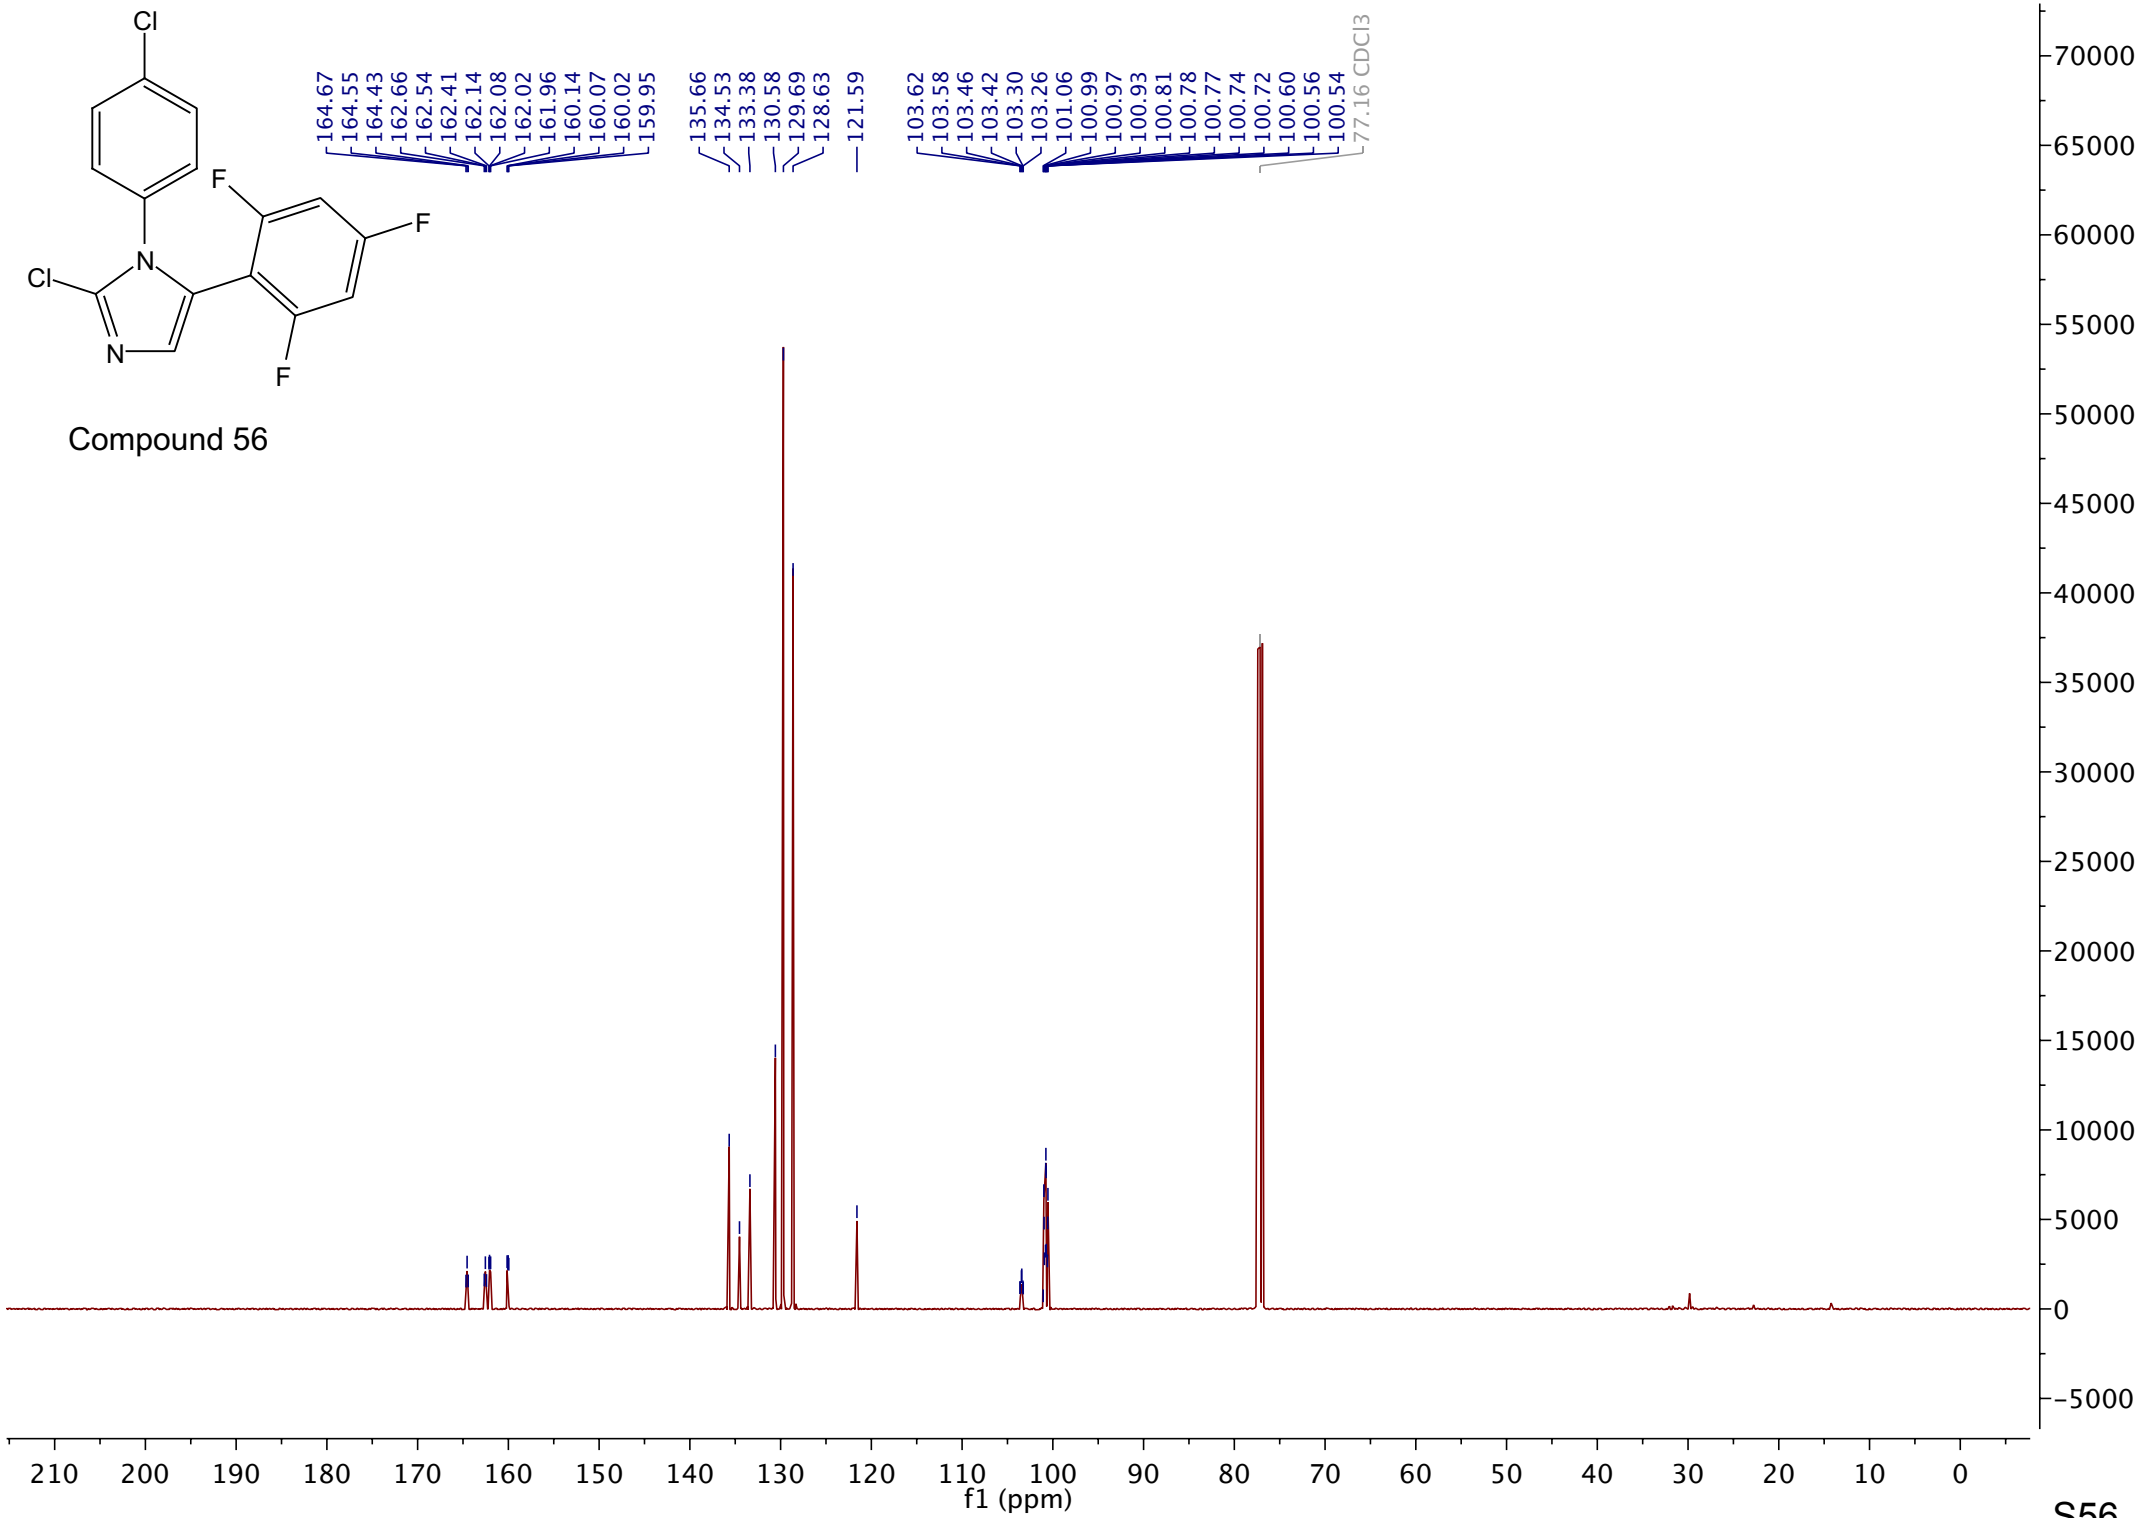



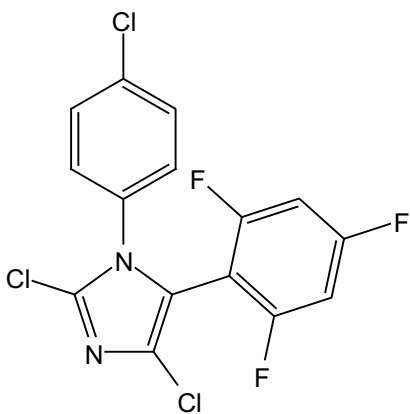

Compound 57

7.39  
7.39  
7.39  
7.38  
7.38  
7.37  
7.37  
7.37  
7.37  
7.36  
7.36  
7.26 CDCl3  
7.13  
7.11  
6.69  
6.68  
6.68  
6.67  
6.67  
6.66  
6.66  
6.66  
6.65  
6.64  
6.64  
6.63

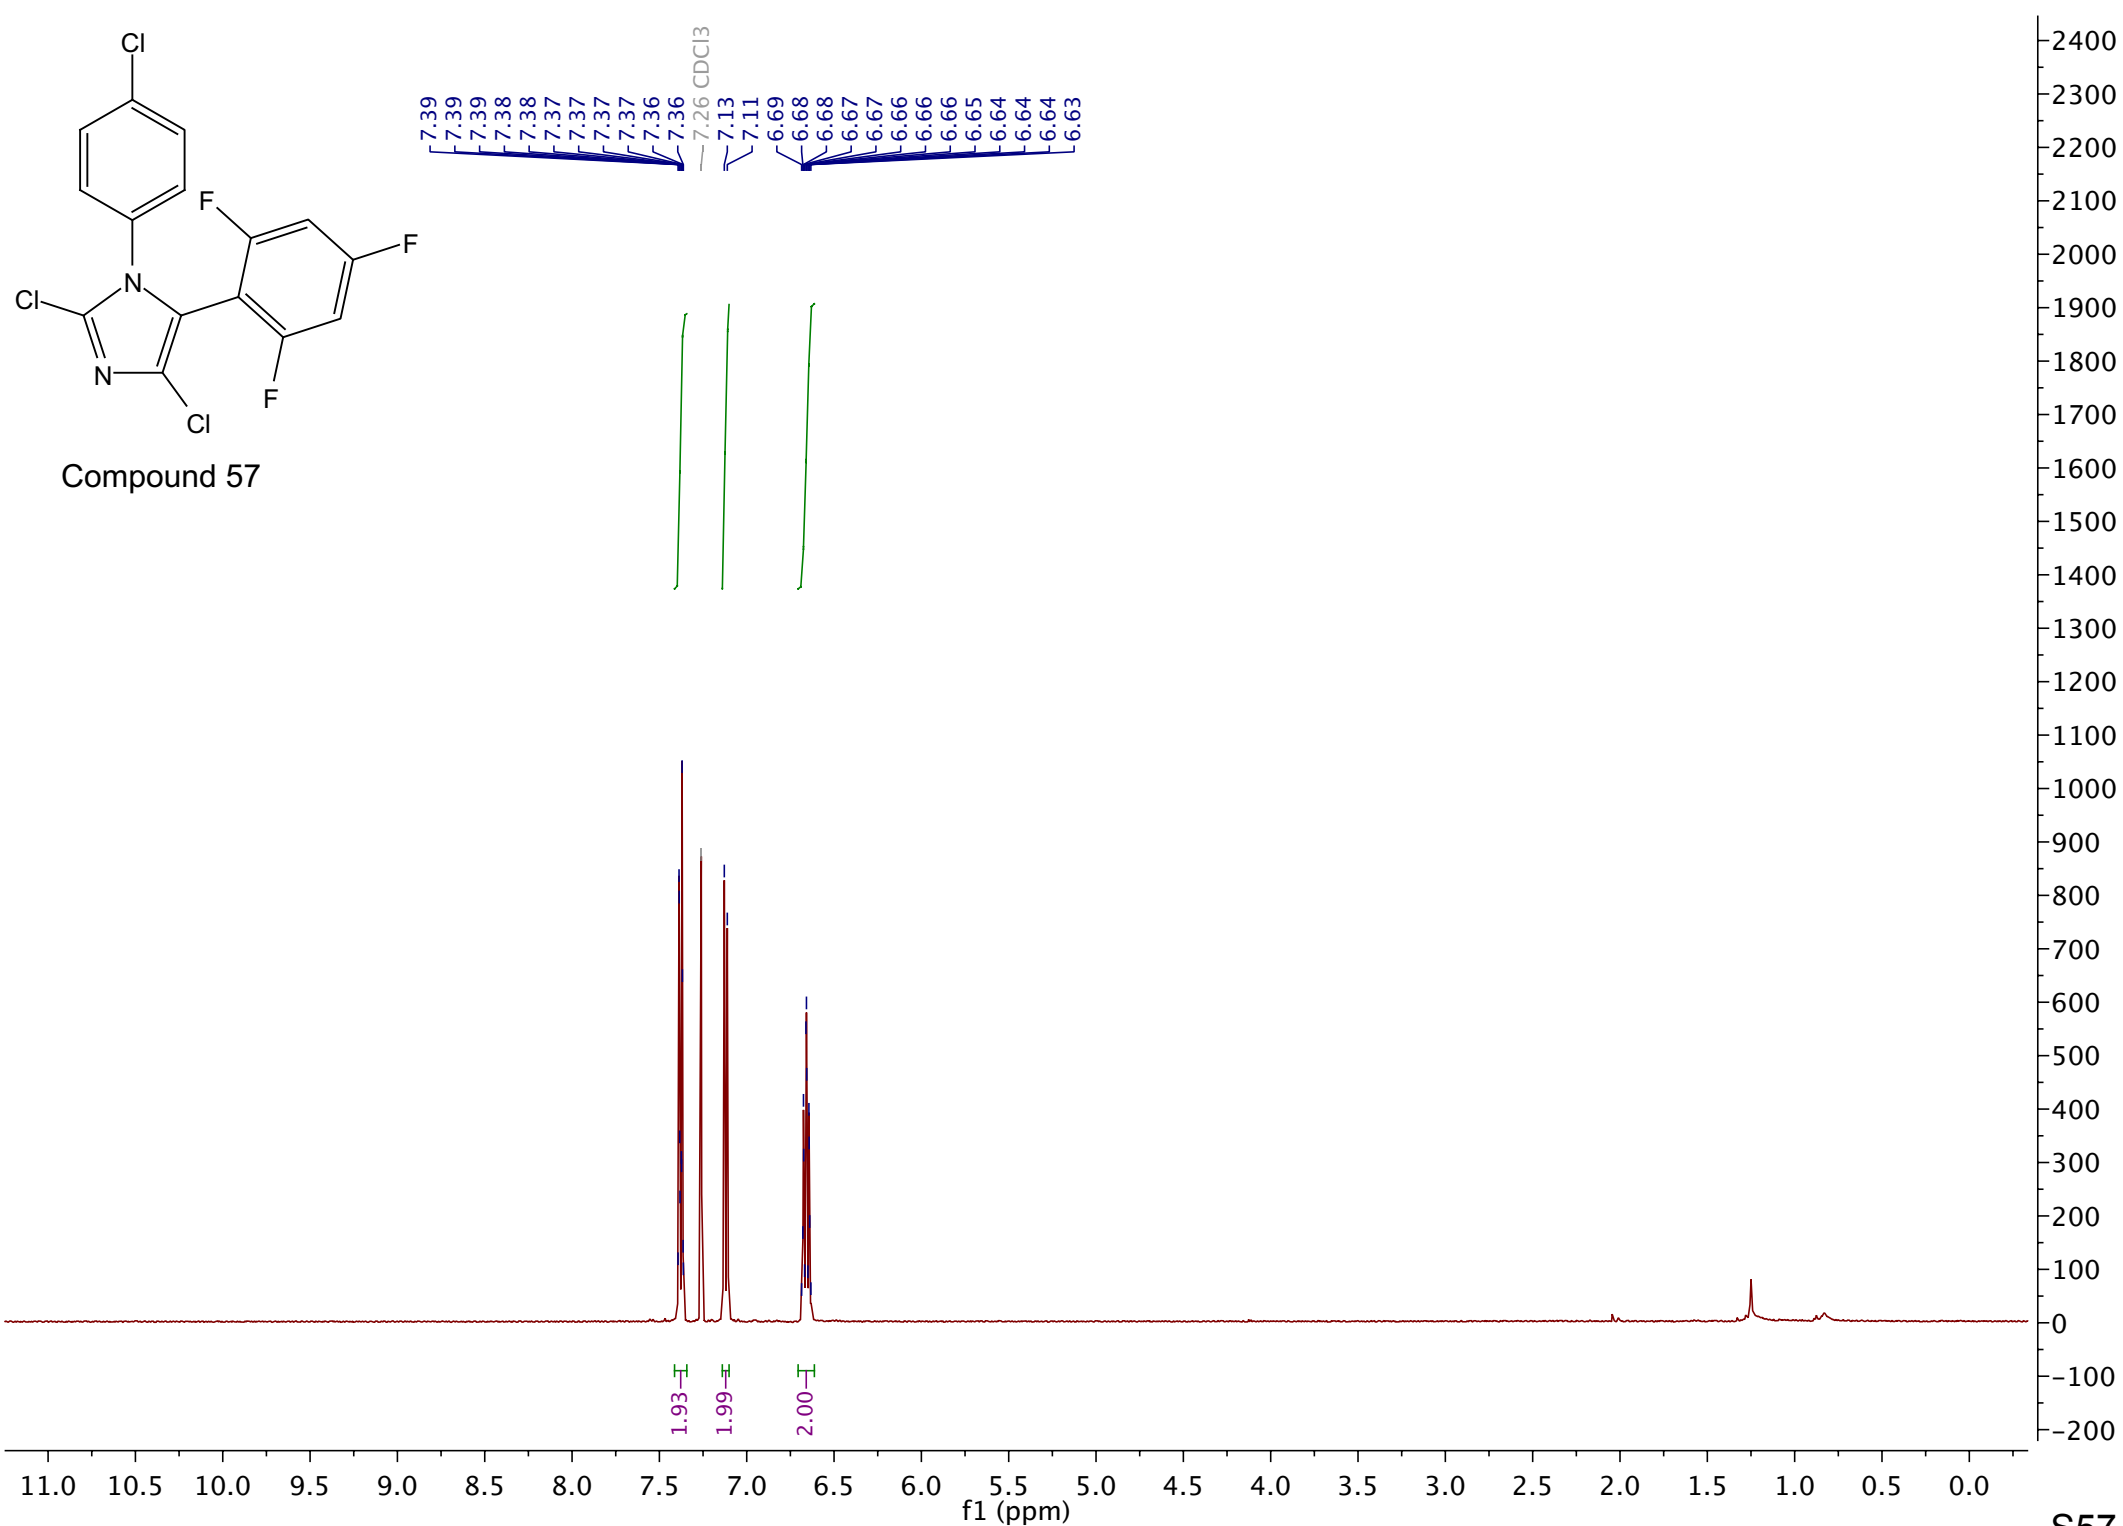

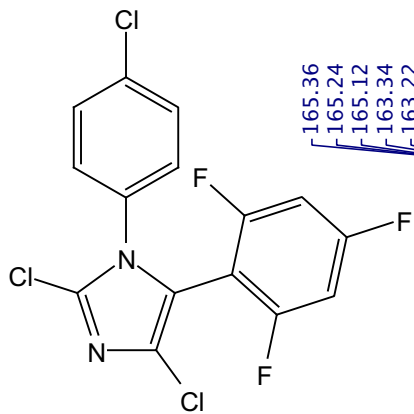

Compound 57

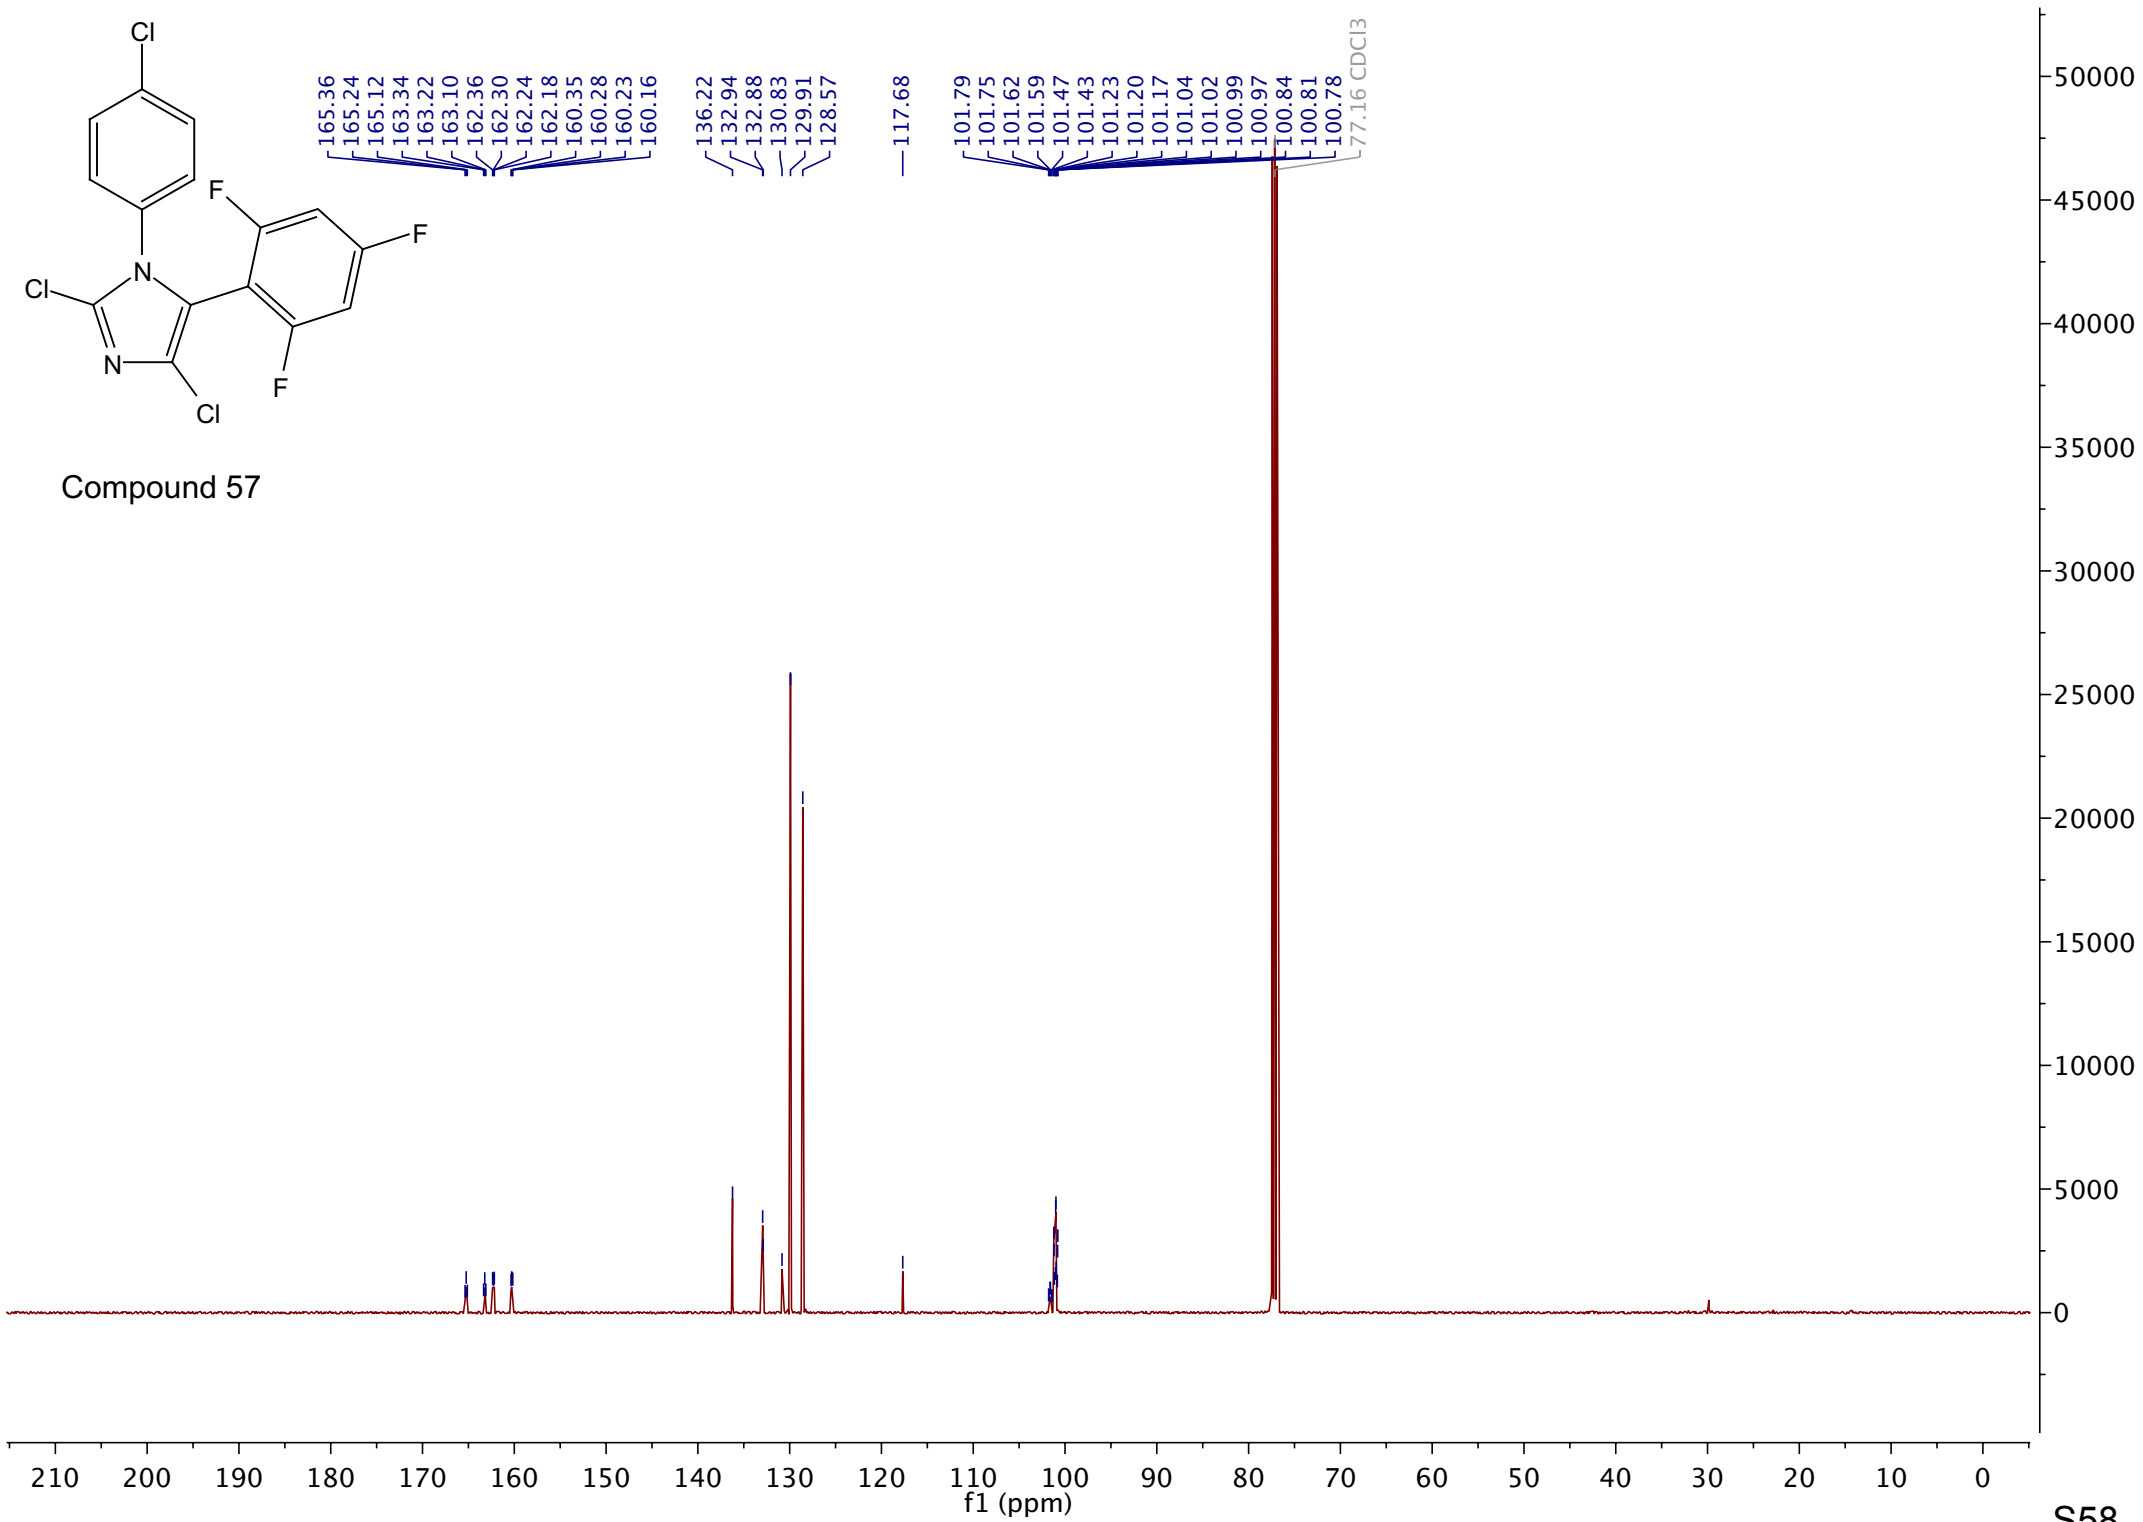

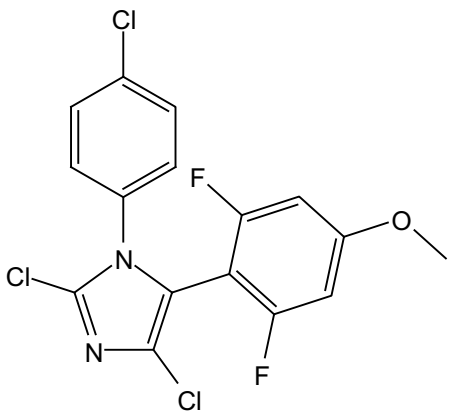

Compound 58

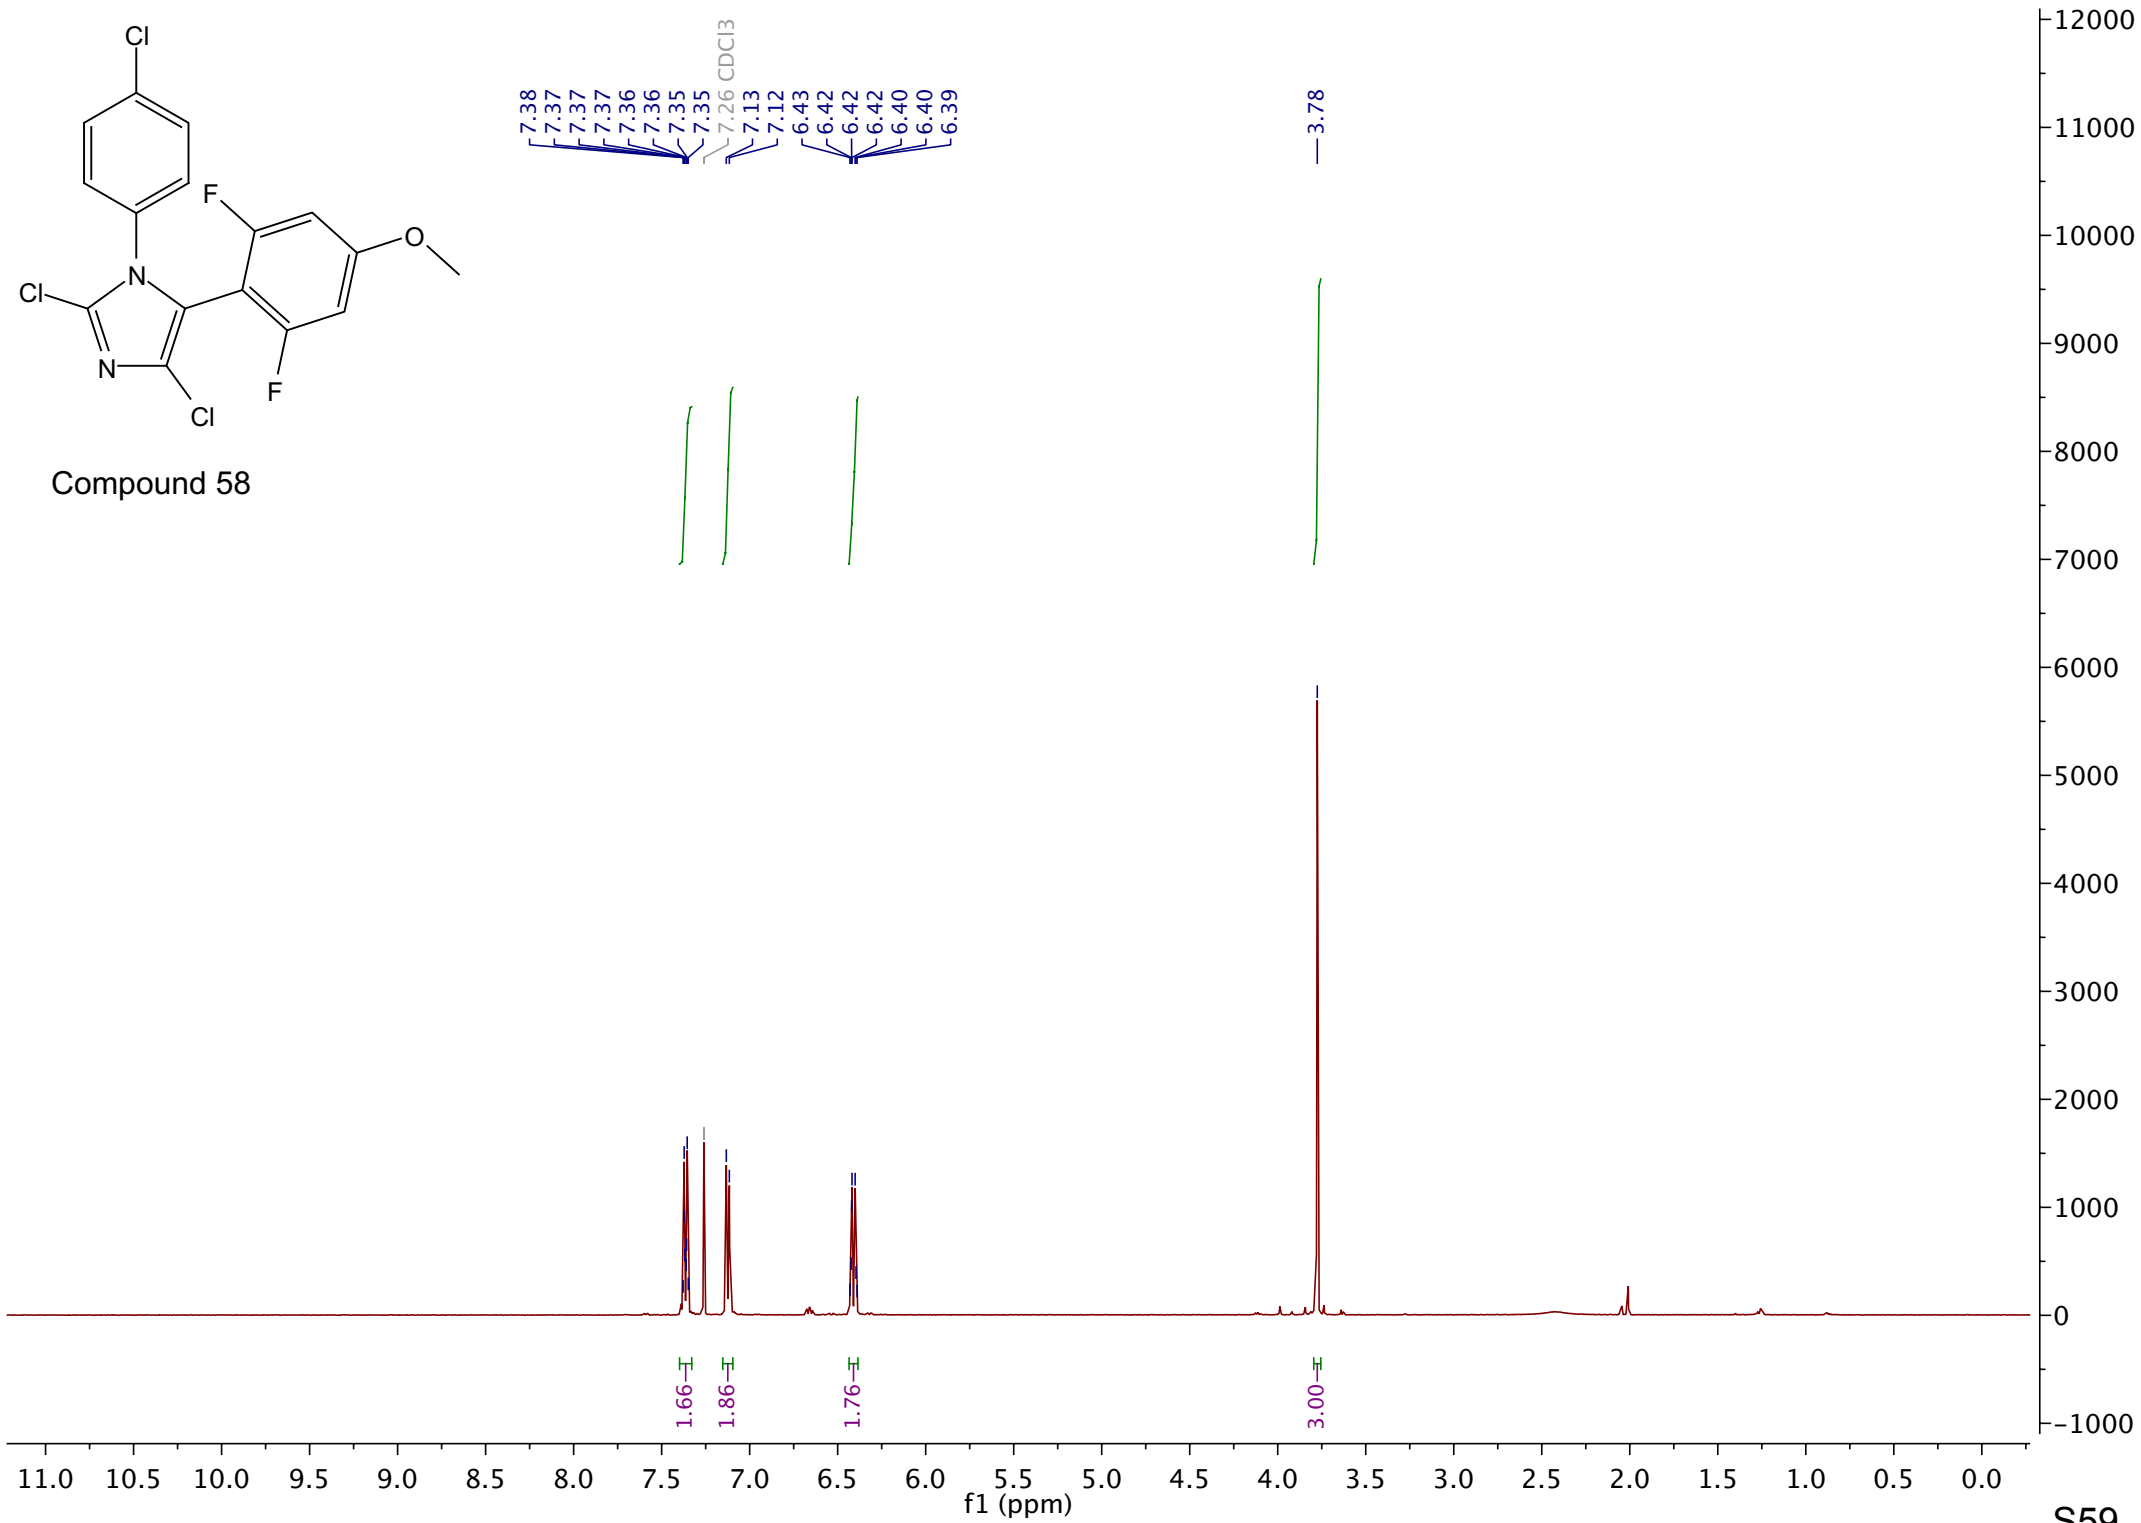

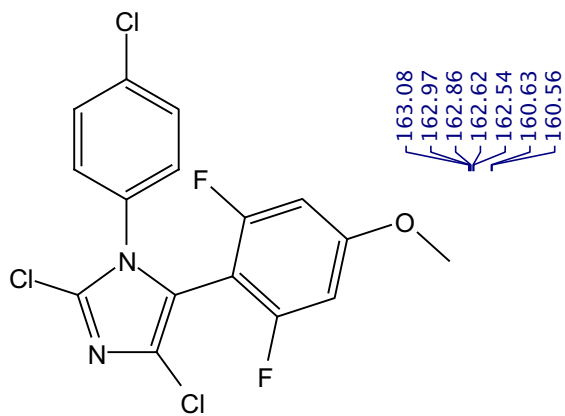

Compound 58

163.08  
162.97  
162.86  
162.62  
162.54  
160.63  
160.56

135.90  
133.24  
132.20  
130.42  
129.75  
128.66

118.83

101.23  
101.20  
101.02  
100.99  
100.81  
100.78  
98.47  
98.45  
98.42  
98.28  
98.25  
98.24  
97.19  
97.03  
96.86  
77.16 CDCl3

56.07

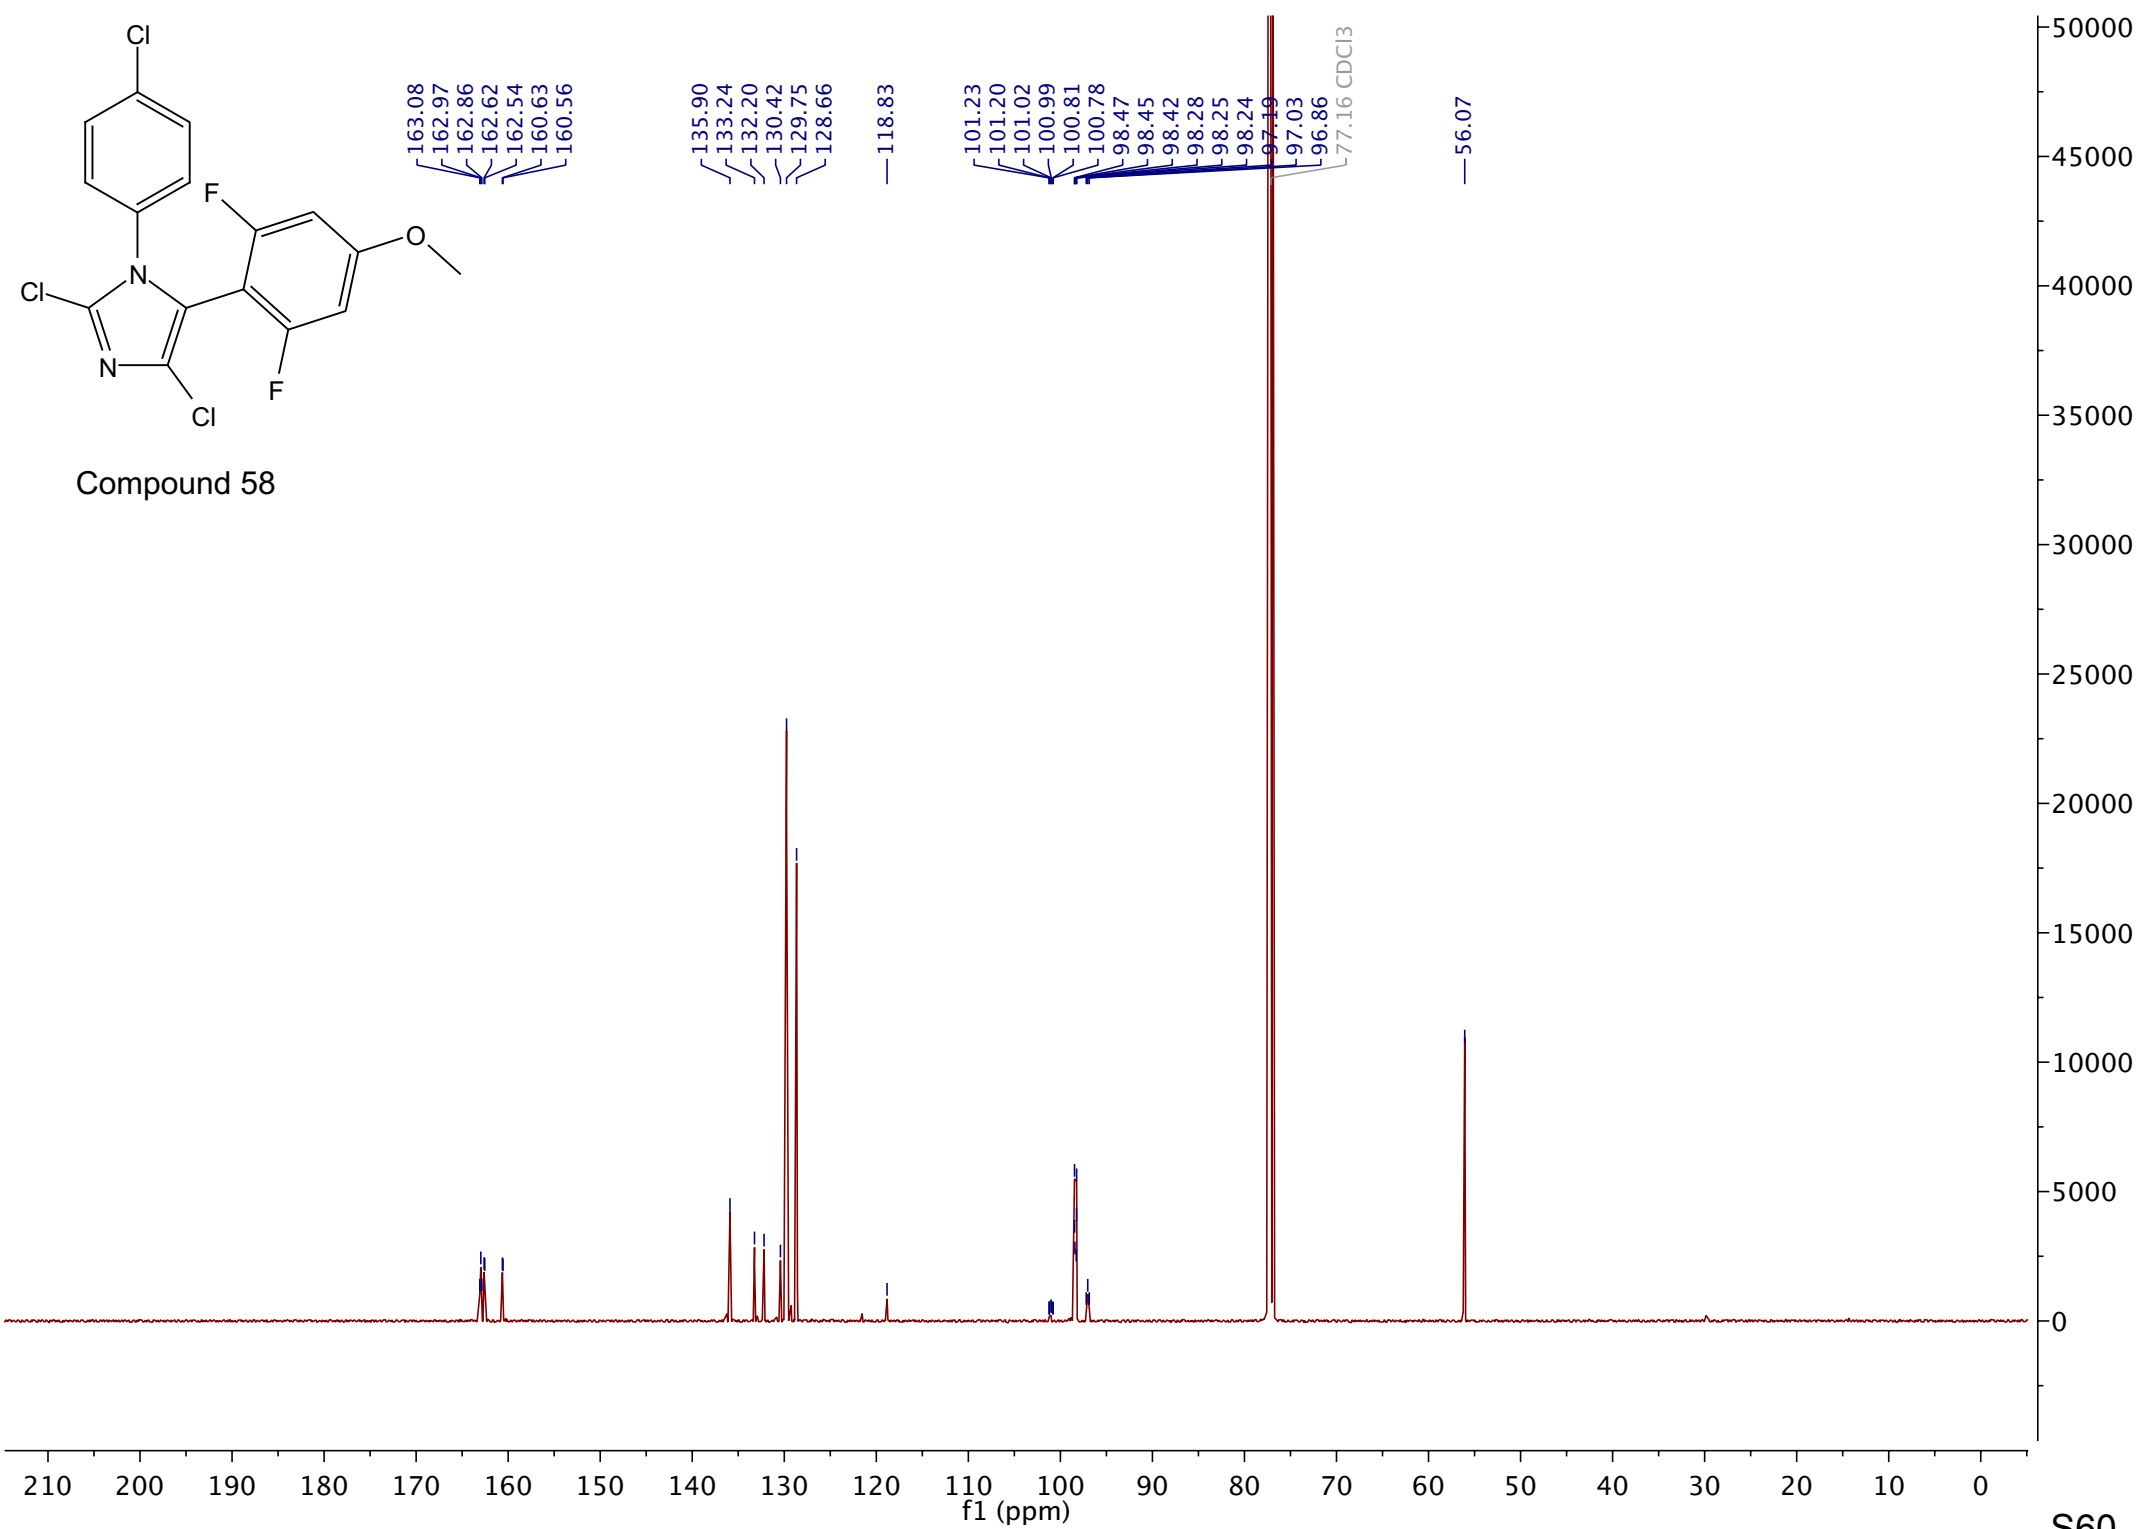

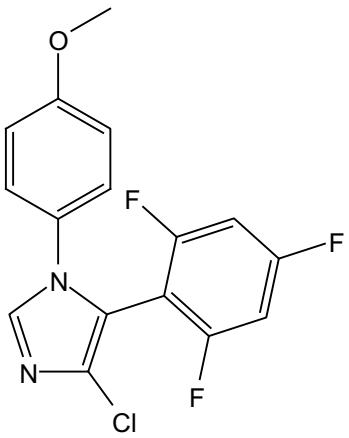

Compound 59

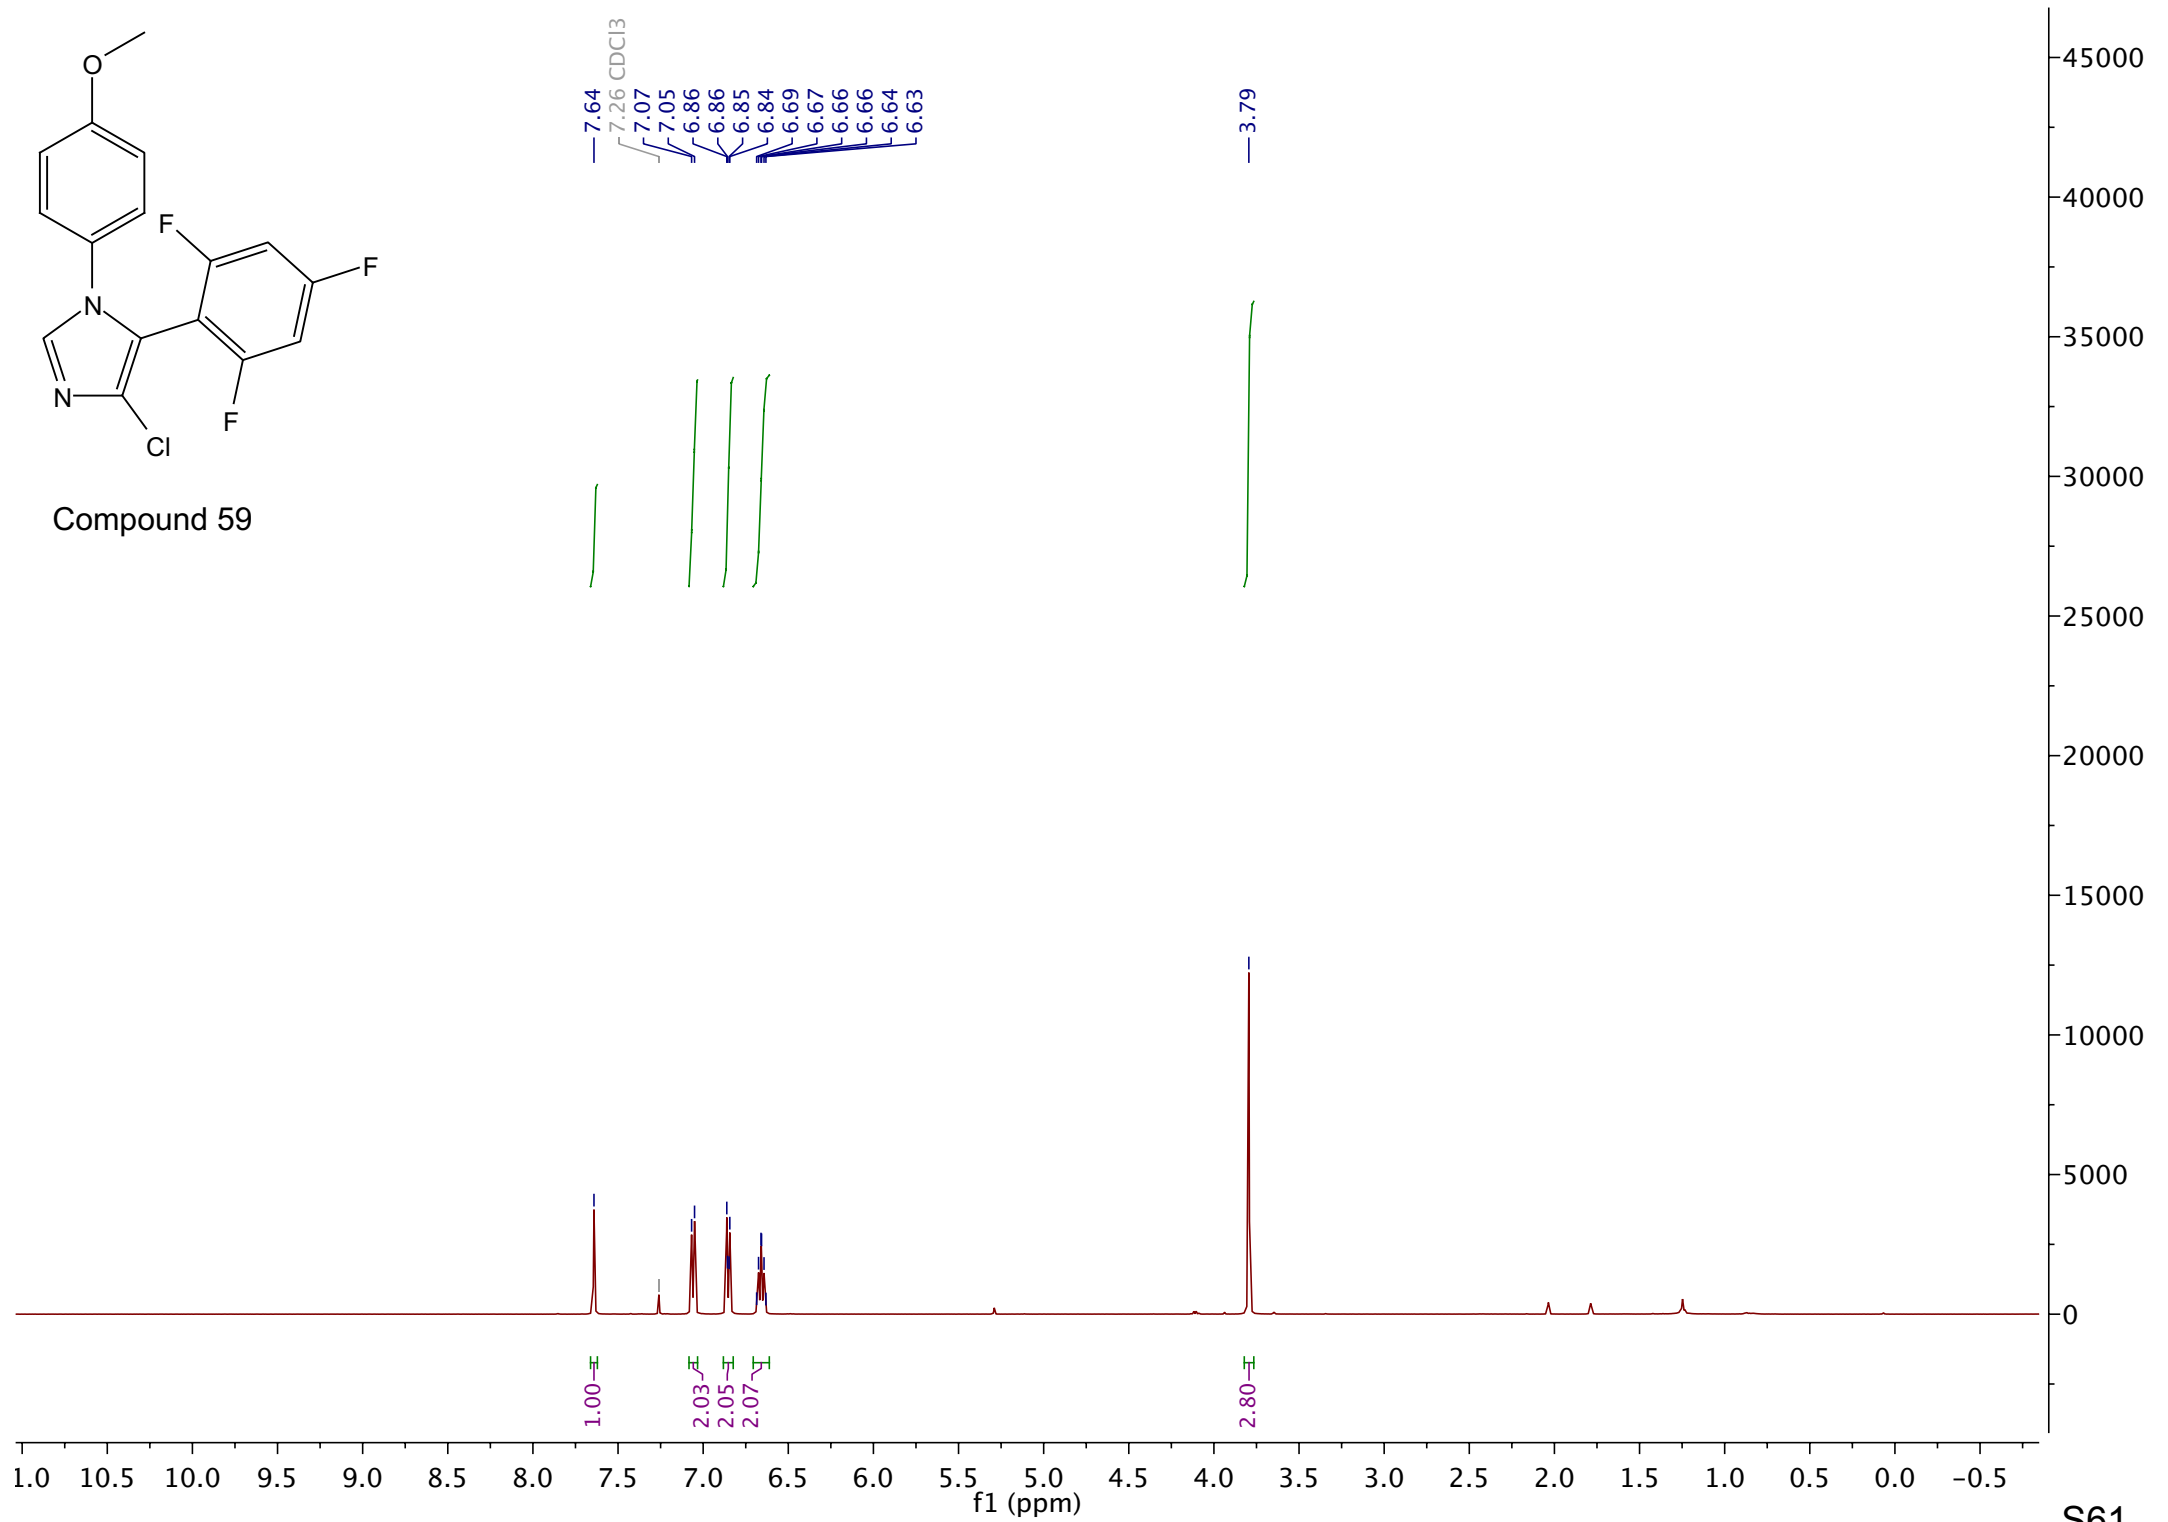

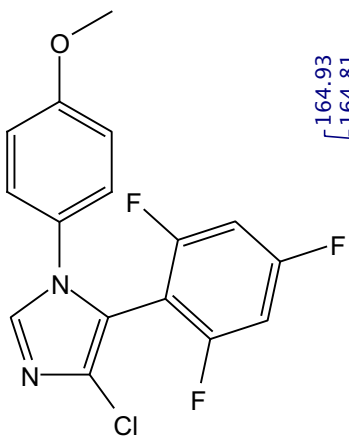

Compound 59

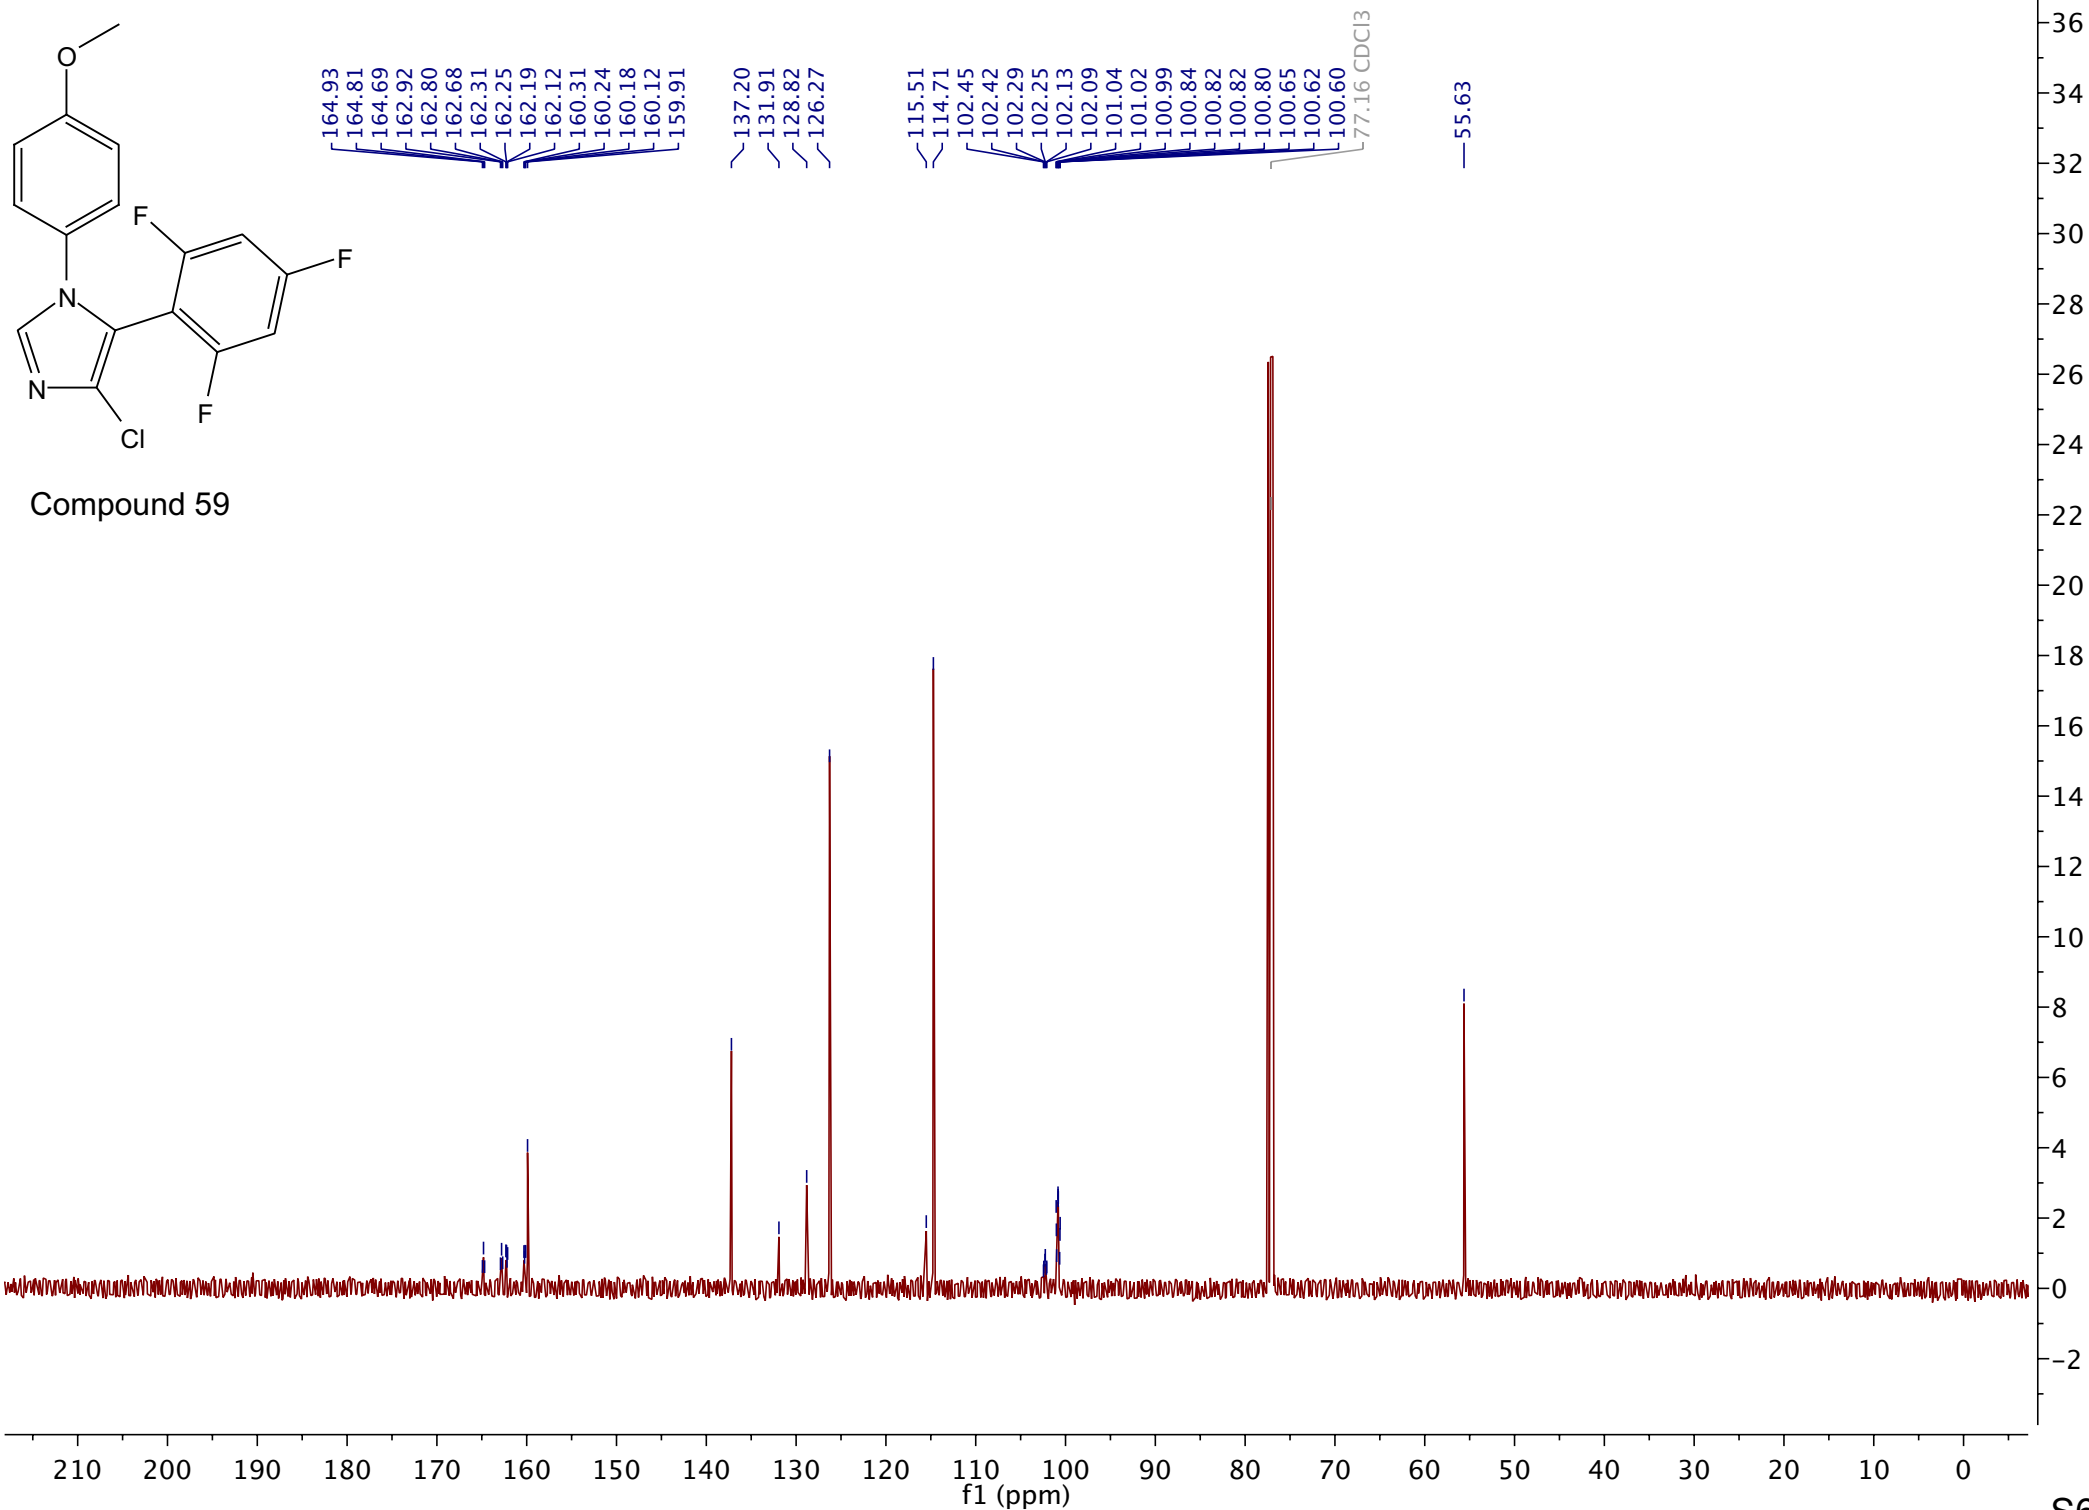

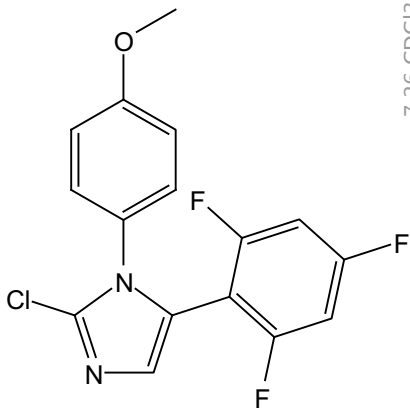

Compound 60

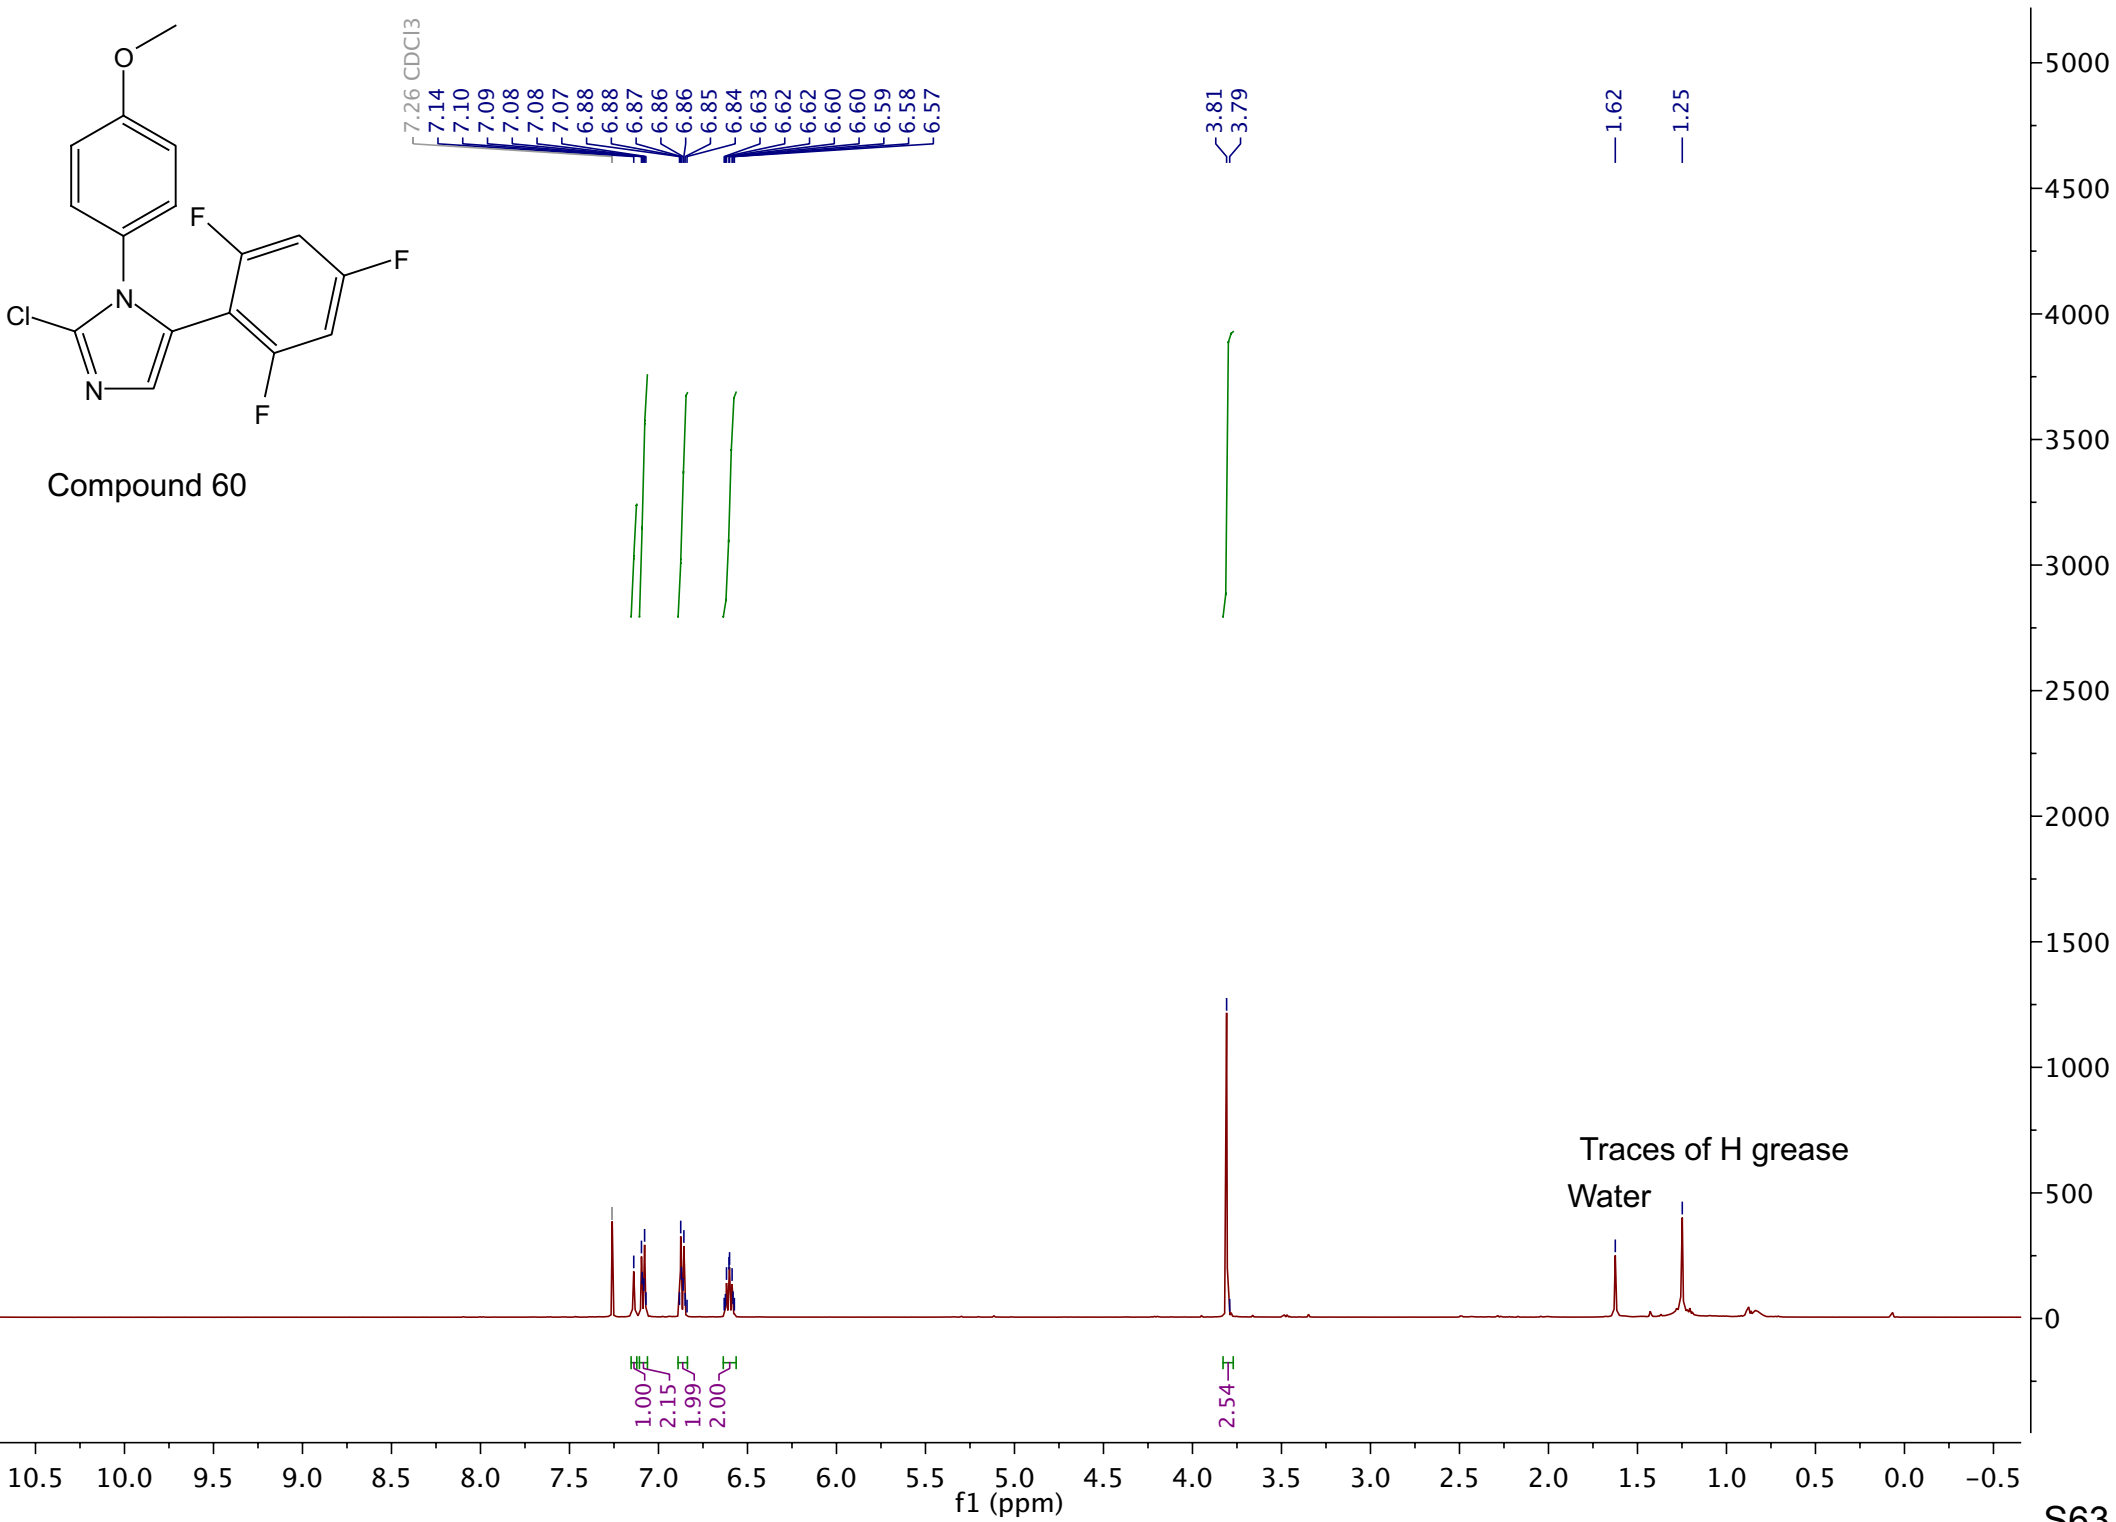

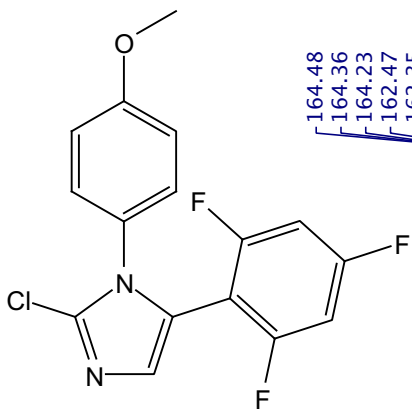

Compound 60

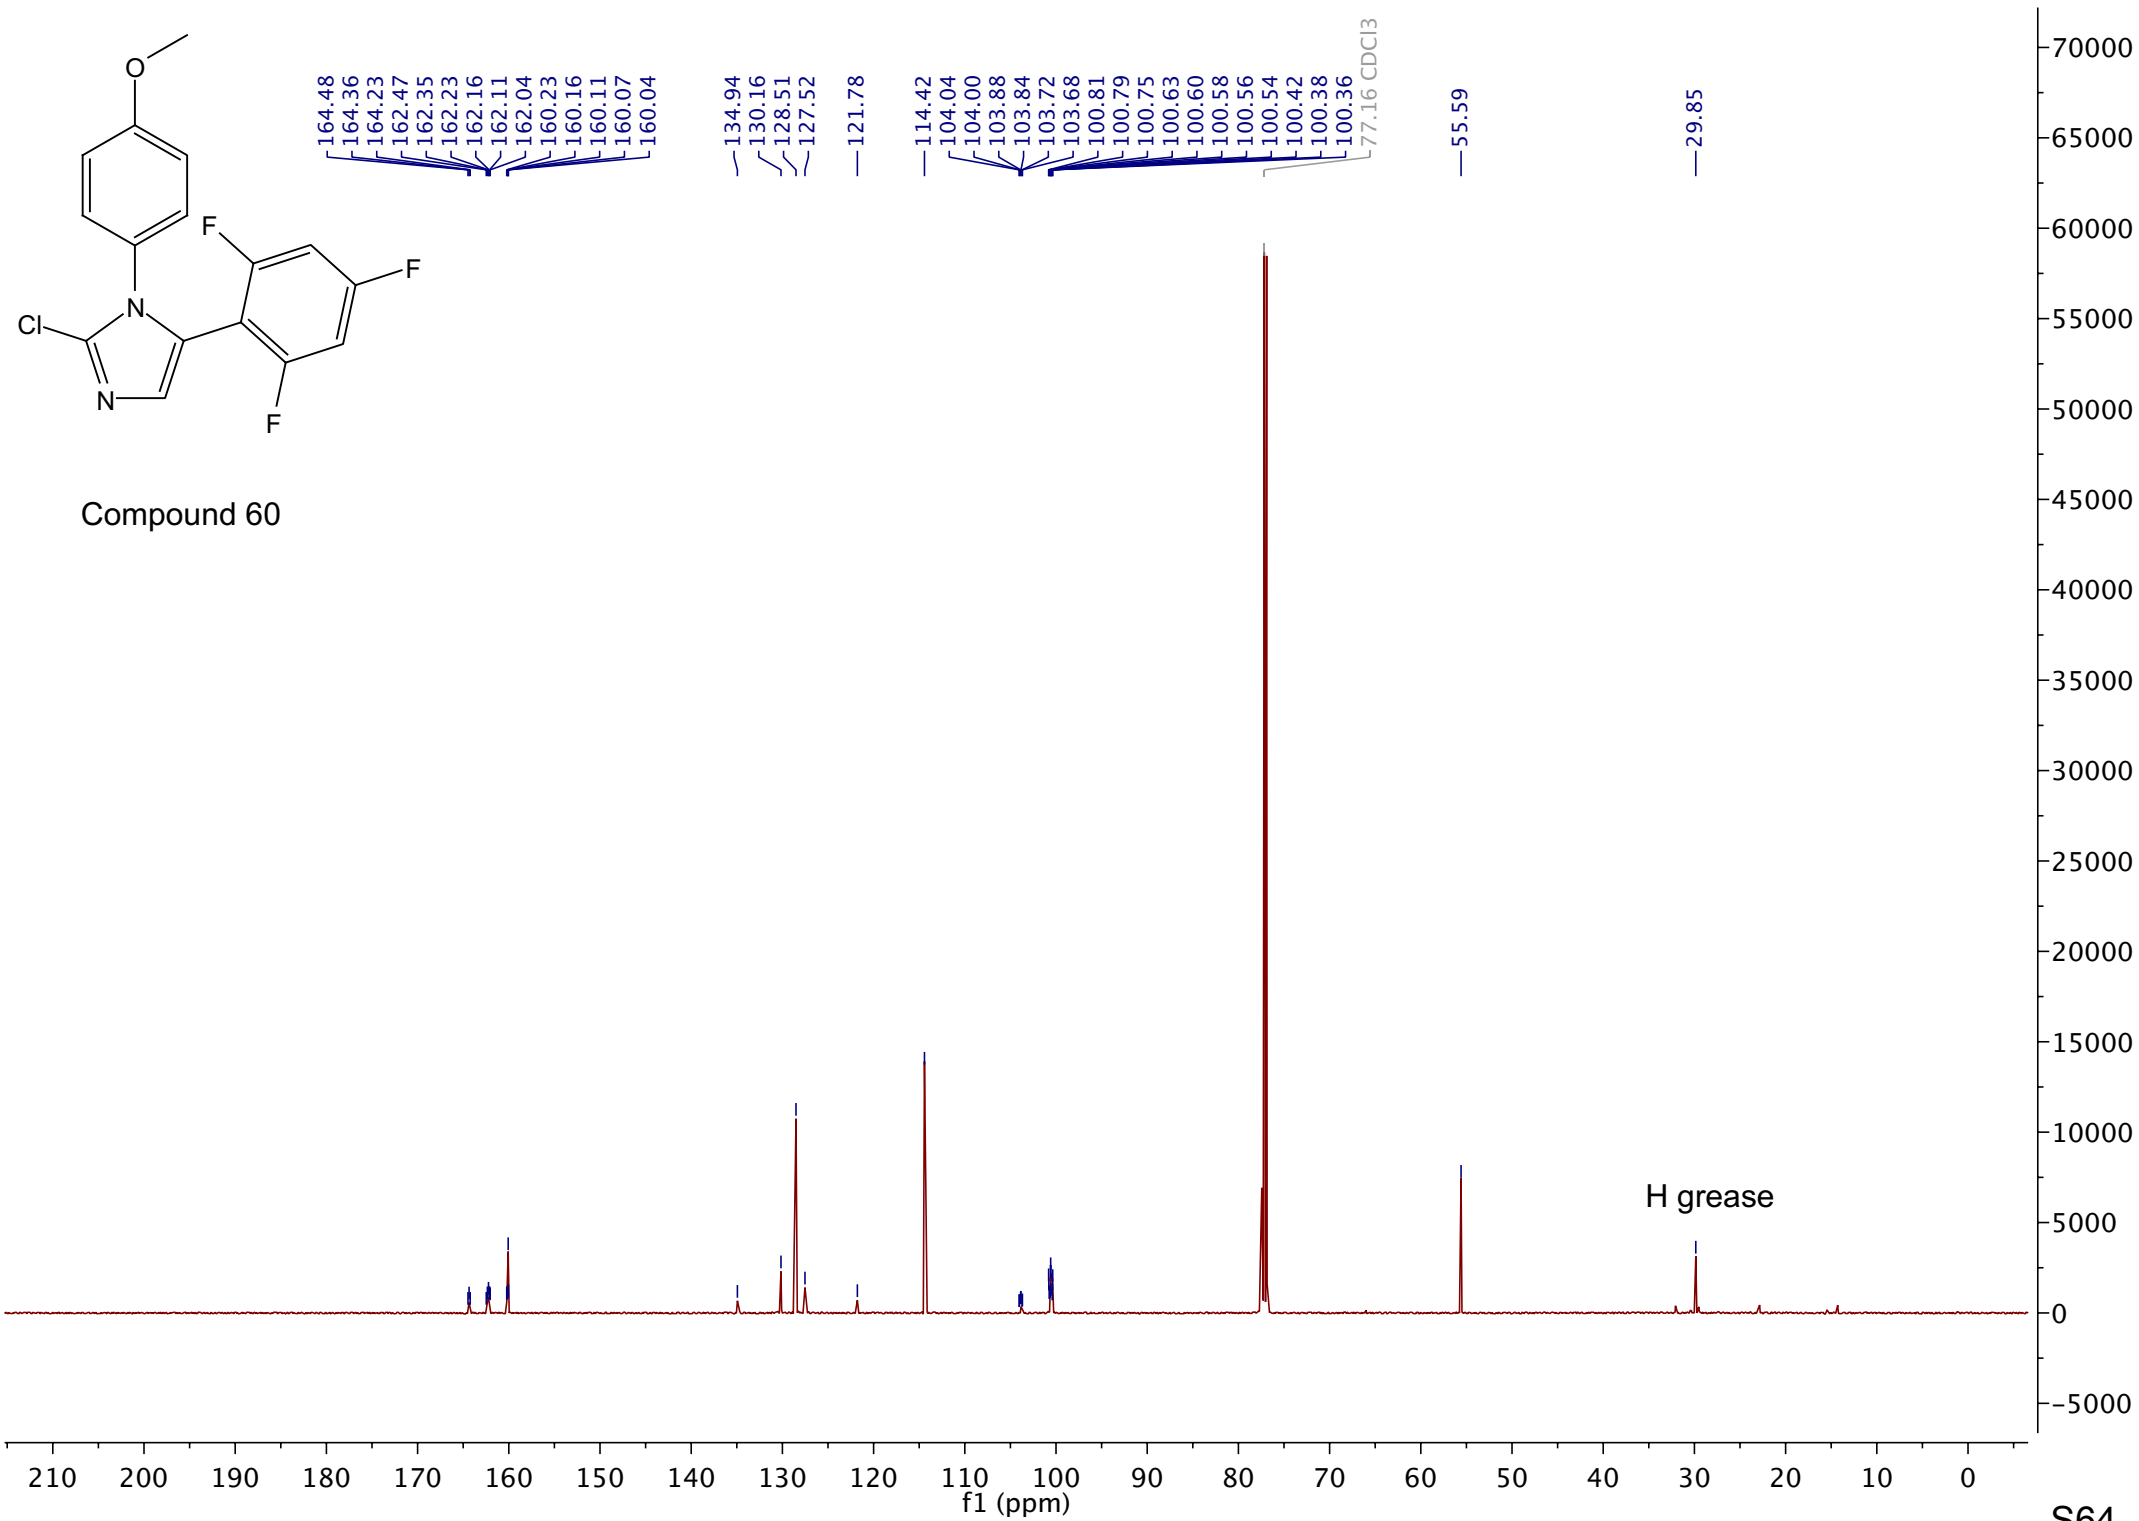



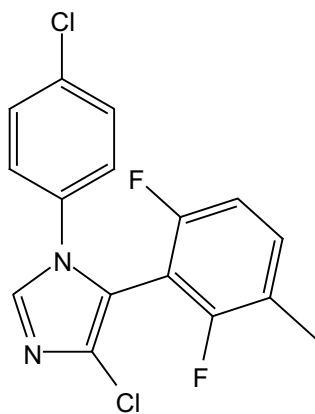

Compound 62

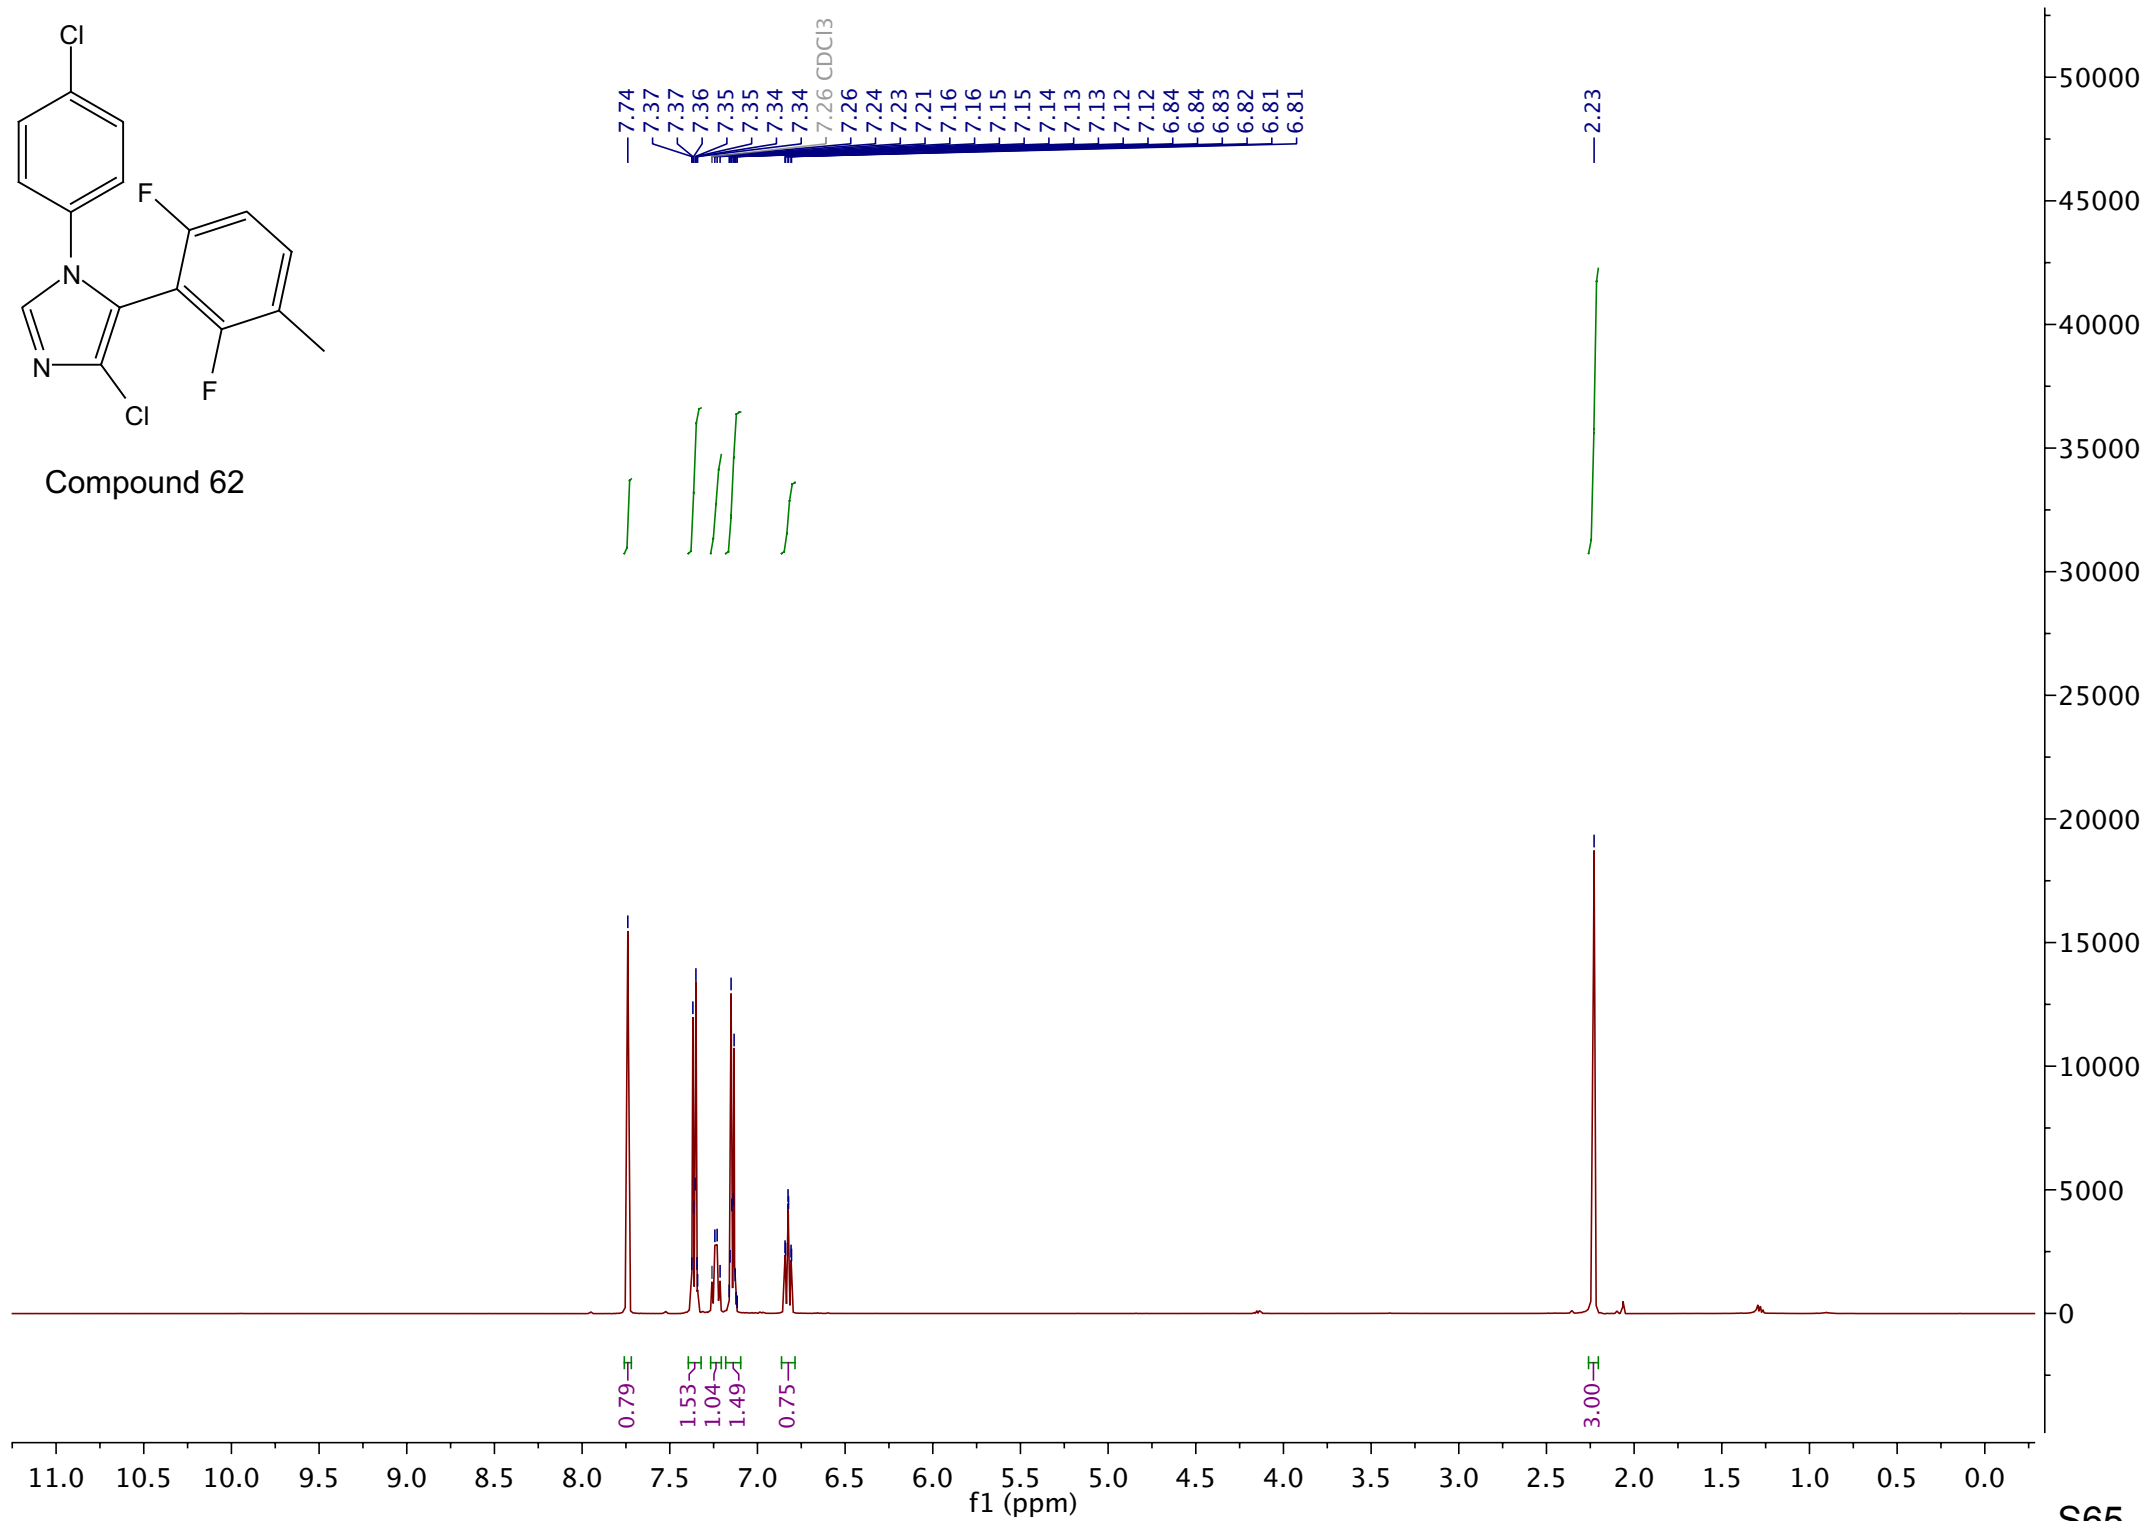

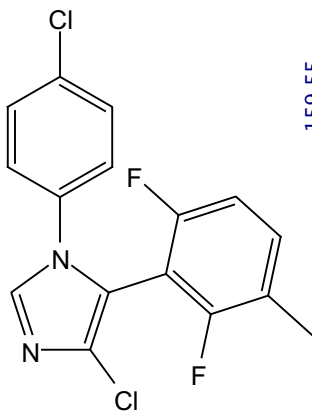

Compound 62

159.55  
159.51  
159.46  
159.41  
157.57  
157.53  
157.47  
157.42  
136.49  
134.58  
134.56  
133.27  
133.21  
133.19  
133.13  
131.96  
129.69  
125.74  
121.12  
121.09  
120.98  
120.95  
116.38  
111.05  
111.02  
110.88  
110.85  
104.69  
104.53  
104.37

—77.16 CDCl<sub>3</sub>

14.12  
14.09

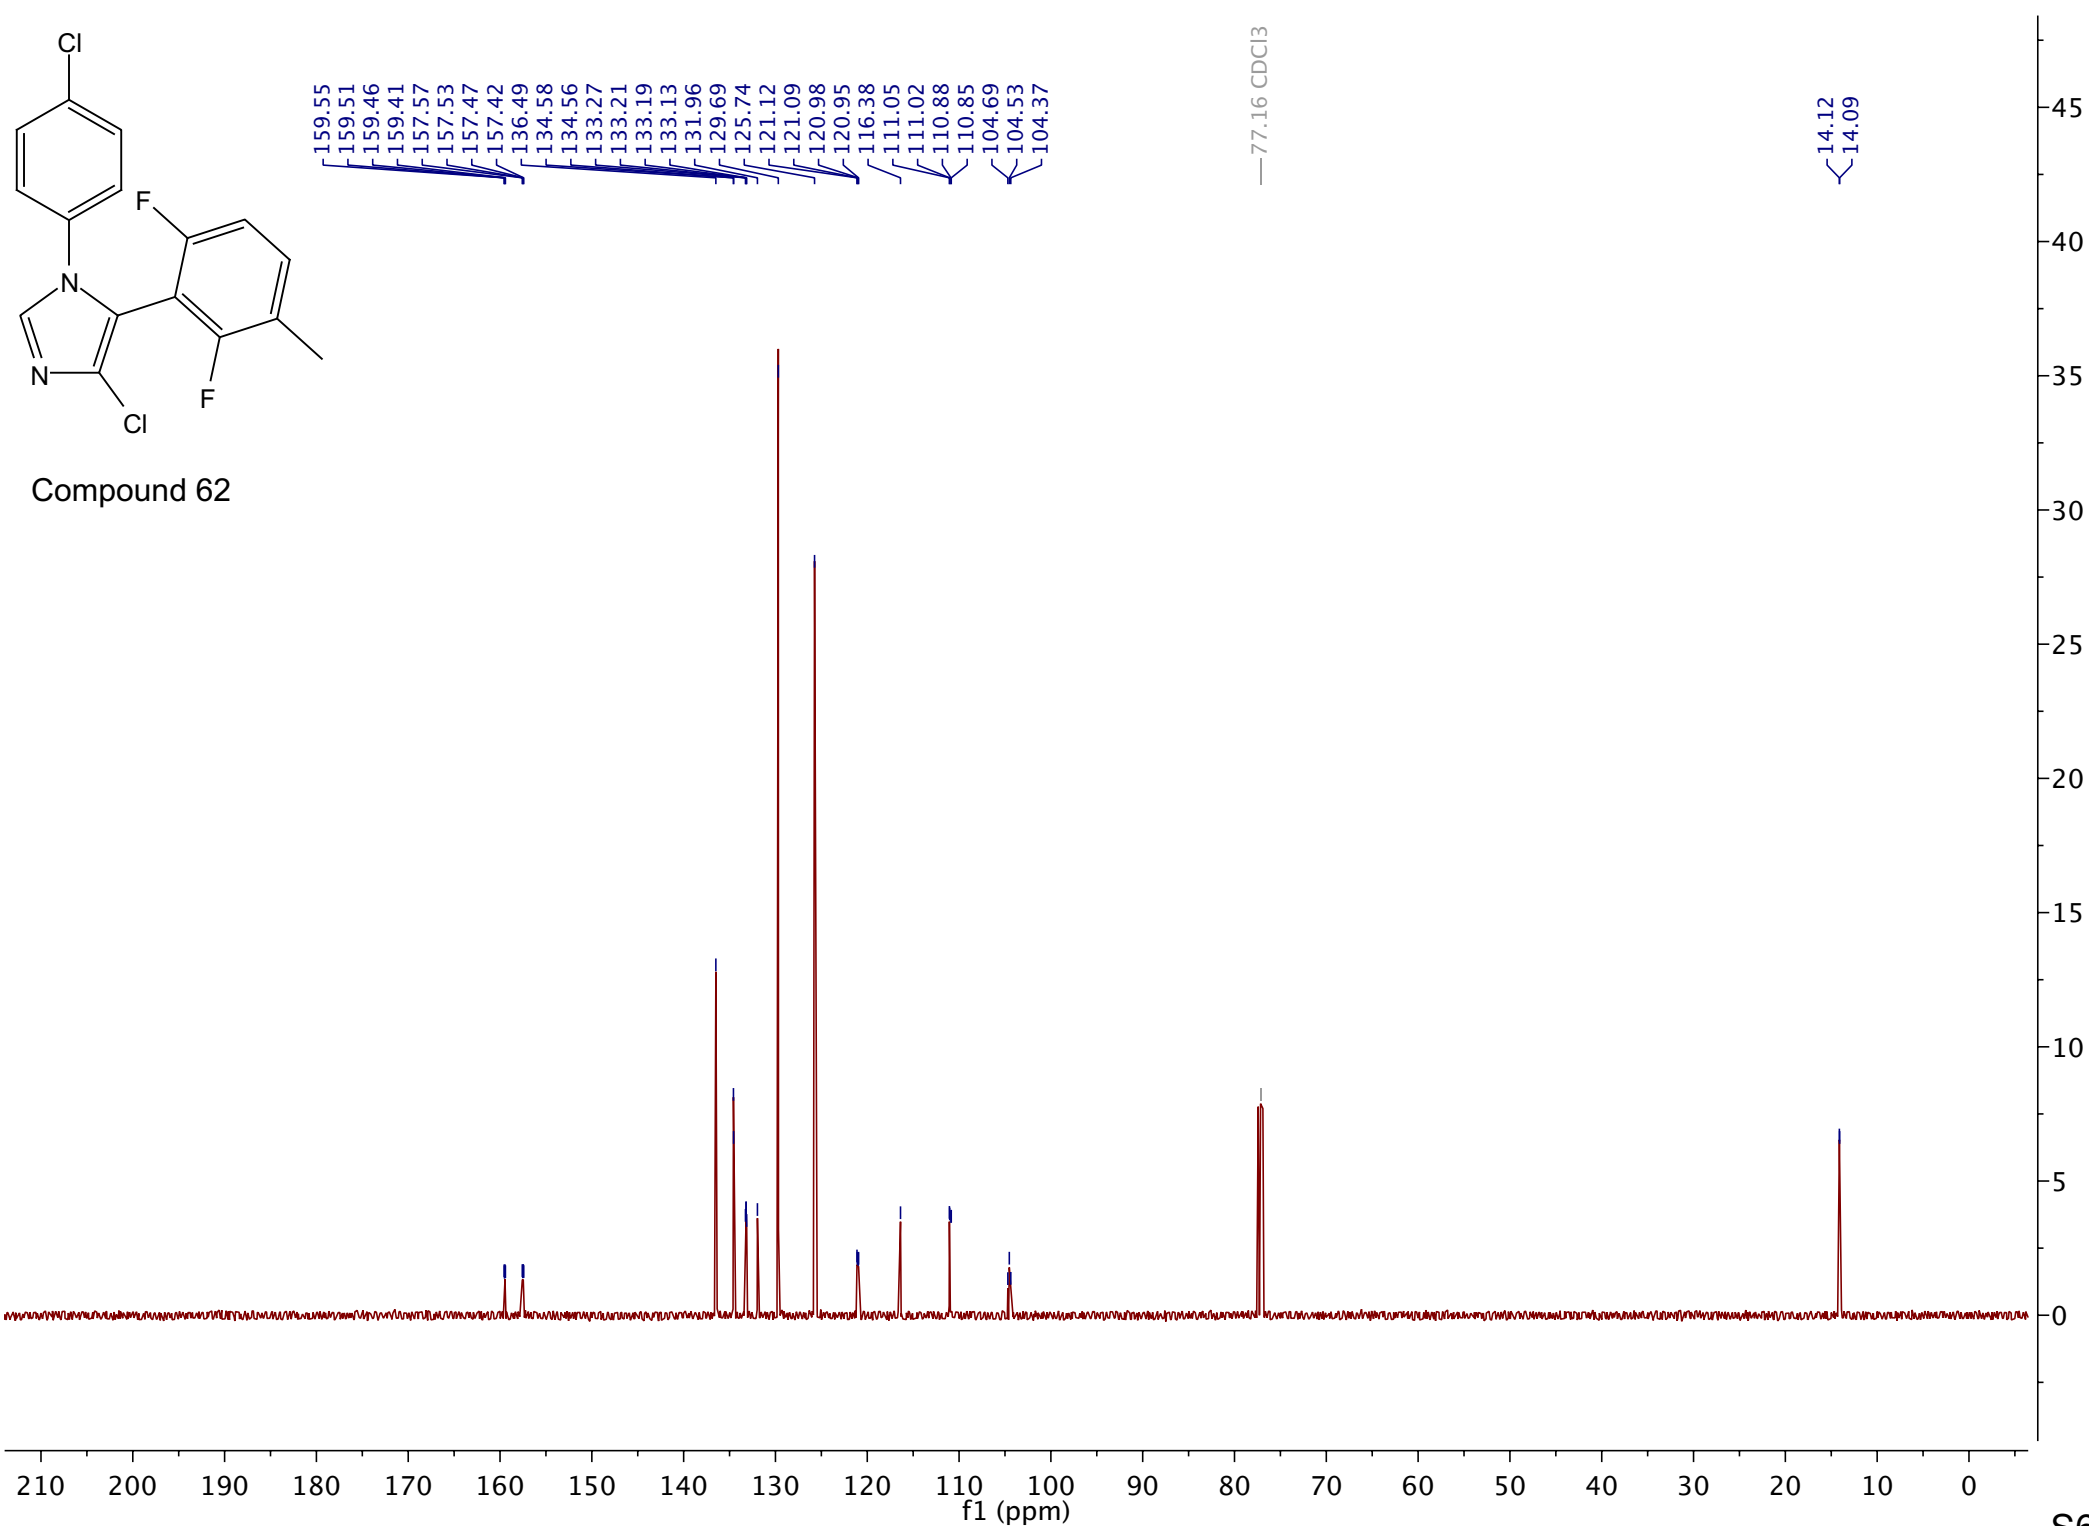

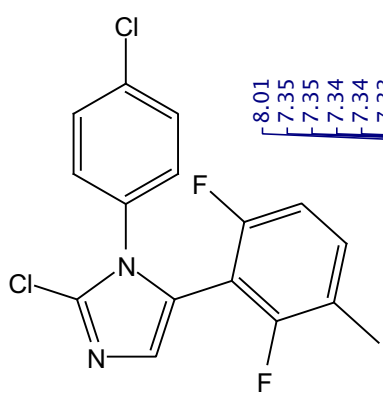

Compound 63

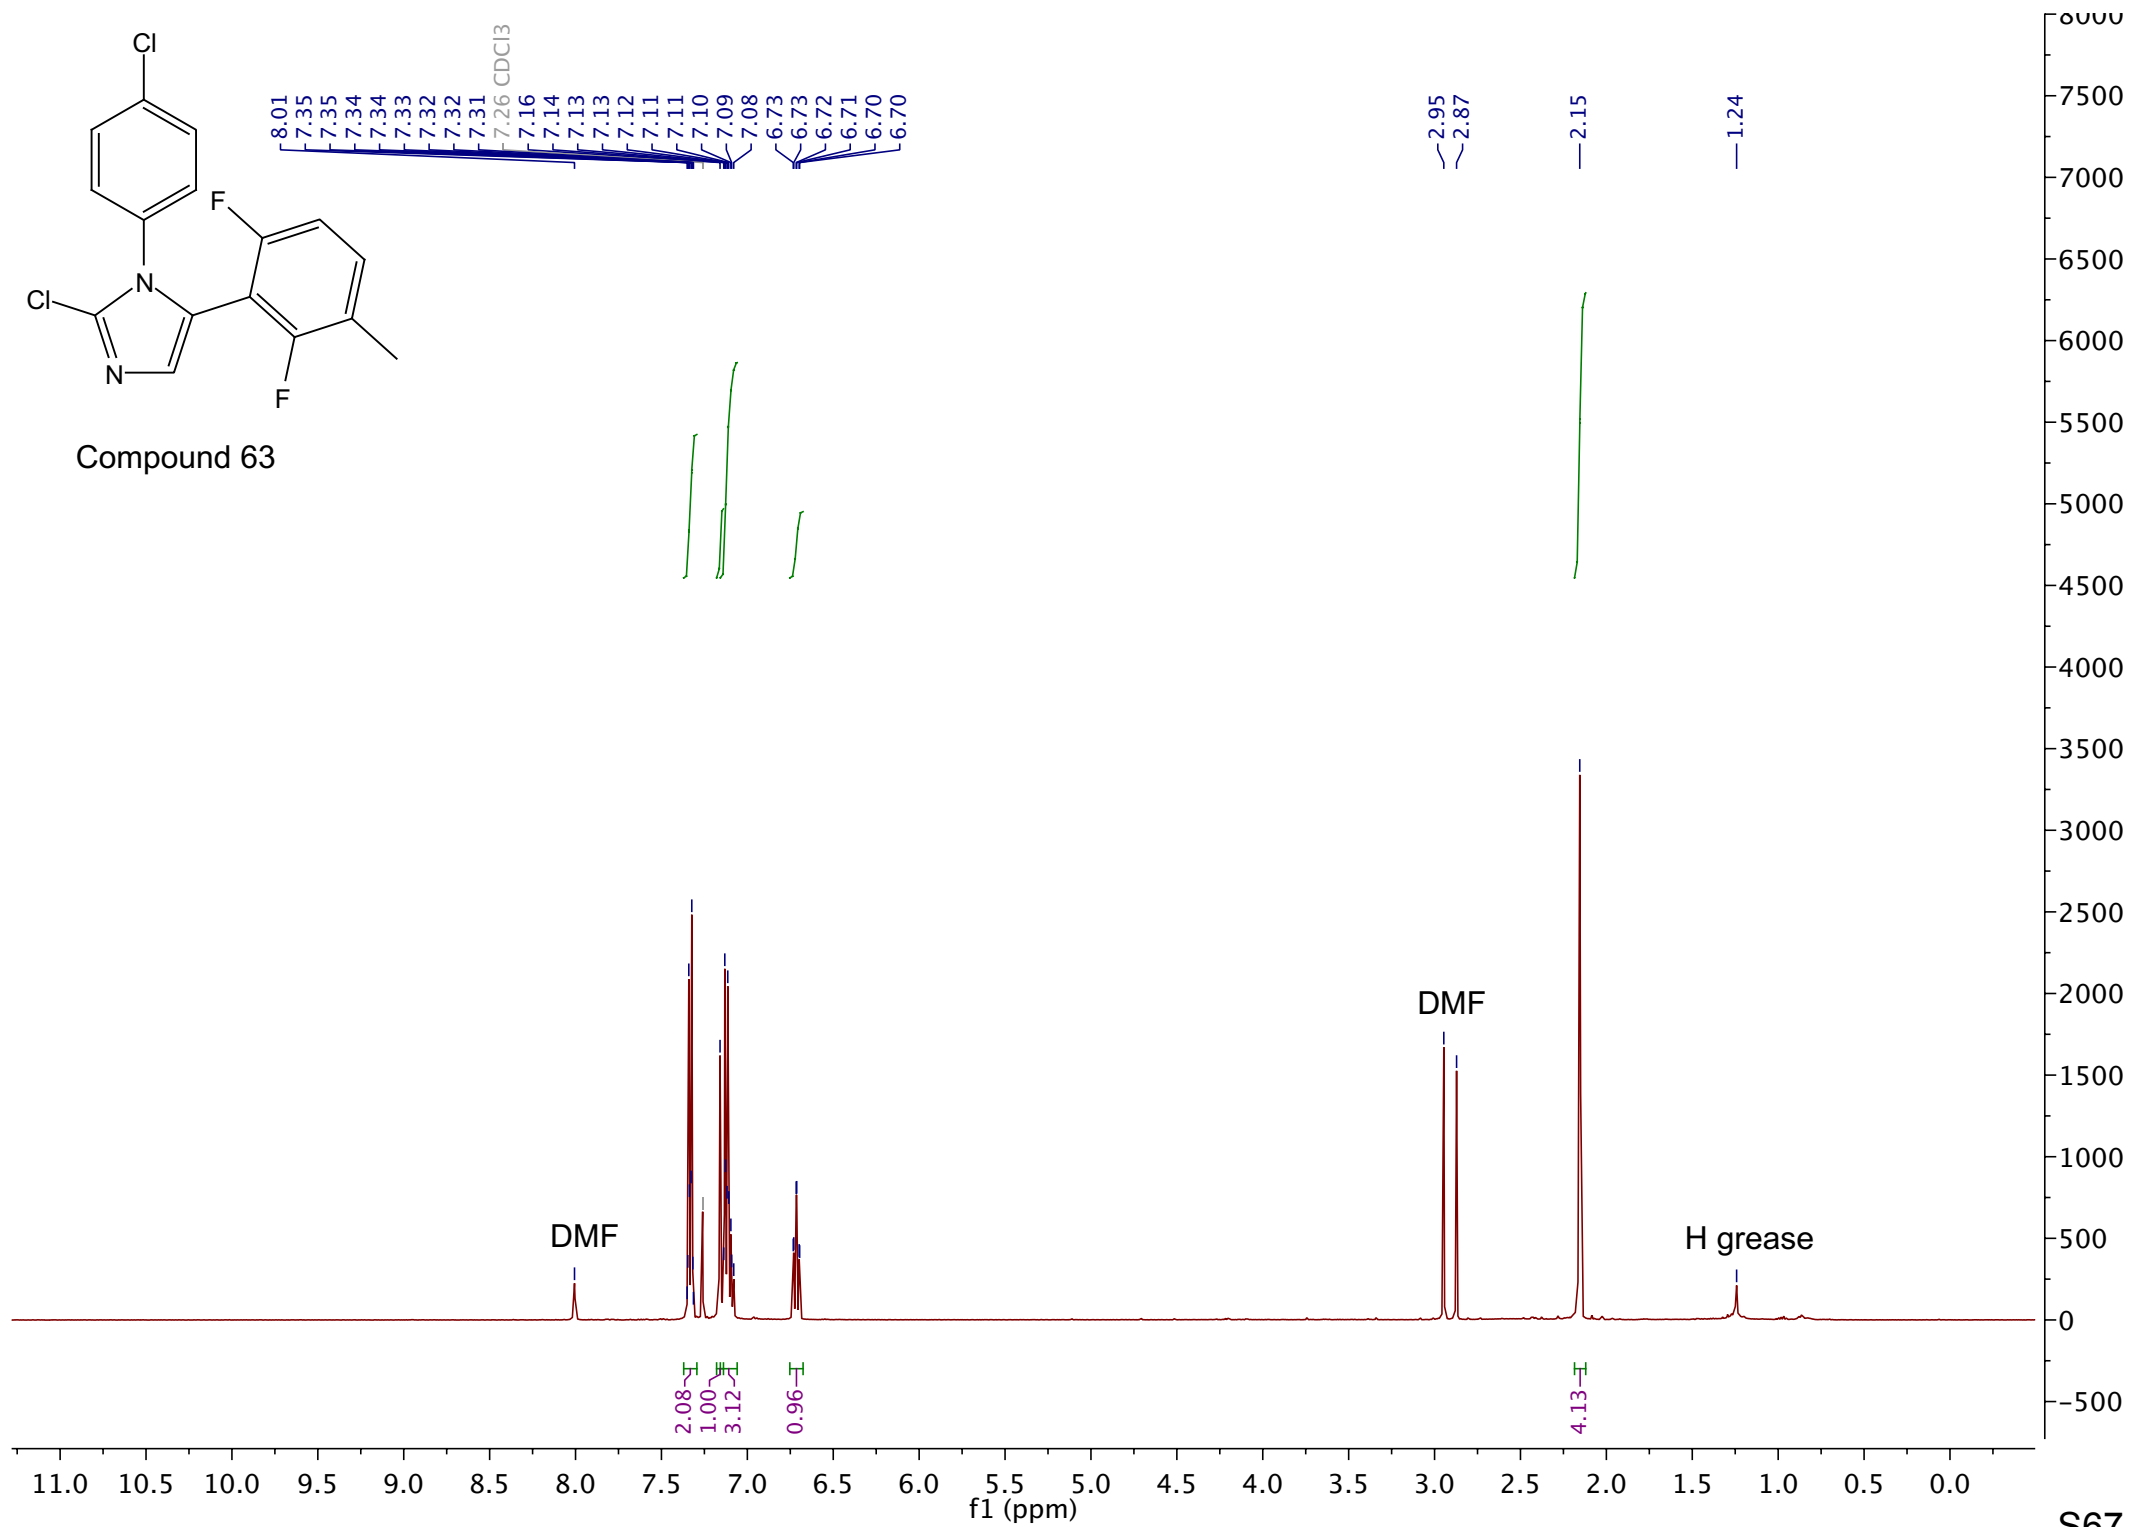

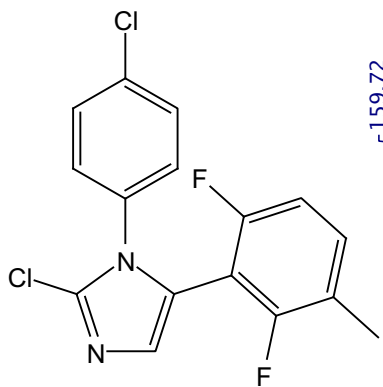

Compound 63

159.72  
159.68  
159.62  
159.57  
157.75  
157.71  
157.64  
157.59  
135.30  
134.12  
133.71  
132.73  
132.68  
132.65  
132.60  
130.33  
129.48  
128.68  
123.01  
121.04  
121.01  
120.98  
120.89  
120.86  
110.98  
110.95  
110.87  
110.81  
110.78  
110.78  
106.49  
106.46  
106.33  
106.29  
106.17

—77.16 CDCl<sub>3</sub>

14.28  
14.25

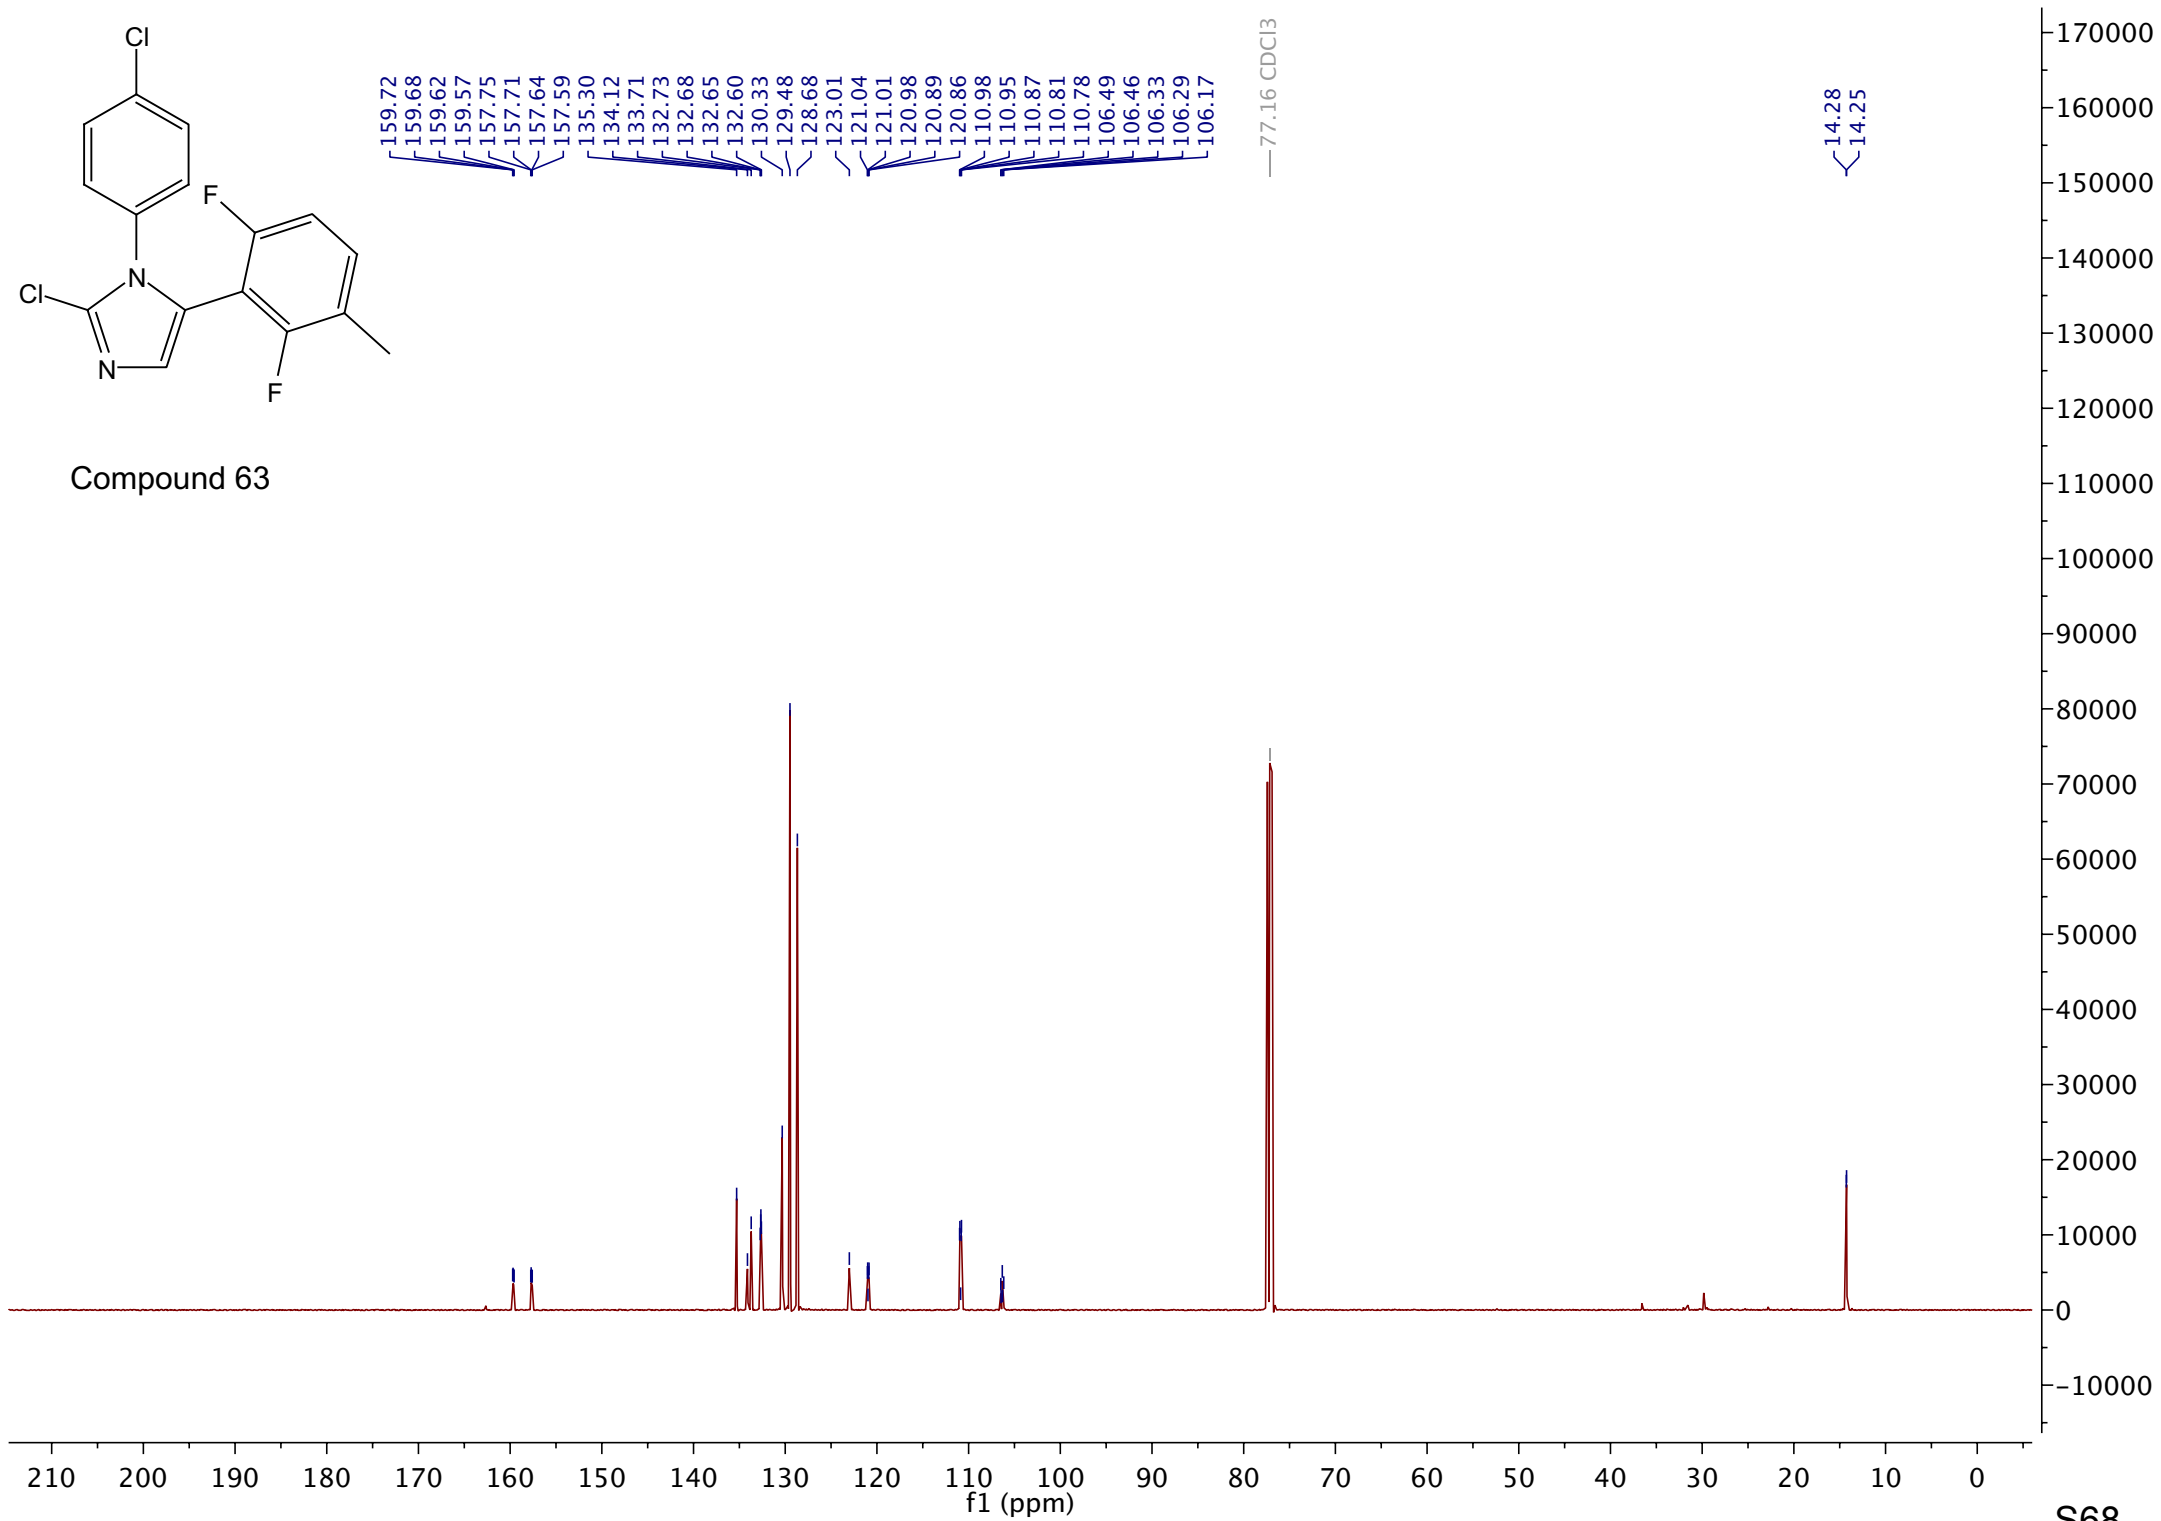

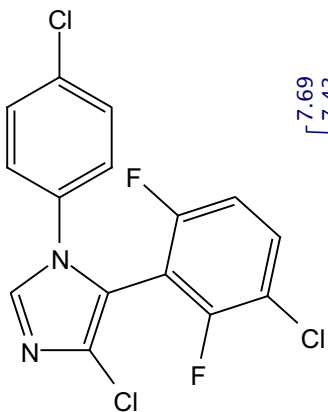

Compound 64

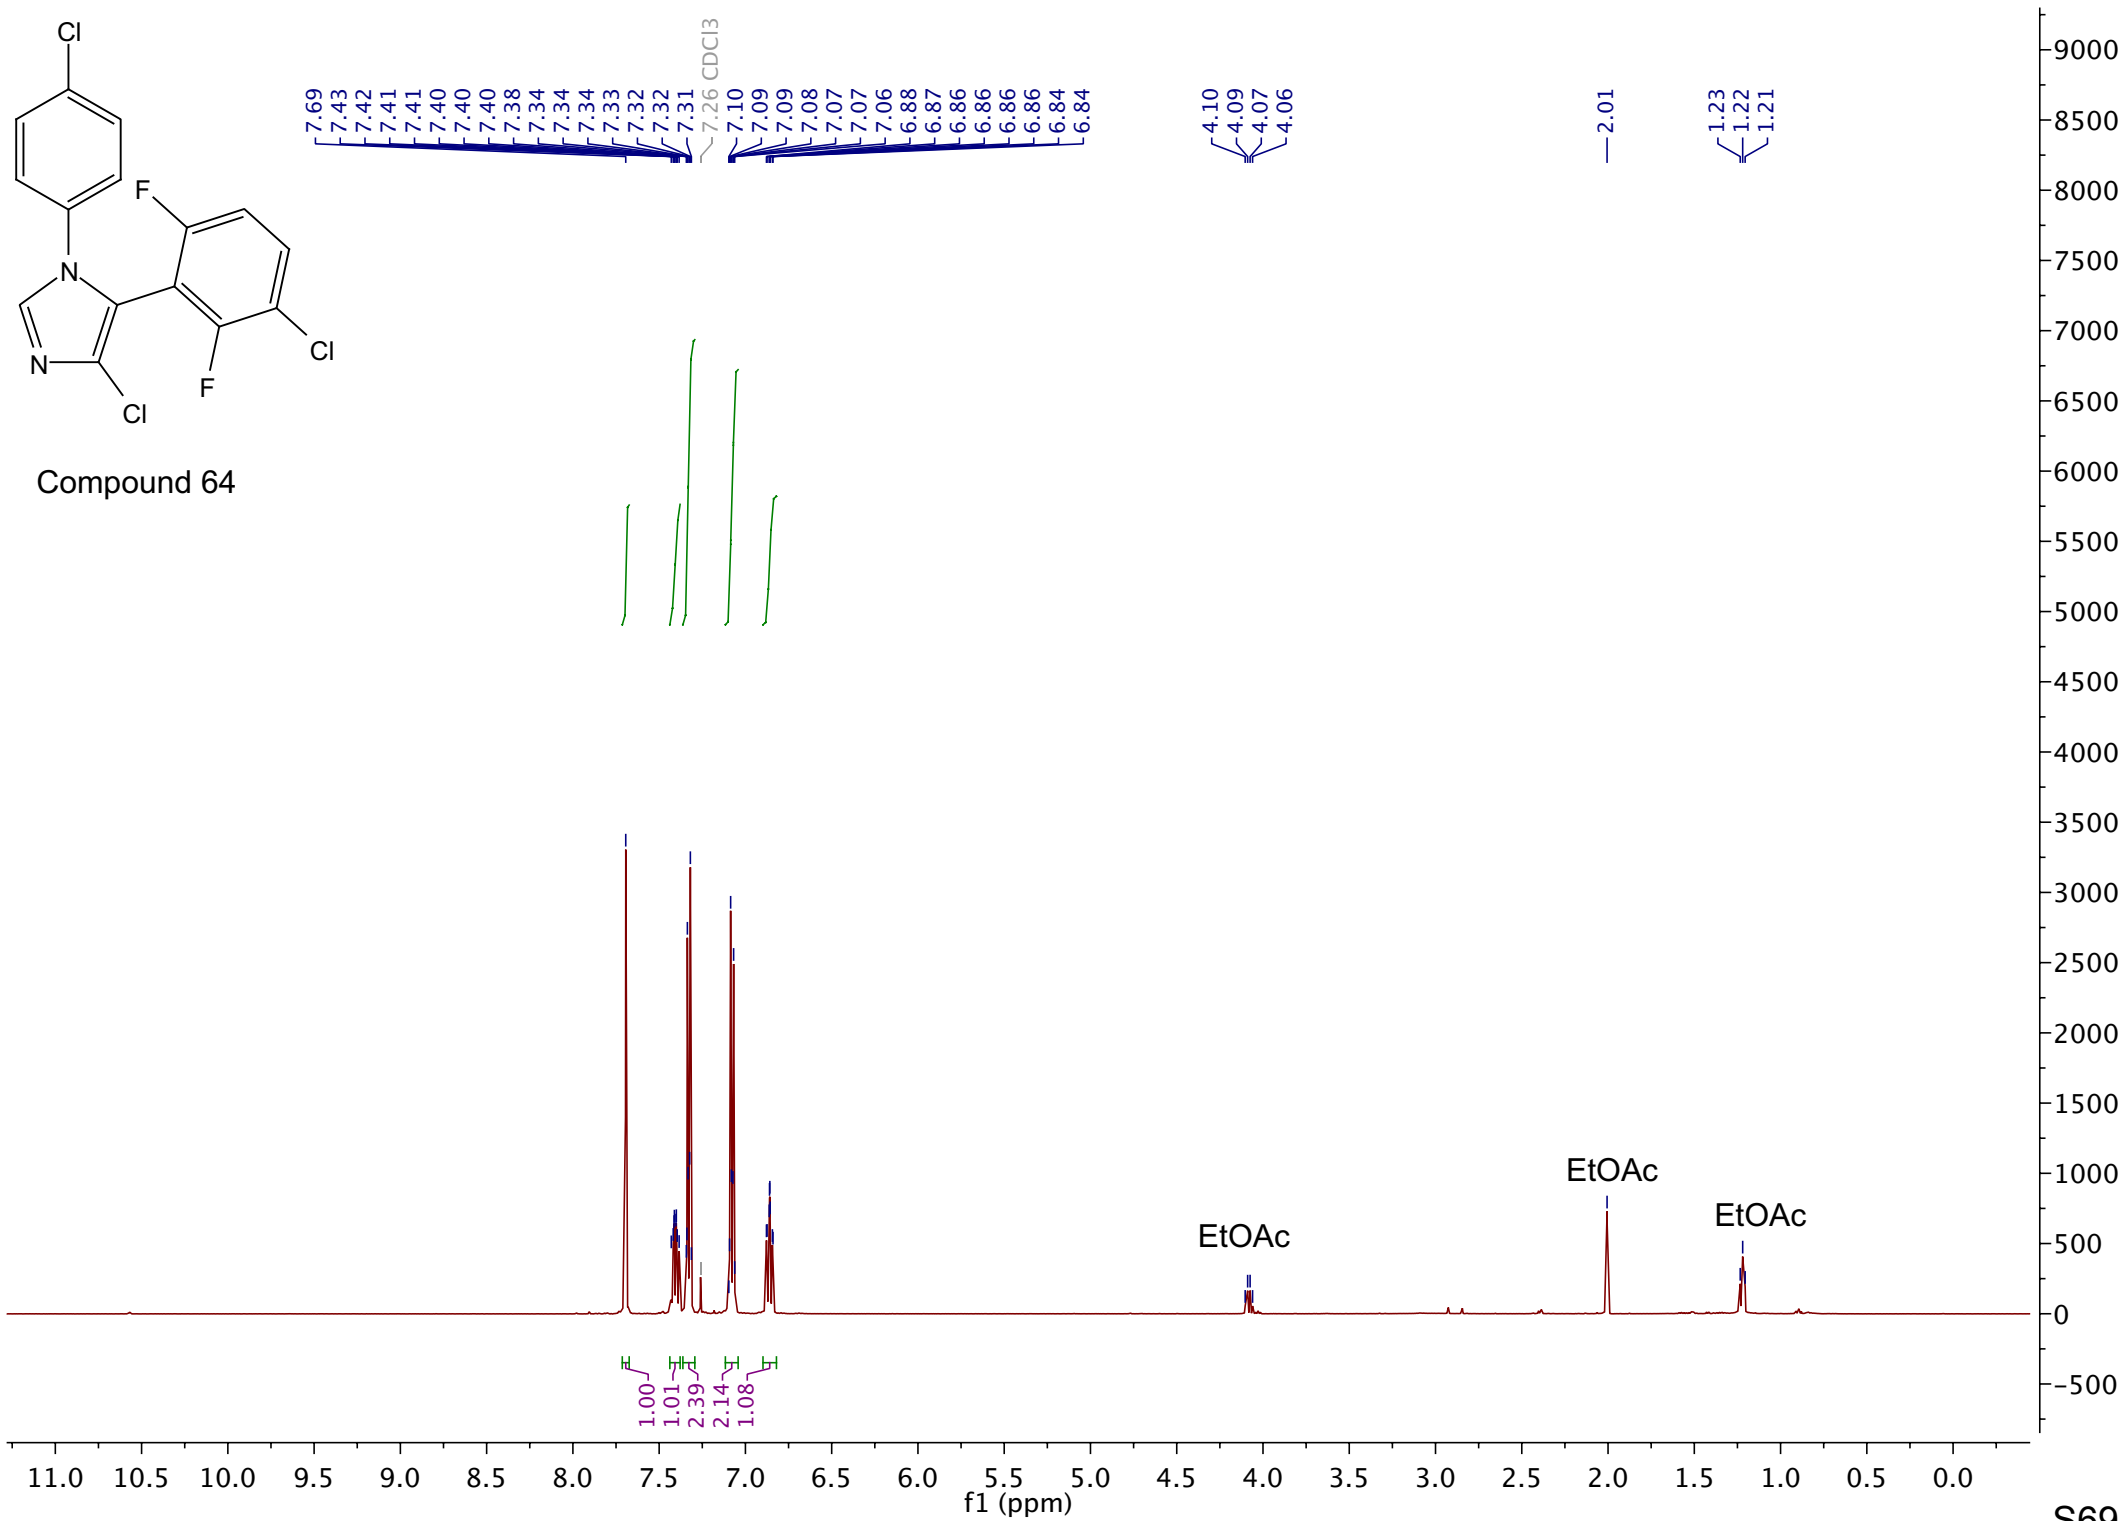

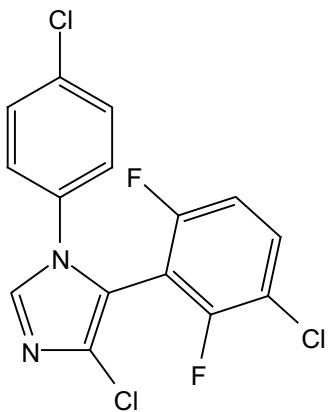

Compound 64

159.81  
159.78  
157.81  
157.77  
156.92  
156.87  
154.90  
154.85  
137.09  
135.06  
134.27  
132.65  
132.32  
132.25  
129.97  
125.85  
117.35  
117.32  
117.20  
117.17  
115.25  
112.48  
112.44  
112.29  
112.26  
106.95  
106.79  
106.63

— 77.16 CDCl<sub>3</sub>

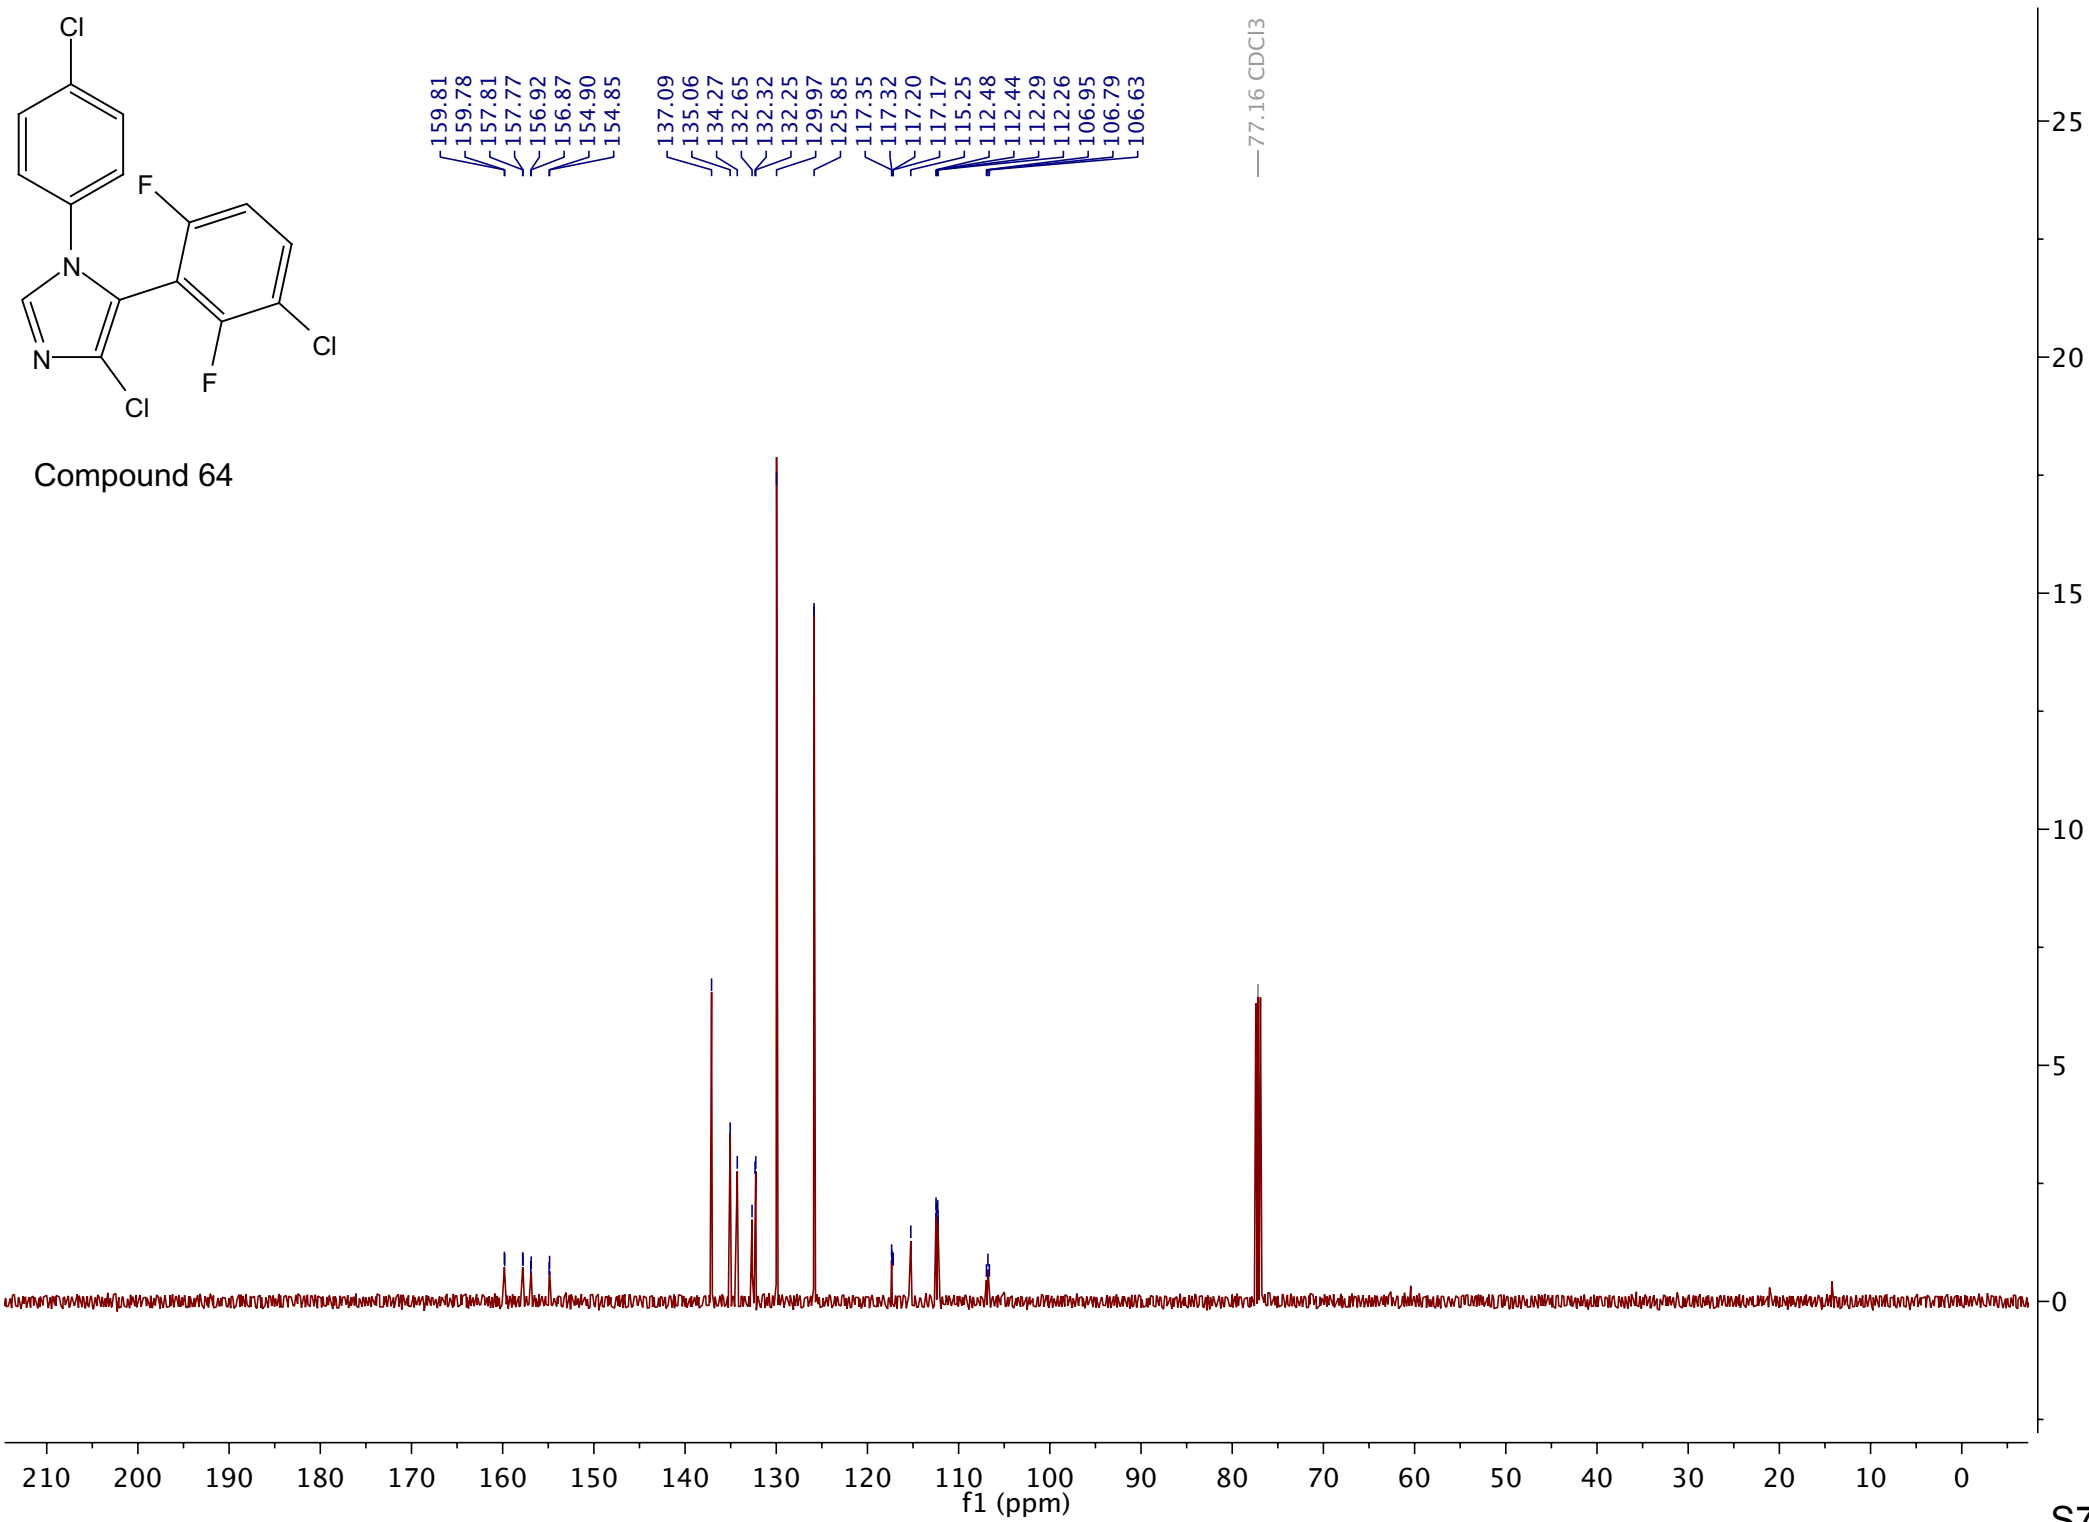

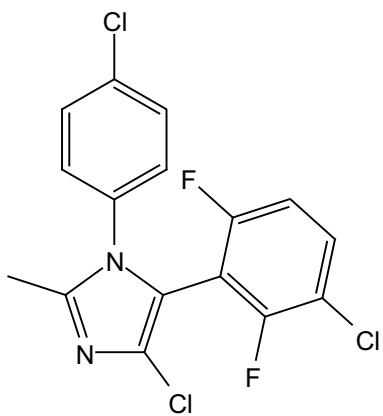

Compound 65

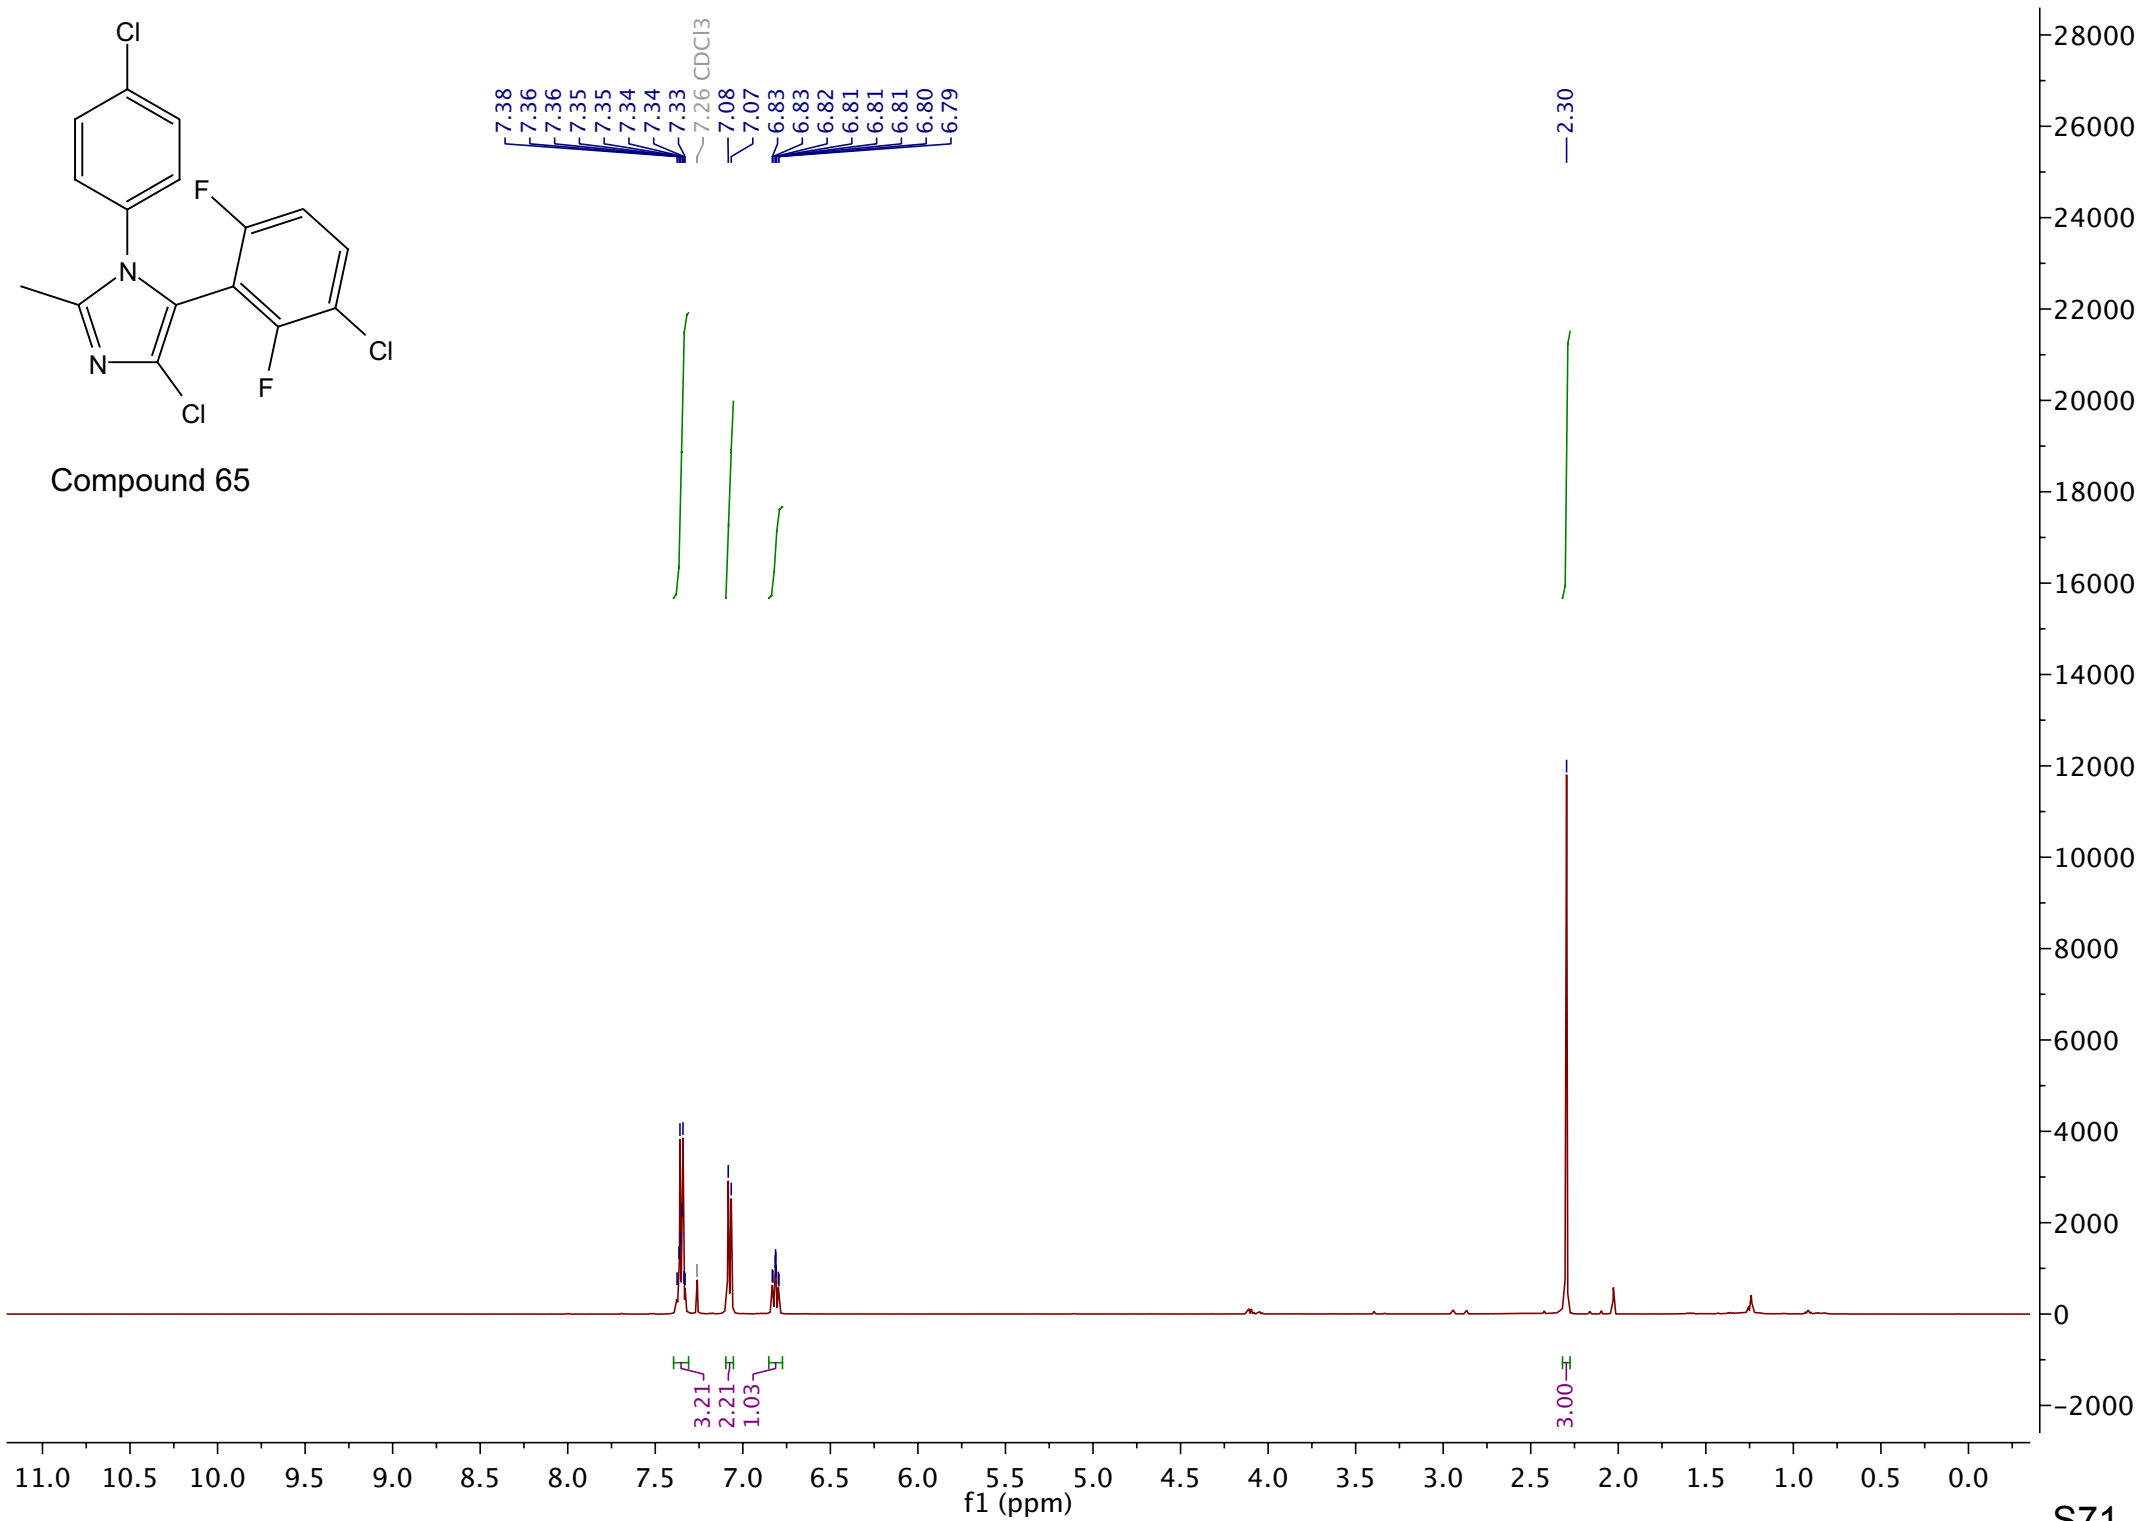

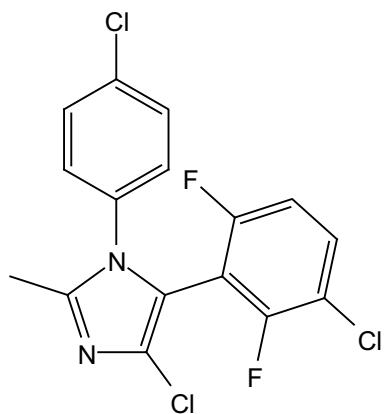

Compound 65

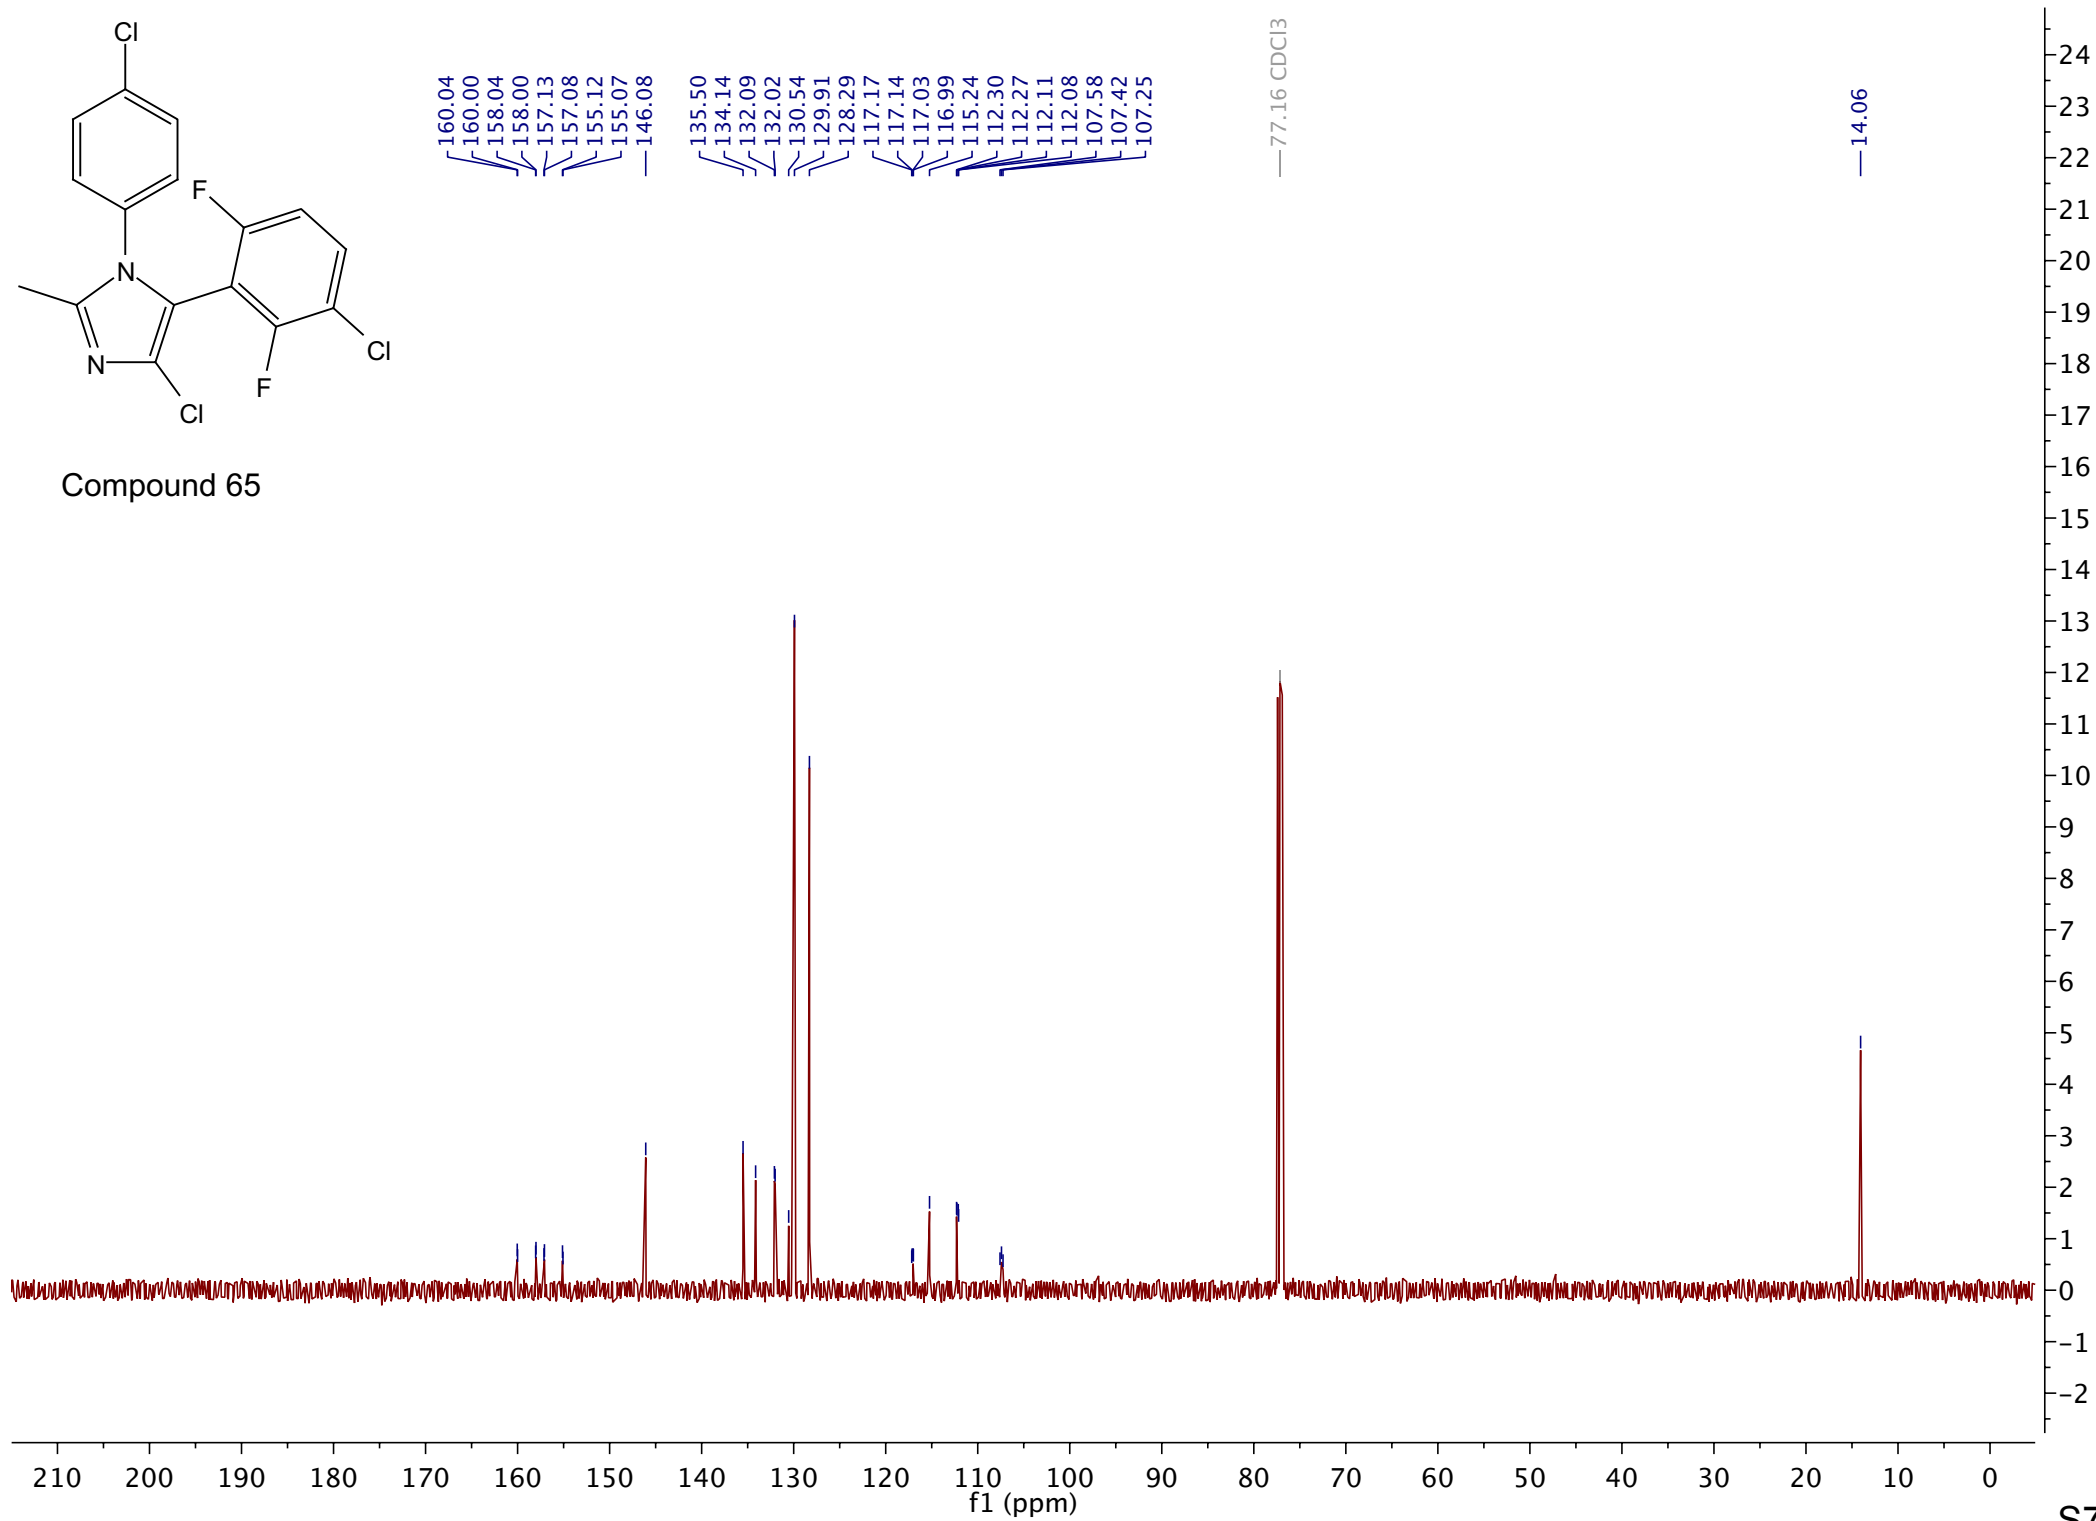



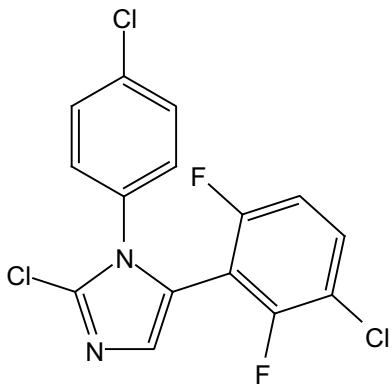

Compound 66

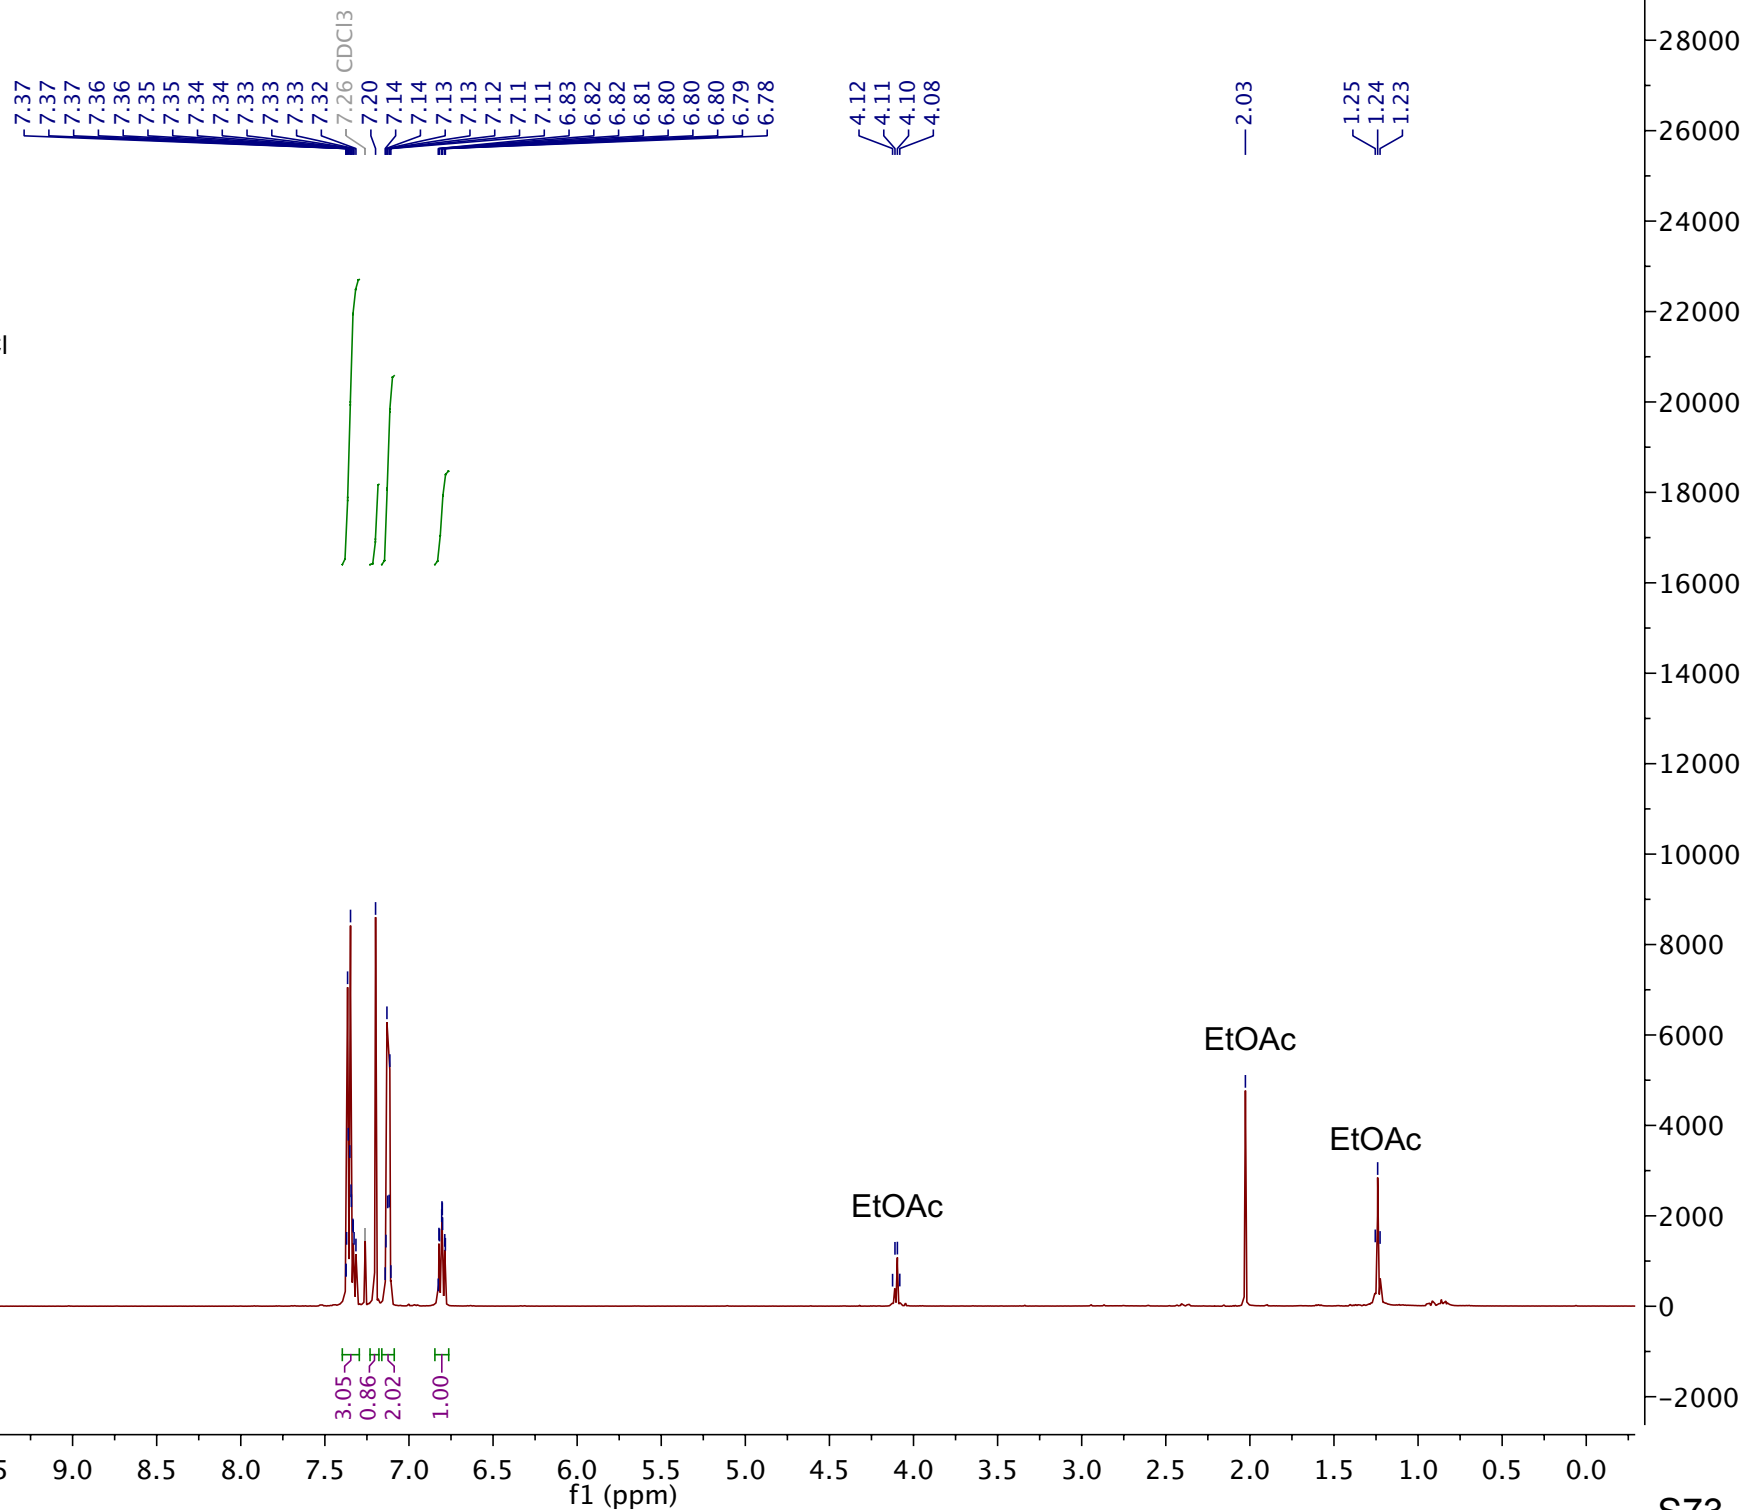

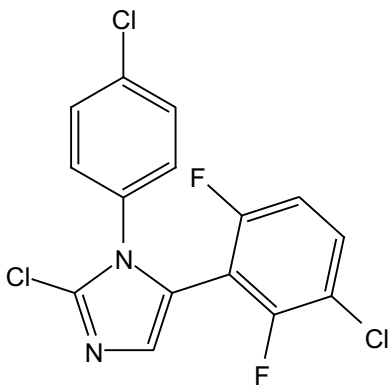

Compound 66

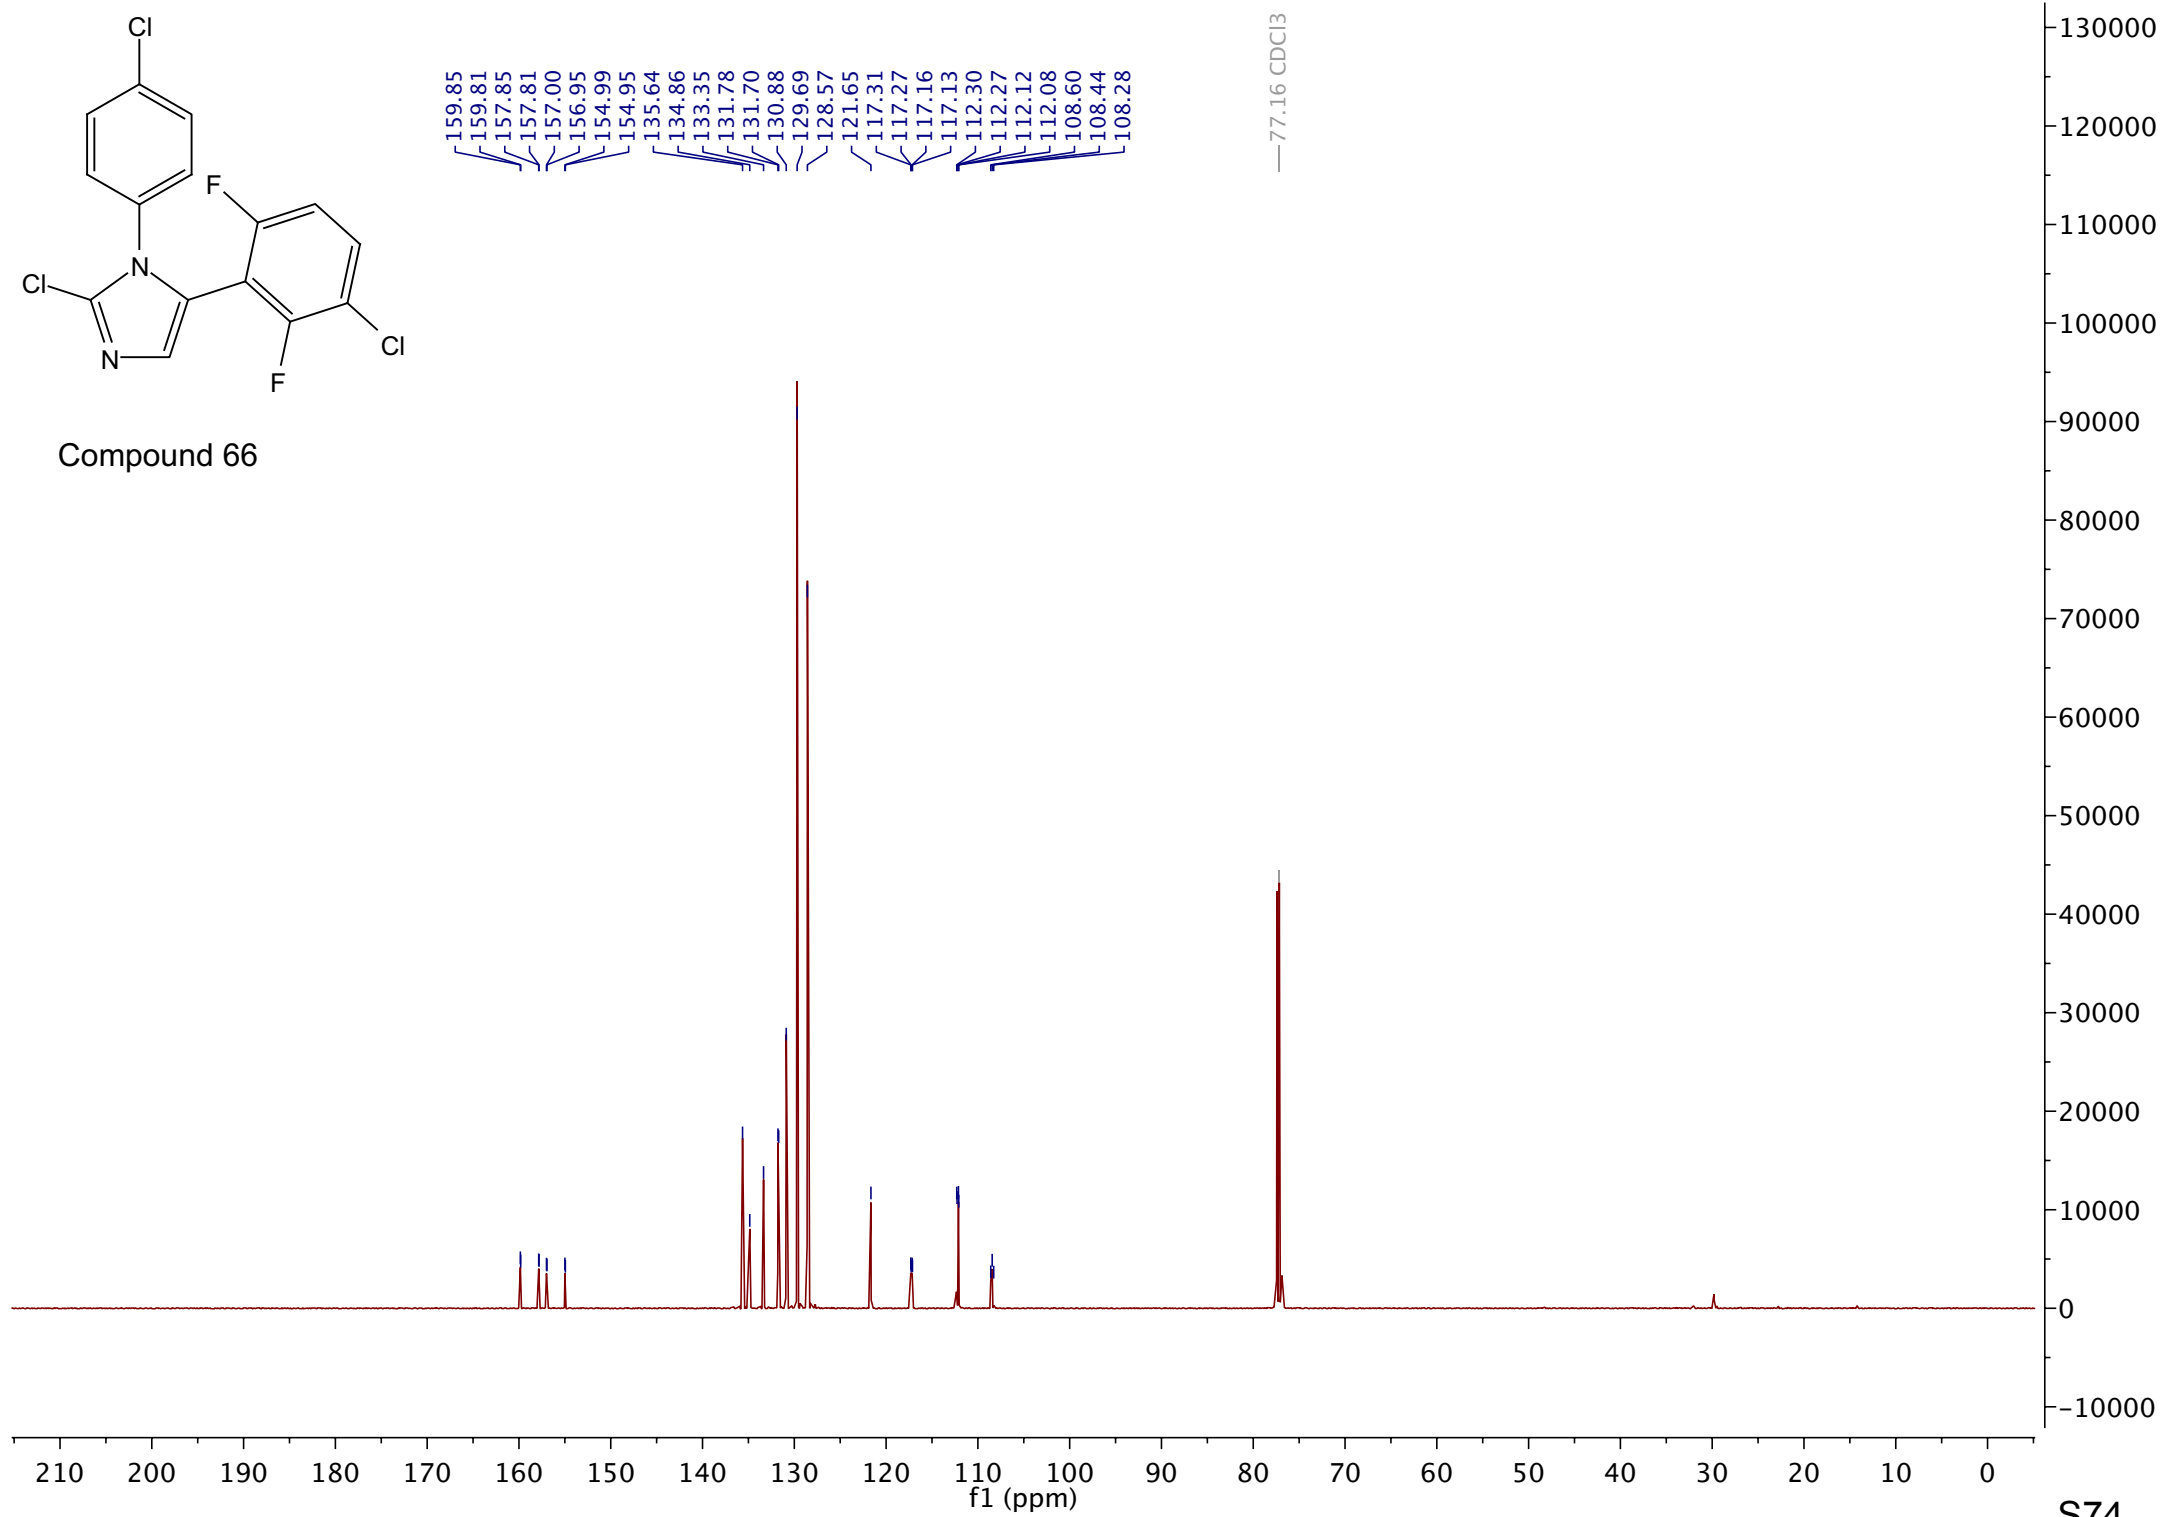

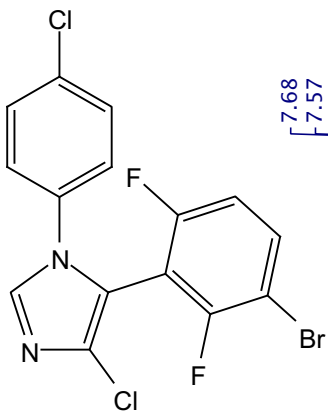

Compound 67

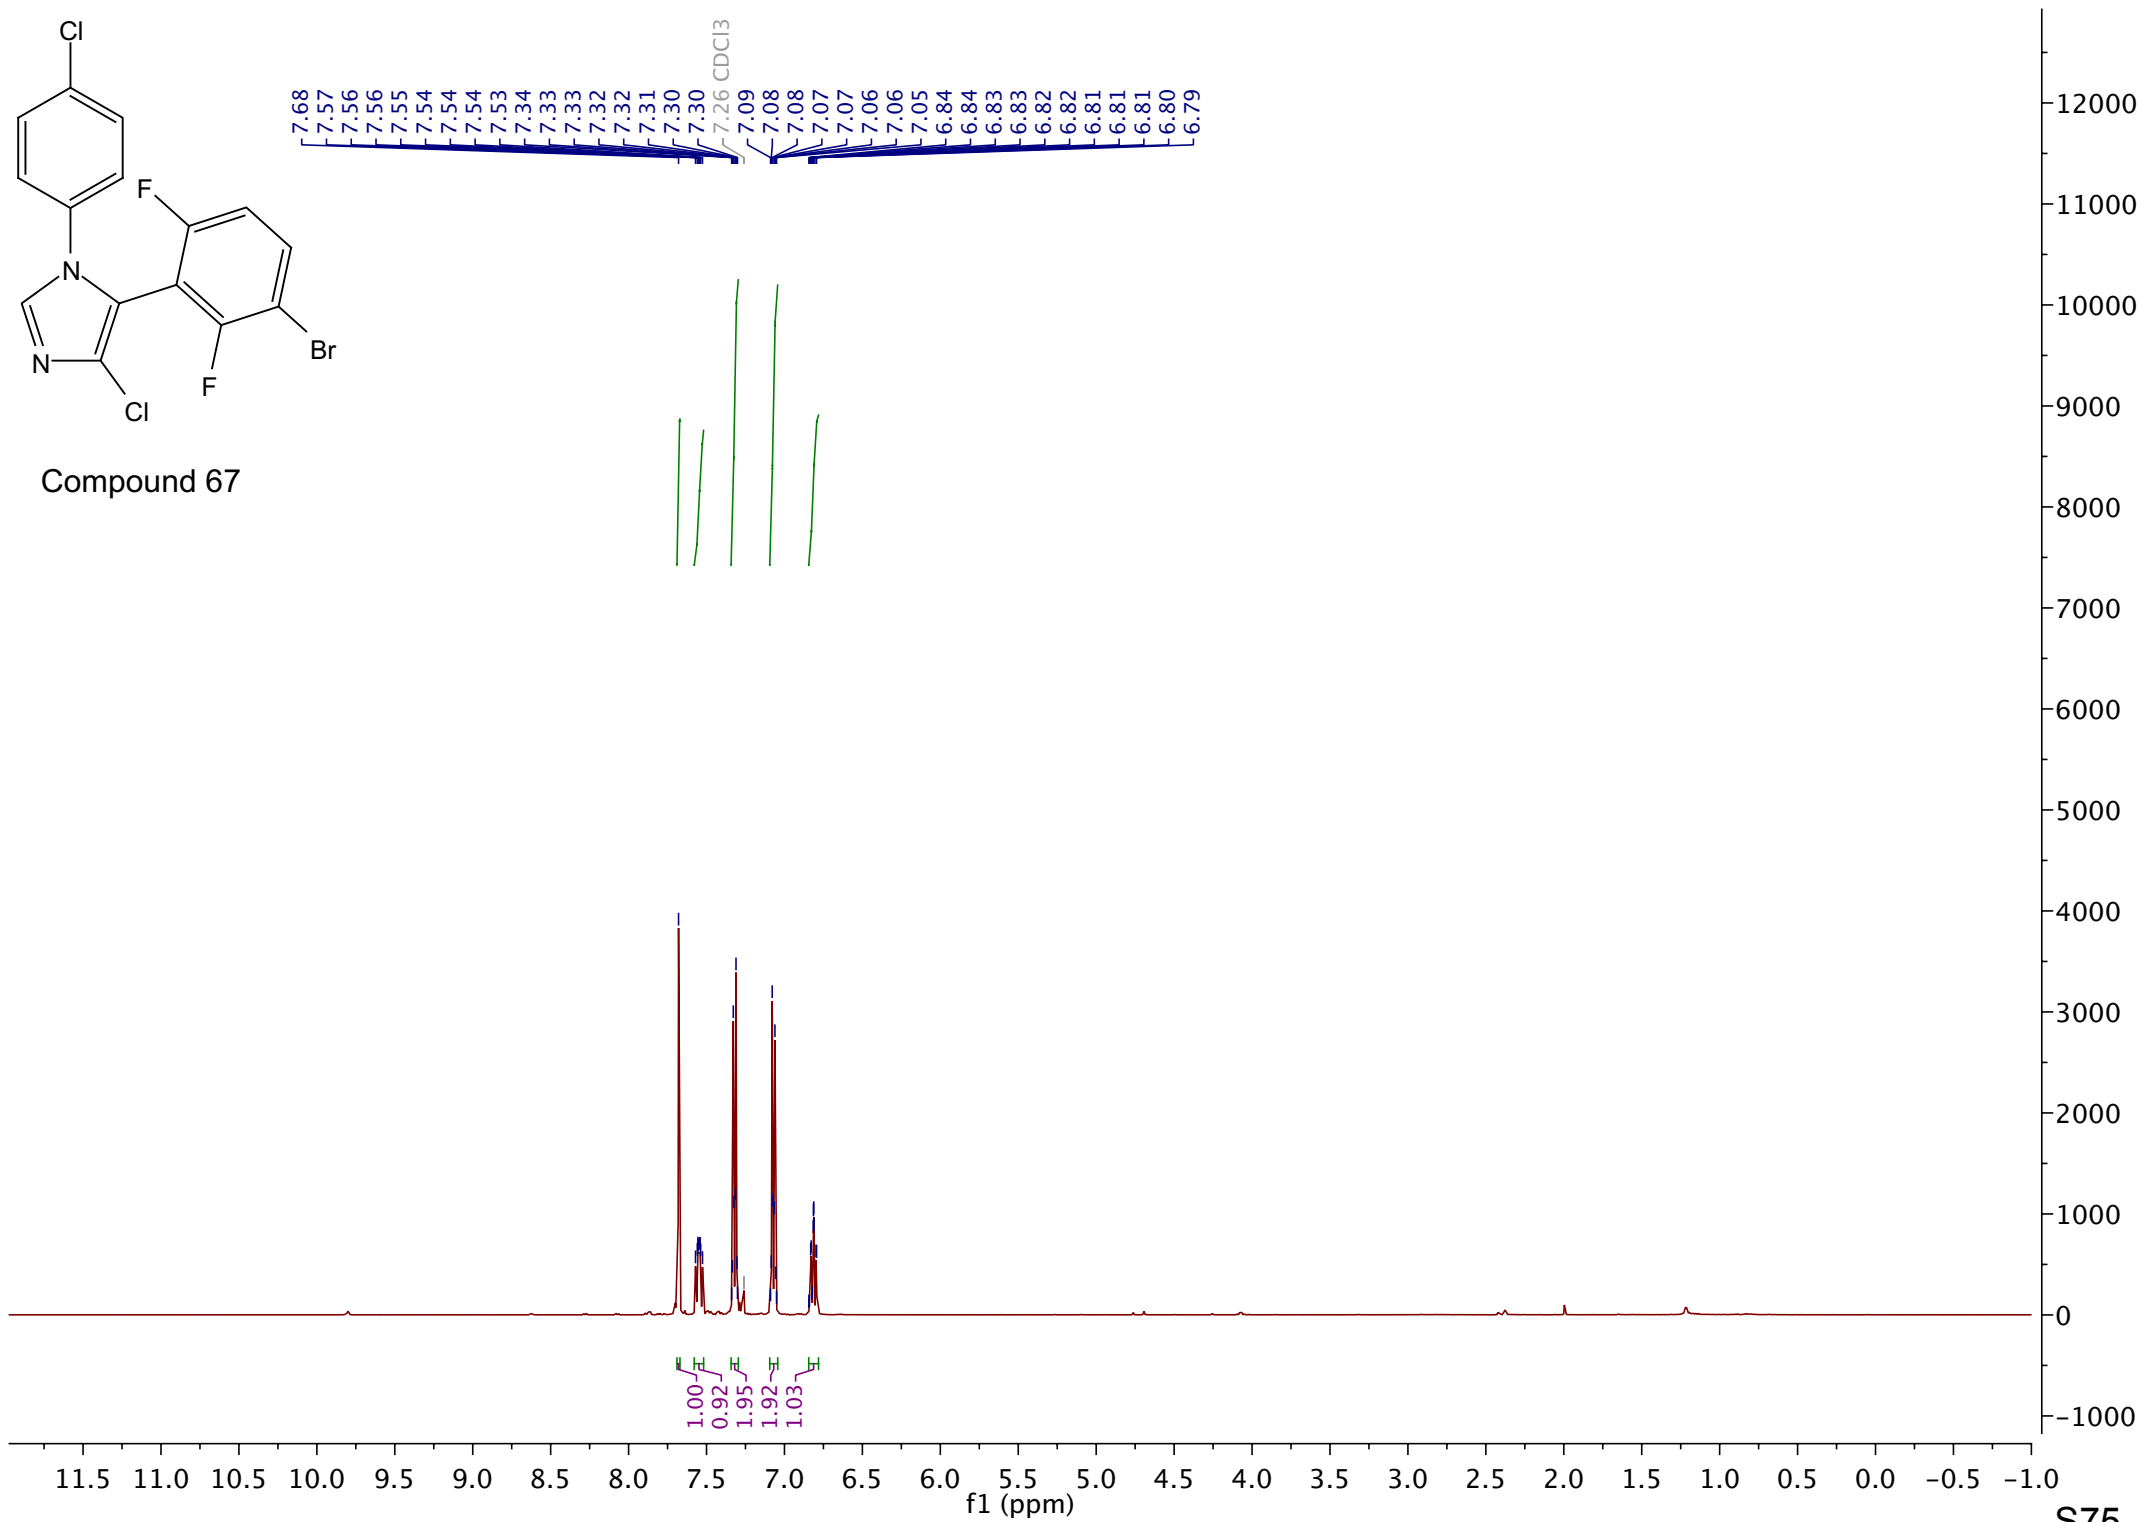

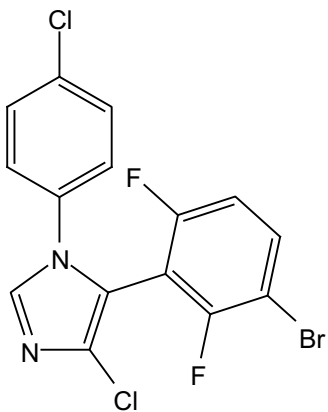

Compound 67

160.53  
160.50  
158.52  
158.49  
157.86  
157.81  
155.85  
155.81  
137.04  
135.14  
135.13  
135.07  
135.05  
135.01  
134.23  
132.59  
129.93  
125.81  
115.25  
113.00  
112.97  
112.82  
112.78  
106.86  
106.70  
106.53  
104.54  
104.51  
104.37  
104.34

—77.16 CDCl<sub>3</sub>

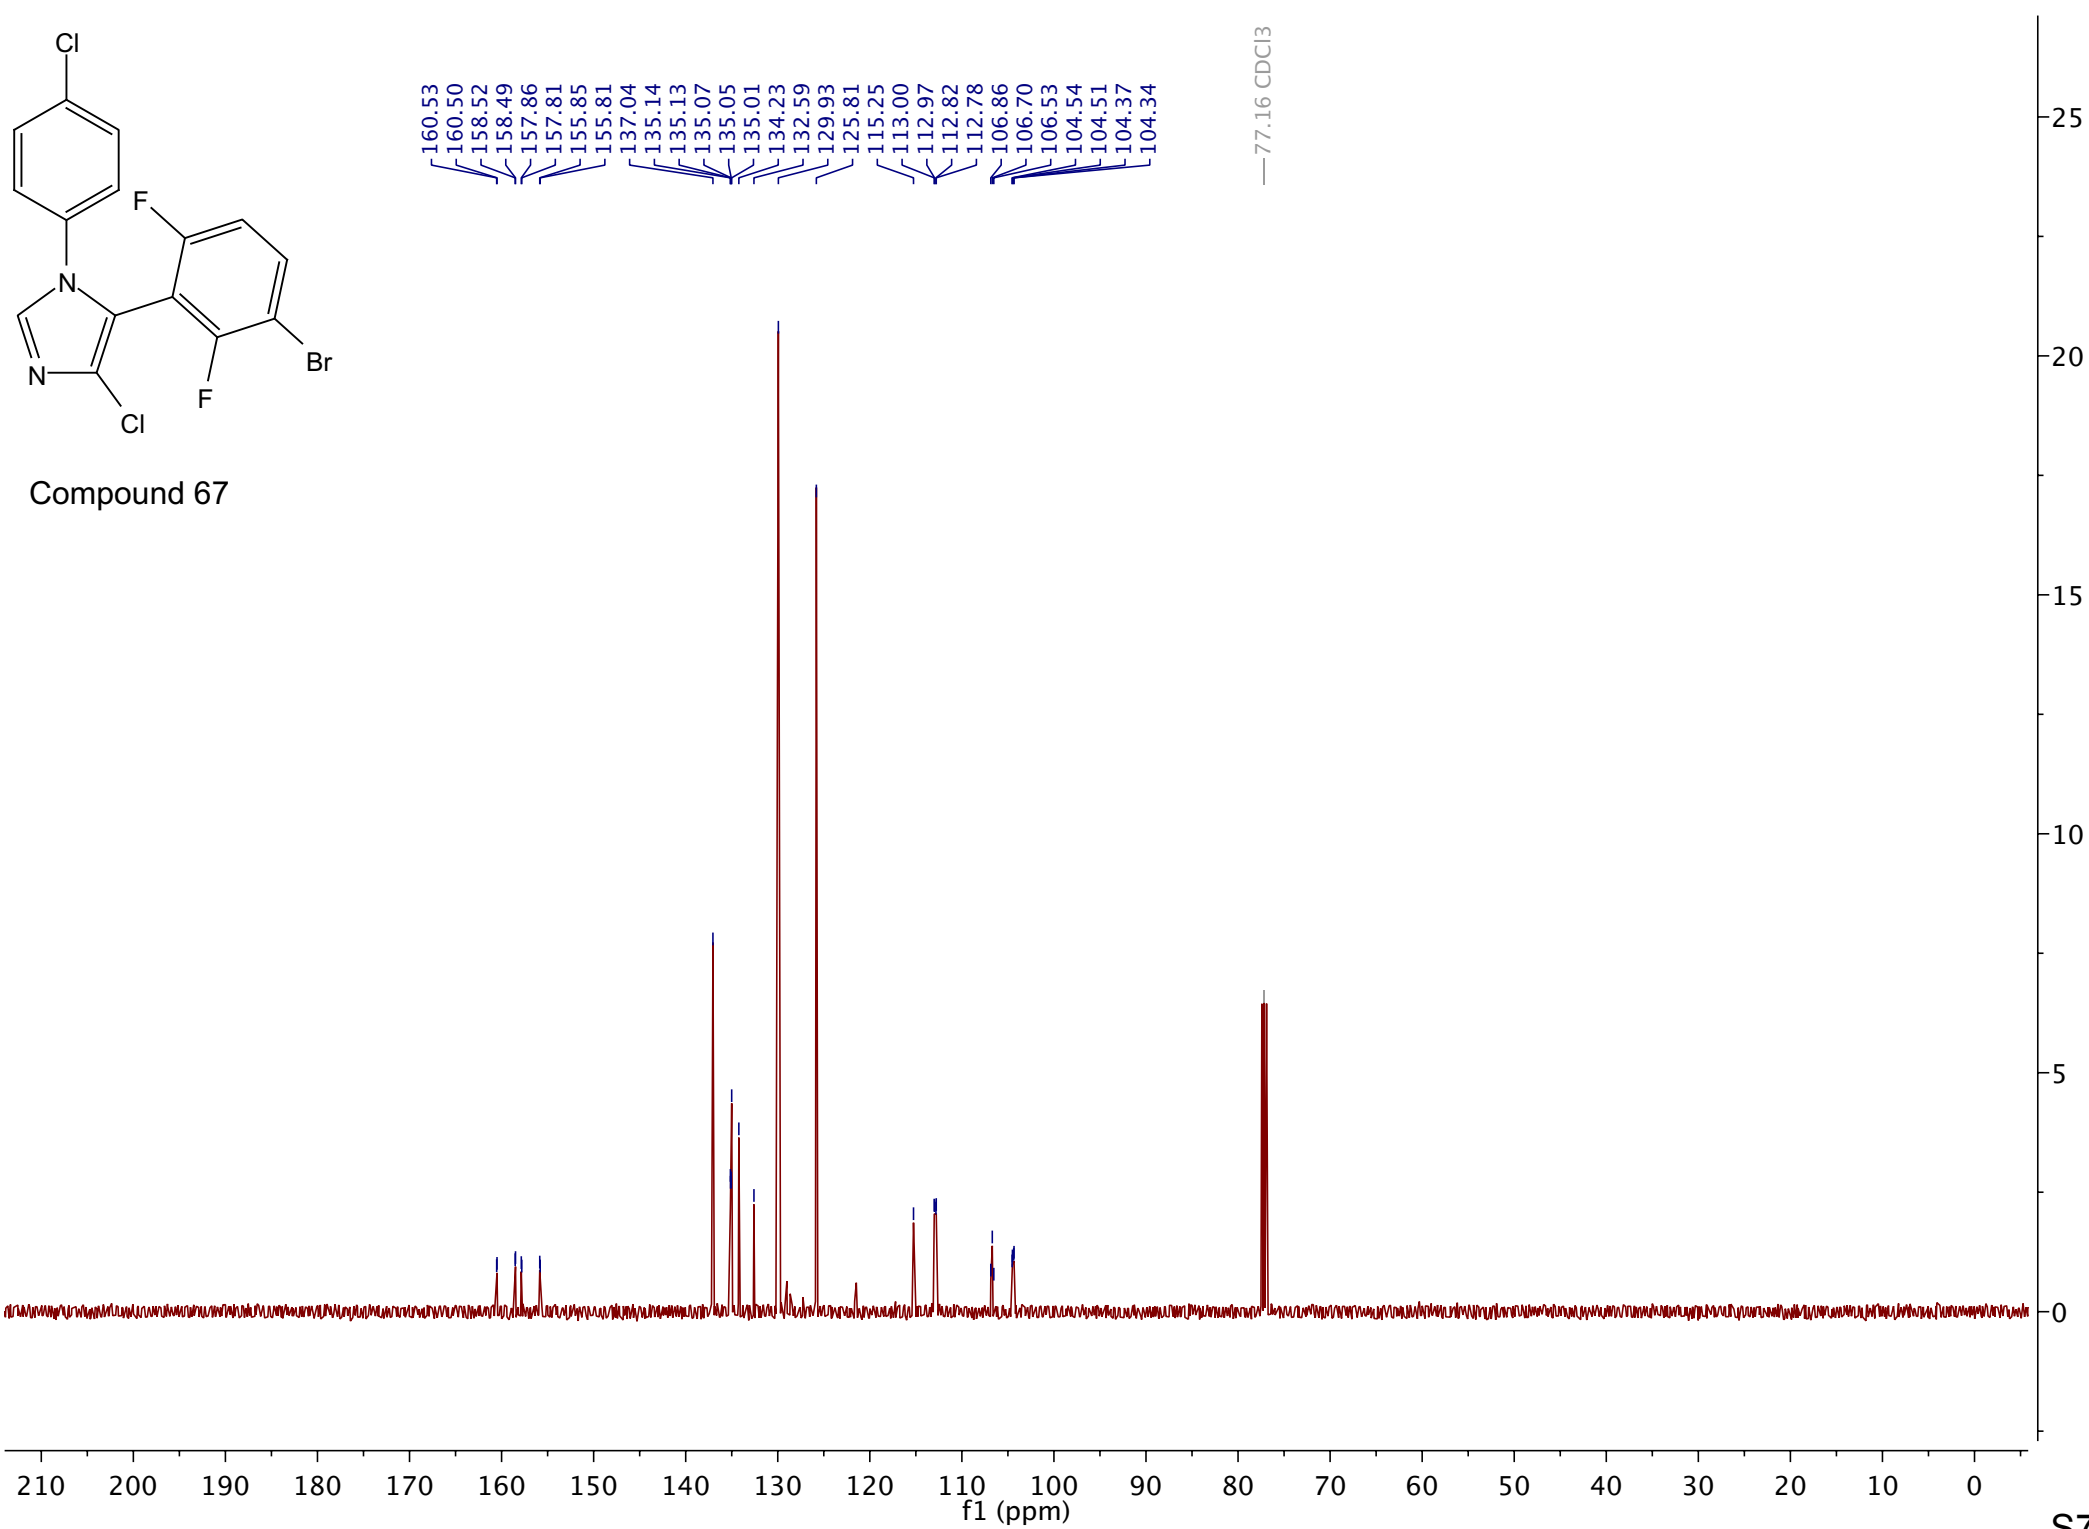

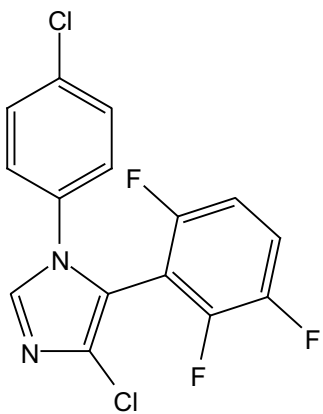

Compound 68

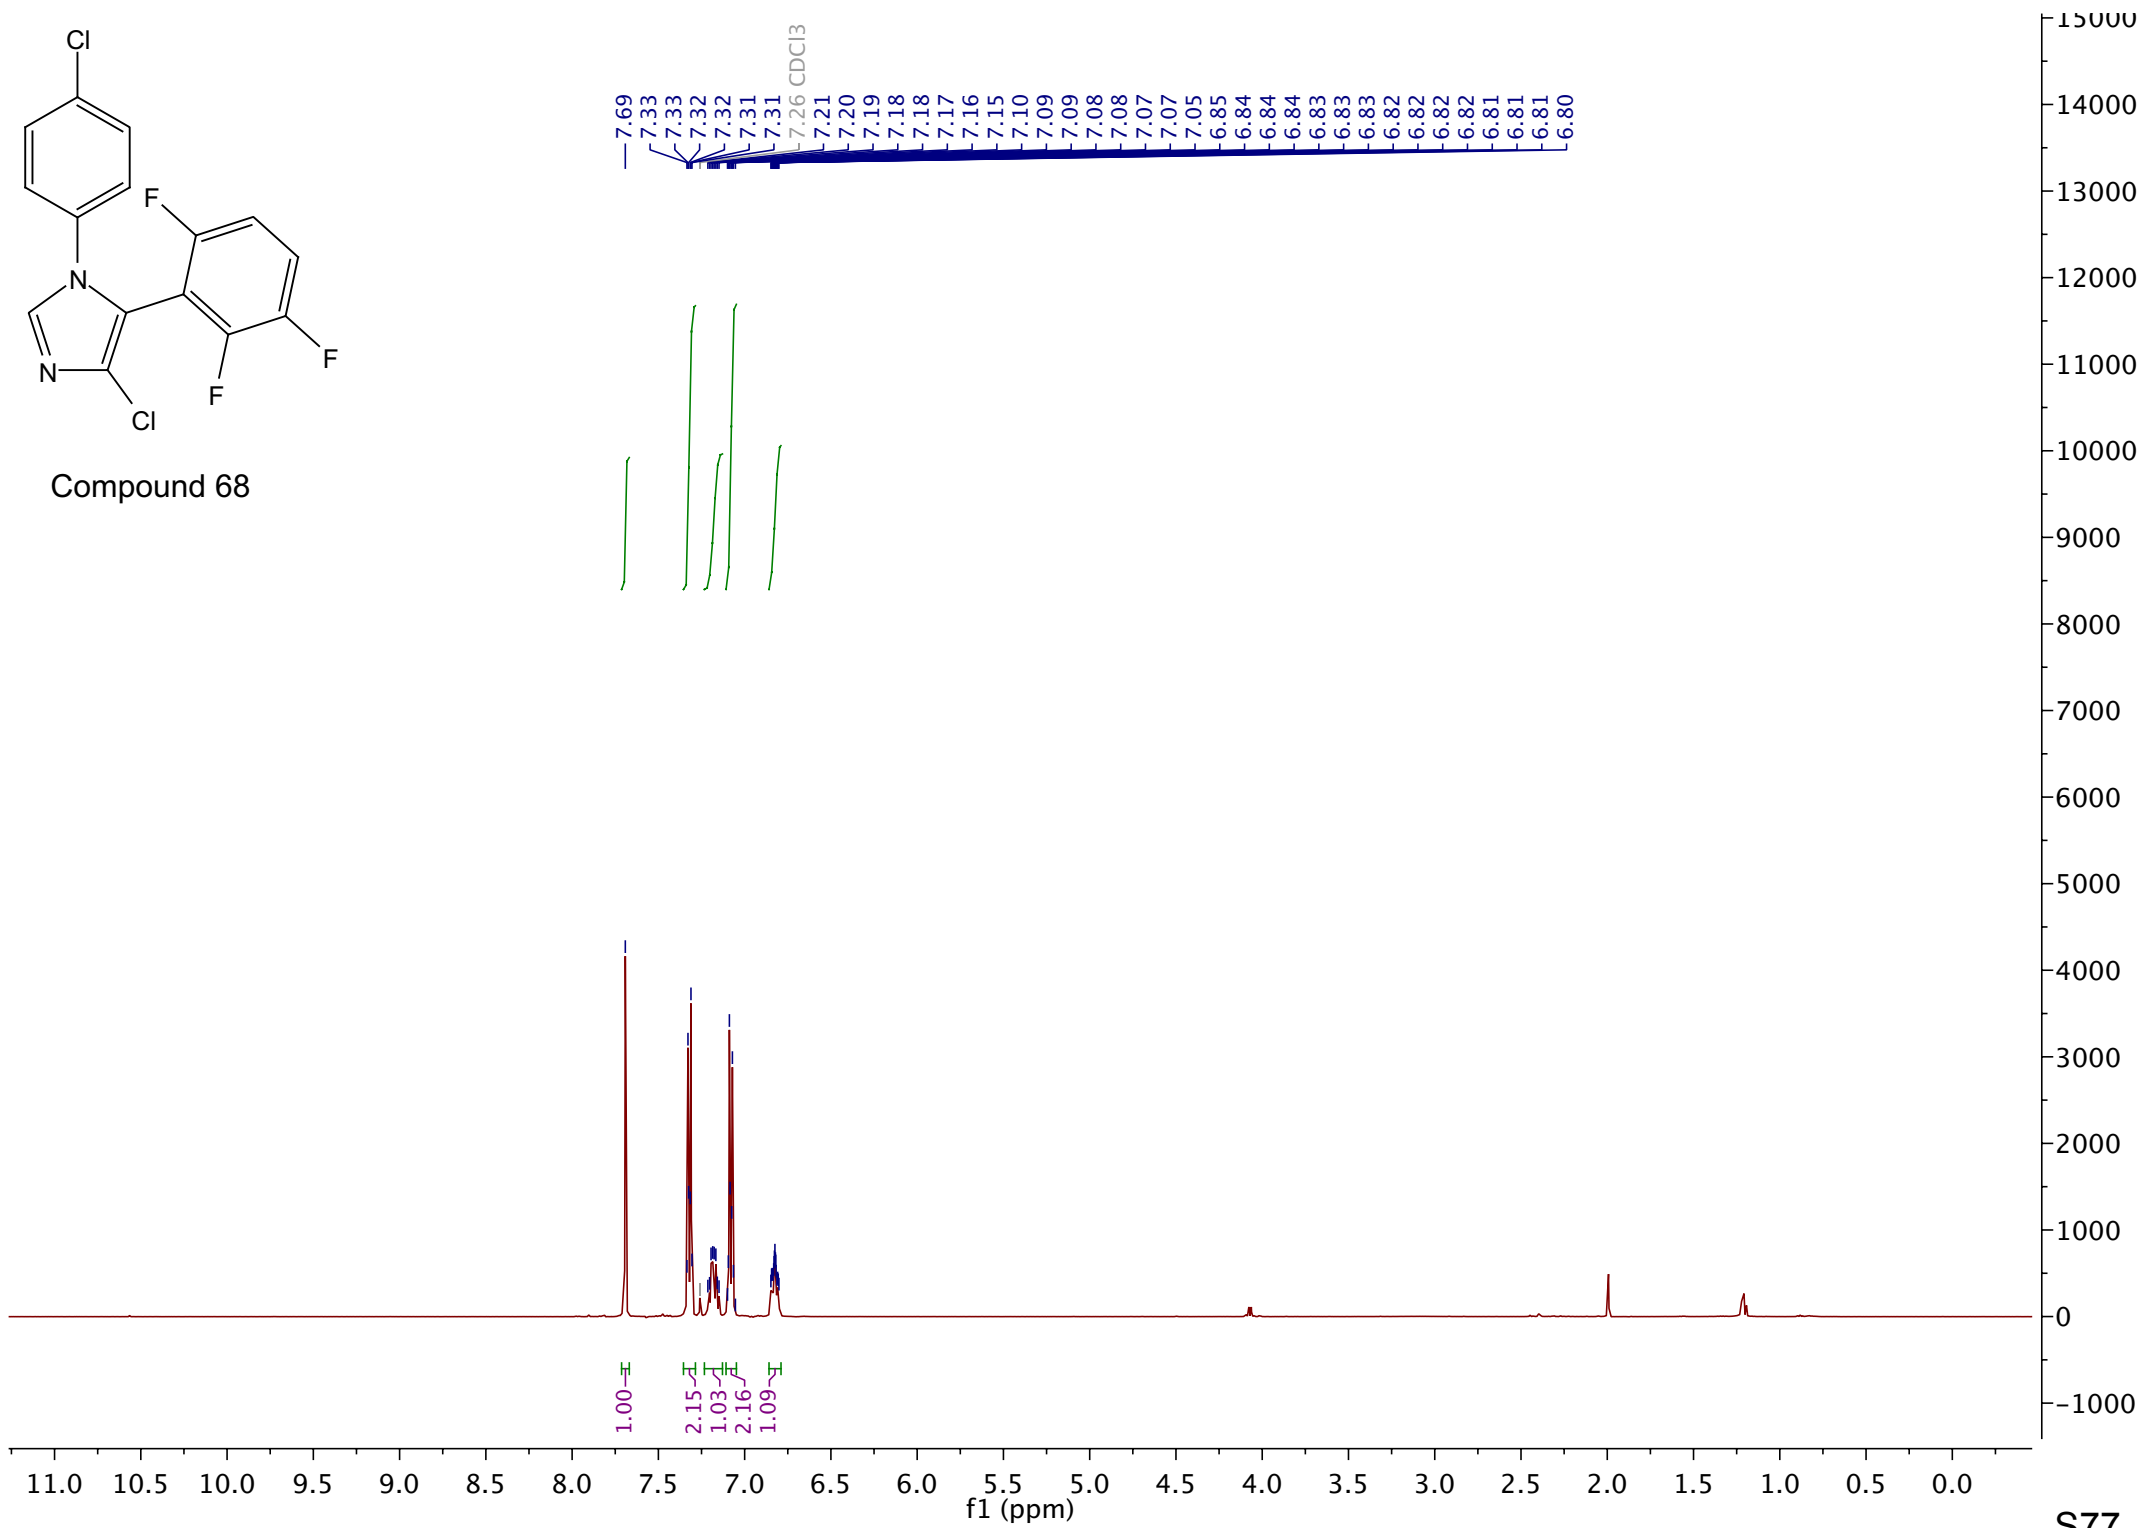

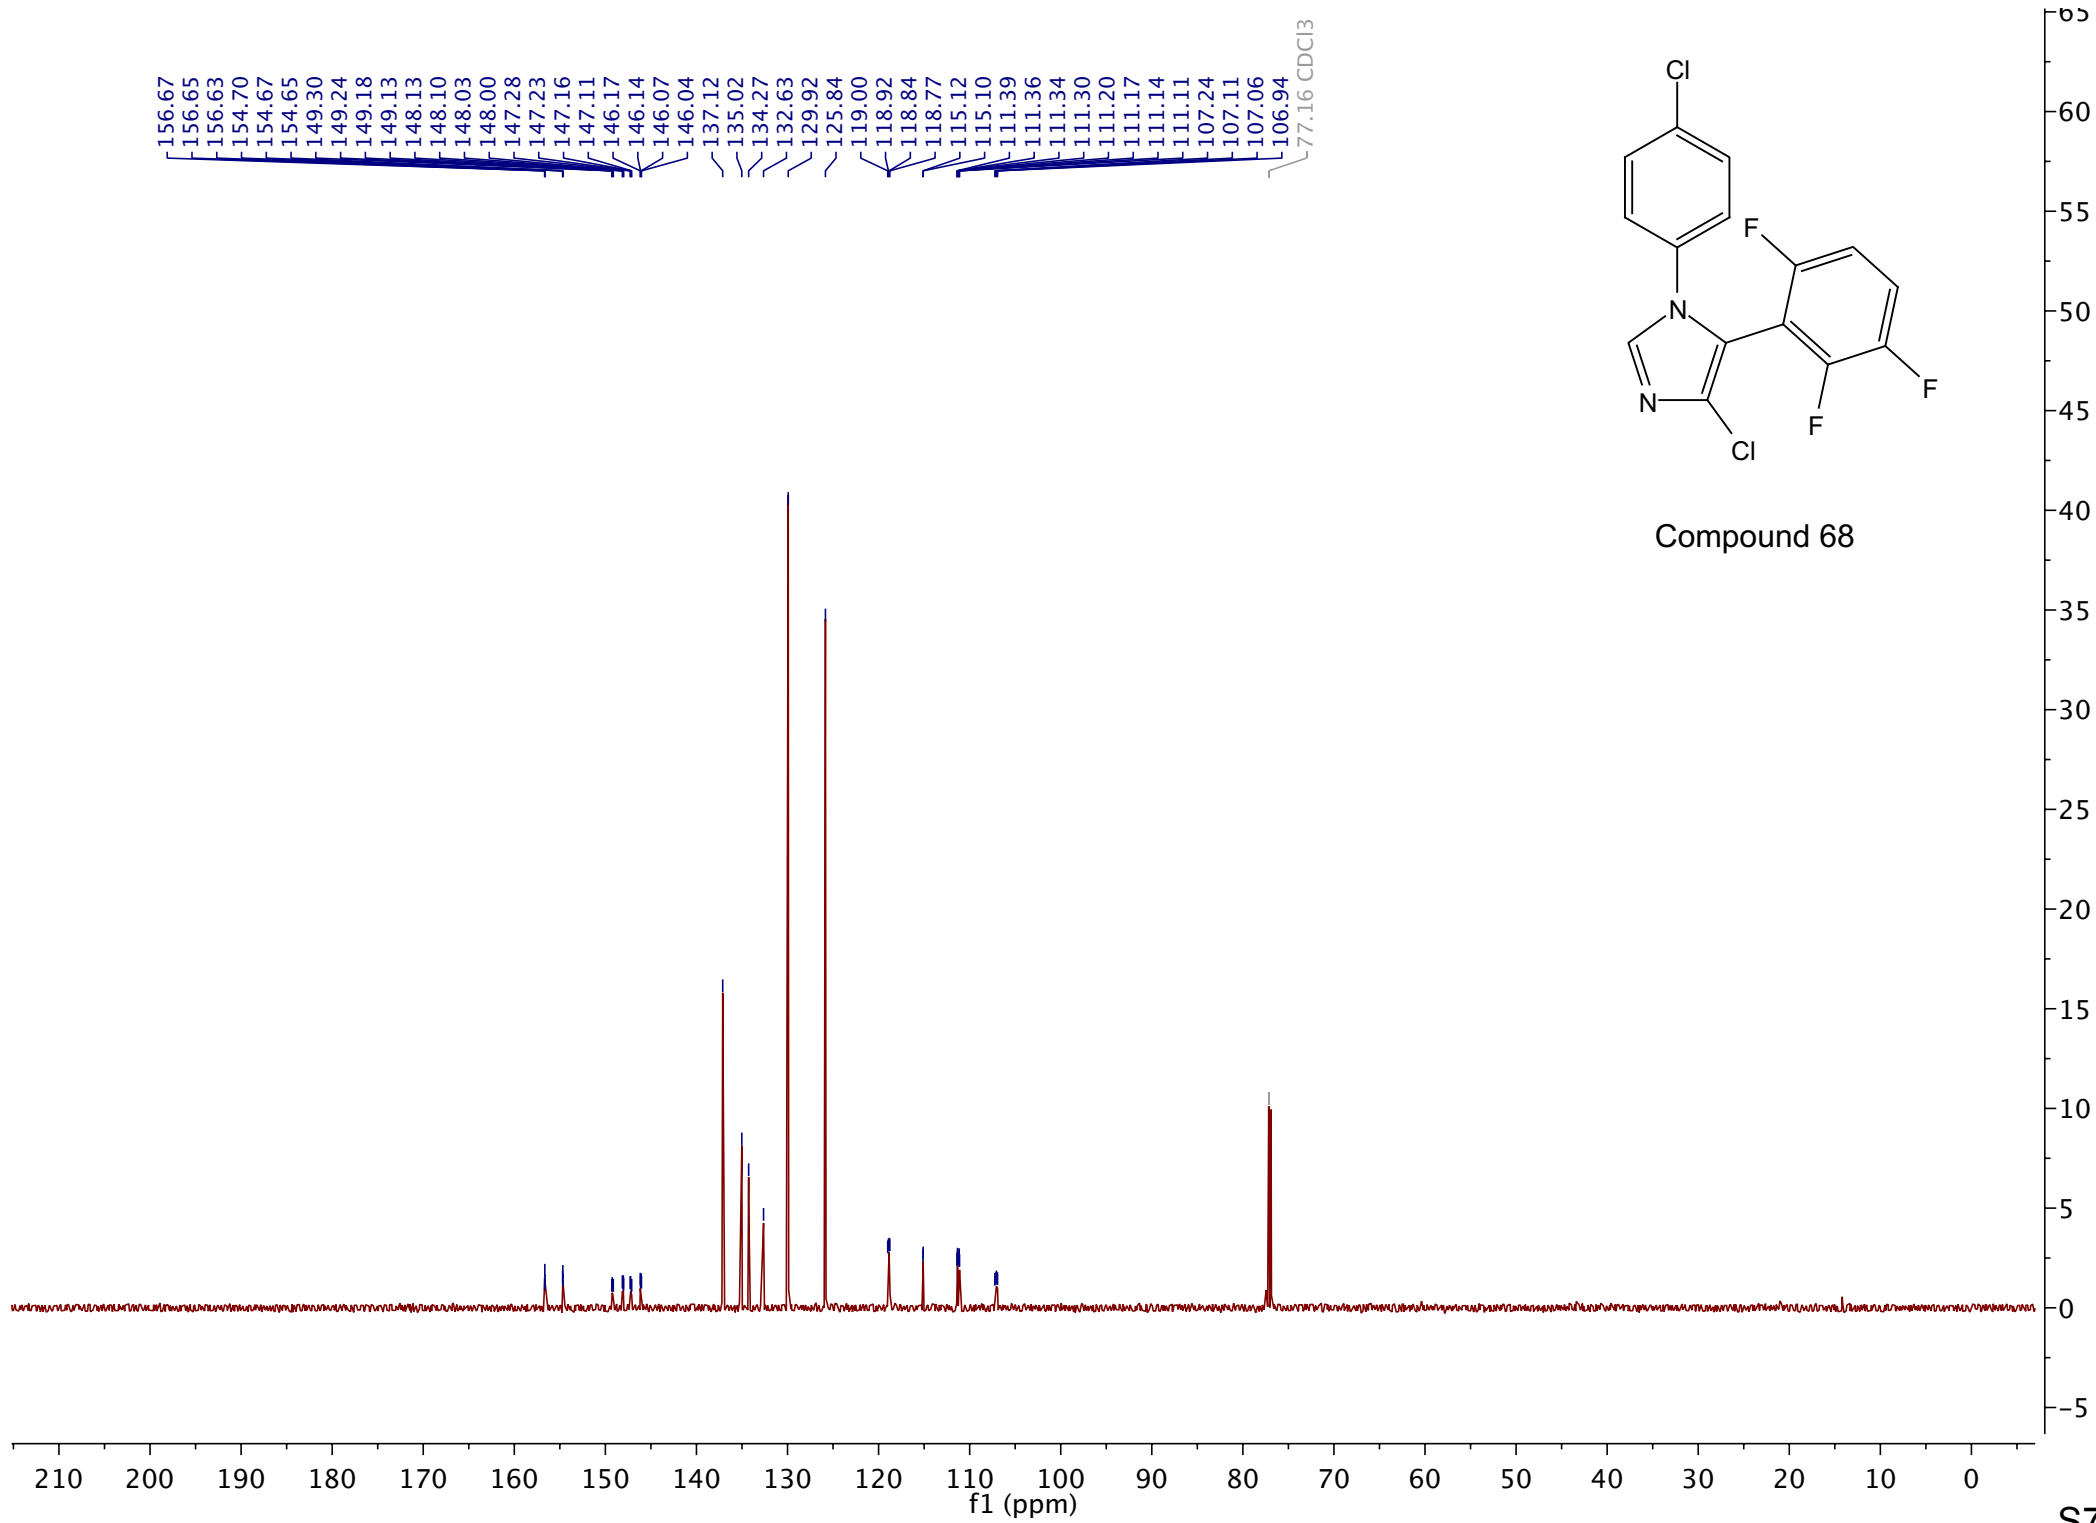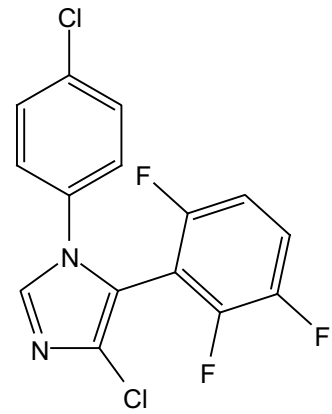

Compound 68

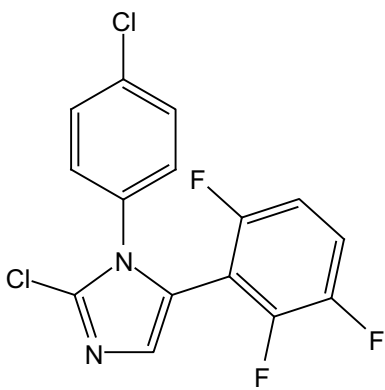

Compound 69

7.37  
7.36  
7.26 CDCl3  
7.22  
7.16  
7.15  
7.14  
7.13  
7.12  
7.11  
7.10  
7.09  
7.08  
6.81  
6.81  
6.80  
6.80  
6.79  
6.79  
6.79  
6.79  
6.78  
6.78  
6.77  
6.77  
6.77  
6.76

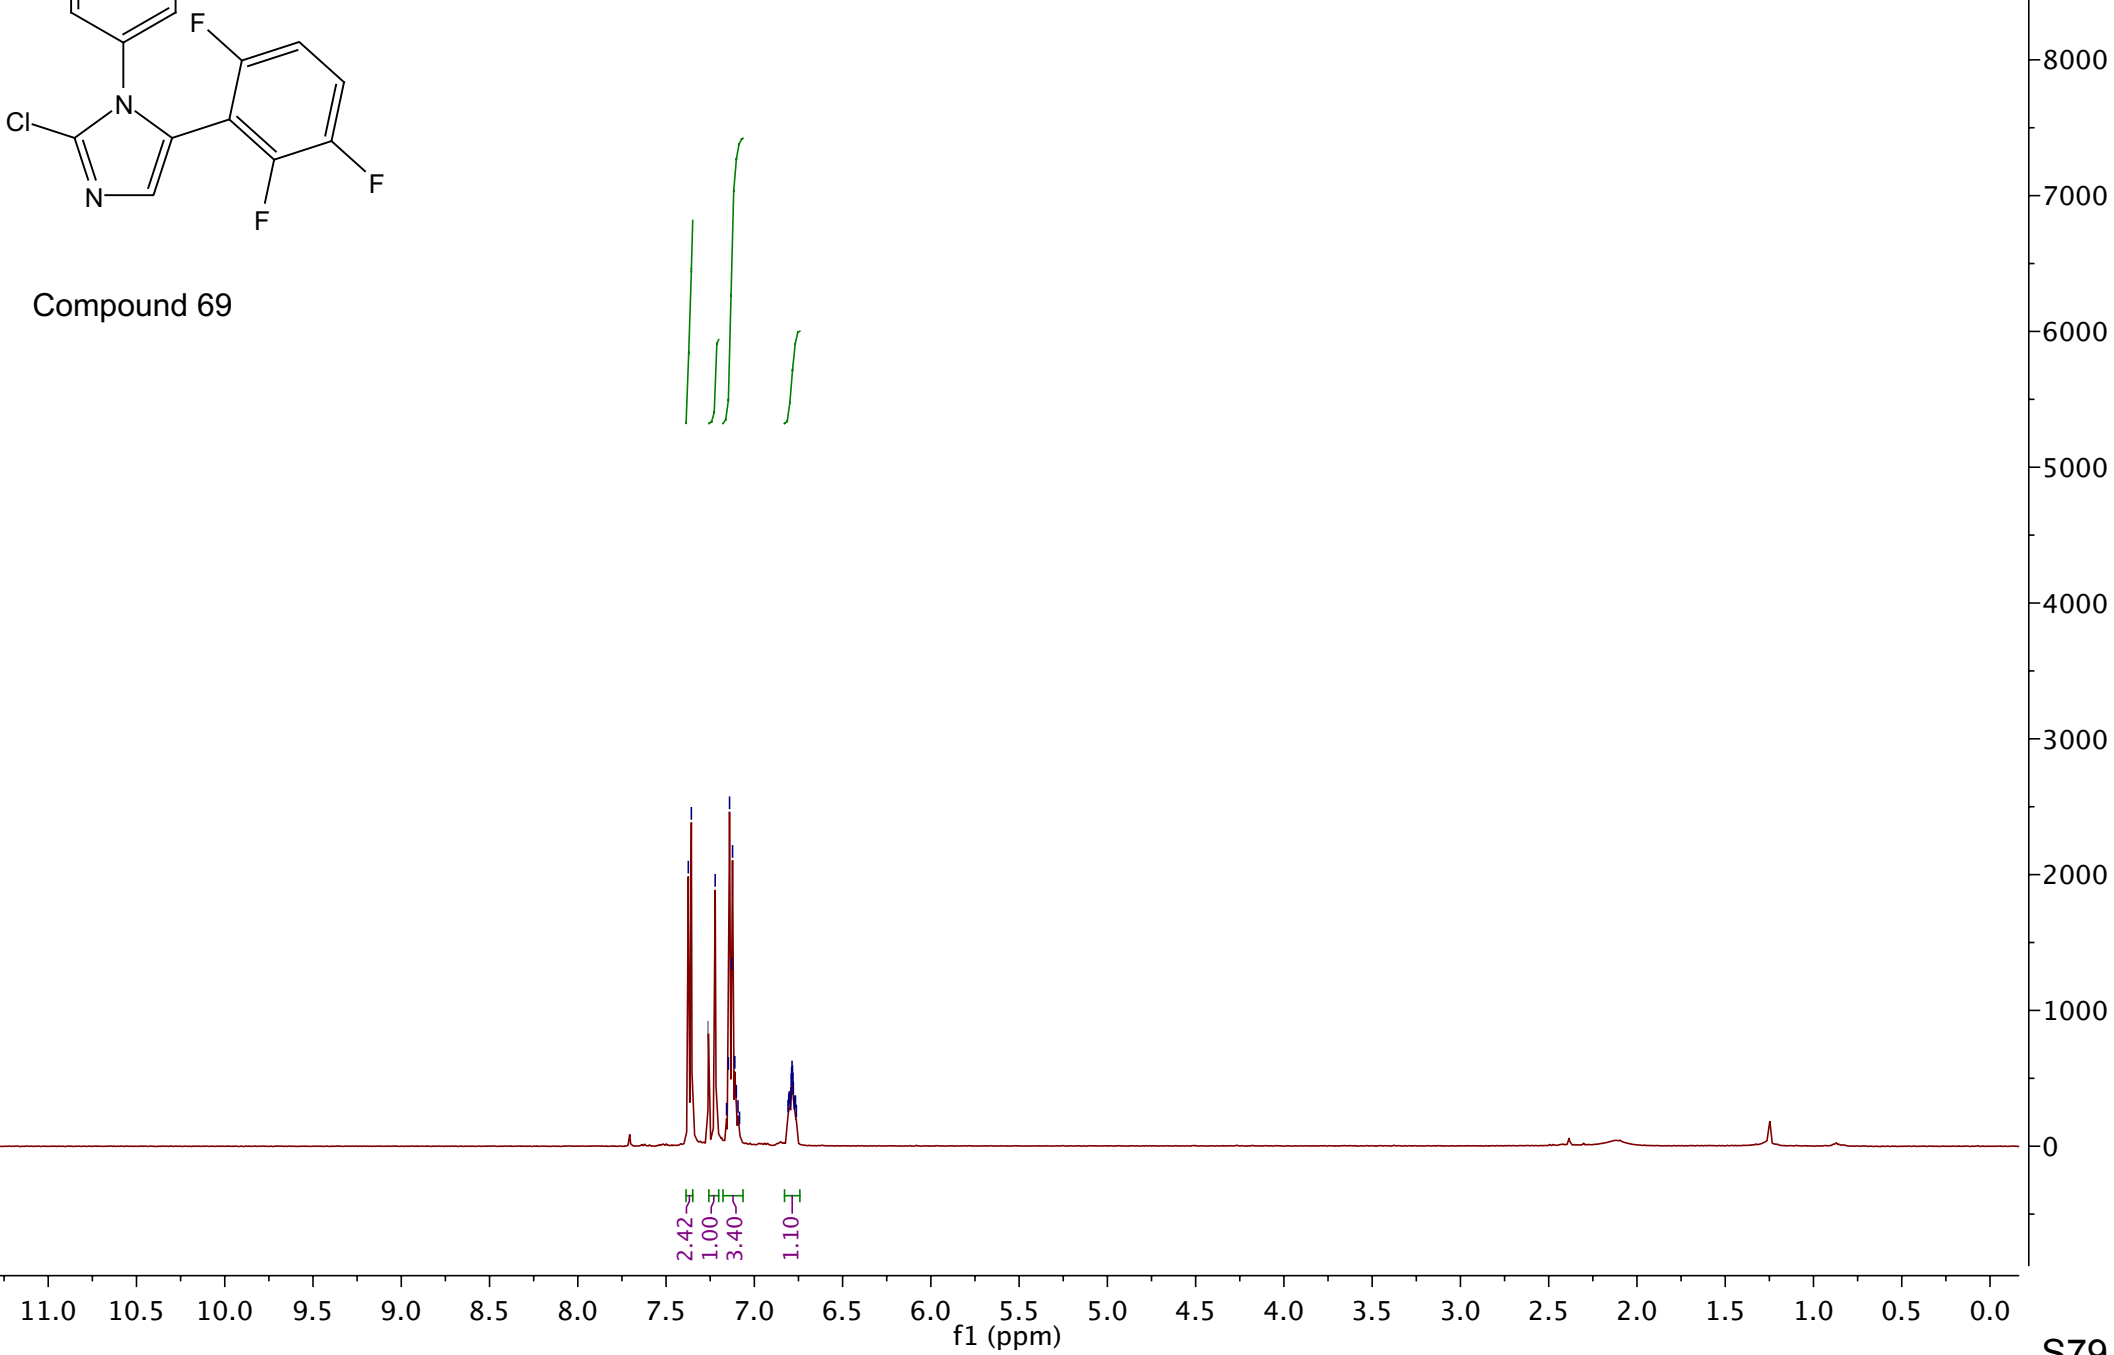

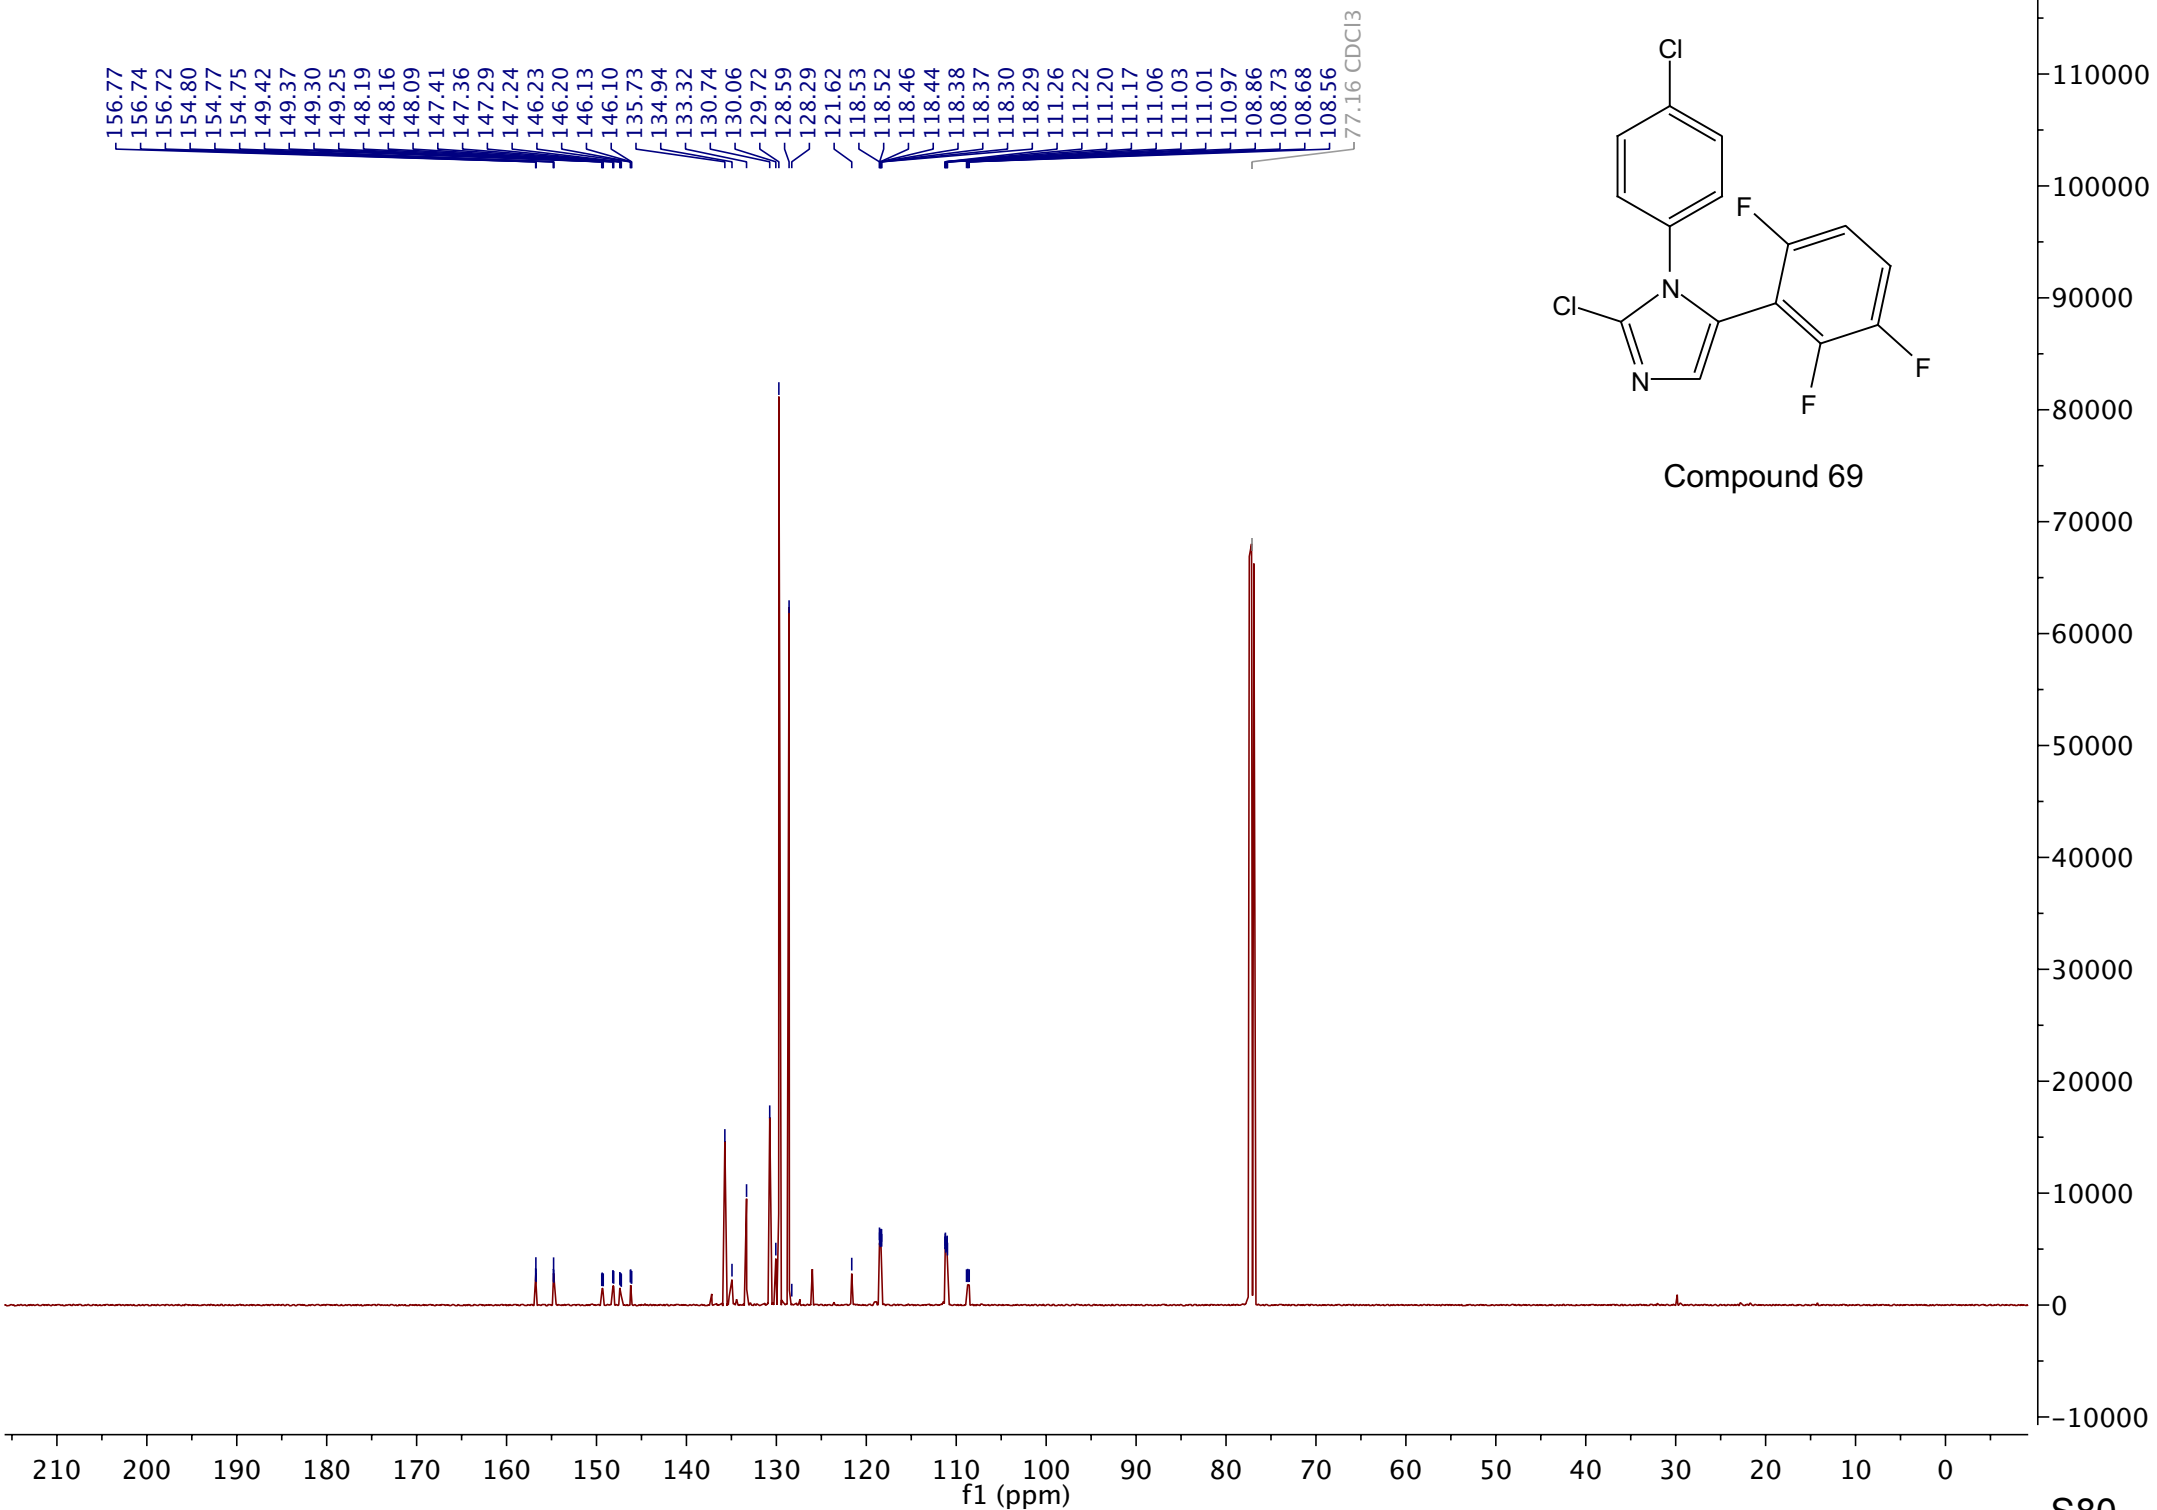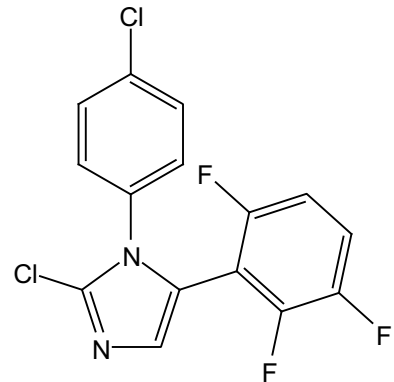

Compound 69



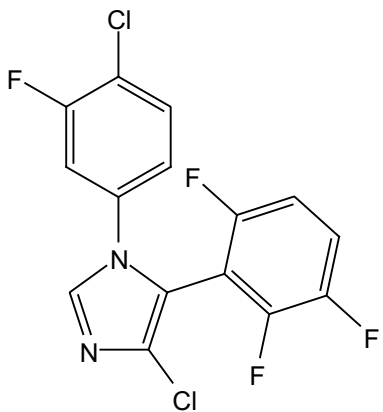

Compound 70

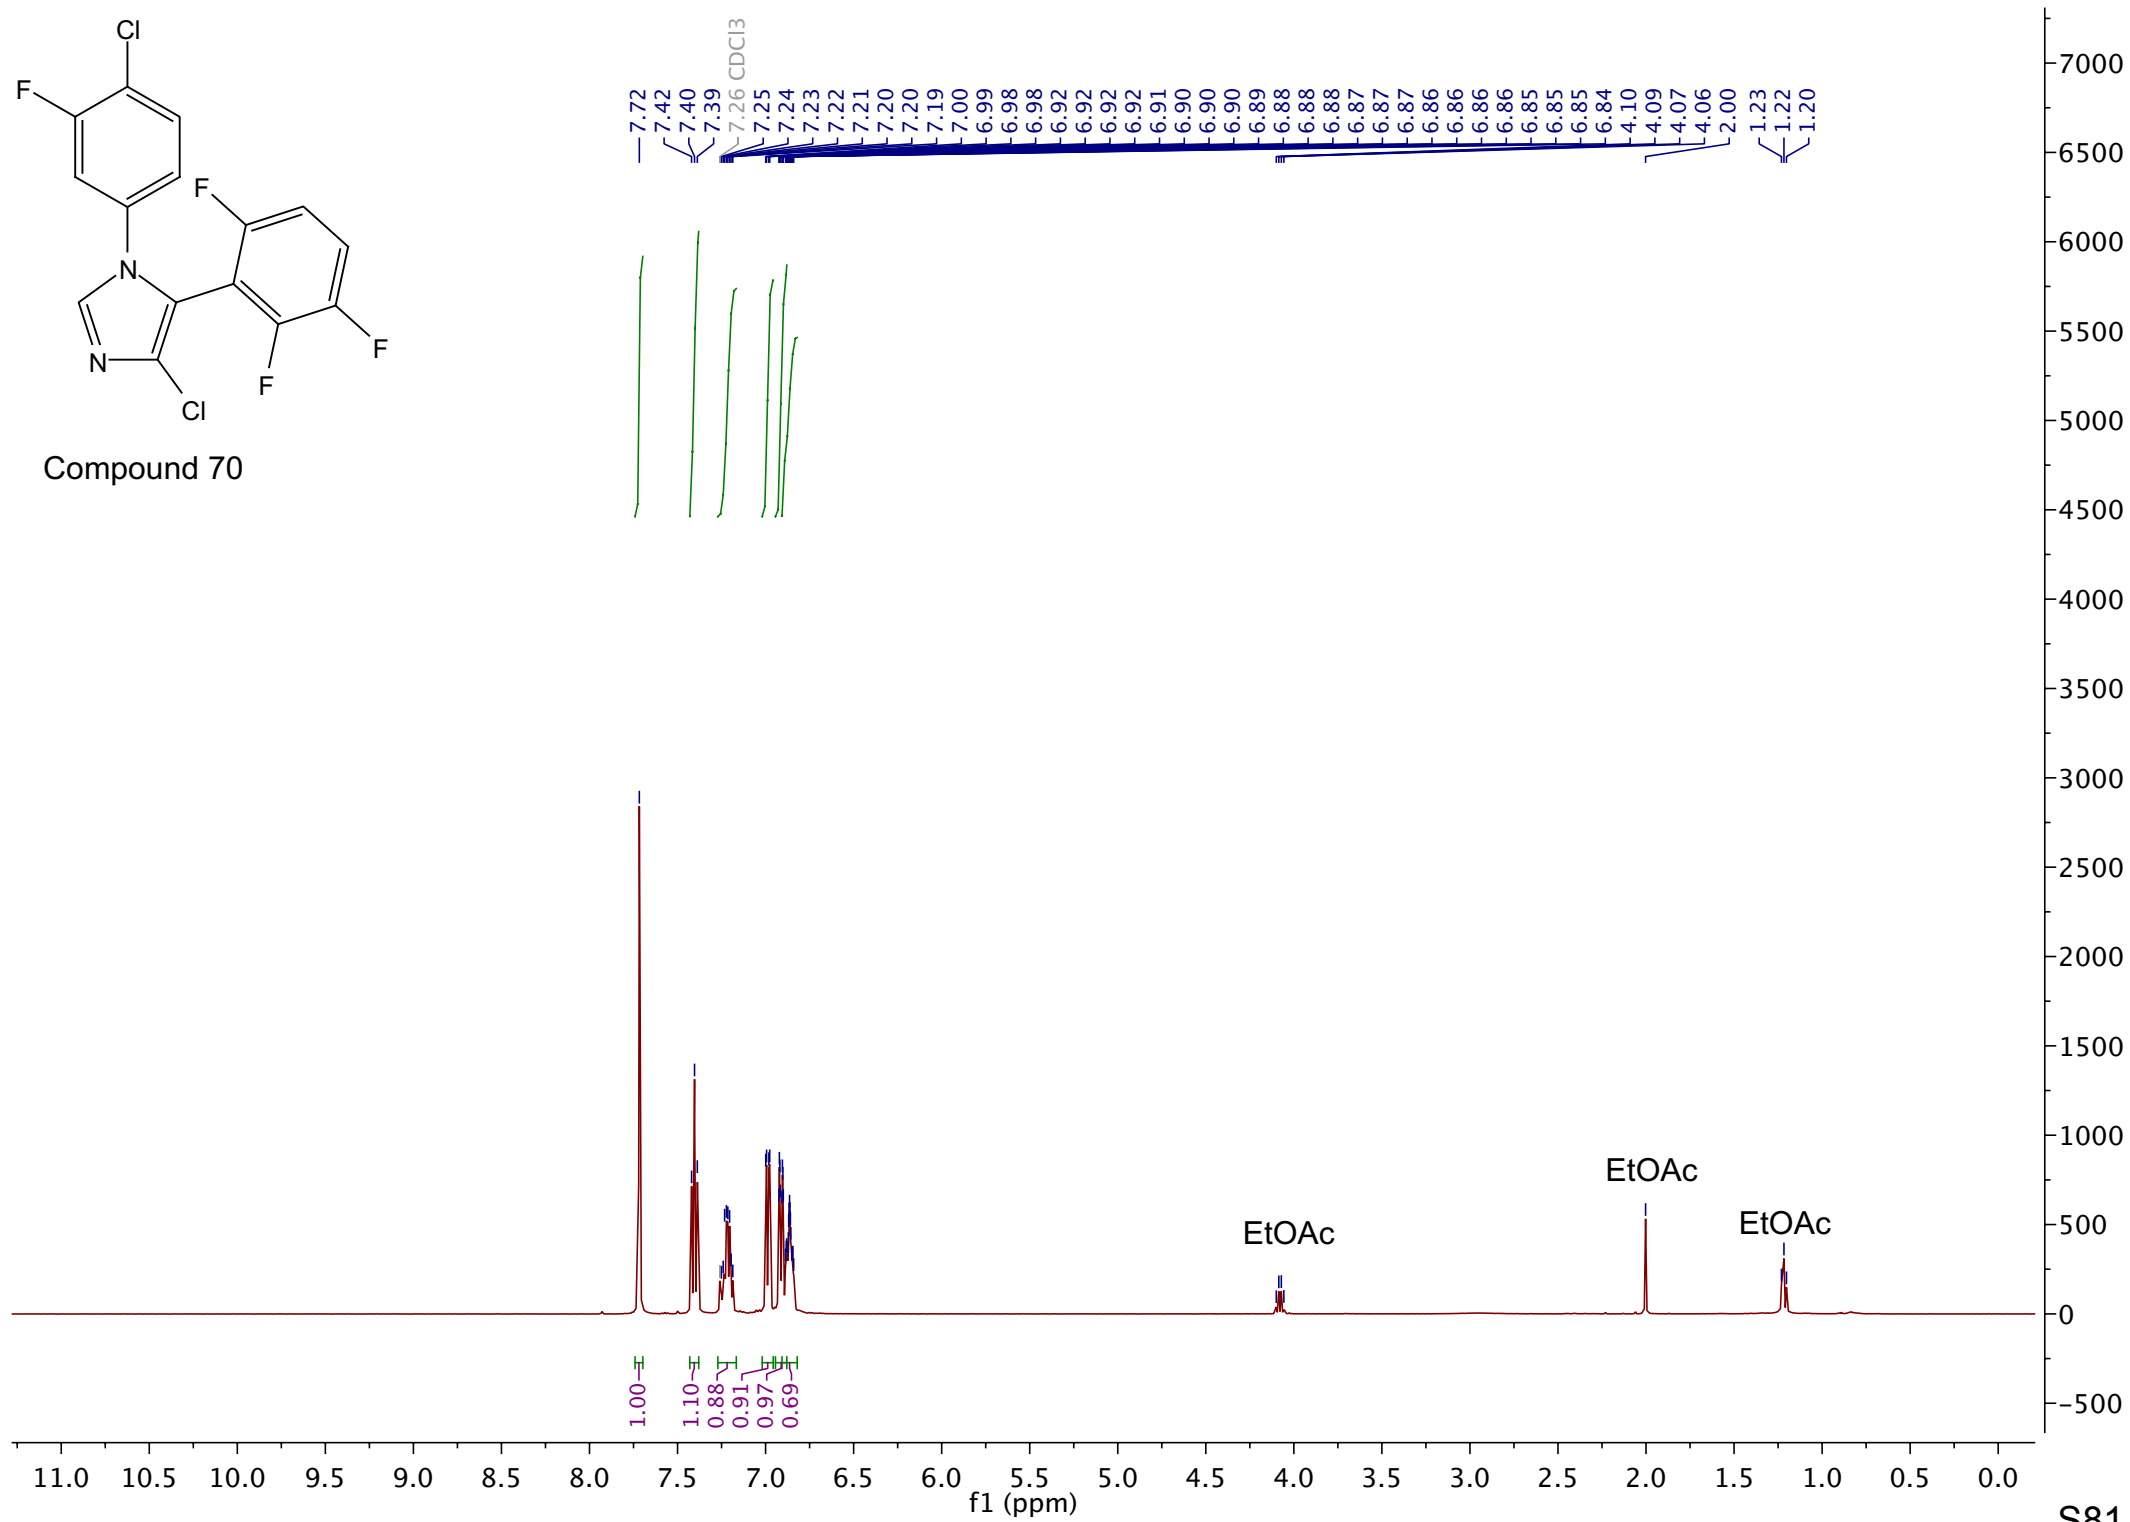

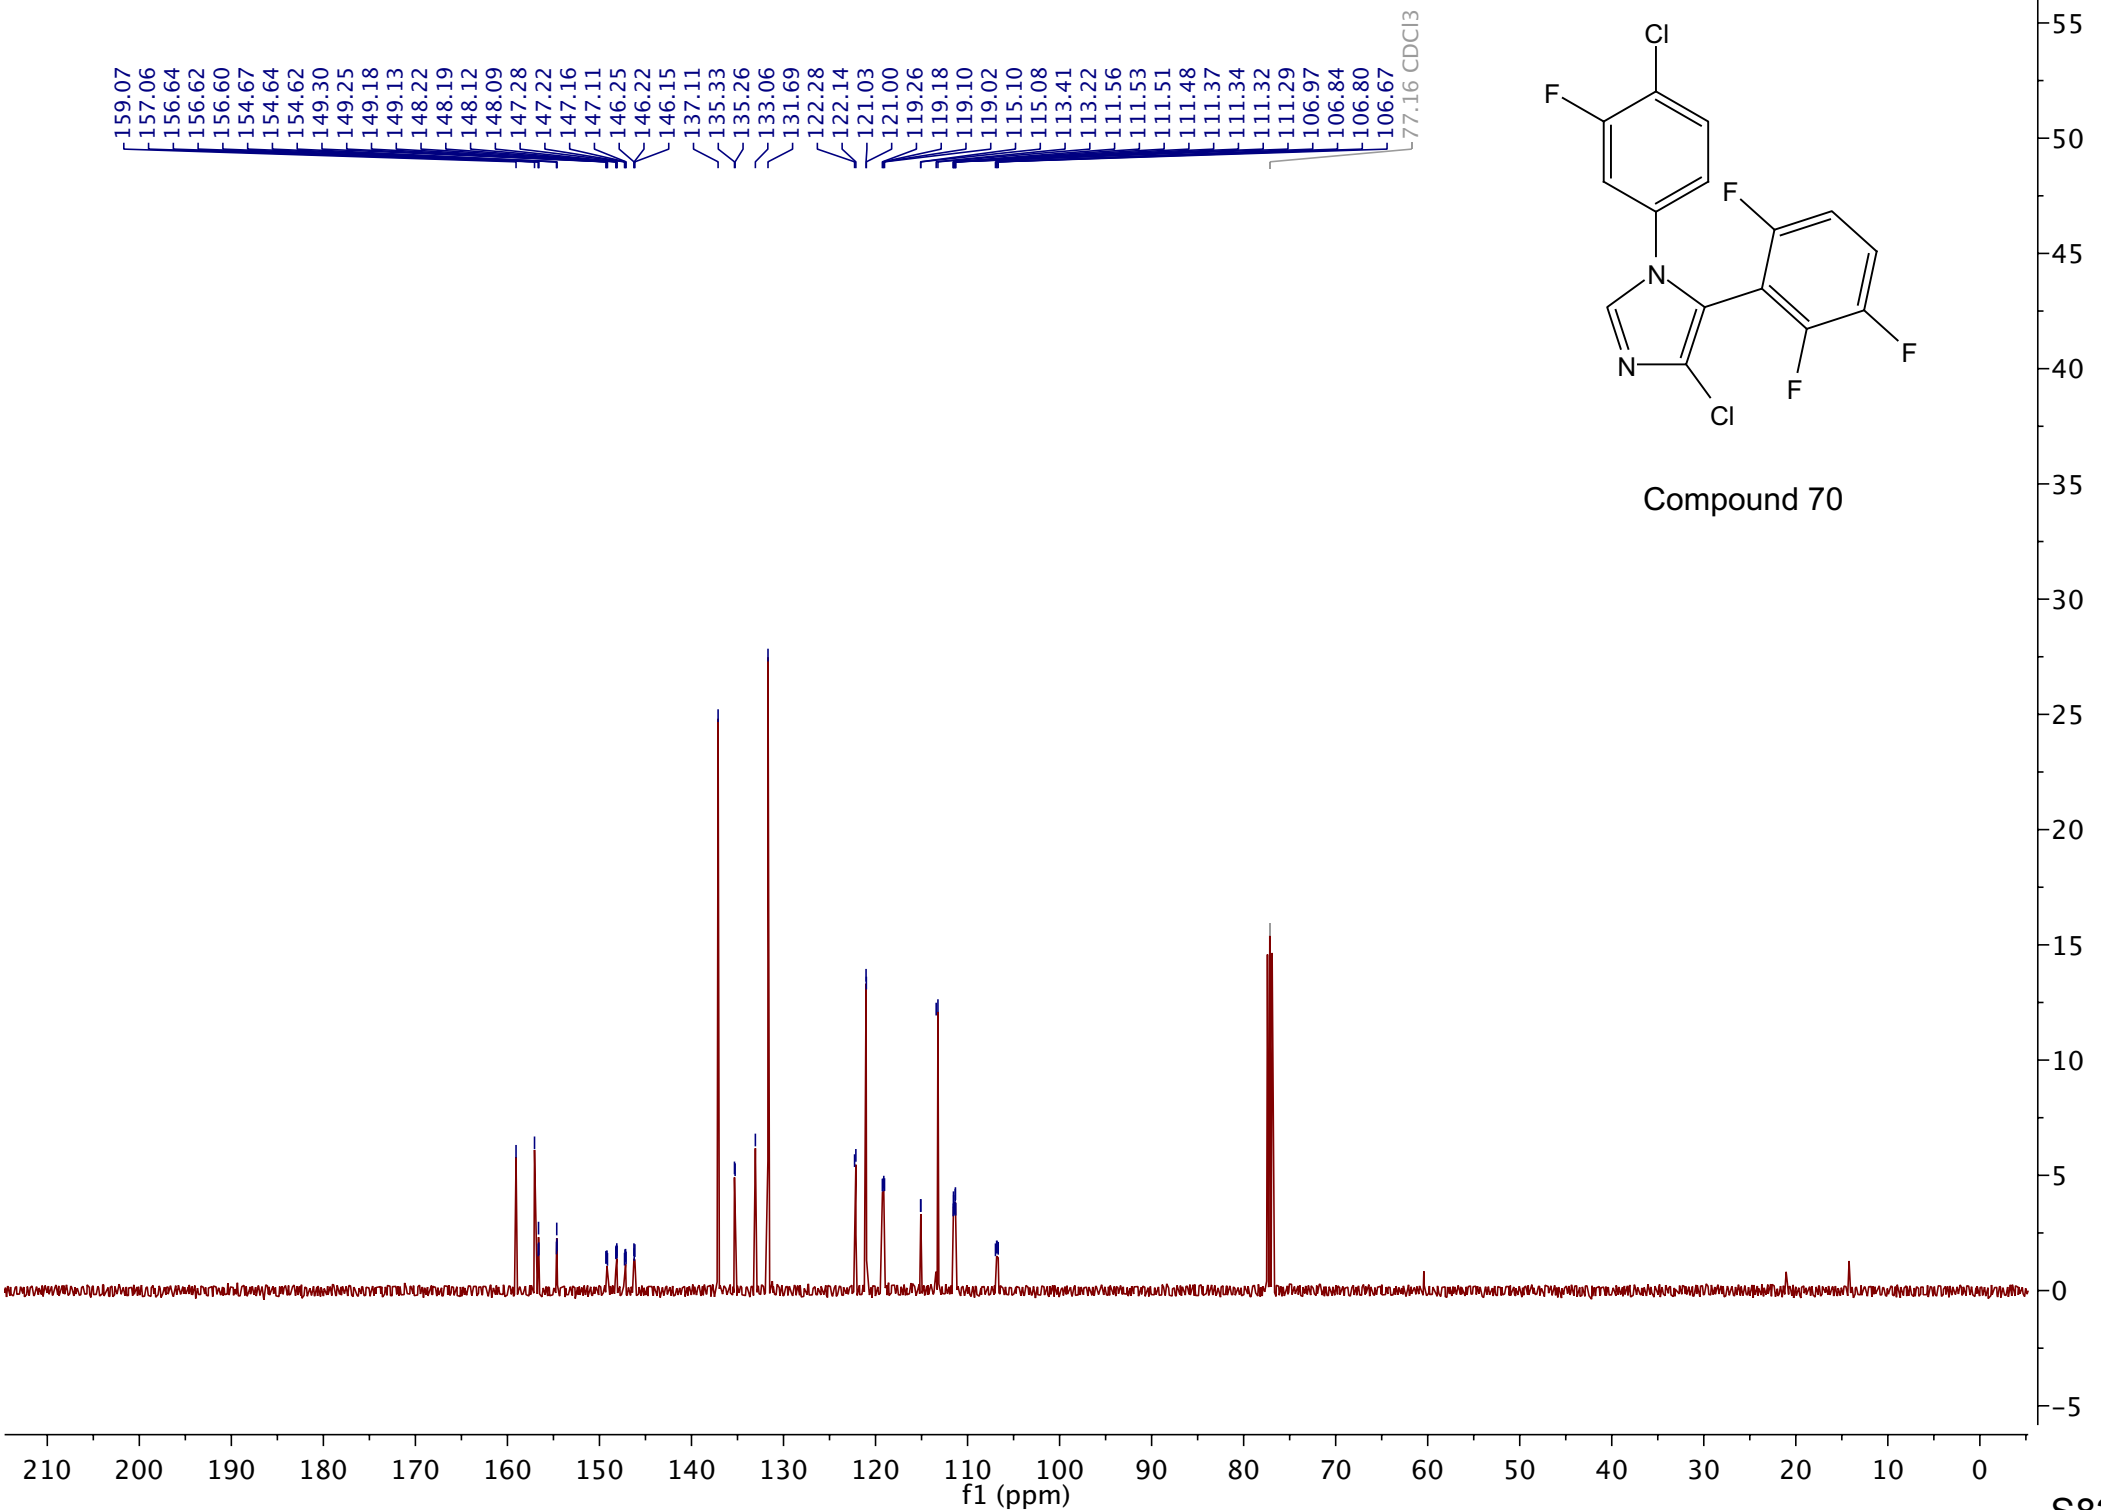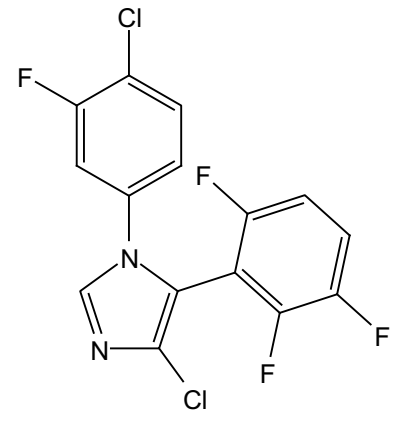

Compound 70

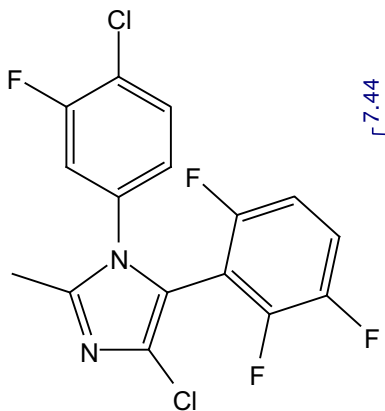

Compound 71

7.44  
7.43  
7.41  
7.26 CDCl<sub>3</sub>  
7.20  
7.19  
7.18  
7.17  
7.16  
7.15  
7.15  
7.14  
7.00  
7.00  
6.98  
6.98  
6.92  
6.90  
6.84  
6.84  
6.84  
6.83  
6.83  
6.83  
6.82  
6.82  
6.82  
6.81  
6.81  
6.80  
6.80

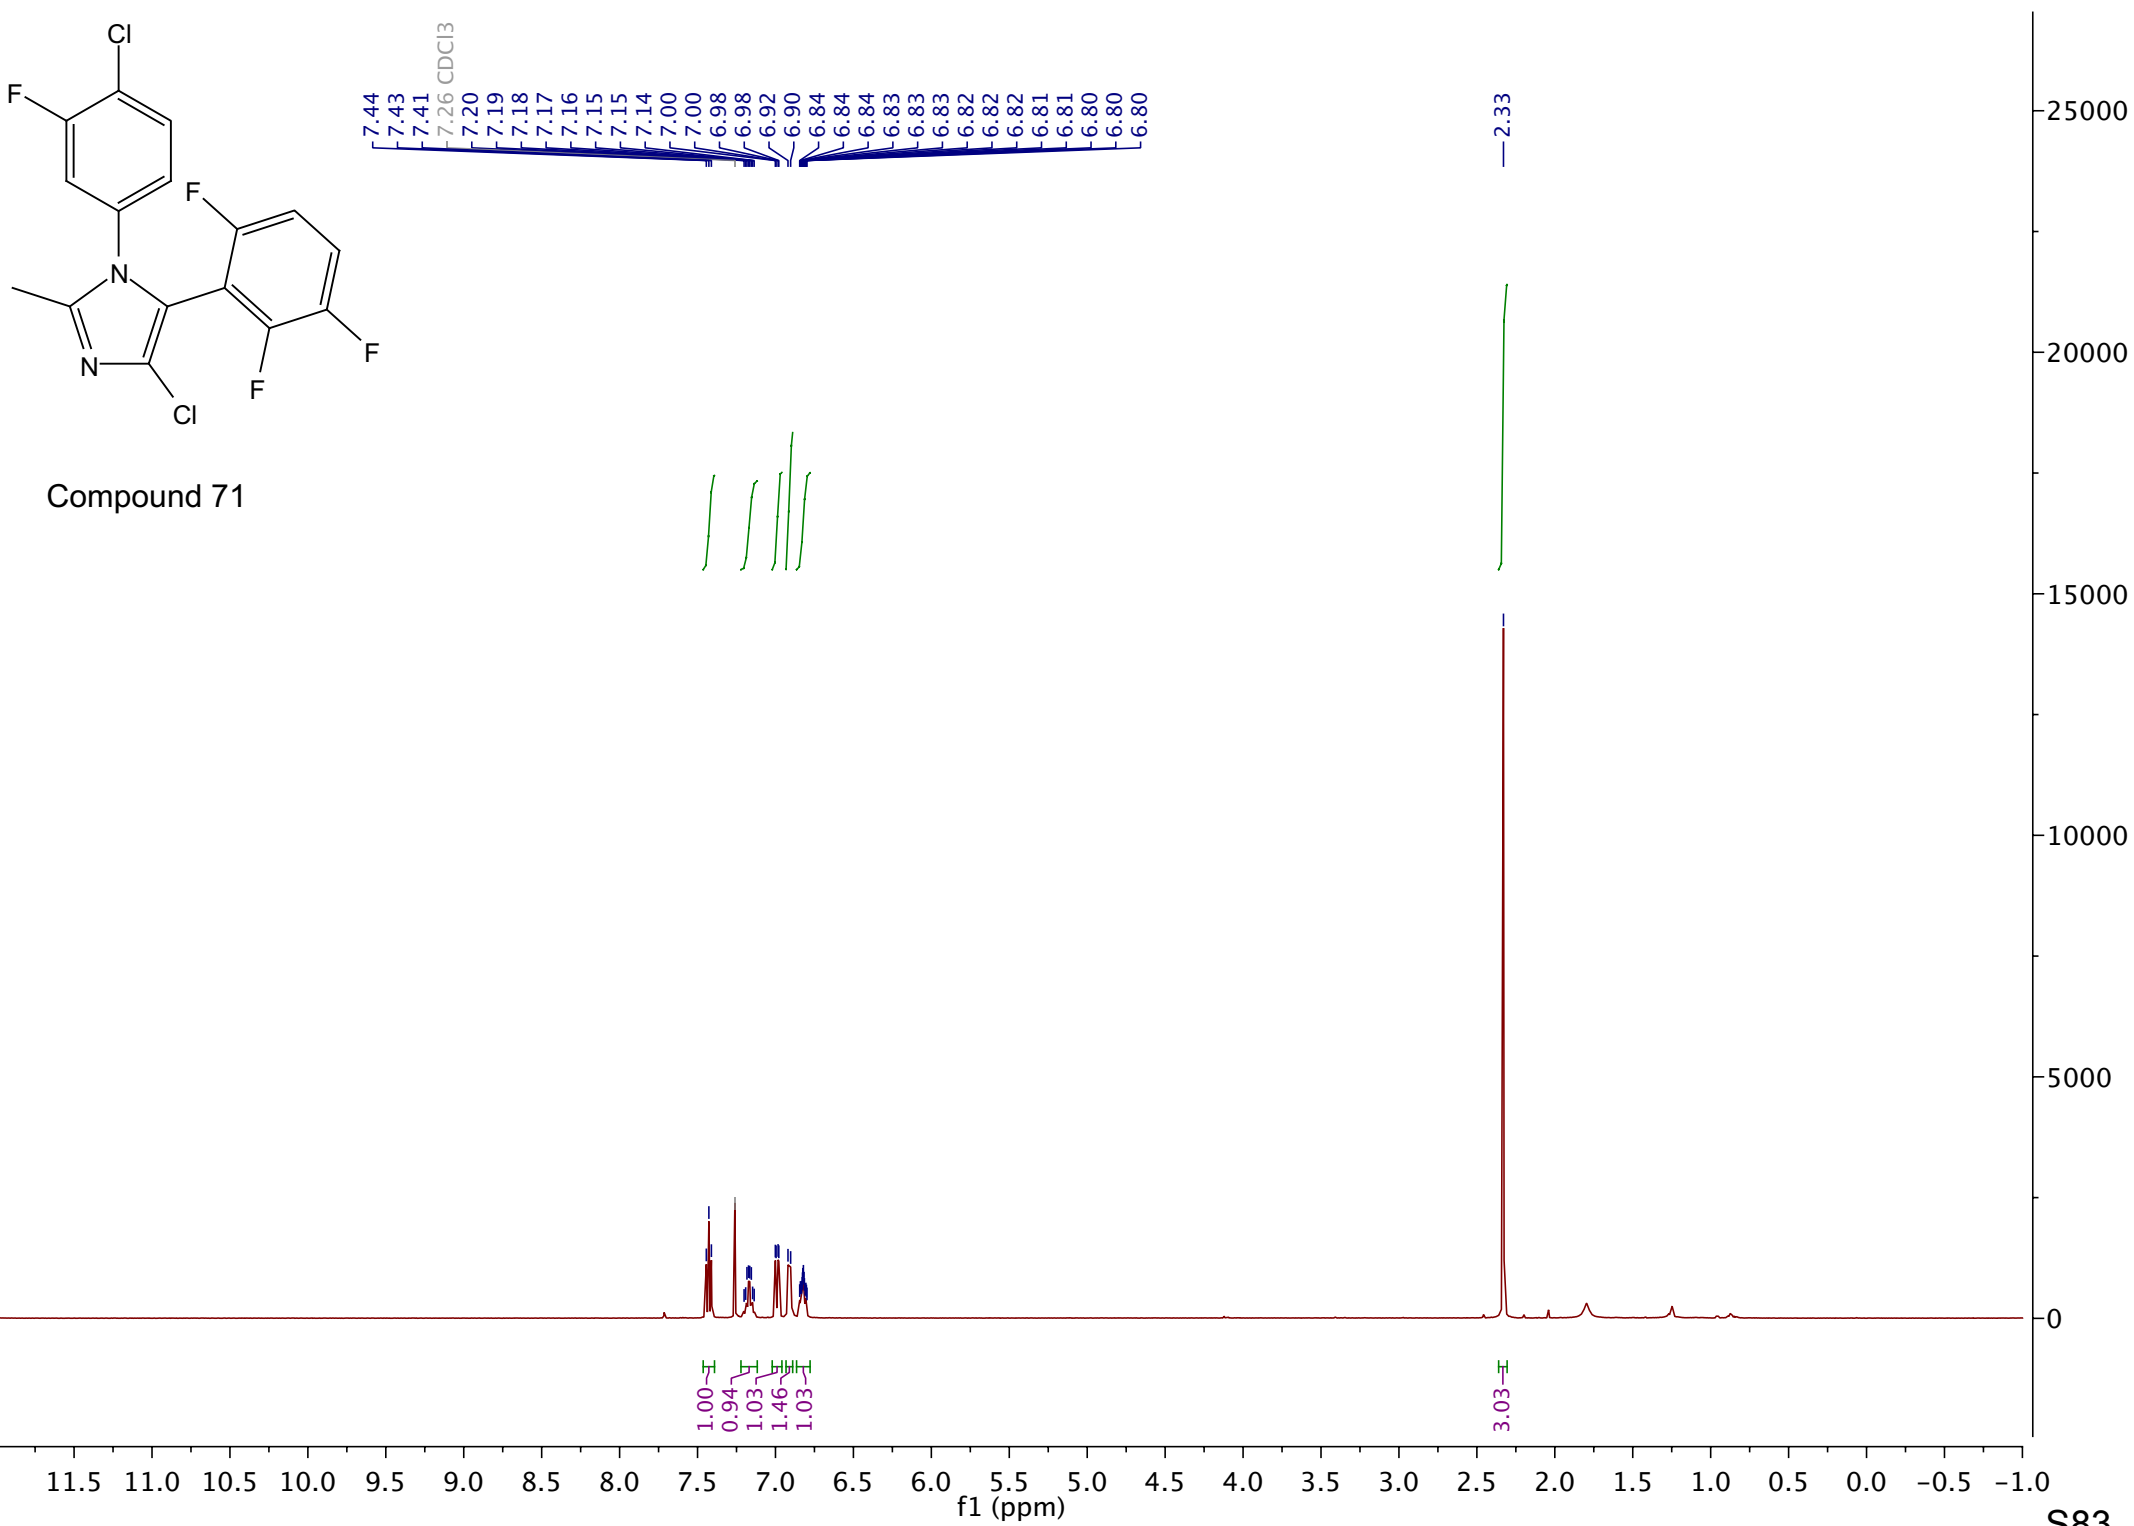

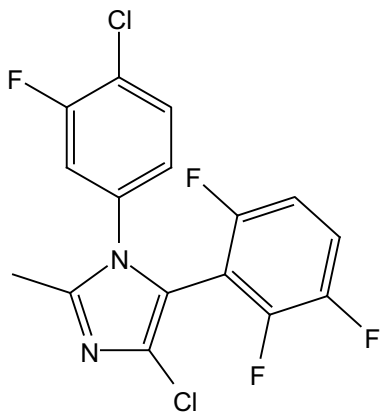

Compound 71

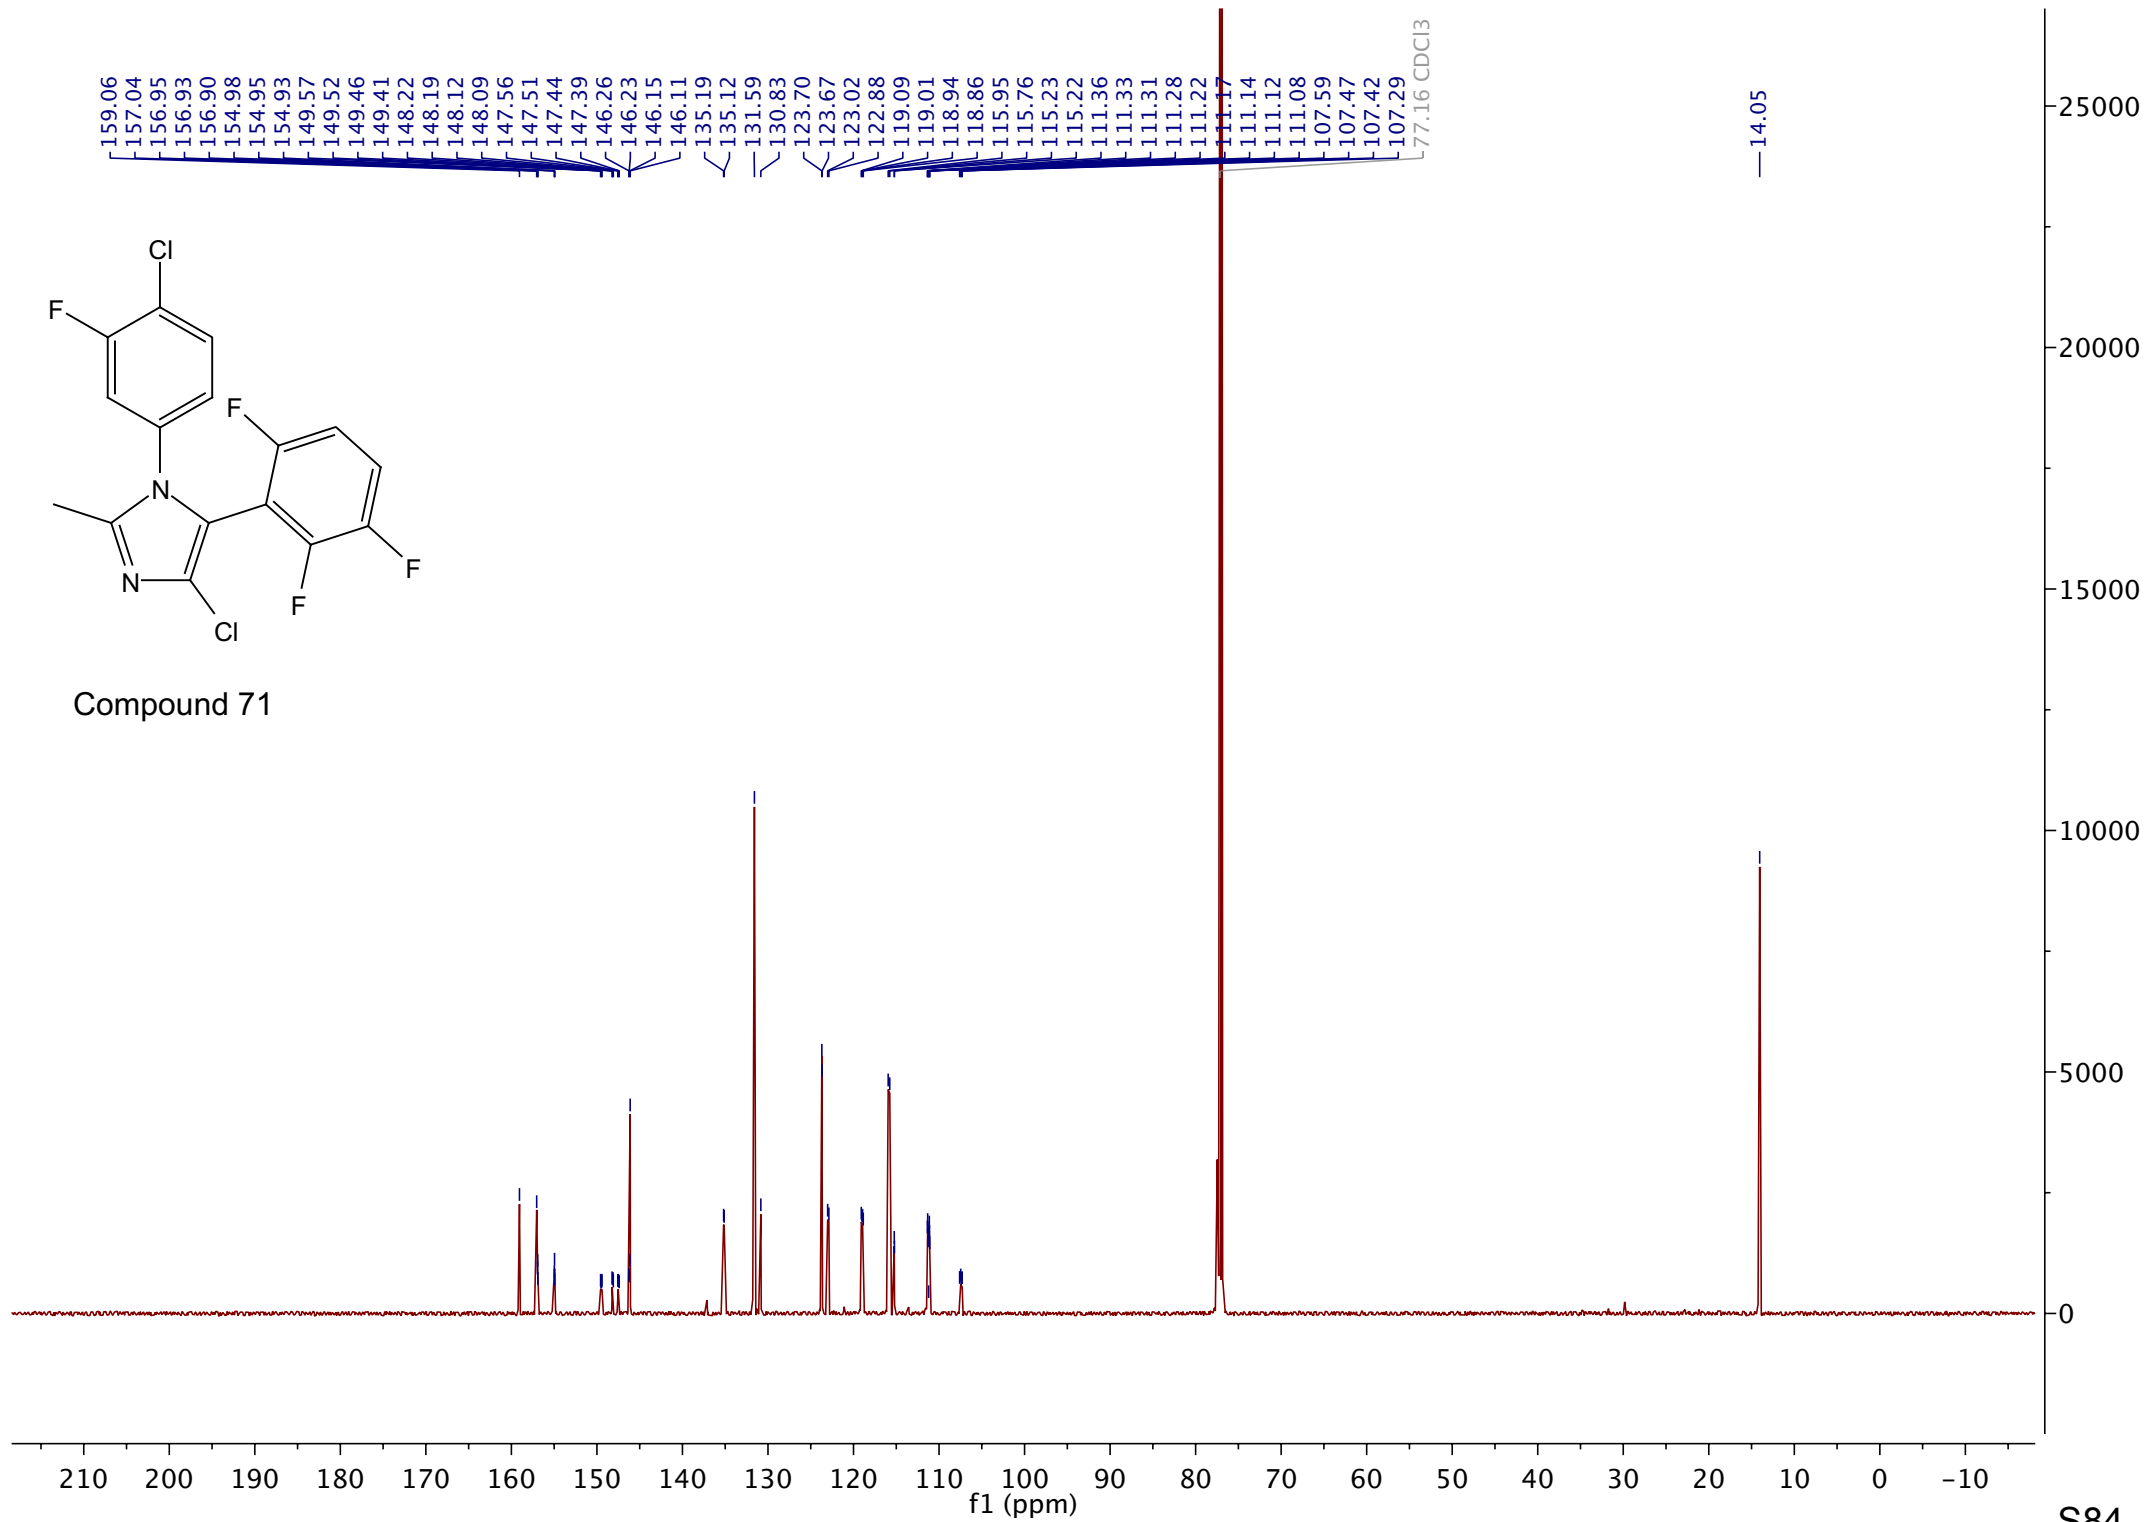

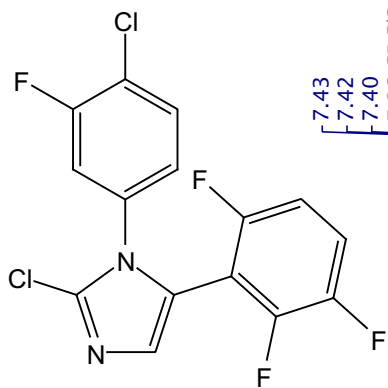

Compound 72

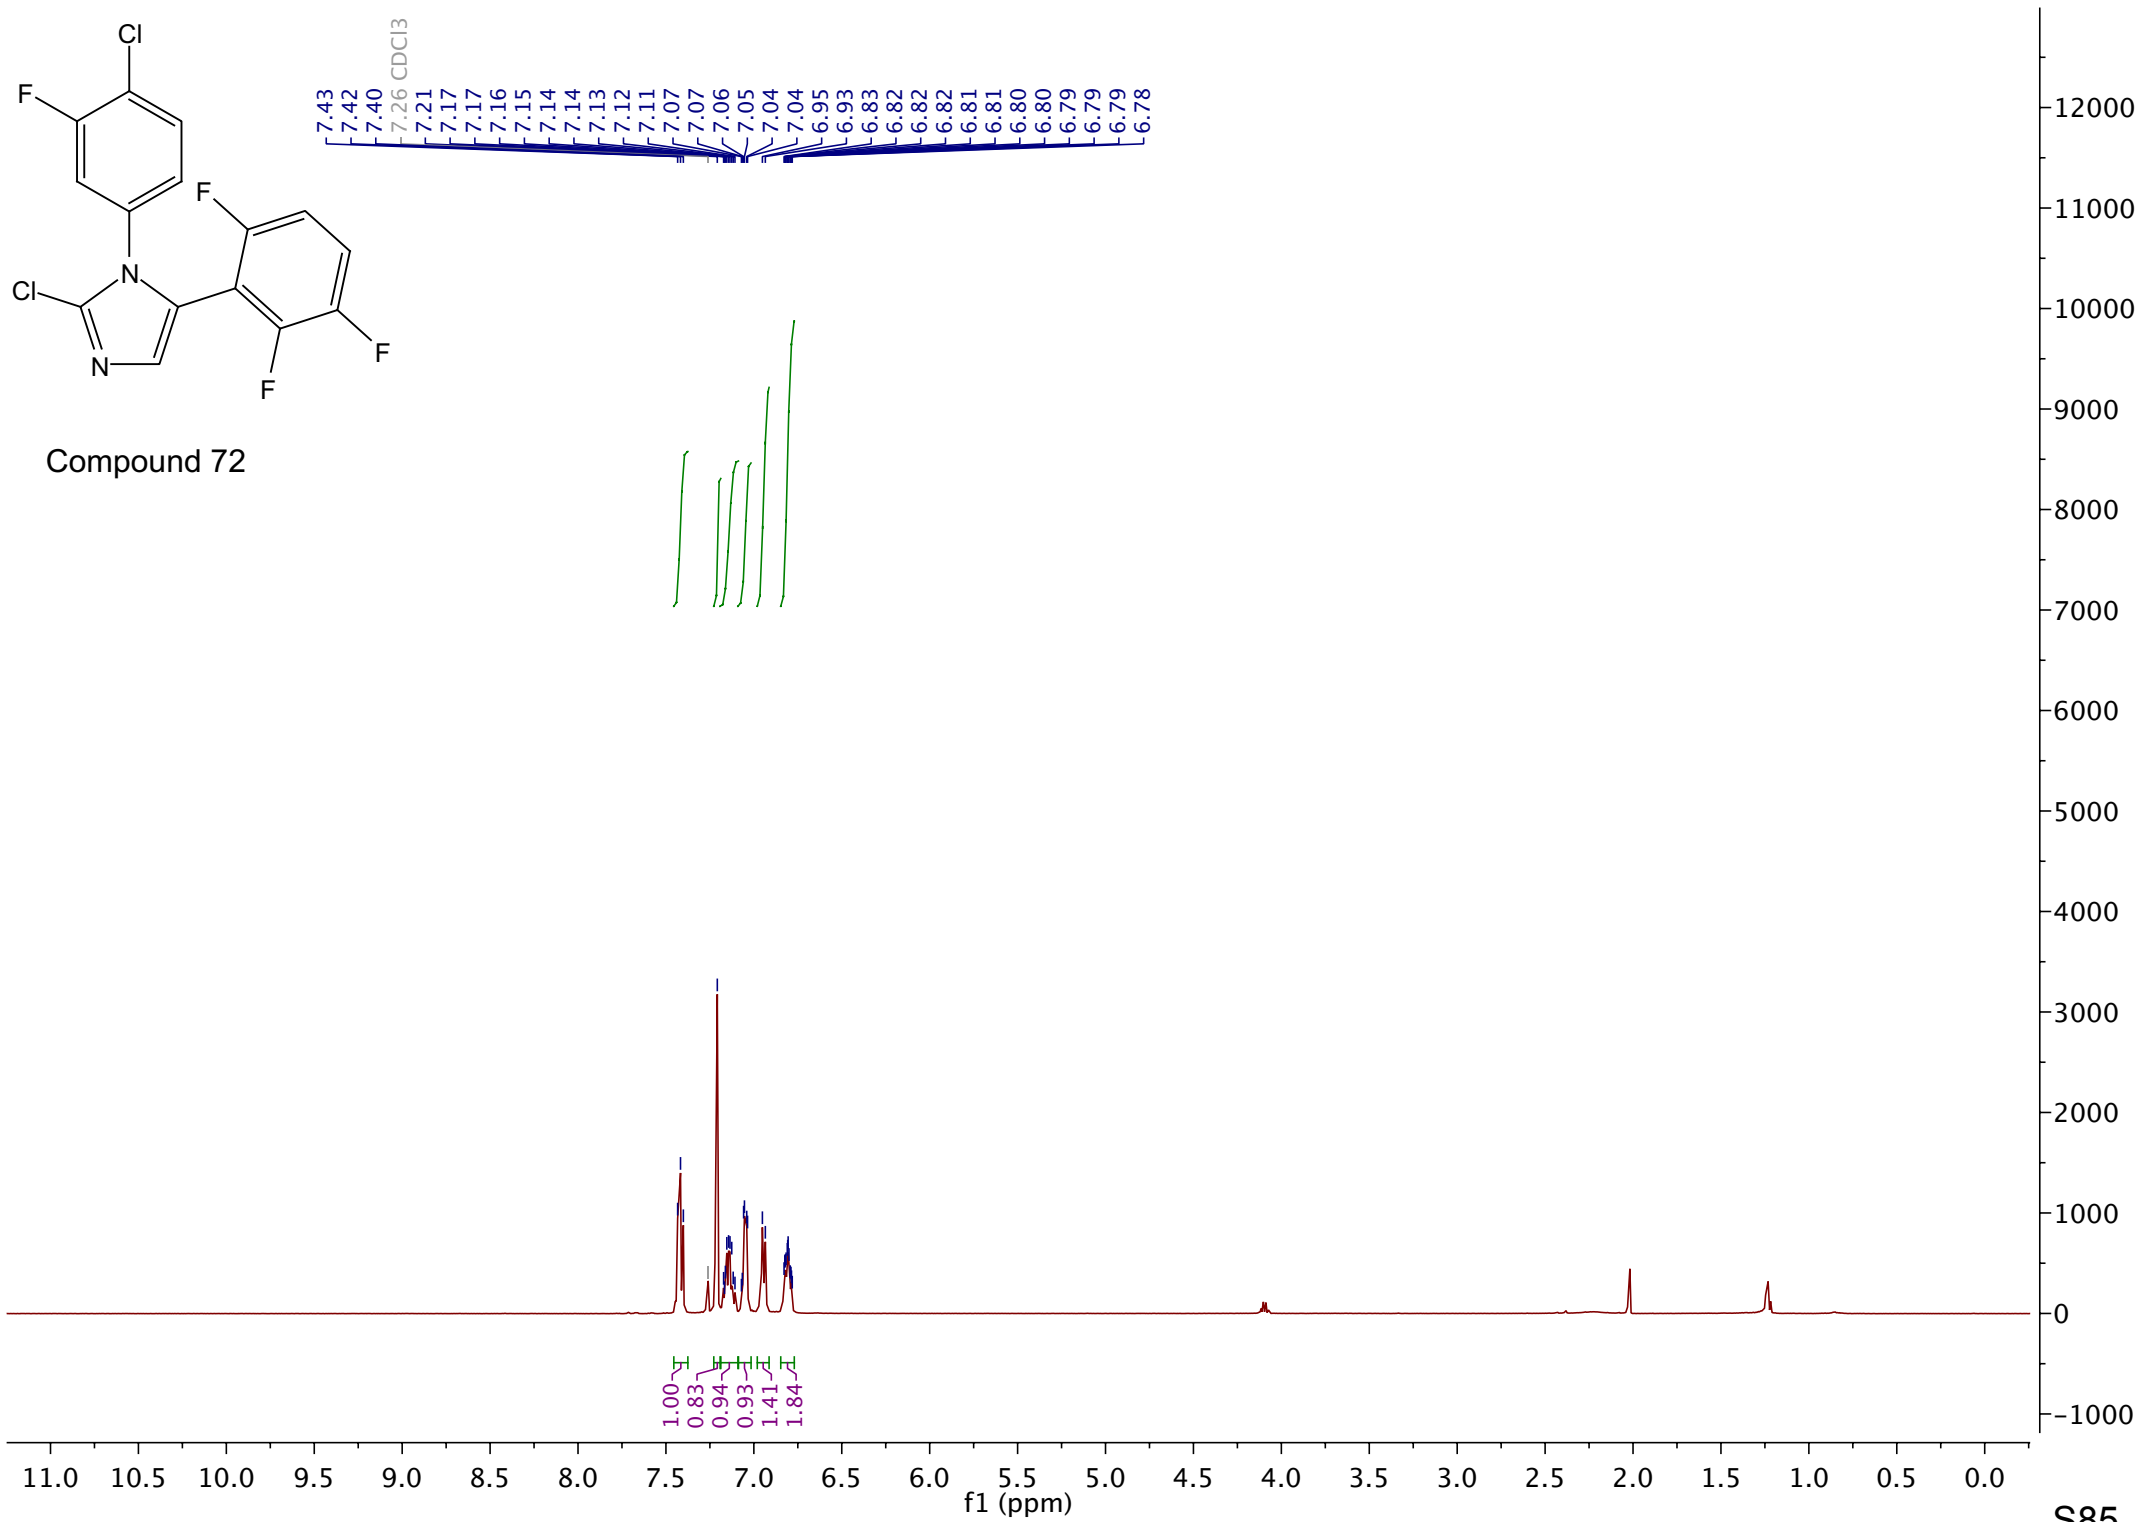

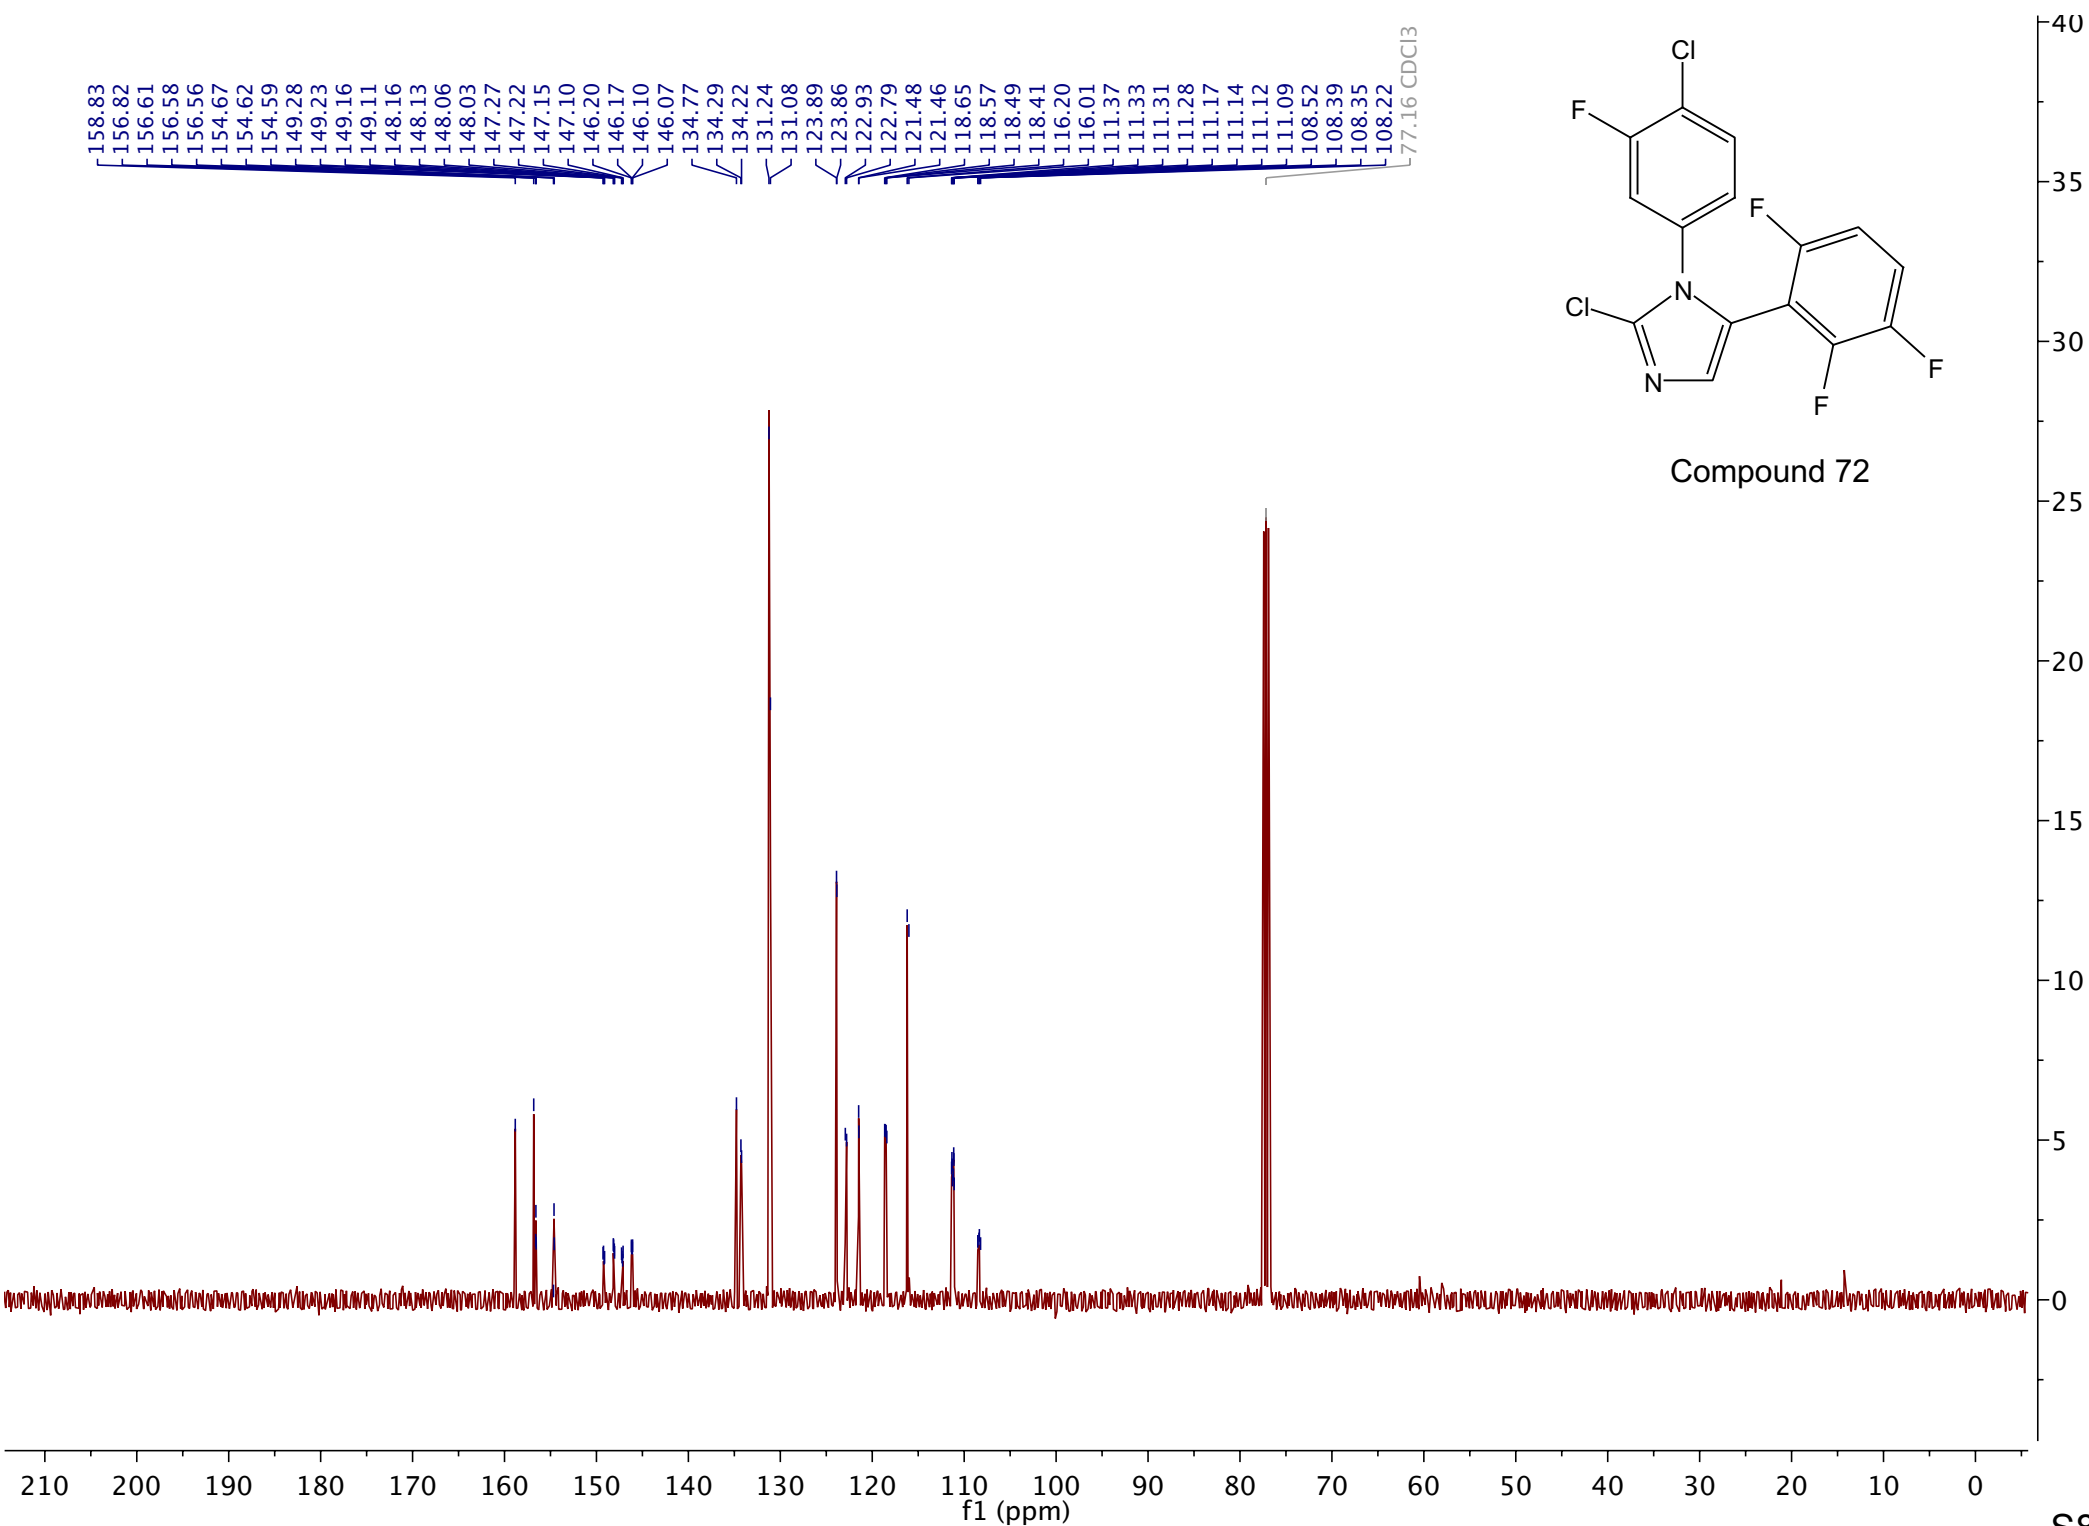

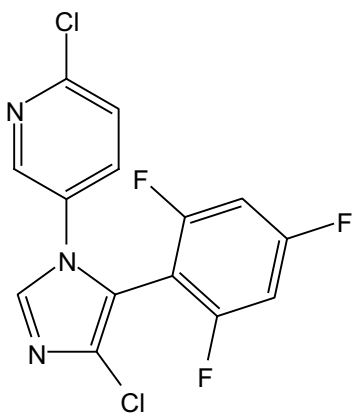

Compound 73

8.24  
8.23  
7.70  
7.48  
7.48  
7.47  
7.46  
7.38  
7.36  
7.26 CDCl<sub>3</sub>  
6.72  
6.70  
6.69

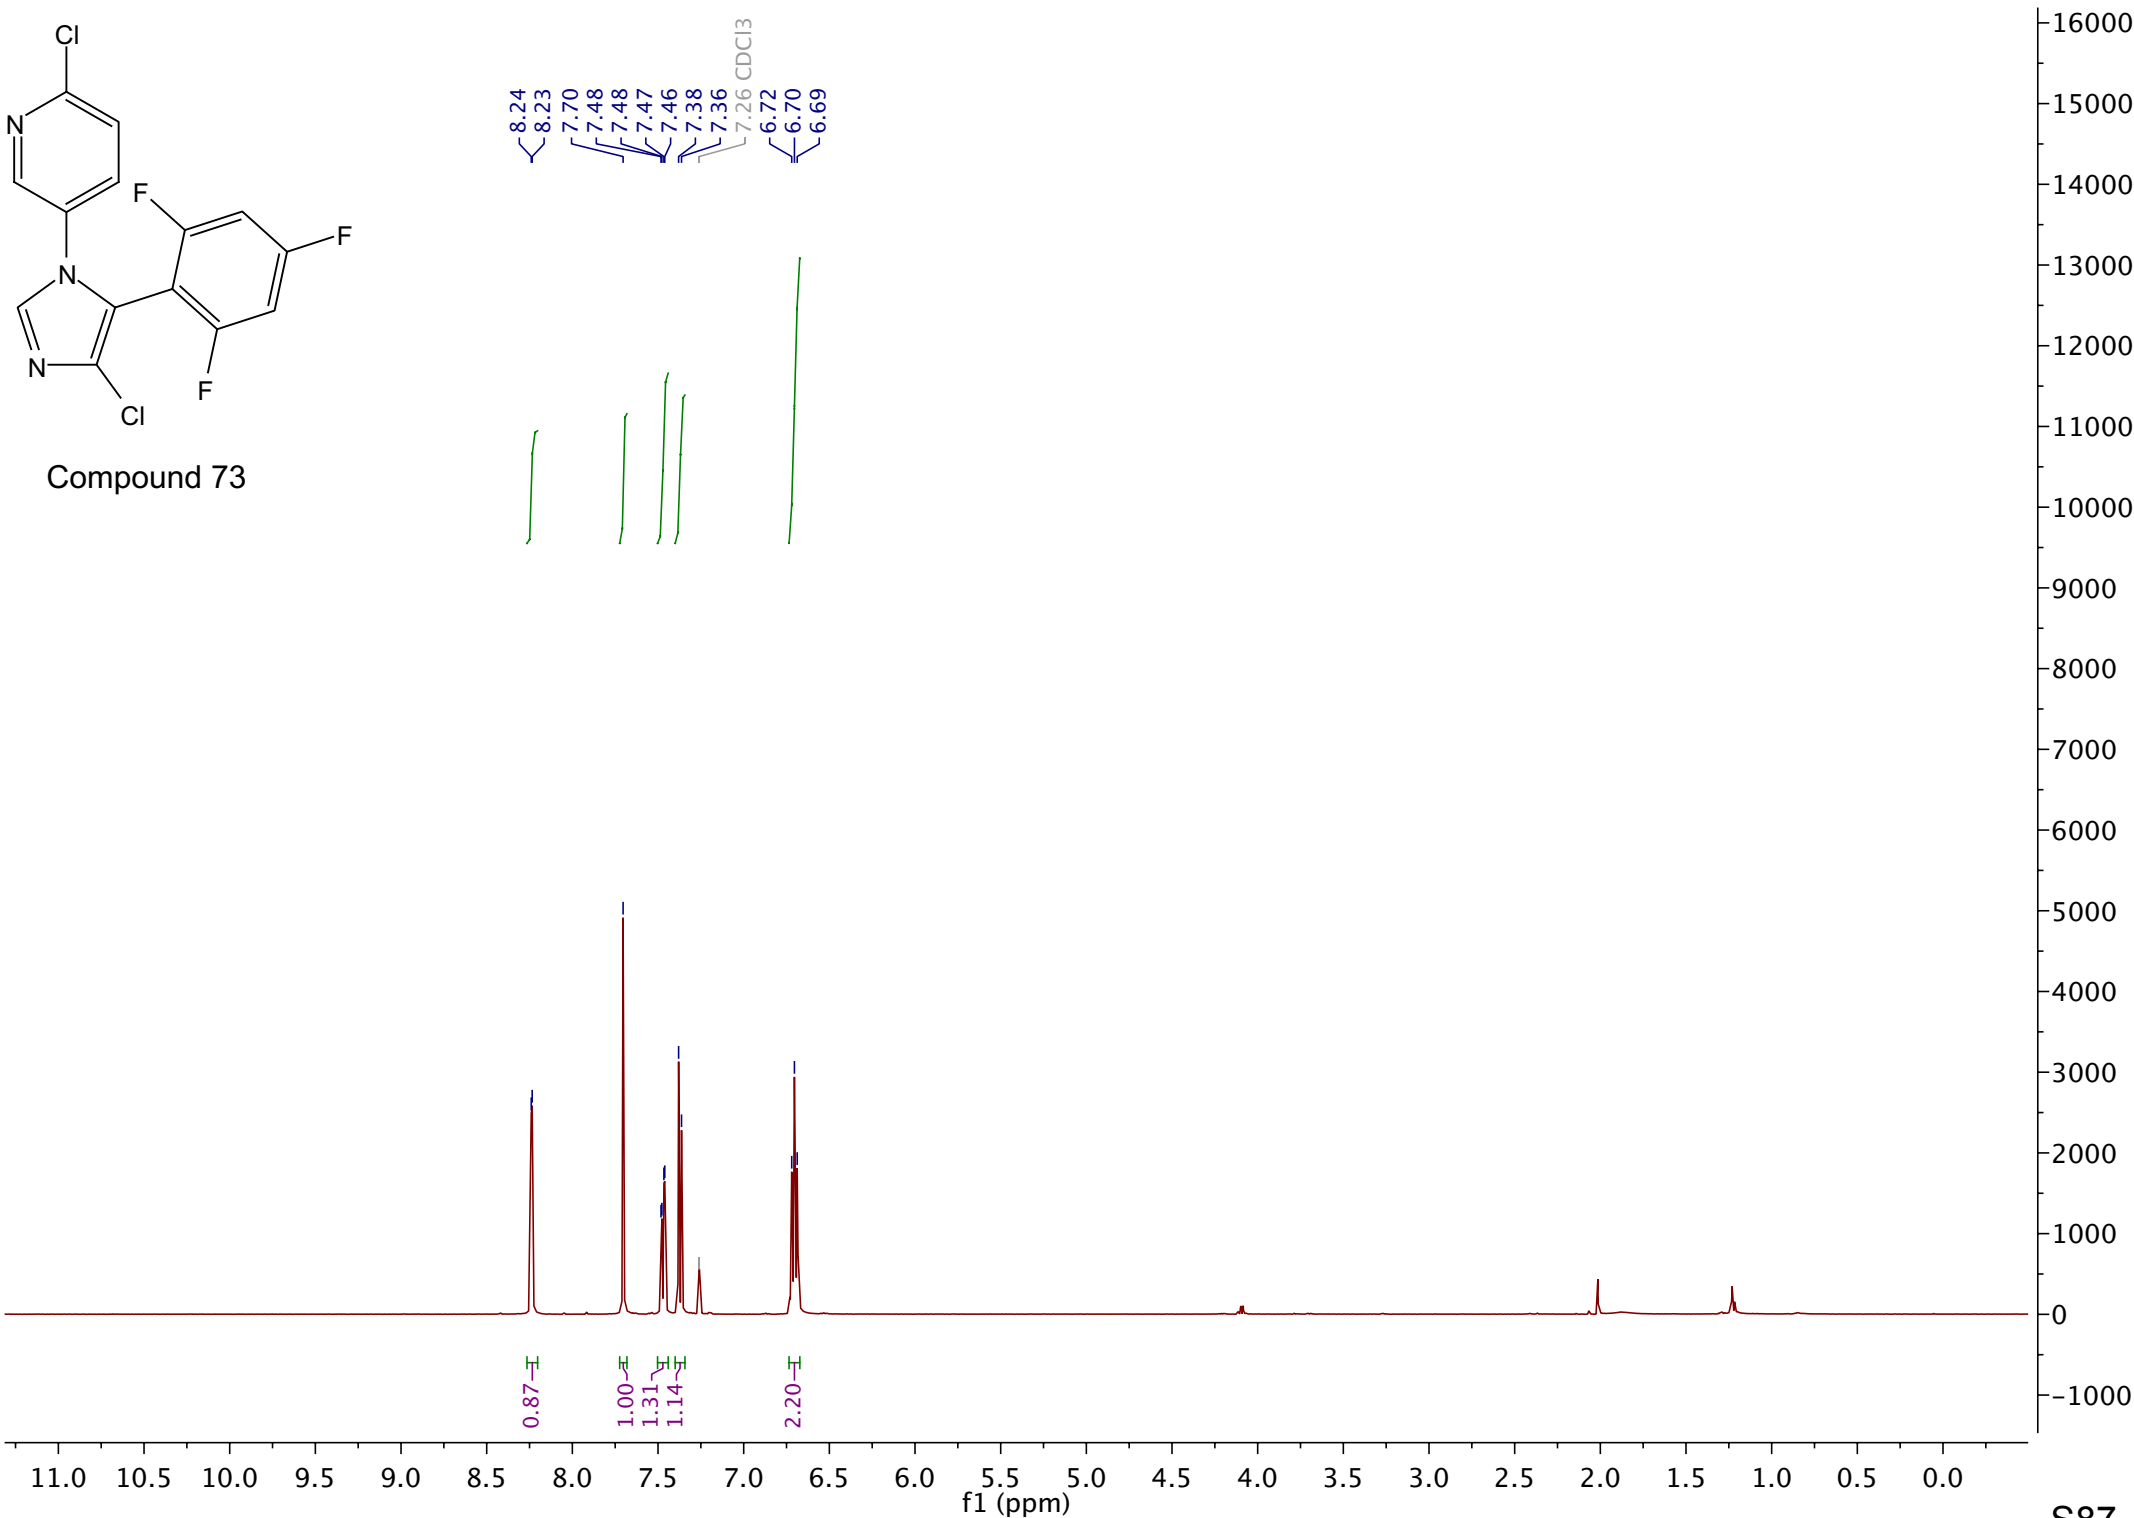

165.35  
165.23  
165.11  
163.33  
163.21  
163.09  
162.07  
162.00  
161.95  
161.88  
160.06  
159.99  
159.94  
159.87  
151.97  
— 145.53  
136.91  
134.87  
133.36  
131.72  
— 125.18  
— 115.41  
101.48  
101.45  
101.42  
101.38  
101.34  
101.29  
101.27  
101.24  
101.22  
101.18  
101.09  
101.06  
101.03

— 77.16 CDCl<sub>3</sub>

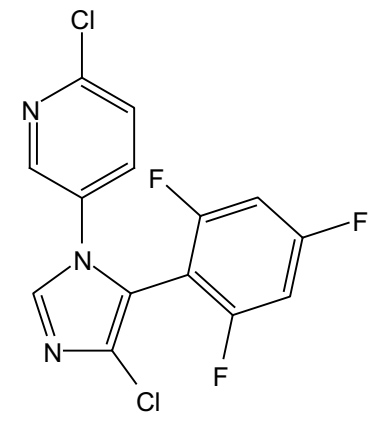

Compound 73

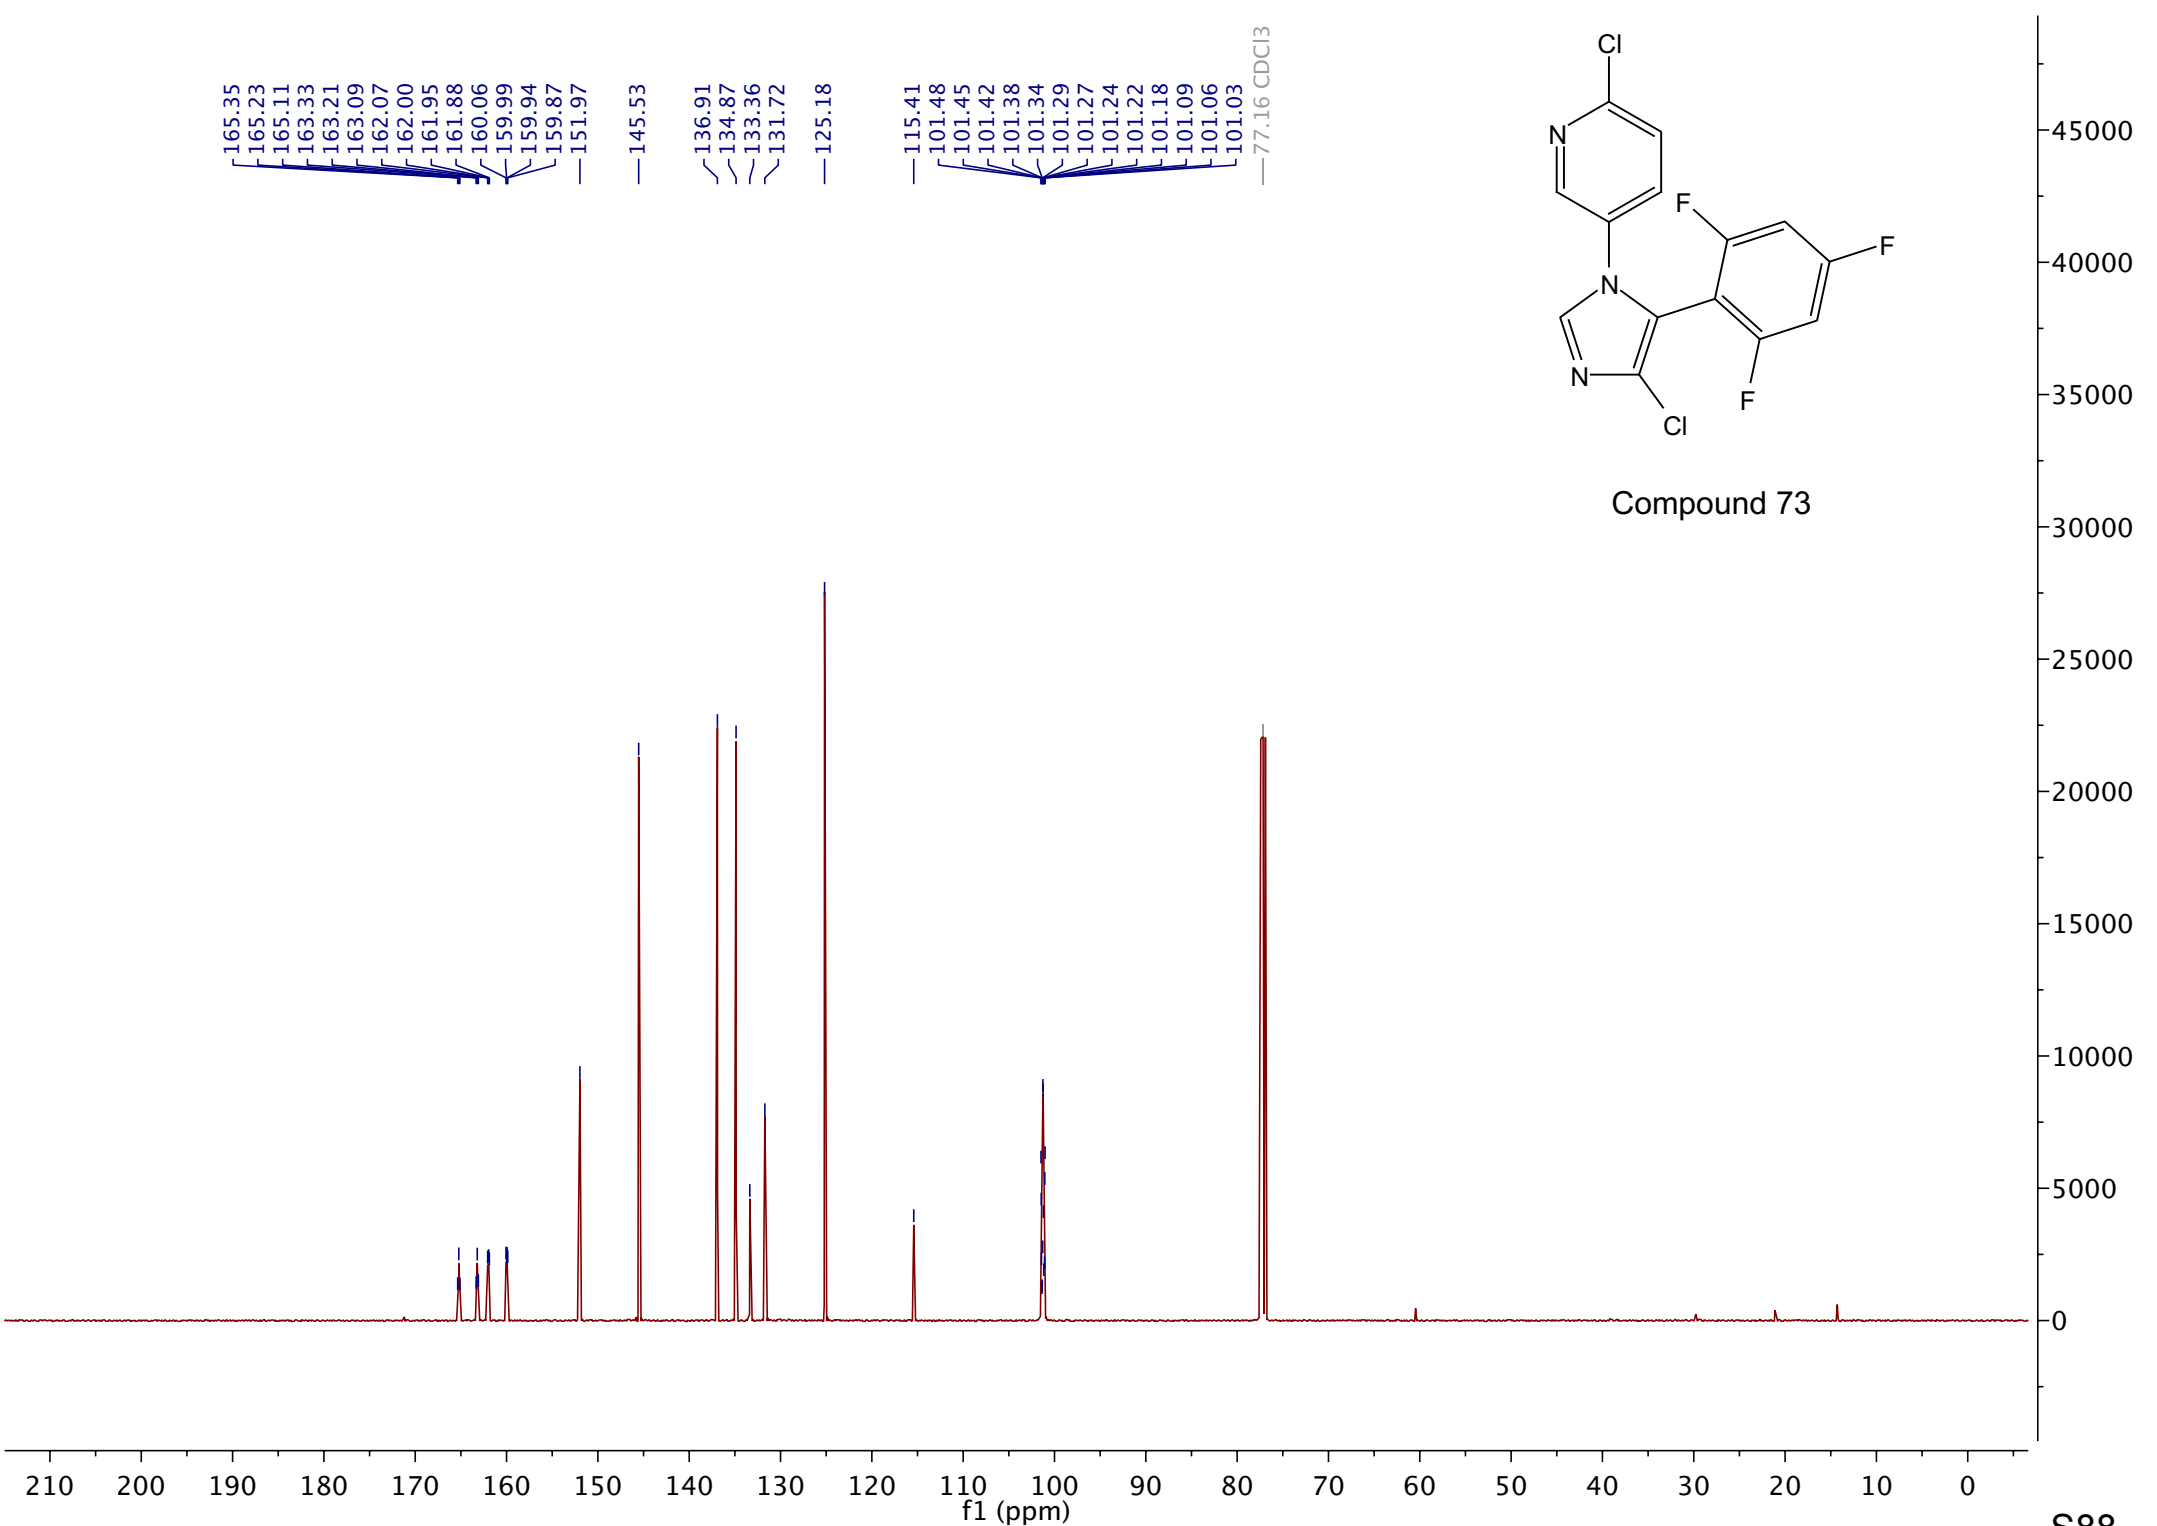



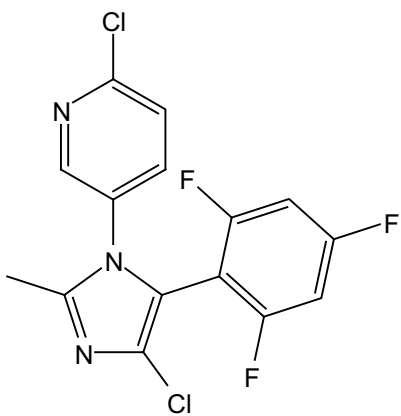

Compound 74

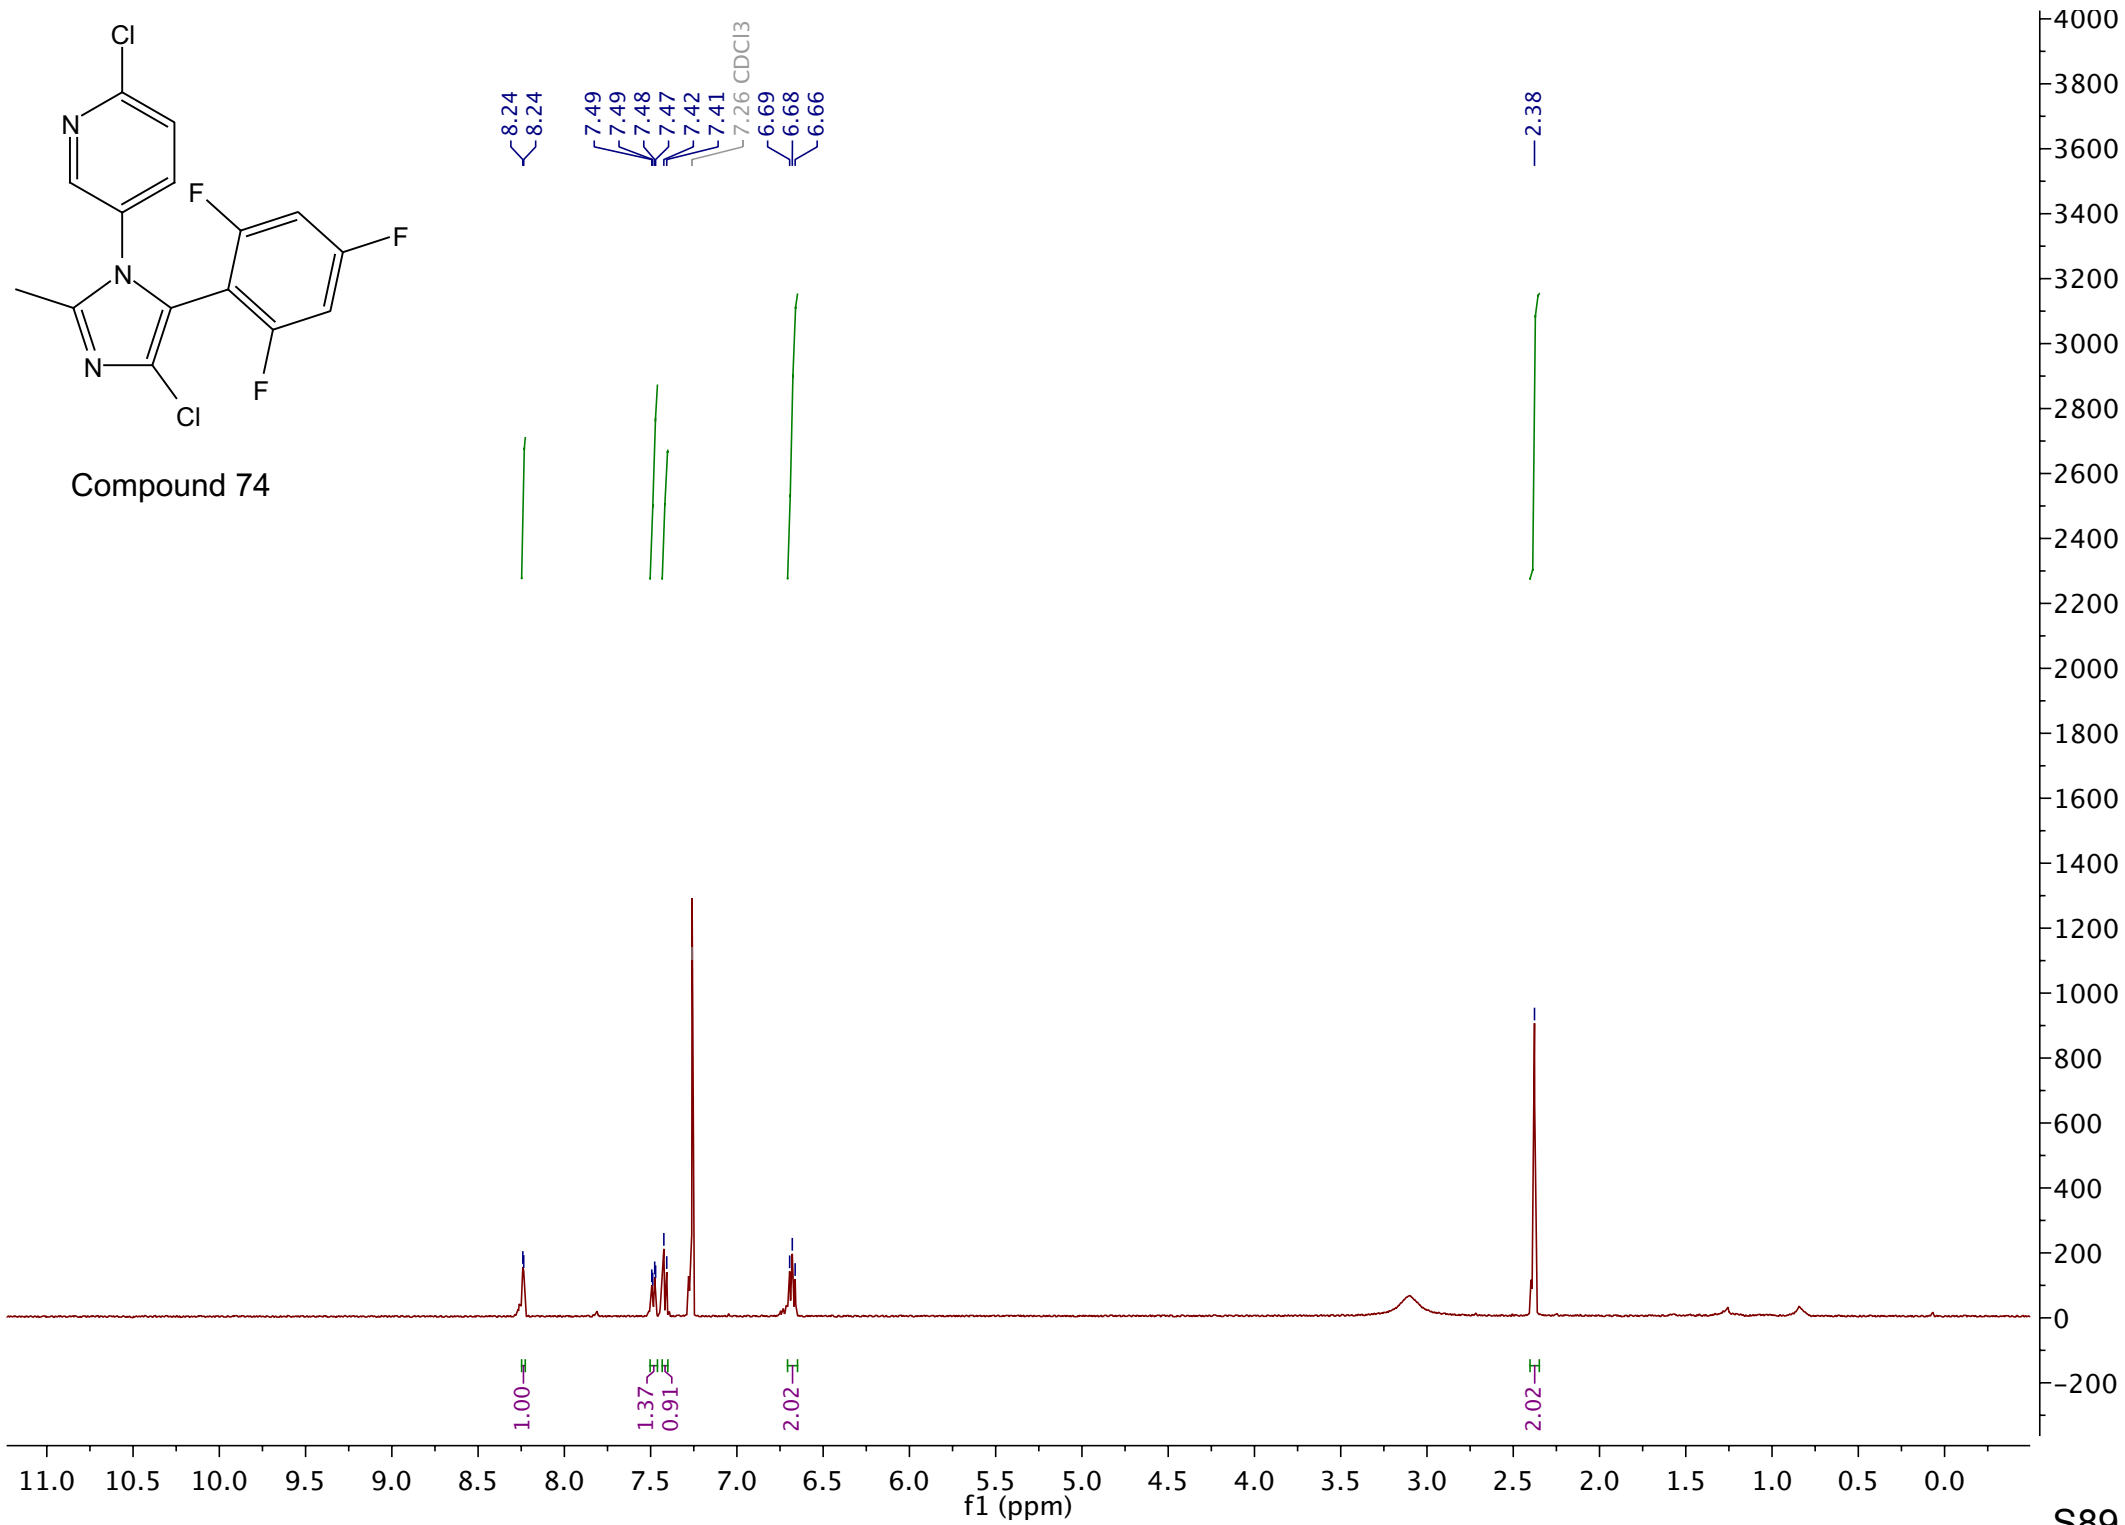

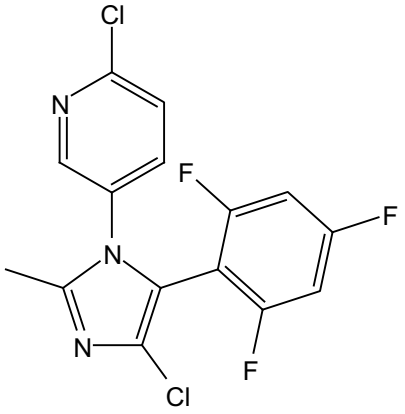

Compound 74

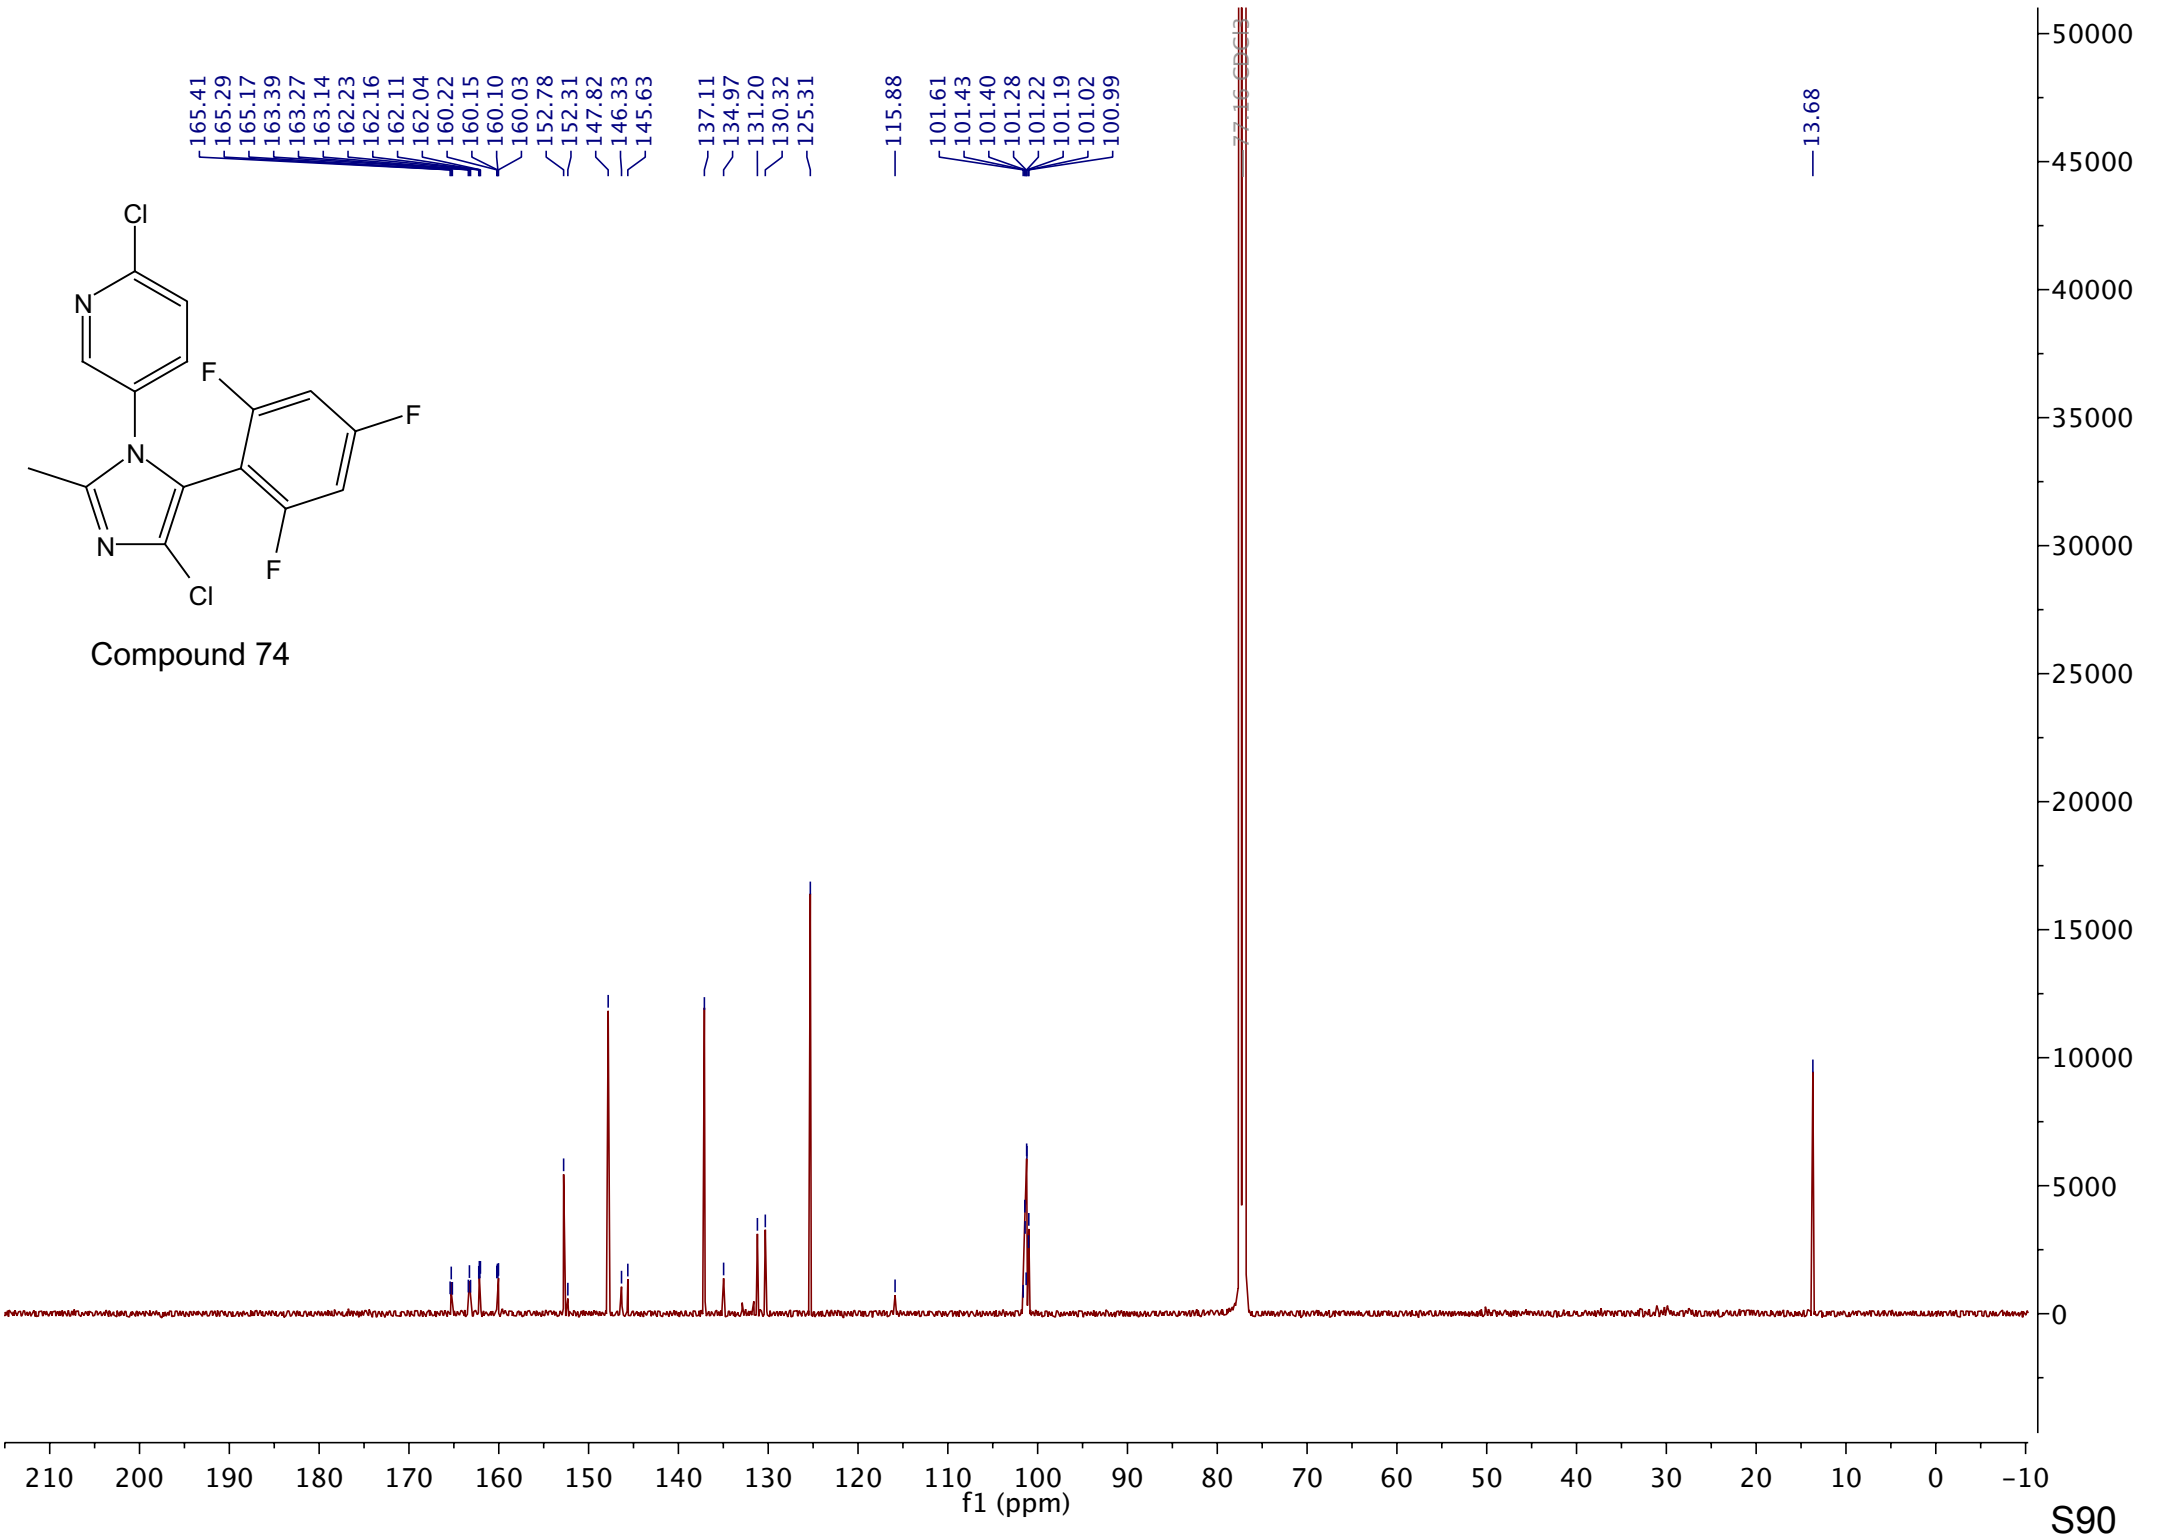

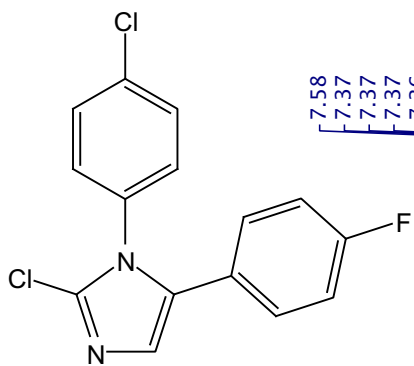

Compound 75

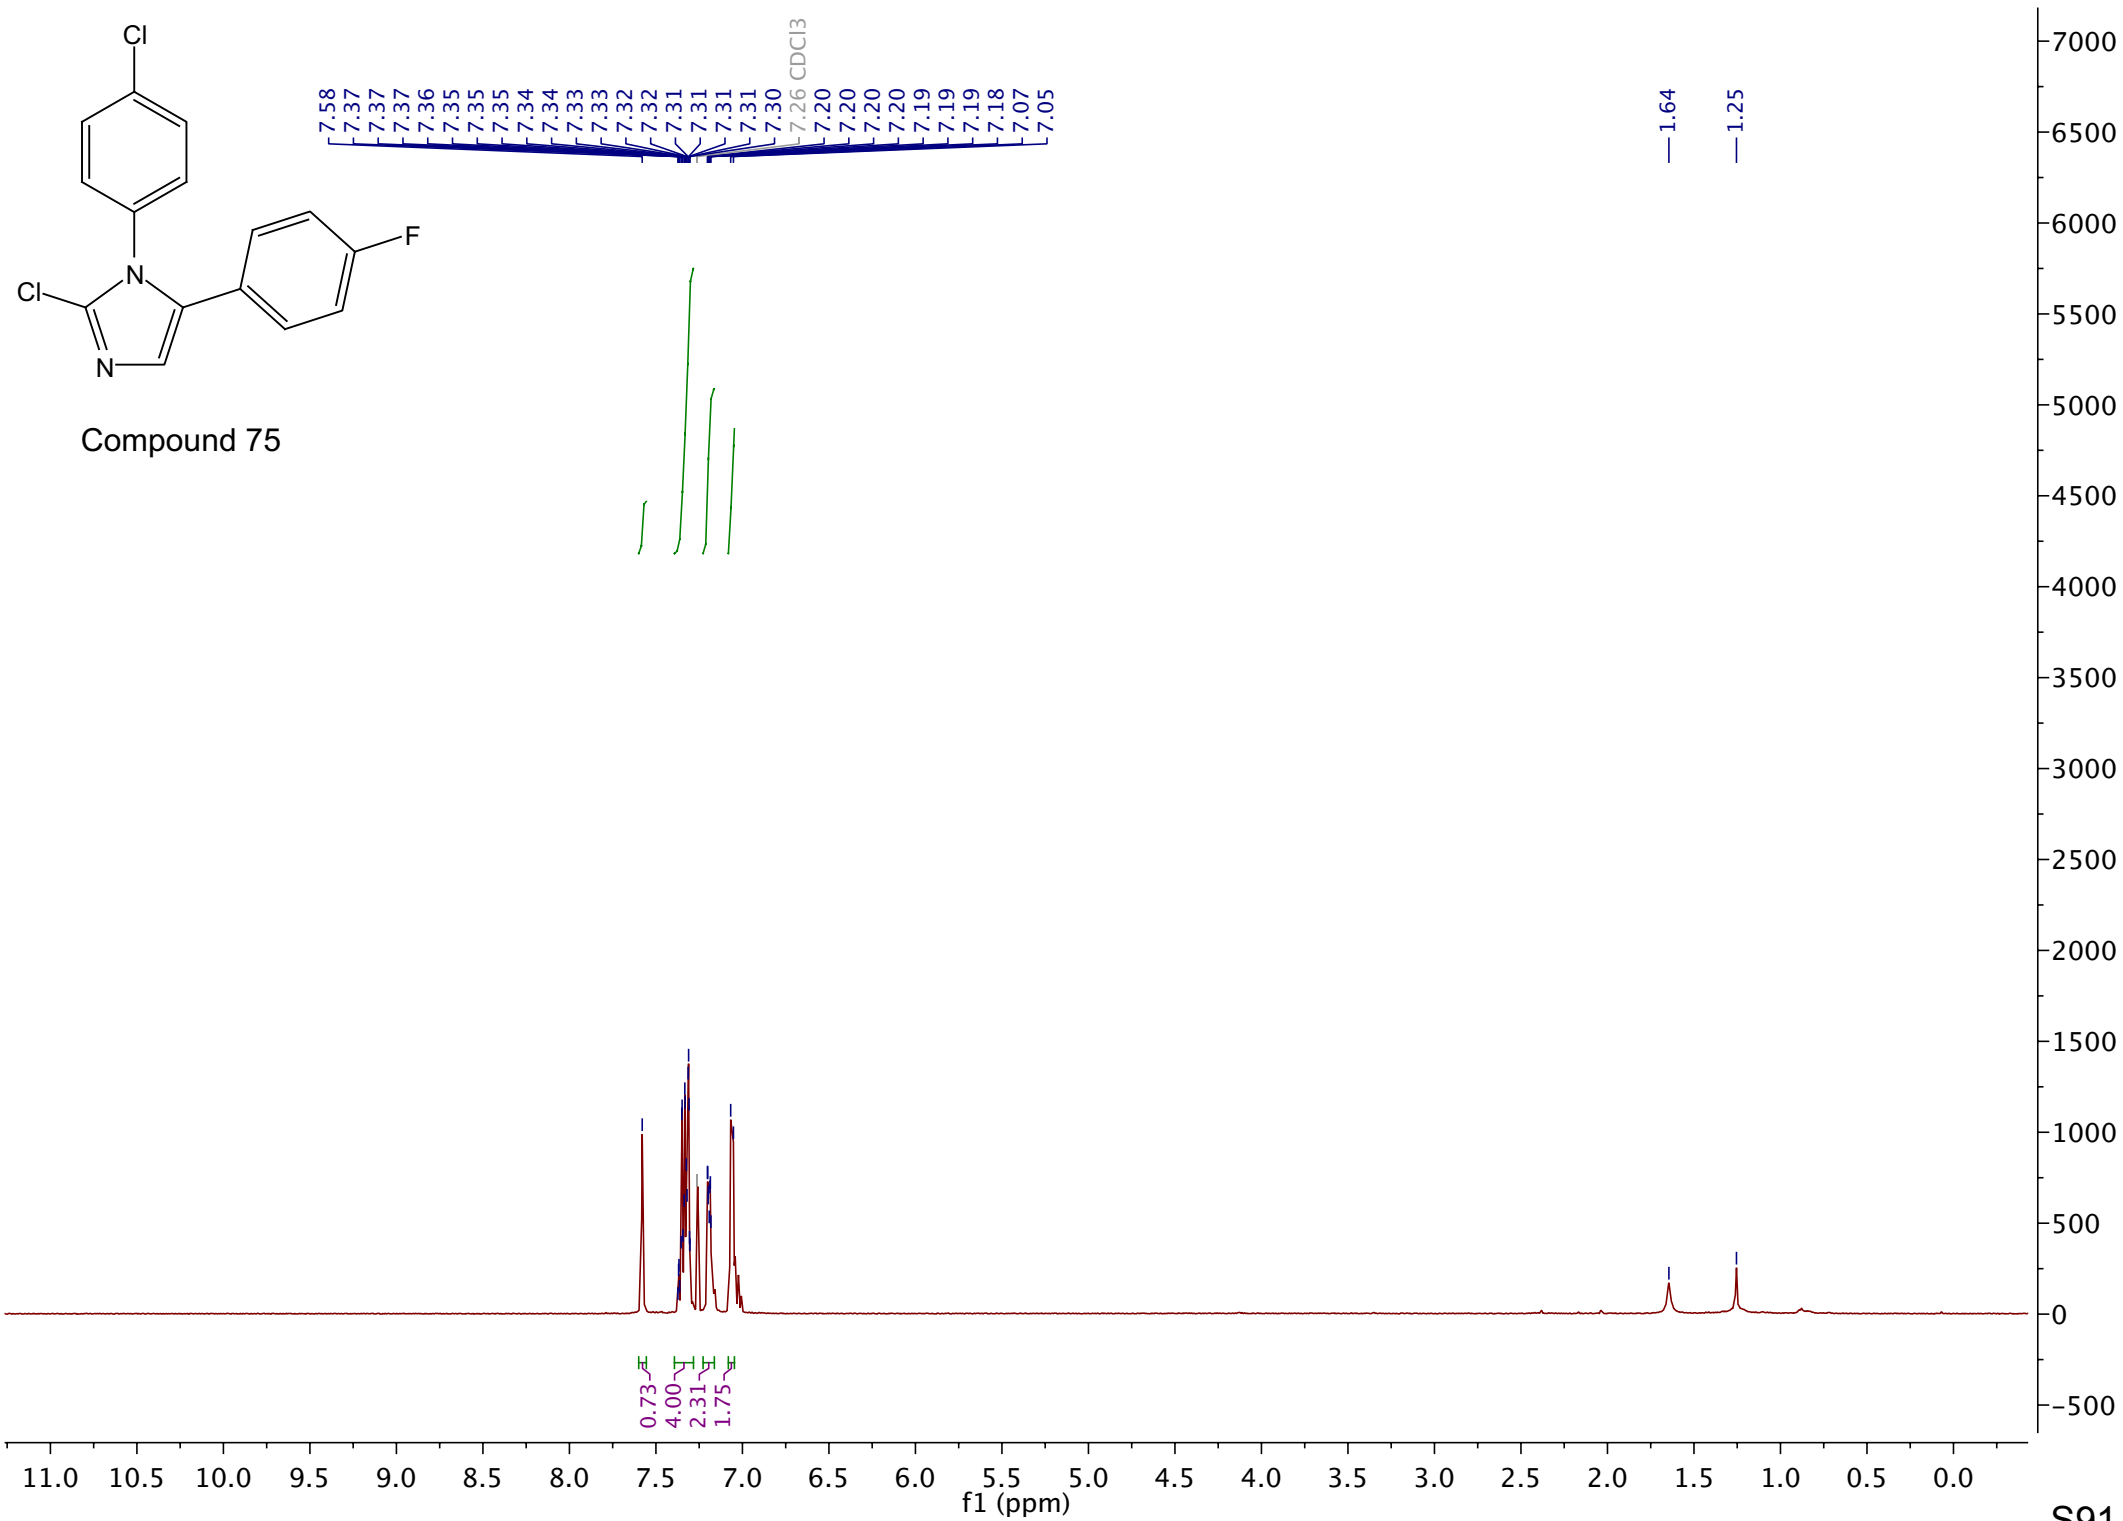

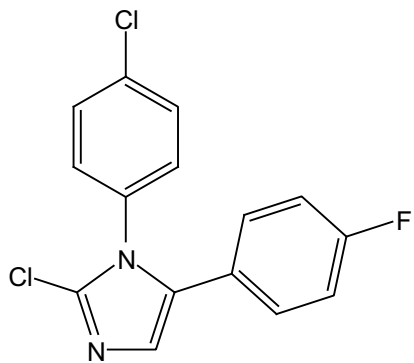

Compound 75

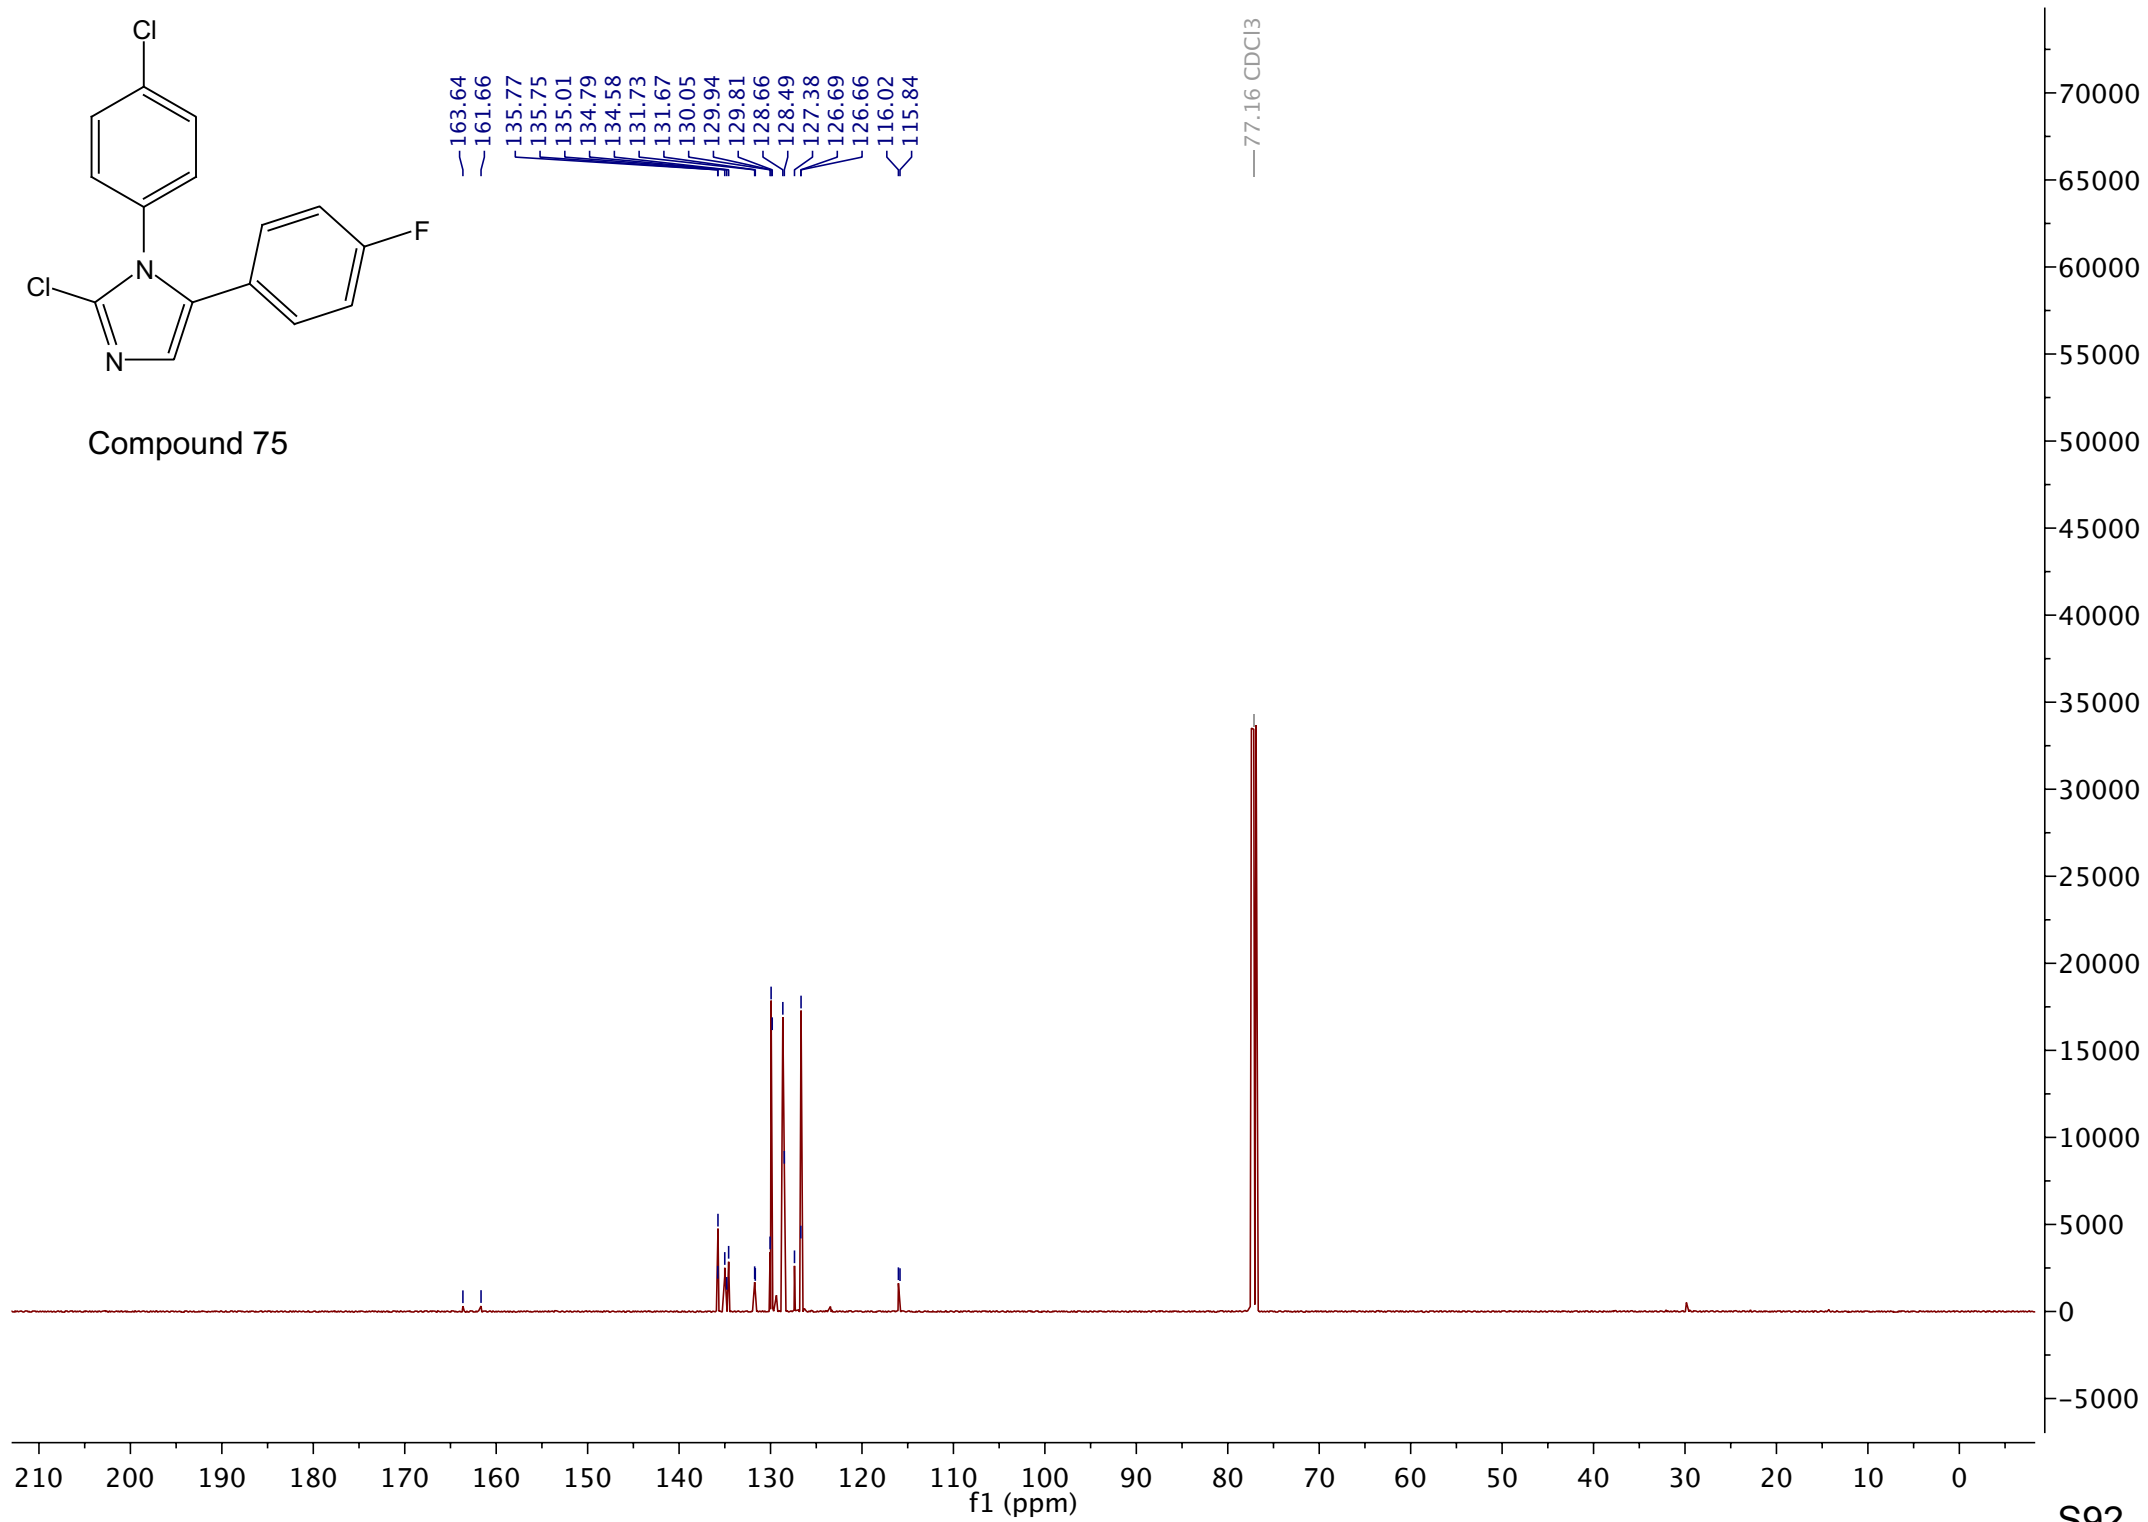

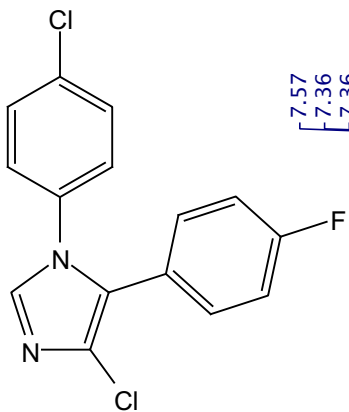

Compound 76

7.57  
7.36  
7.36  
7.35  
7.34  
7.34  
7.33  
7.26 CDCl3  
7.18  
7.18  
7.17  
7.17  
7.16  
7.16  
7.15  
7.14  
7.14  
7.06  
7.06  
7.05  
7.04  
7.04  
7.03  
7.03  
7.03  
7.02  
7.01  
7.01  
7.01  
7.00  
6.99  
6.98

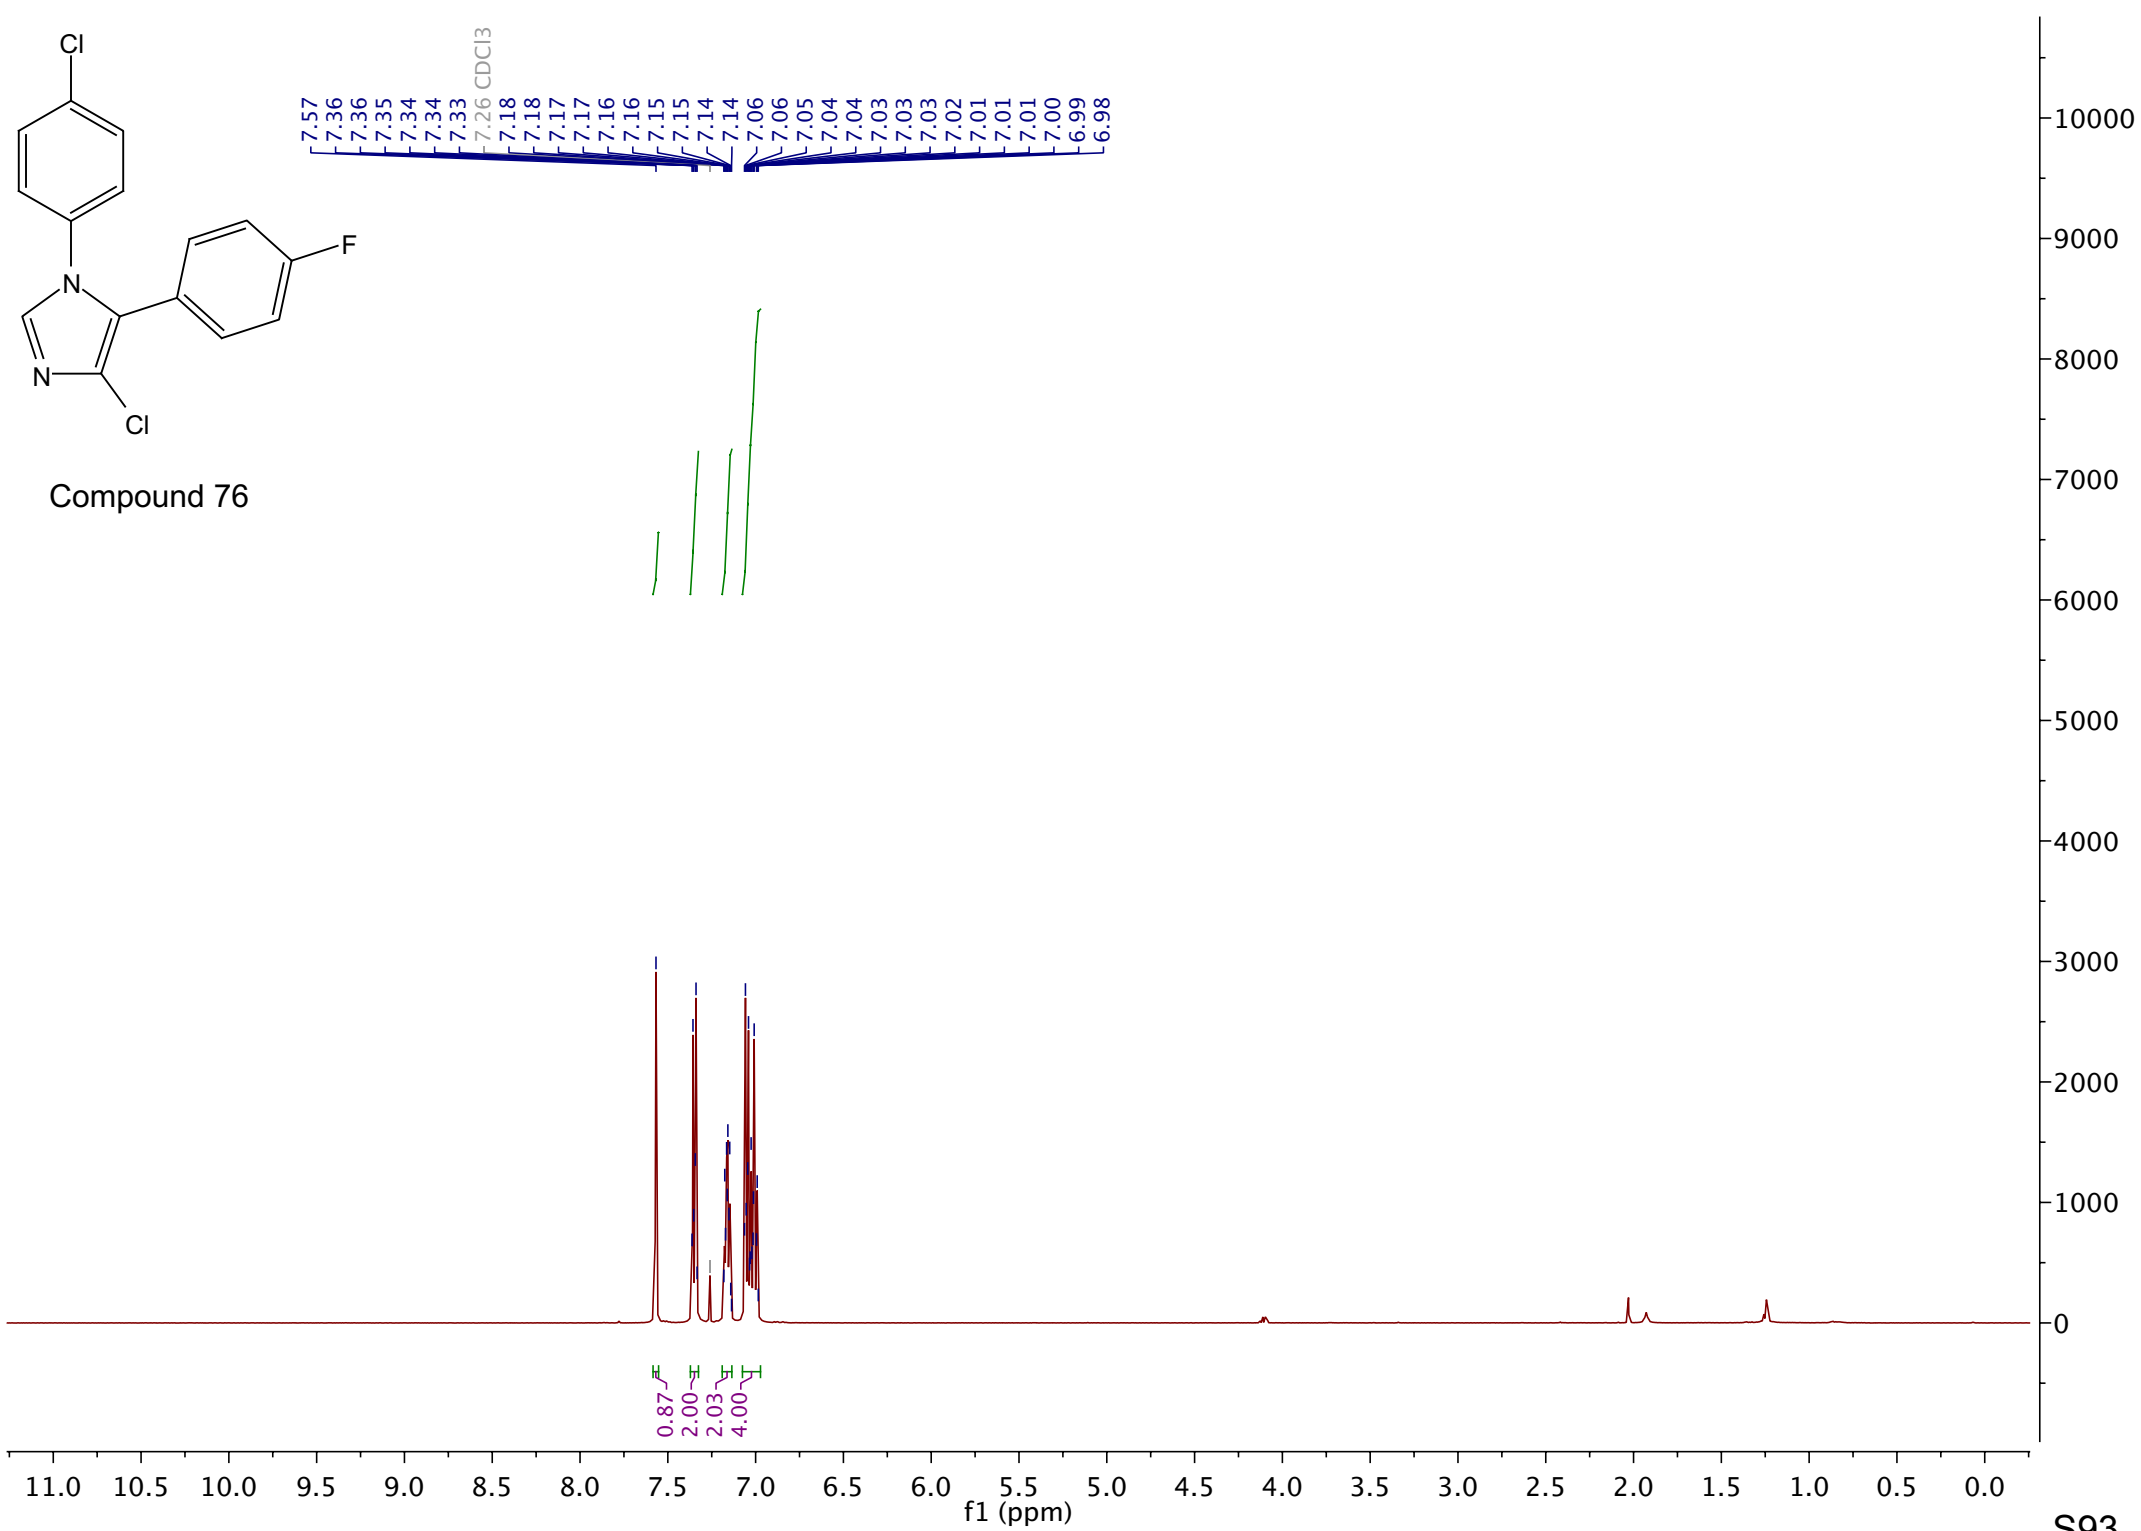

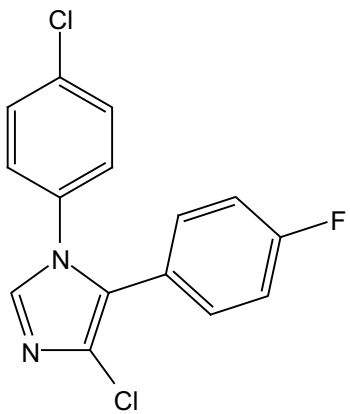

Compound 76

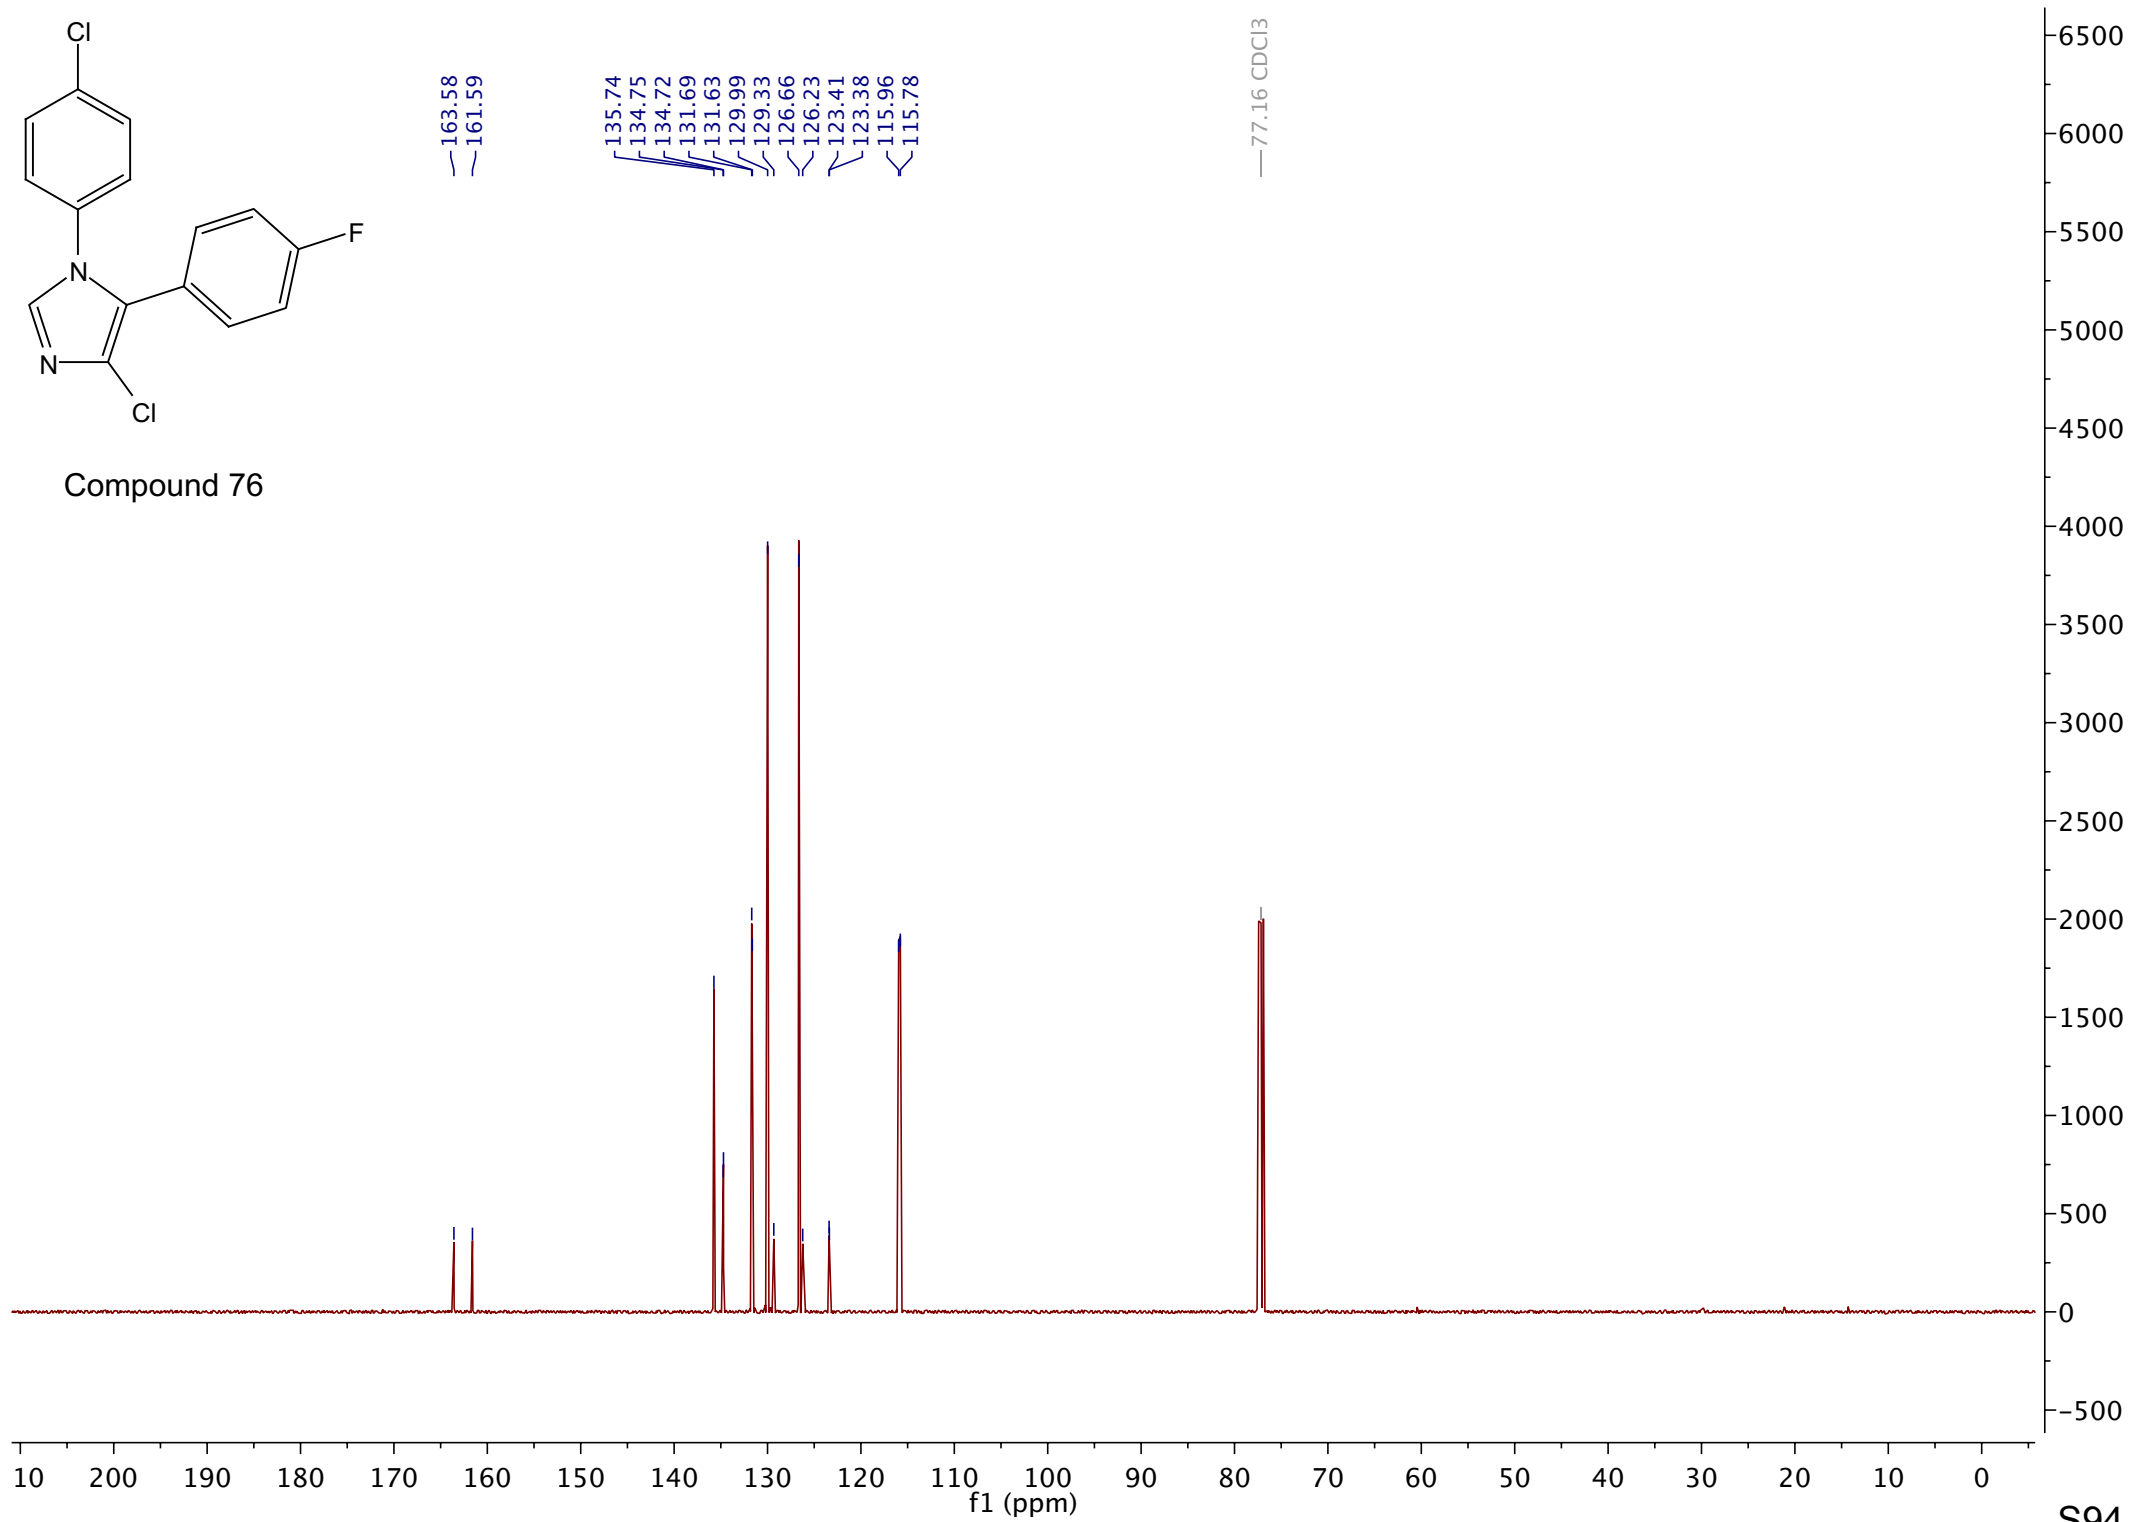

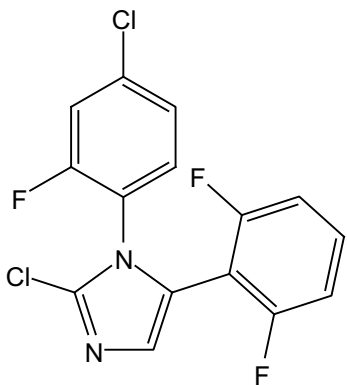

Compound 77

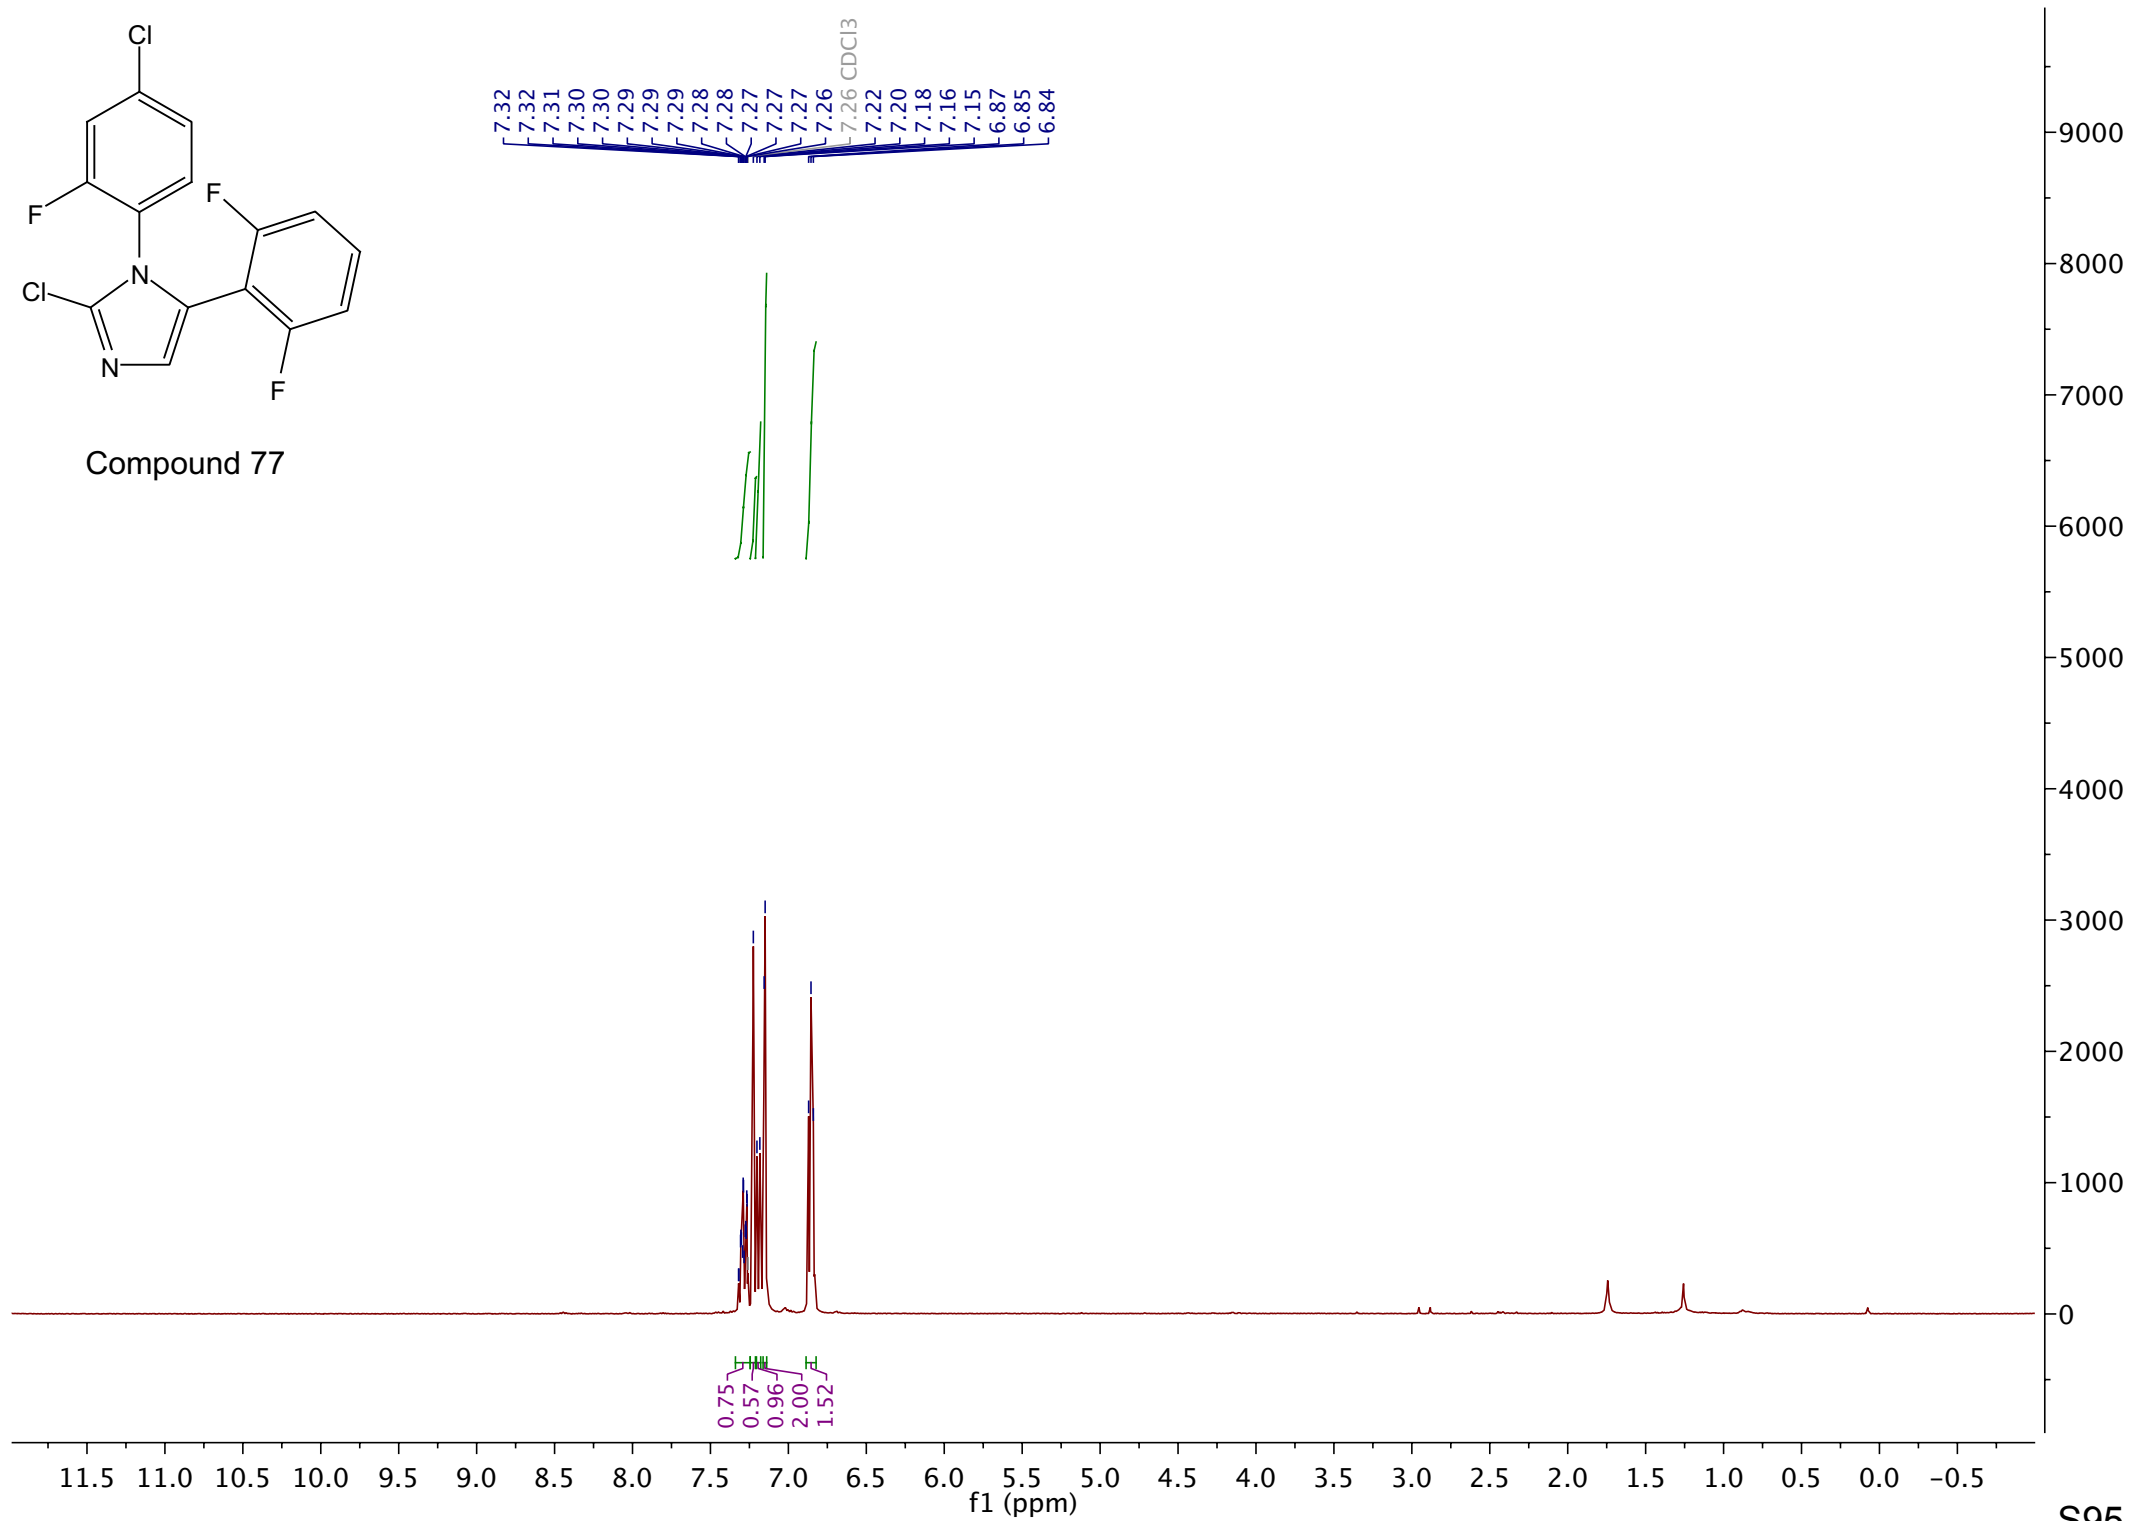

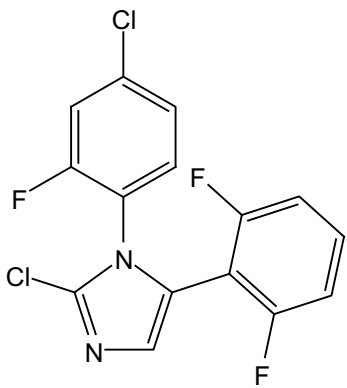

Compound 77

- 161.62
- 161.58
- 159.62
- 159.57
- 158.40
- 156.35
- 136.82
- 136.74
- 134.86
- 131.61
- 131.52
- 131.44
- 130.79
- 130.32
- 125.13
- 125.10
- 122.95
- 121.79
- 121.69
- 117.82
- 117.64
- 111.79
- 111.75
- 111.63
- 106.65
- 106.50
- 106.34

77.16 CDCl3

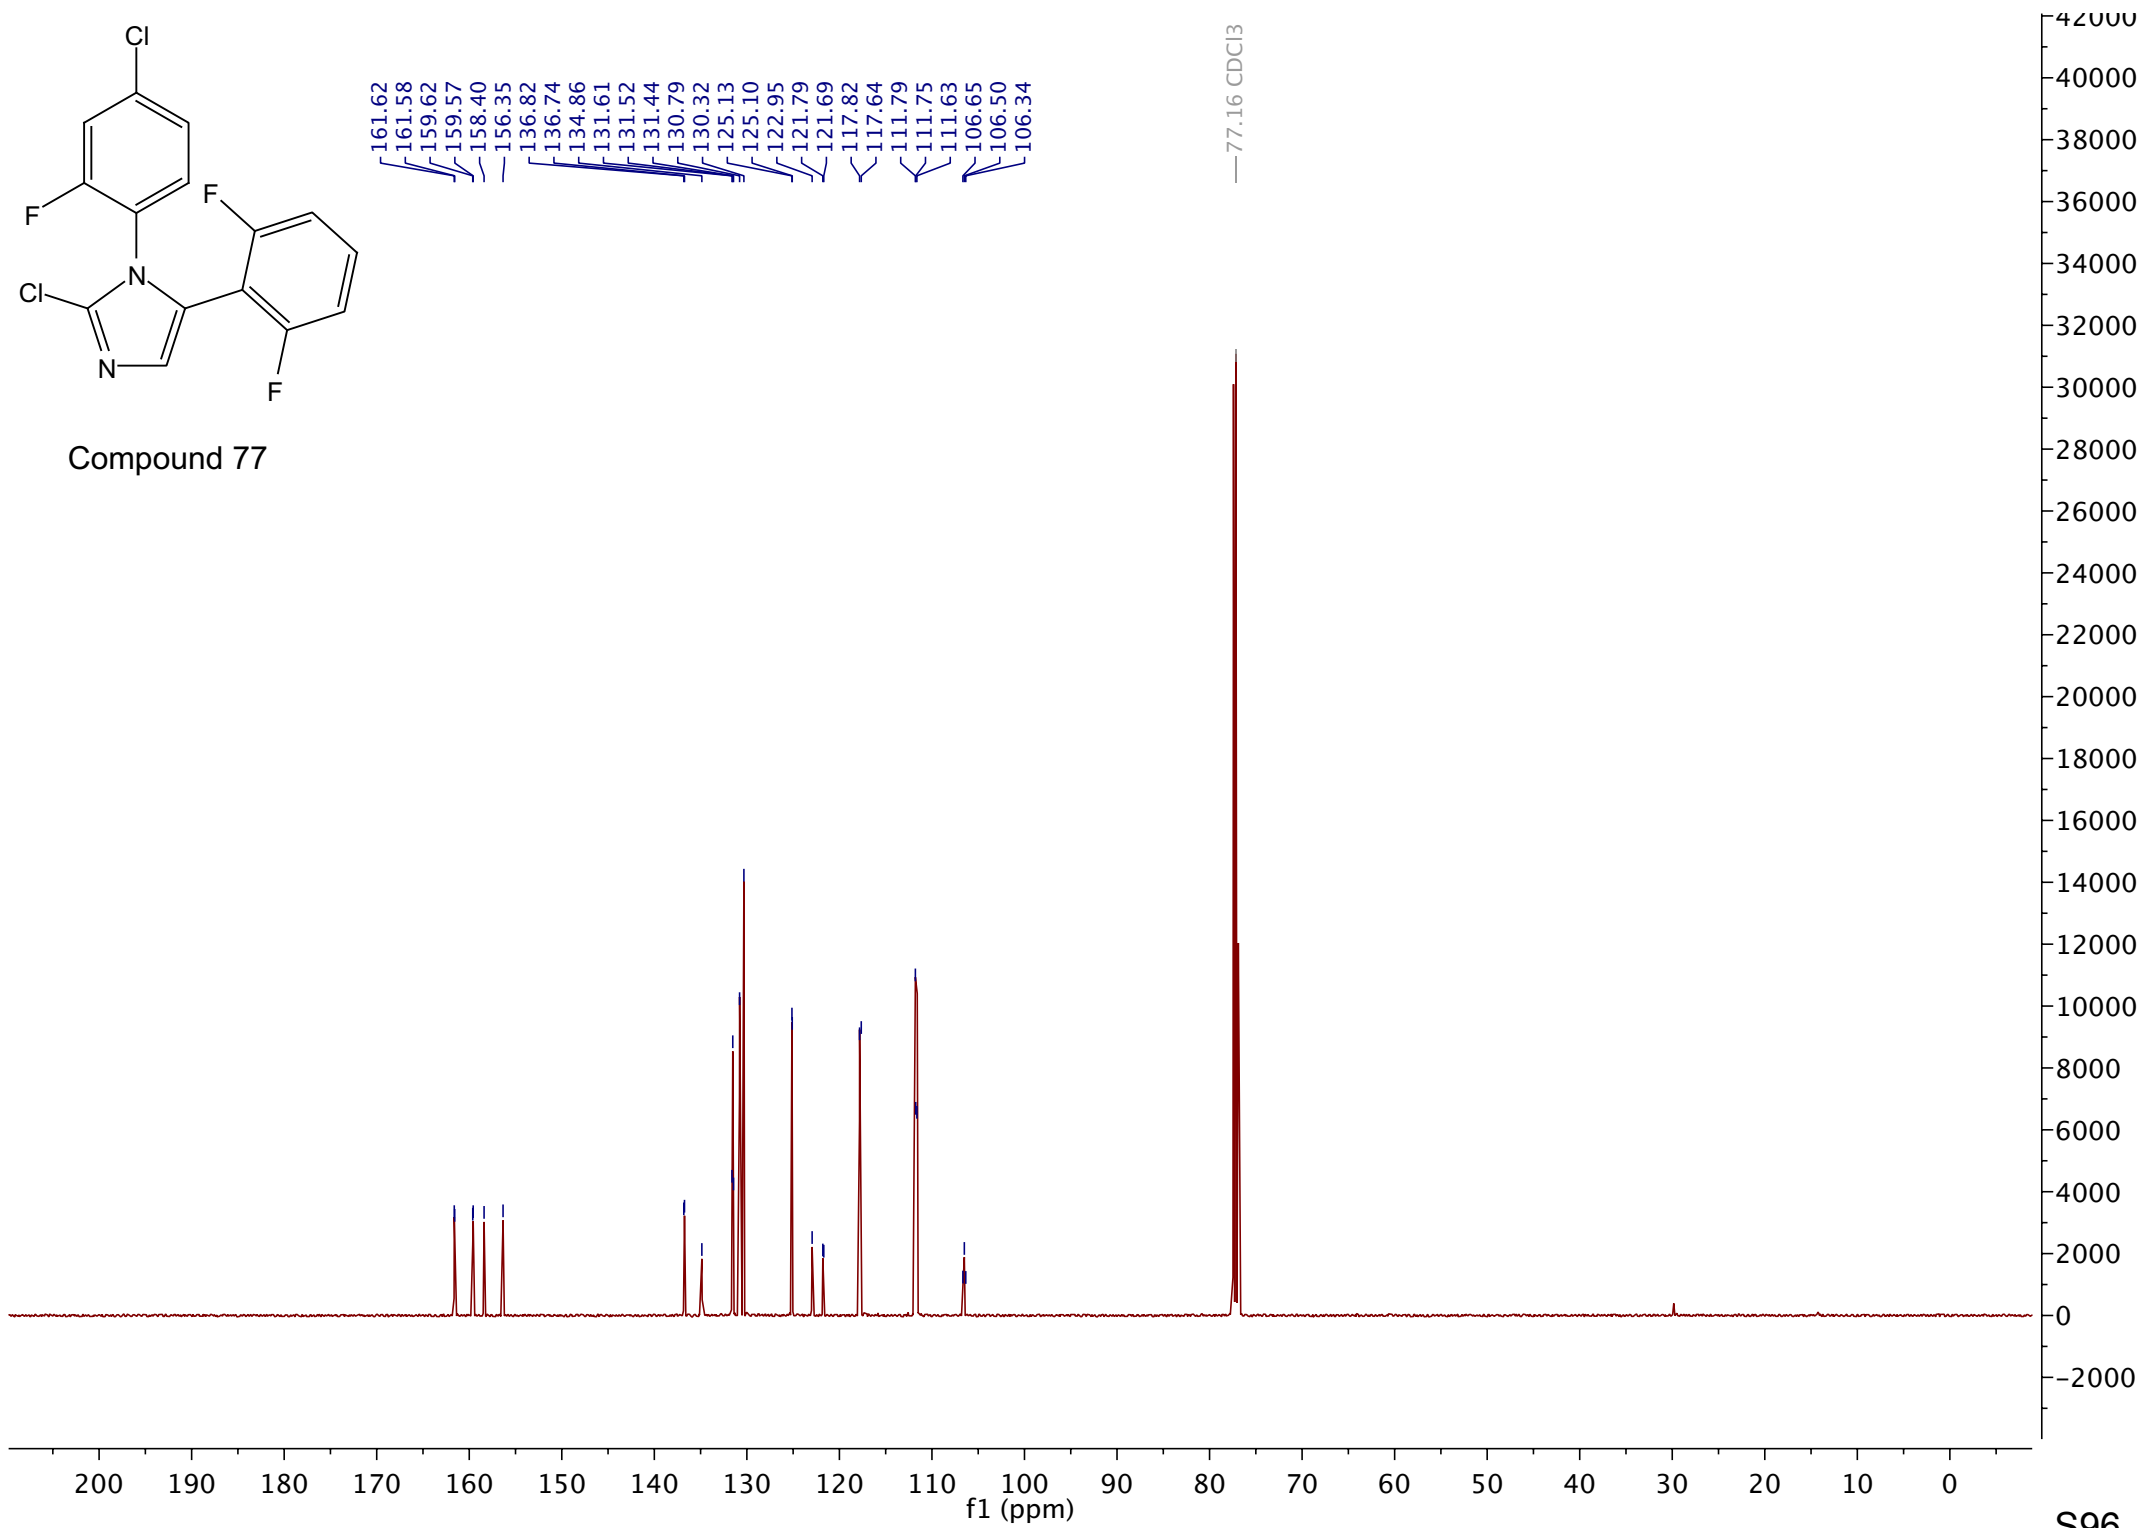



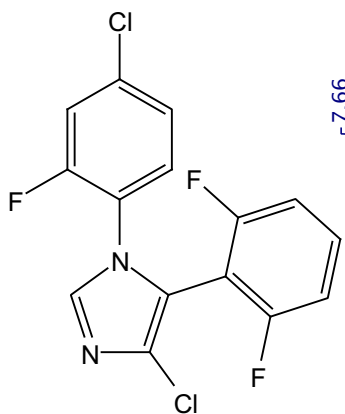

Compound 78

7.66  
7.65  
7.65  
7.39  
7.37  
7.37  
7.37  
7.36  
7.36  
7.36  
7.35  
7.34  
7.34  
7.33  
7.26 CDCl<sub>3</sub>  
7.19  
7.19  
7.18  
7.17  
7.17  
7.15  
7.14  
7.13  
7.11  
6.91  
6.88

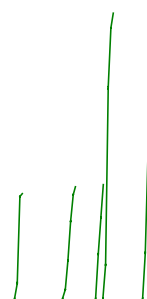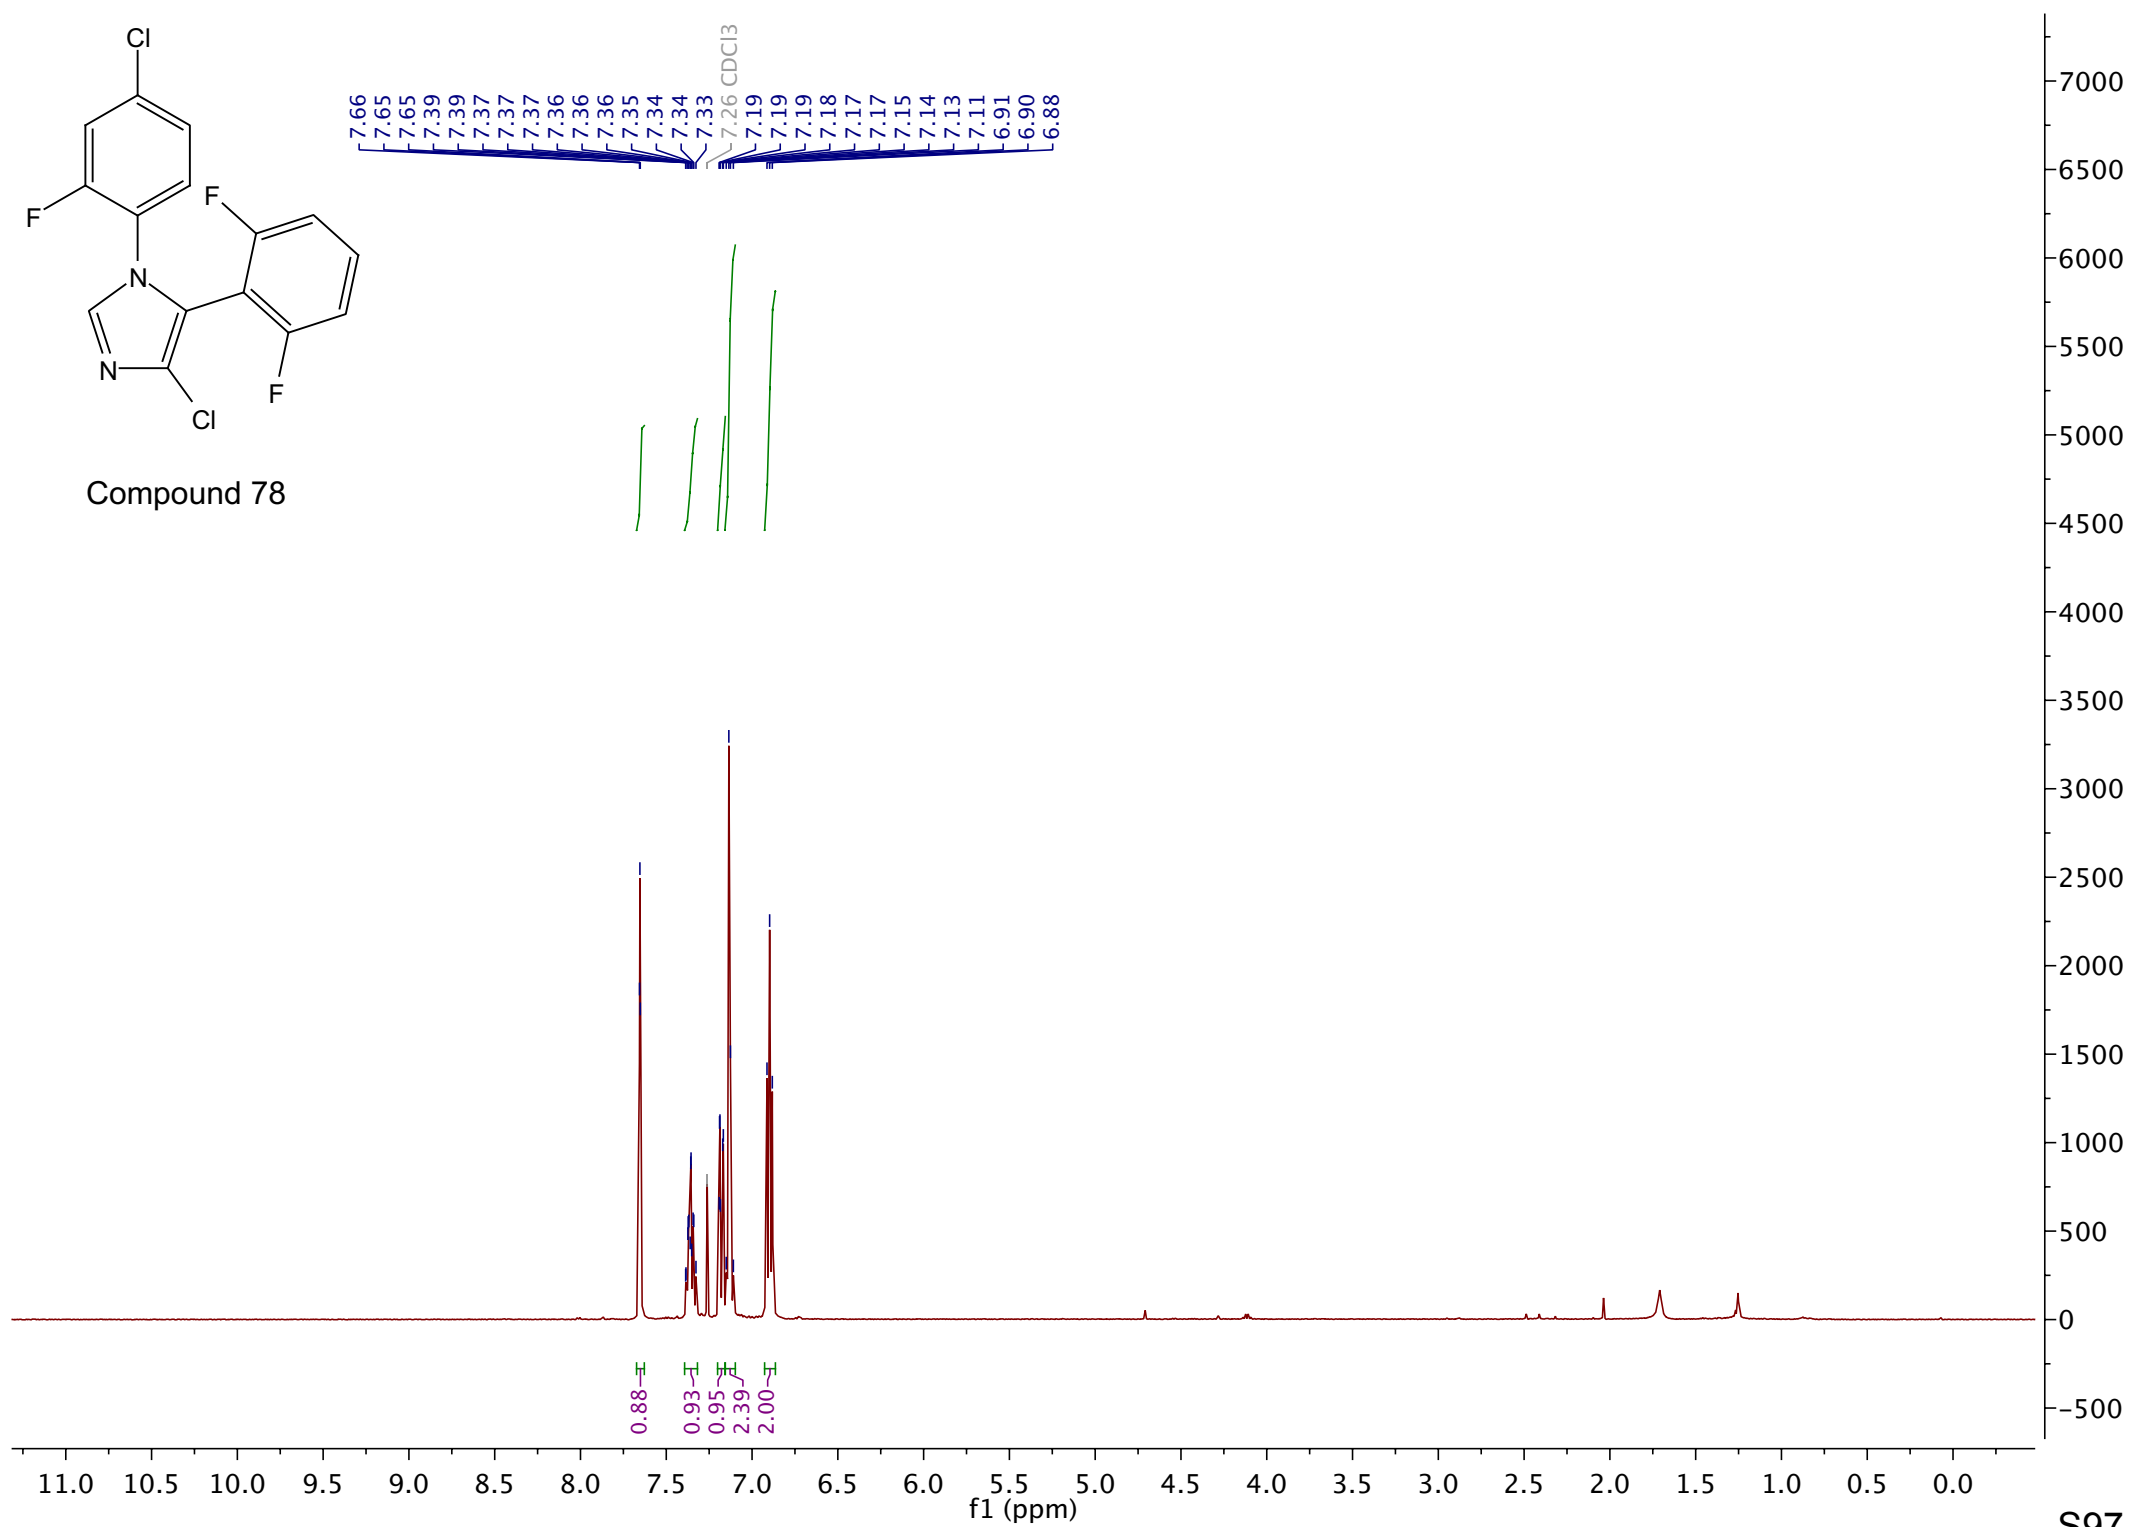

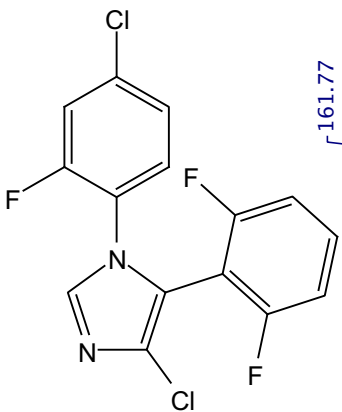

Compound 78

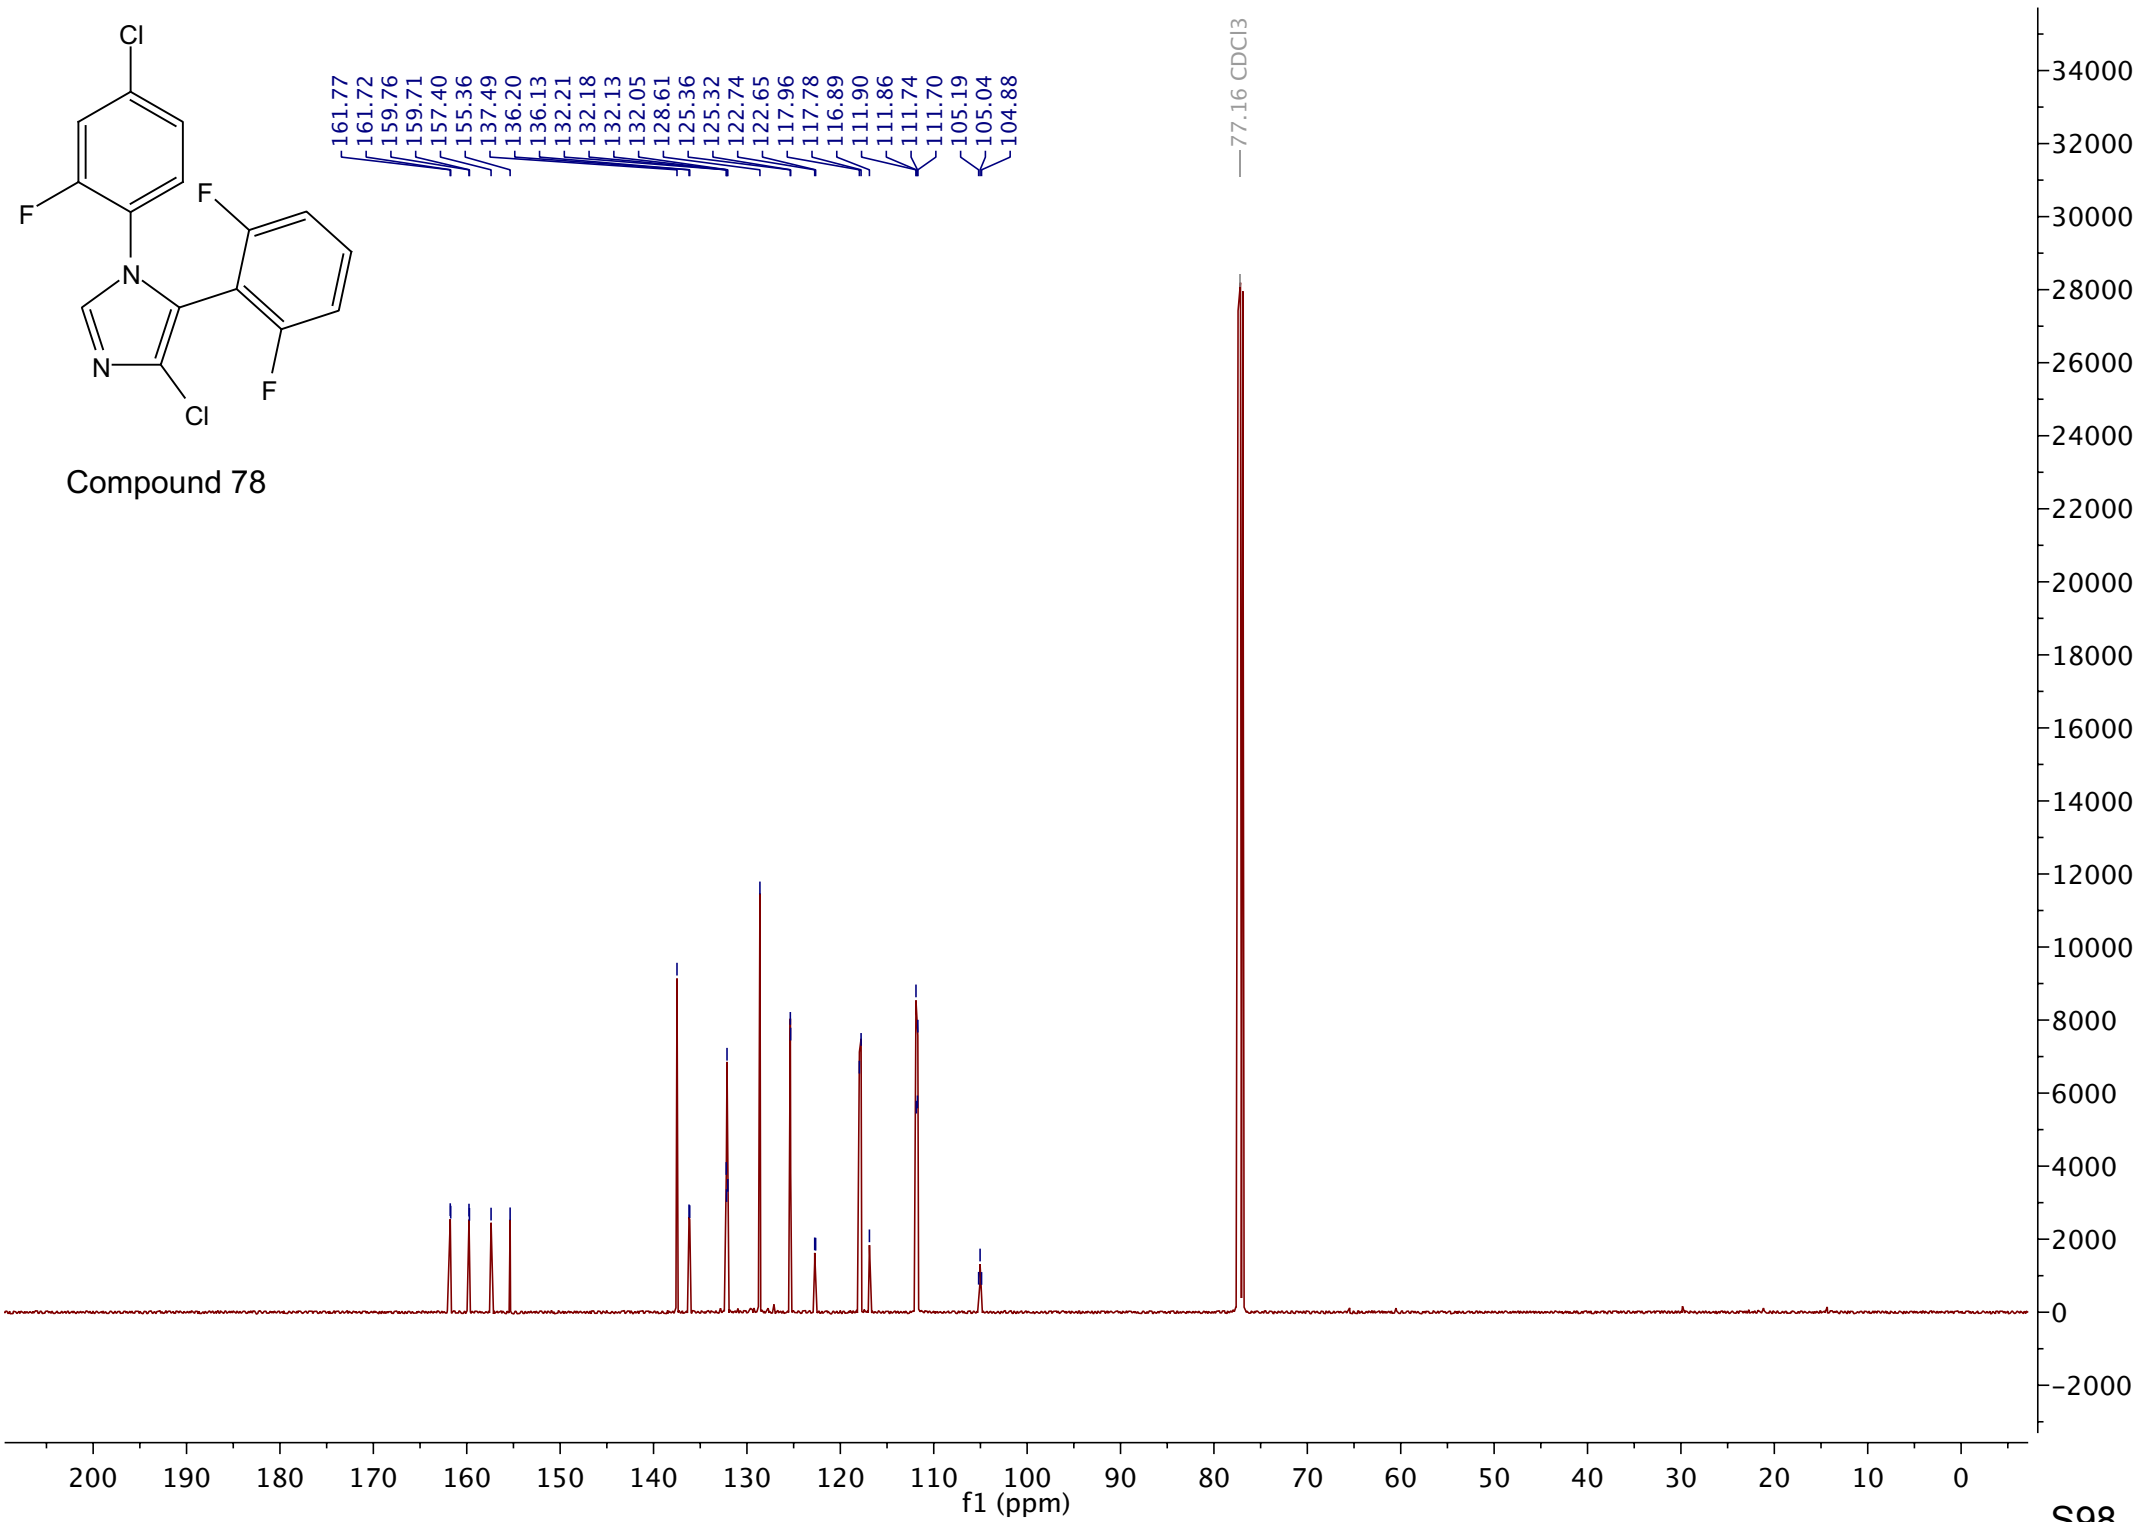

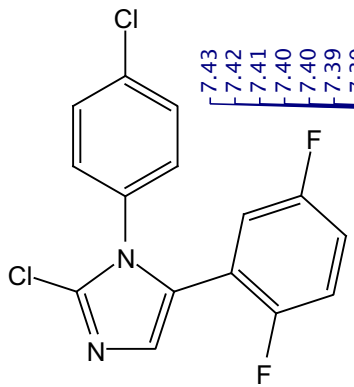

Compound 79

7.43  
7.42  
7.41  
7.40  
7.39  
7.38  
7.38  
7.26 CDCl<sub>3</sub>  
7.22  
7.15  
7.14  
7.14  
7.13  
7.13  
7.12  
6.99  
6.98  
6.97  
6.97  
6.97  
6.96  
6.96  
6.96  
6.95  
6.95  
6.94  
6.94  
6.93  
6.81  
6.80  
6.80  
6.79  
6.78  
6.78  
6.77

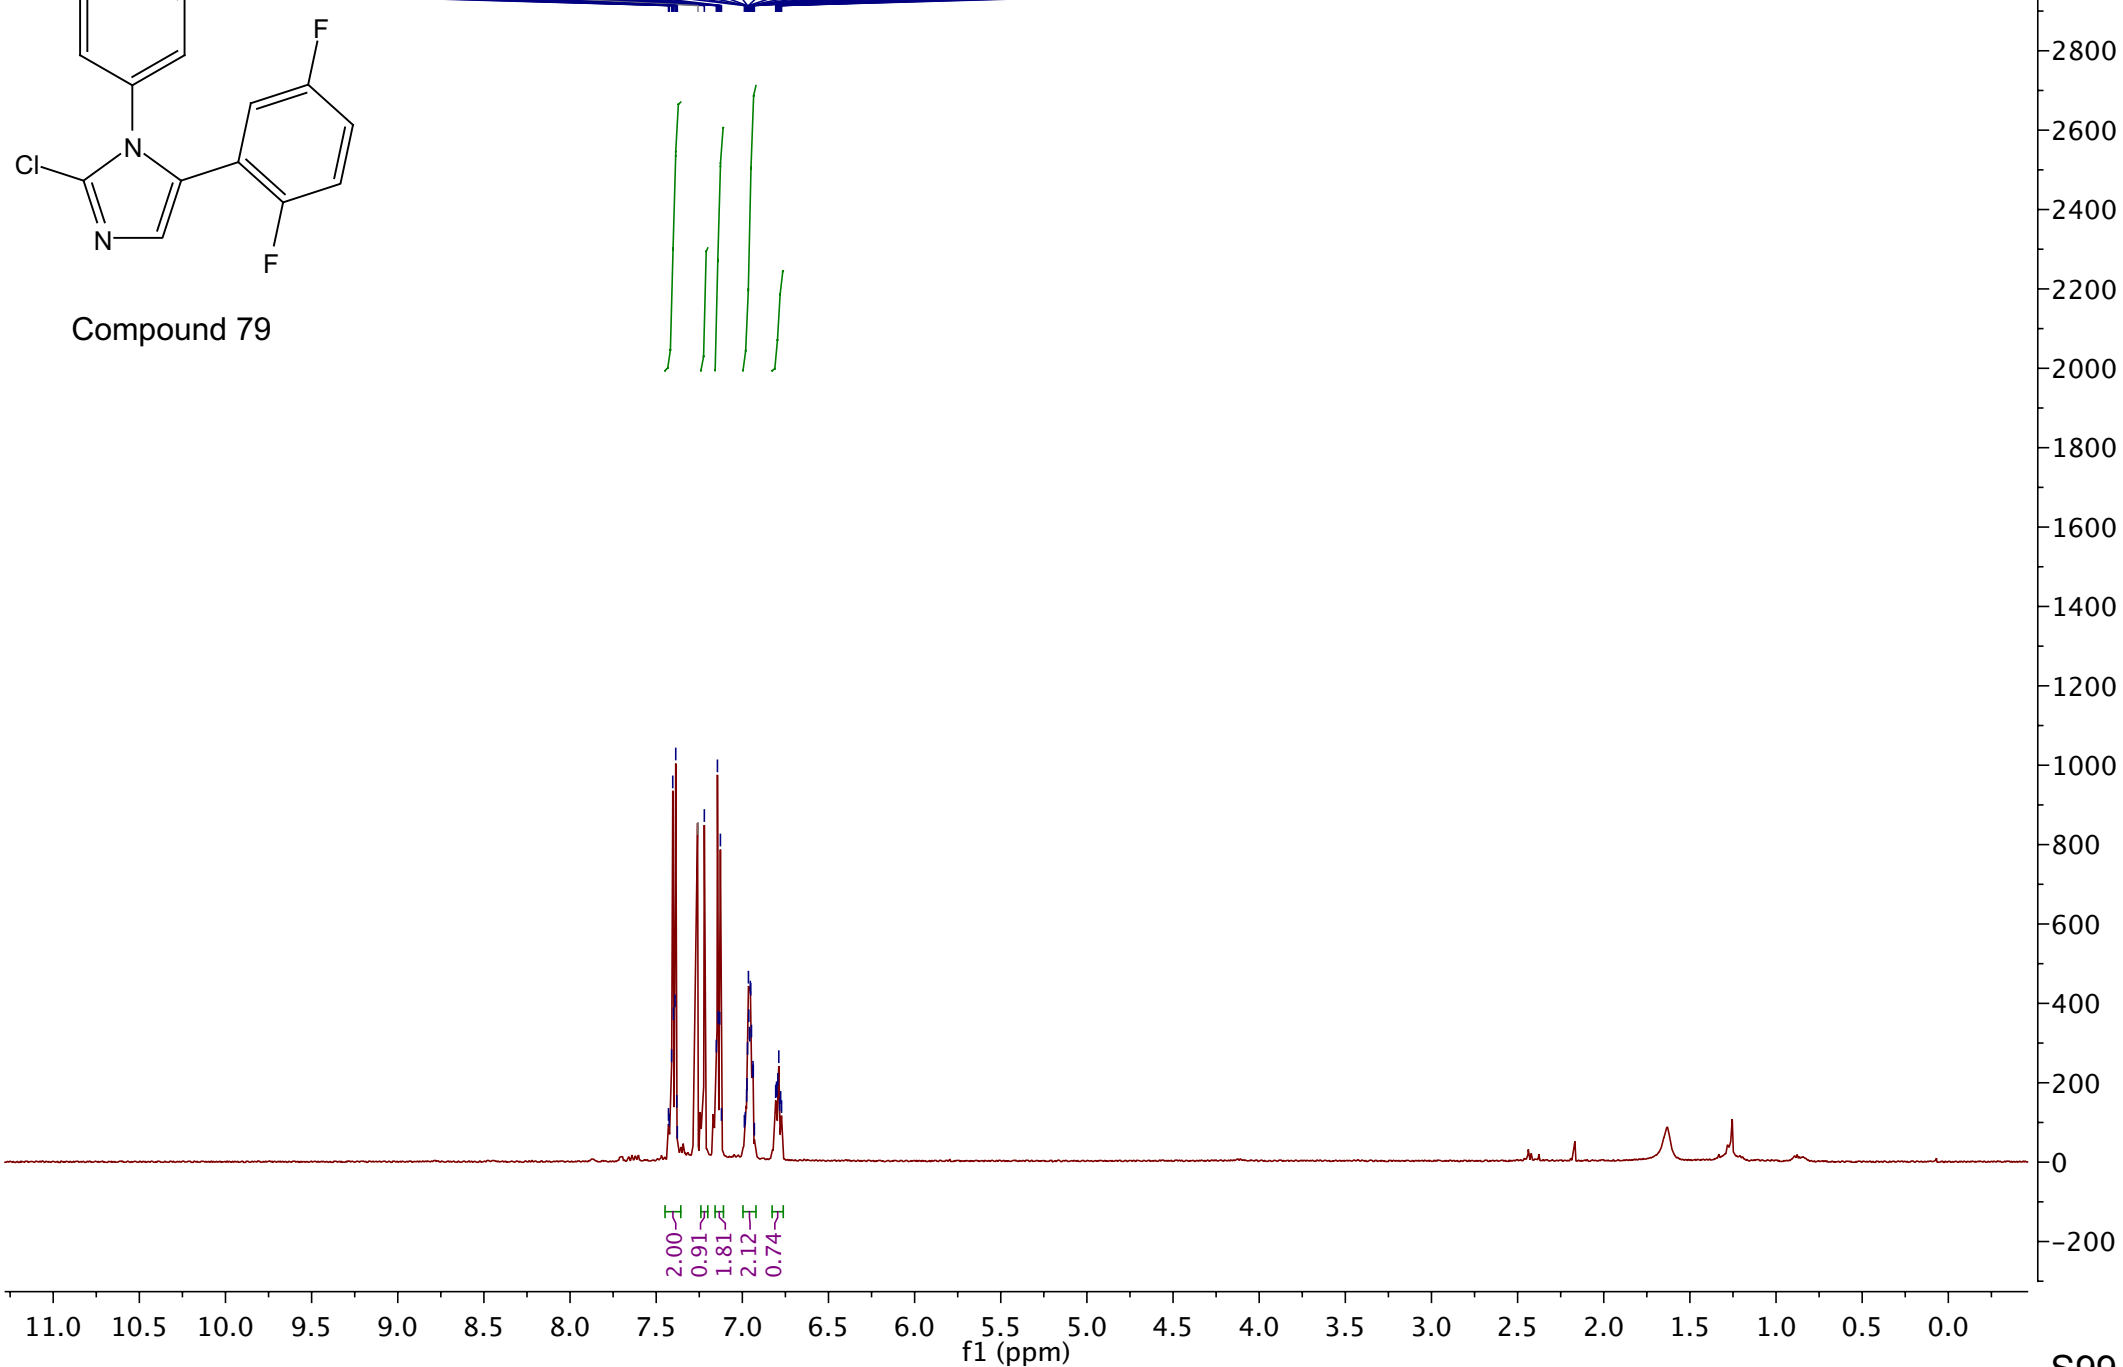

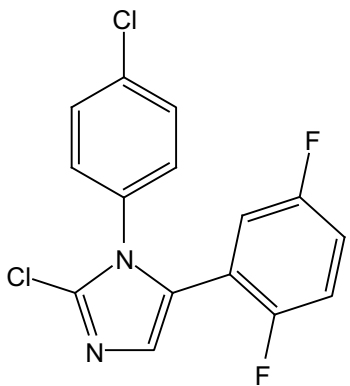

Compound 79

159.38  
159.35  
157.43  
157.39  
156.71  
156.68  
154.75  
154.72  
135.57  
134.62  
133.73  
129.79  
129.69  
129.67  
128.88  
128.49  
118.54  
118.45  
118.41  
118.33  
117.45  
117.42  
117.33  
117.26  
117.25  
117.23  
117.16  
117.09  
116.98  
116.91

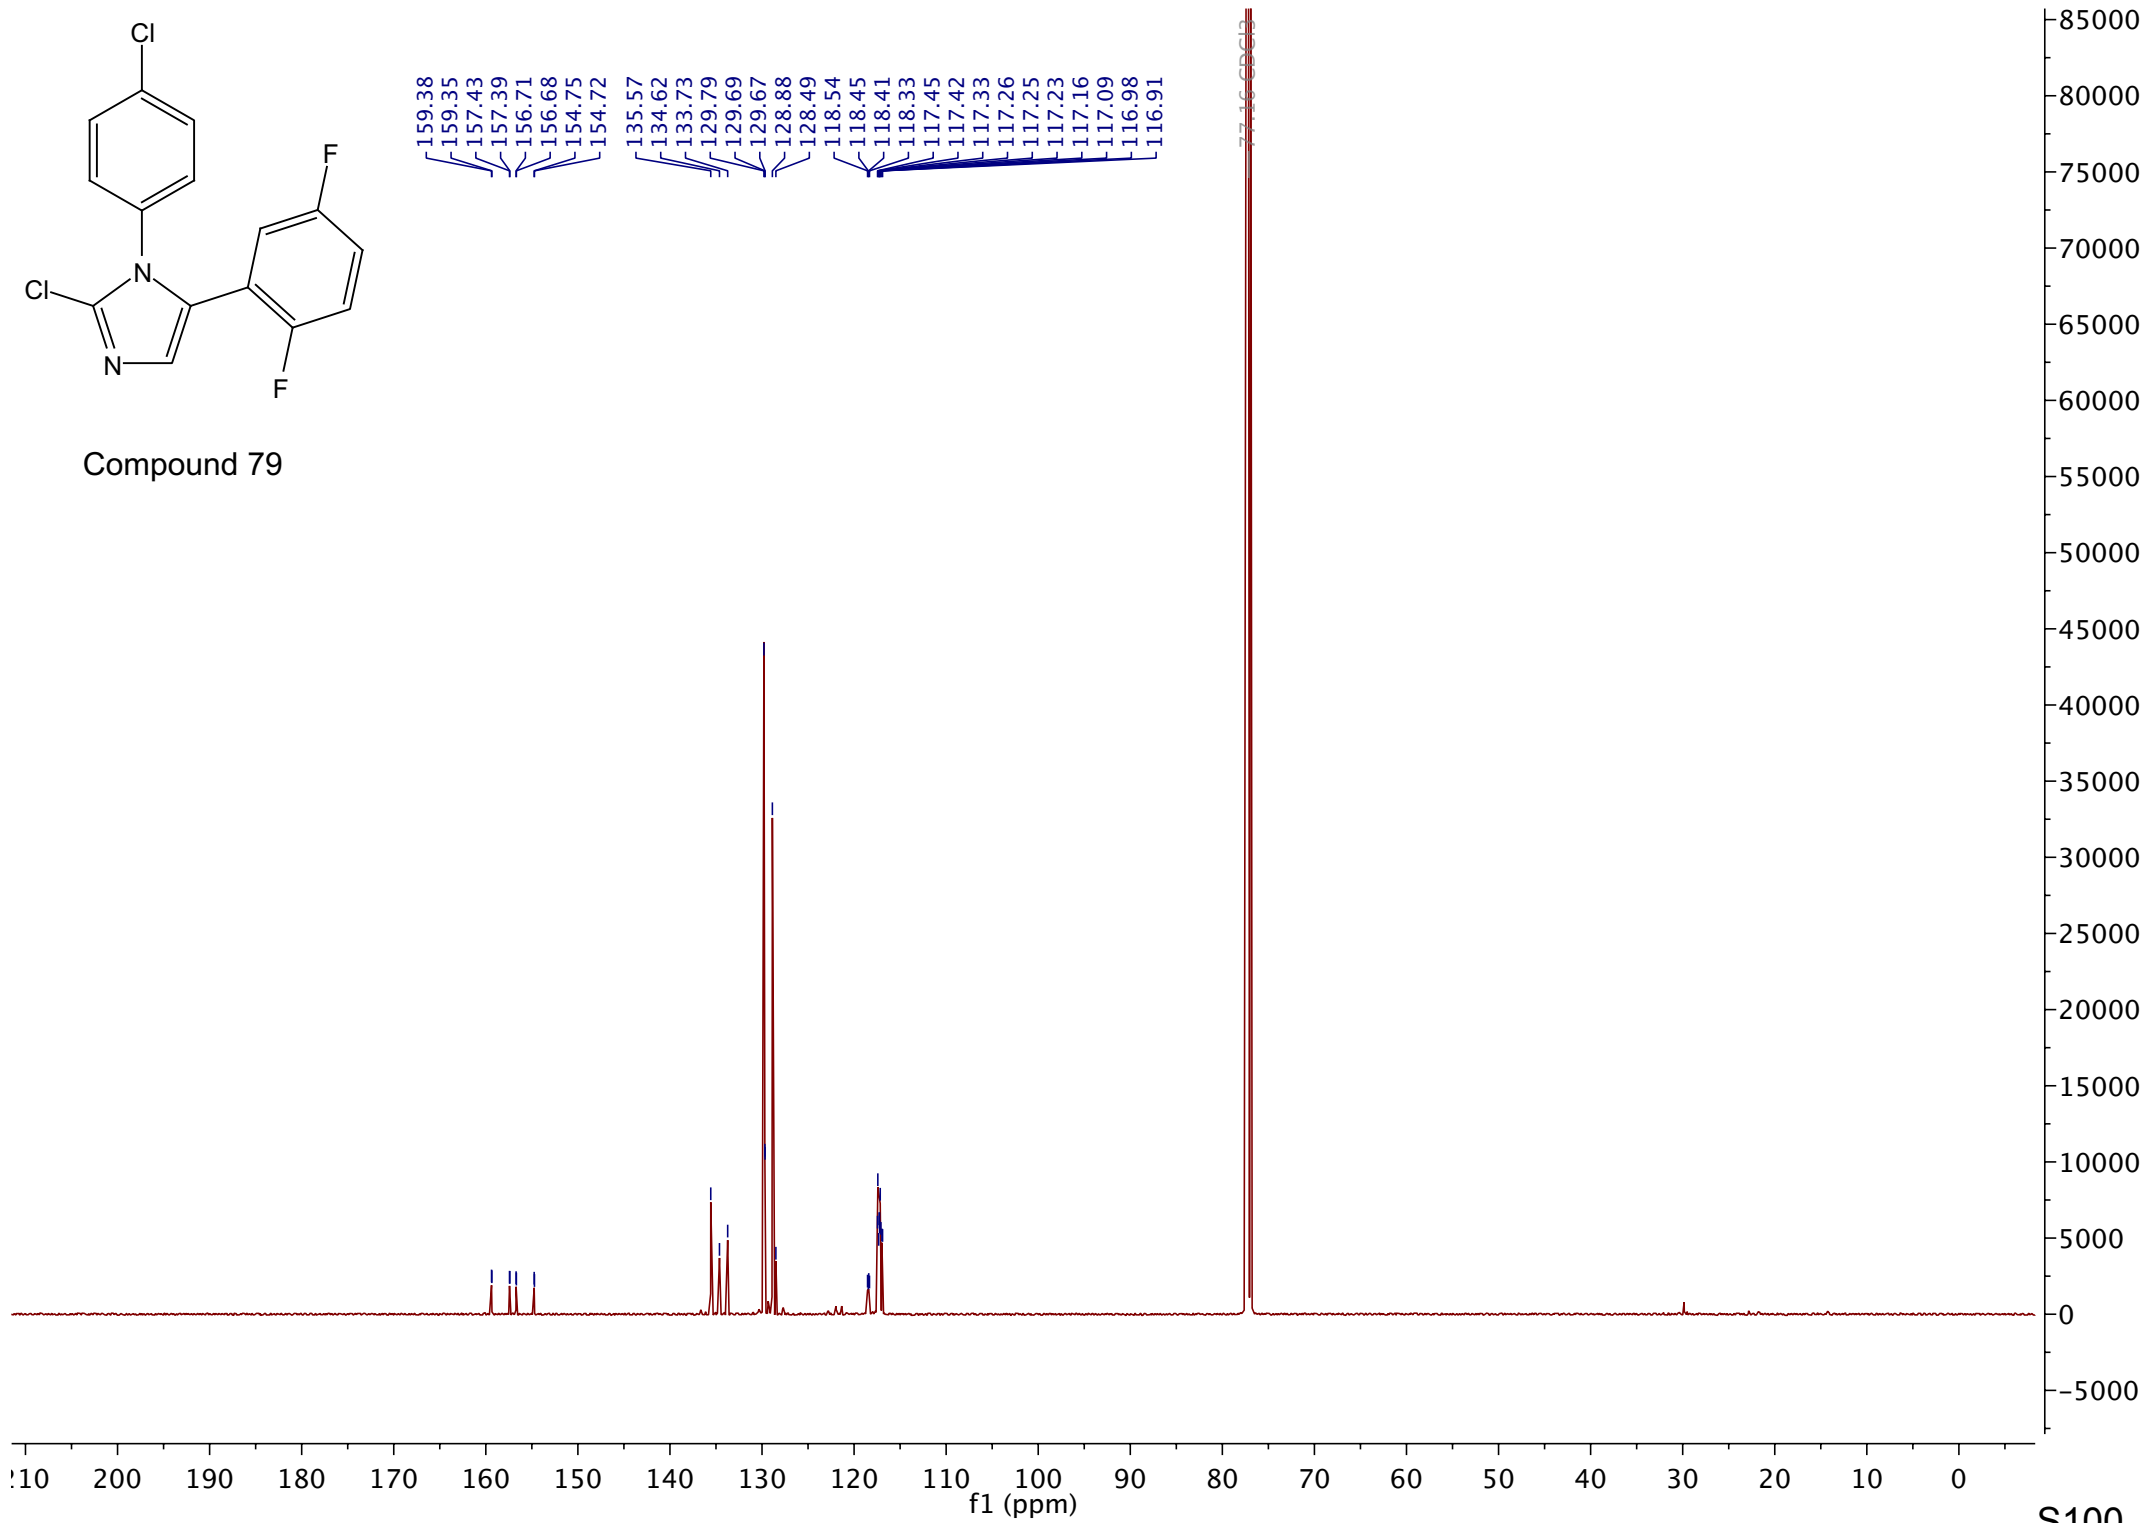

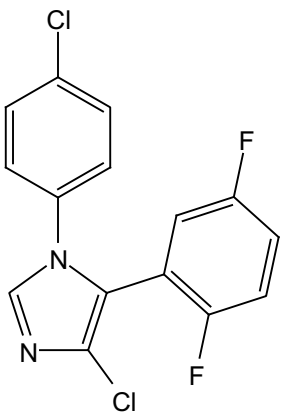

Compound 80

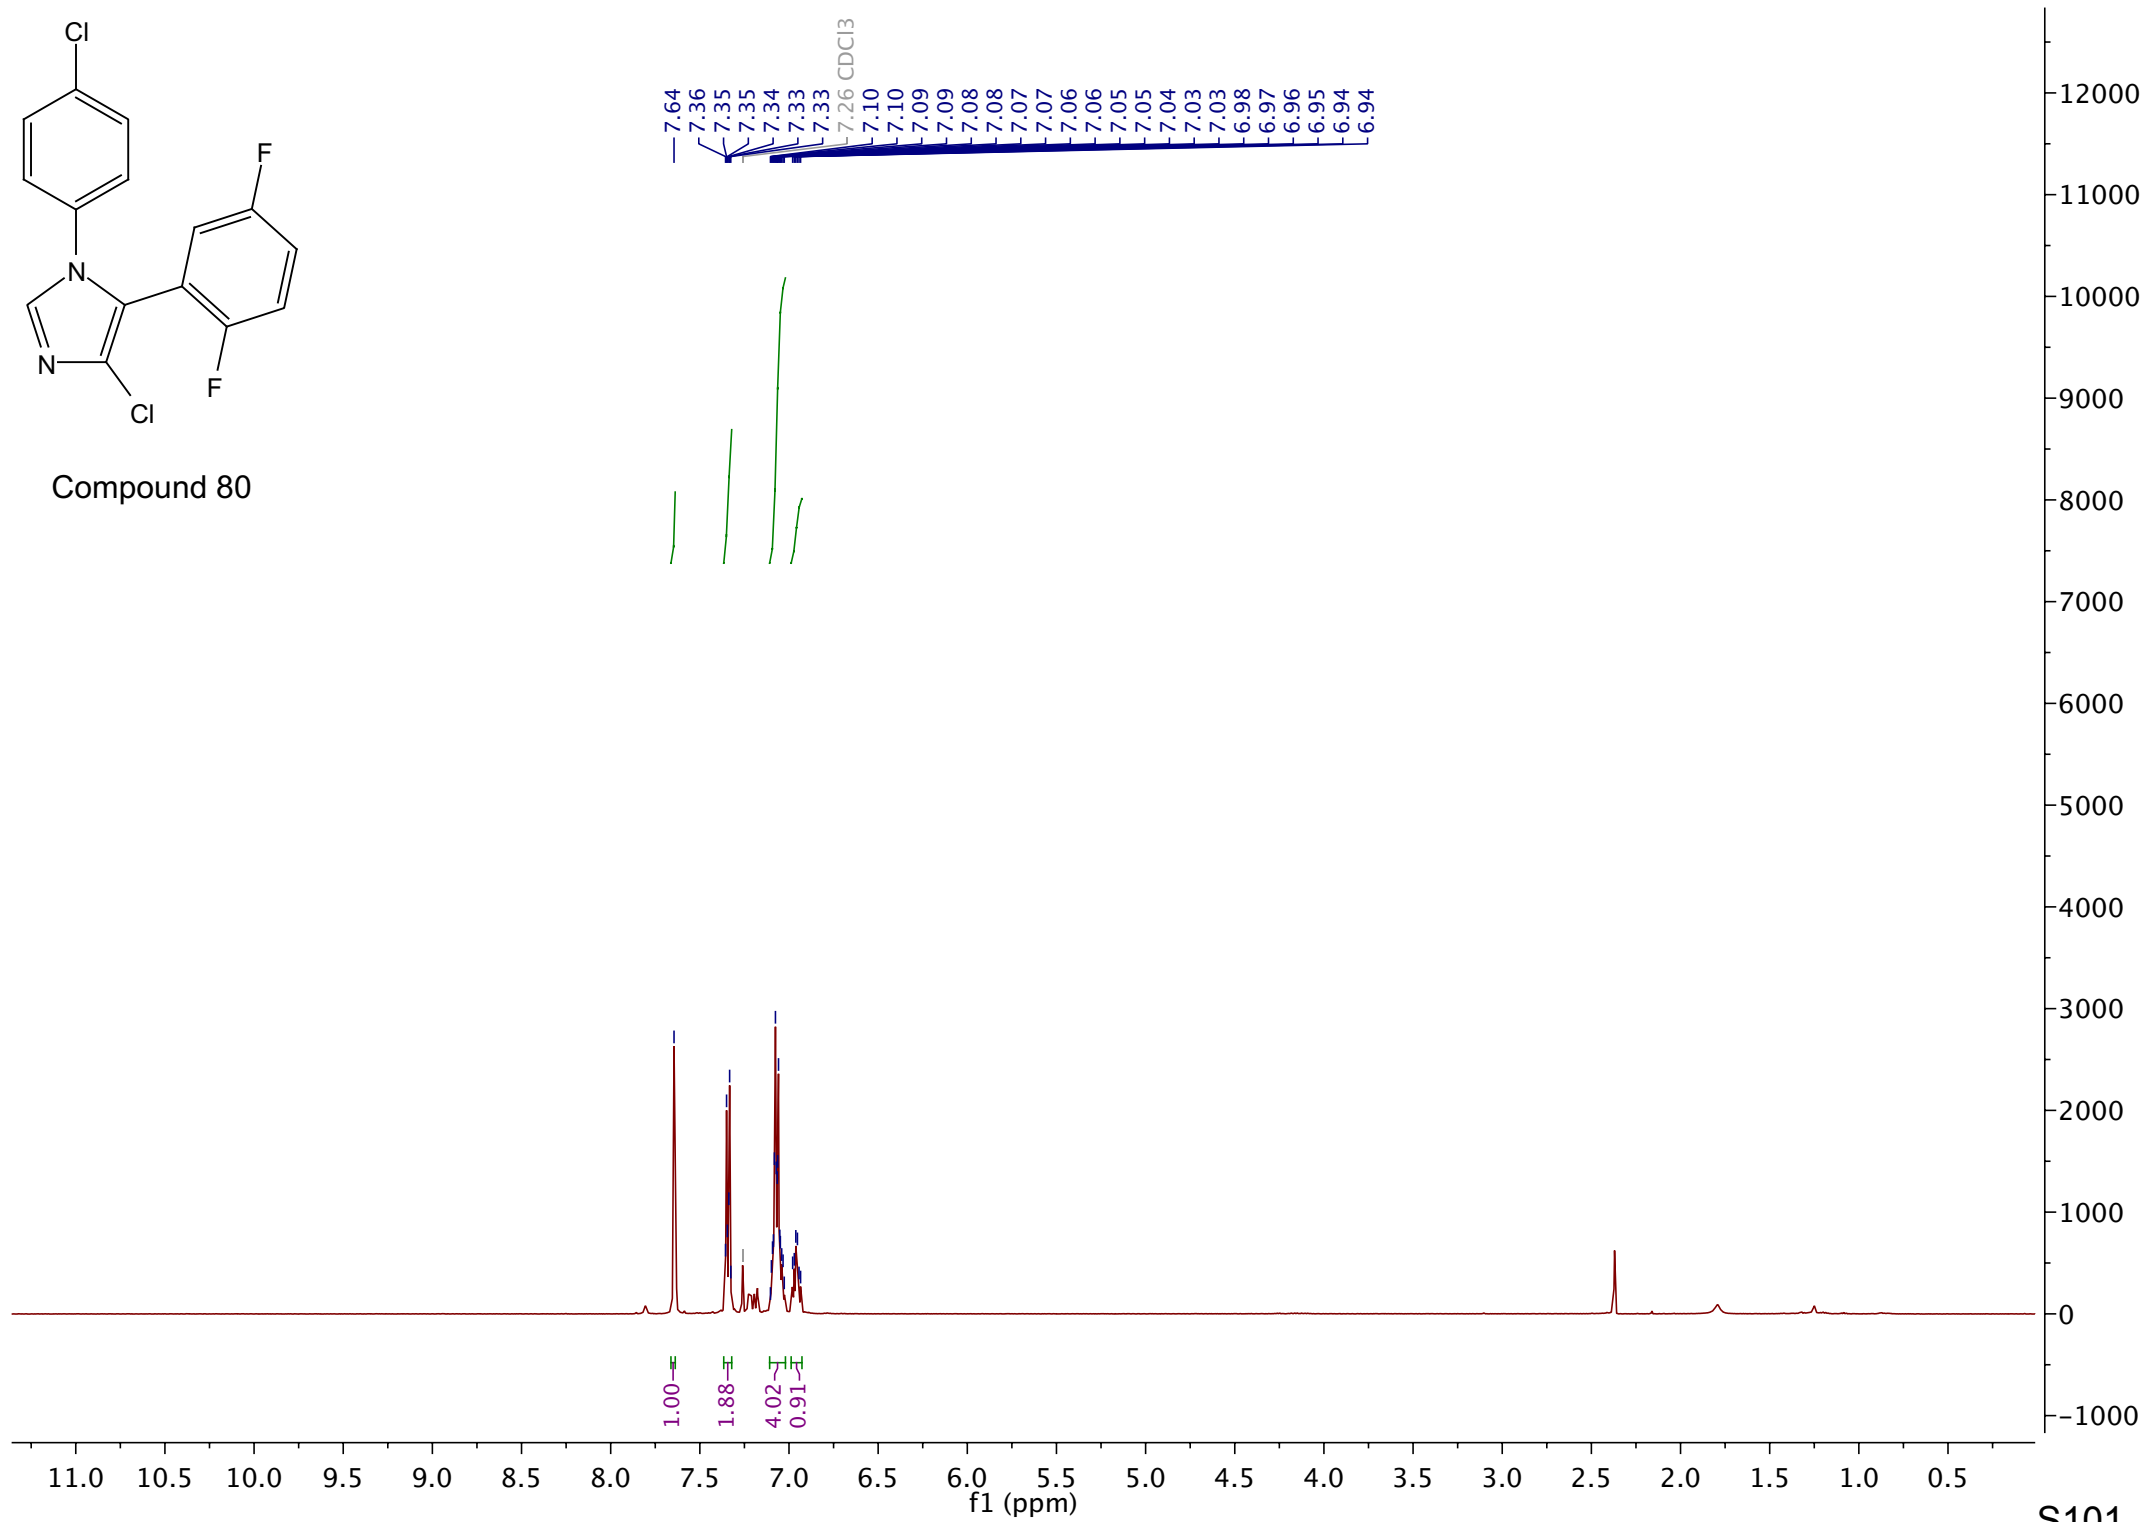

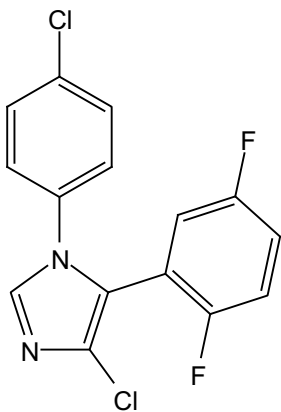

Compound 80

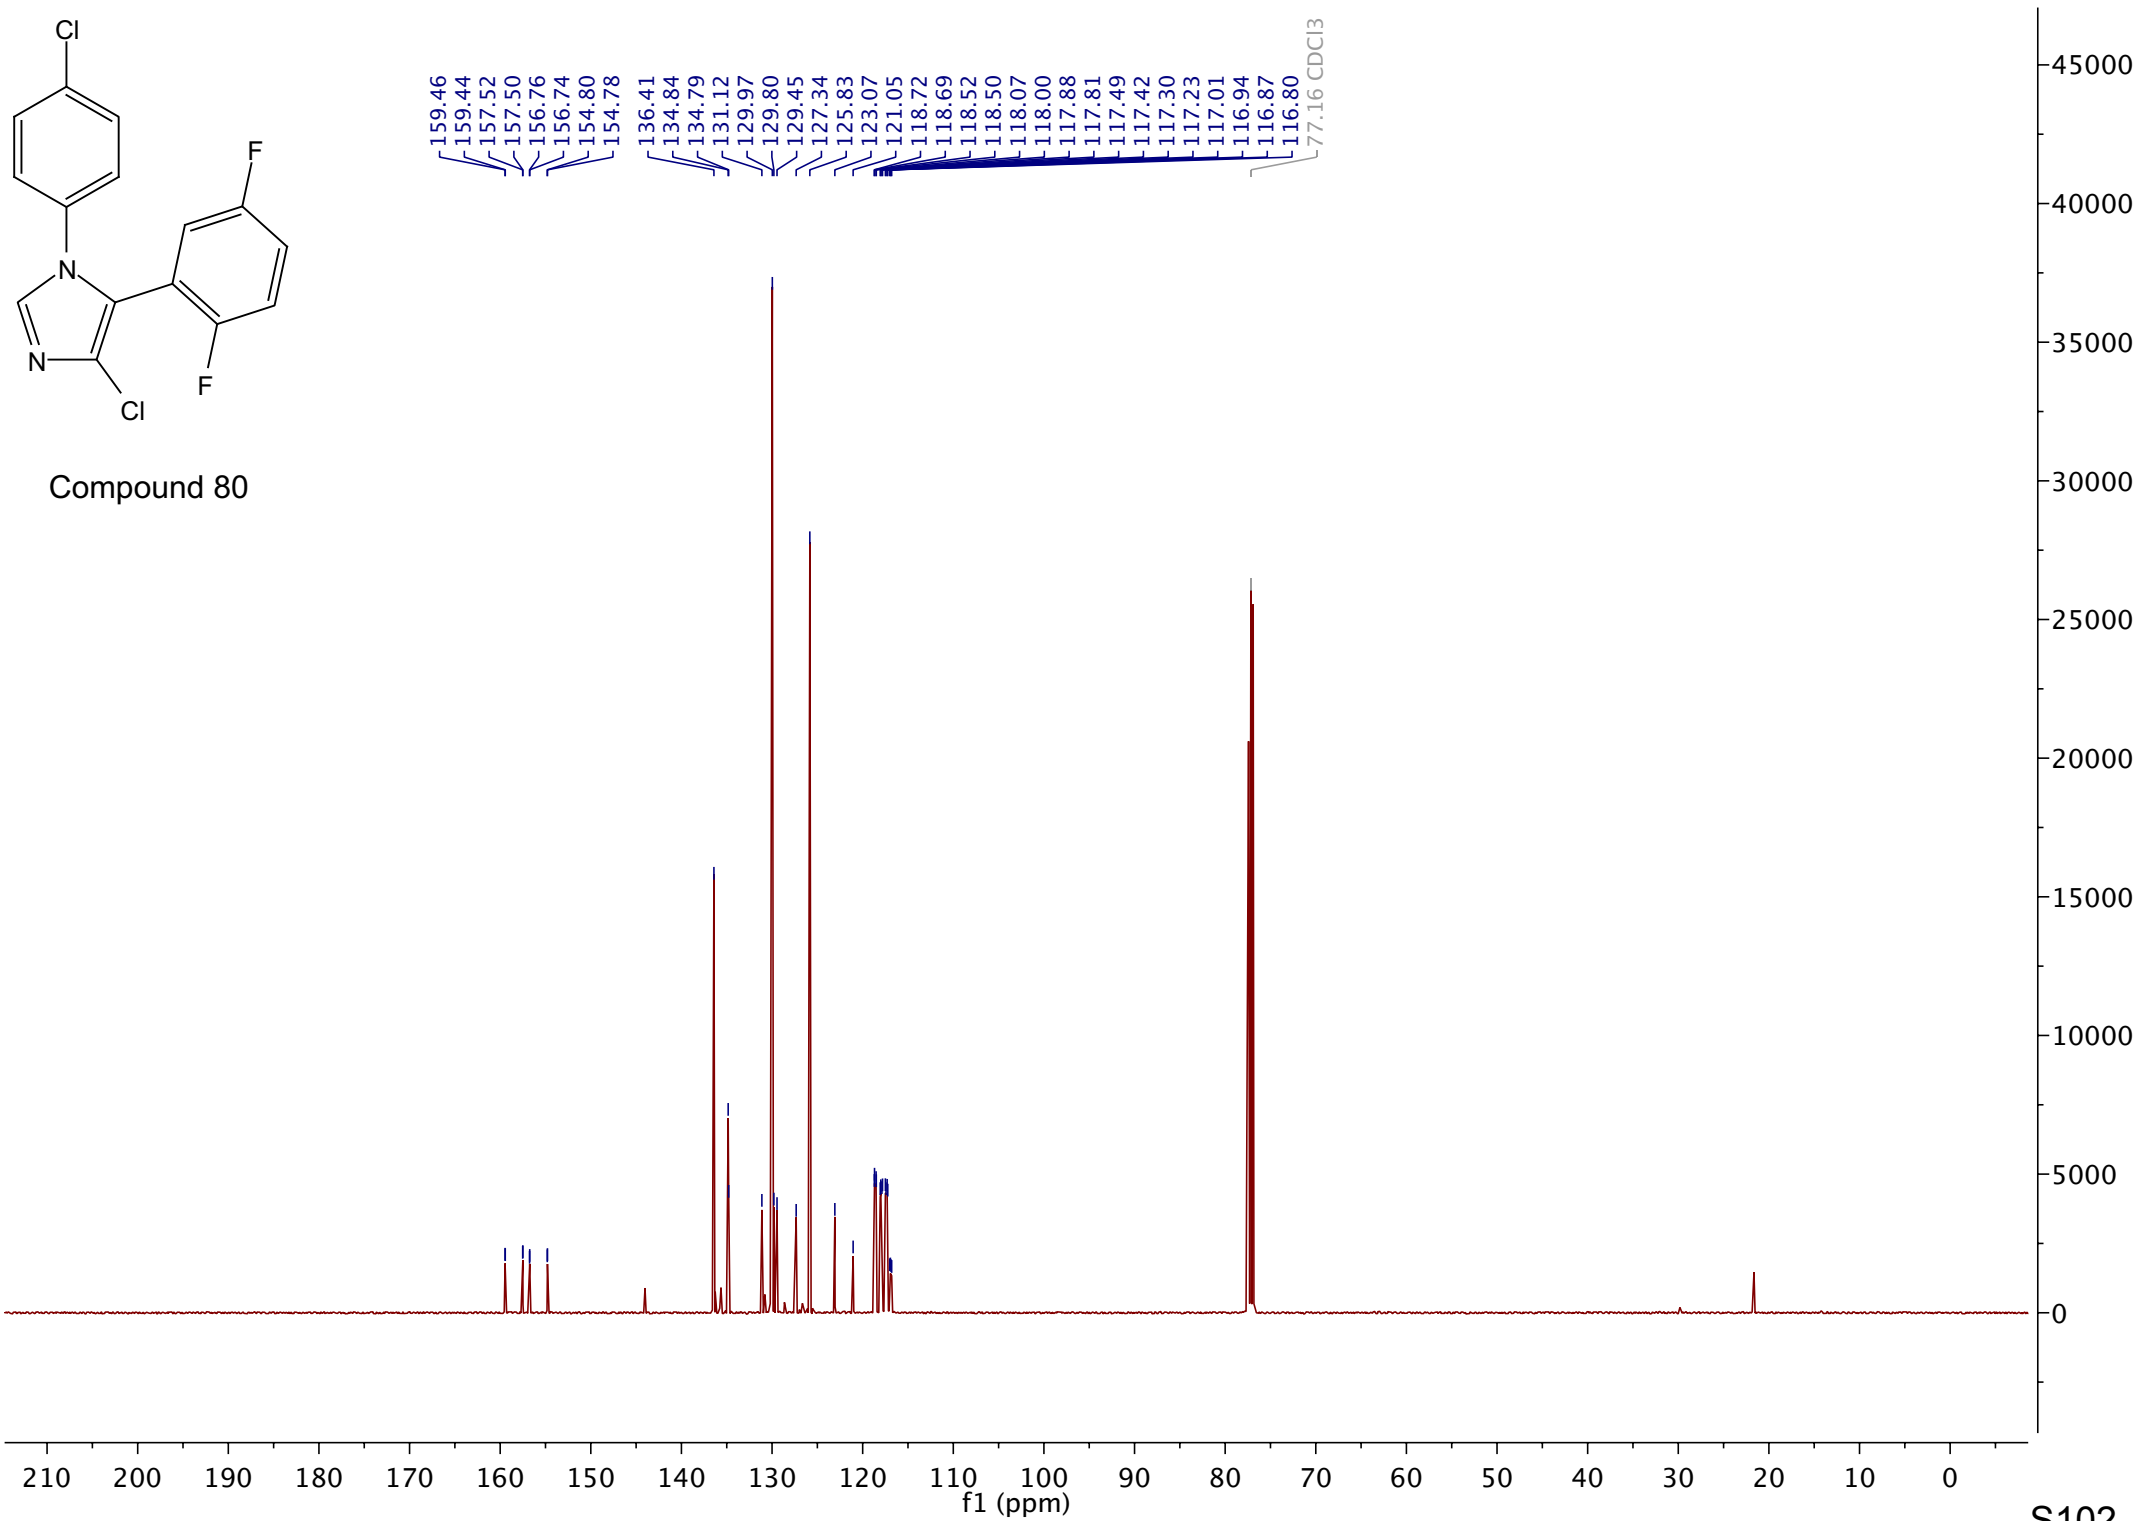

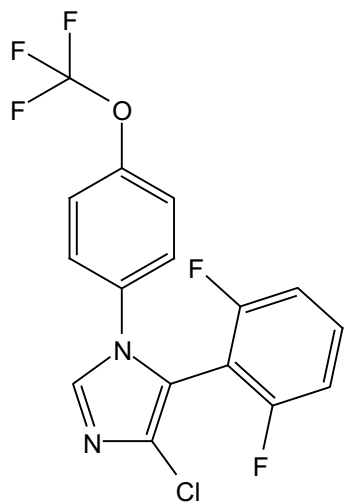

Compound 81

7.70  
7.41  
7.39  
7.39  
7.38  
7.38  
7.37  
7.36  
7.36  
7.35  
7.26 CDCl3  
7.22  
7.20  
7.20  
7.18  
7.18  
6.93  
6.92  
6.90

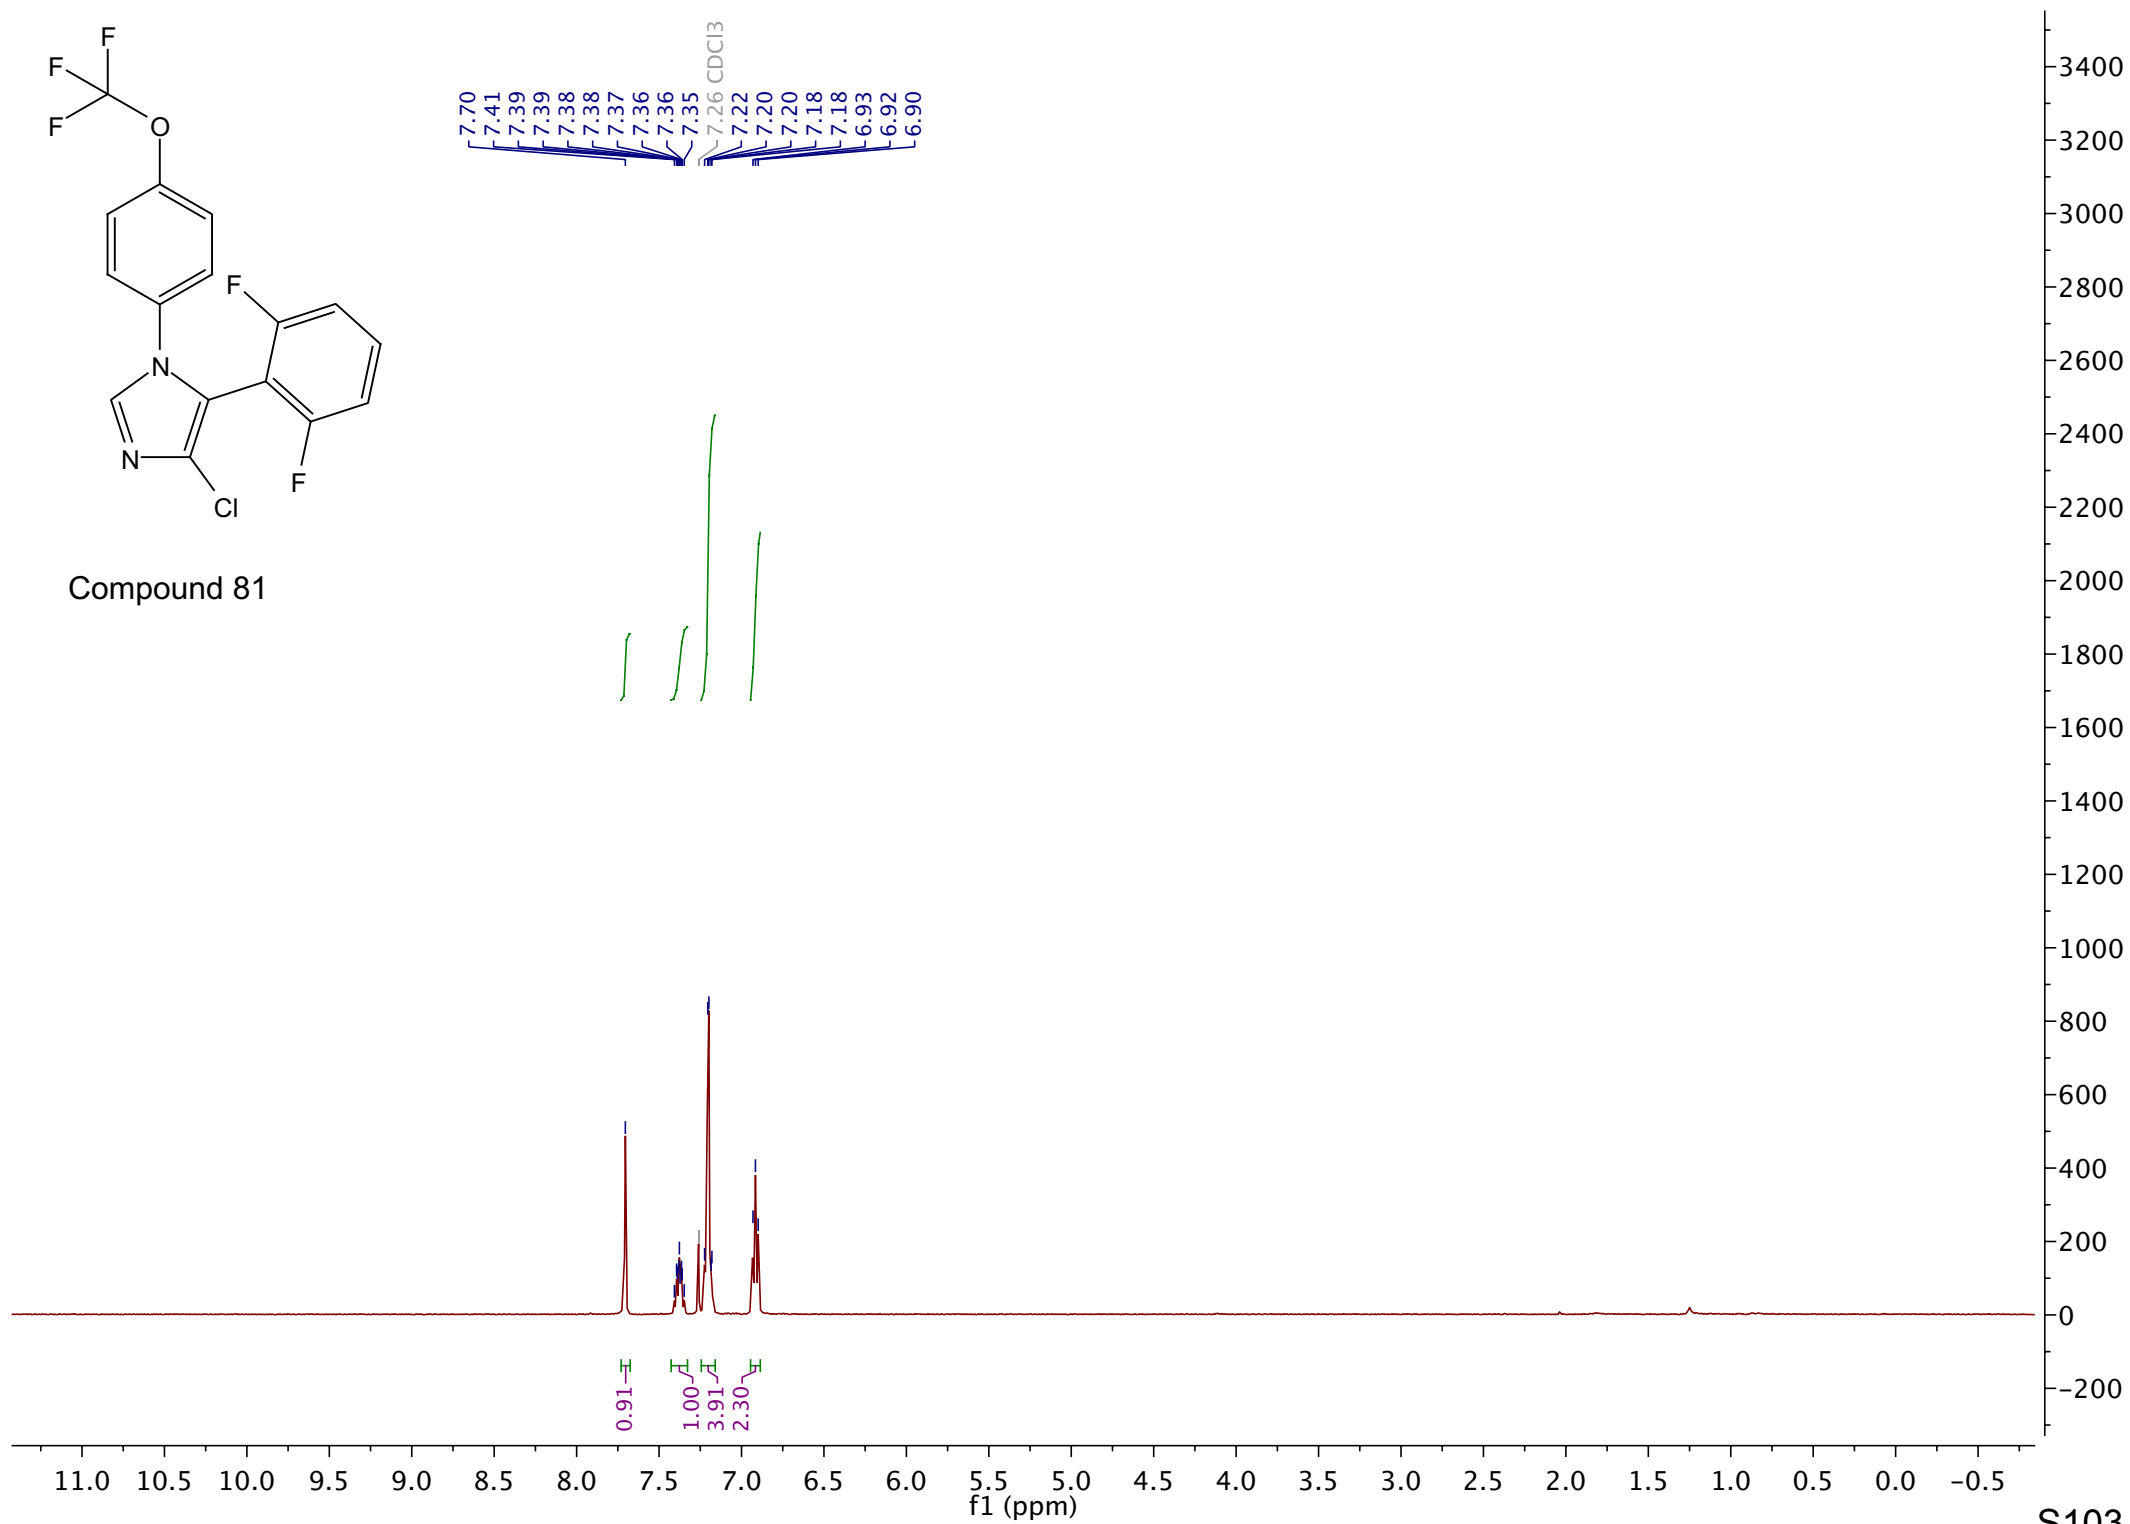

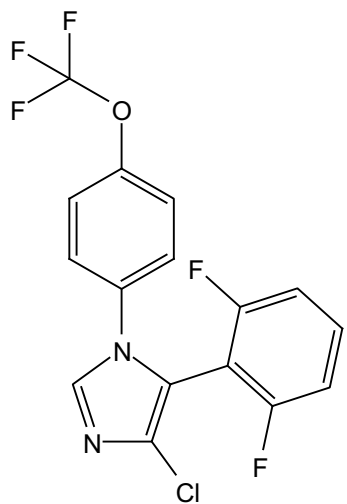

Compound 81

161.74  
161.69  
159.73  
159.69  
149.20  
149.18  
136.84  
134.52  
132.53  
132.28  
132.20  
132.12  
126.25  
123.30  
122.01  
121.42  
119.36  
117.47  
116.18  
111.98  
111.94  
111.82  
111.78  
105.48  
105.32  
105.16

—77.16 CDCl<sub>3</sub>

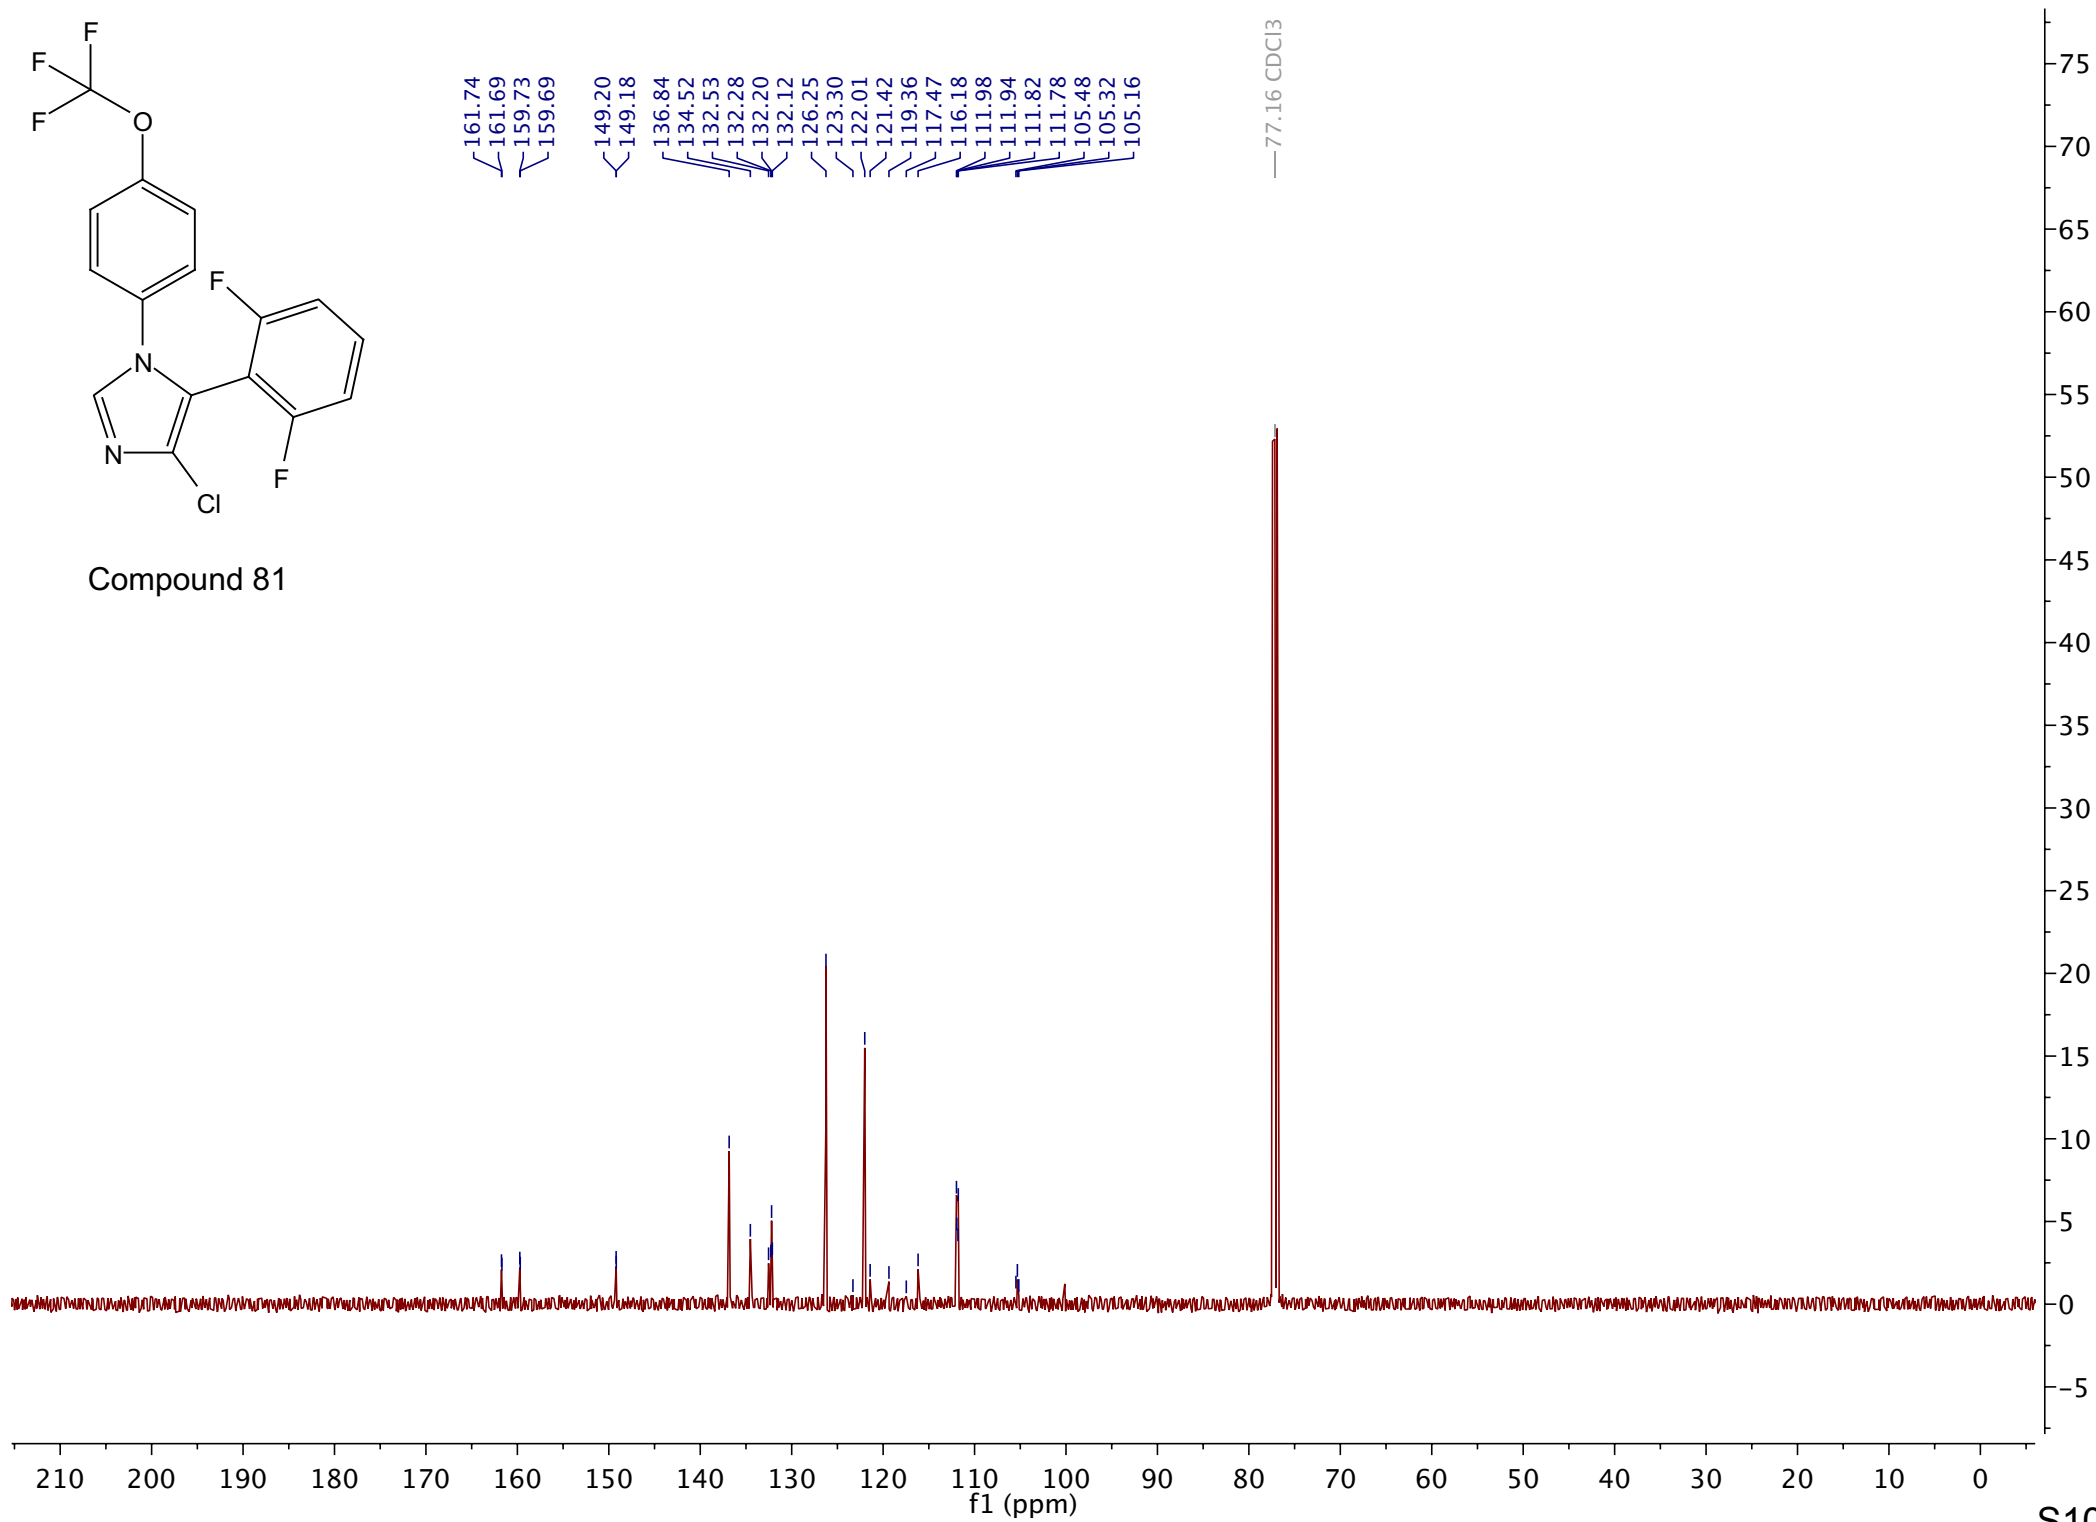



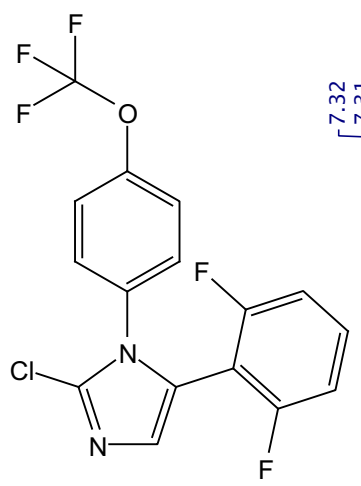

Compound 82

7.32  
7.31  
7.30  
7.29  
7.29  
7.29  
7.28  
7.27  
7.27  
7.26 CDCl3  
7.25  
7.24  
7.23  
7.22  
7.20  
6.87  
6.86  
6.85  
6.85  
6.83  
6.82  
6.82

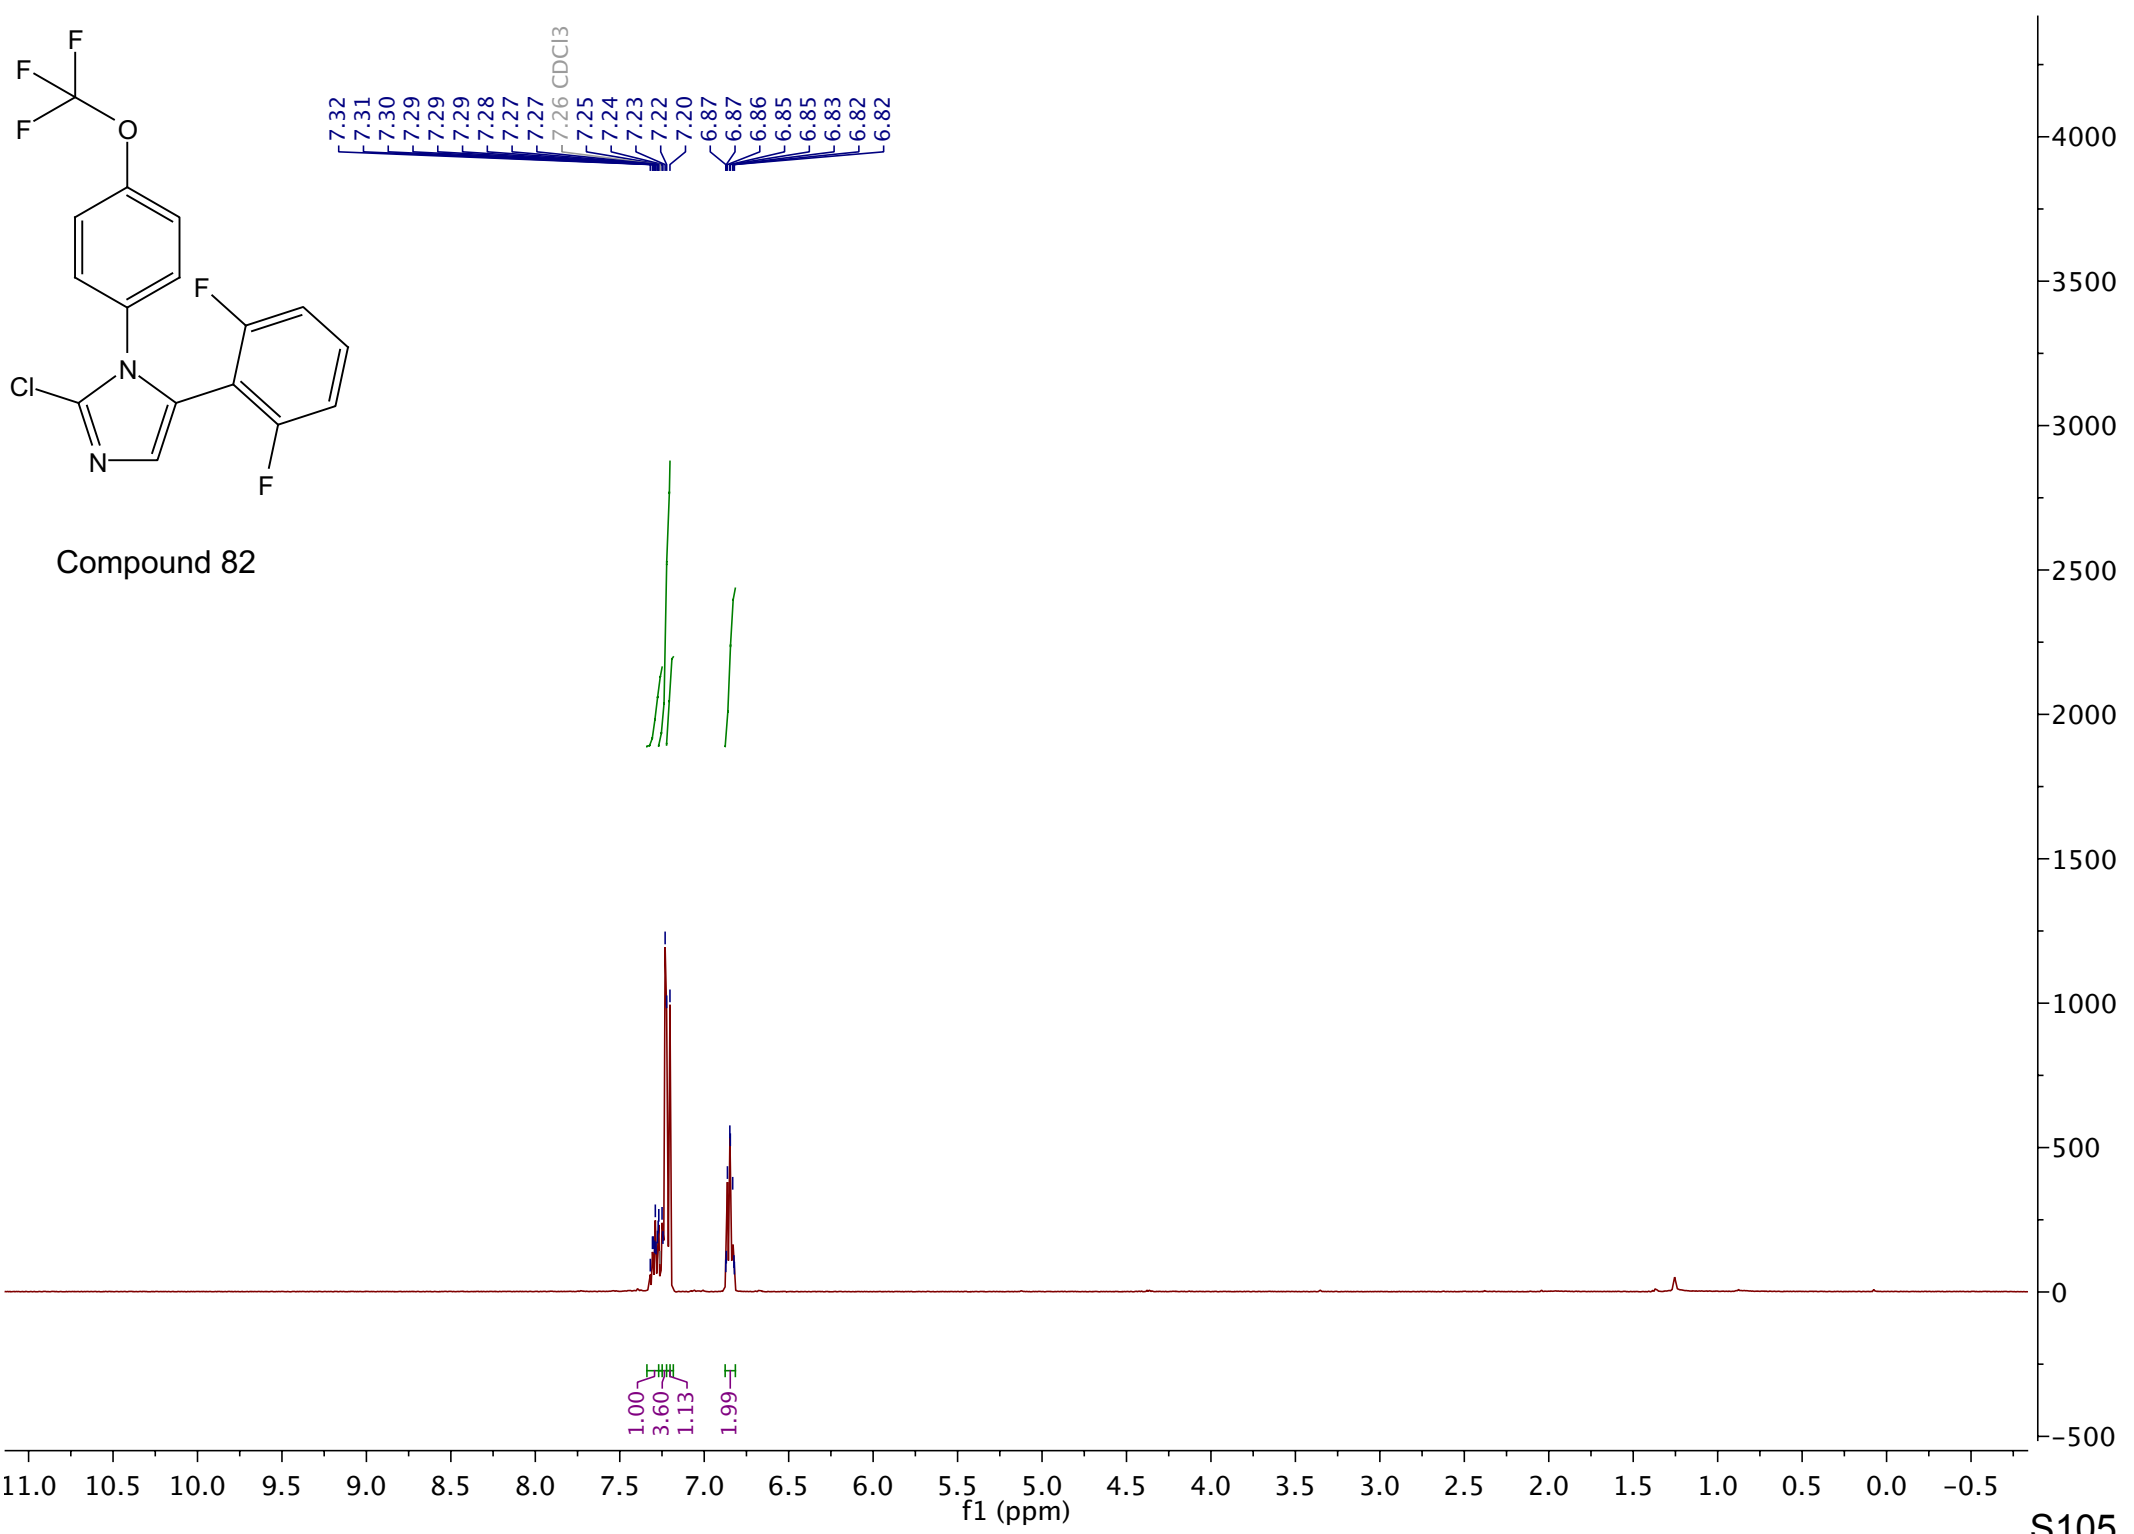

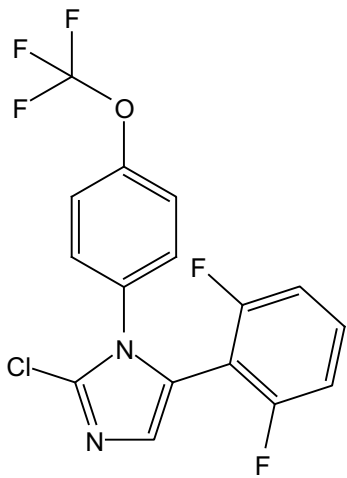

Compound 82

- 171.35
- 161.44
- 161.40
- 159.77
- 159.73
- 149.68
- 149.50
- 149.48
- 149.47
- 134.36
- 133.35
- 131.64
- 131.57
- 131.50
- 130.53
- 128.96
- 122.96
- 122.52
- 121.41
- 121.24
- 119.53
- 117.81
- 111.75
- 111.72
- 111.61
- 111.58
- 106.97
- 106.84
- 106.71

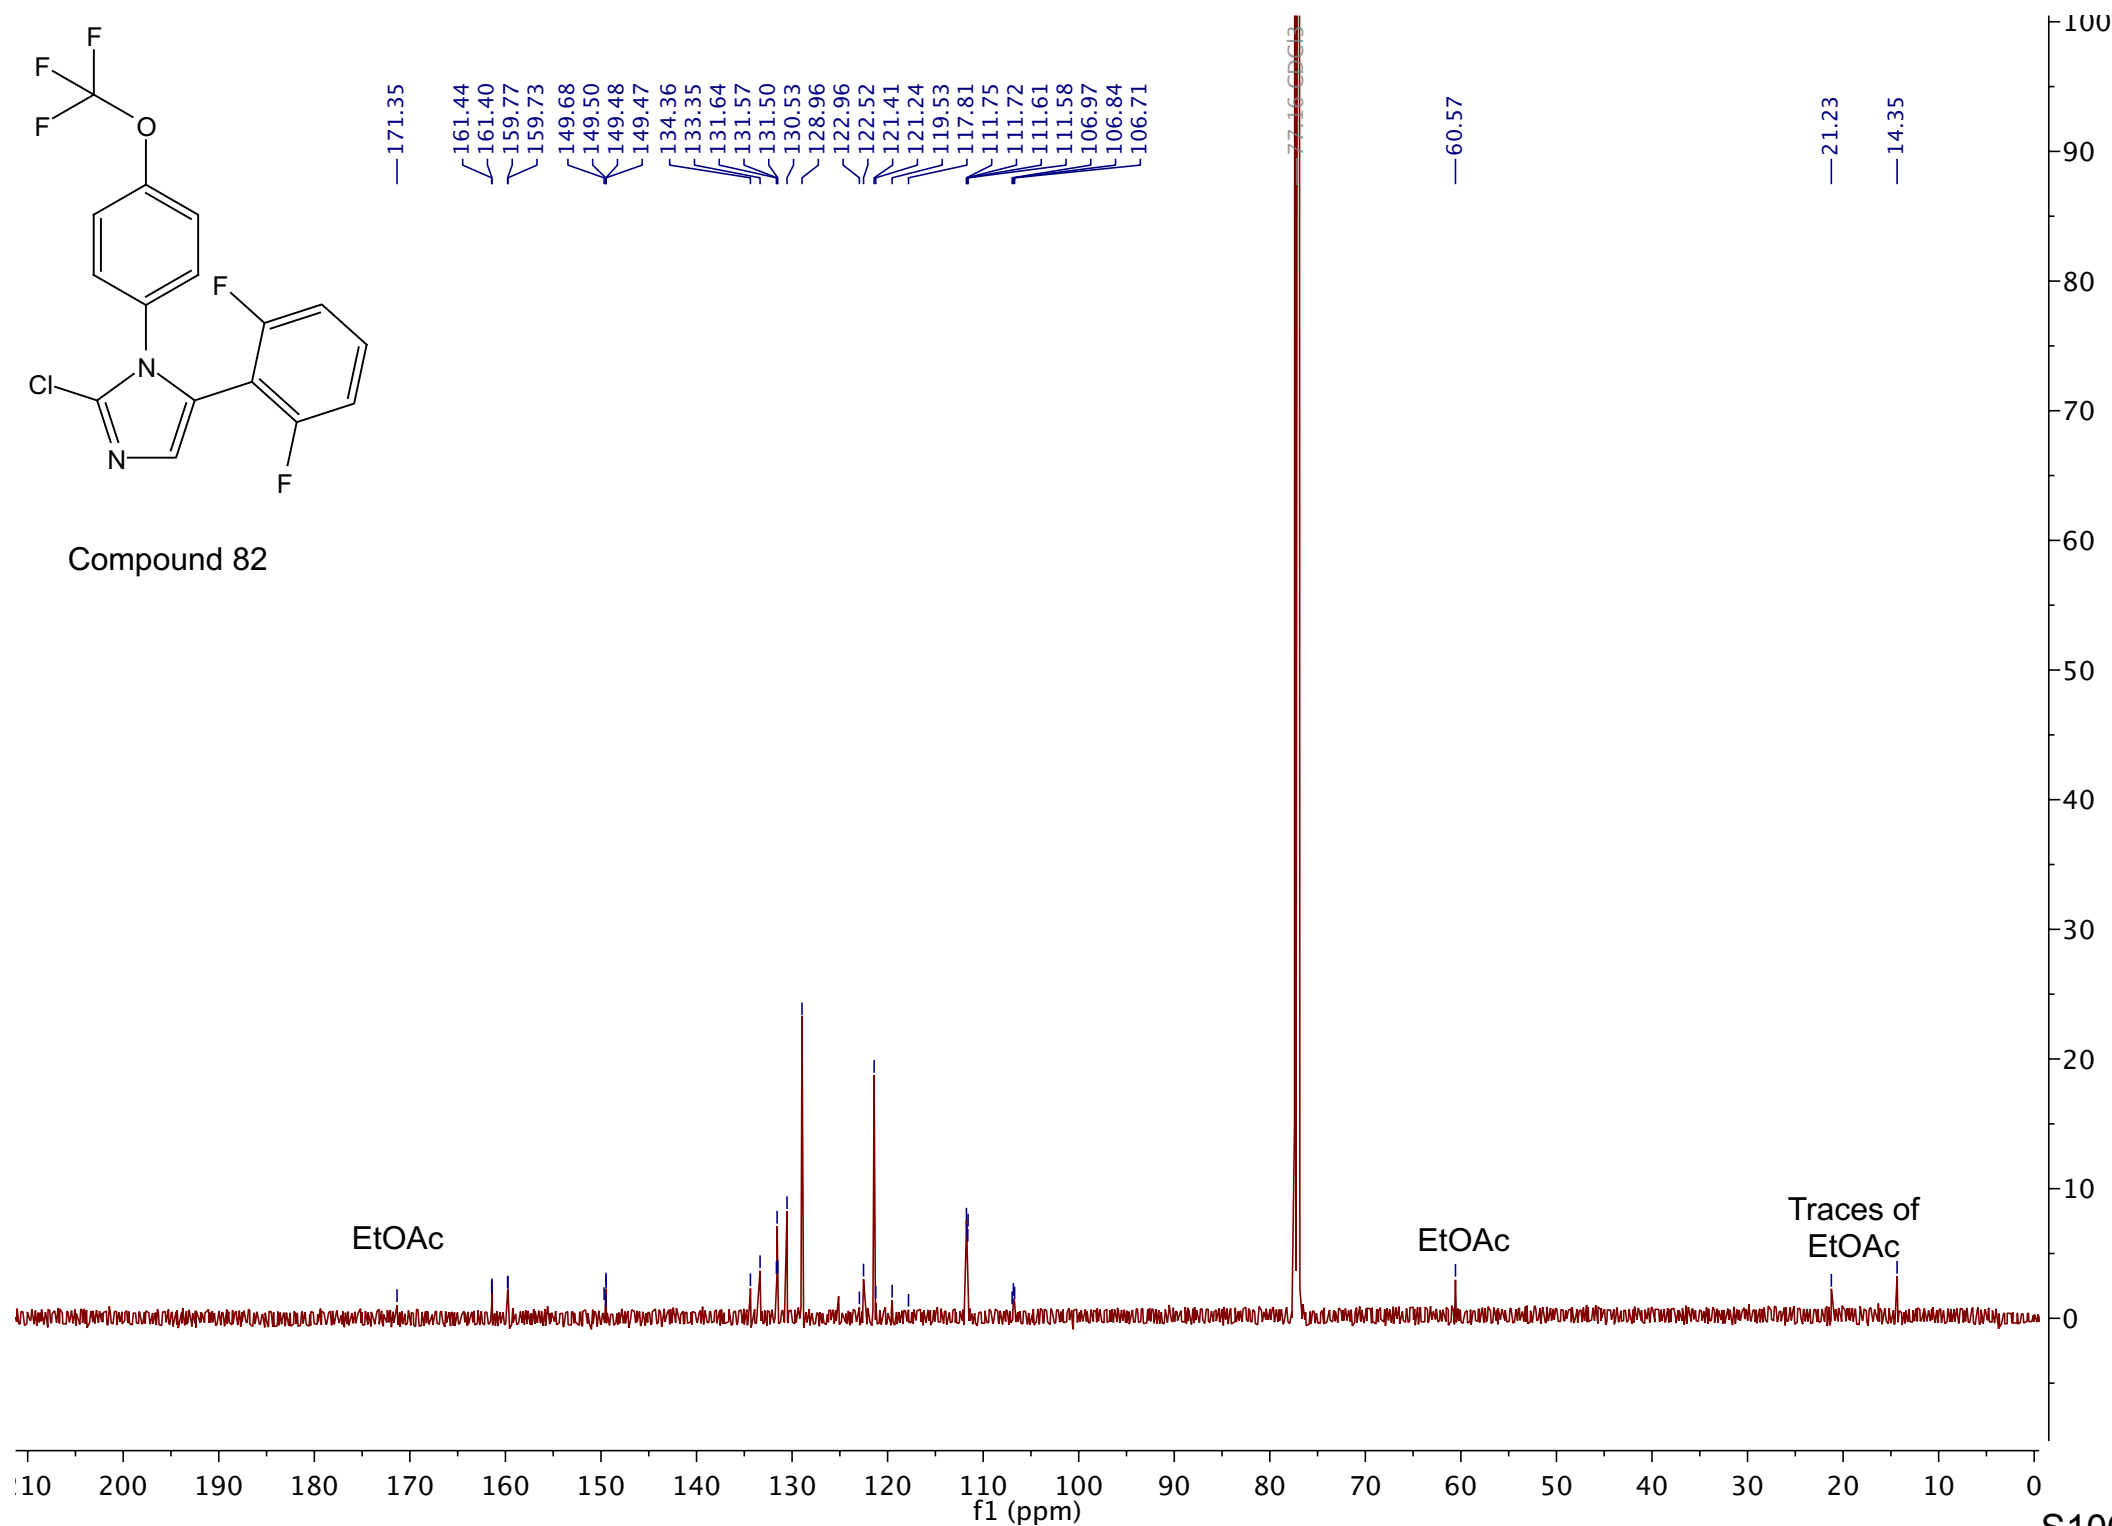

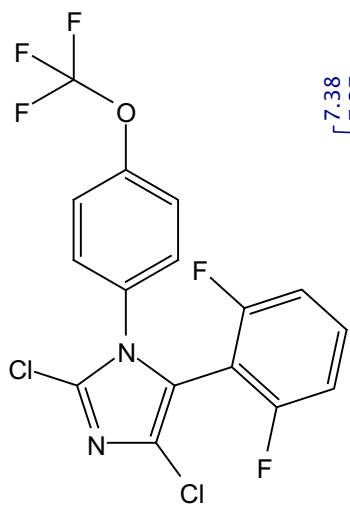

Compound 83

7.38  
7.37  
7.36  
7.36  
7.35  
7.35  
7.34  
7.33  
7.32  
7.26 CDCl<sub>3</sub>  
7.25  
7.24  
7.23  
7.22  
7.21  
6.90  
6.89  
6.88  
6.88  
6.86  
6.85

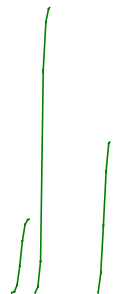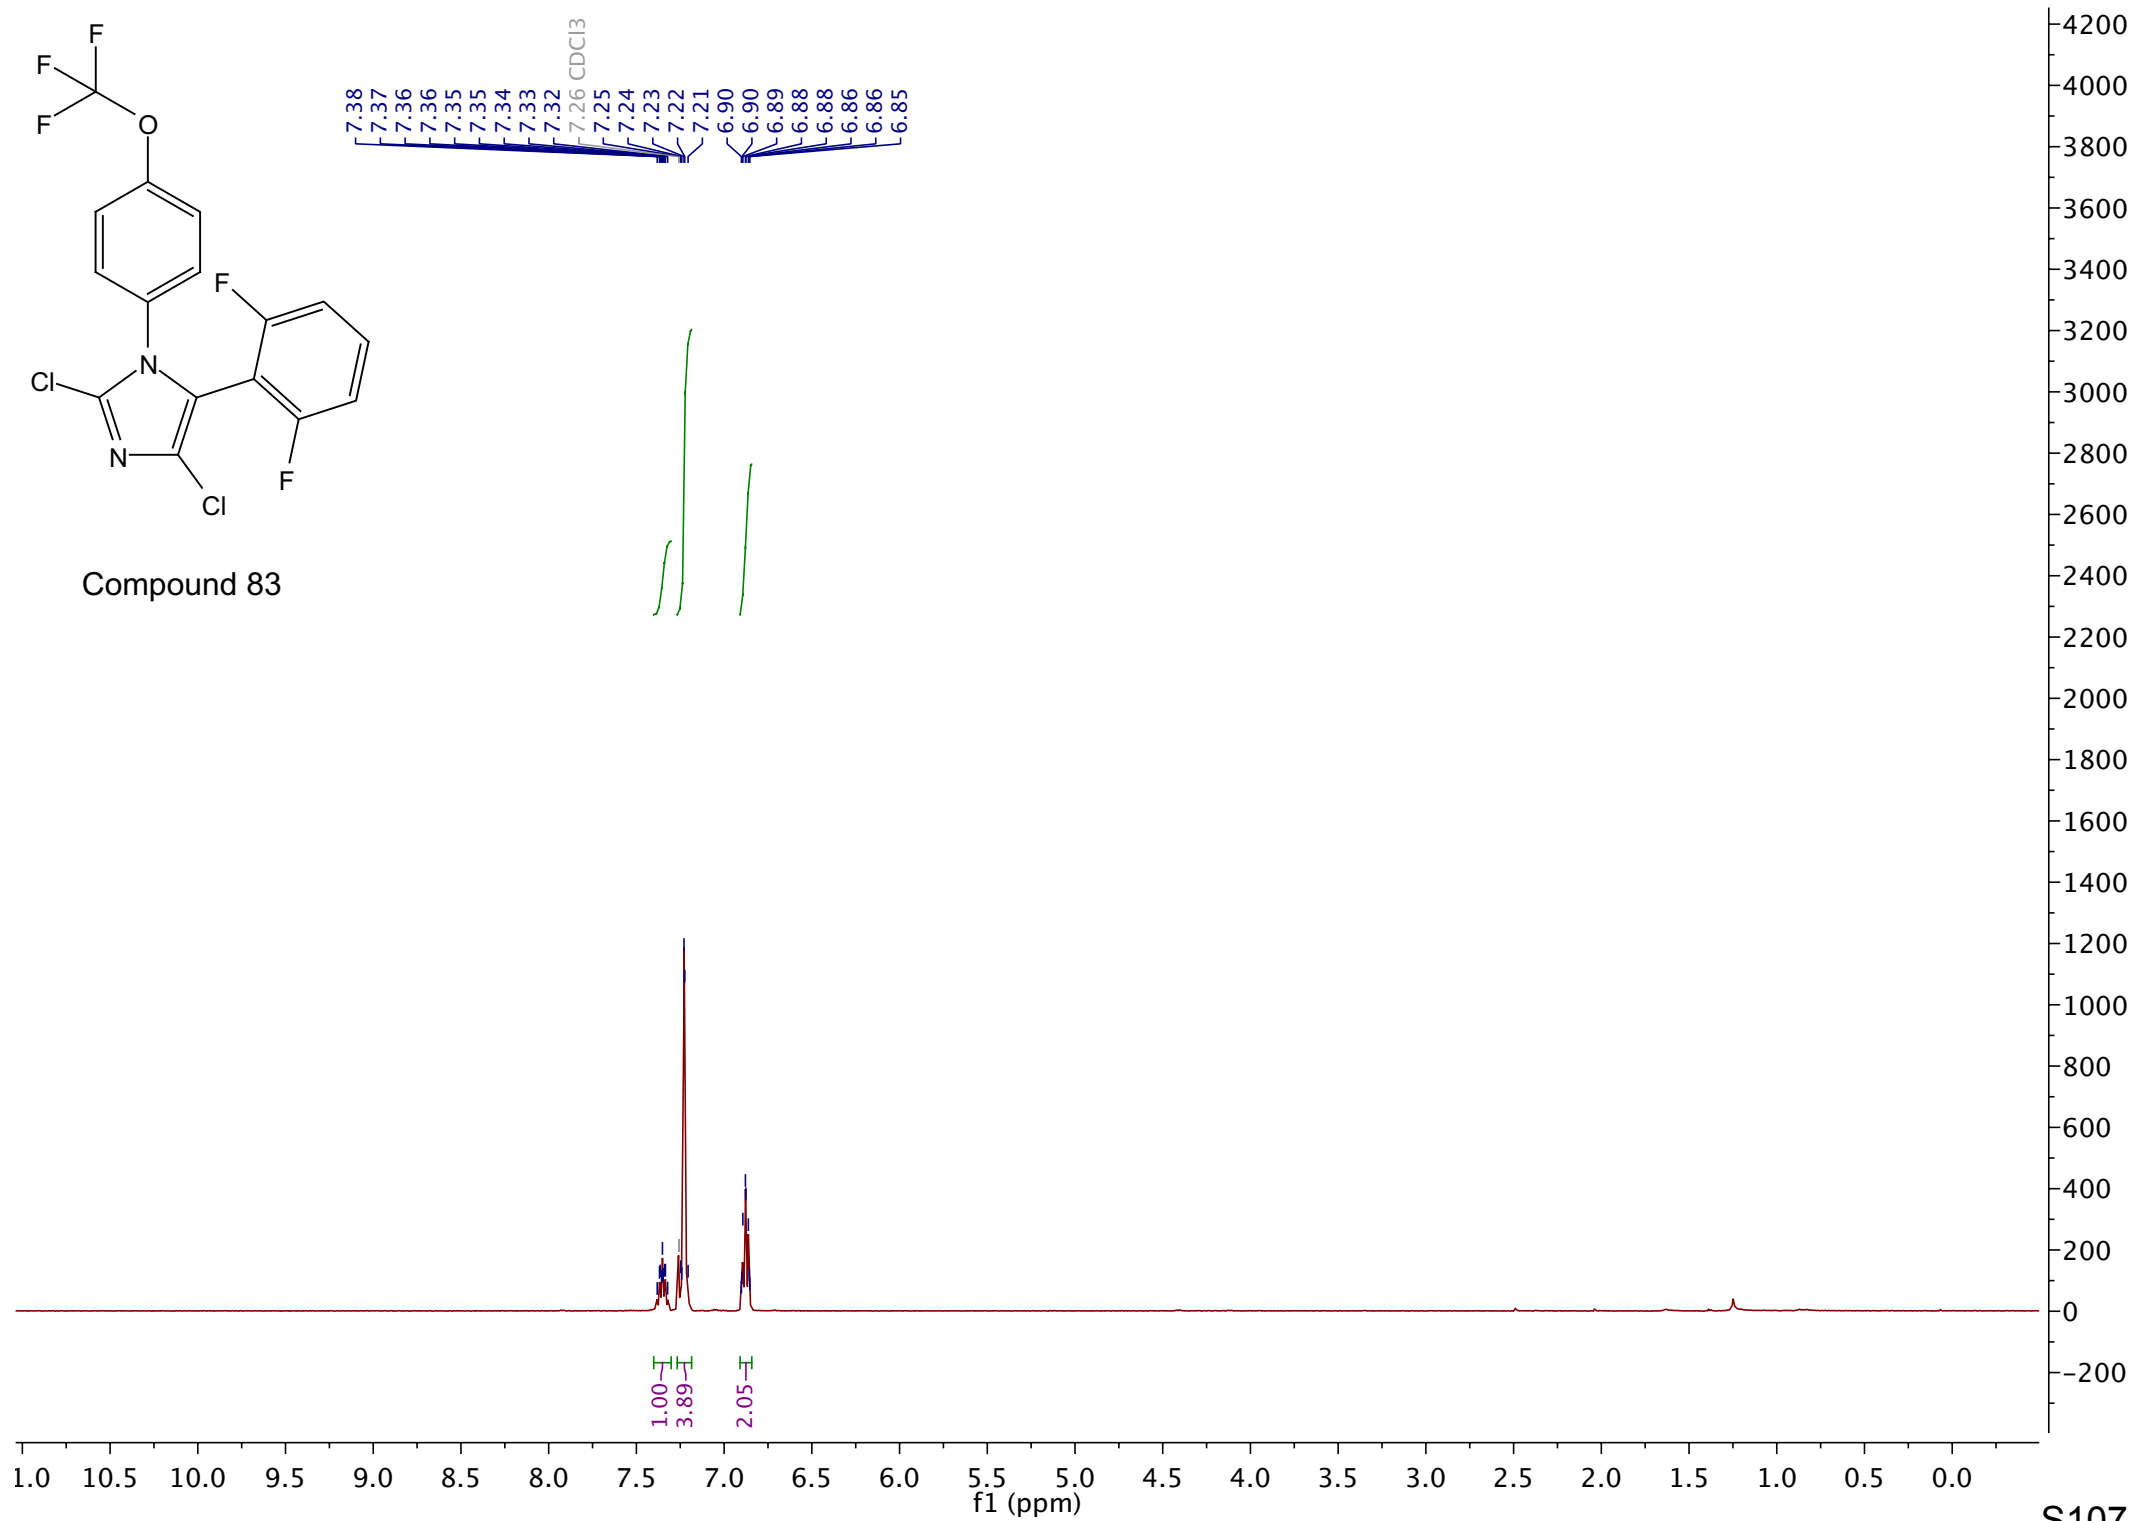

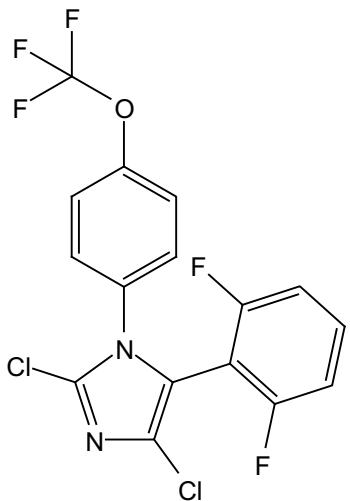

Compound 83

- 161.60
- 161.56
- 159.92
- 159.89
- 149.81
- 149.80
- 132.76
- 132.68
- 132.65
- 132.61
- 132.54
- 130.50
- 128.96
- 122.92
- 121.55
- 121.20
- 119.48
- 118.60
- 117.77
- 111.89
- 111.86
- 111.75
- 111.72
- 105.06
- 104.93
- 104.80

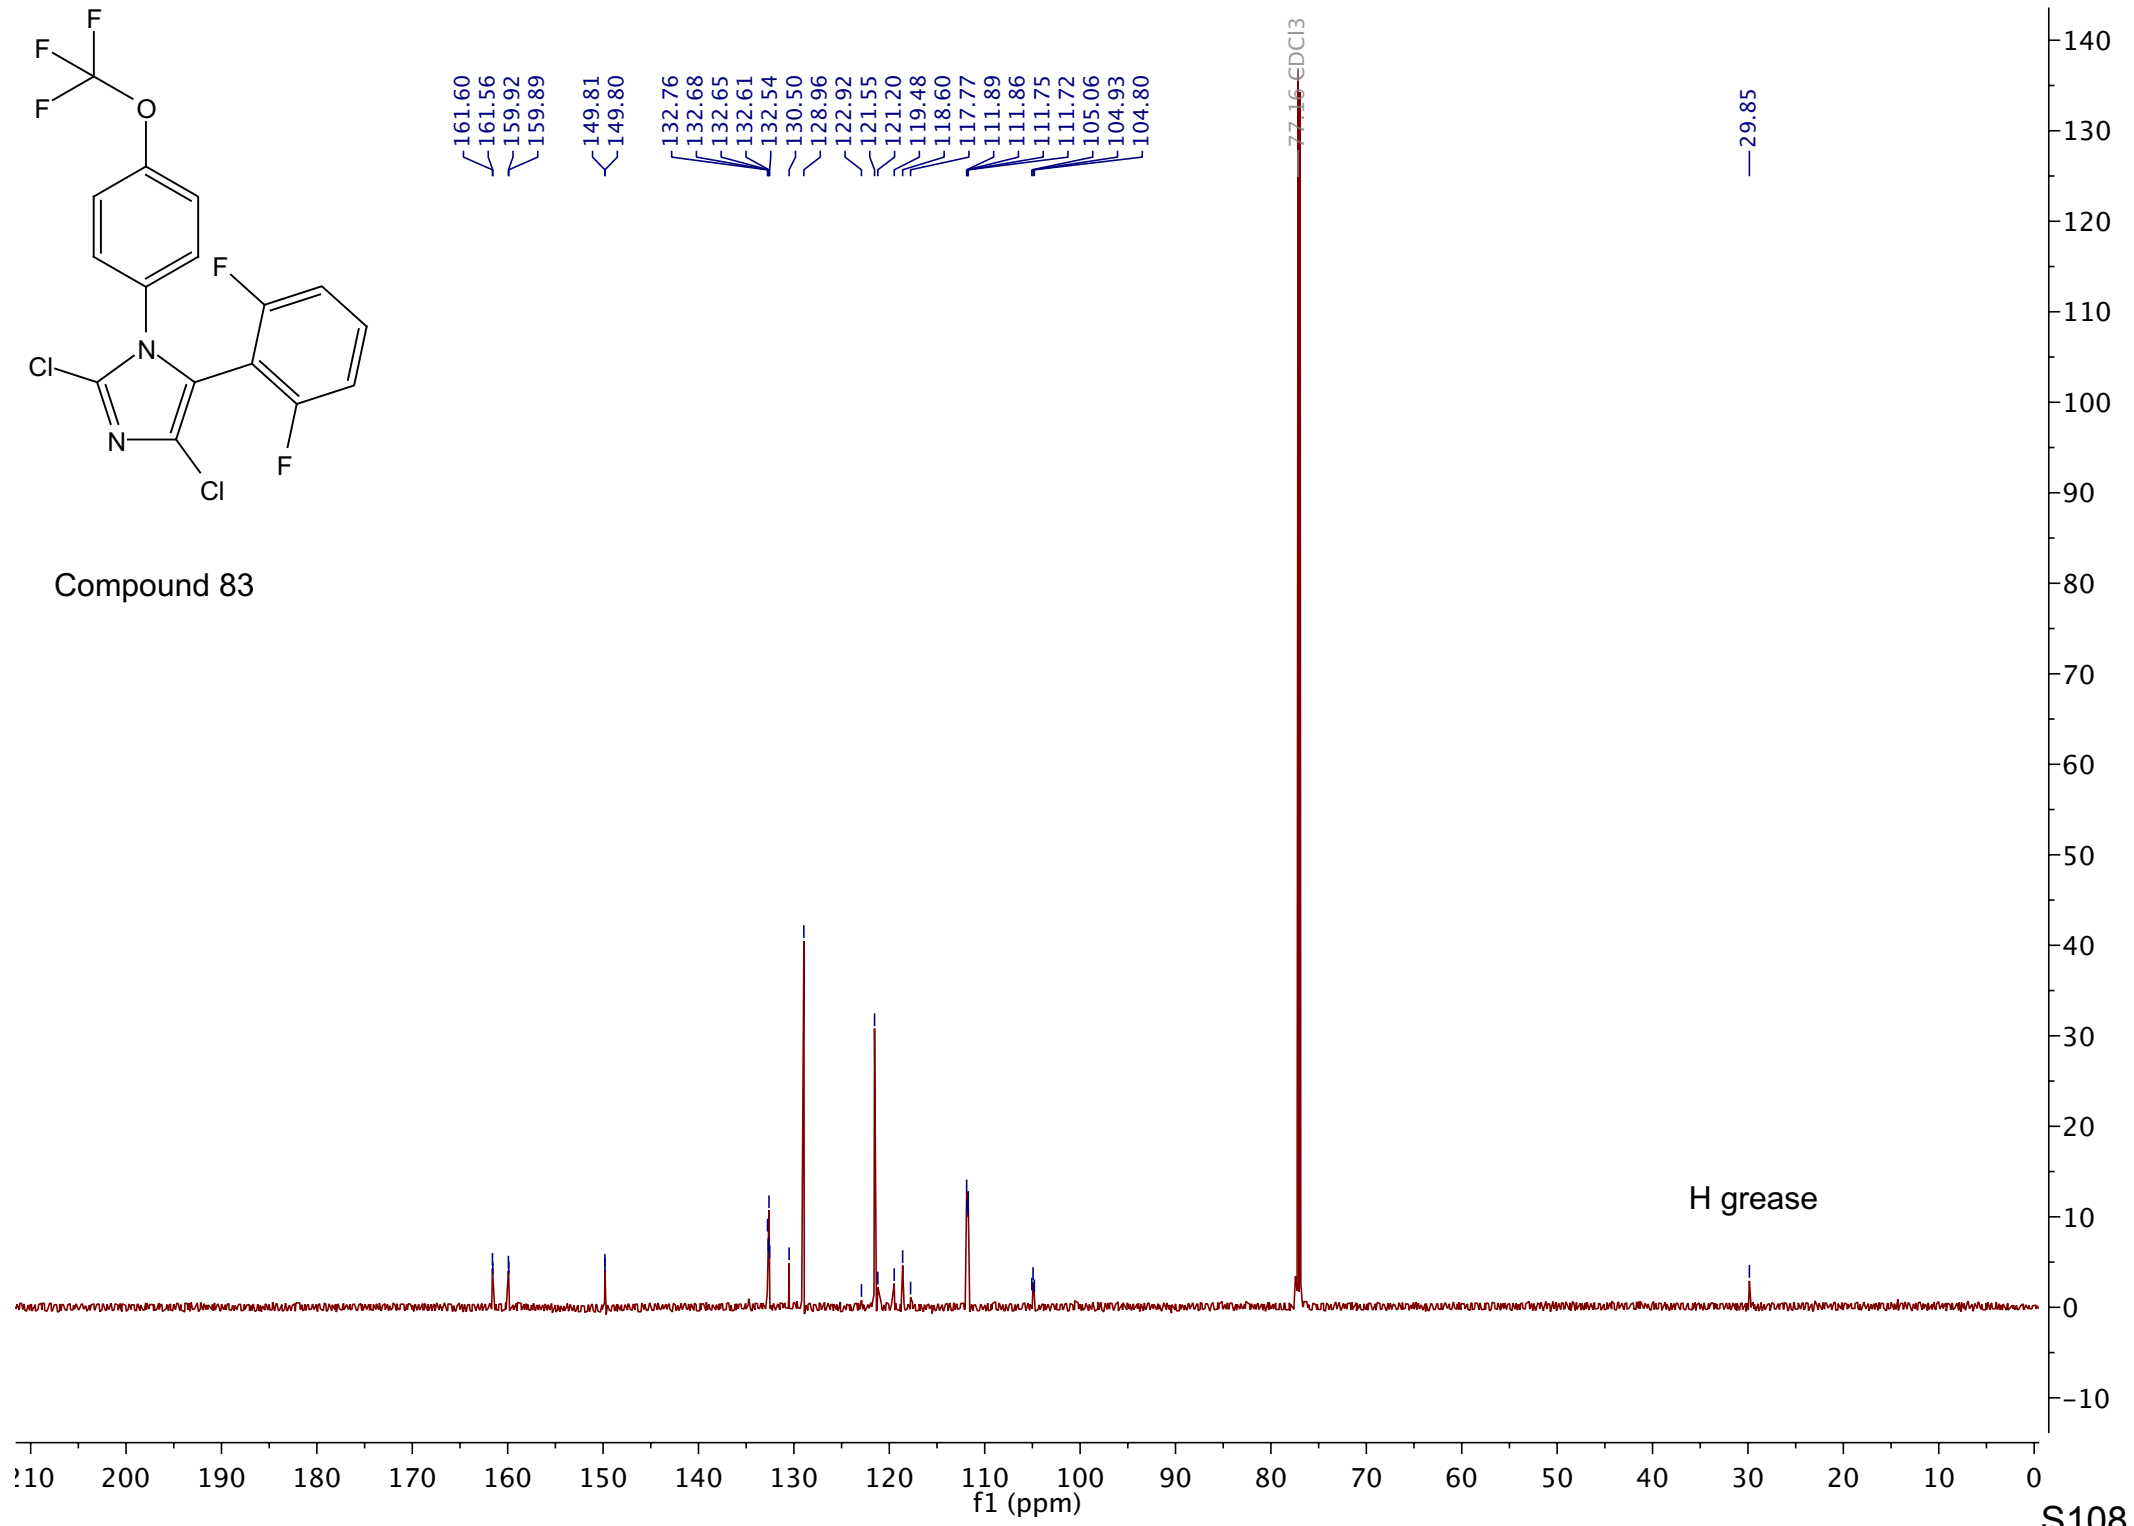

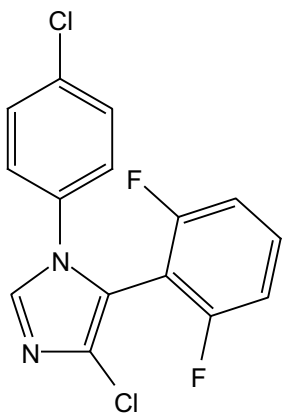

Compound 84

7.69  
7.40  
7.38  
7.37  
7.35  
7.34  
7.32  
7.26 CDCl<sub>3</sub>  
7.09  
7.08  
6.92  
6.91  
6.89

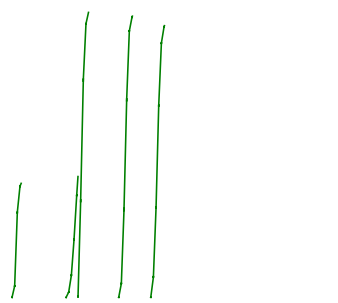

1.00 H  
1.06 H  
2.50 H  
2.46 H  
2.38 H

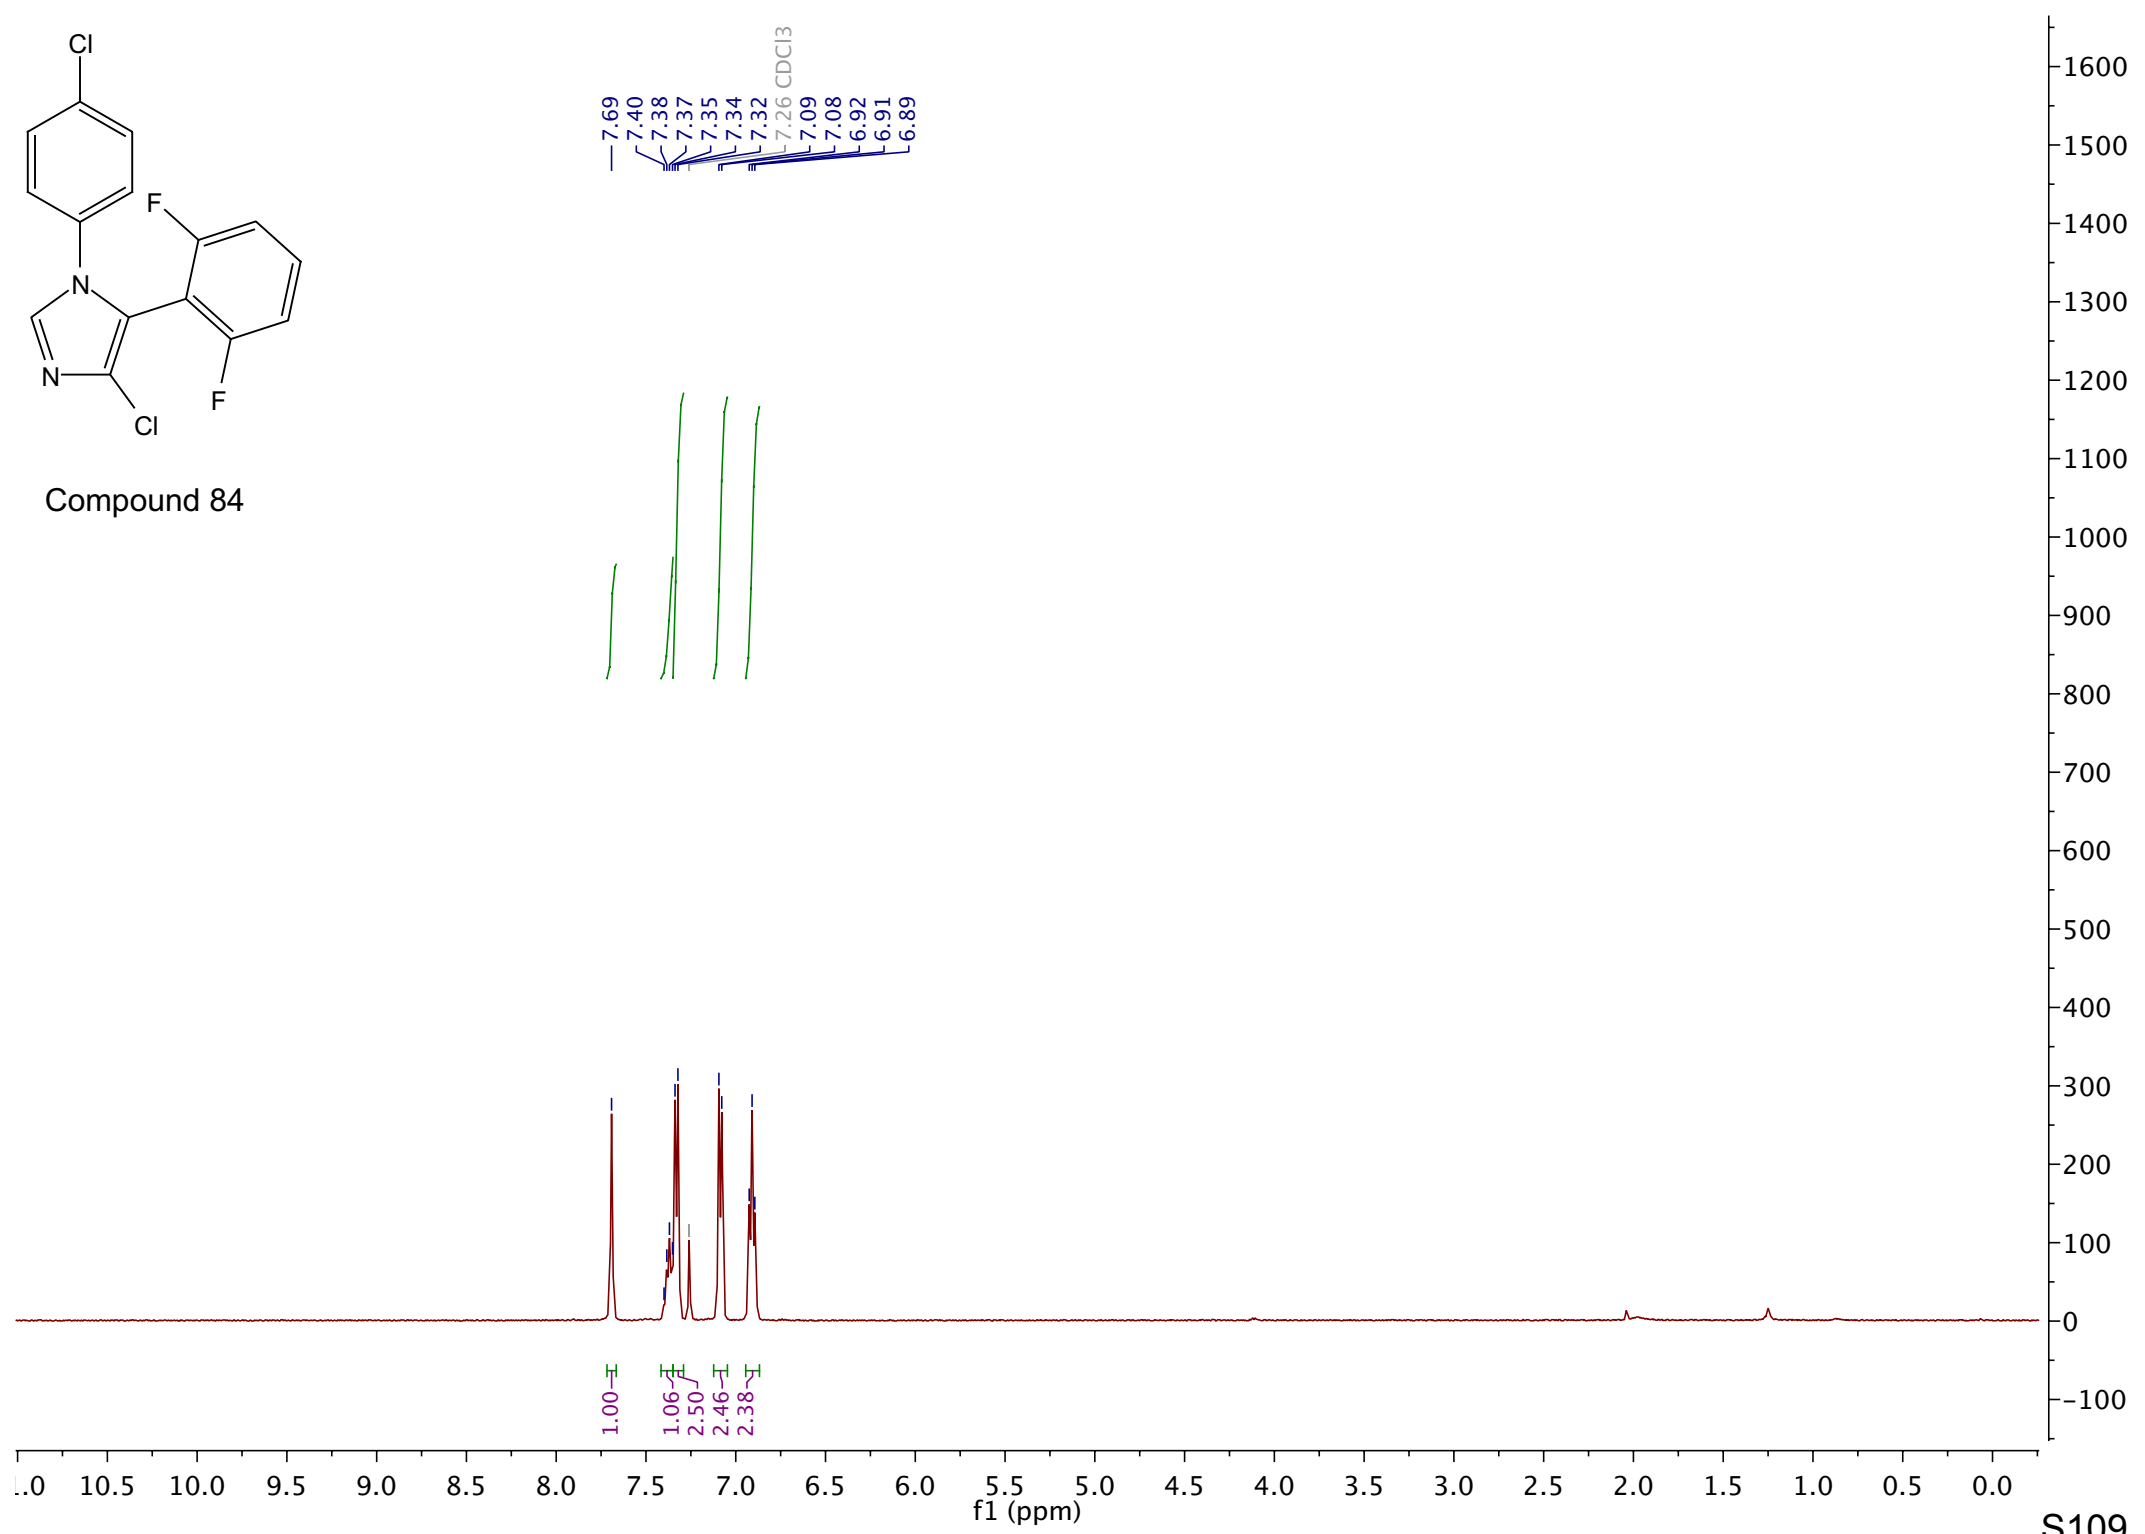

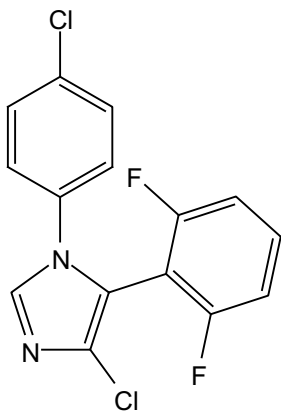

Compound 84

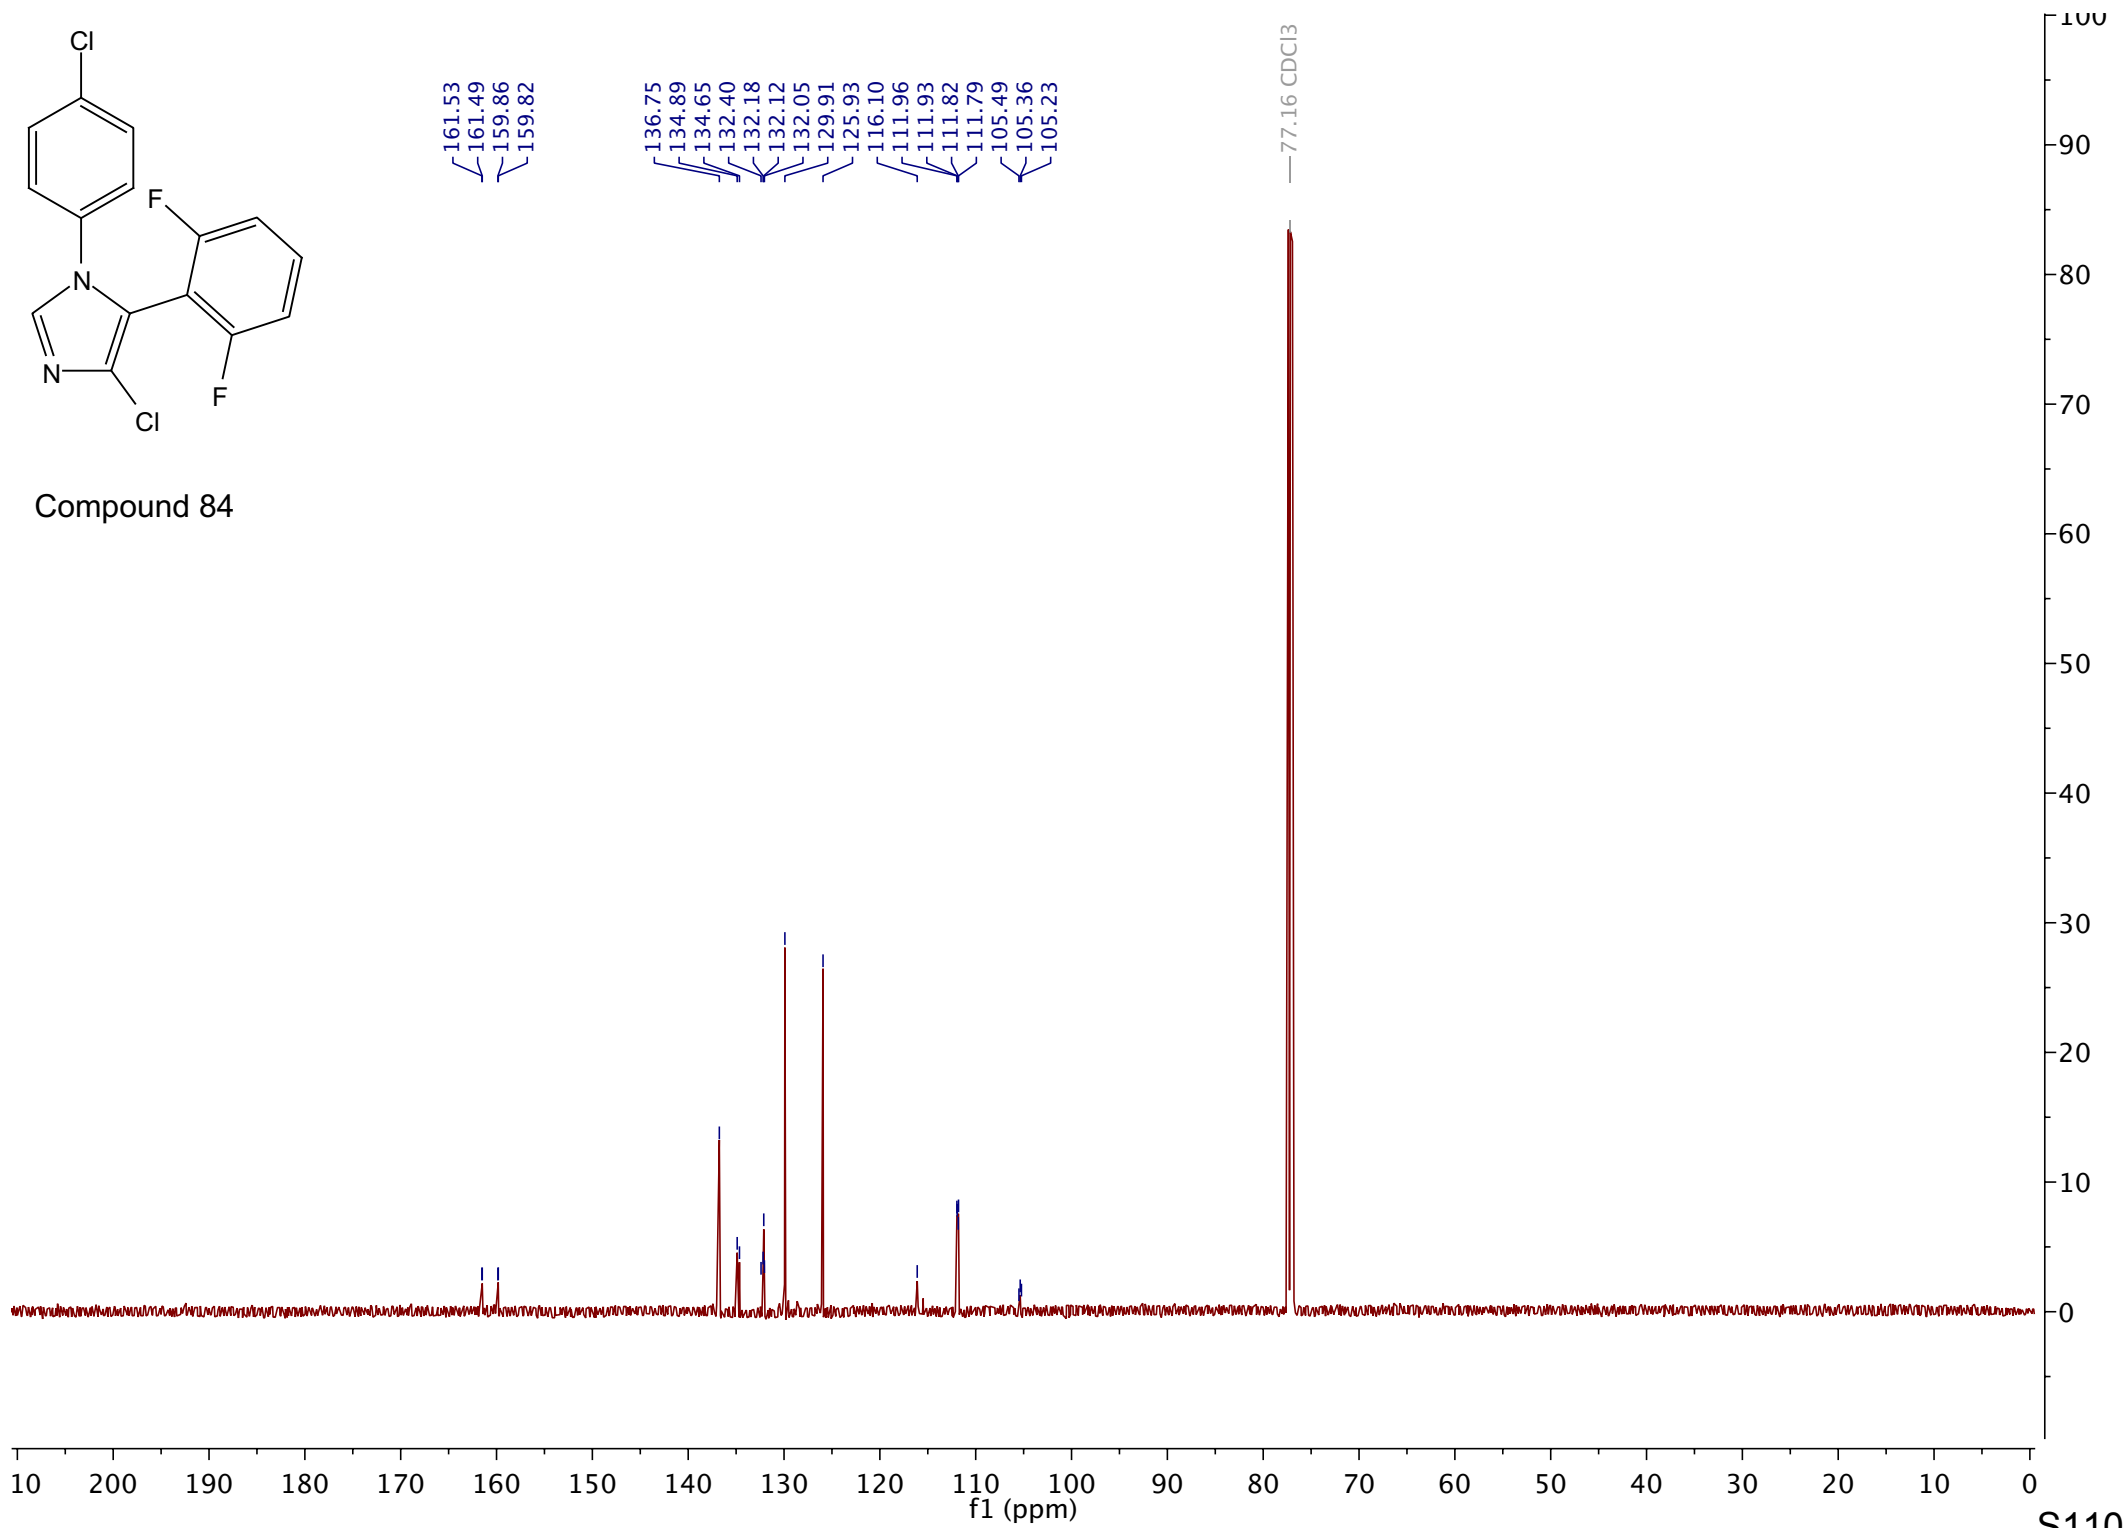

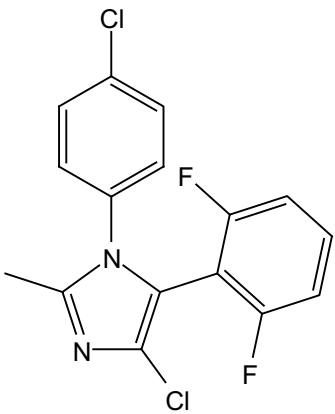

Compound 85

7.36  
7.35  
7.34  
7.34  
7.33  
7.33  
7.32  
7.31  
7.31  
7.30  
7.30  
7.29  
7.28  
7.27  
7.26 CDCl3  
7.09  
7.09  
7.07  
6.88  
6.87  
6.87  
6.85  
6.85  
6.84

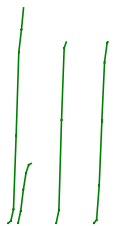

2.31

1.59

1.25

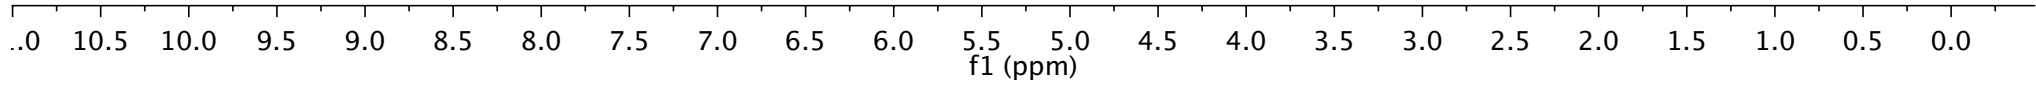

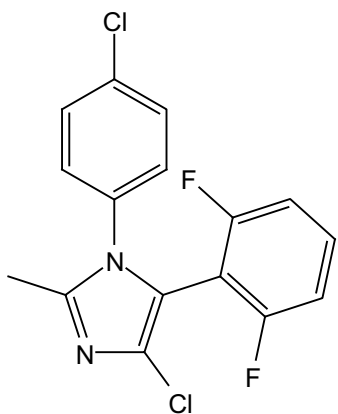

Compound 85

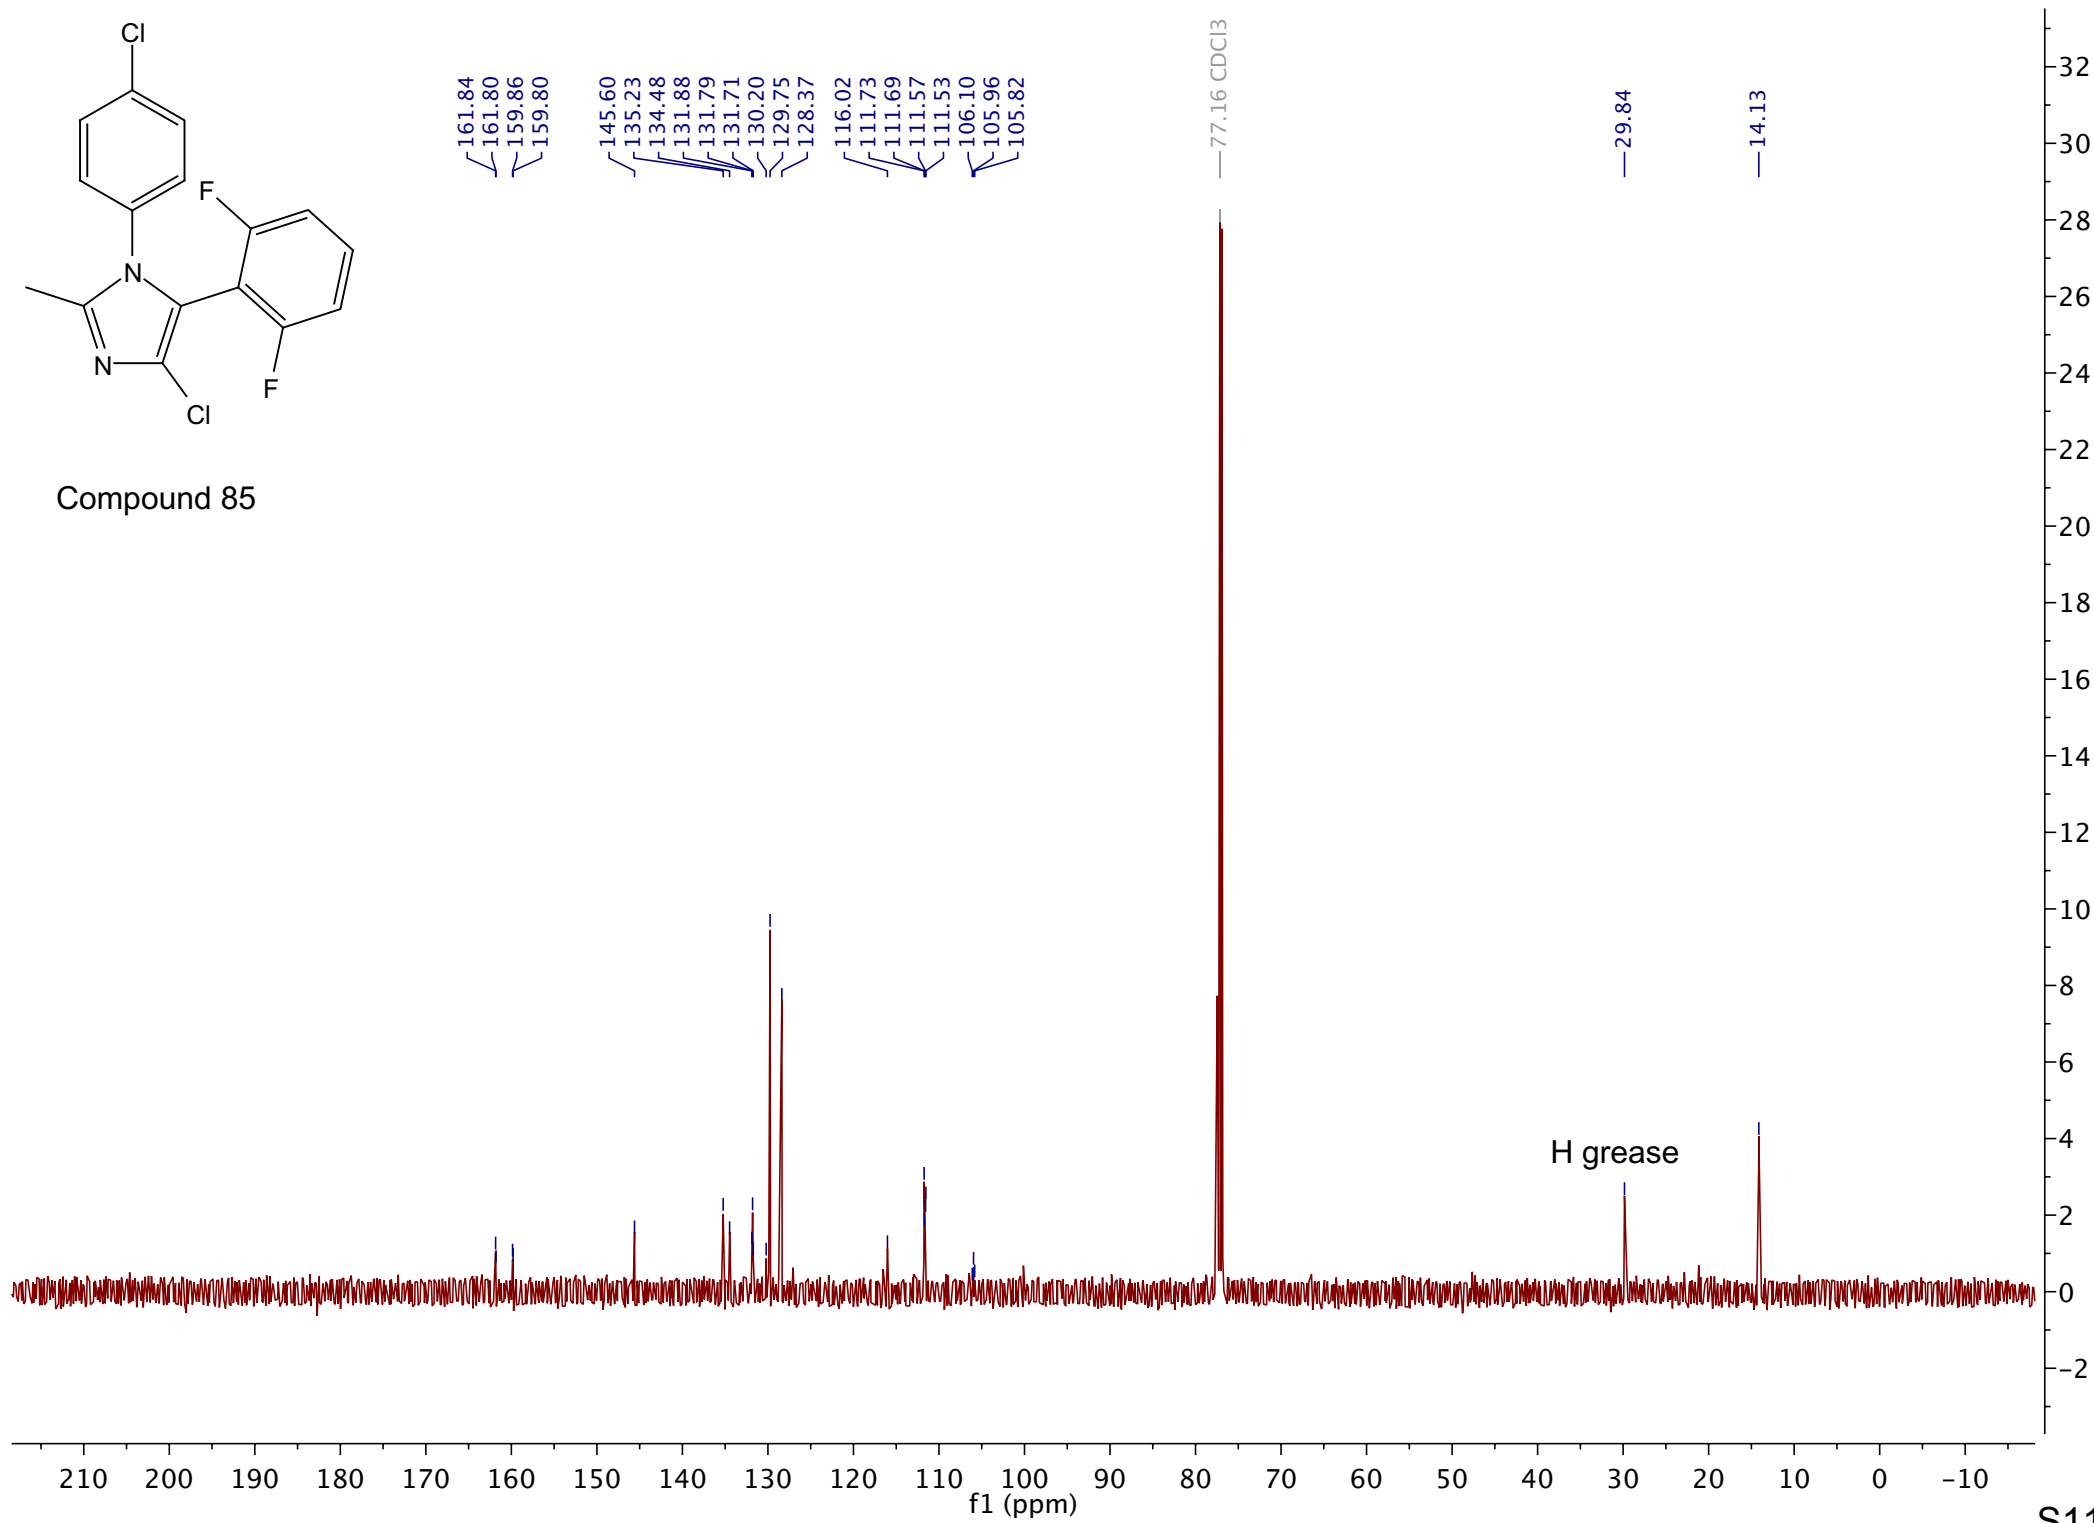



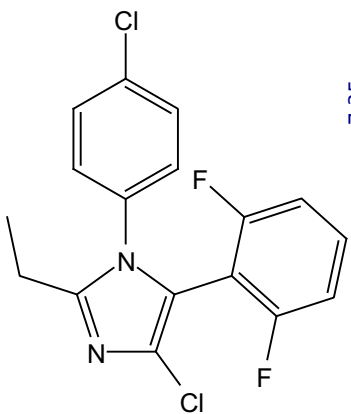

Compound 86

7.35  
7.34  
7.34  
7.33  
7.32  
7.32  
7.31  
7.31  
7.30  
7.29  
7.29  
7.28  
7.28  
7.26  
7.26 CDCl<sub>3</sub>  
7.10  
7.08  
7.08  
6.87  
6.87  
6.86  
6.85  
6.84  
6.83  
6.82  
6.81

2.60  
2.58  
2.57  
2.55

1.64  
1.27  
1.26  
1.24  
1.09

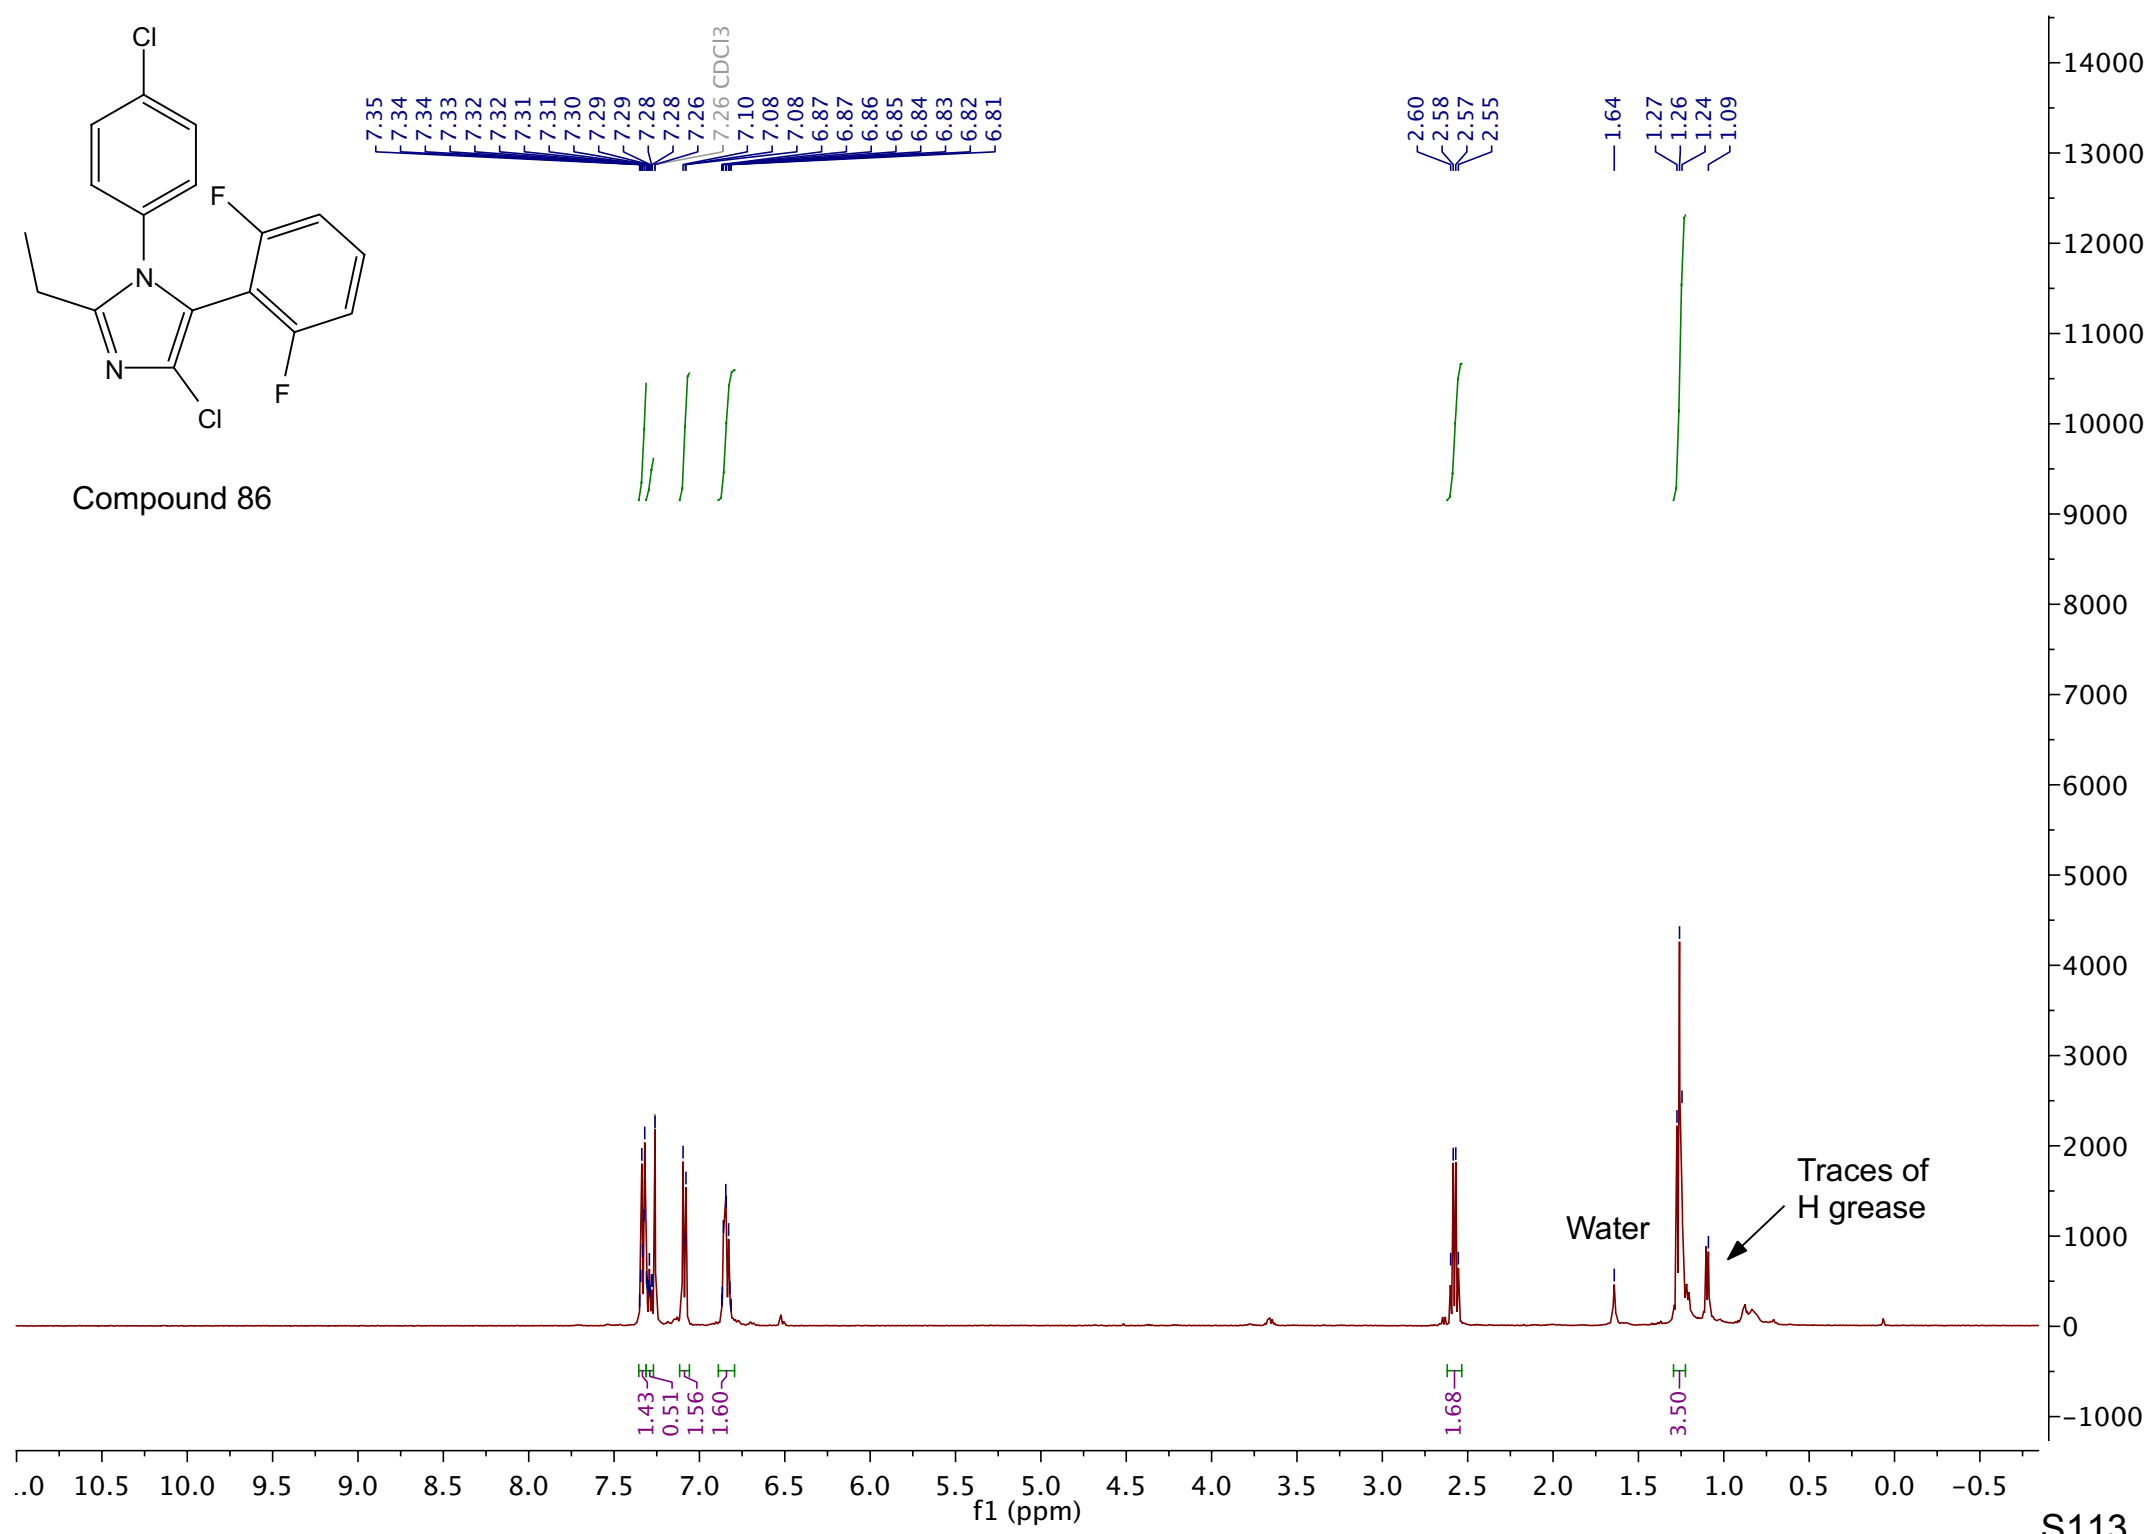

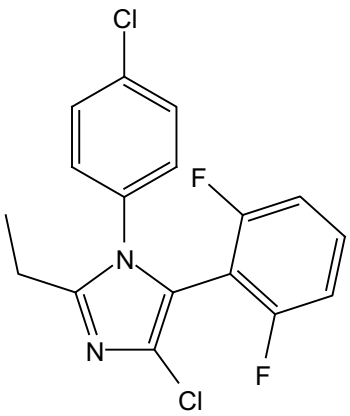

Compound 86

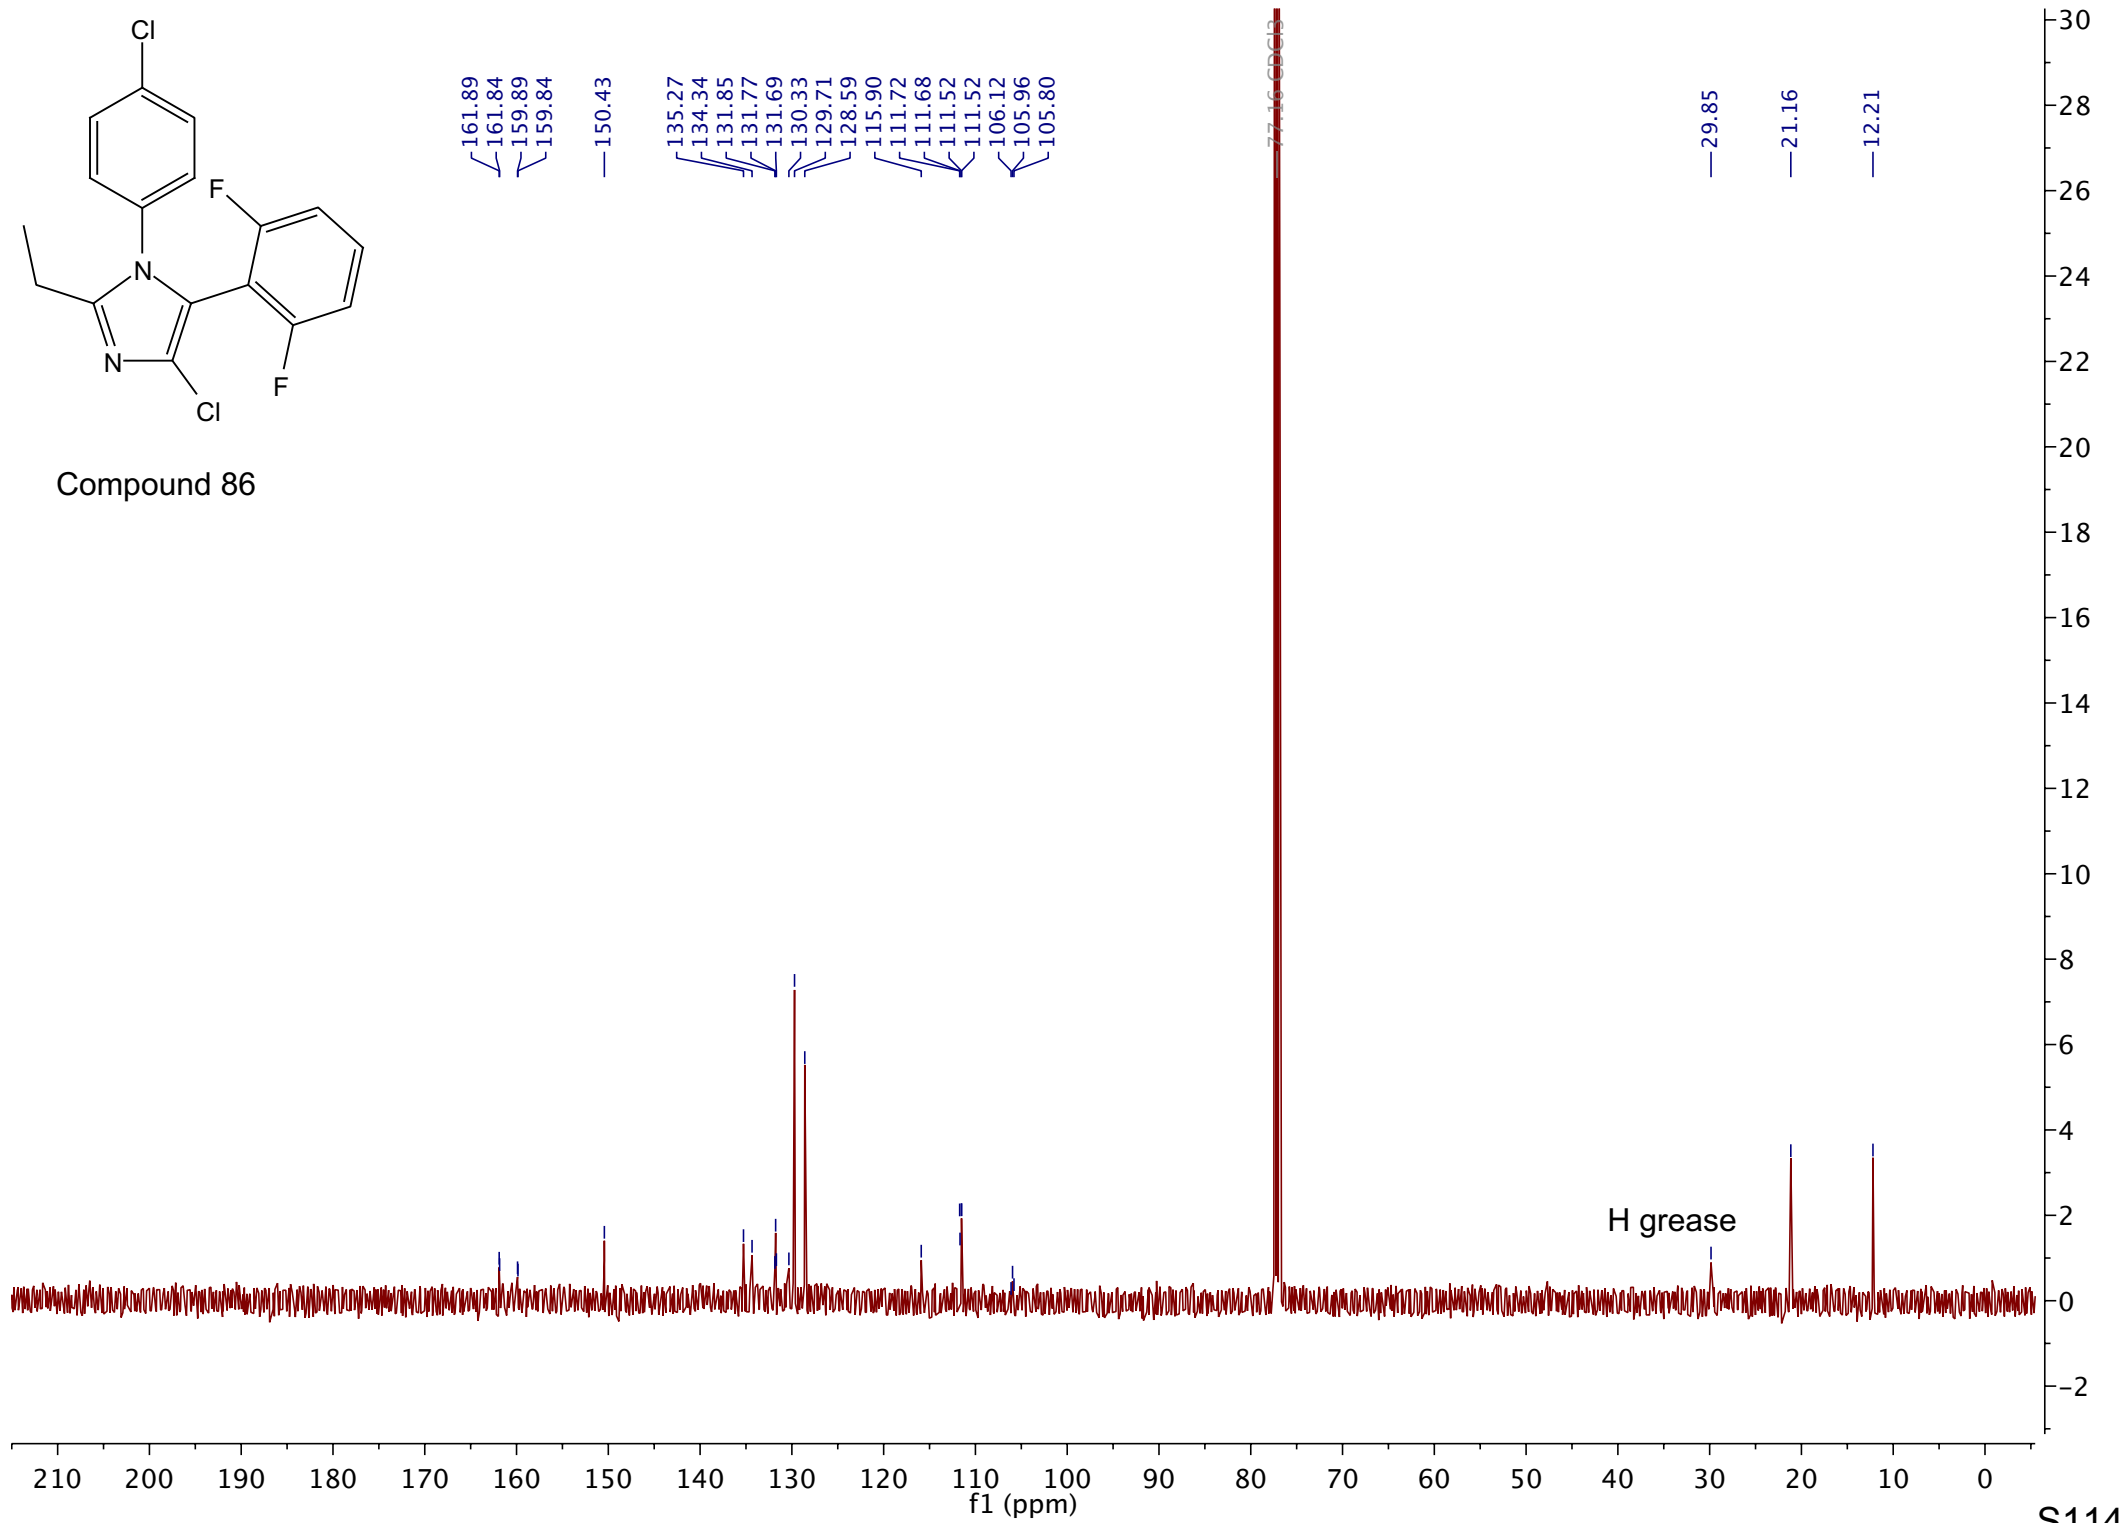

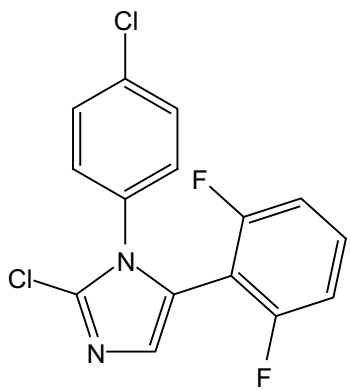

Compound 87

7.34  
7.34  
7.33  
7.31  
7.29  
7.29  
7.26 CDCl3  
7.26  
7.18  
7.13  
7.12  
6.85  
6.84  
6.82

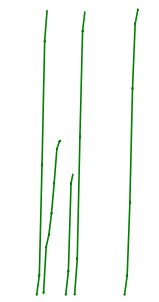

2.36  
1.28  
1.00  
2.35  
2.37

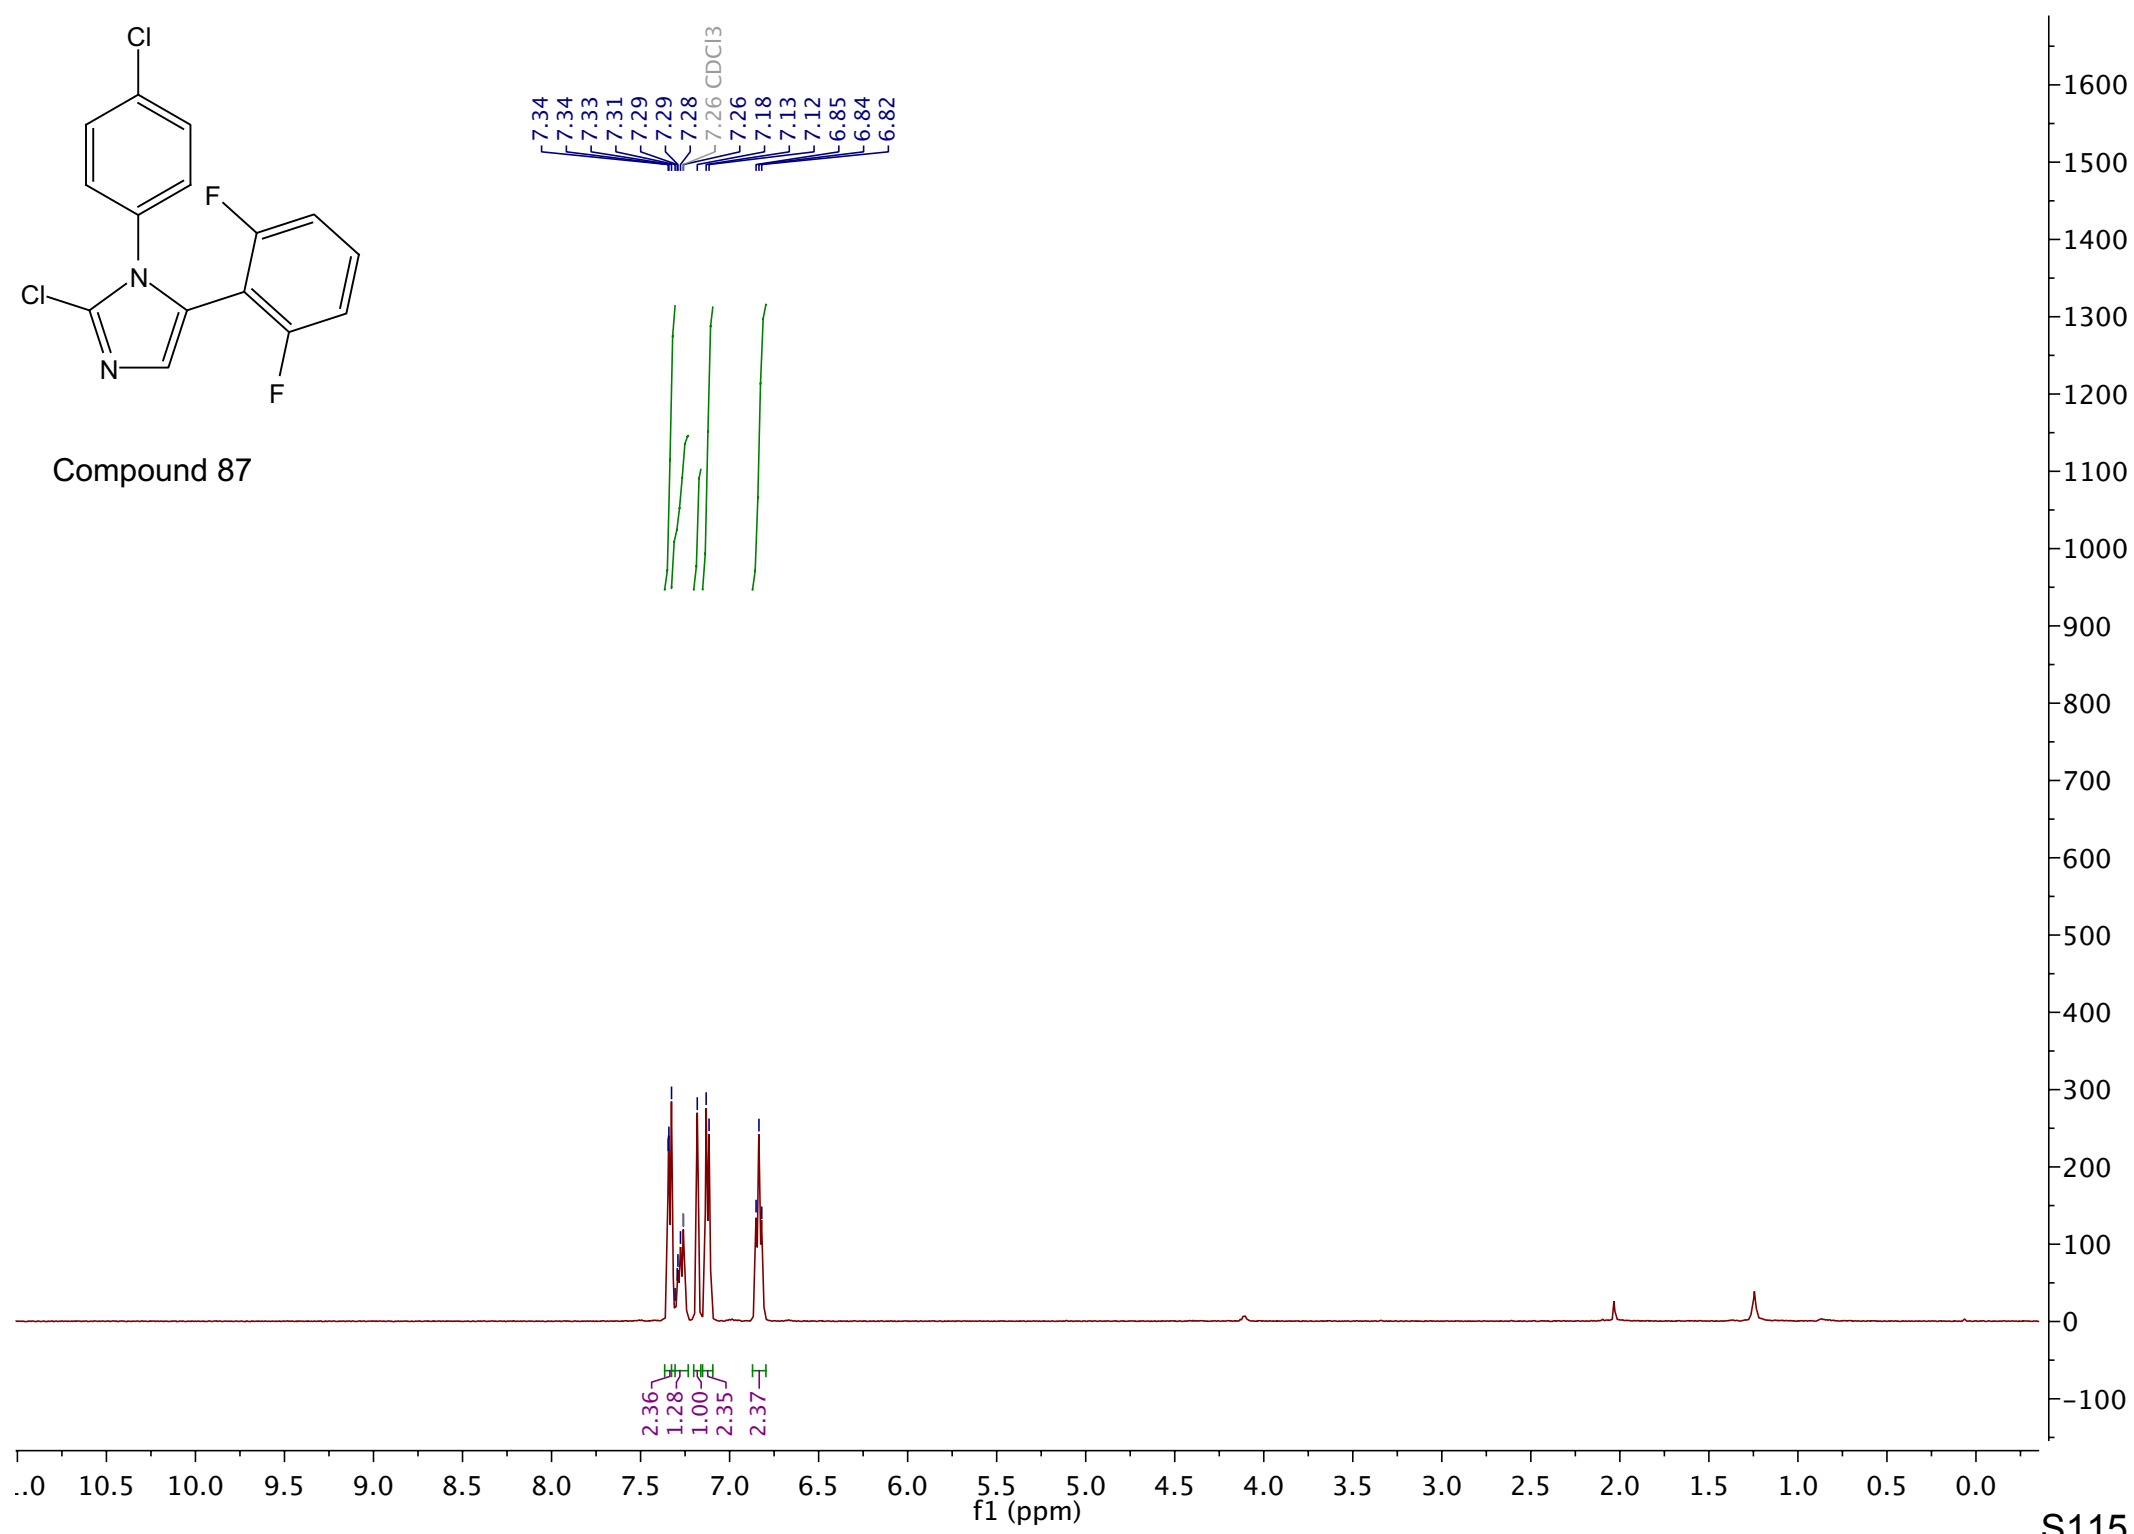

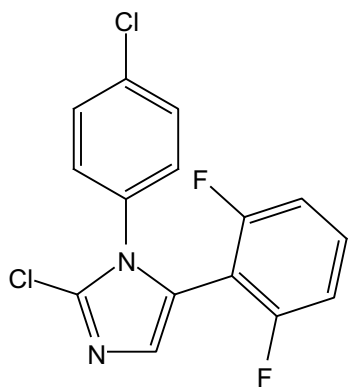

Compound 87

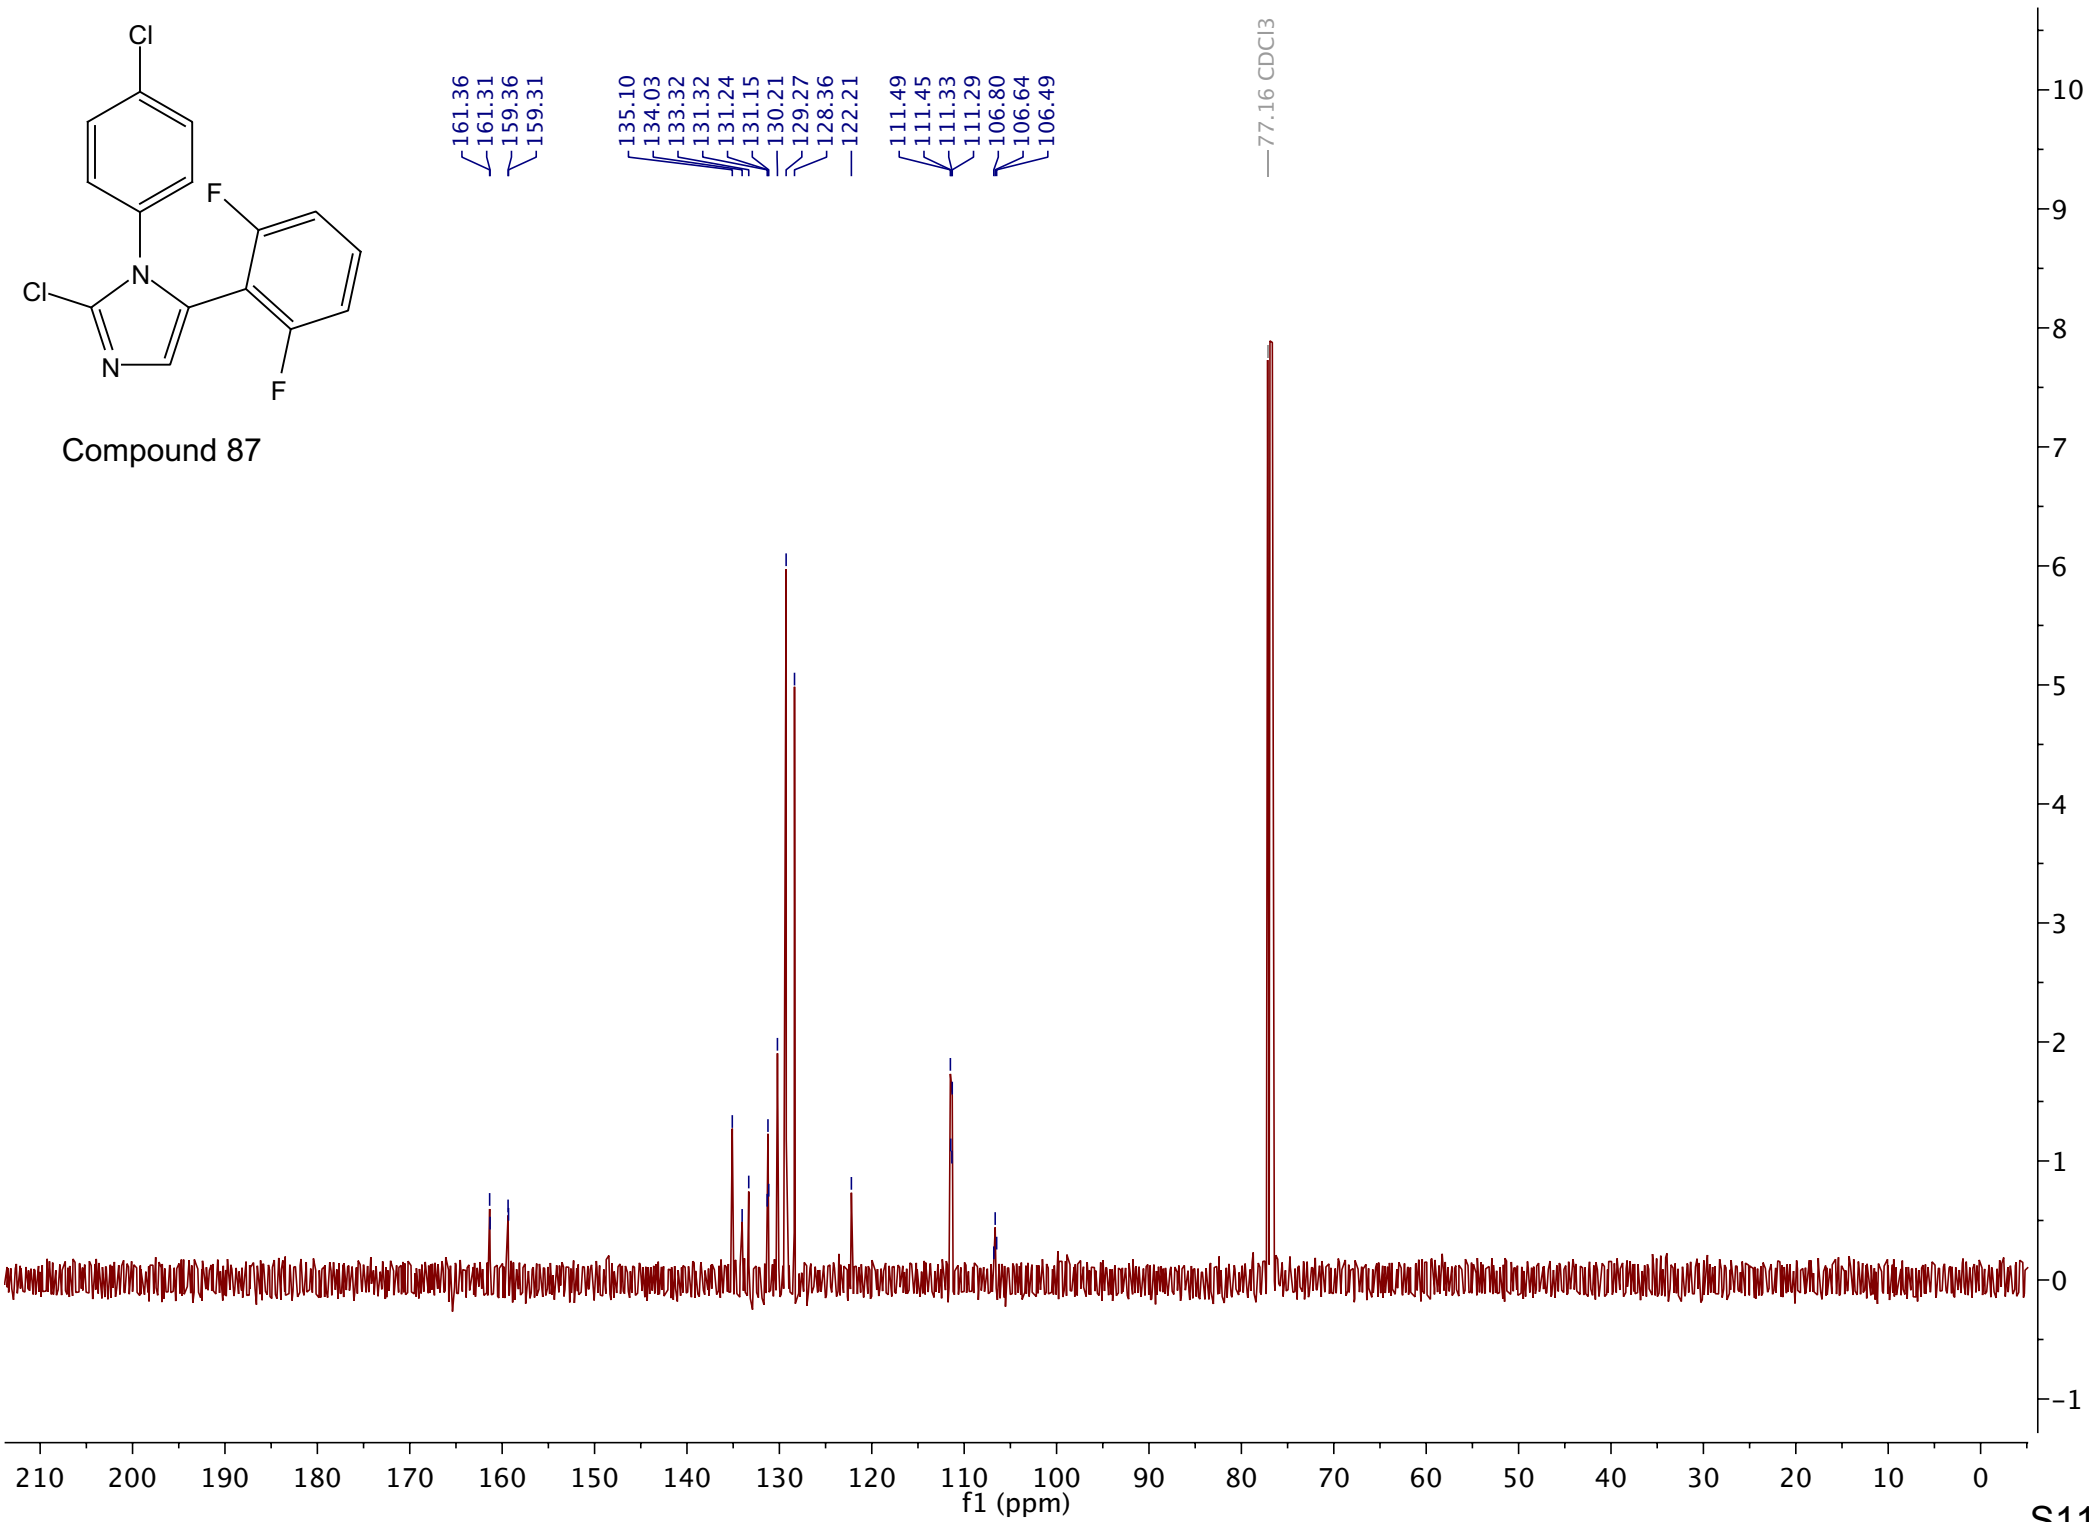

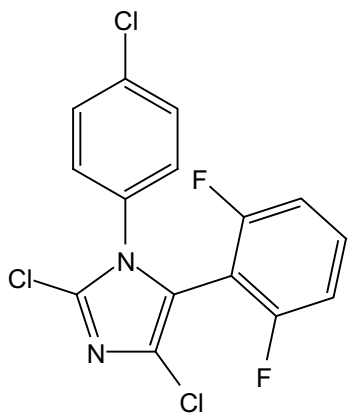

Compound 88

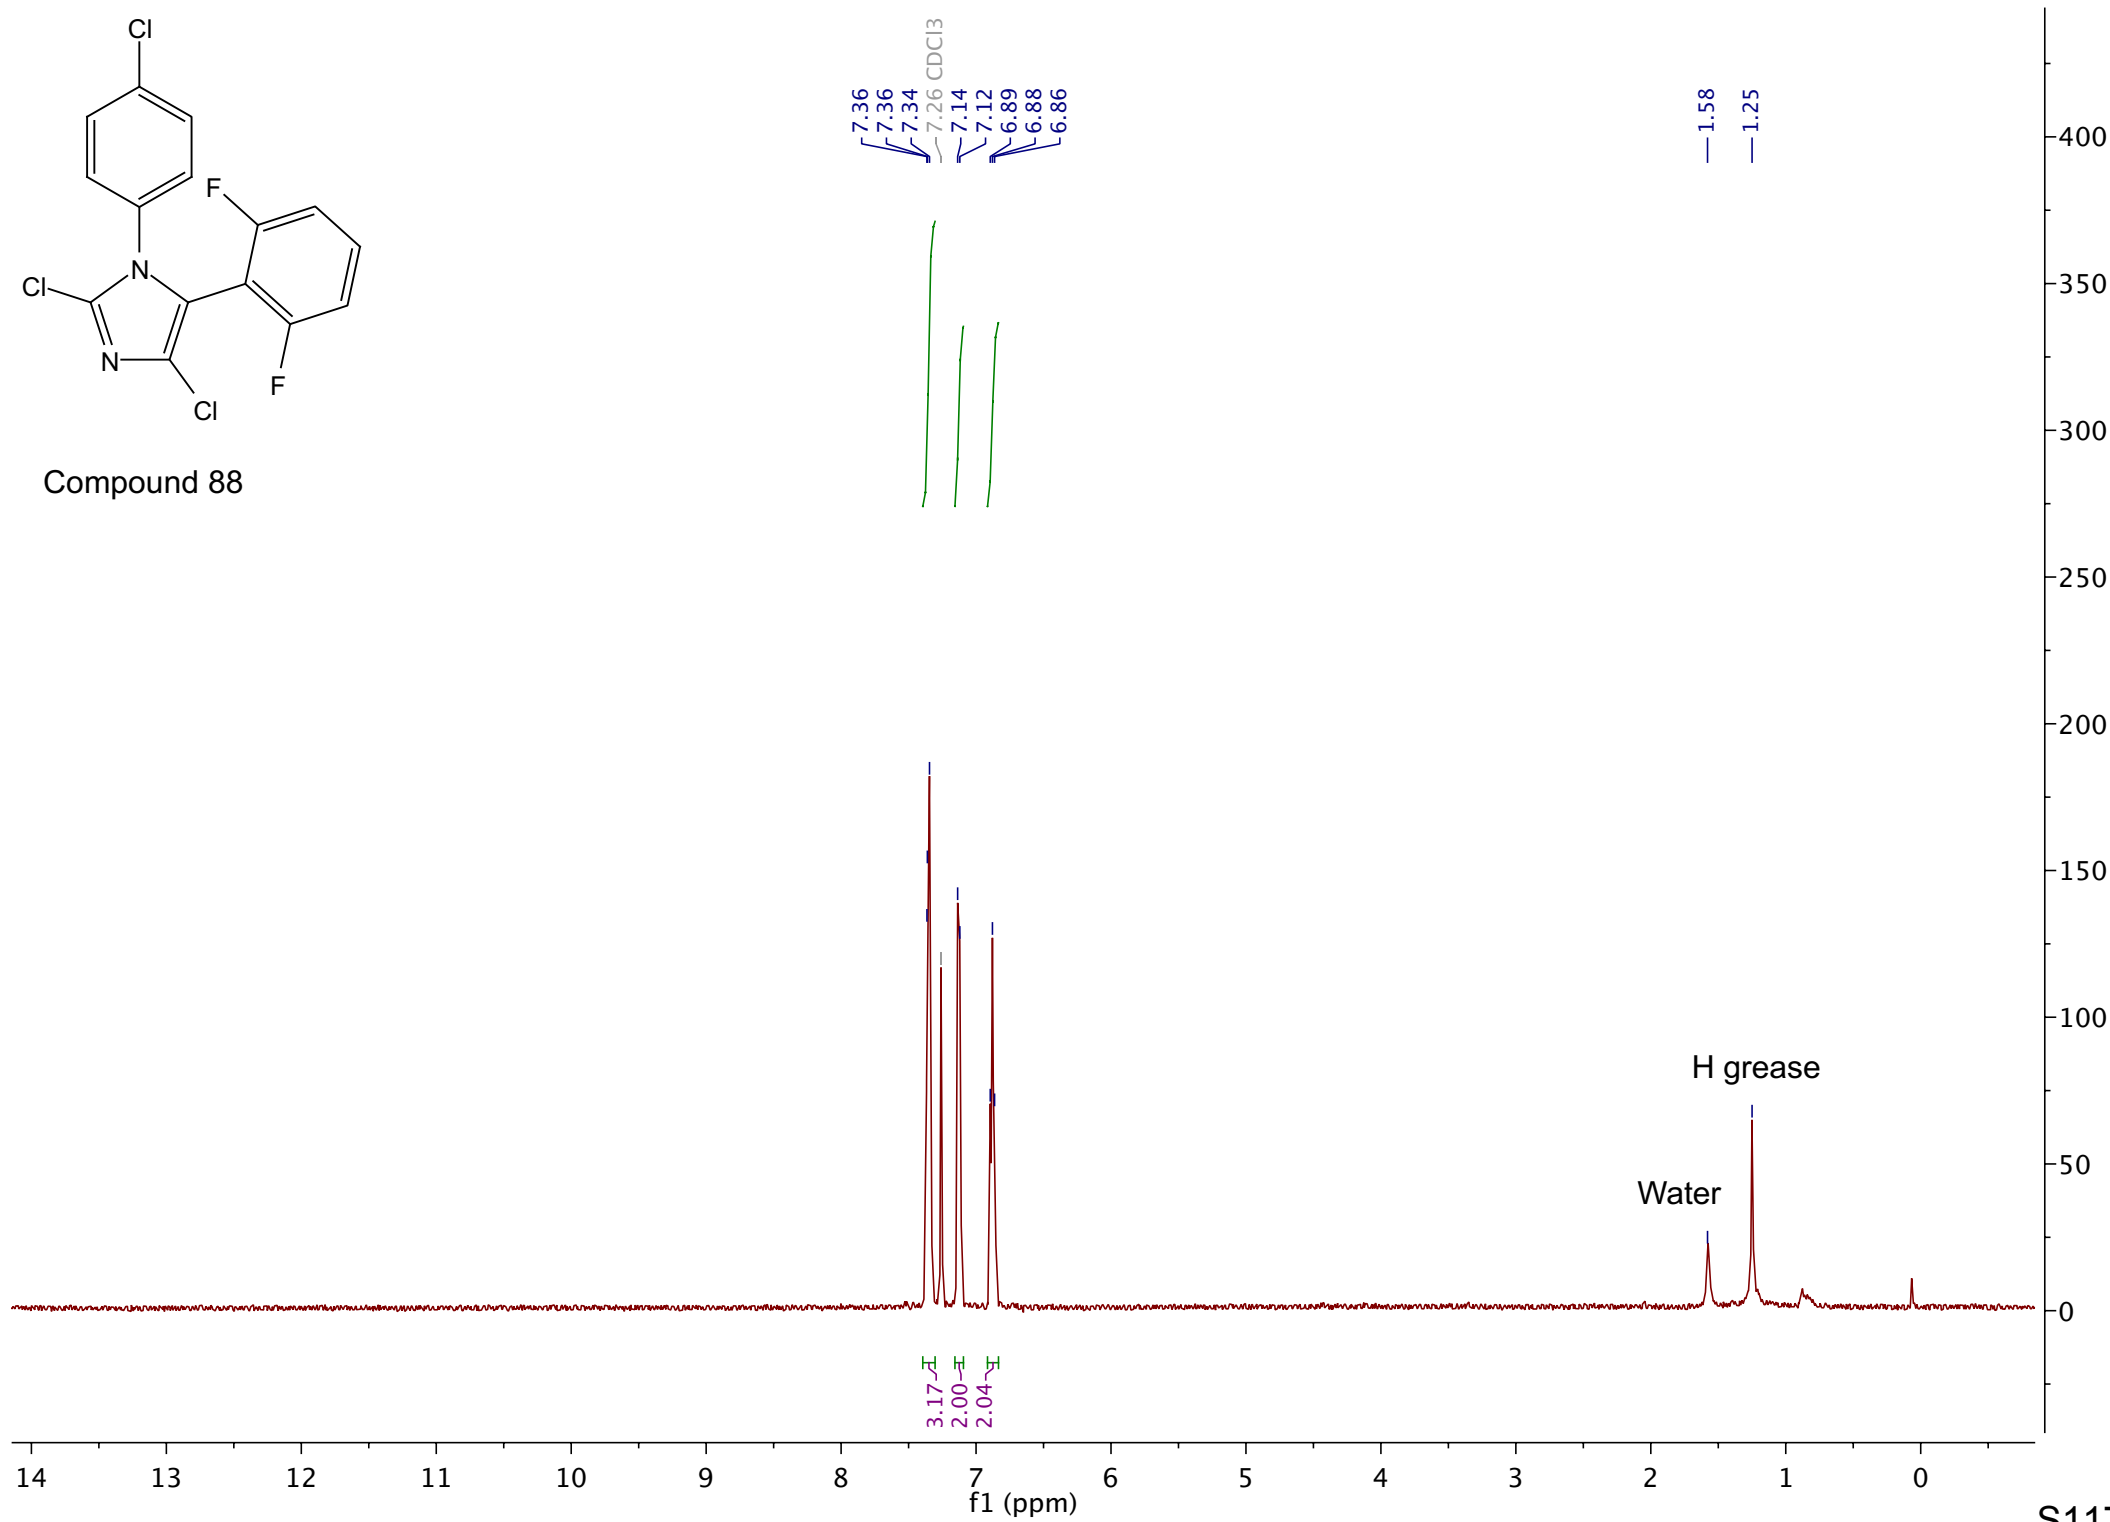



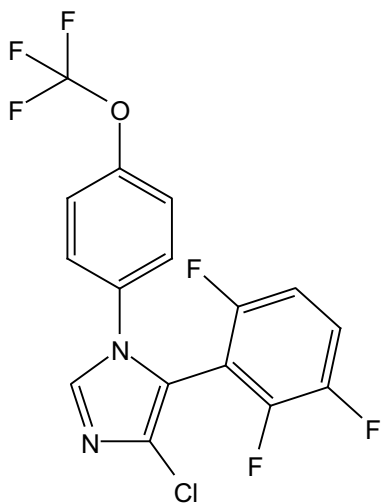

Compound 89

7.72  
7.26 CDCl<sub>3</sub>  
7.24  
7.23  
7.21  
7.20  
7.19  
7.18  
6.88  
6.87  
6.87  
6.86  
6.86  
6.85  
6.84  
6.84  
6.83

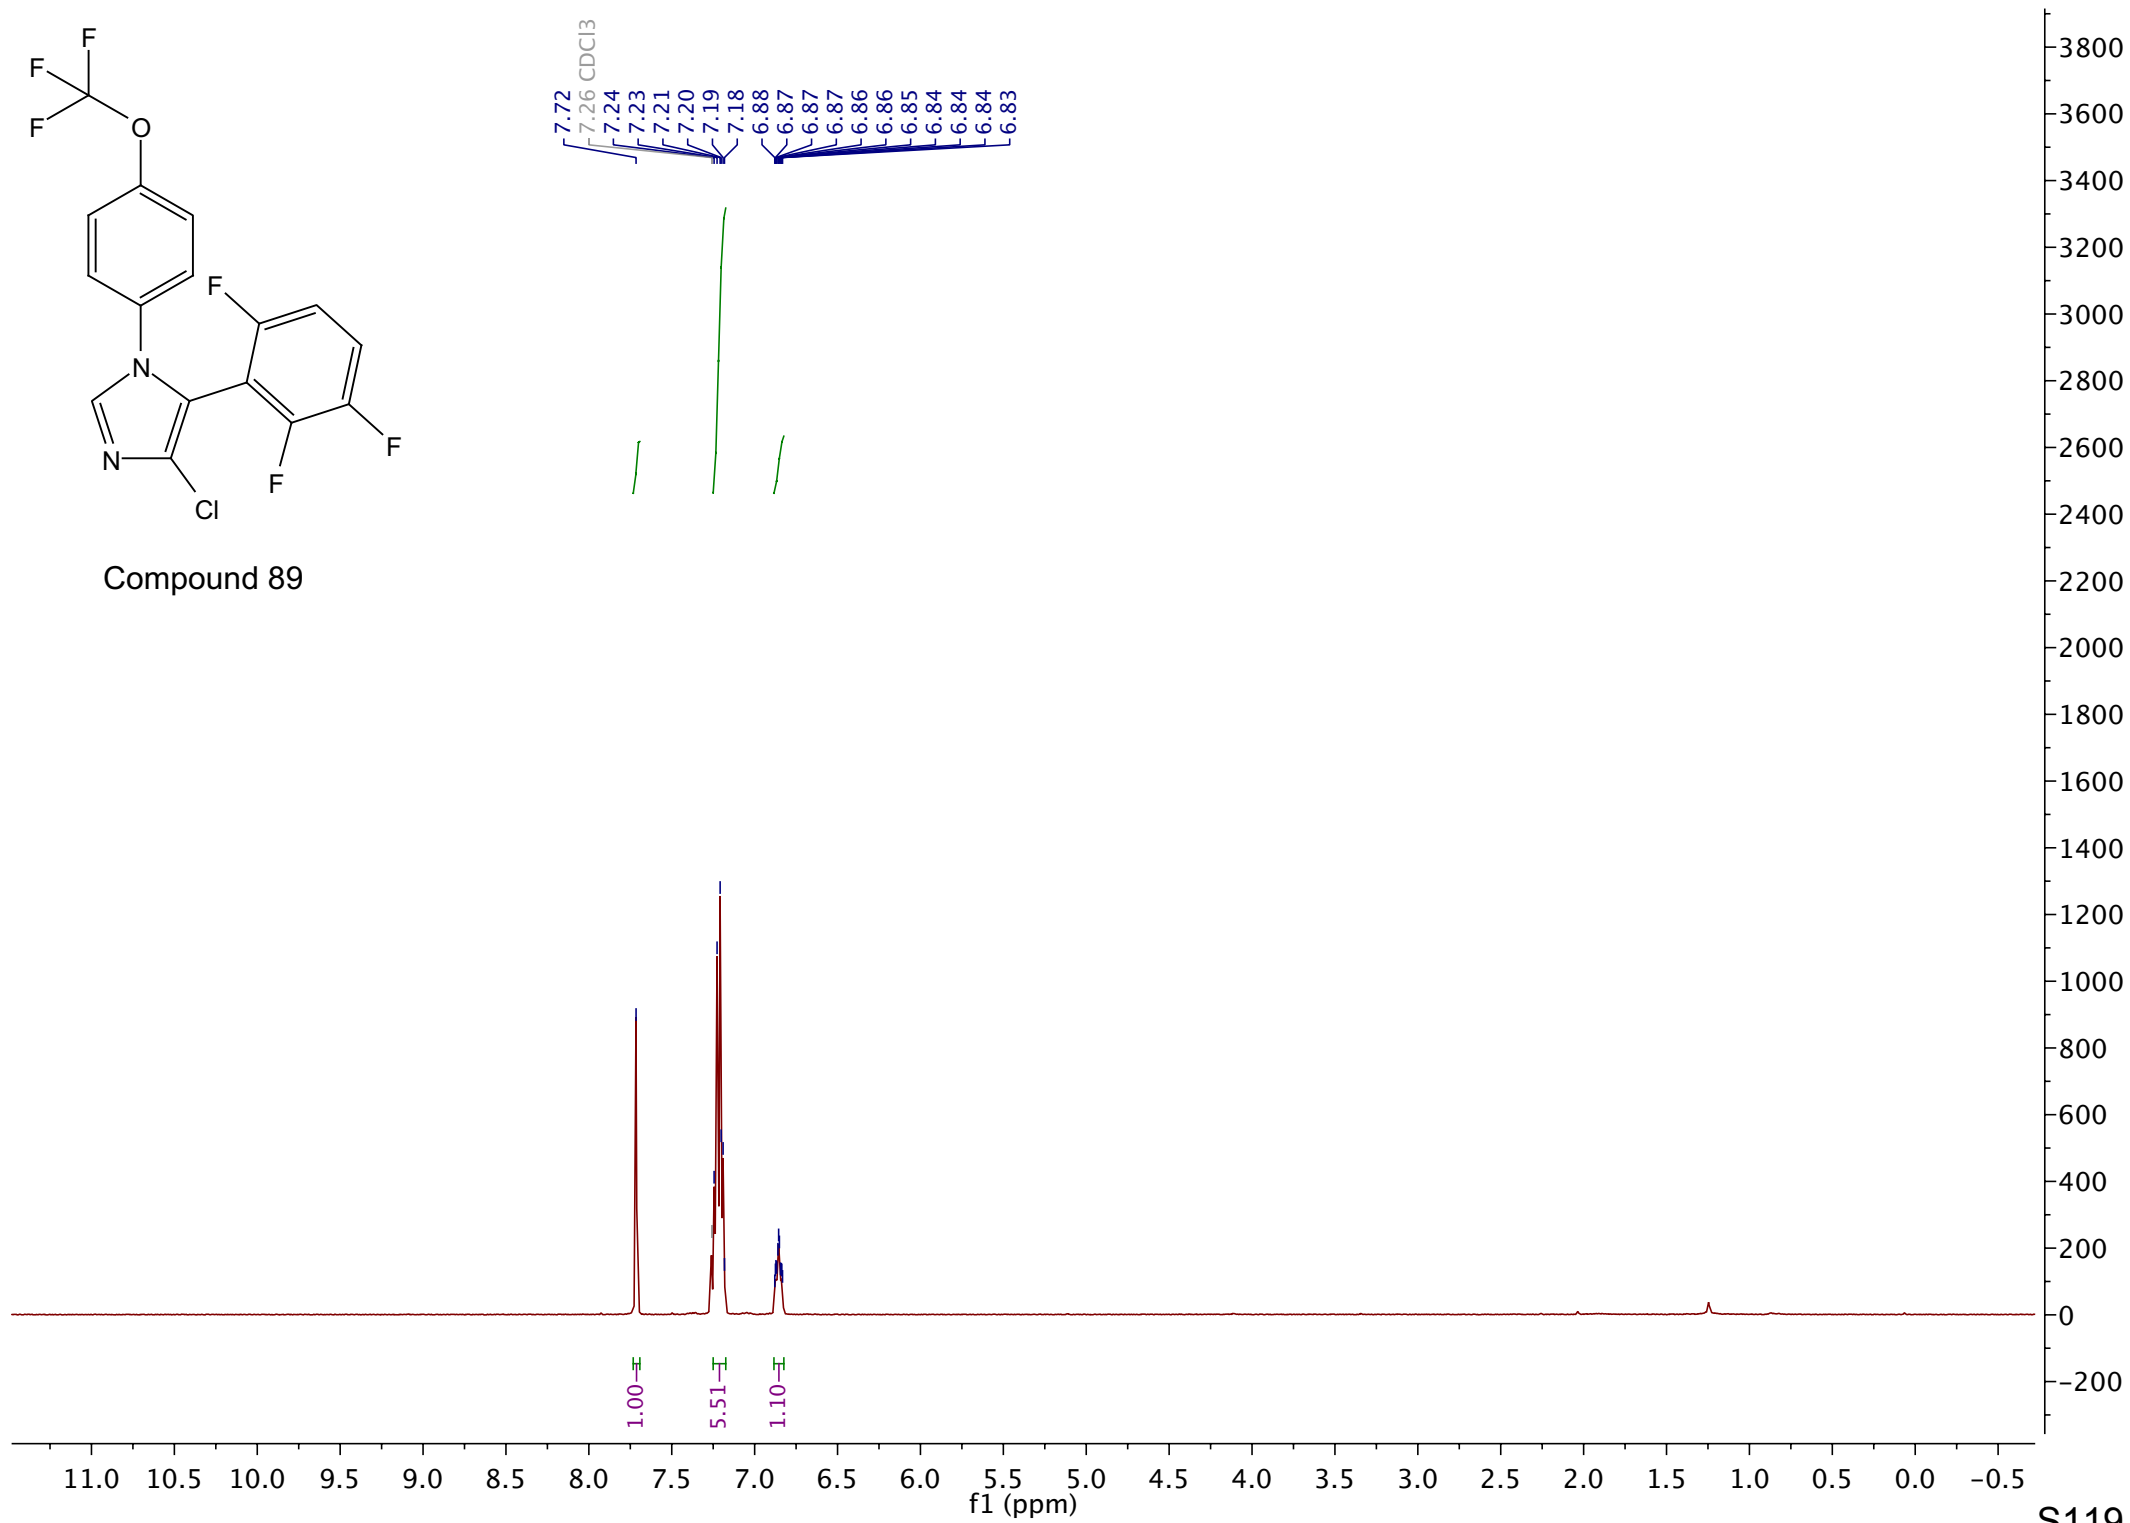

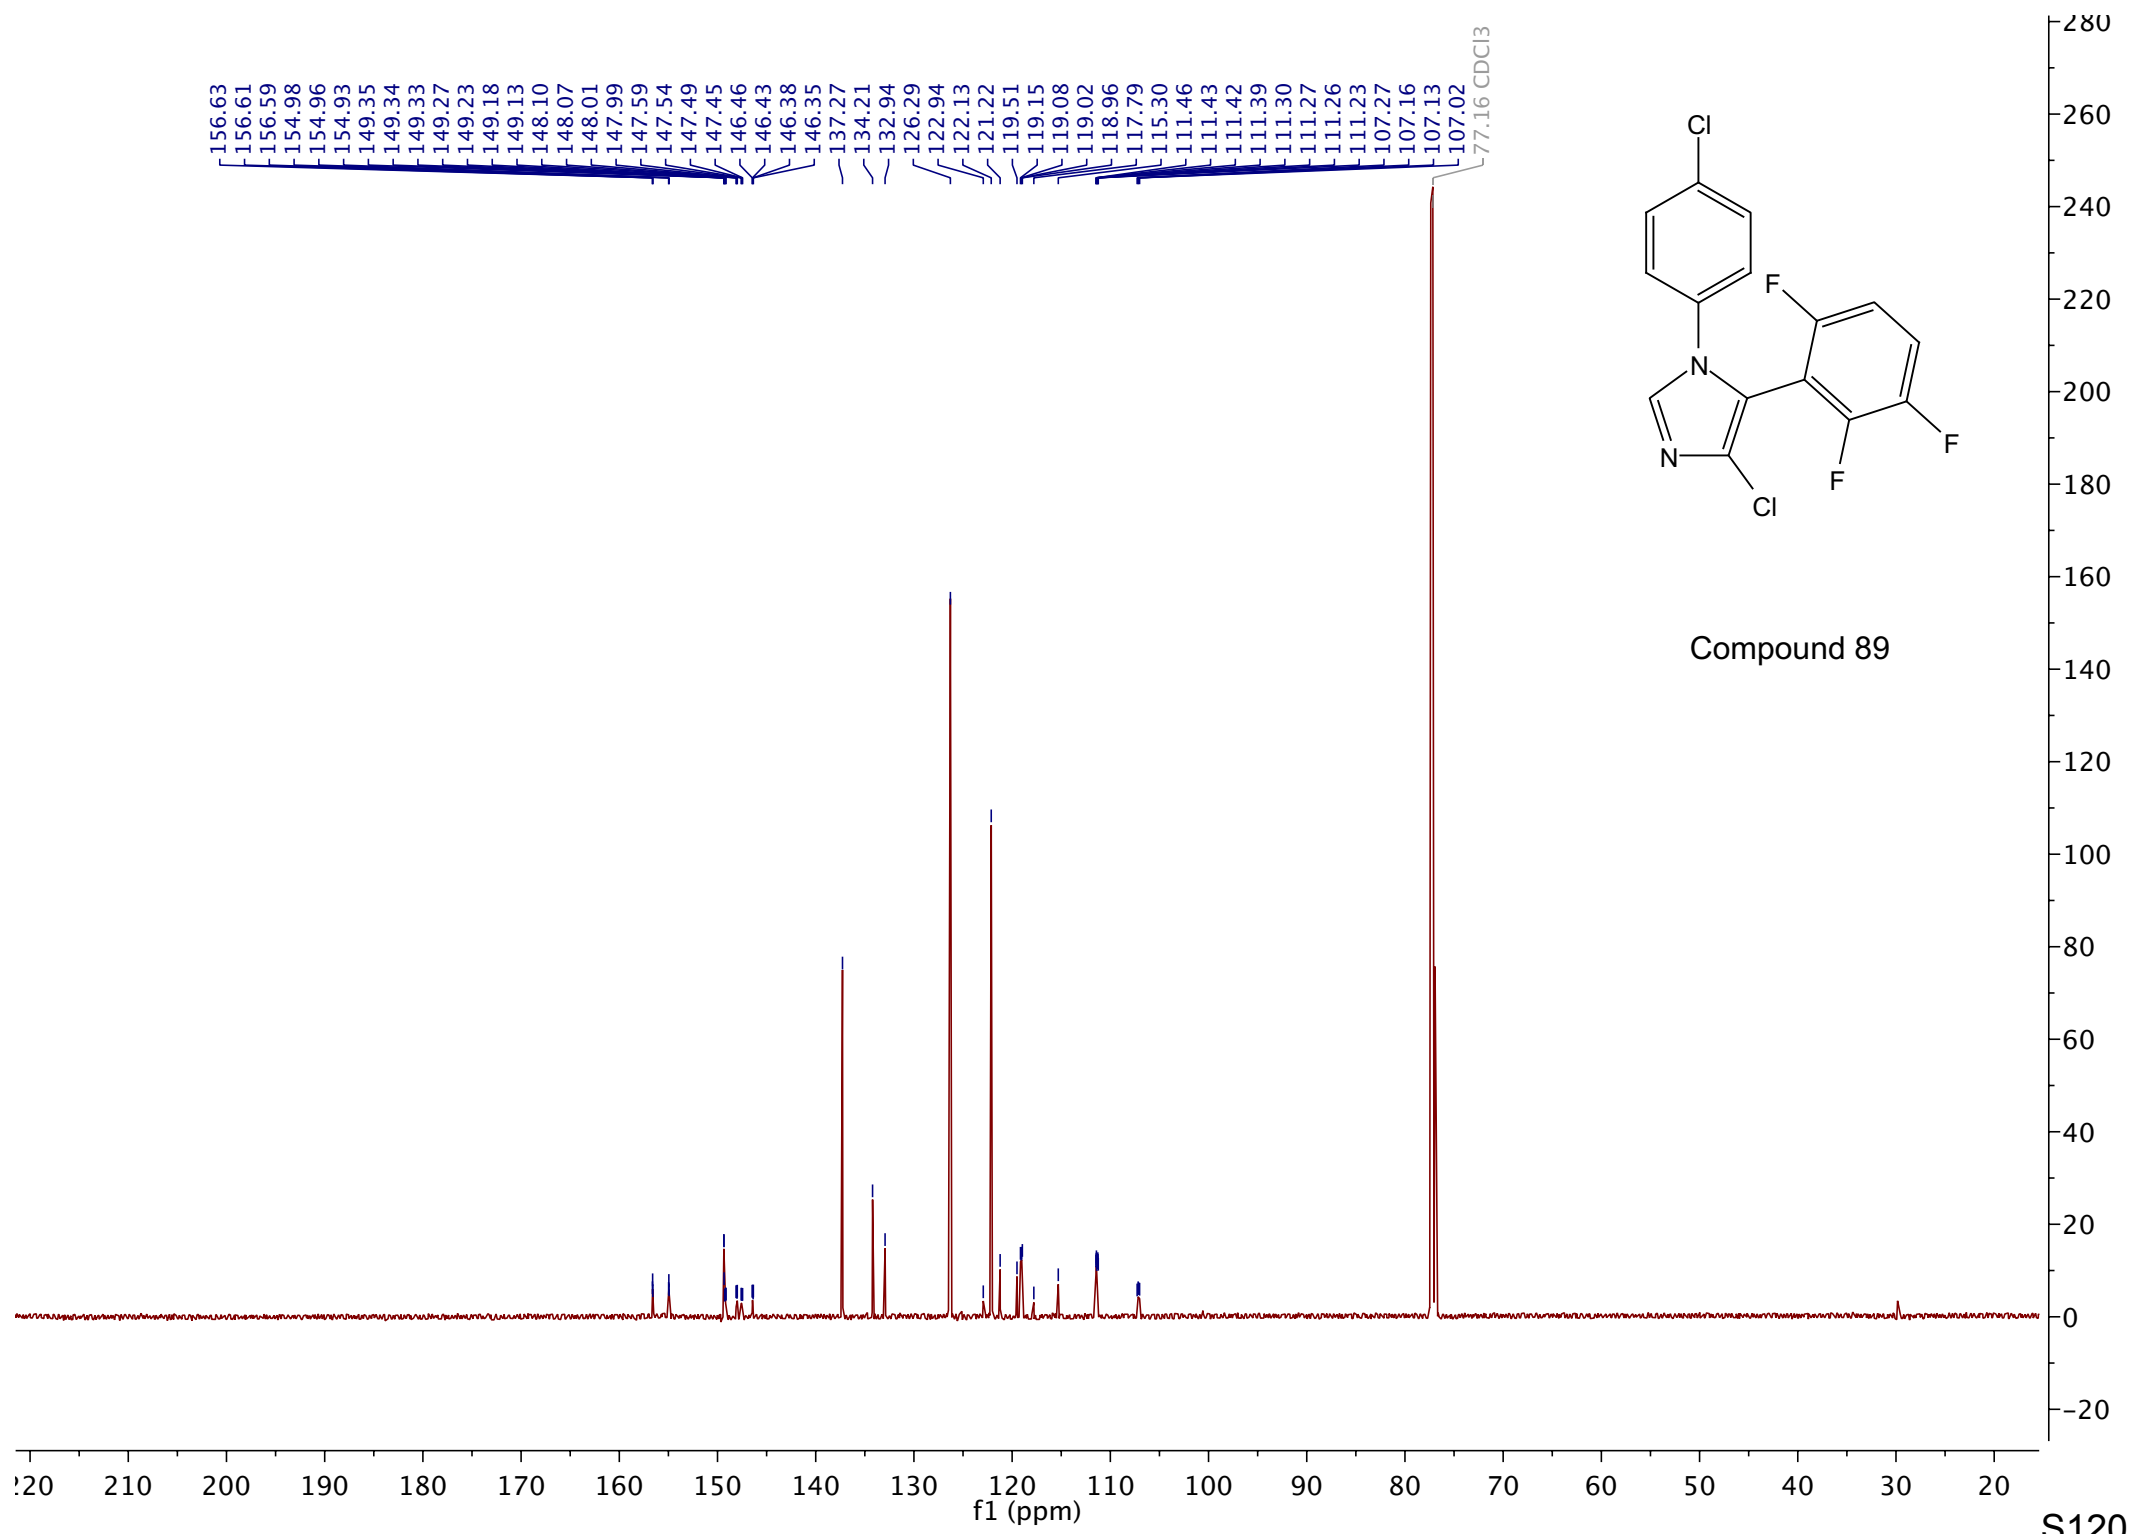



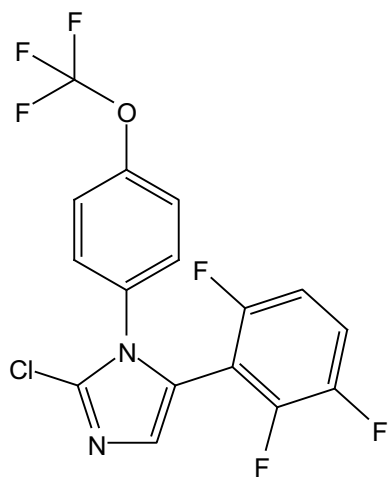

Compound 90

7.27  
7.26  
7.26 CDCl3  
7.19  
7.18  
7.17  
7.16  
7.16  
7.15  
7.14  
7.13  
6.84  
6.84  
6.84  
6.83  
6.83  
6.83  
6.82  
6.82  
6.82  
6.82  
6.81  
6.81  
6.80  
6.80  
6.80

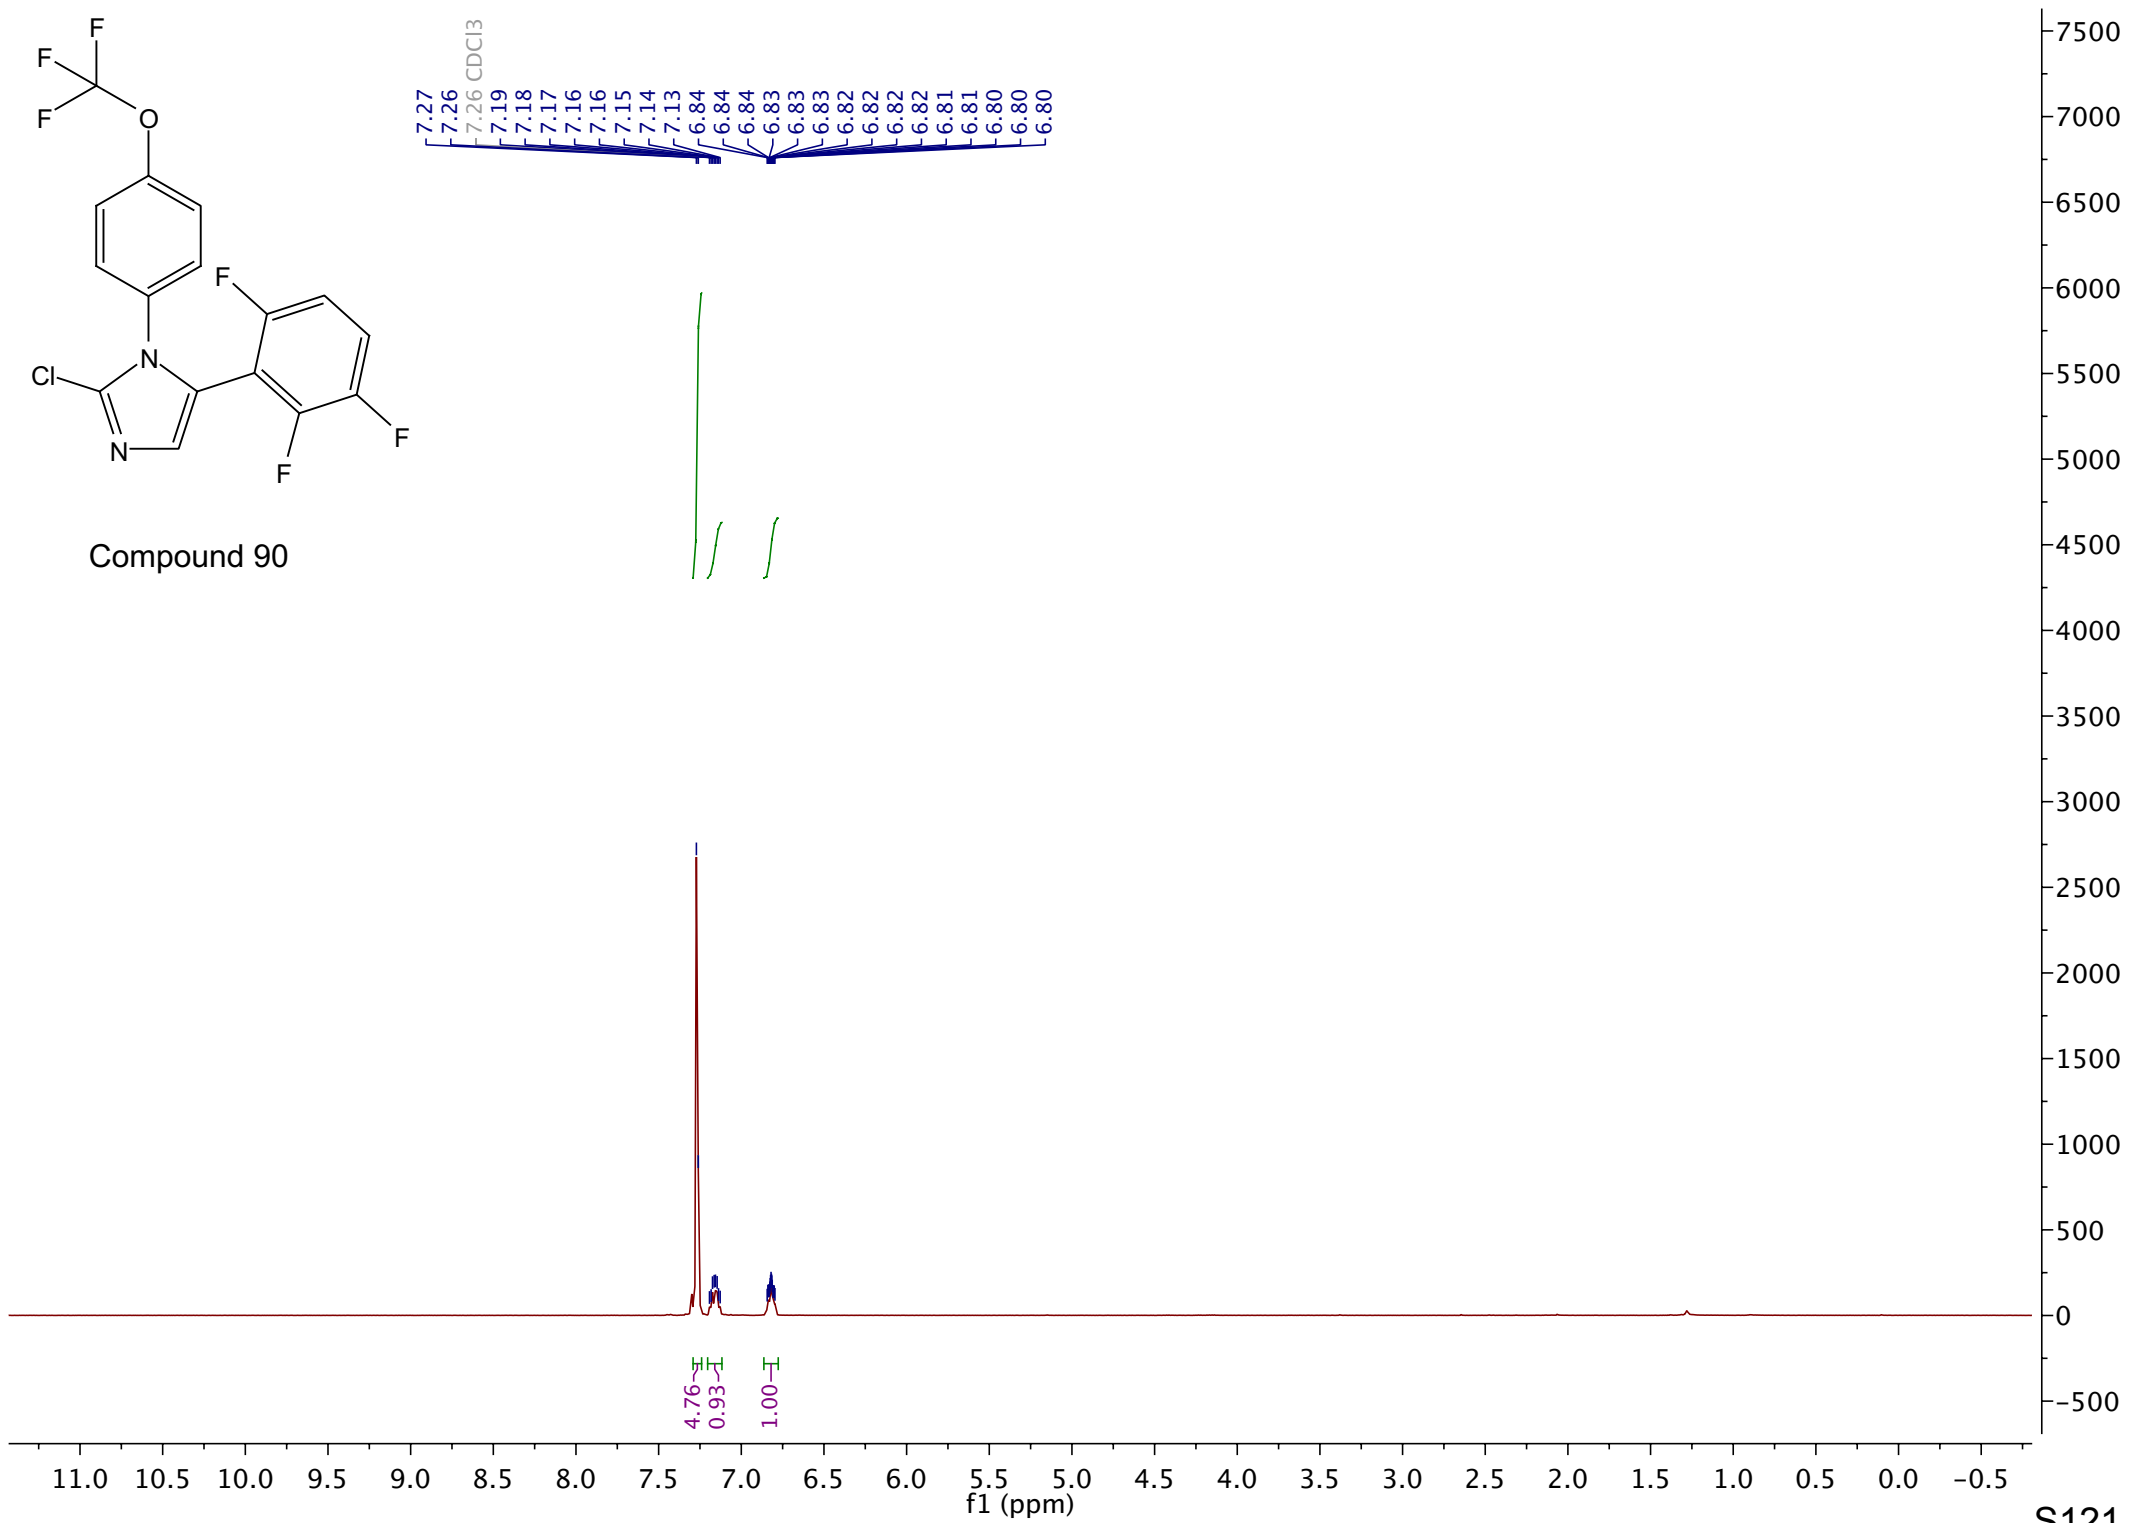

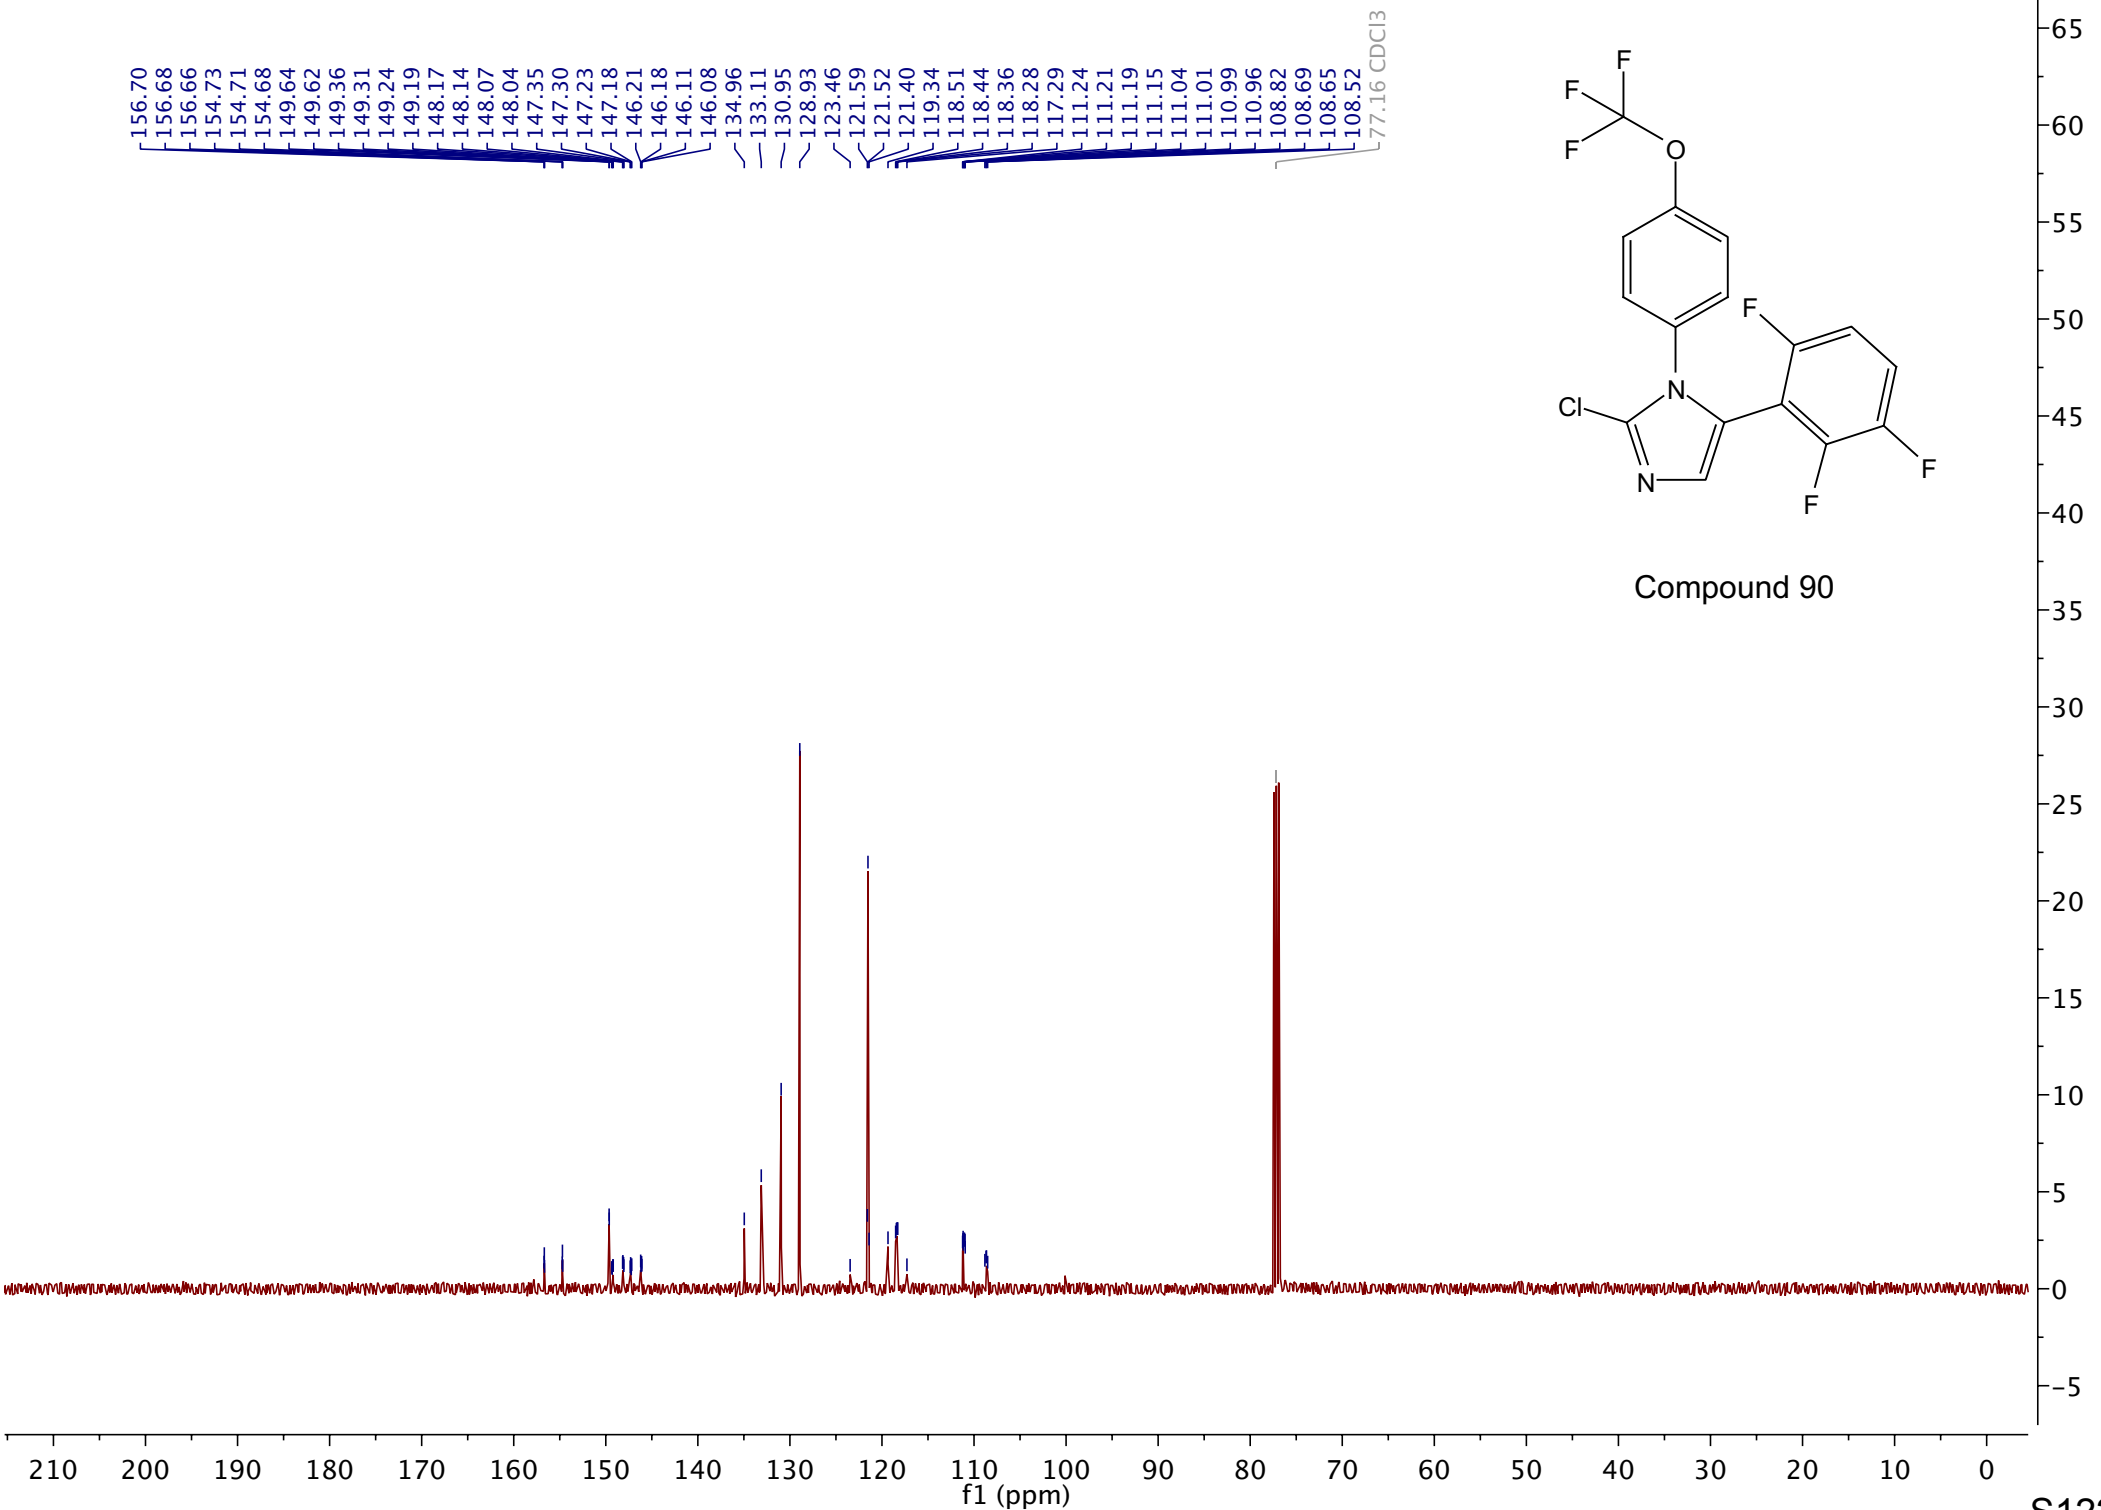

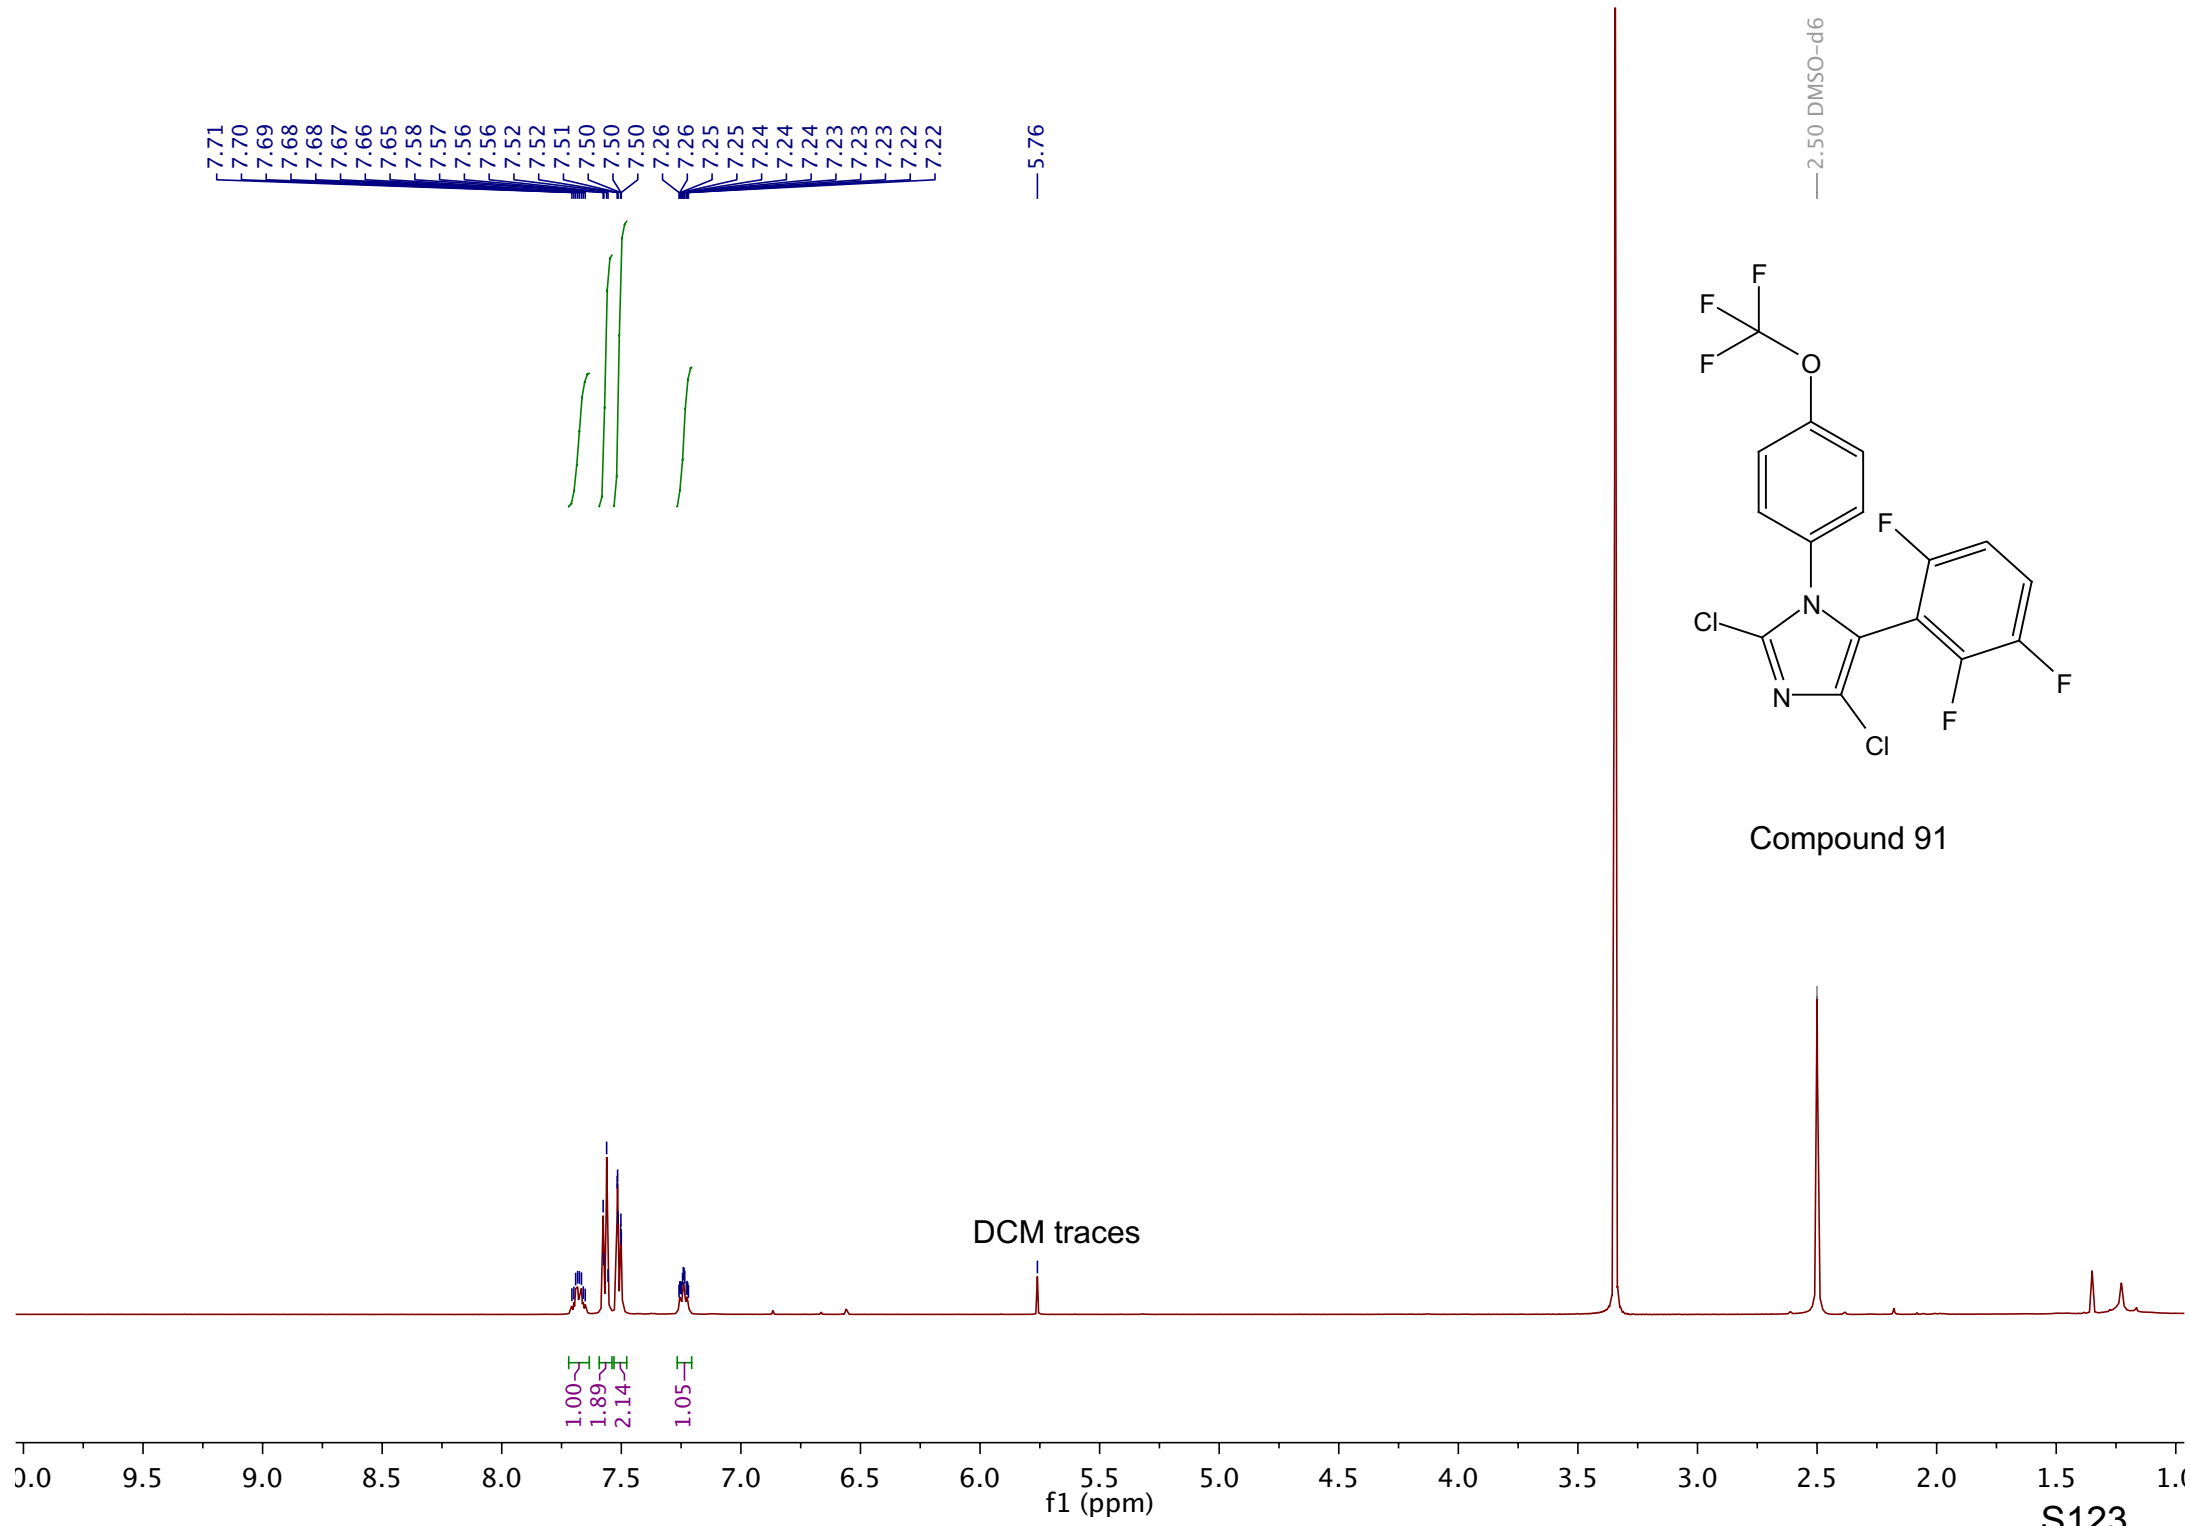

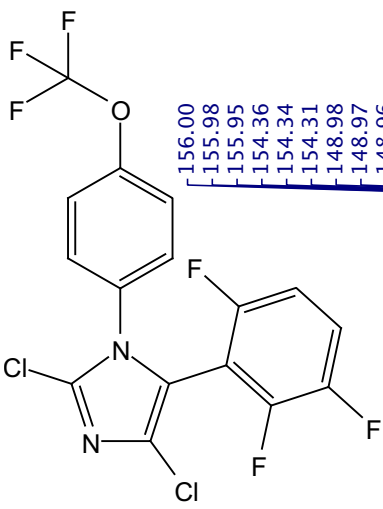

Compound 91

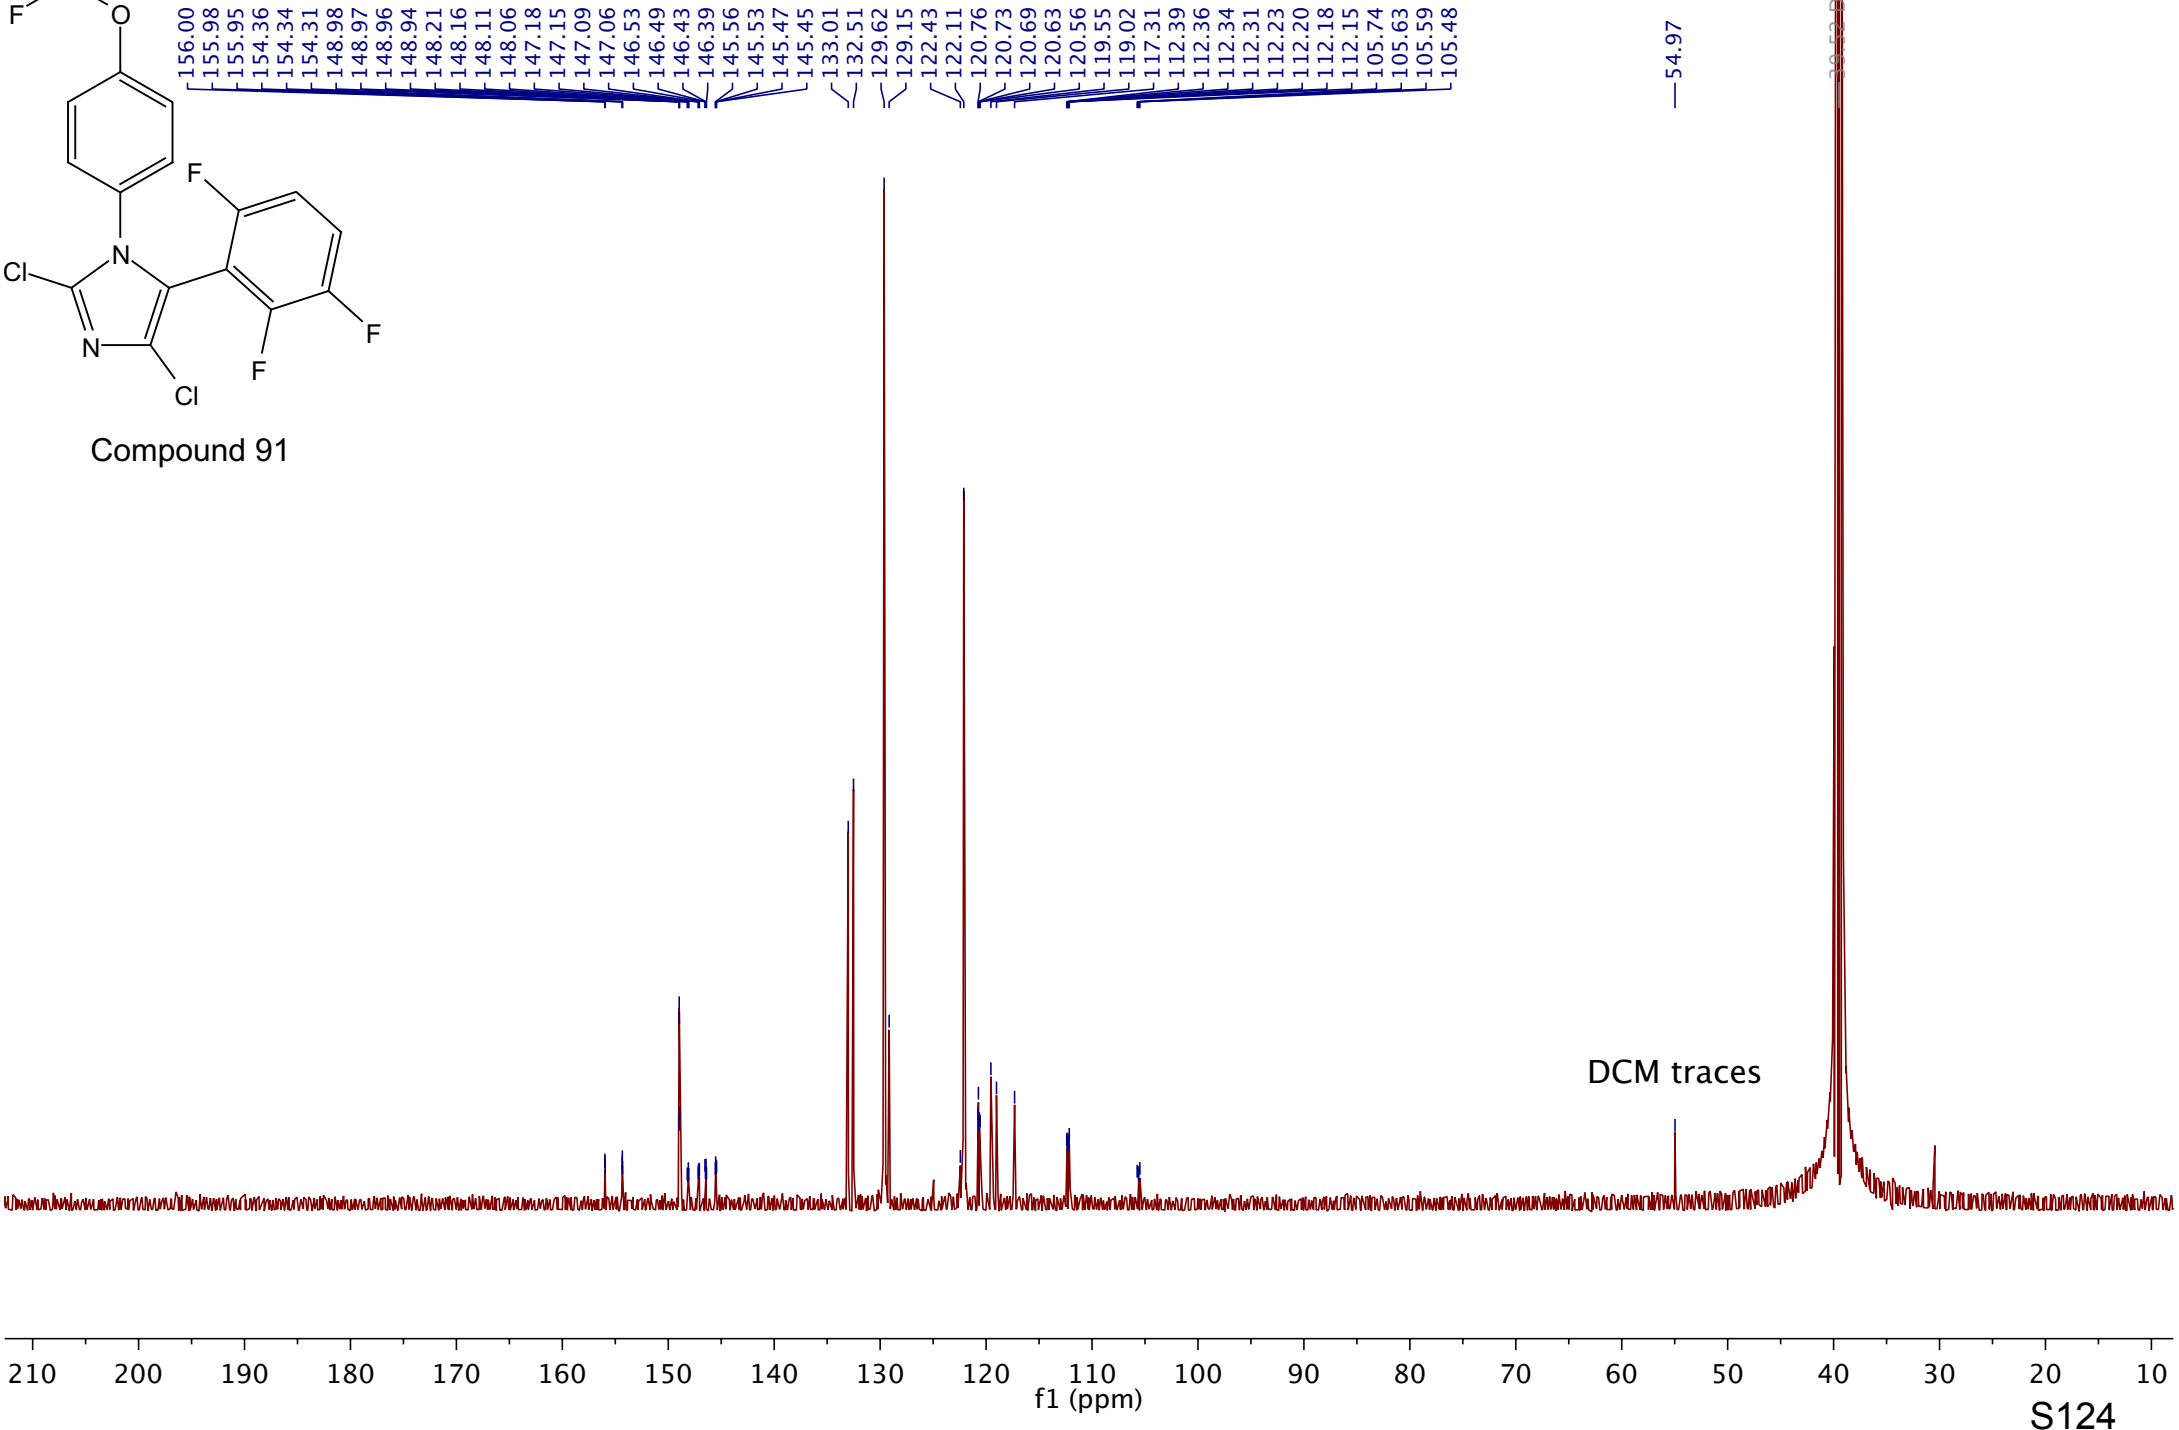

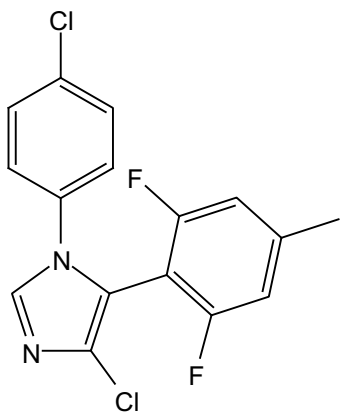

Compound 92

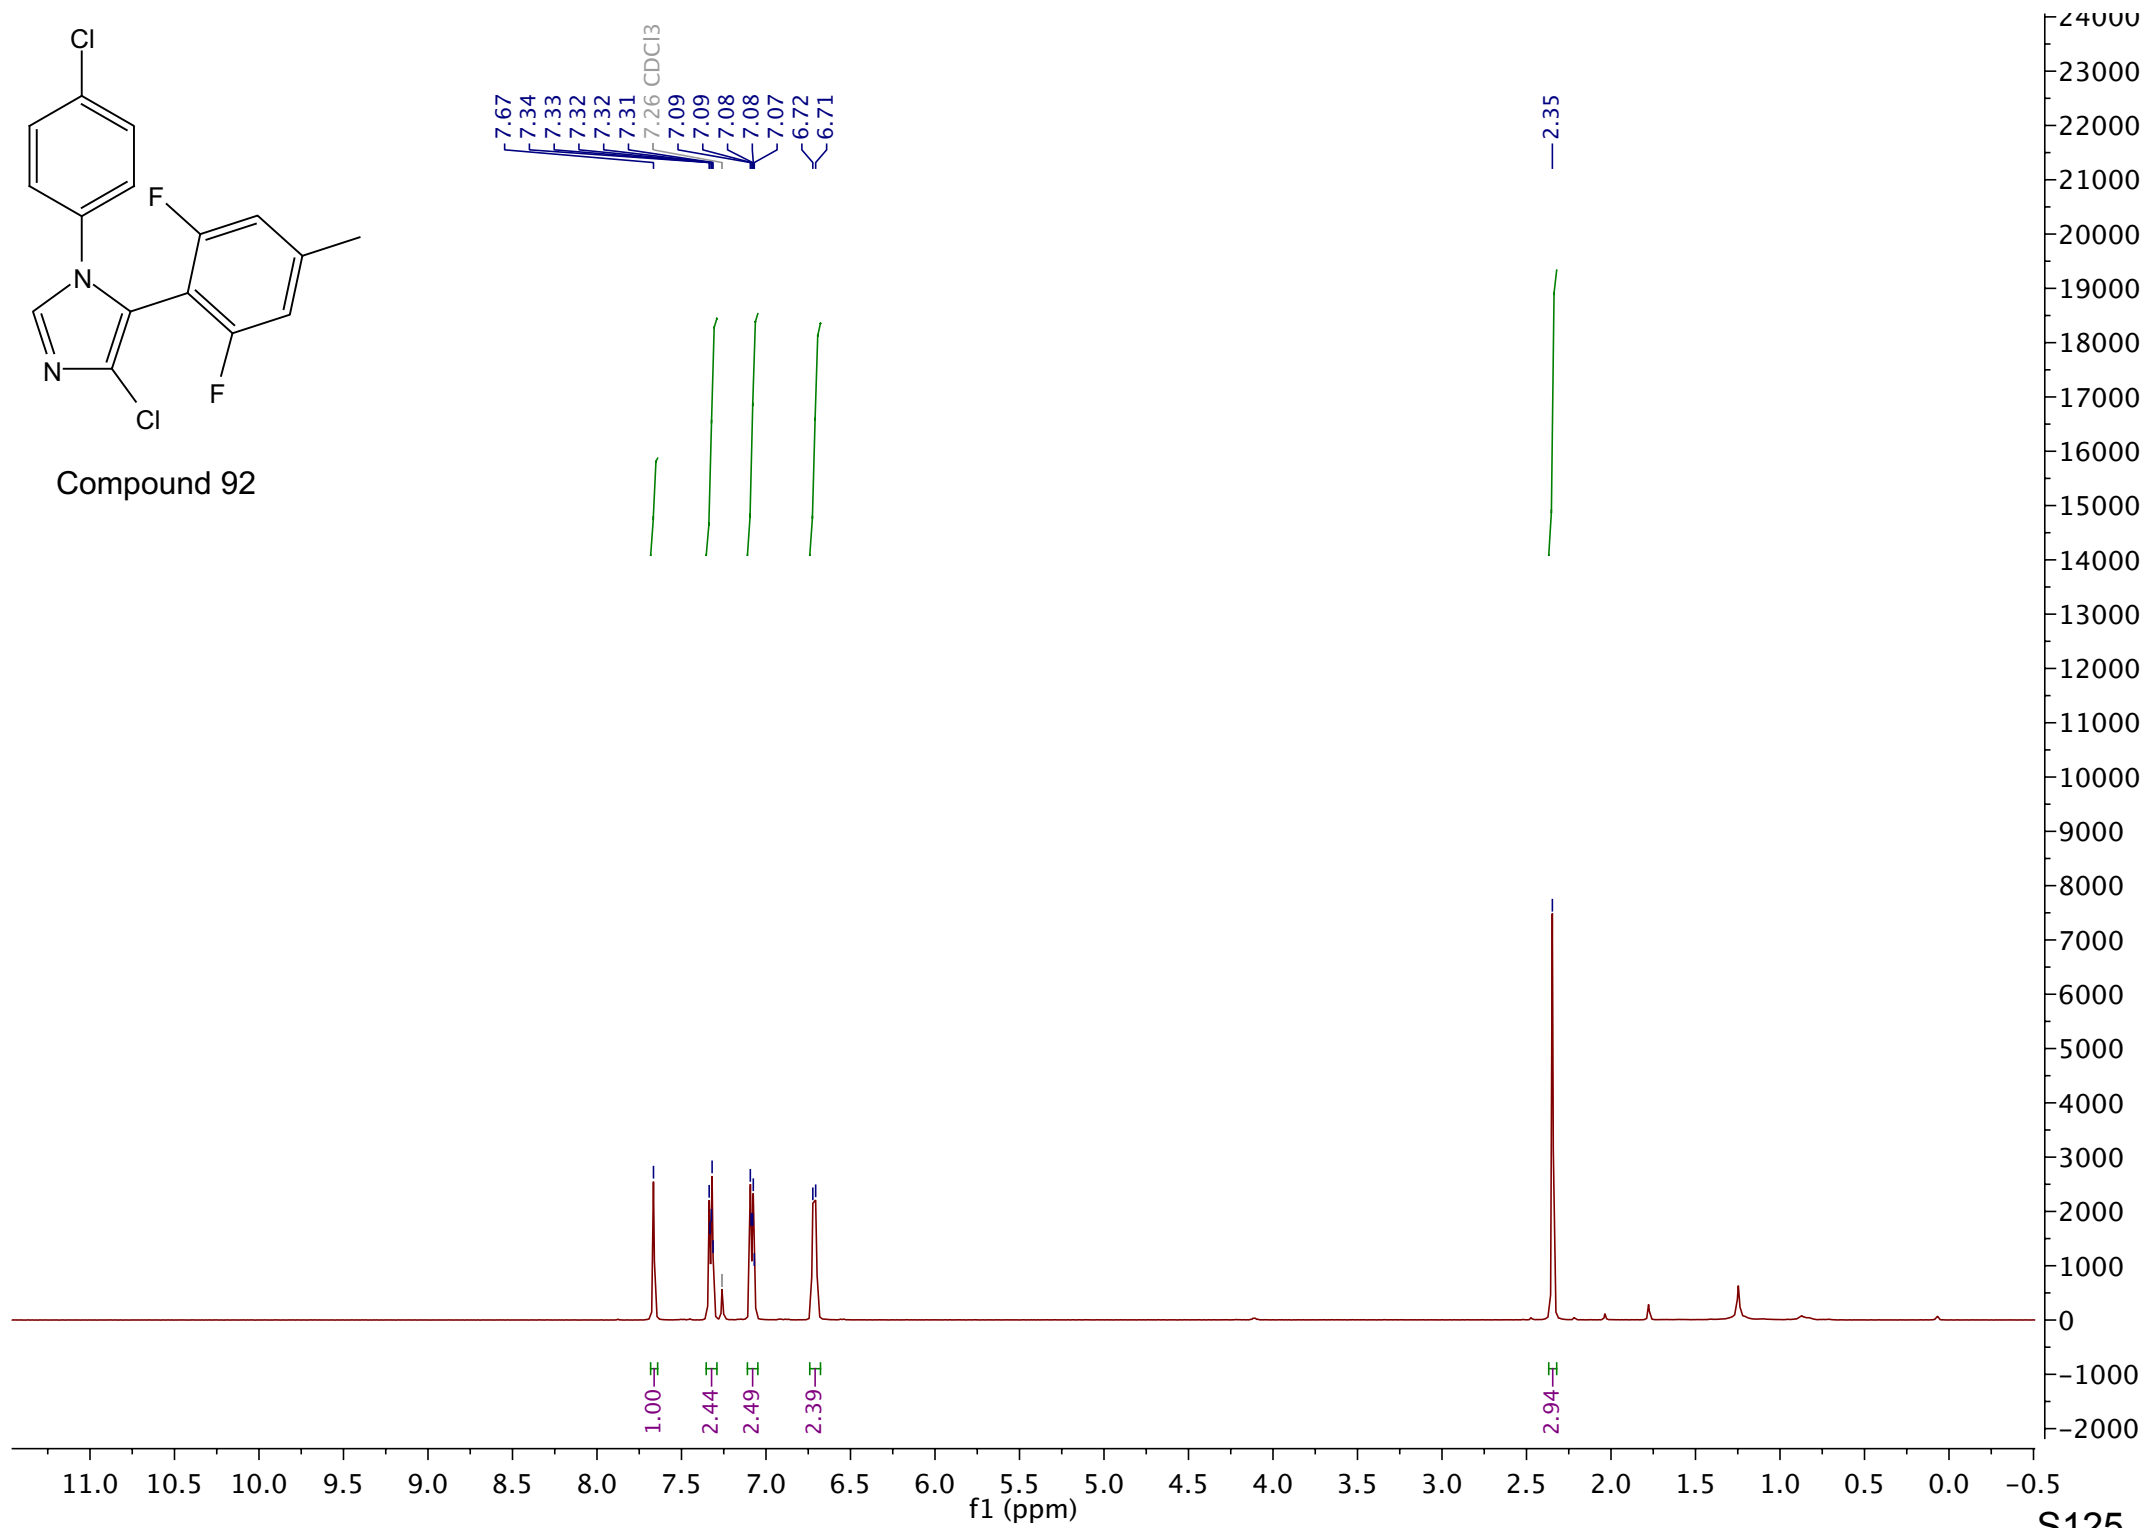

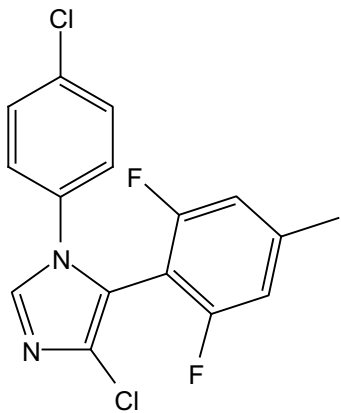

Compound 92

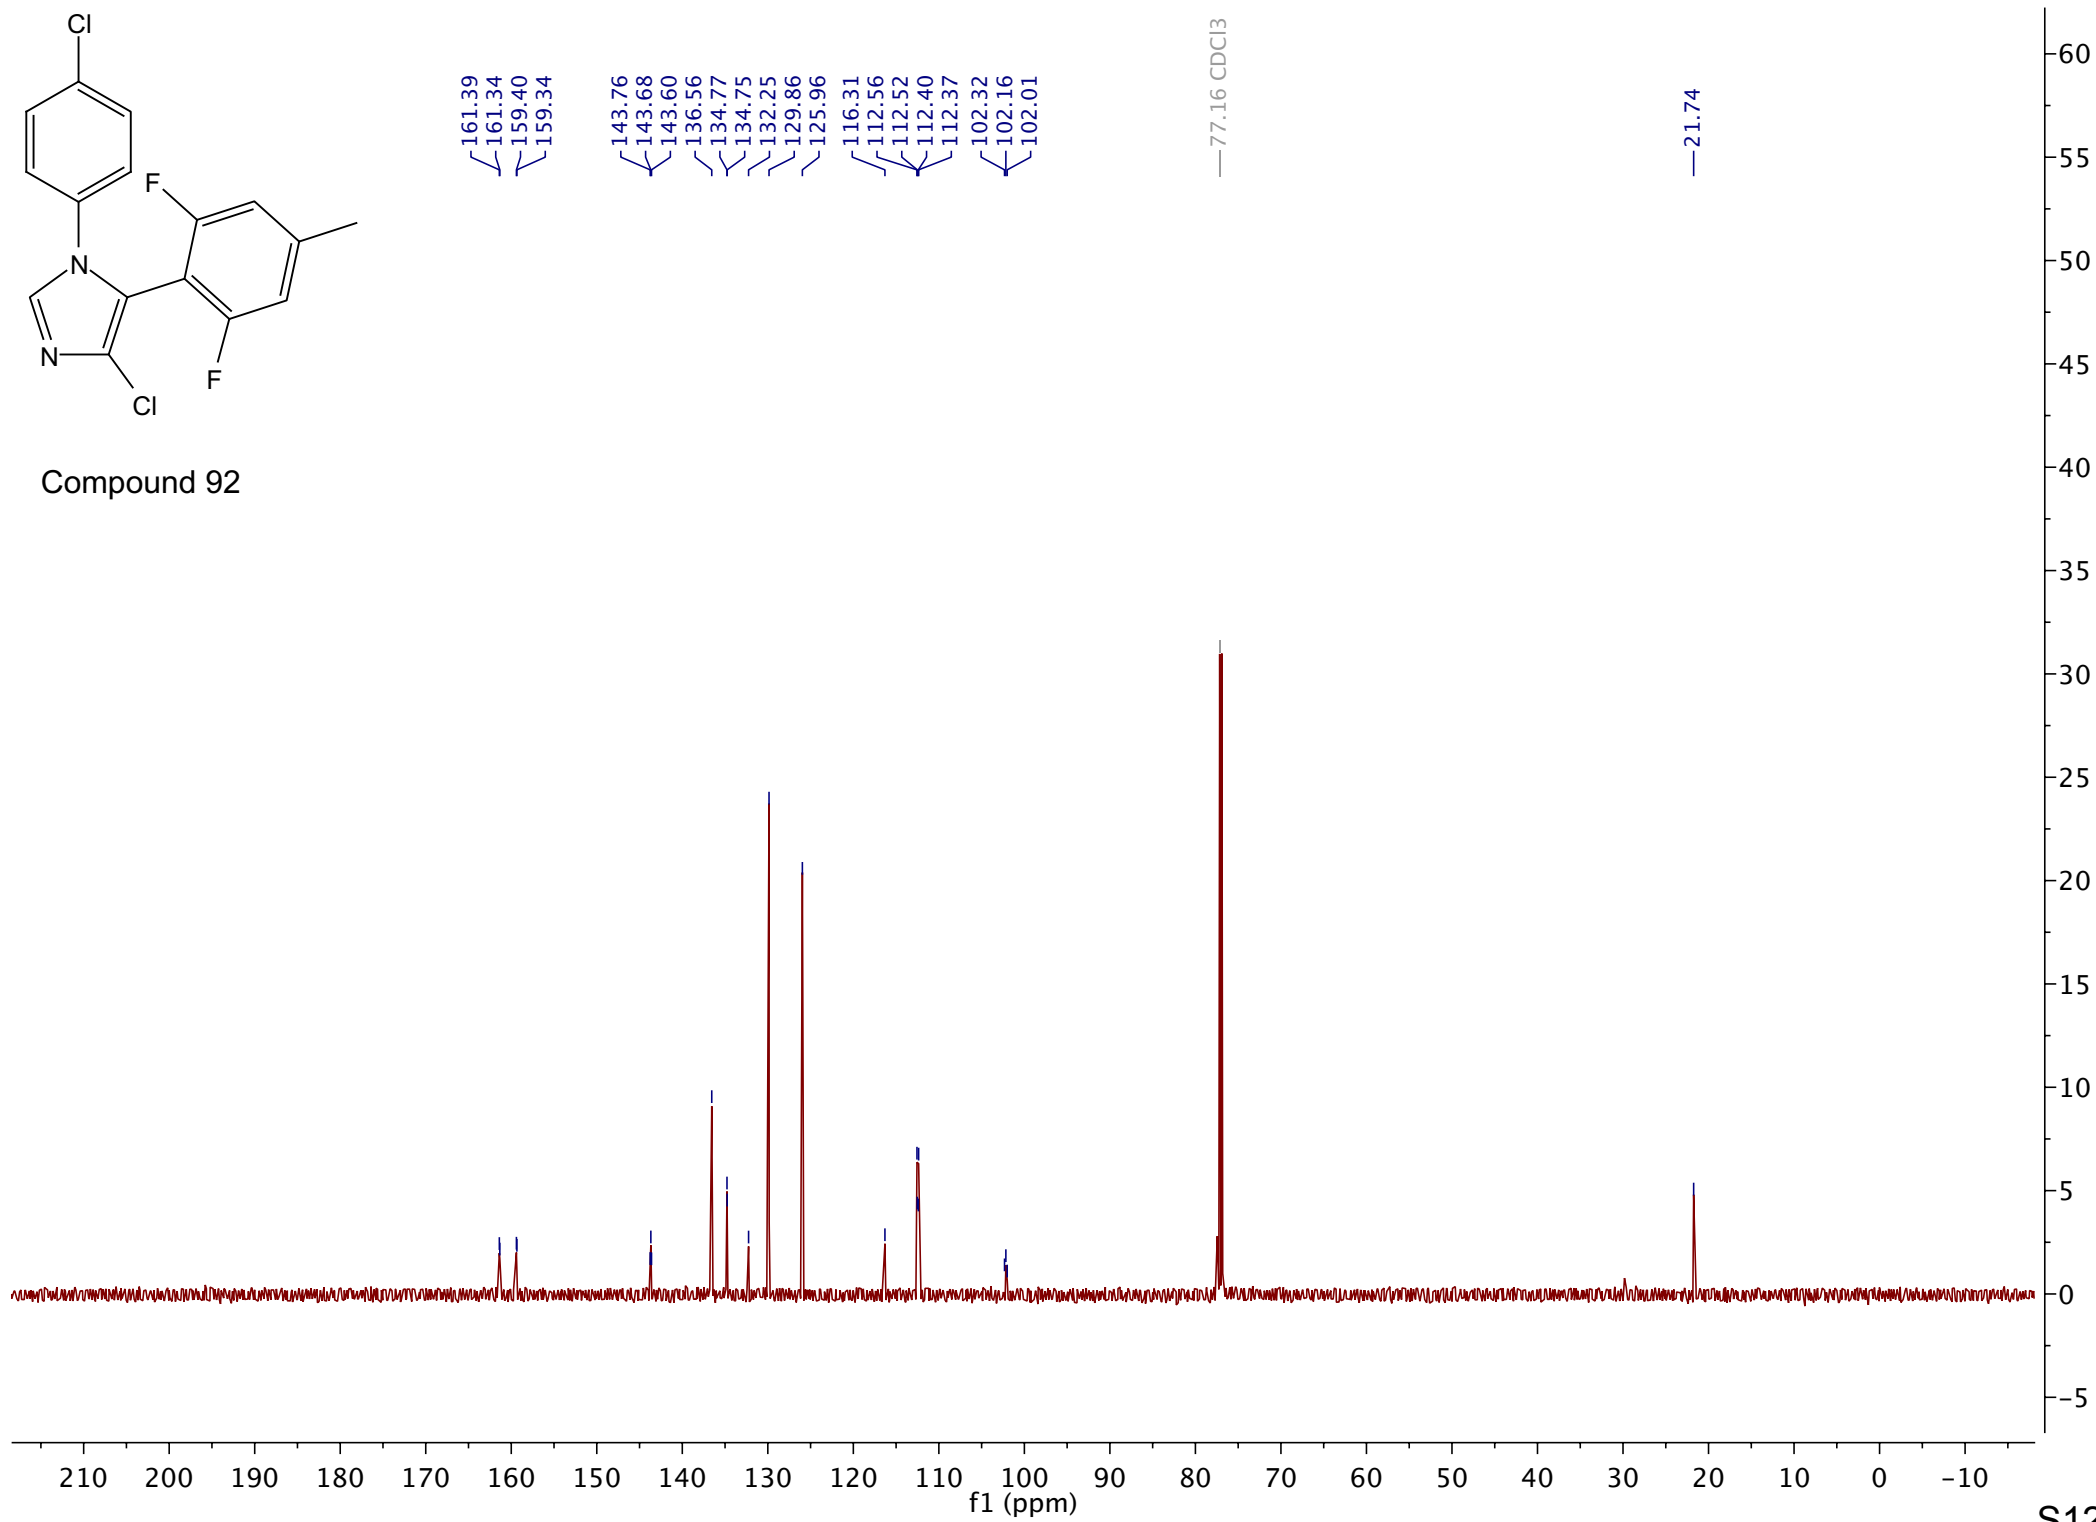

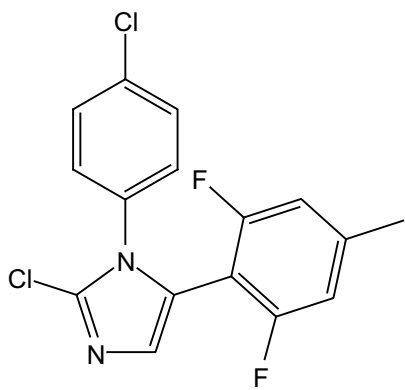

Compound 93

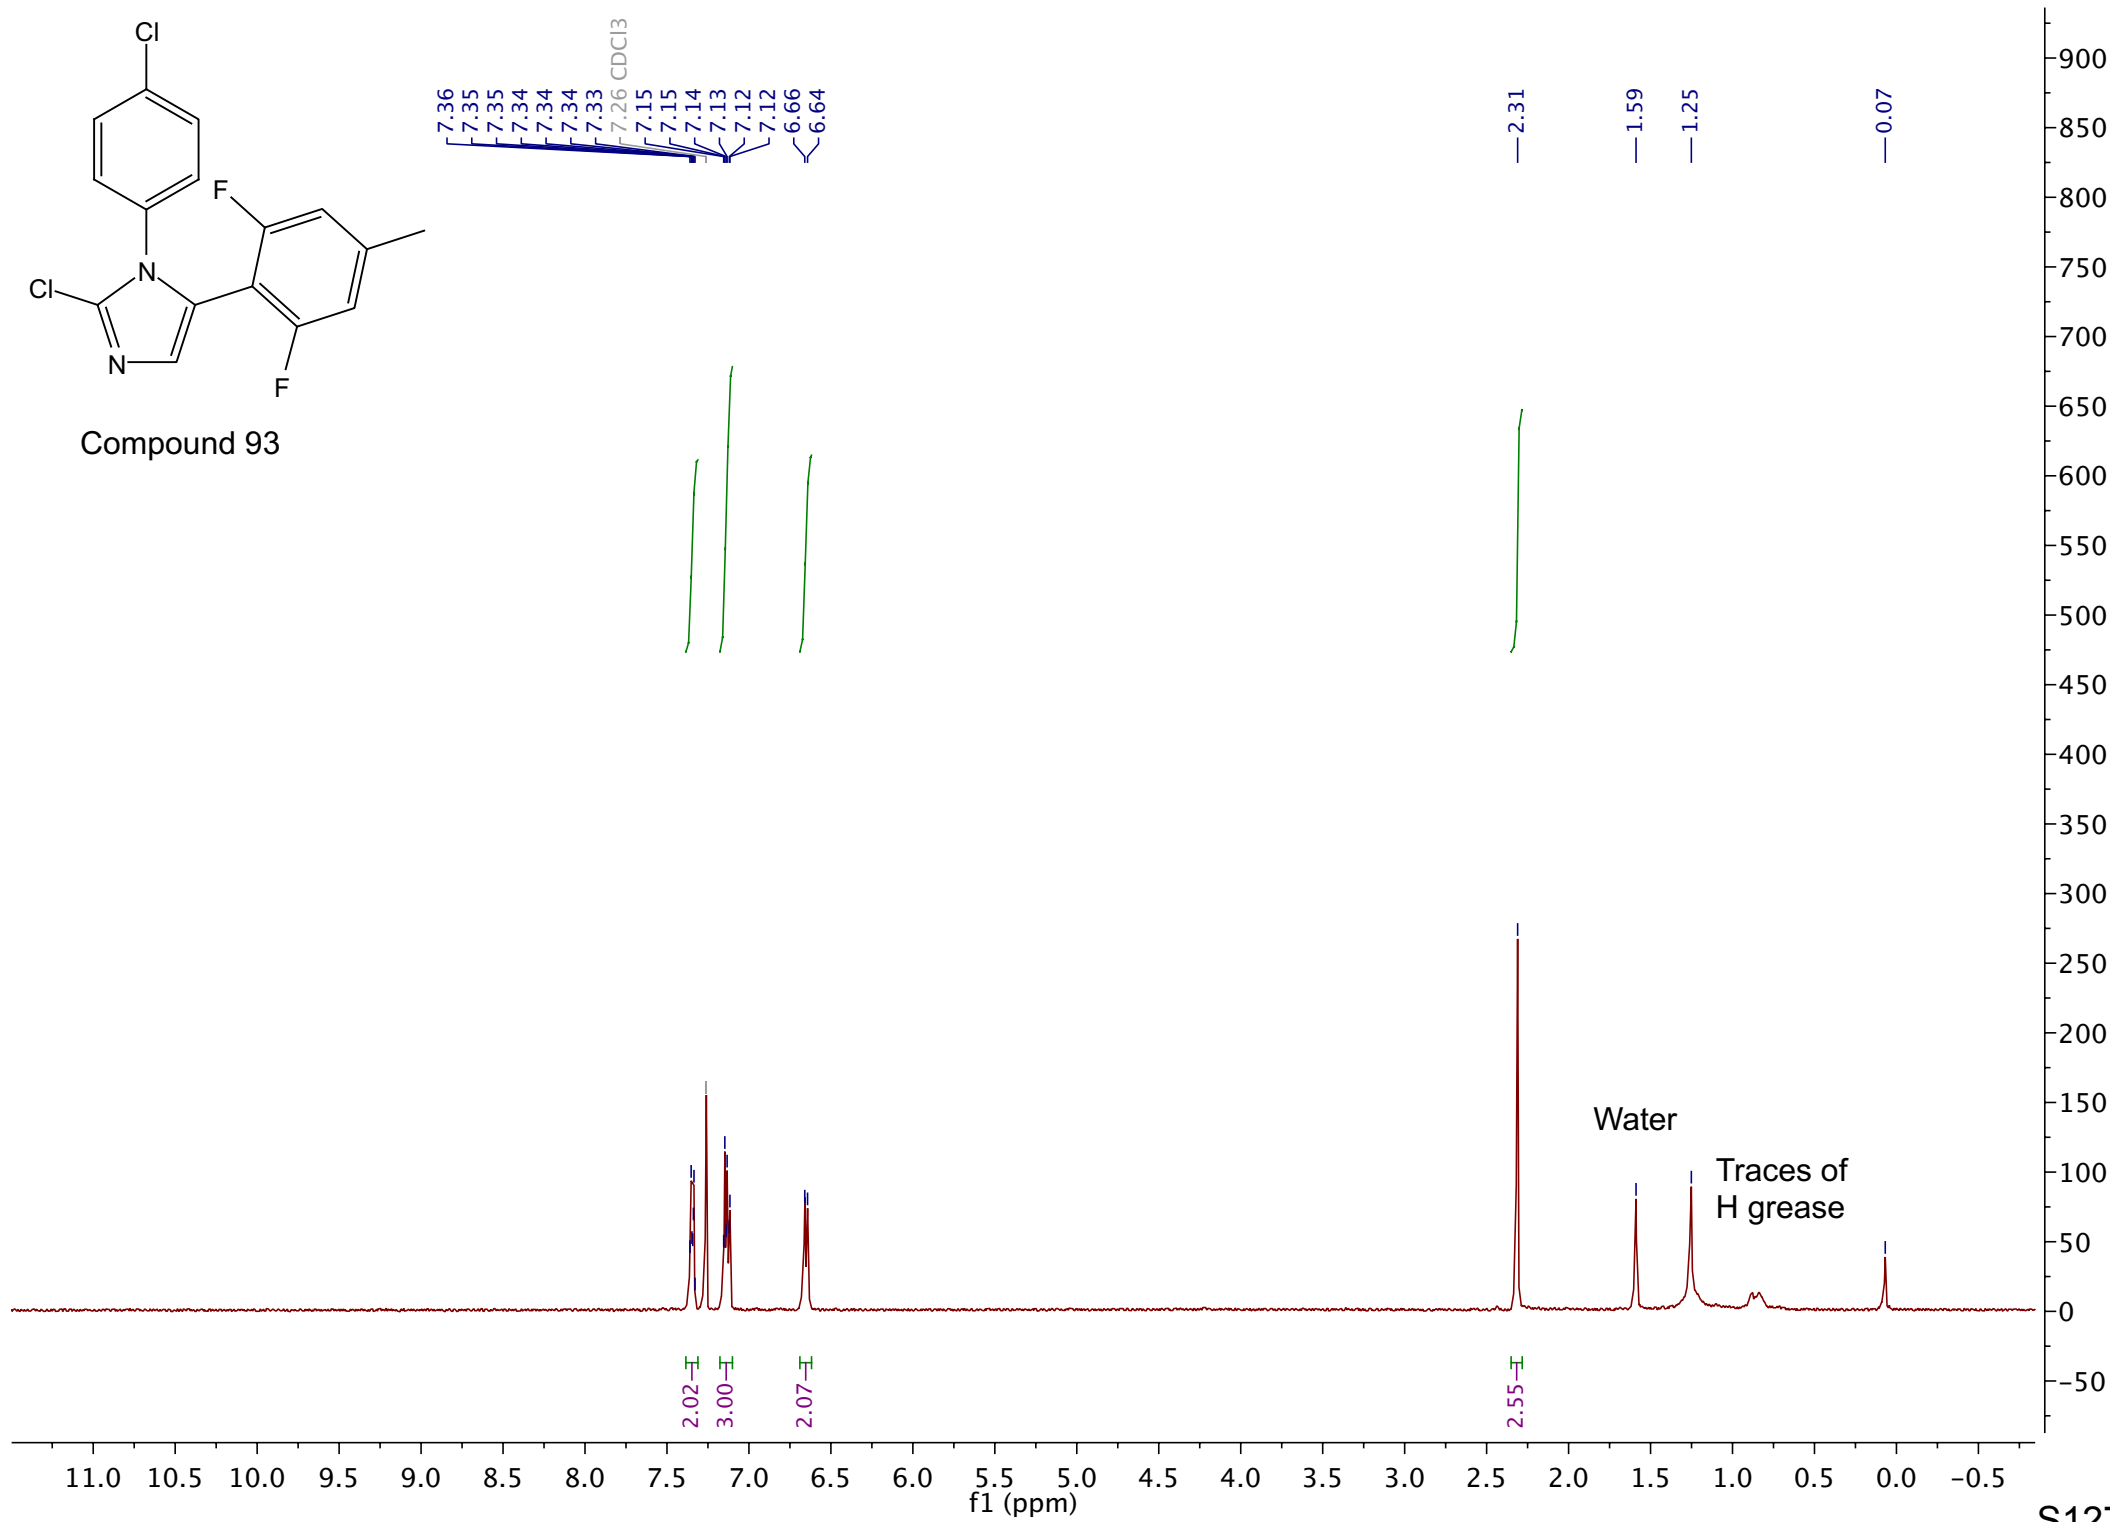

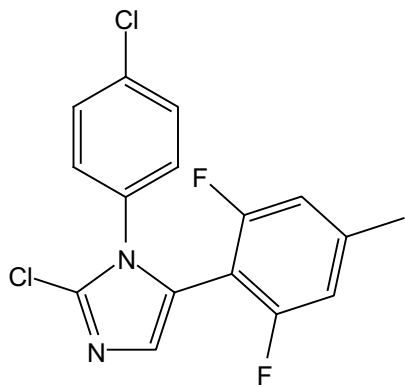

Compound 93

161.15  
161.10  
159.49  
159.45

143.07  
143.00  
142.94

135.27  
134.04  
133.66  
130.31  
129.52  
128.68

122.73

112.33  
112.30  
112.19  
112.16

103.86  
103.72  
103.60

32.08  
29.85

22.85  
21.68

14.30

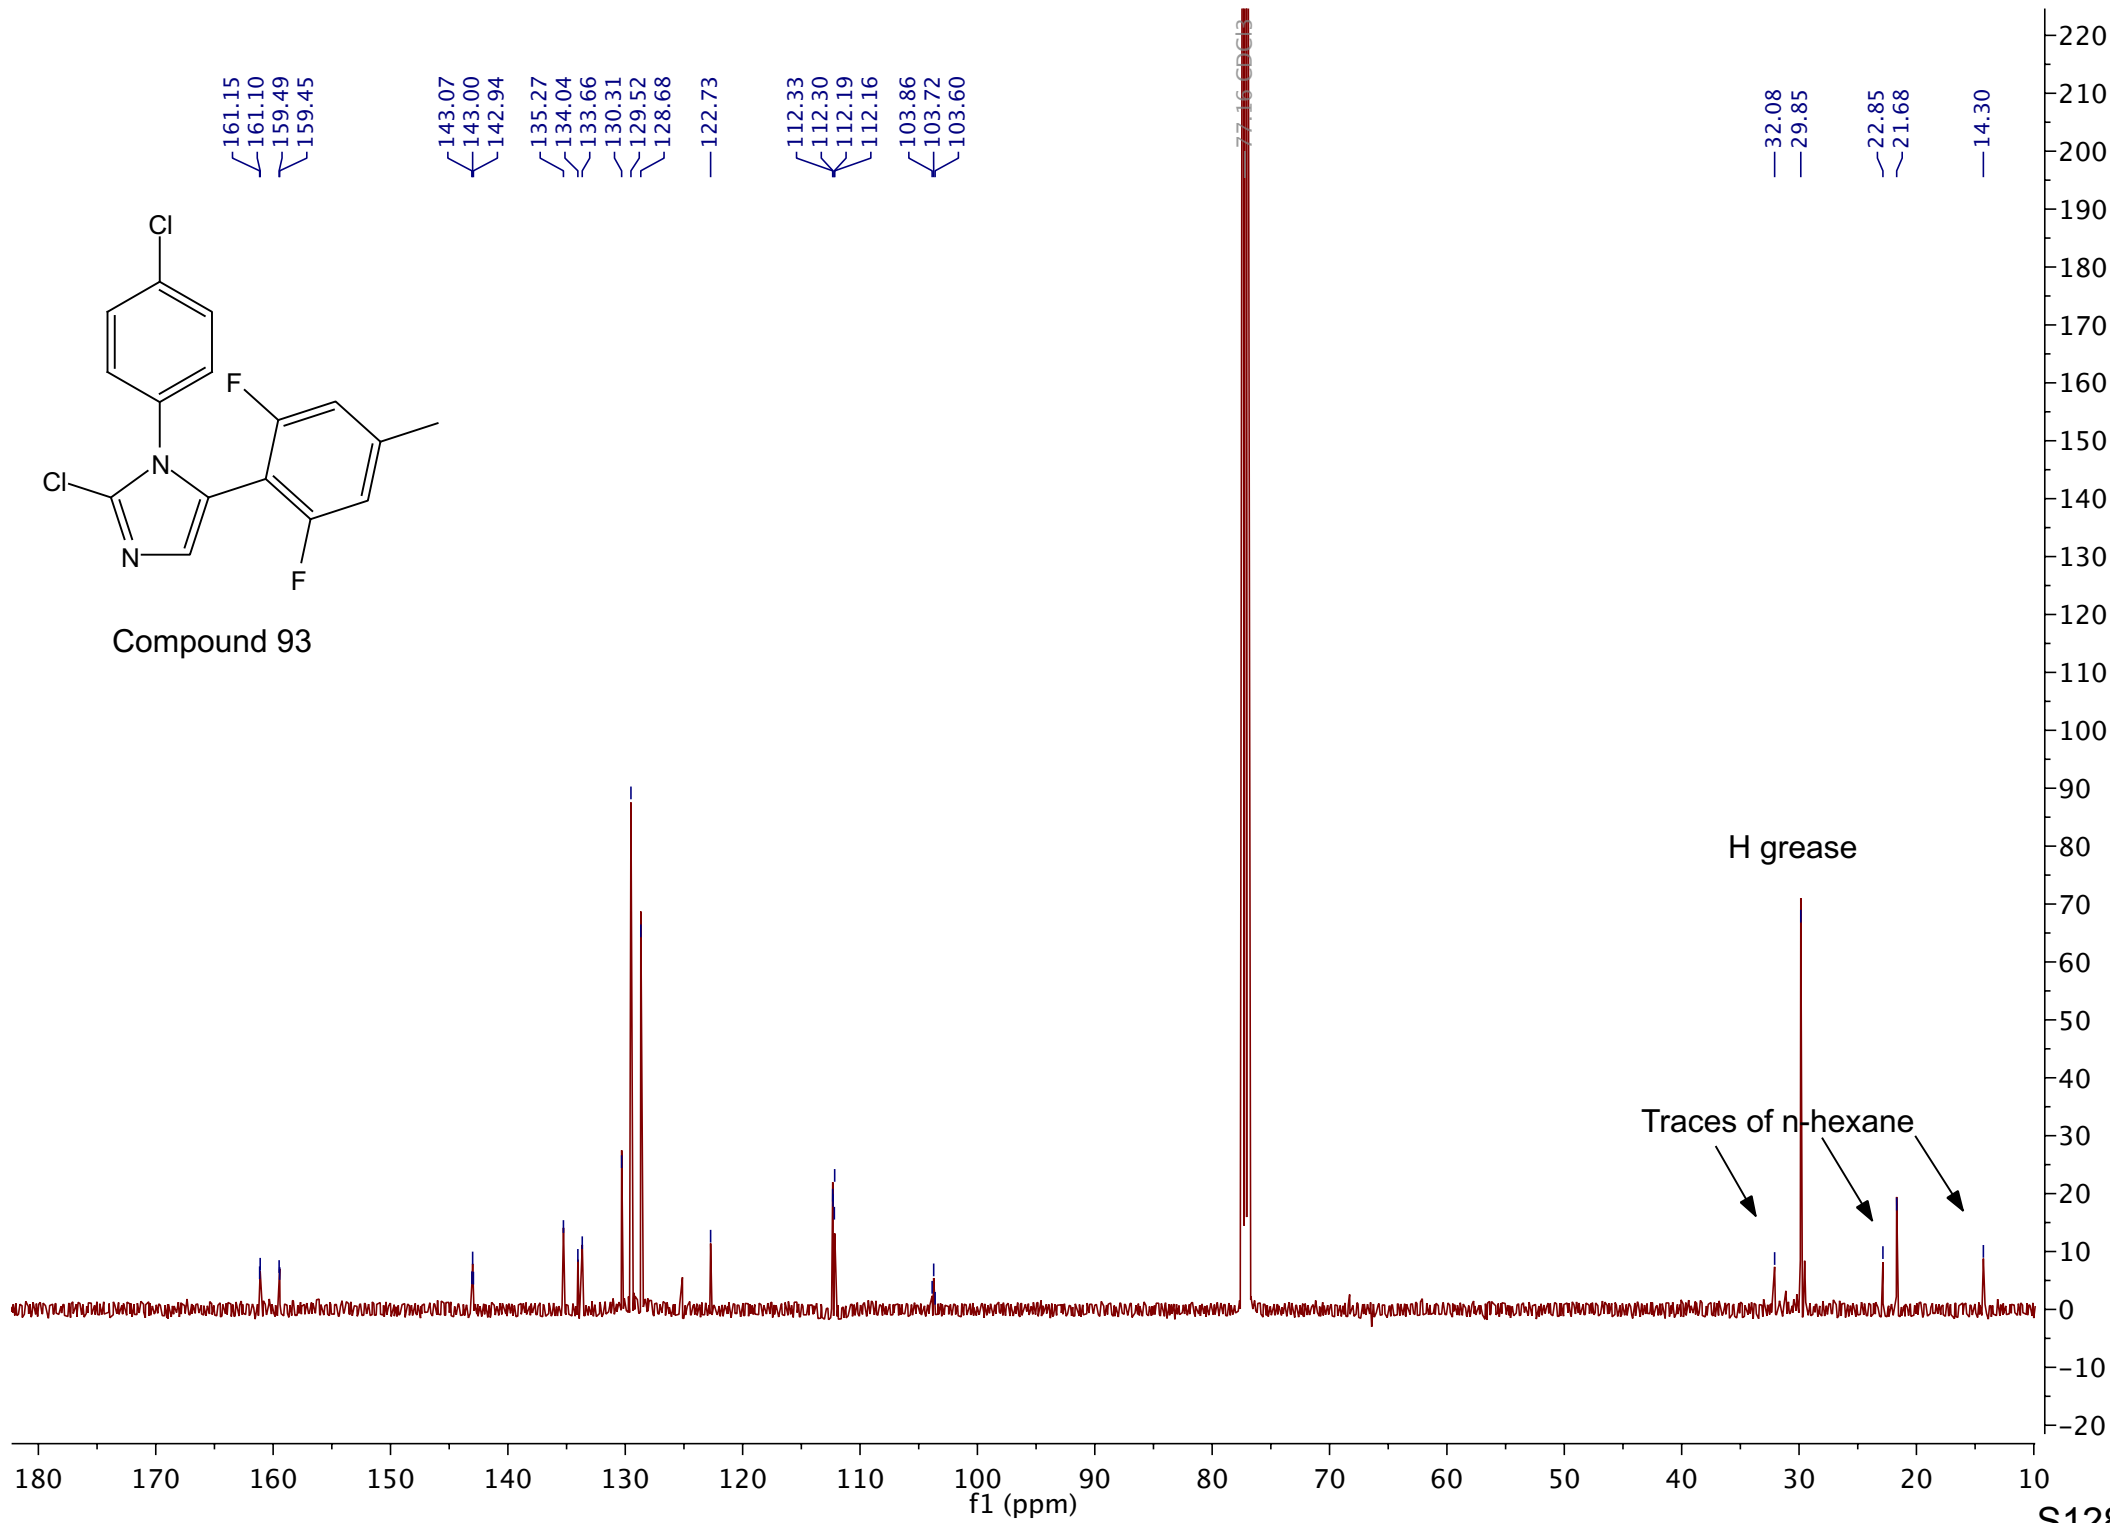



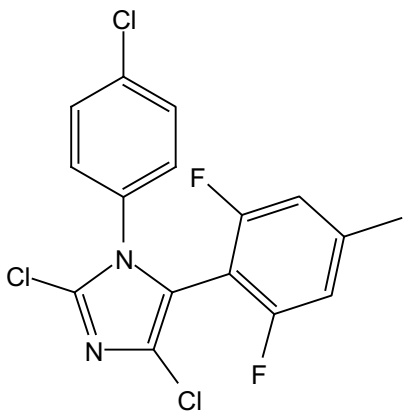

Compound 94

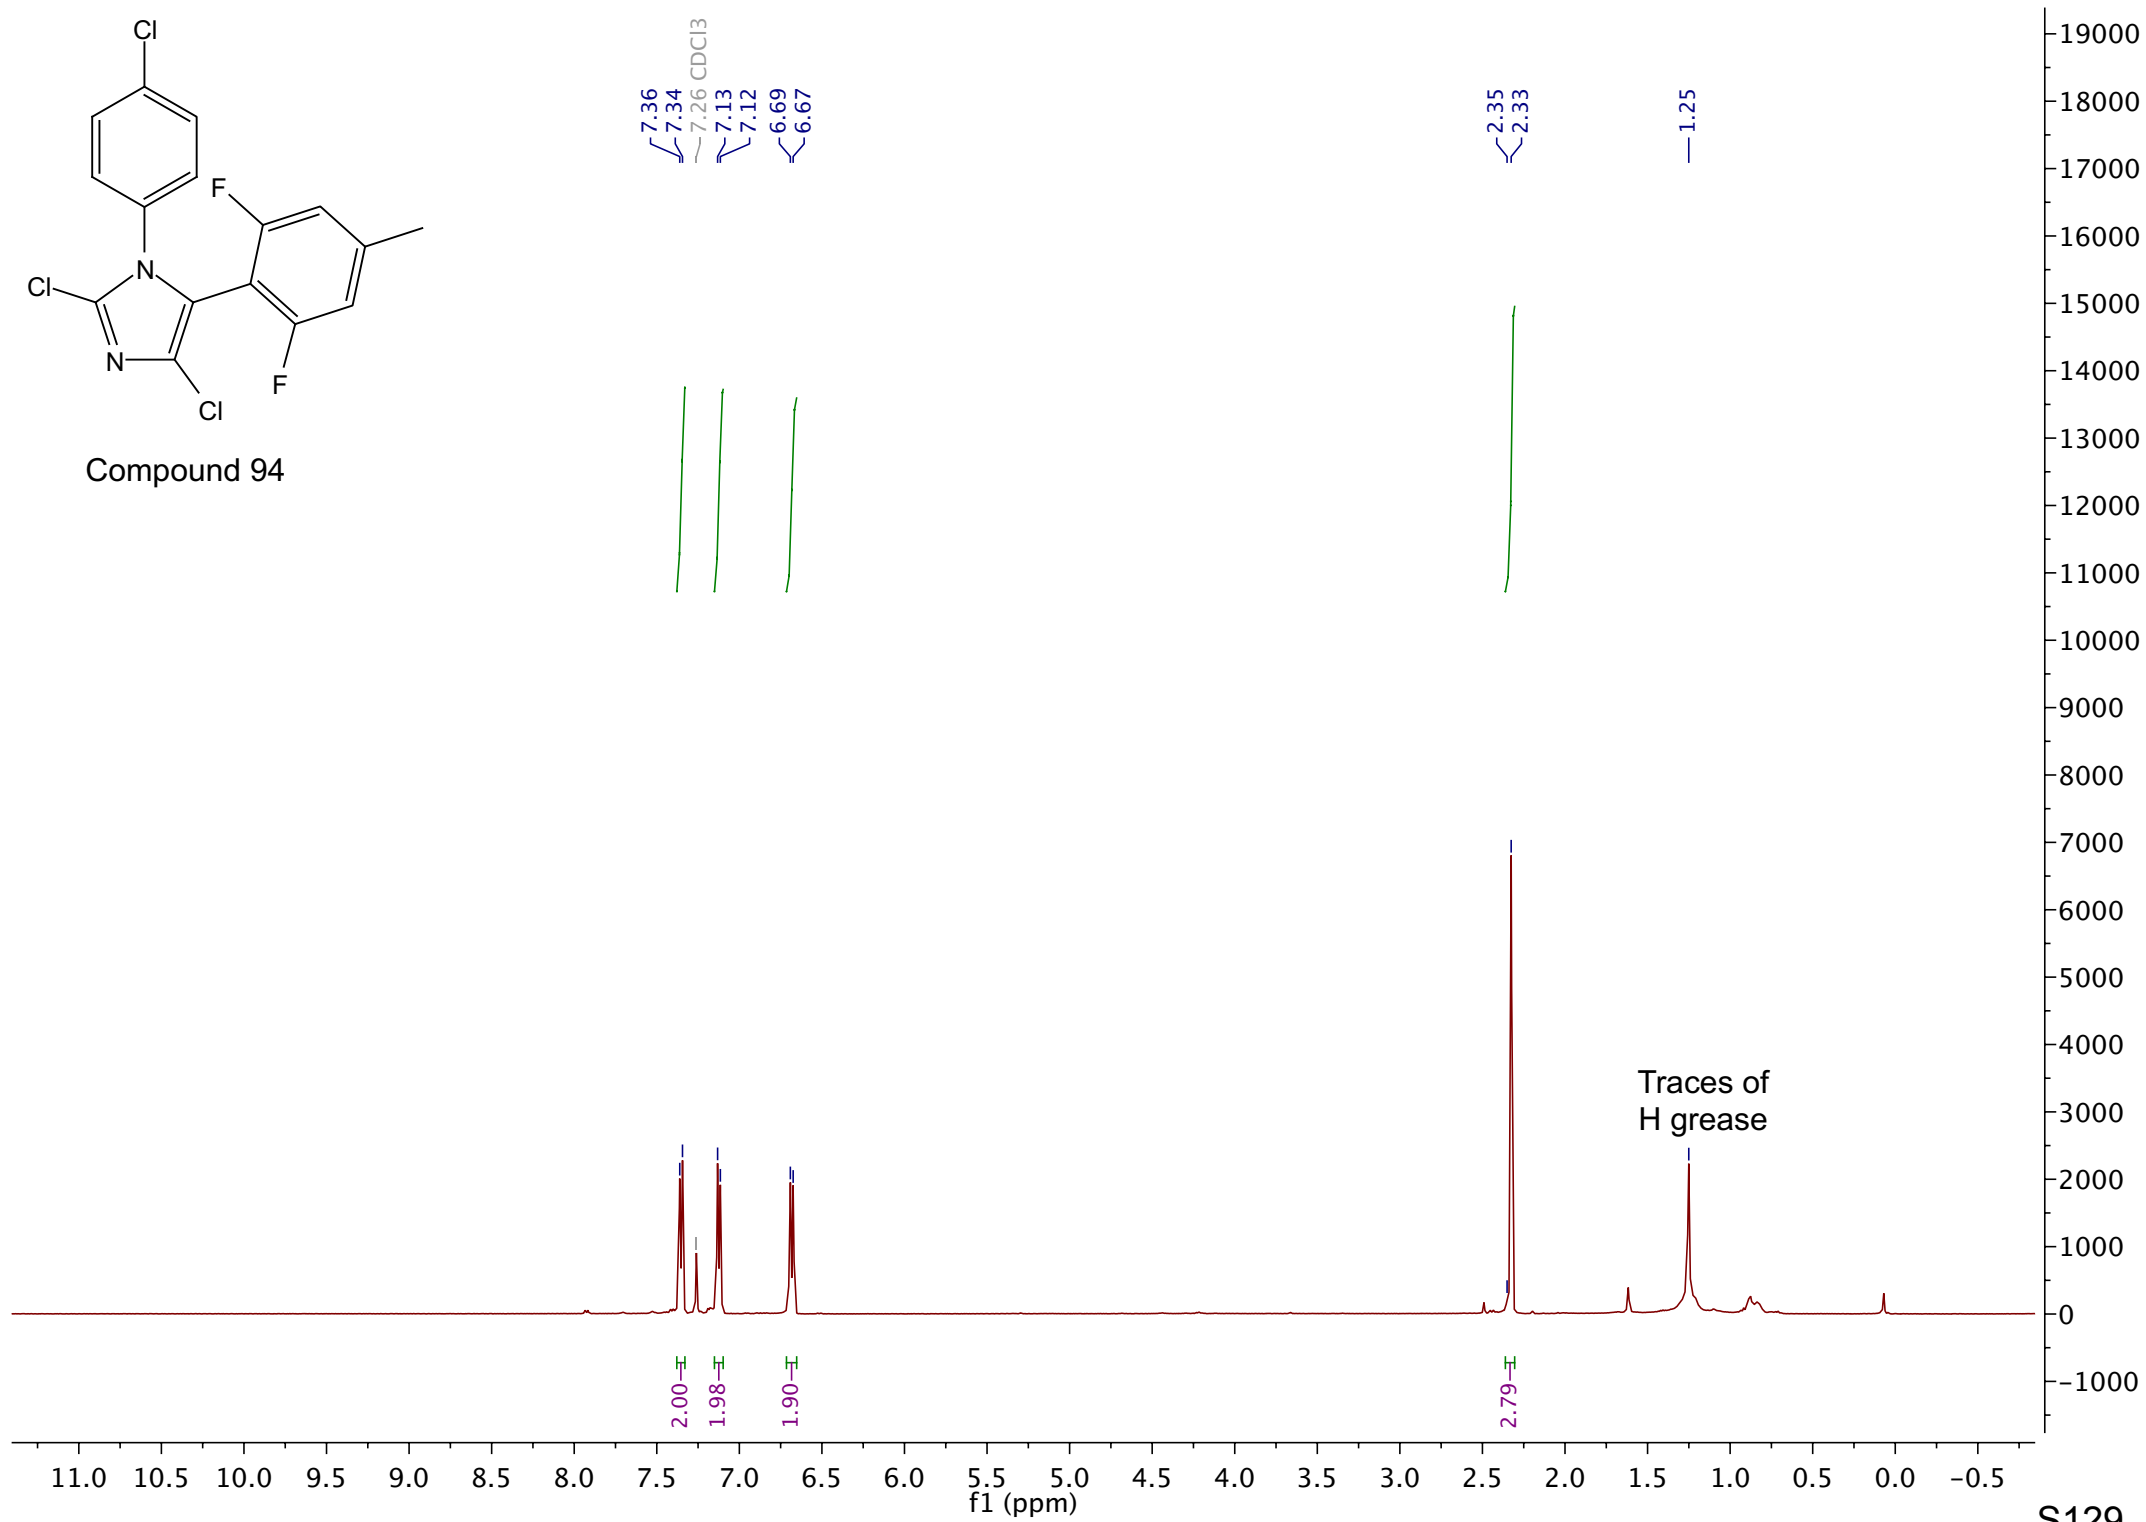

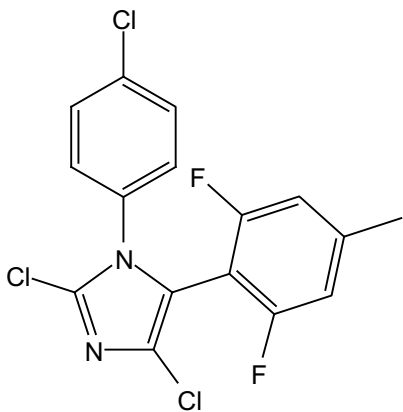

Compound 94

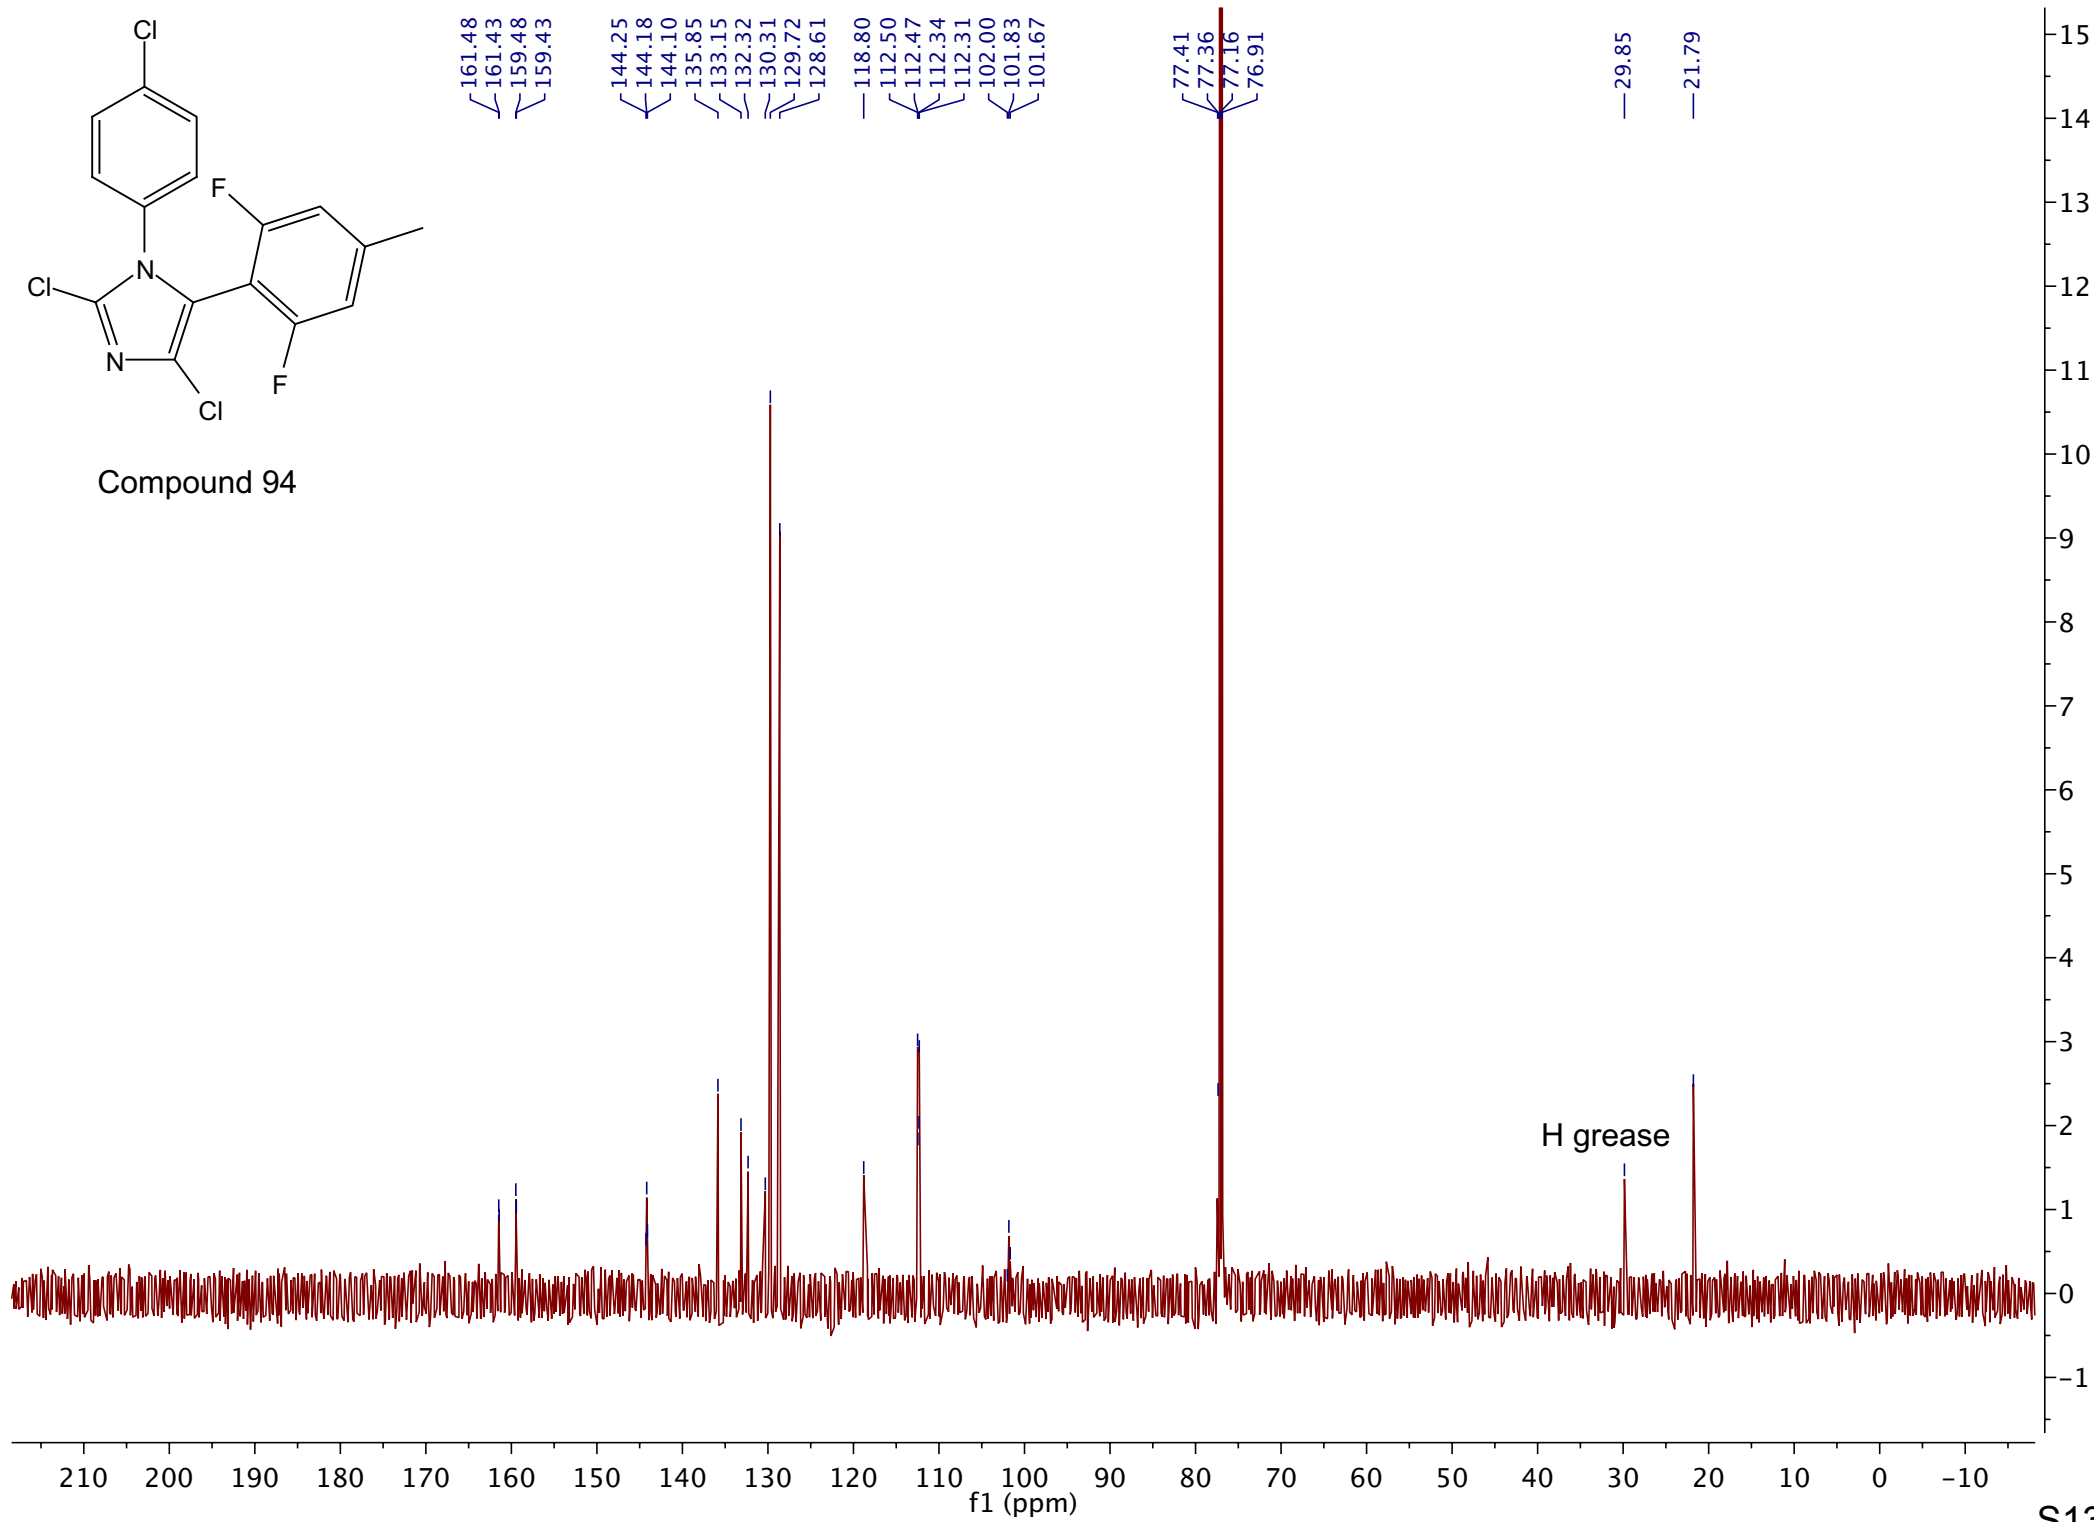

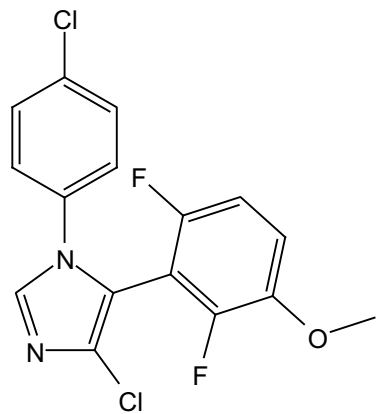

Compound 95

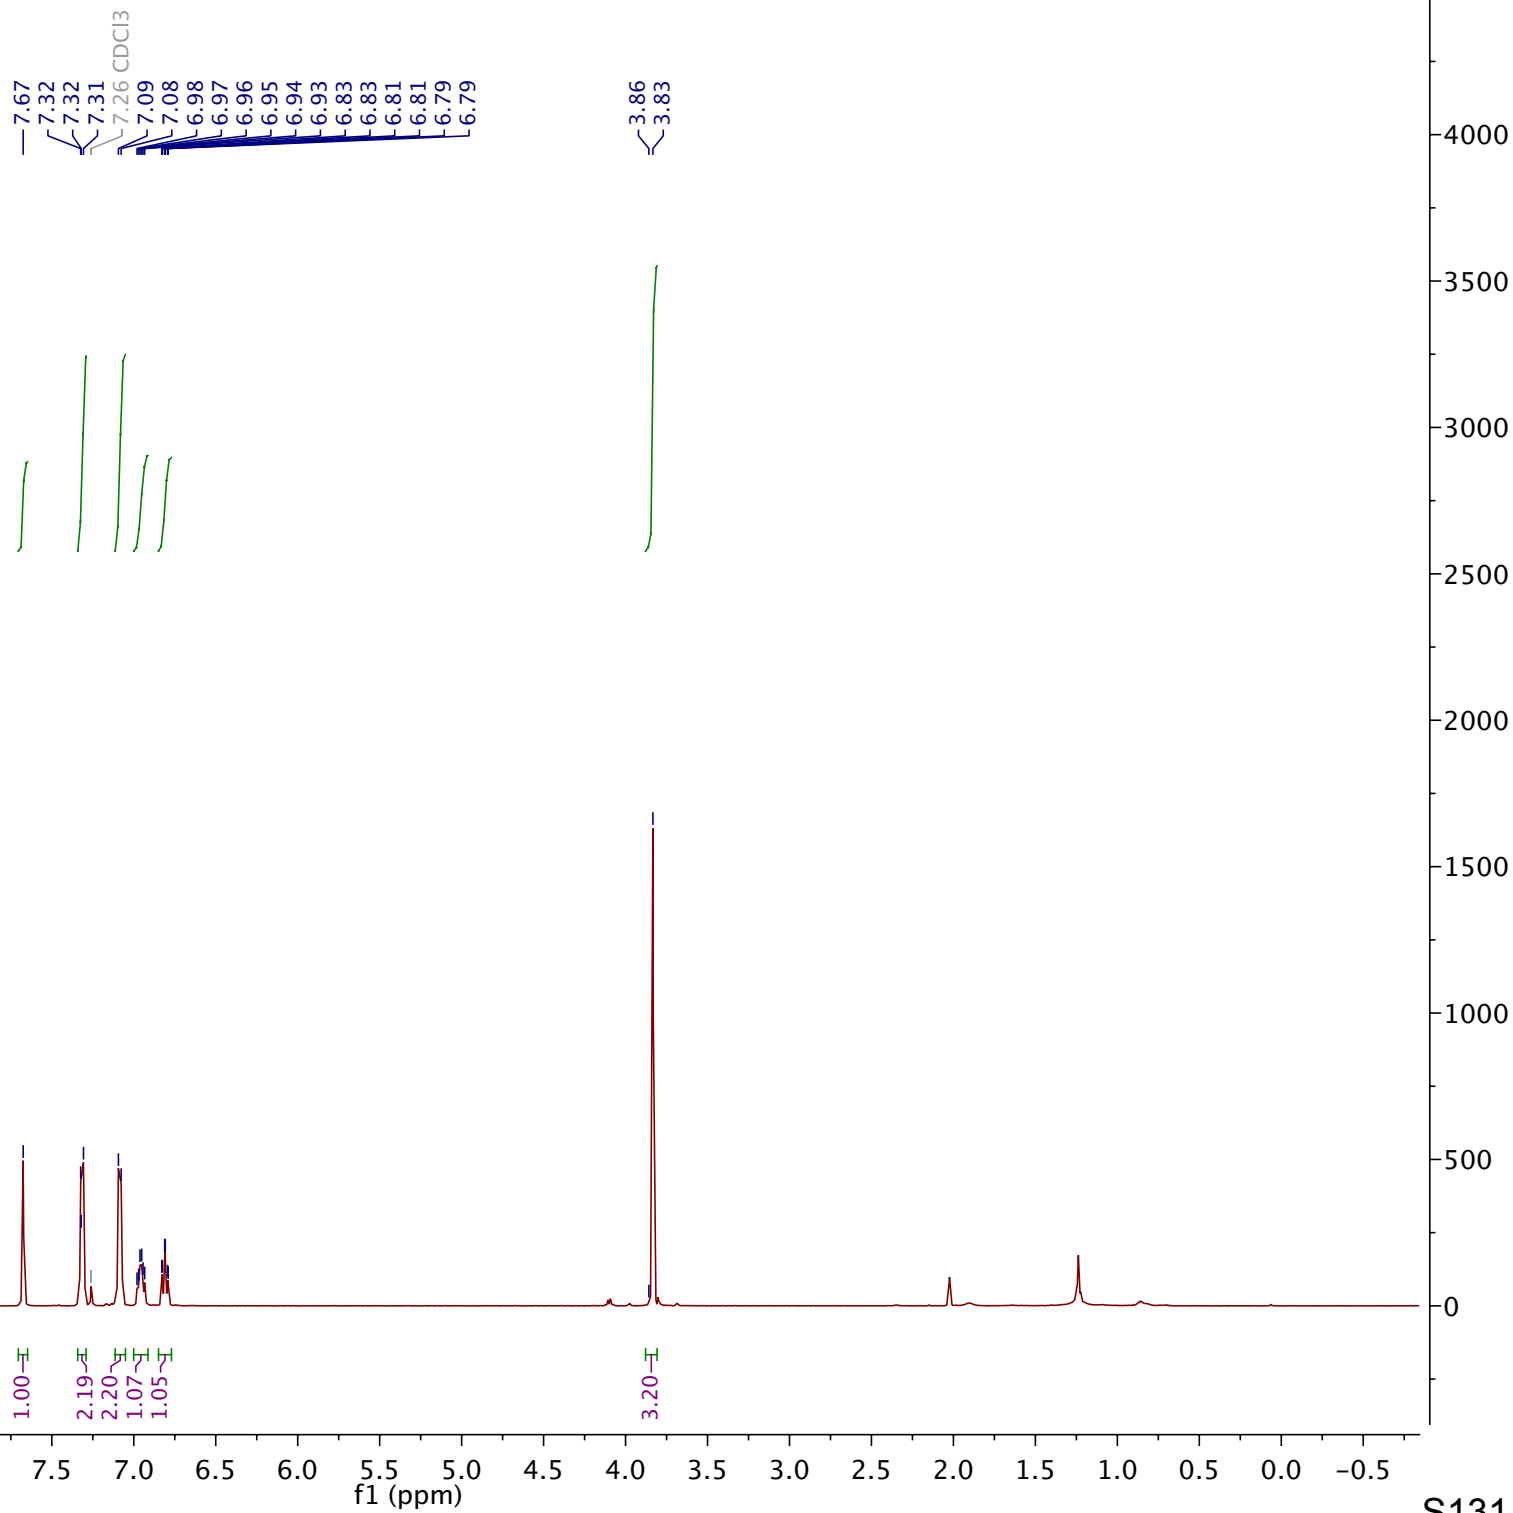

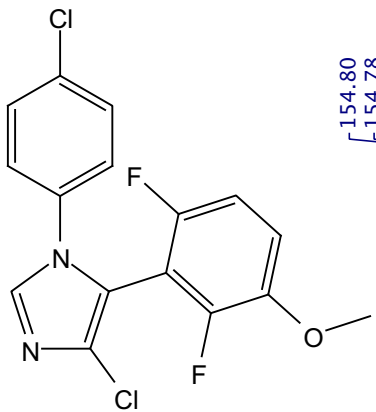

Compound 95

154.80  
154.78  
152.86  
152.83  
150.95  
150.90  
148.95  
148.90  
144.55  
144.53  
144.46  
144.44  
136.77  
134.84  
134.59  
132.37  
129.88  
125.92  
116.10  
115.01  
114.98  
114.92  
114.91  
110.63  
110.60  
110.45  
110.42  
106.28  
106.15  
106.12  
105.98

—77.16 CDCl<sub>3</sub>

—56.81

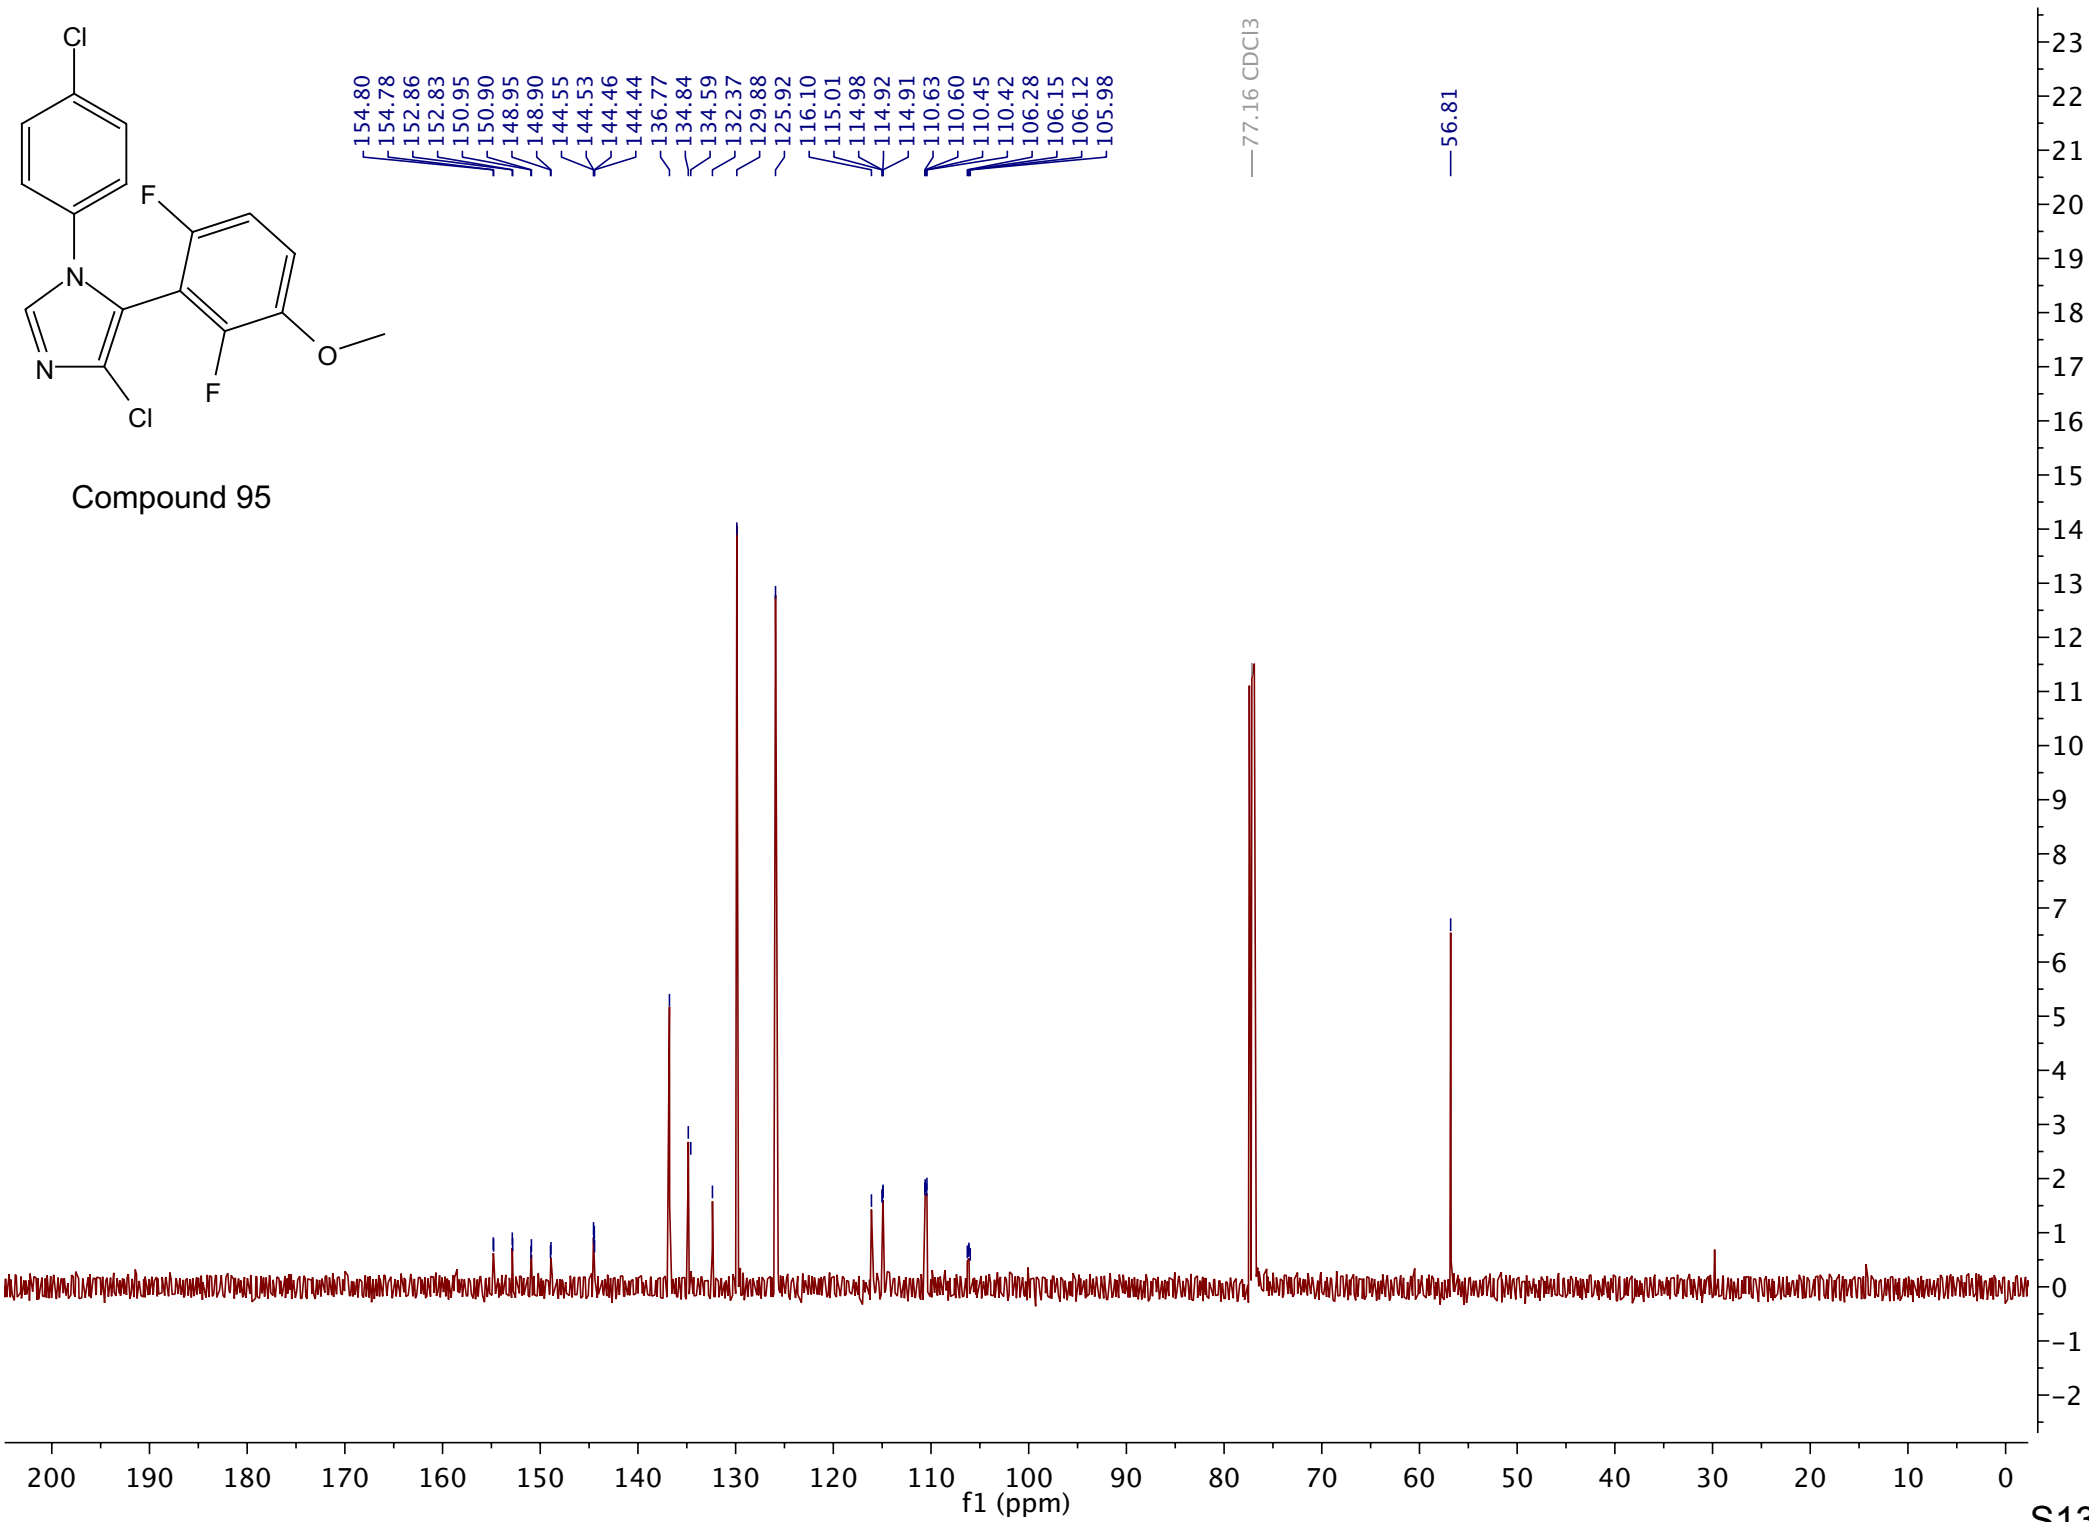

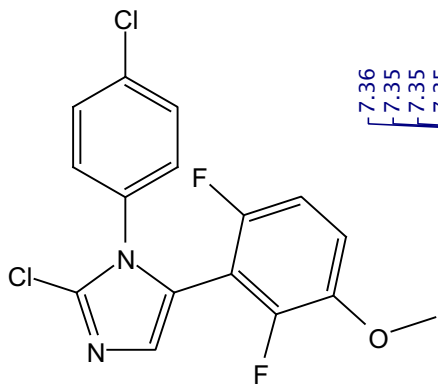

Compound 96

7.36  
7.35  
7.35  
7.35  
7.34  
7.34  
7.33  
7.33  
7.26 CDCl<sub>3</sub>  
7.18  
7.14  
7.13  
7.13  
6.91  
6.90  
6.89  
6.88  
6.87  
6.86  
6.78  
6.77  
6.77  
6.76  
6.75  
6.74  
6.74

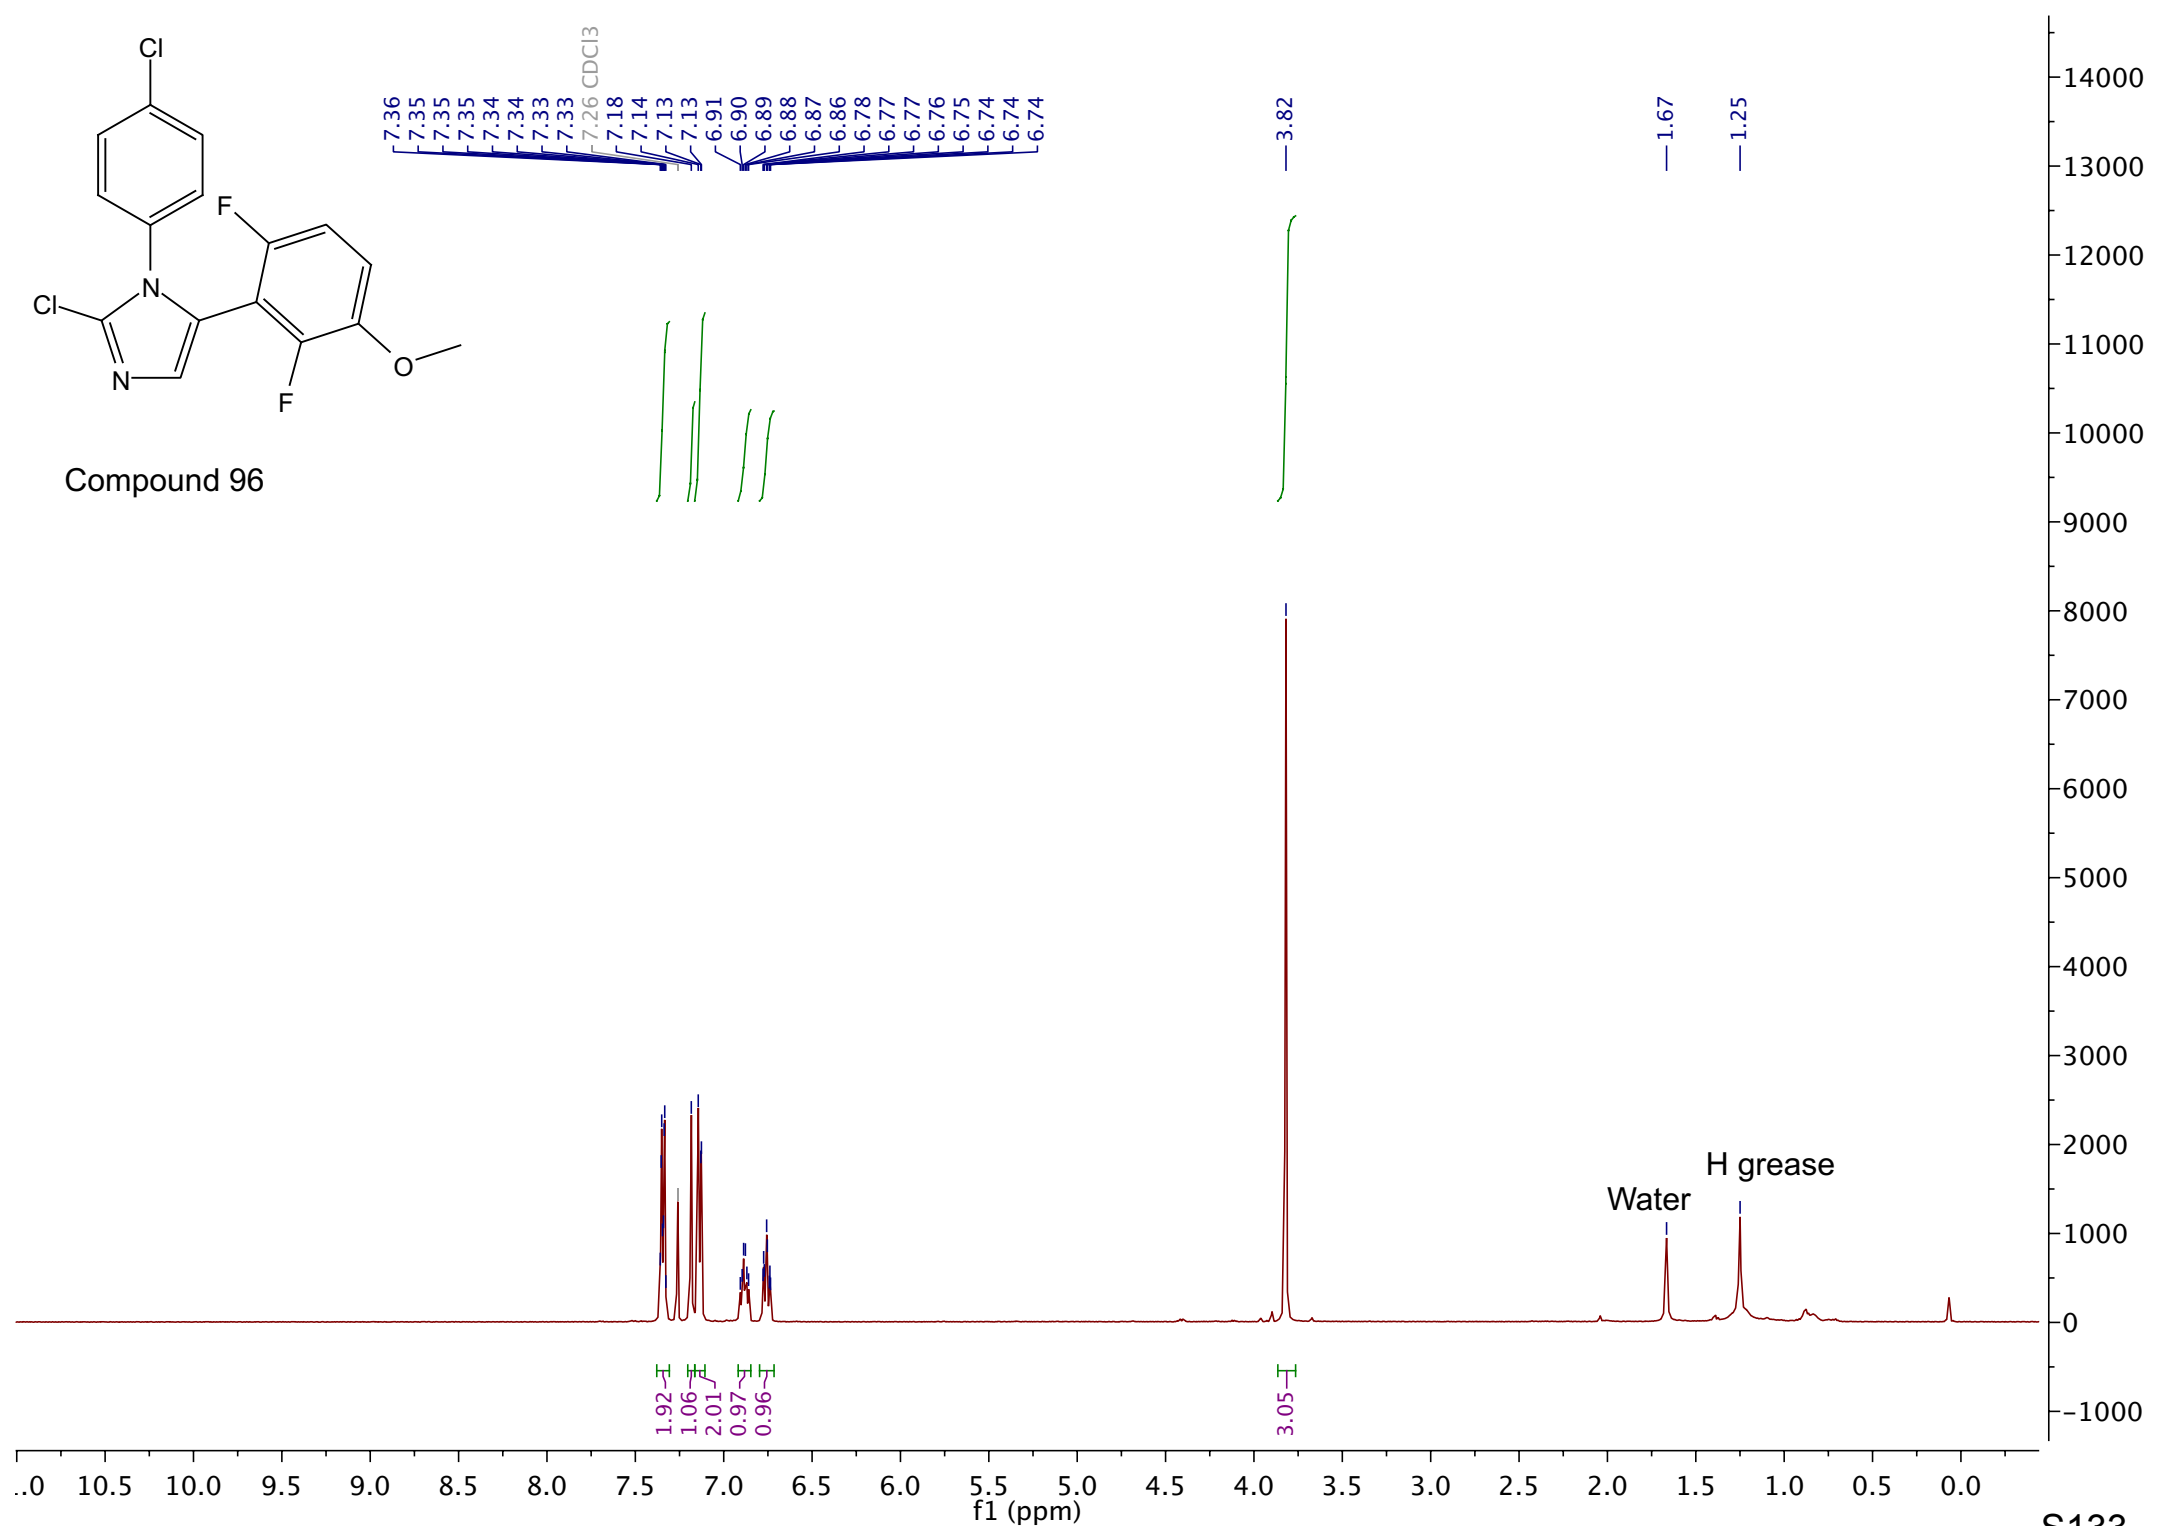

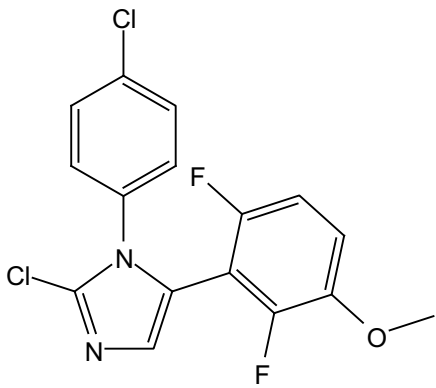

Compound 96

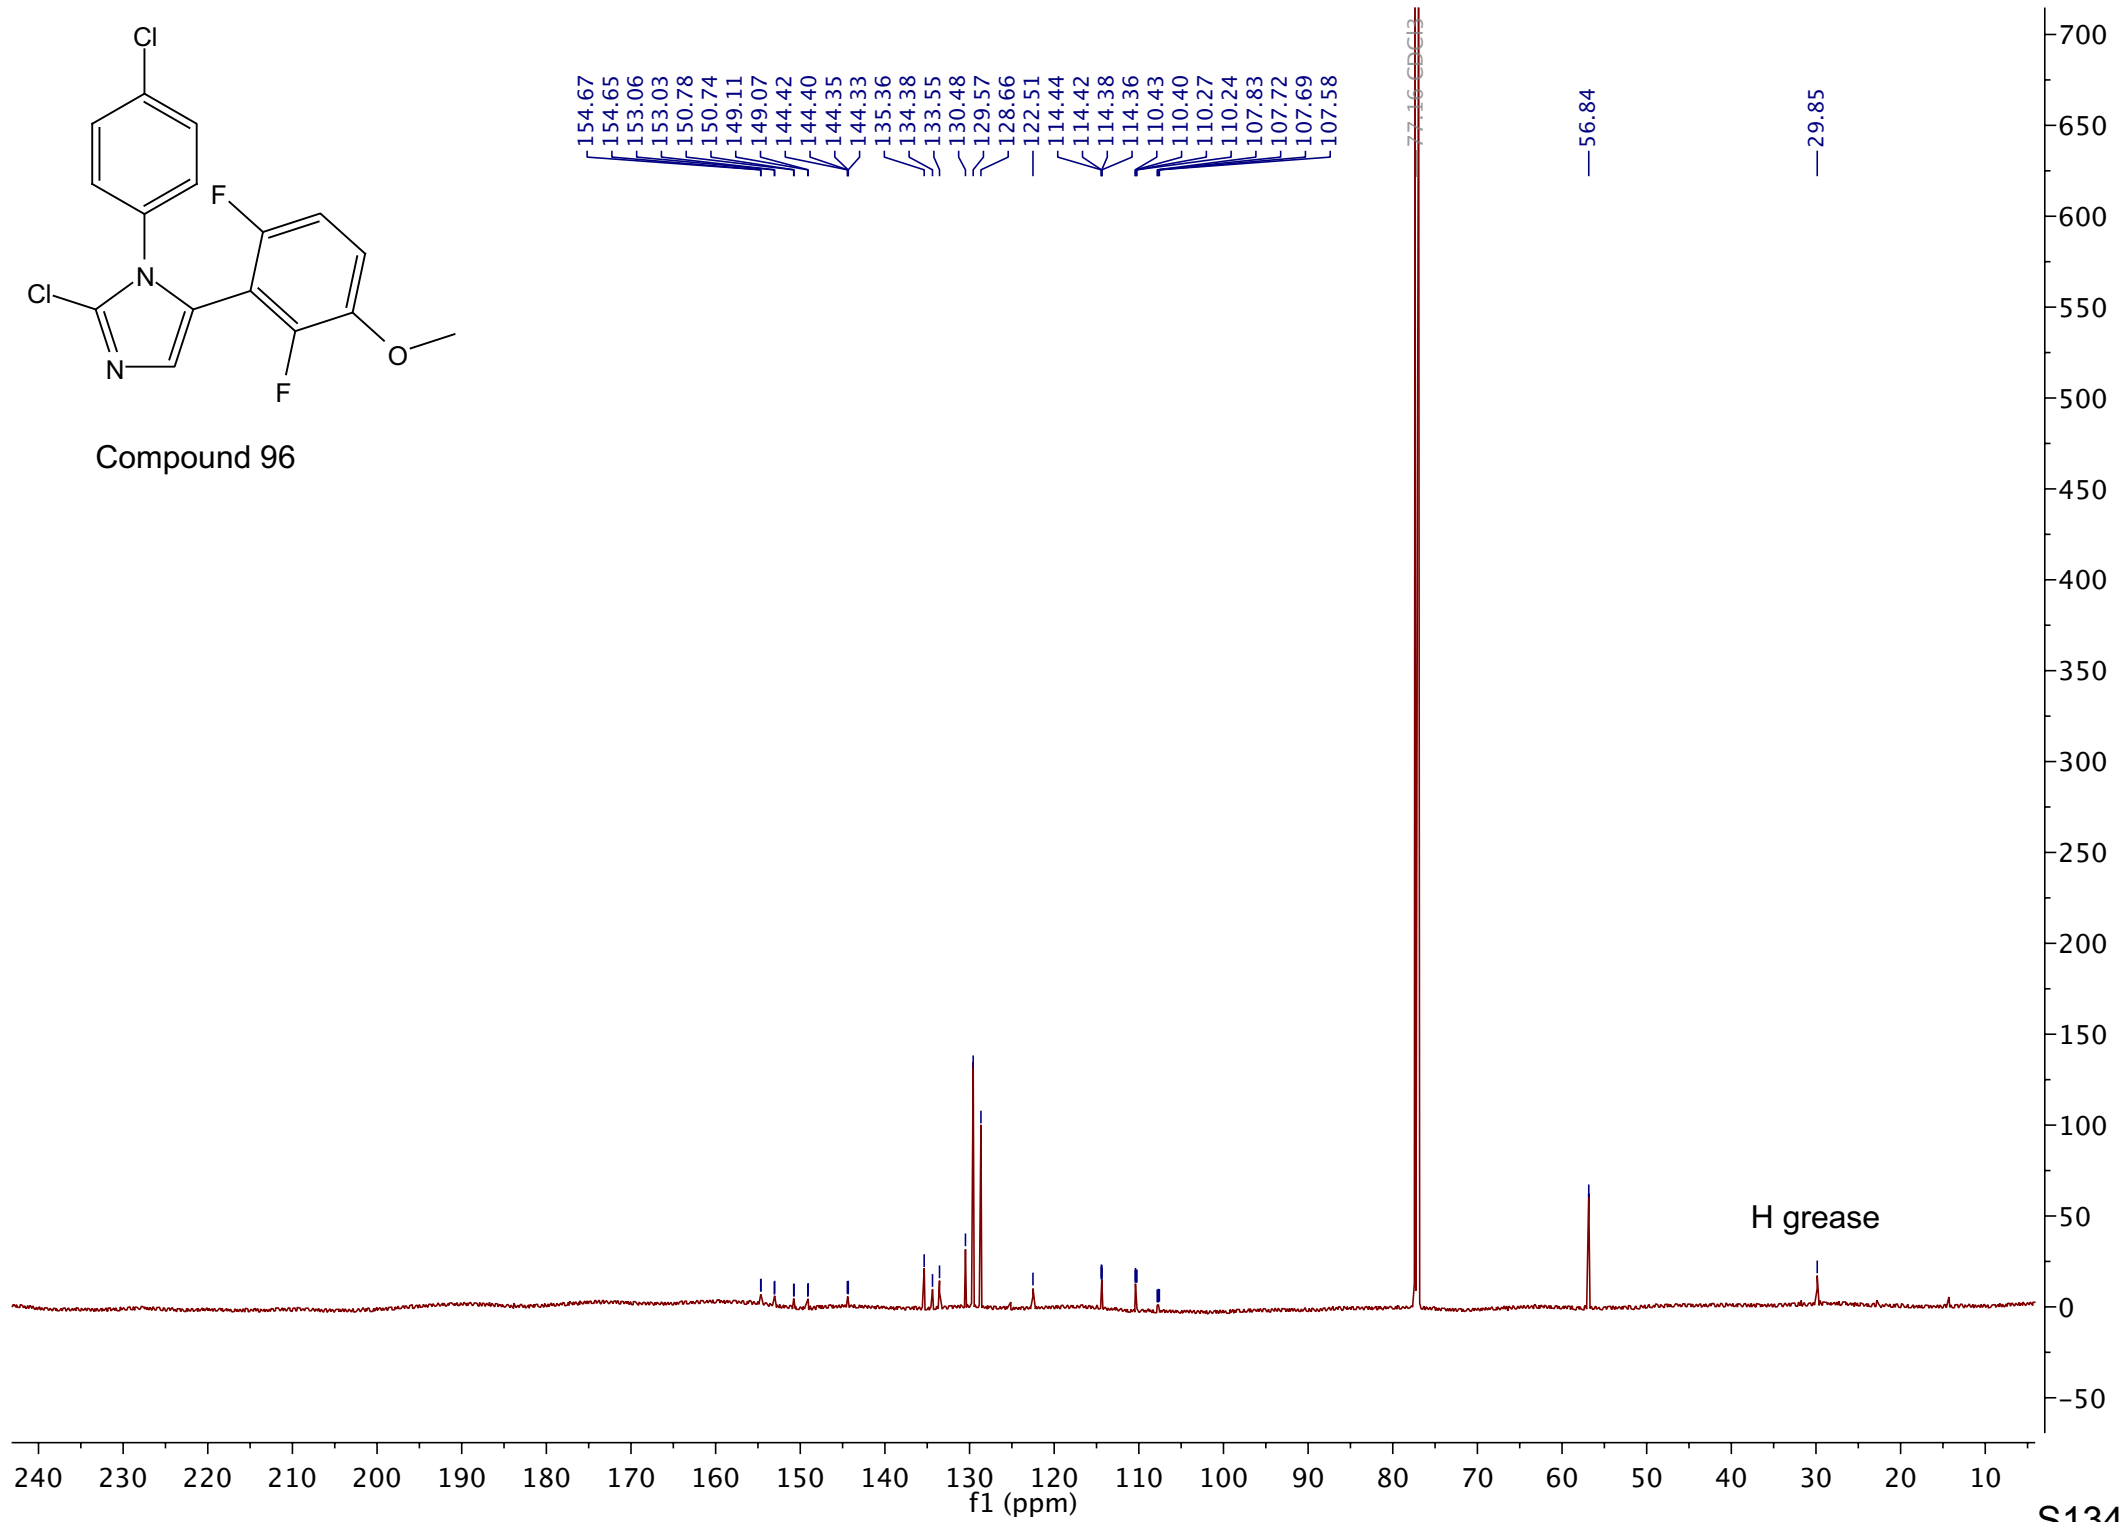

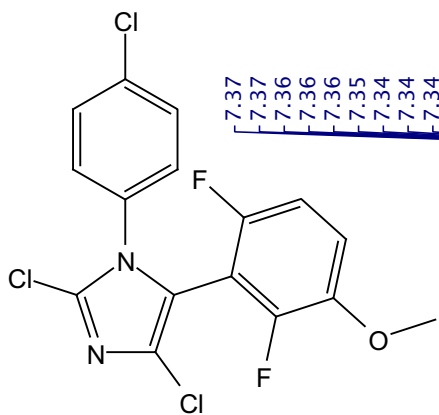

Compound 97

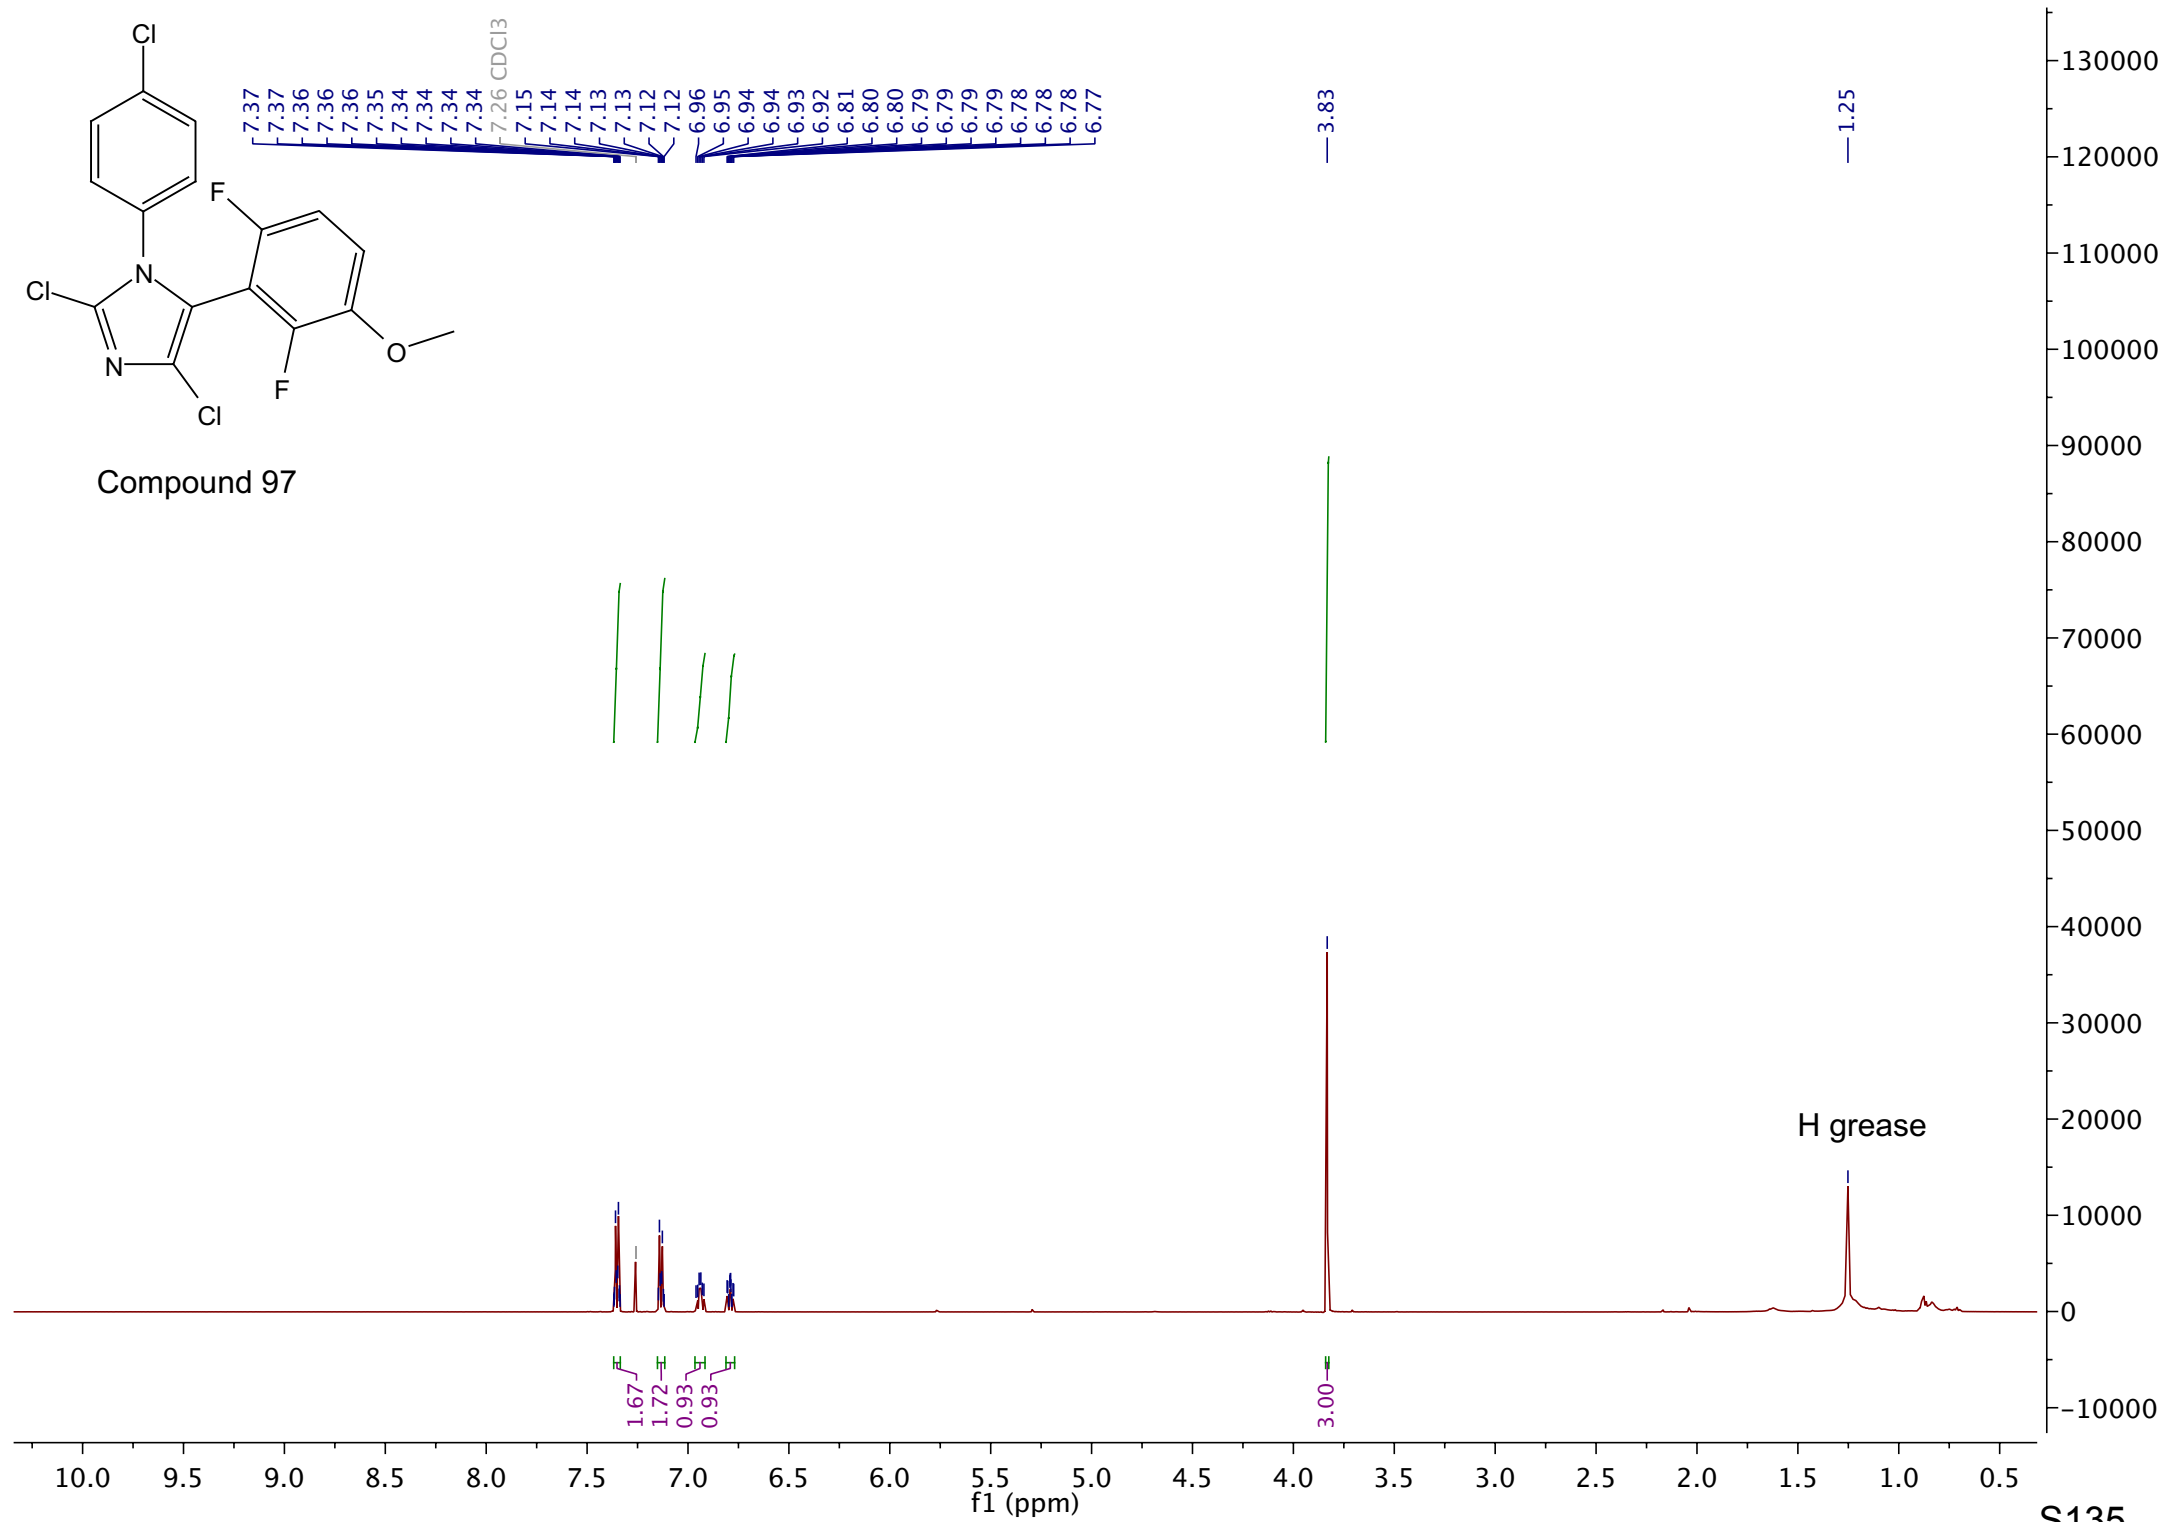

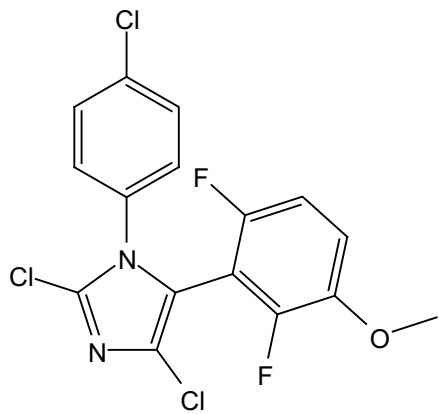

Compound 97

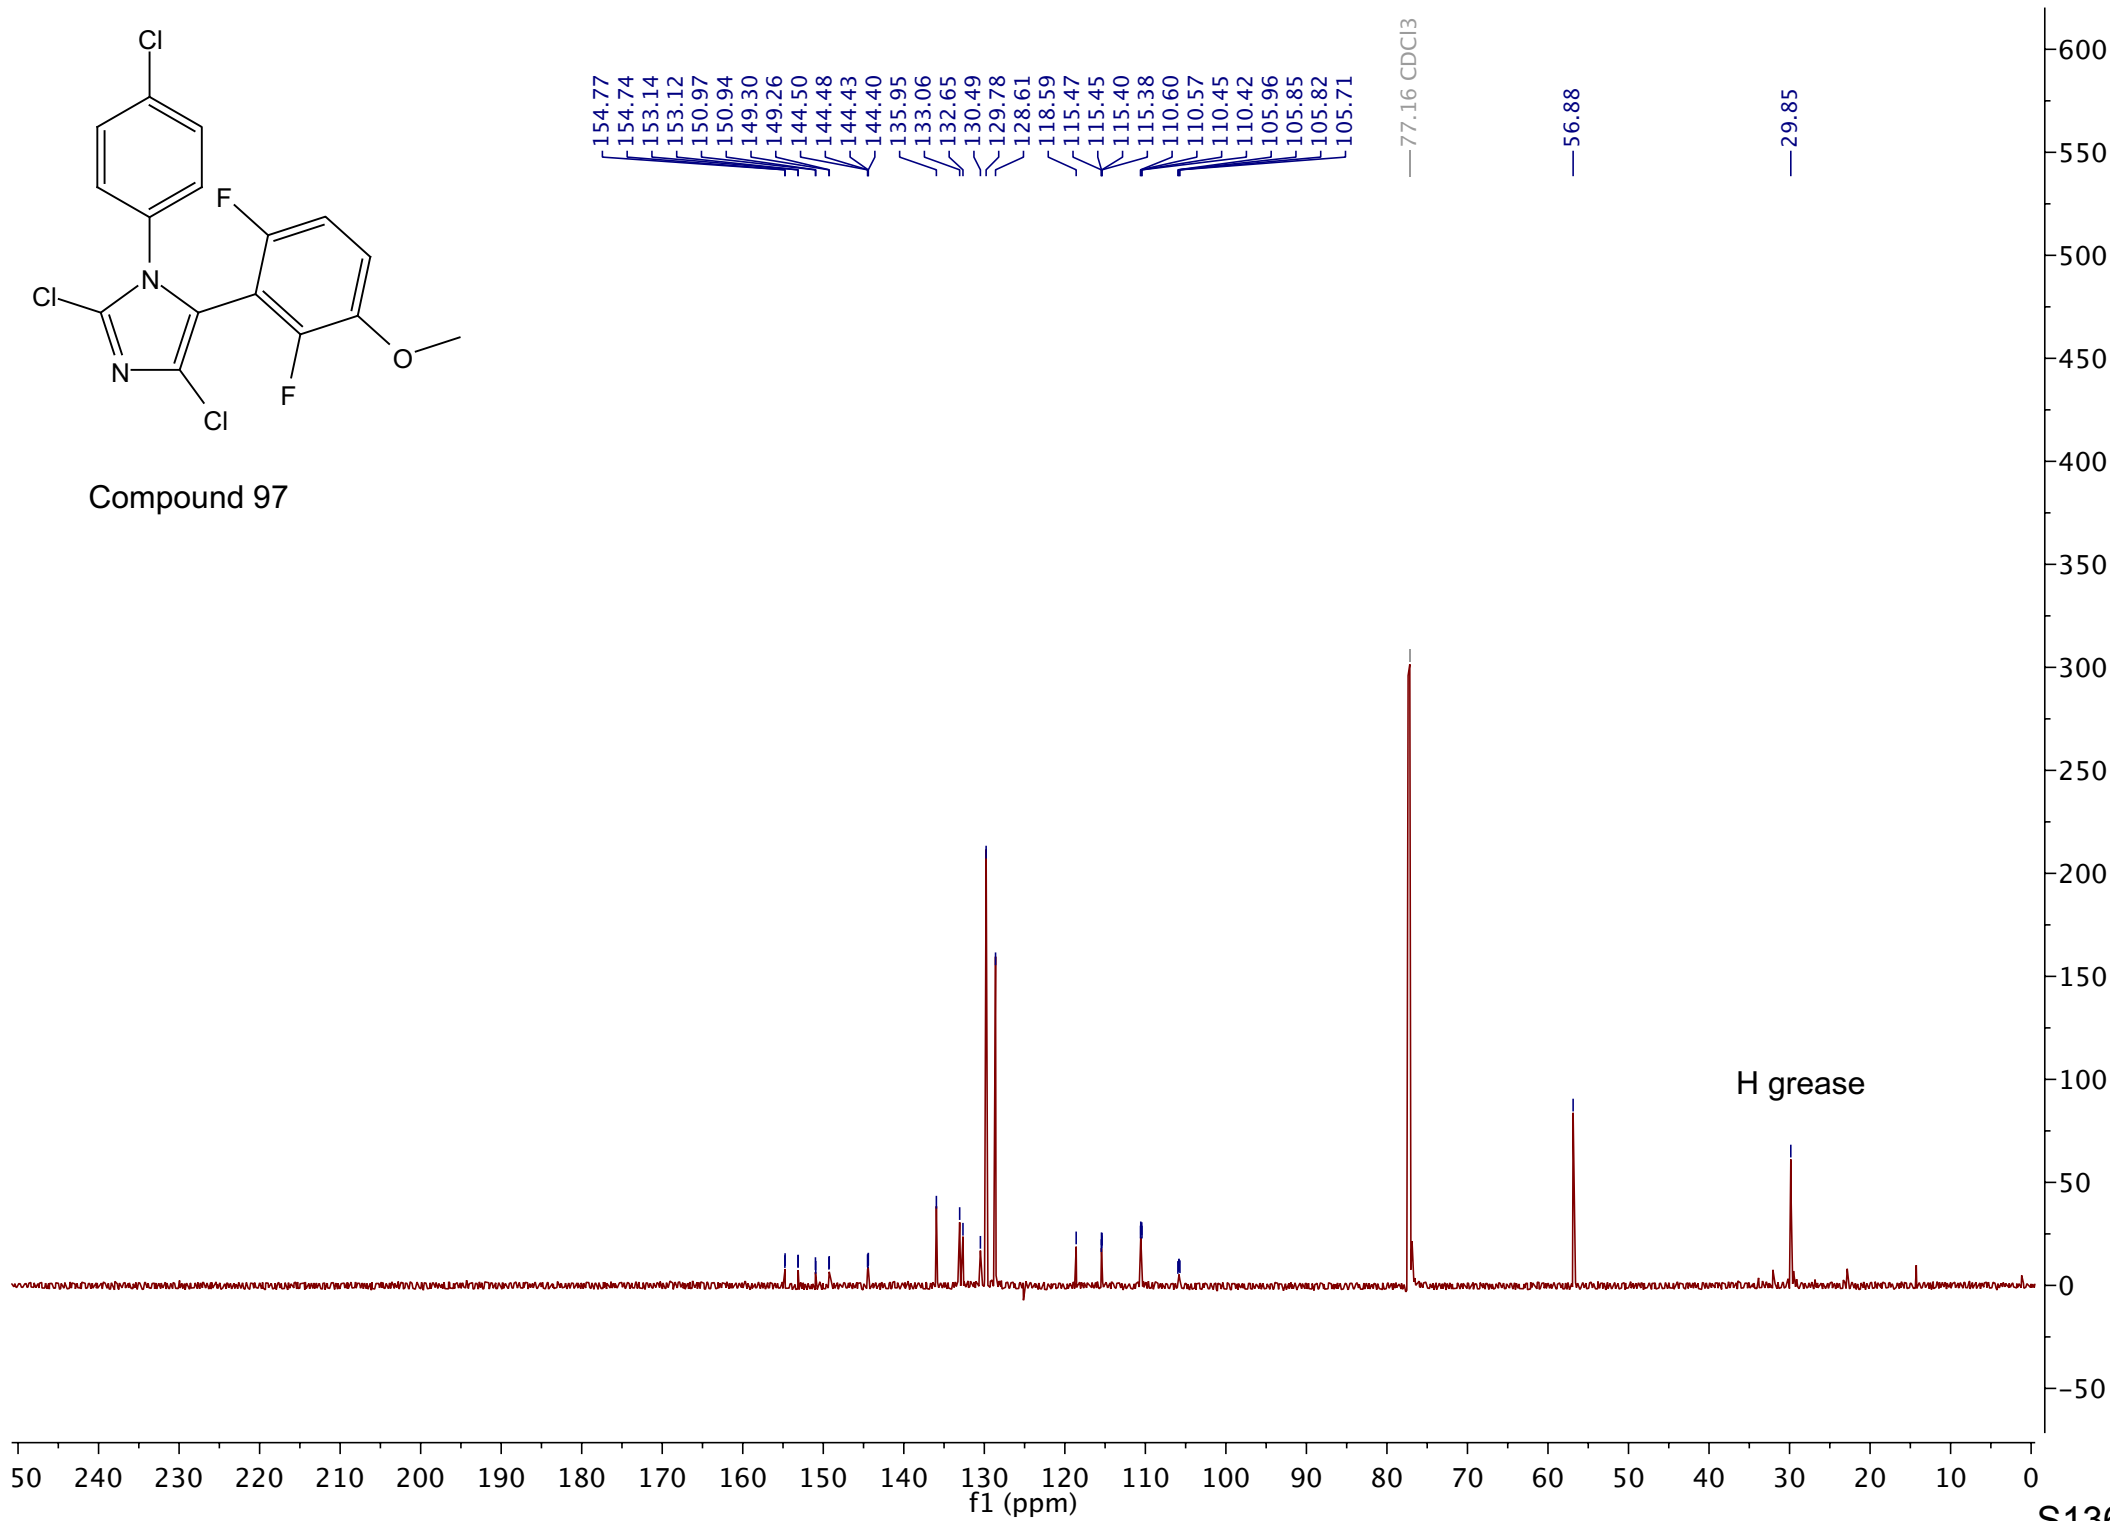



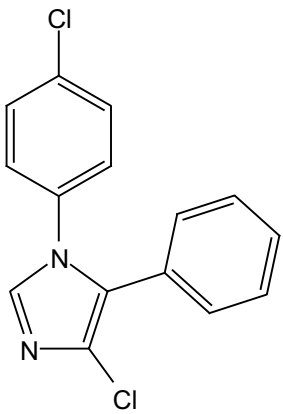

Compound 98

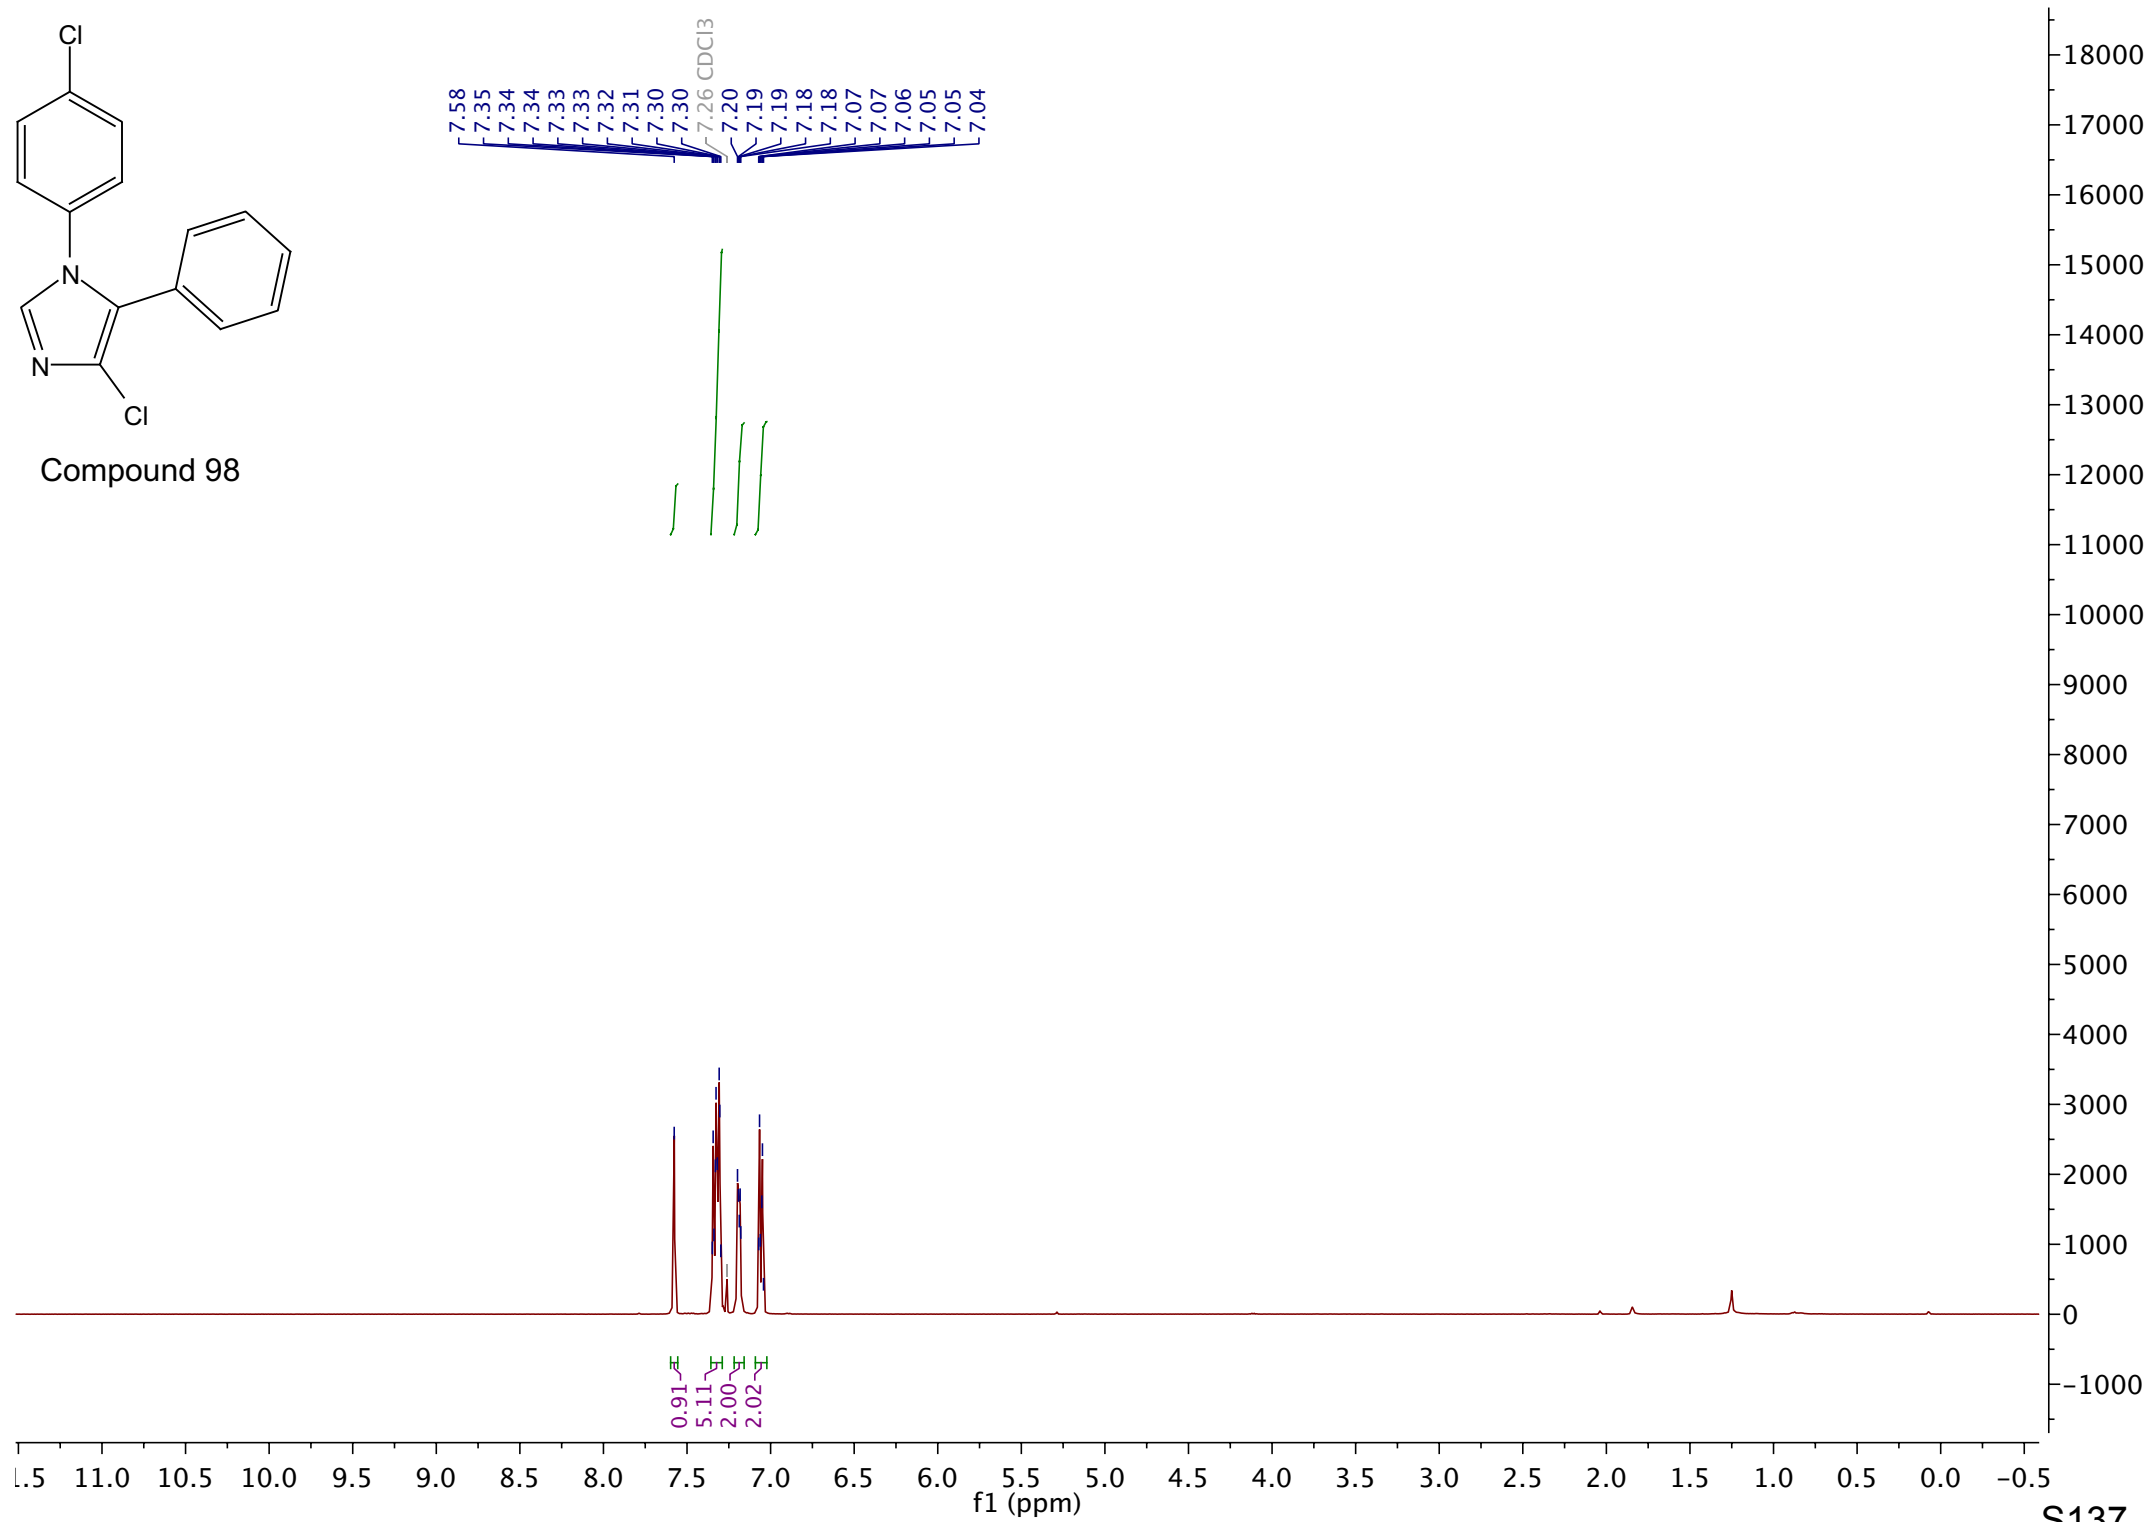

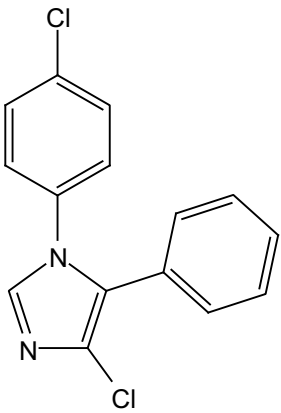

Compound 98

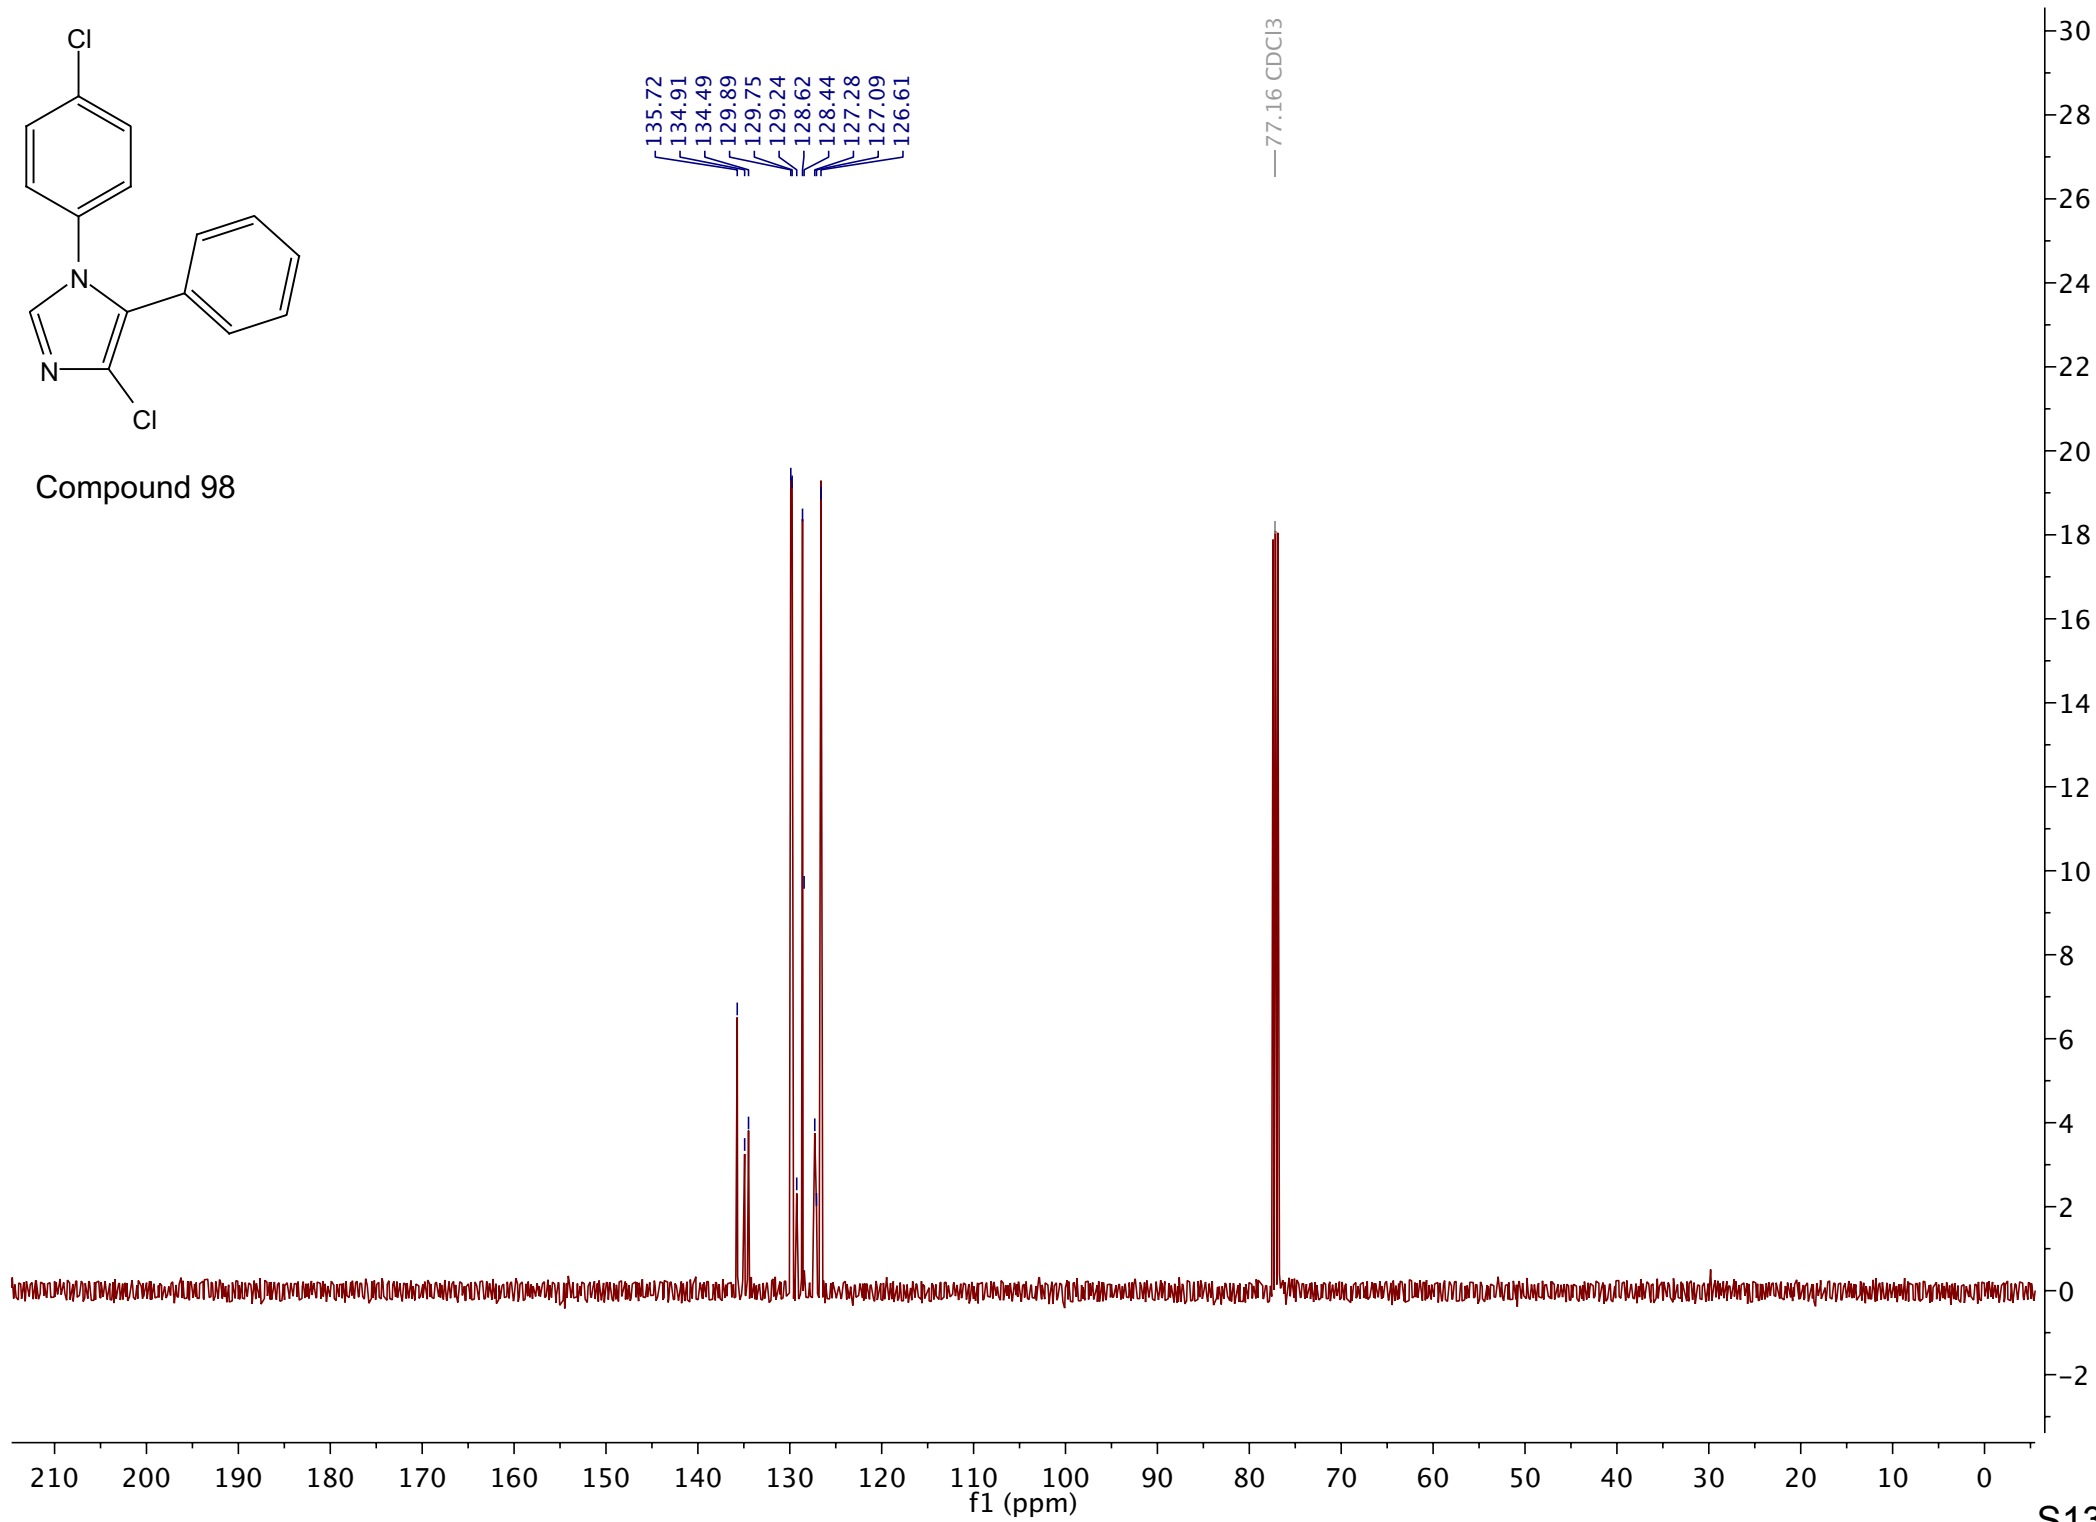

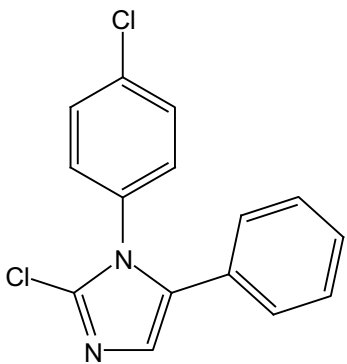

Compound 99

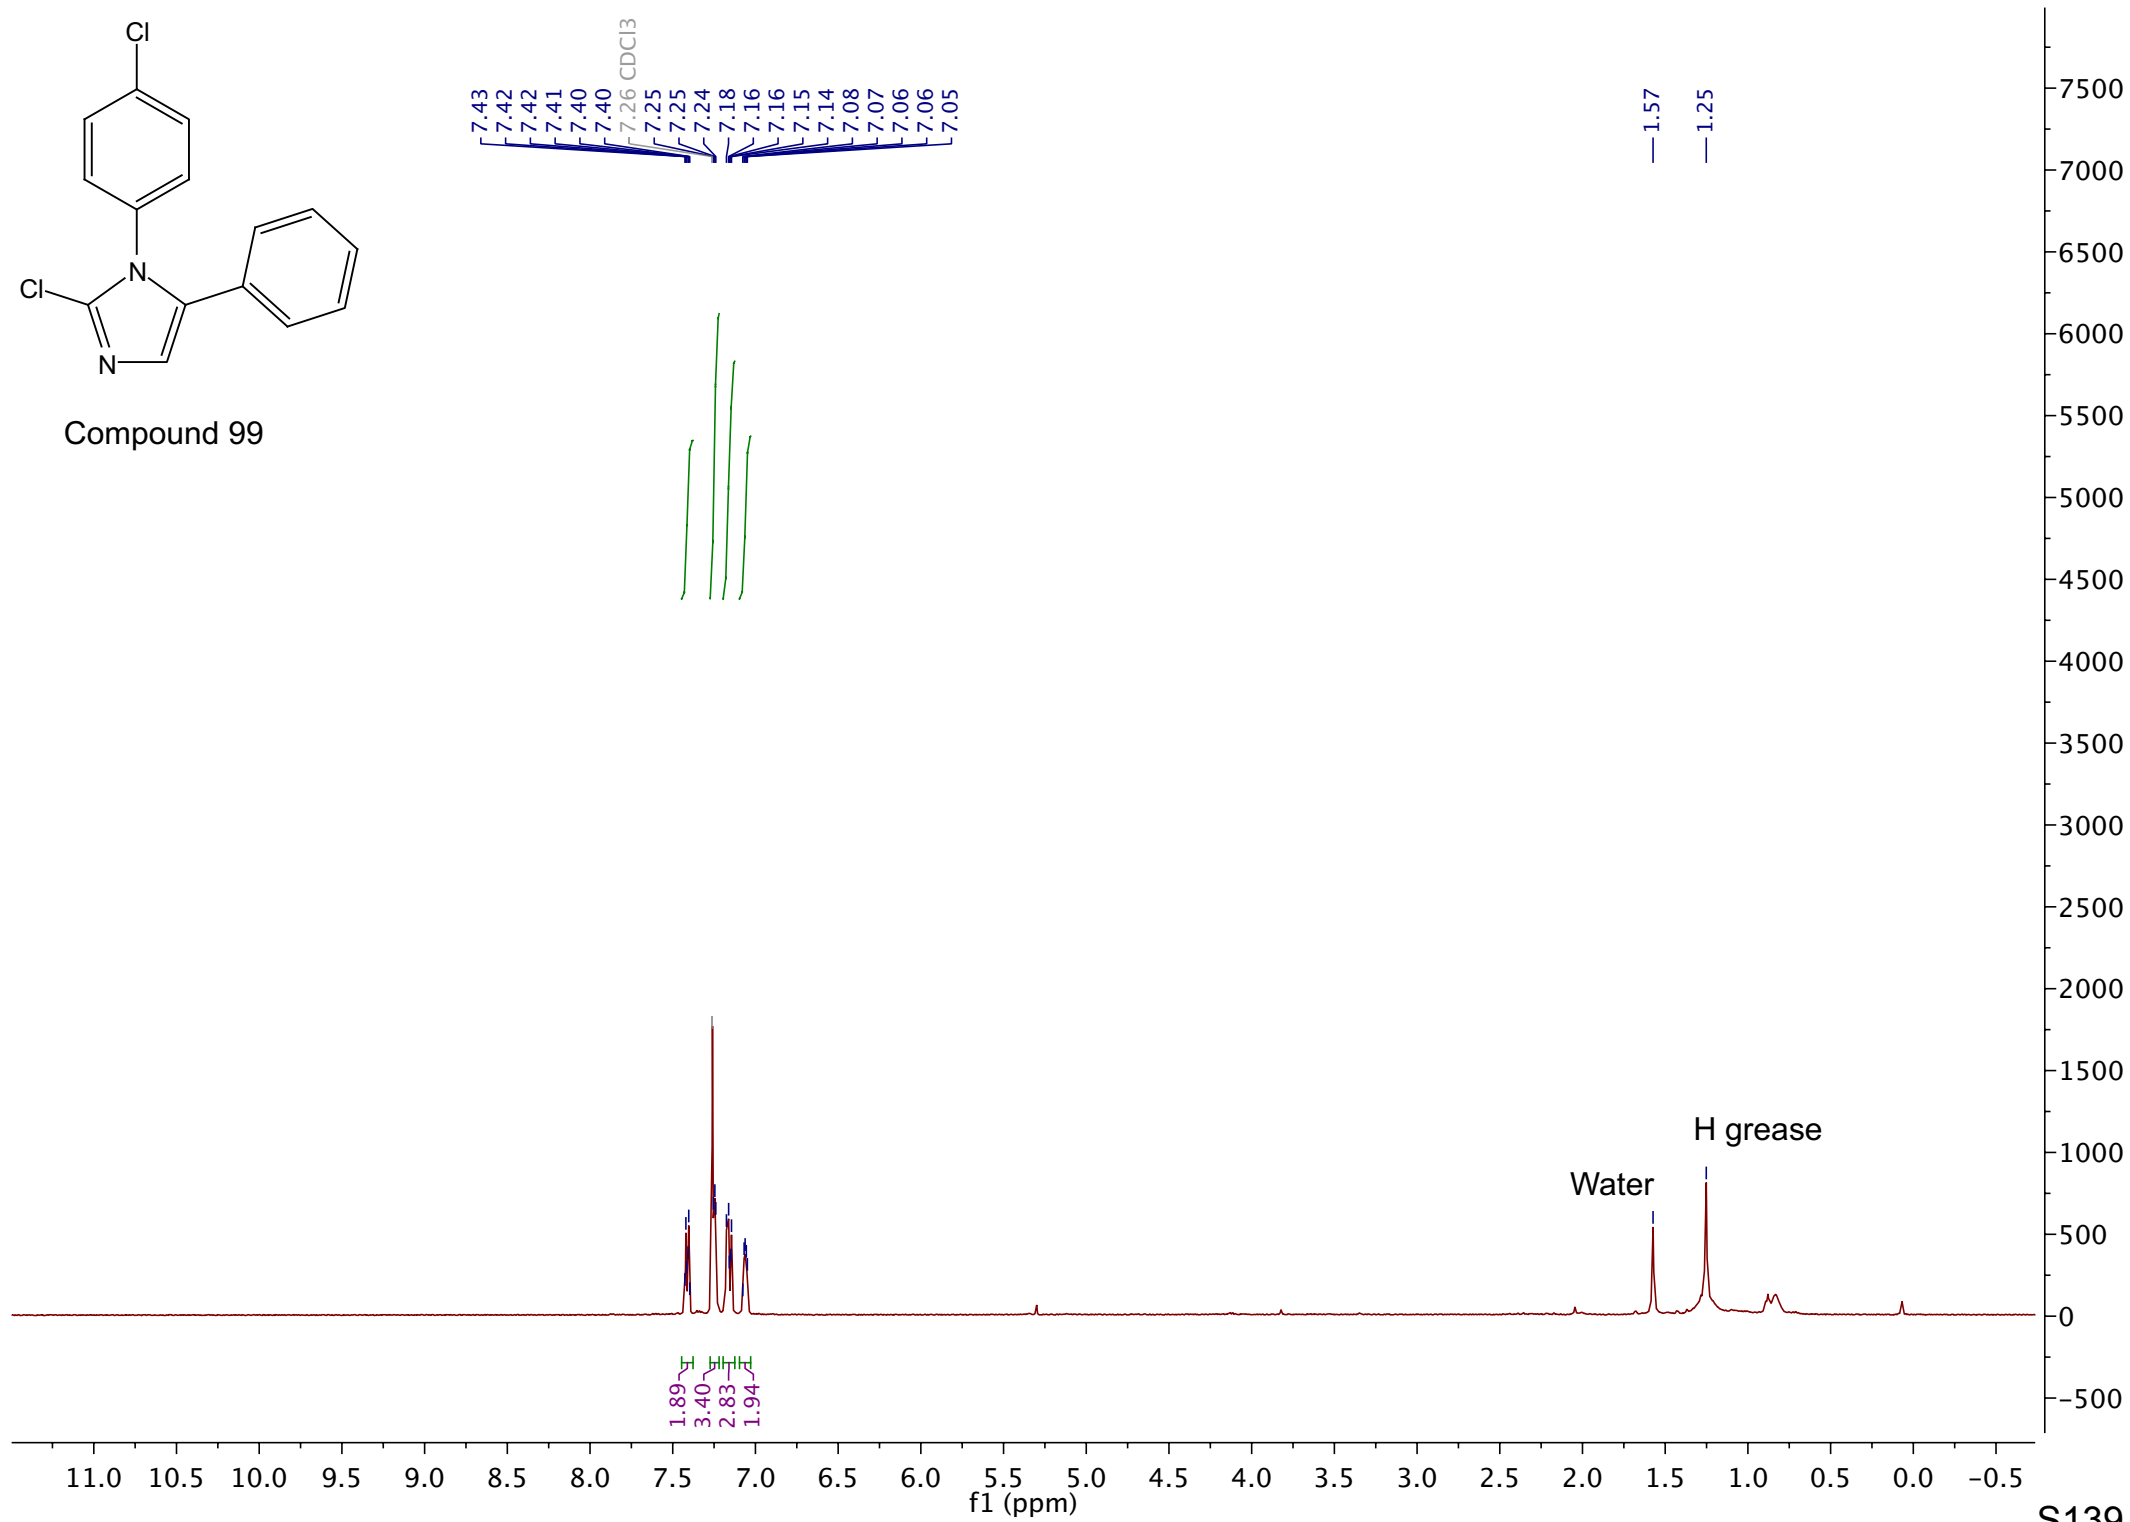

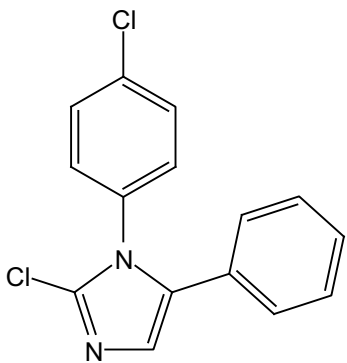

Compound 99

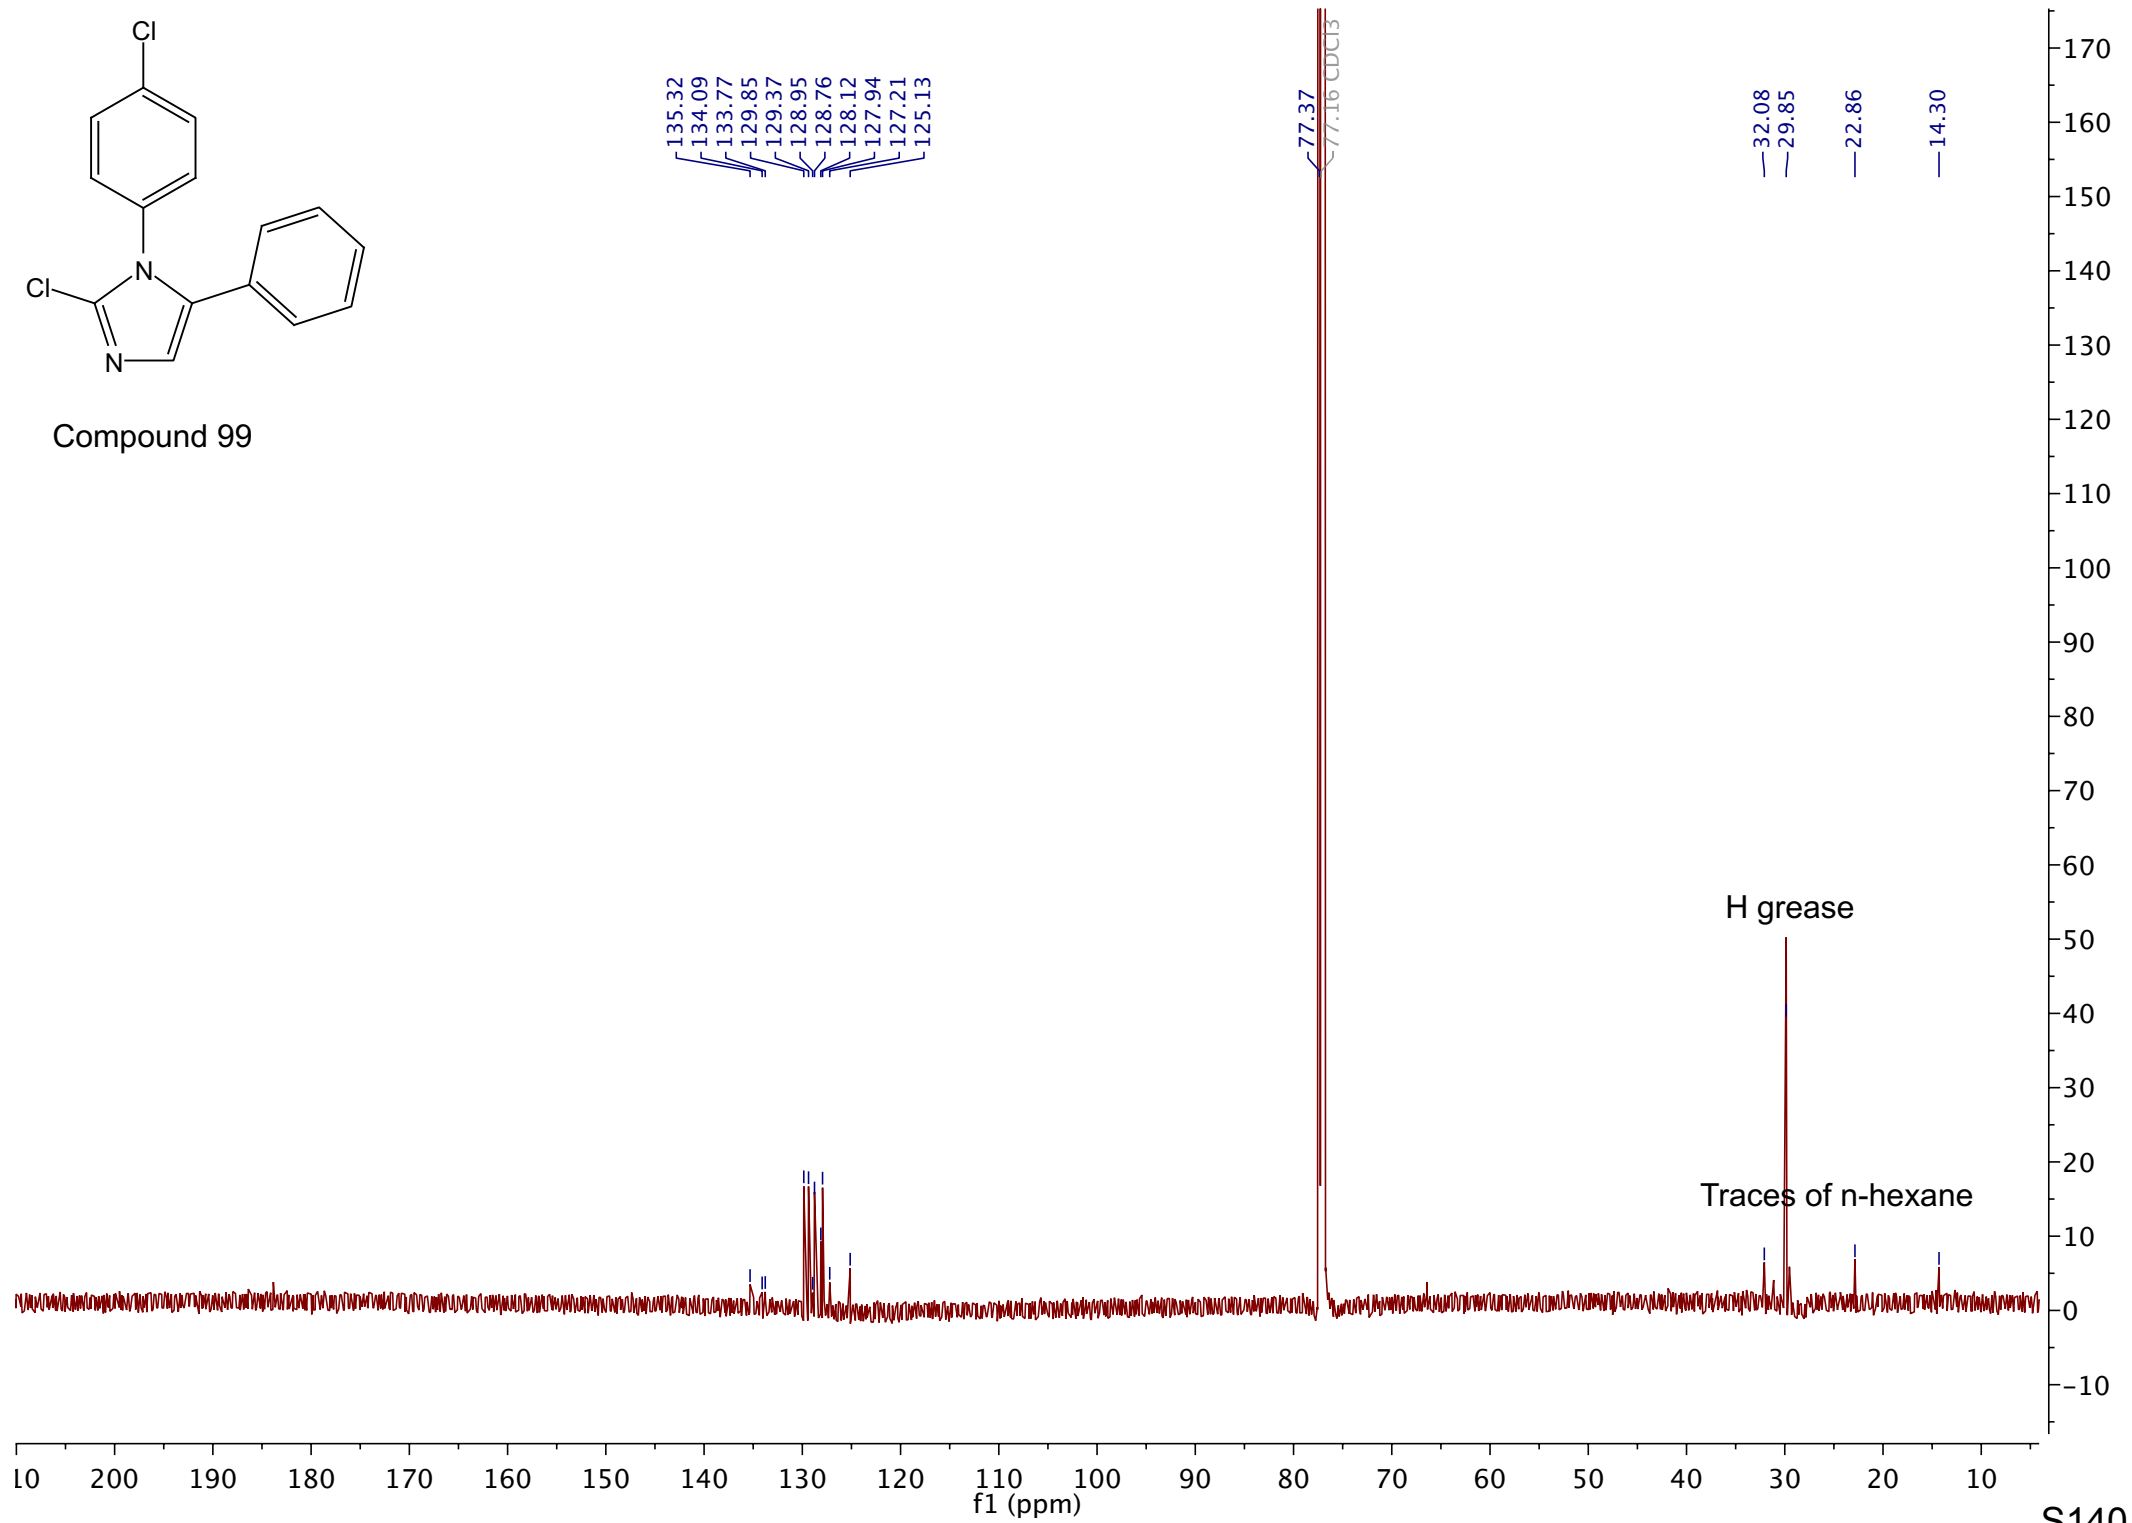

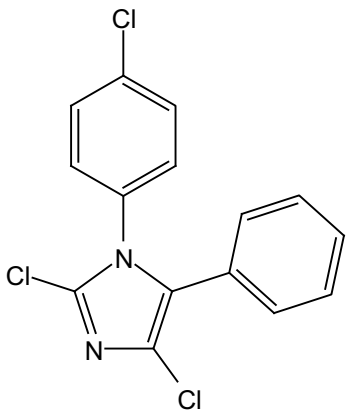

Compound 100

7.39  
7.39  
7.38  
7.37  
7.37  
7.37  
7.29  
7.29  
7.28  
7.28  
7.26 CDCl3  
7.16  
7.15  
7.14  
7.14  
7.14  
7.13  
7.13  
7.12  
7.11  
7.11  
7.10  
7.09  
7.09

— 1.60  
— 1.25

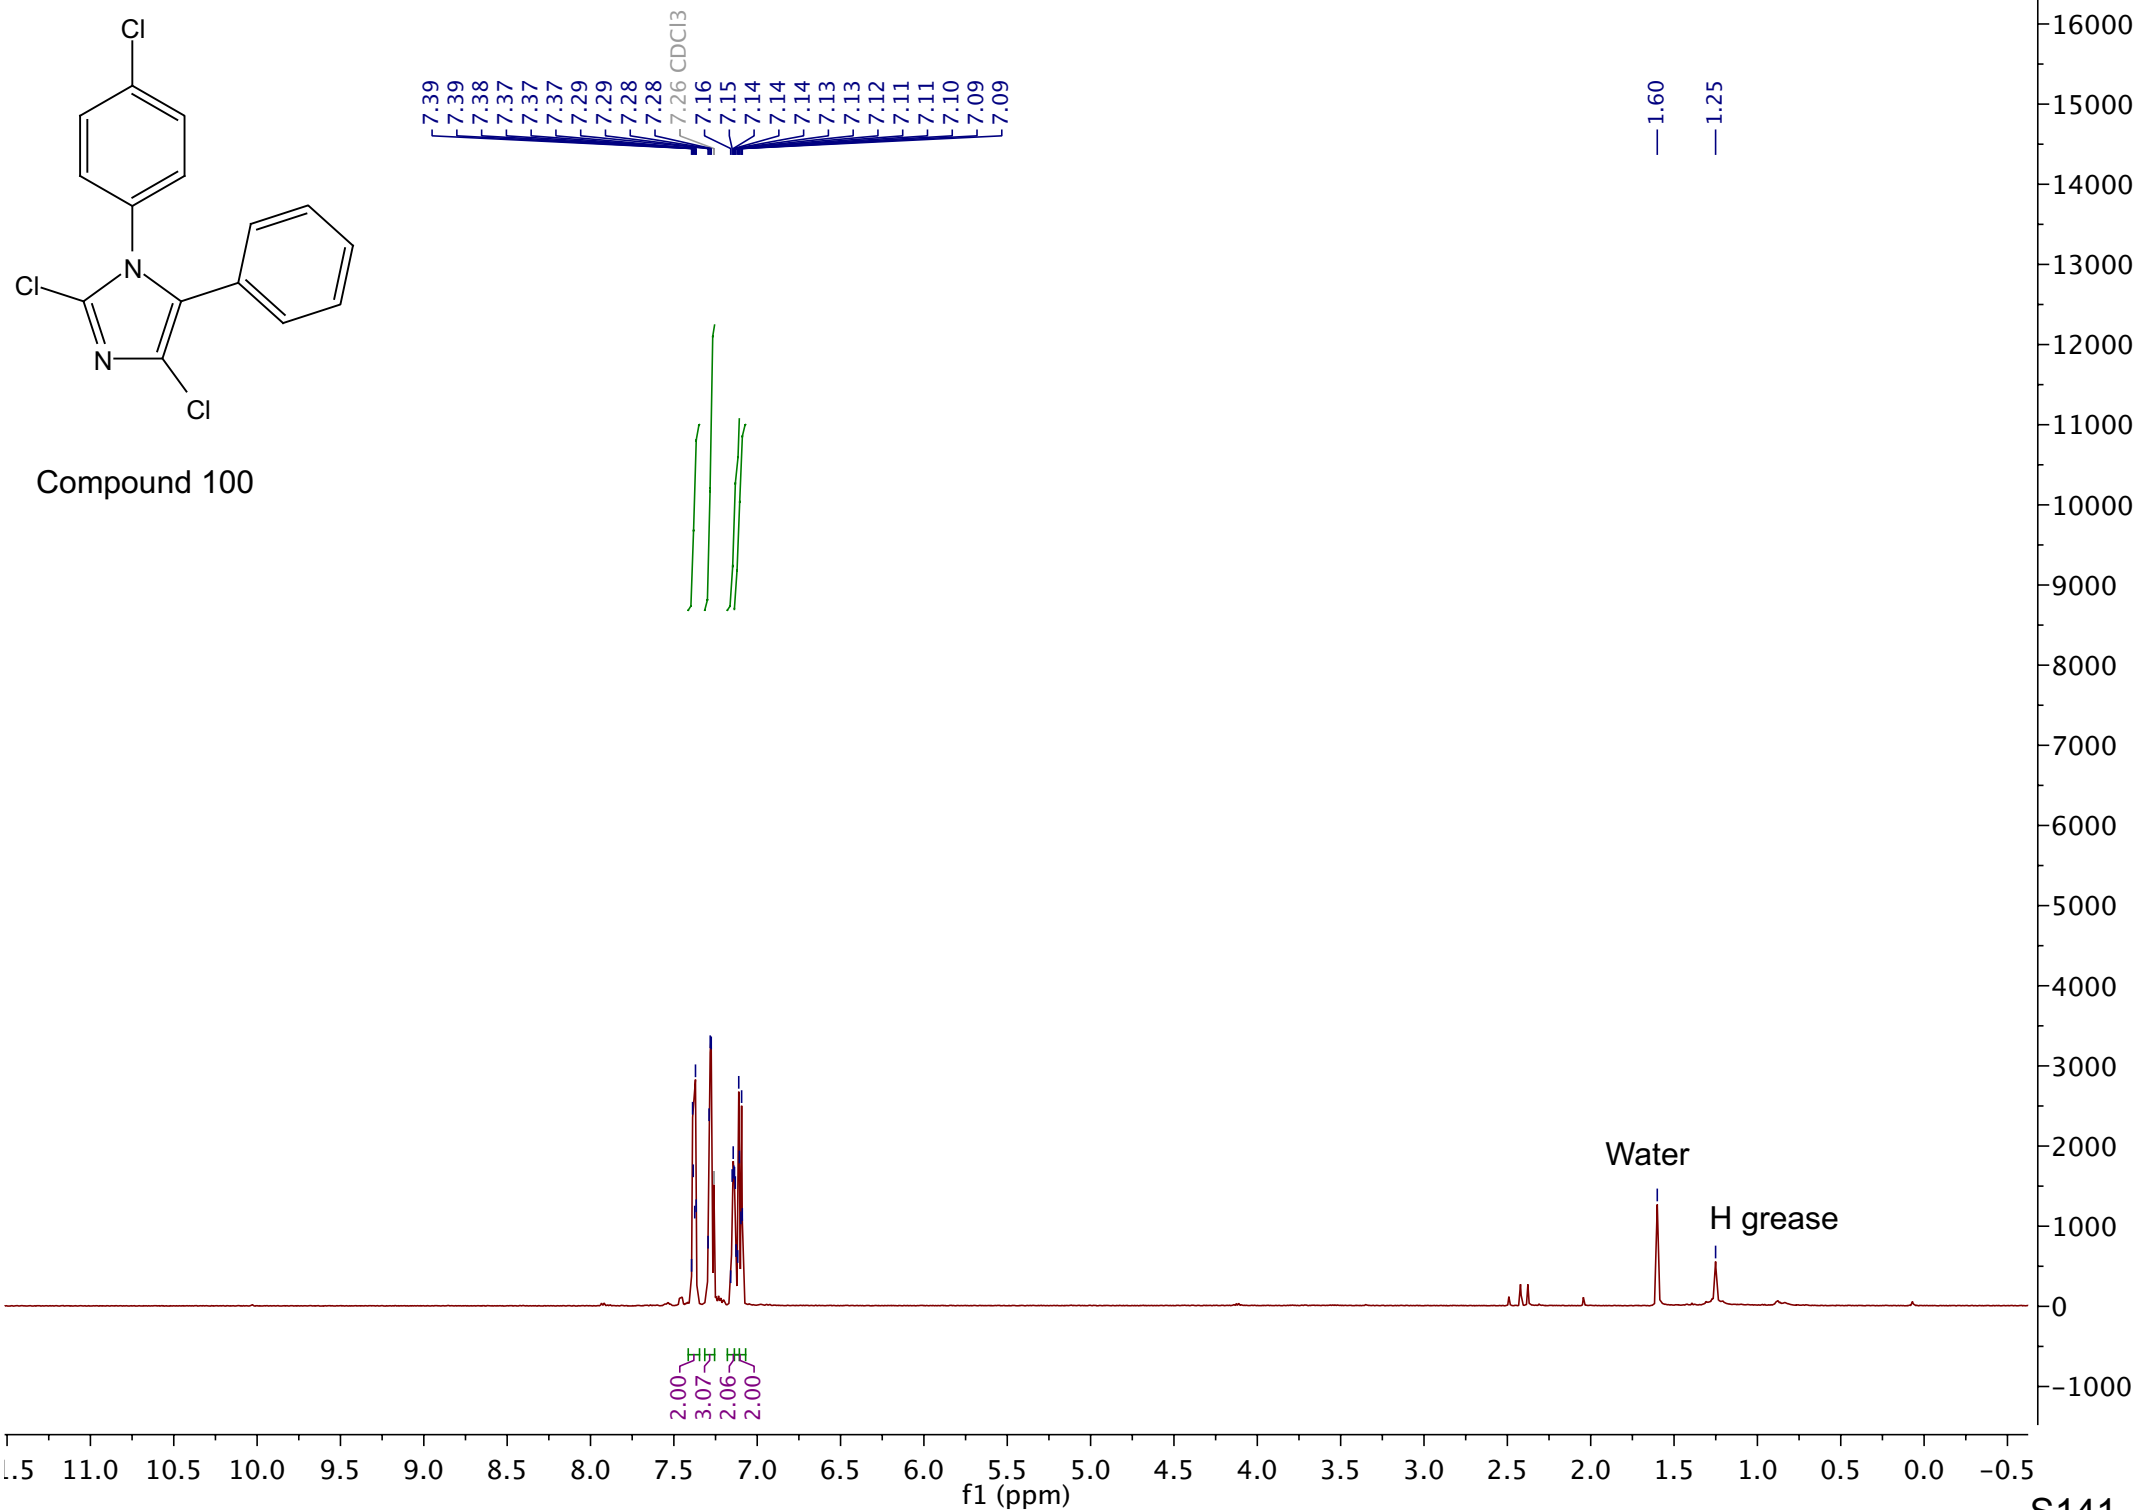

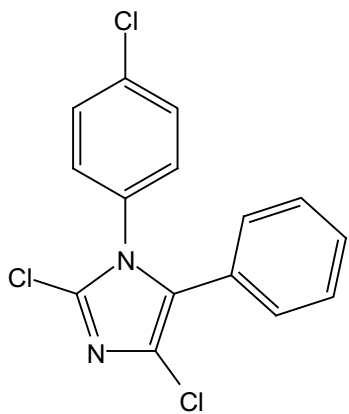

Compound 100

135.64  
133.57  
131.34  
129.89  
129.59  
129.21  
128.71  
128.65  
127.20  
127.05

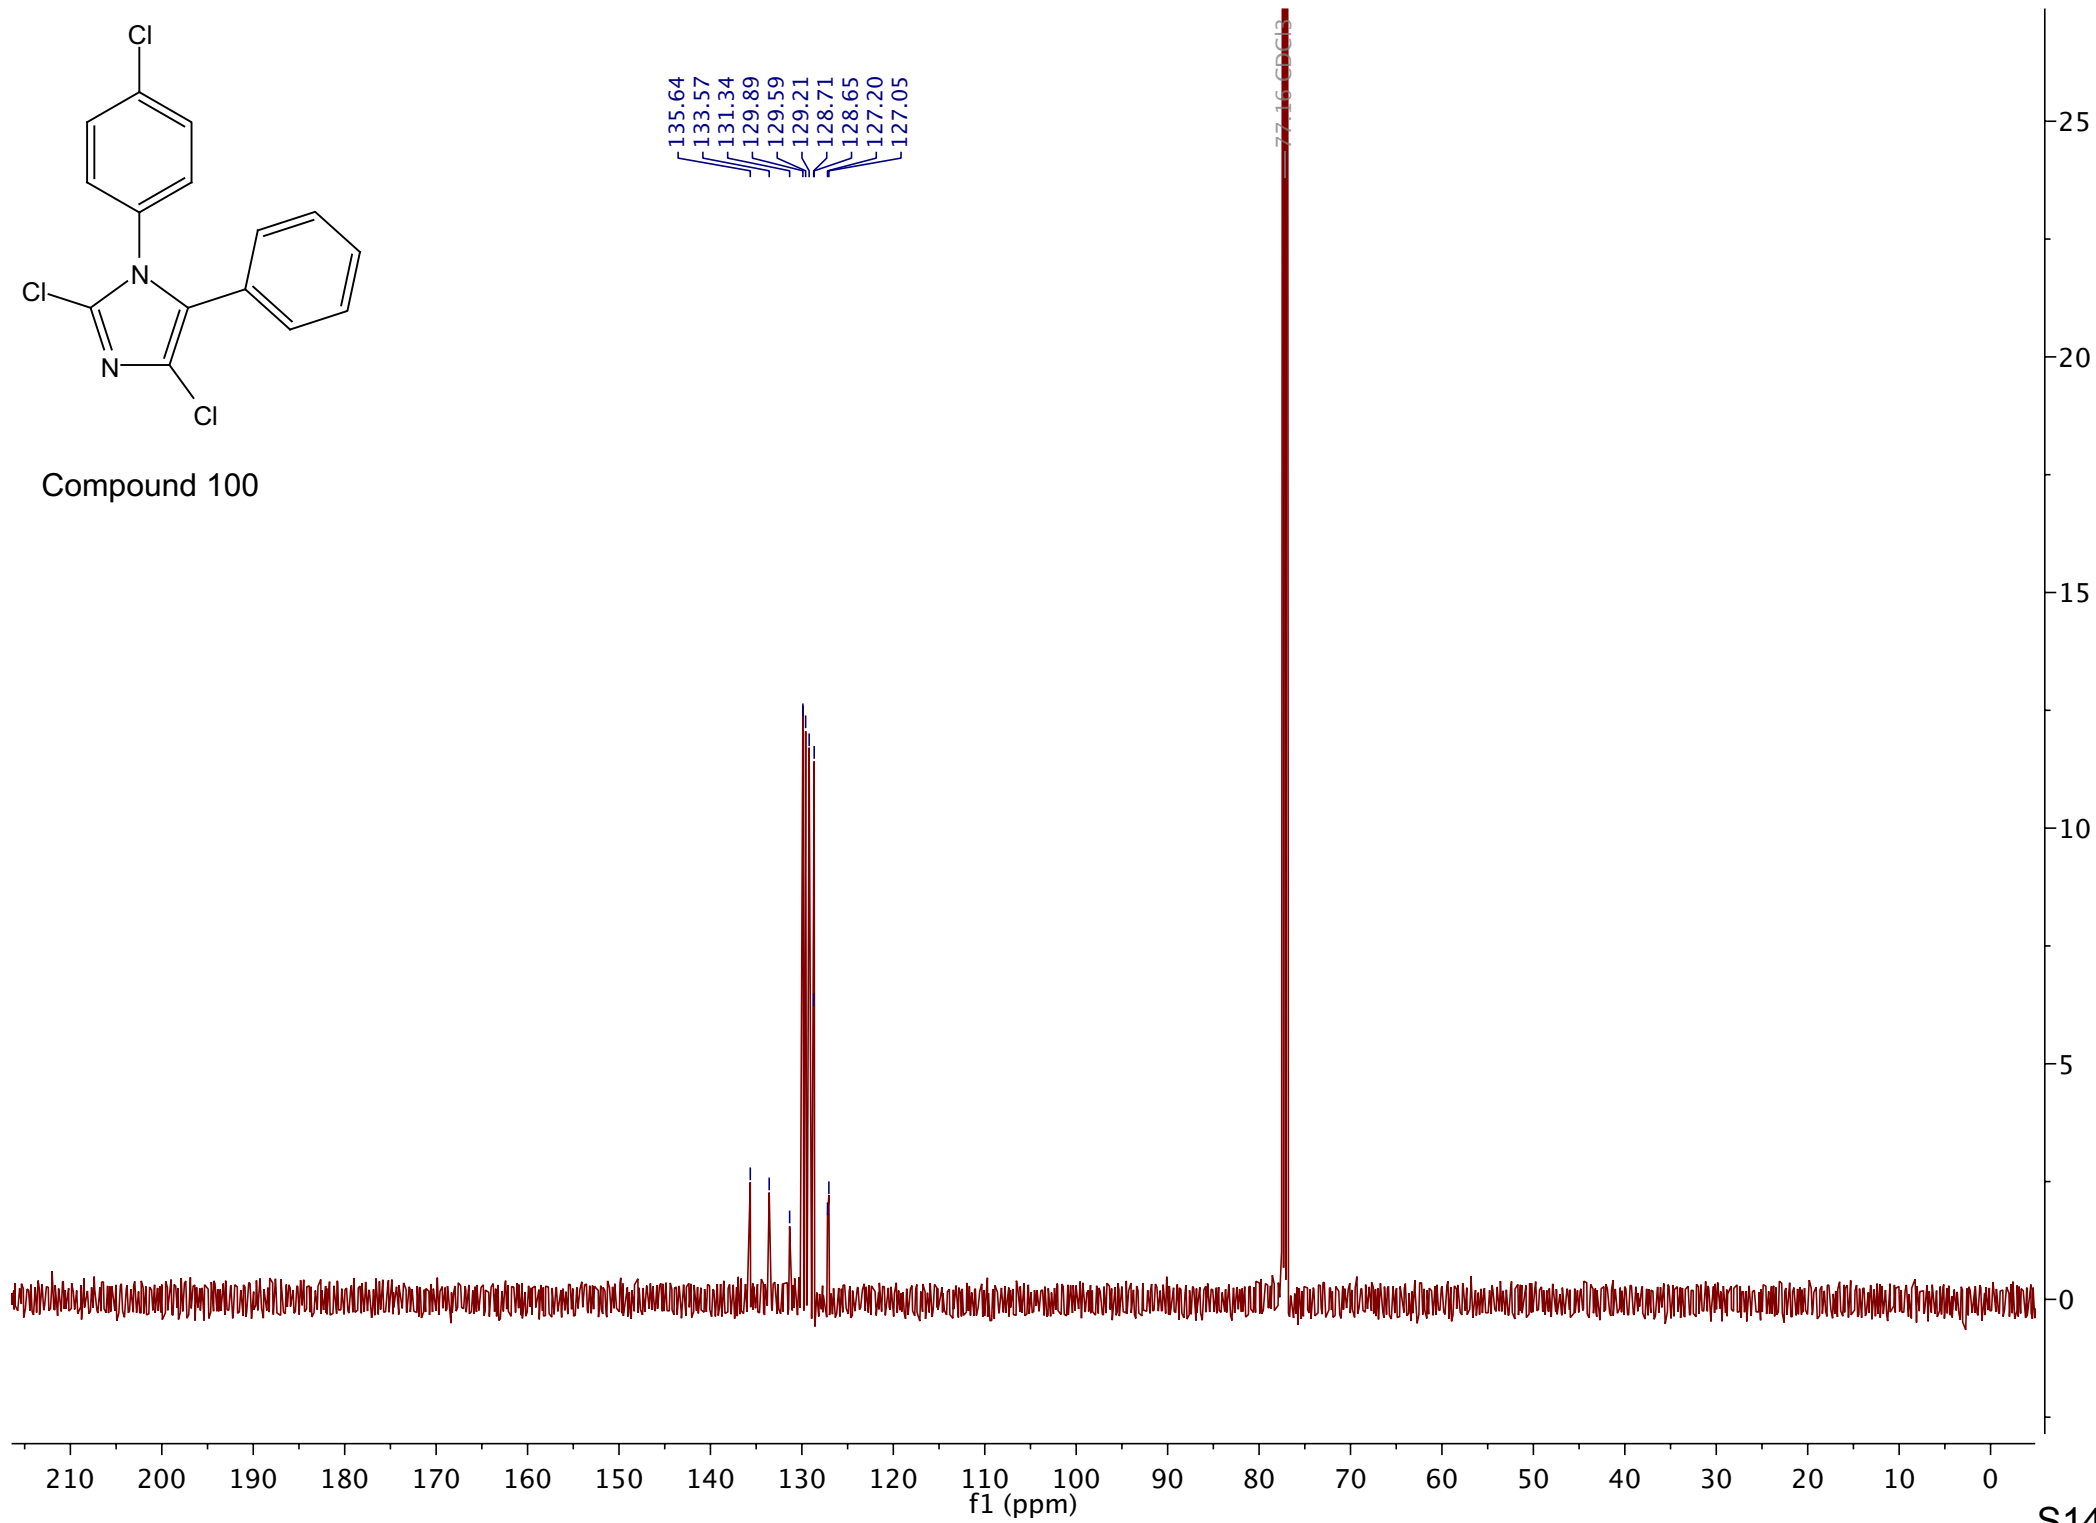

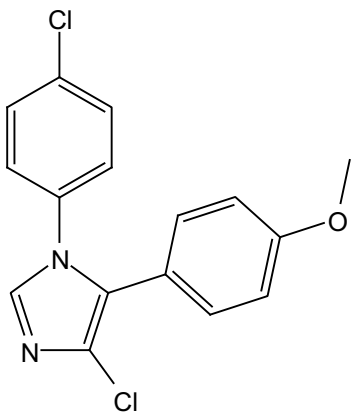

Compound 101

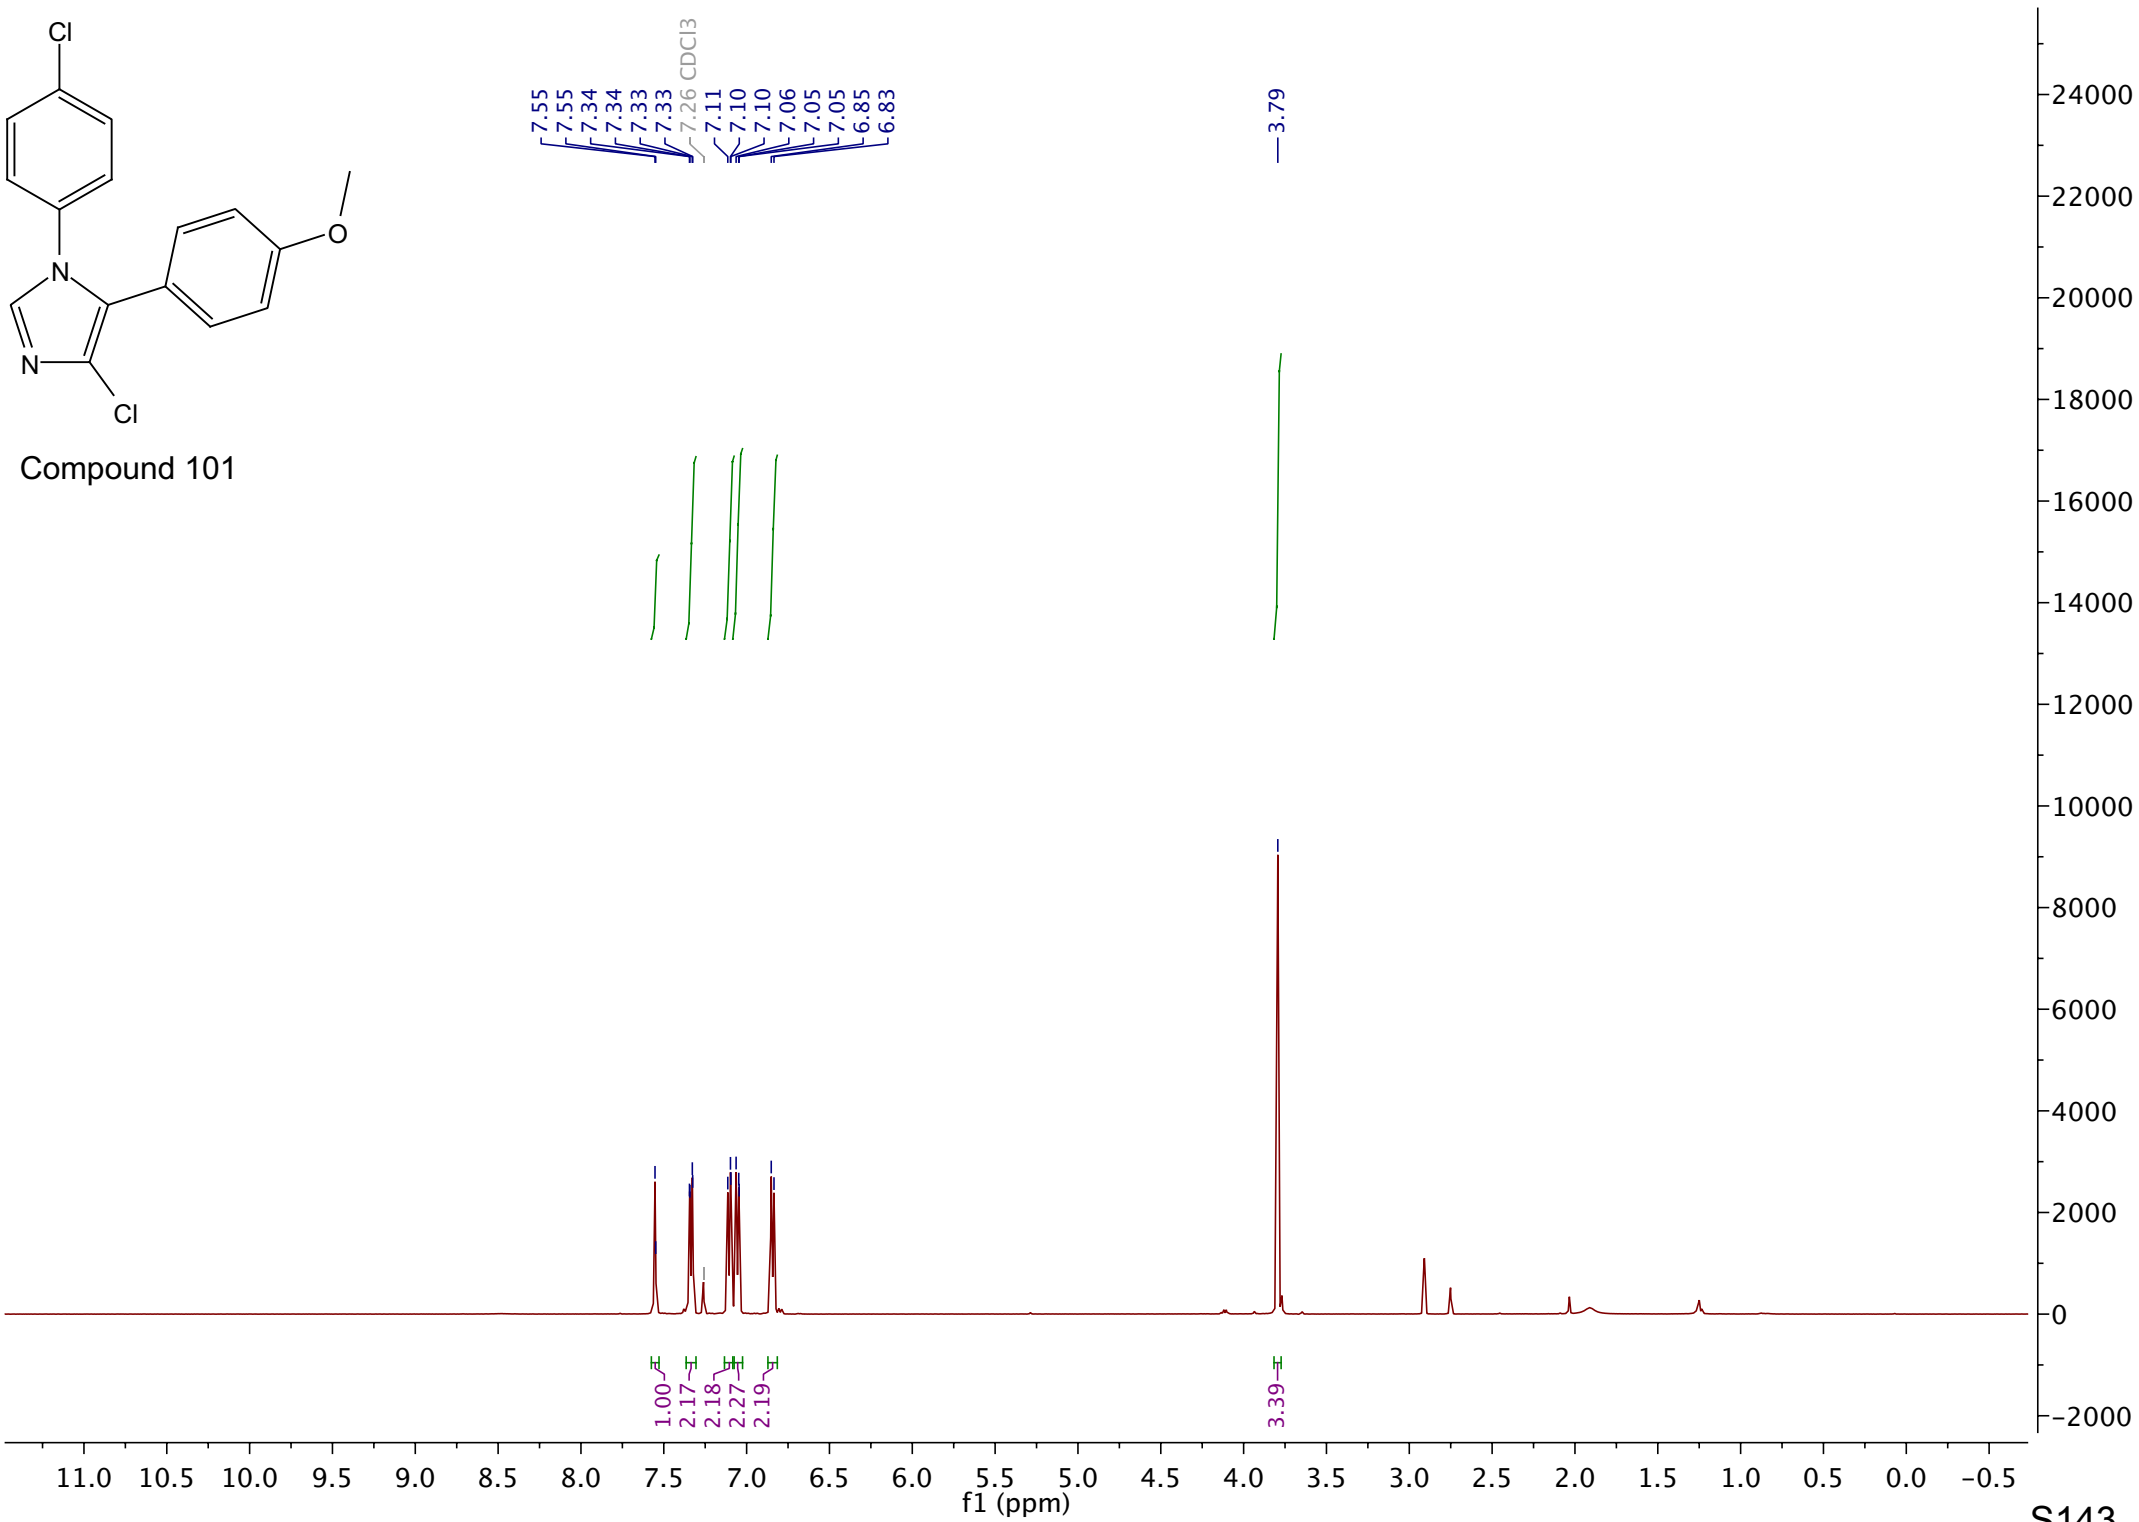

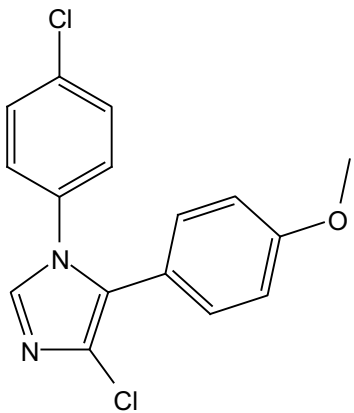

Compound 101

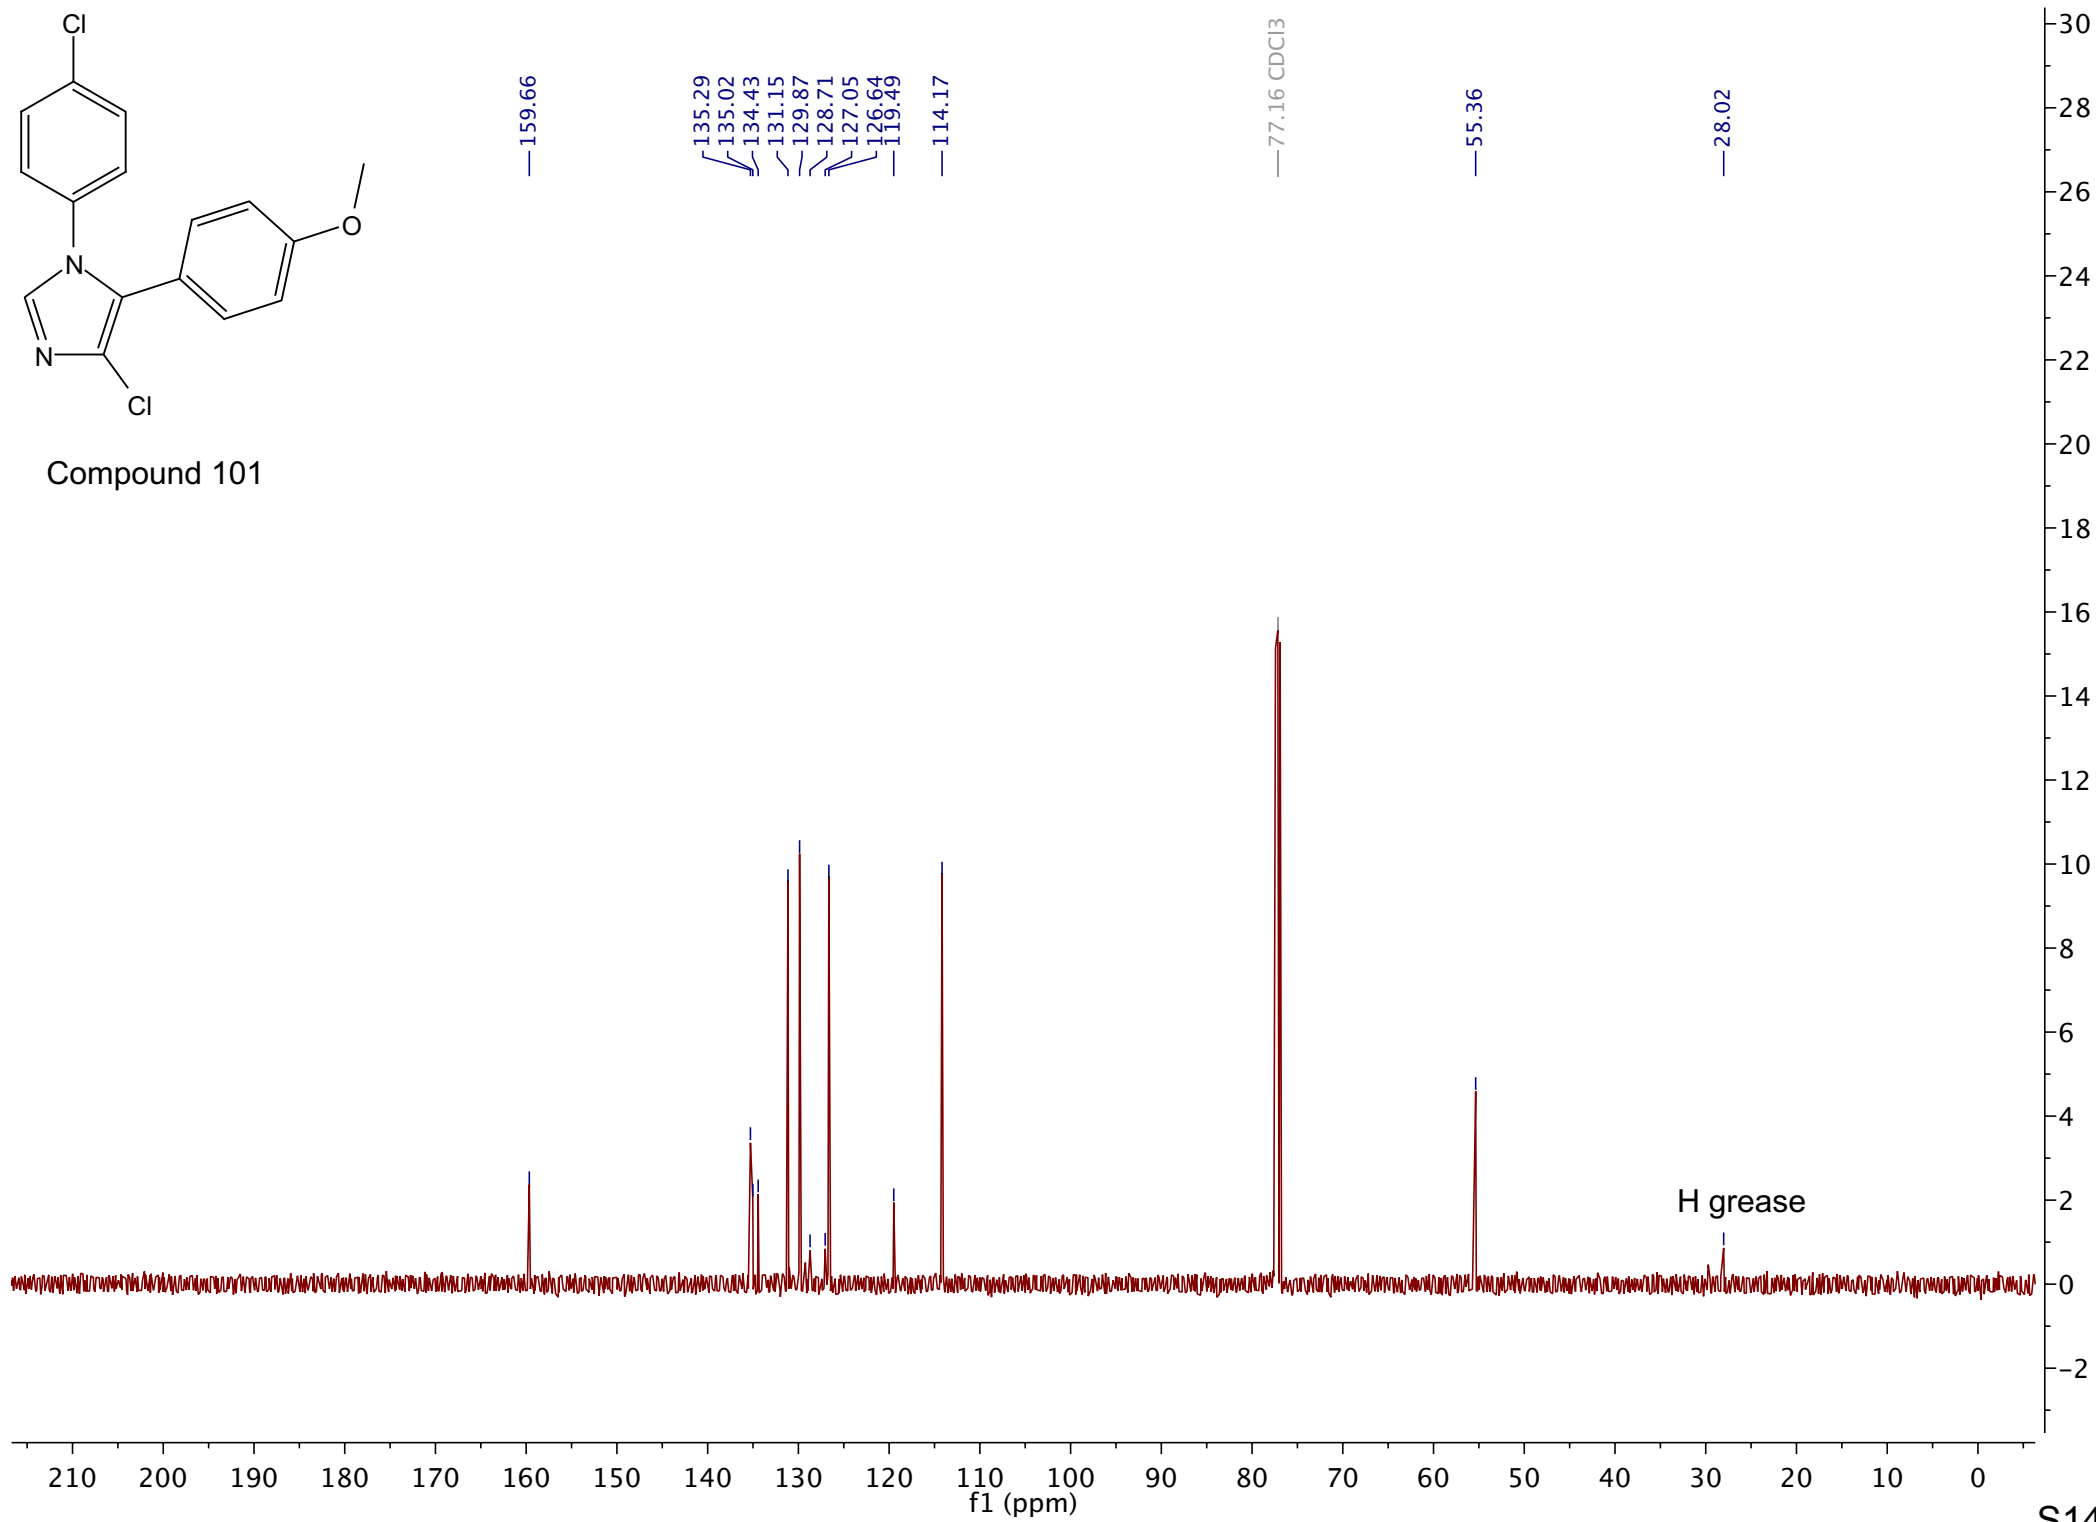



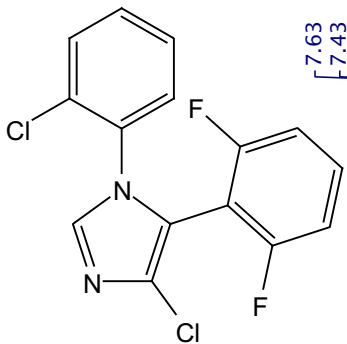

Compound 102

7.63  
7.43  
7.41  
7.35  
7.34  
7.34  
7.33  
7.33  
7.32  
7.31  
7.31  
7.30  
7.30  
7.29  
7.28  
7.27  
7.27  
7.26 CDCl<sub>3</sub>  
6.86  
6.84  
6.83

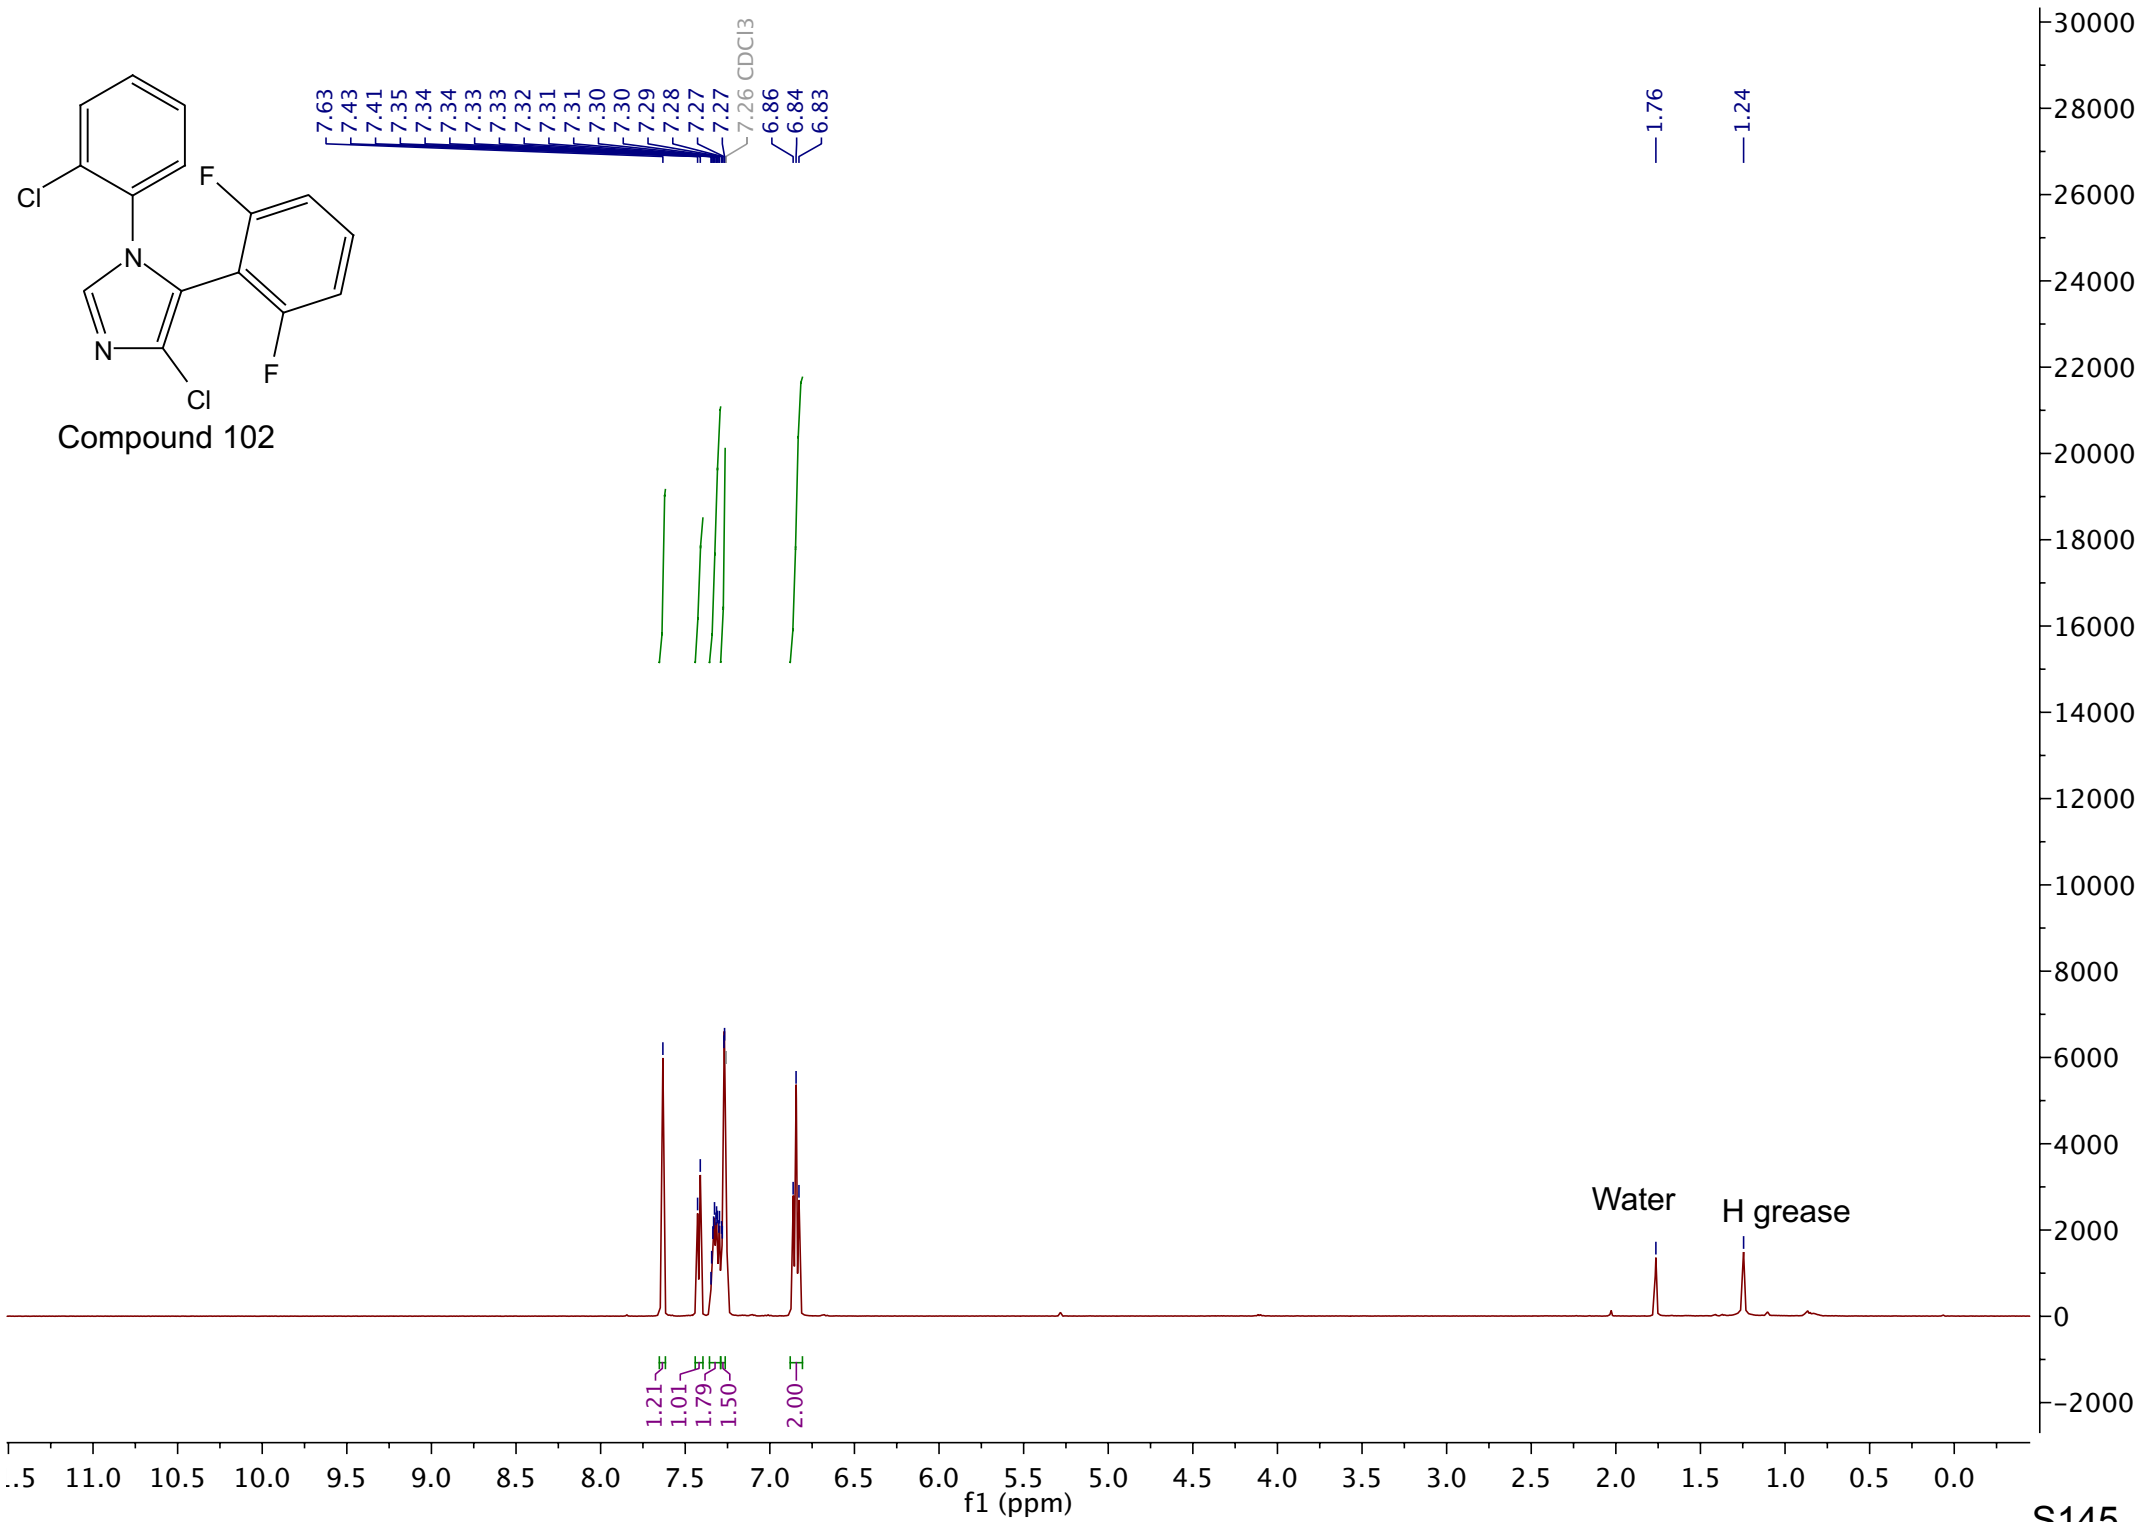

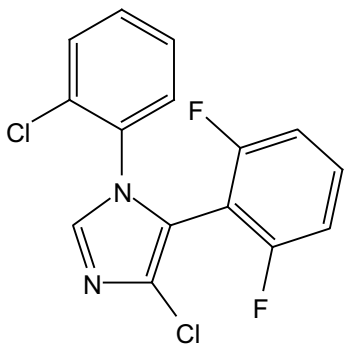

Compound 102

161.80  
161.75  
159.79  
159.74  
137.58  
133.55  
131.96  
131.88  
131.80  
131.70  
131.67  
130.73  
130.61  
129.10  
127.60  
117.02  
111.74  
111.71  
111.57  
111.54  
105.51  
105.35  
105.20

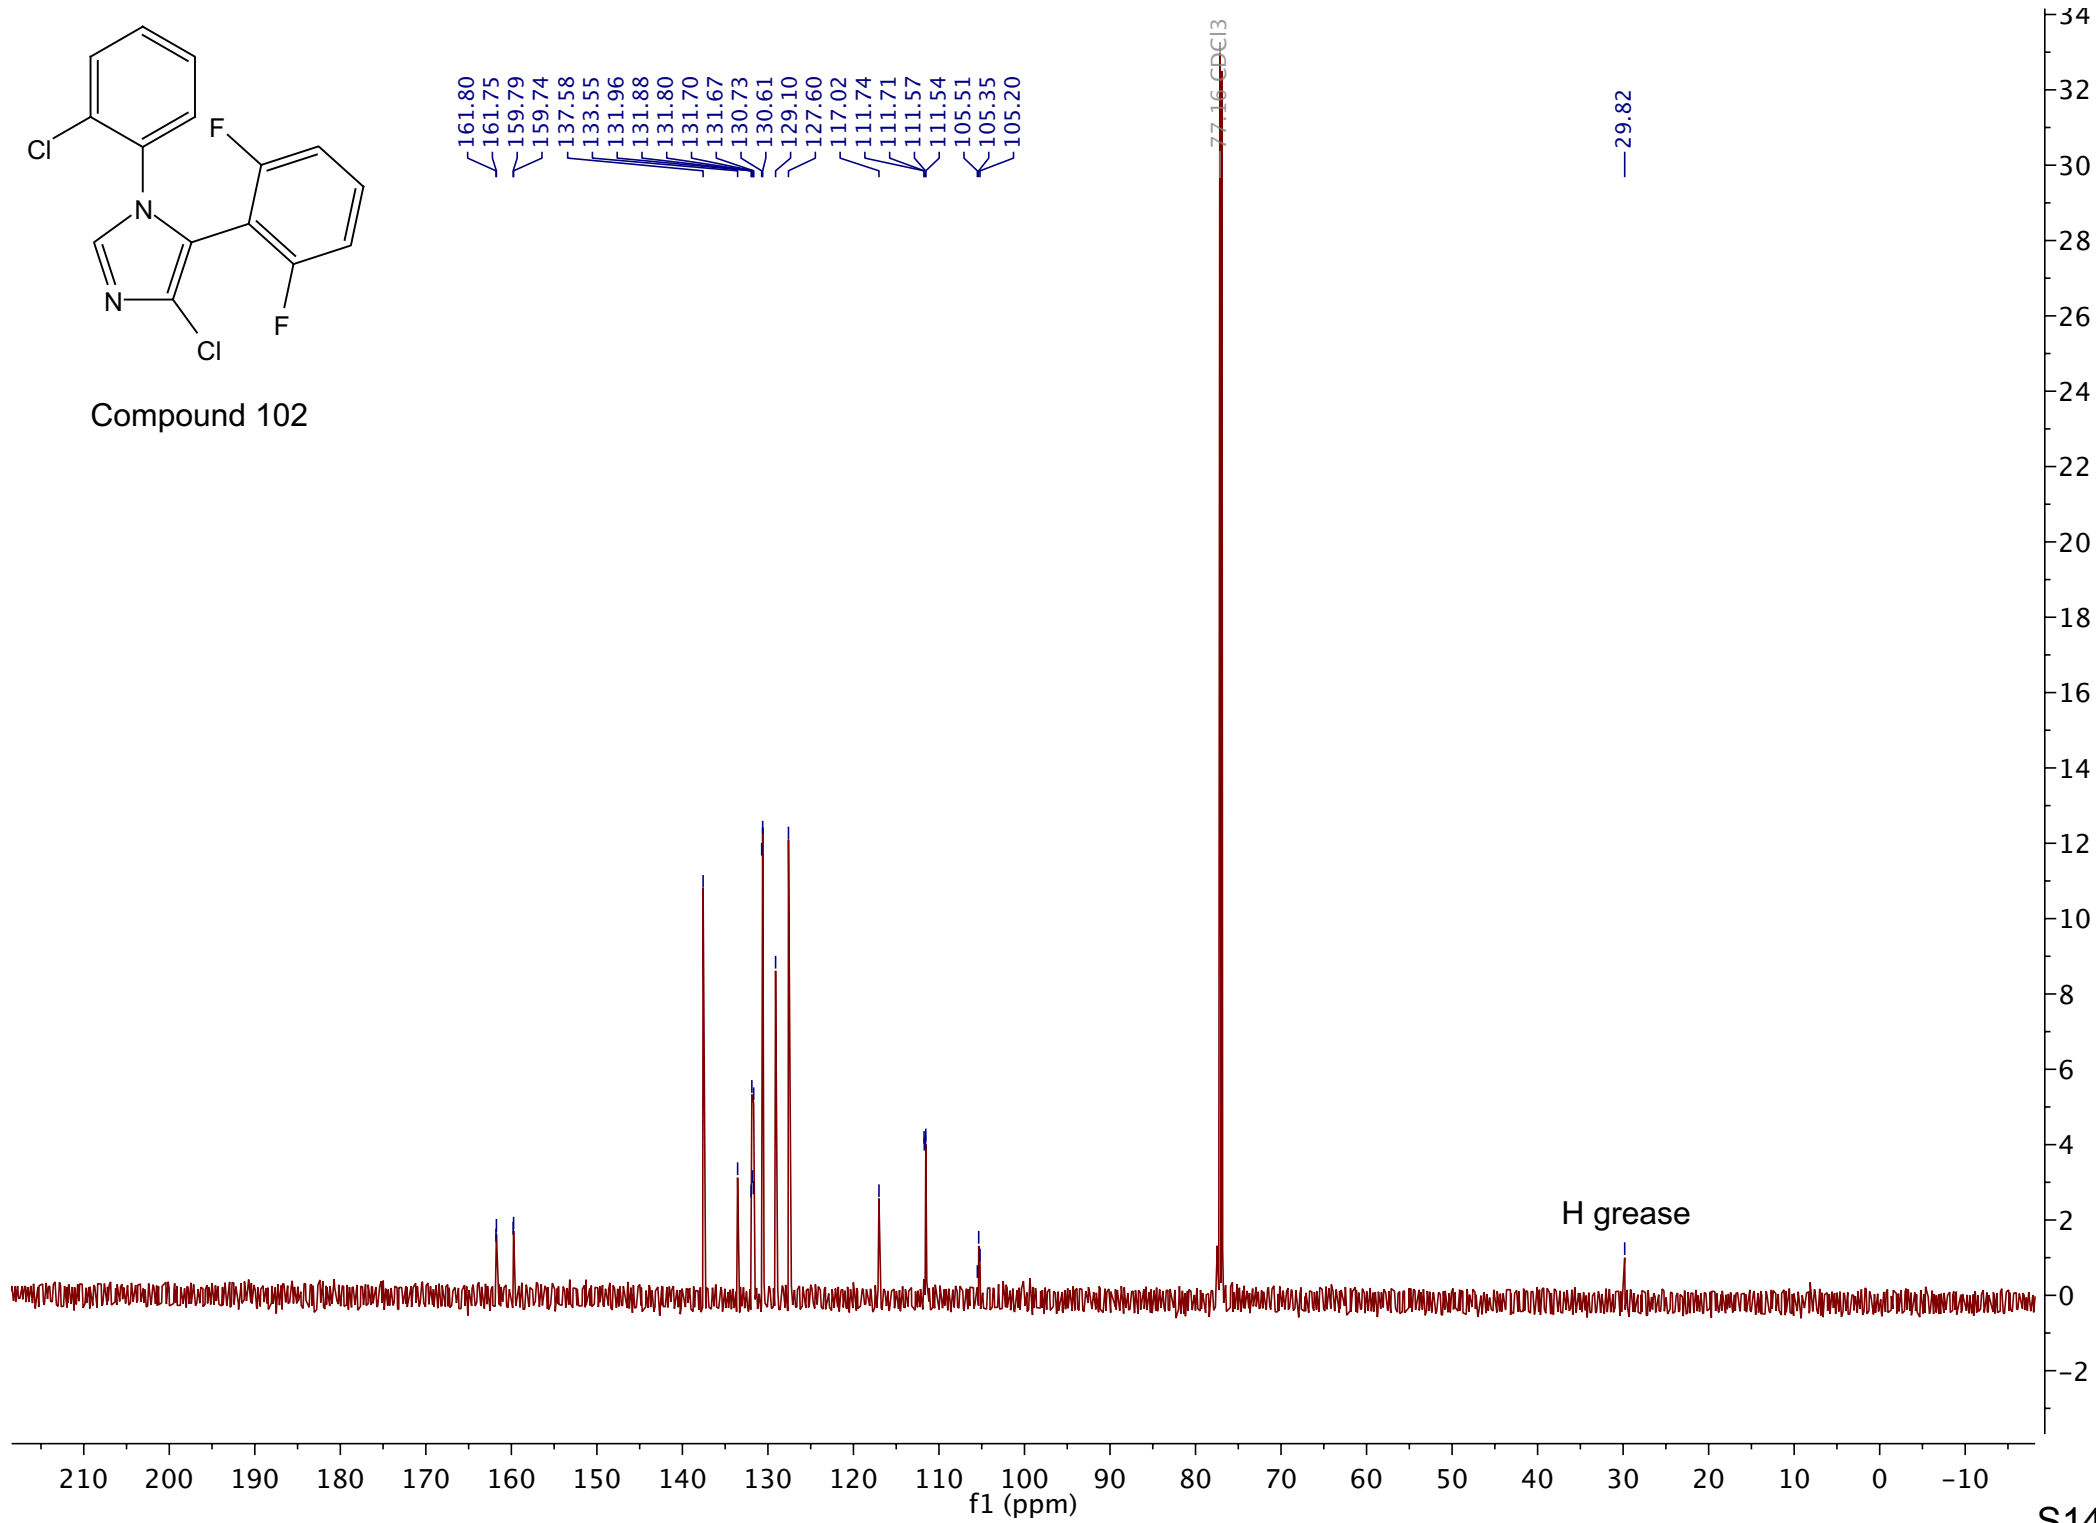

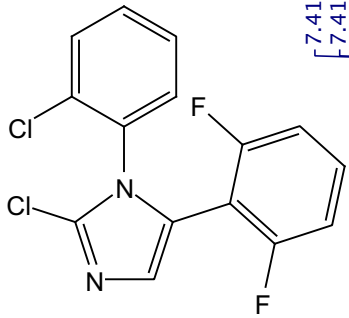

Compound 103

7.41  
7.41  
7.39  
7.34  
7.34  
7.33  
7.32  
7.31  
7.29  
7.29  
7.28 CDCl3  
7.24  
7.23  
7.22  
7.22  
7.20  
7.20  
7.19  
6.81  
6.80  
6.79  
6.77  
6.76

5.27  
5.27  
5.26

1.68

1.23

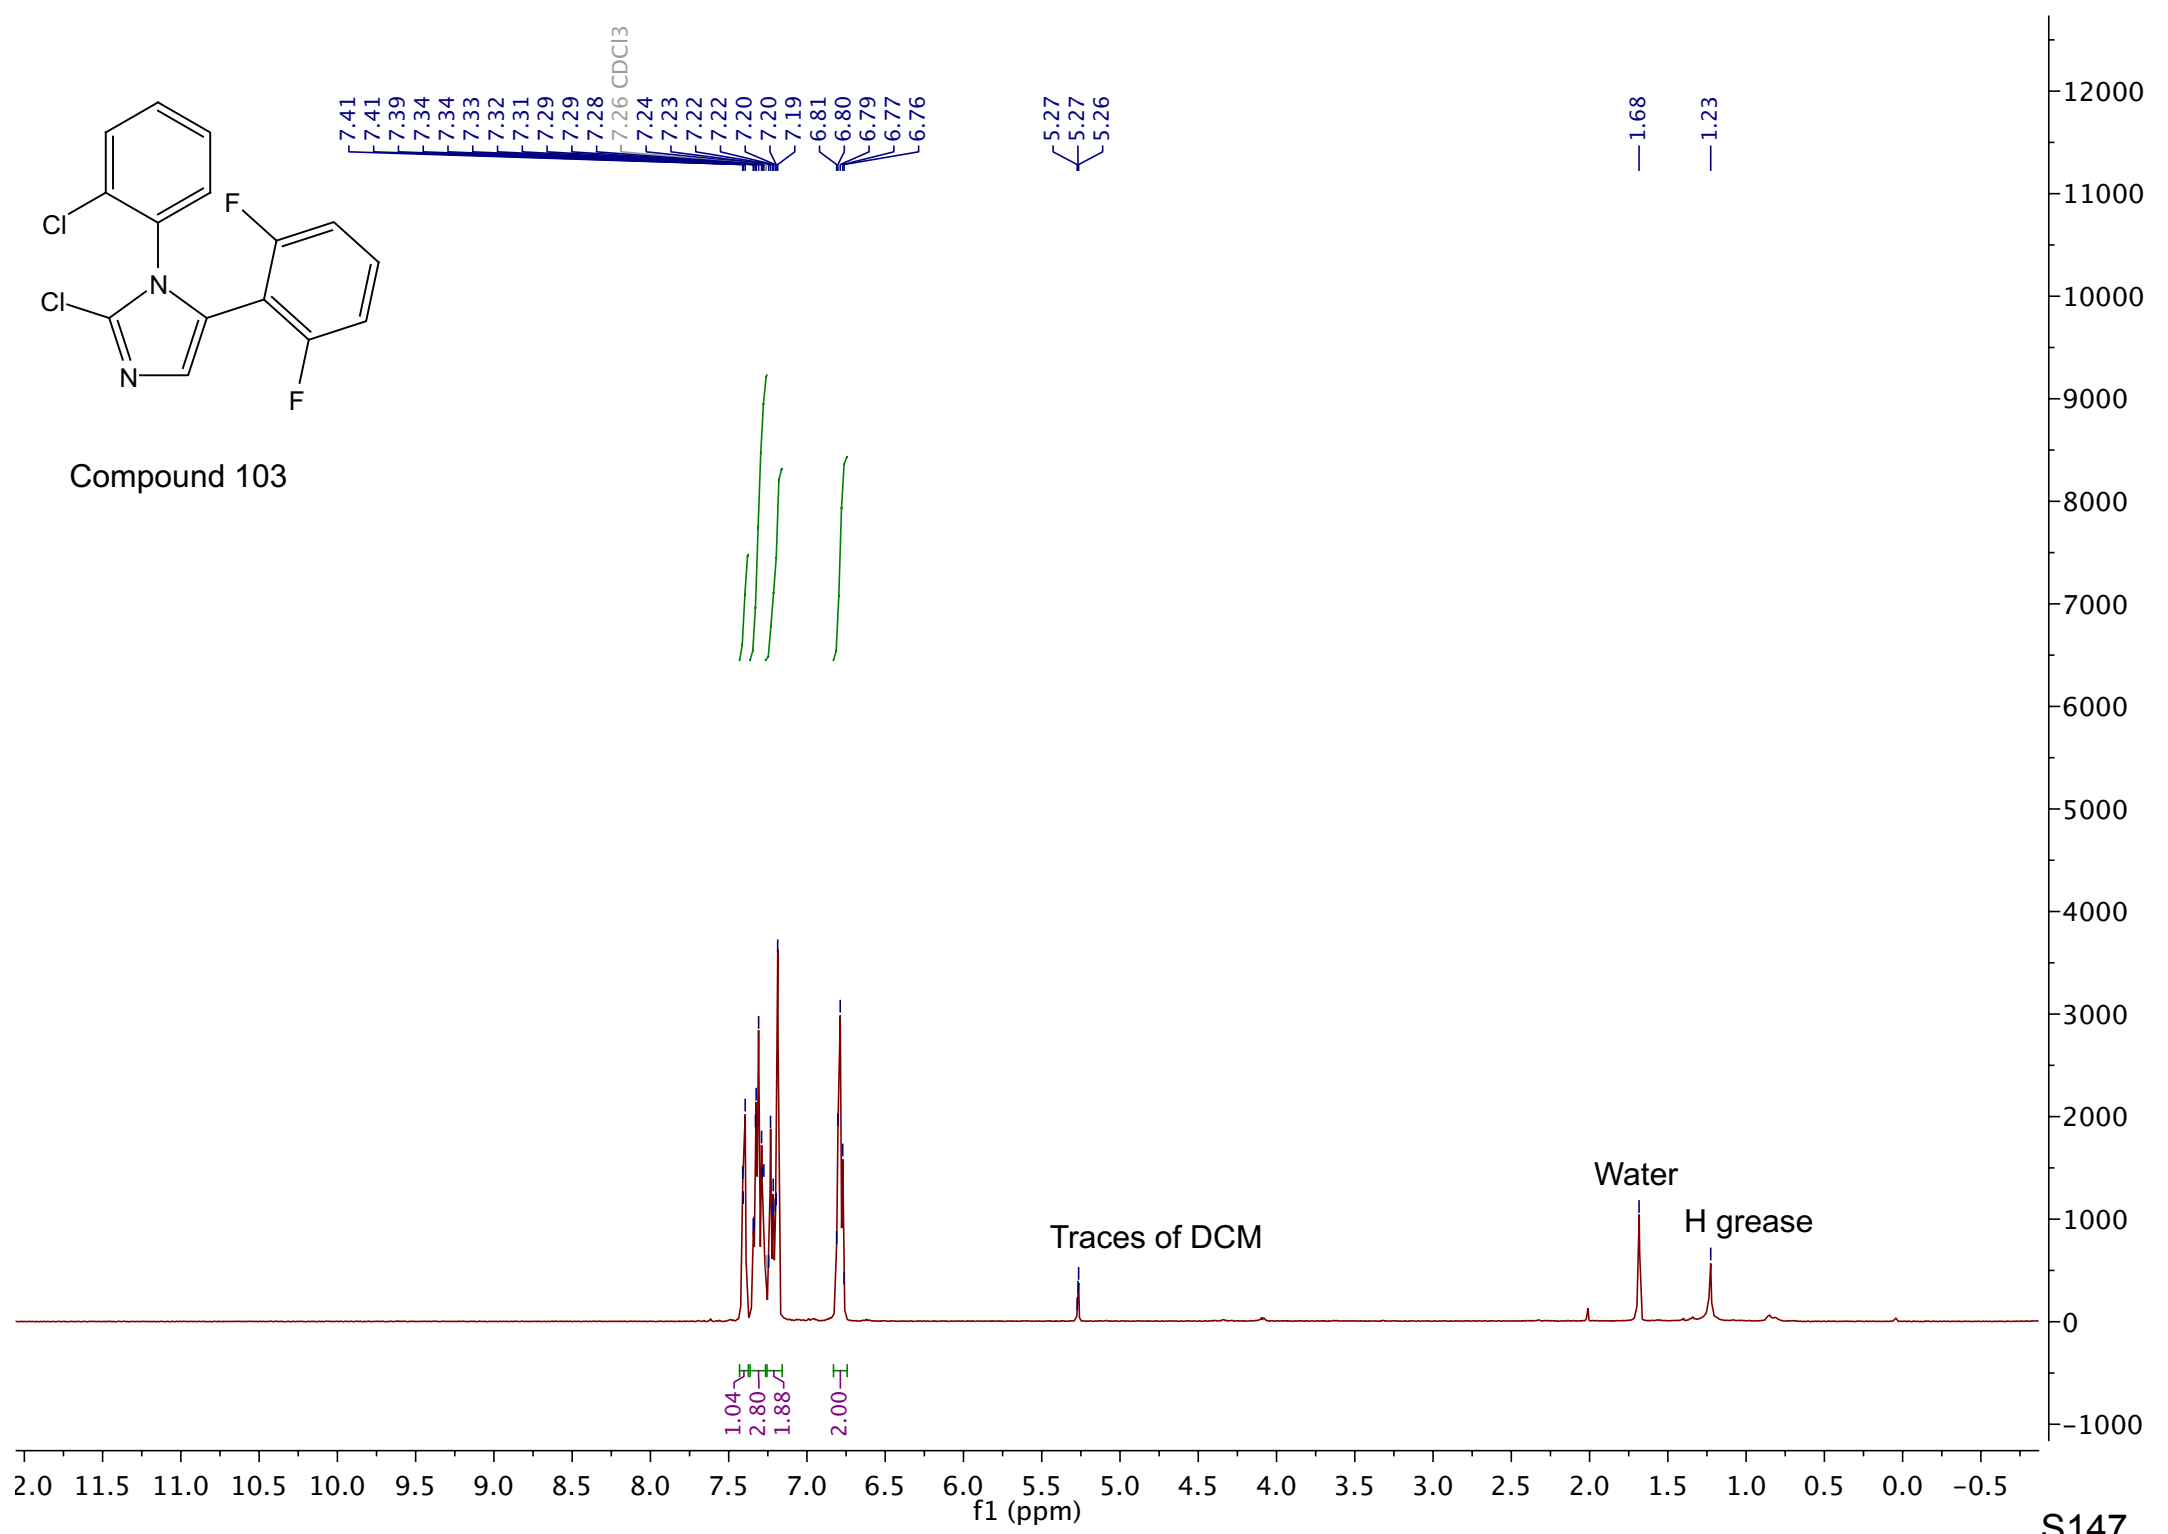

Traces of DCM

Water

H grease

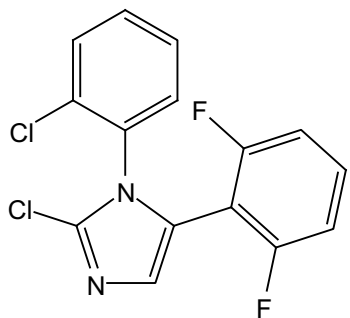

Compound 103

161.74  
161.69  
159.74  
159.69  
134.75  
133.21  
132.81  
131.42  
131.34  
131.26  
131.06  
130.51  
130.44  
130.32  
127.44  
122.84  
111.63  
111.59  
111.47  
111.43  
107.03  
106.87  
106.71

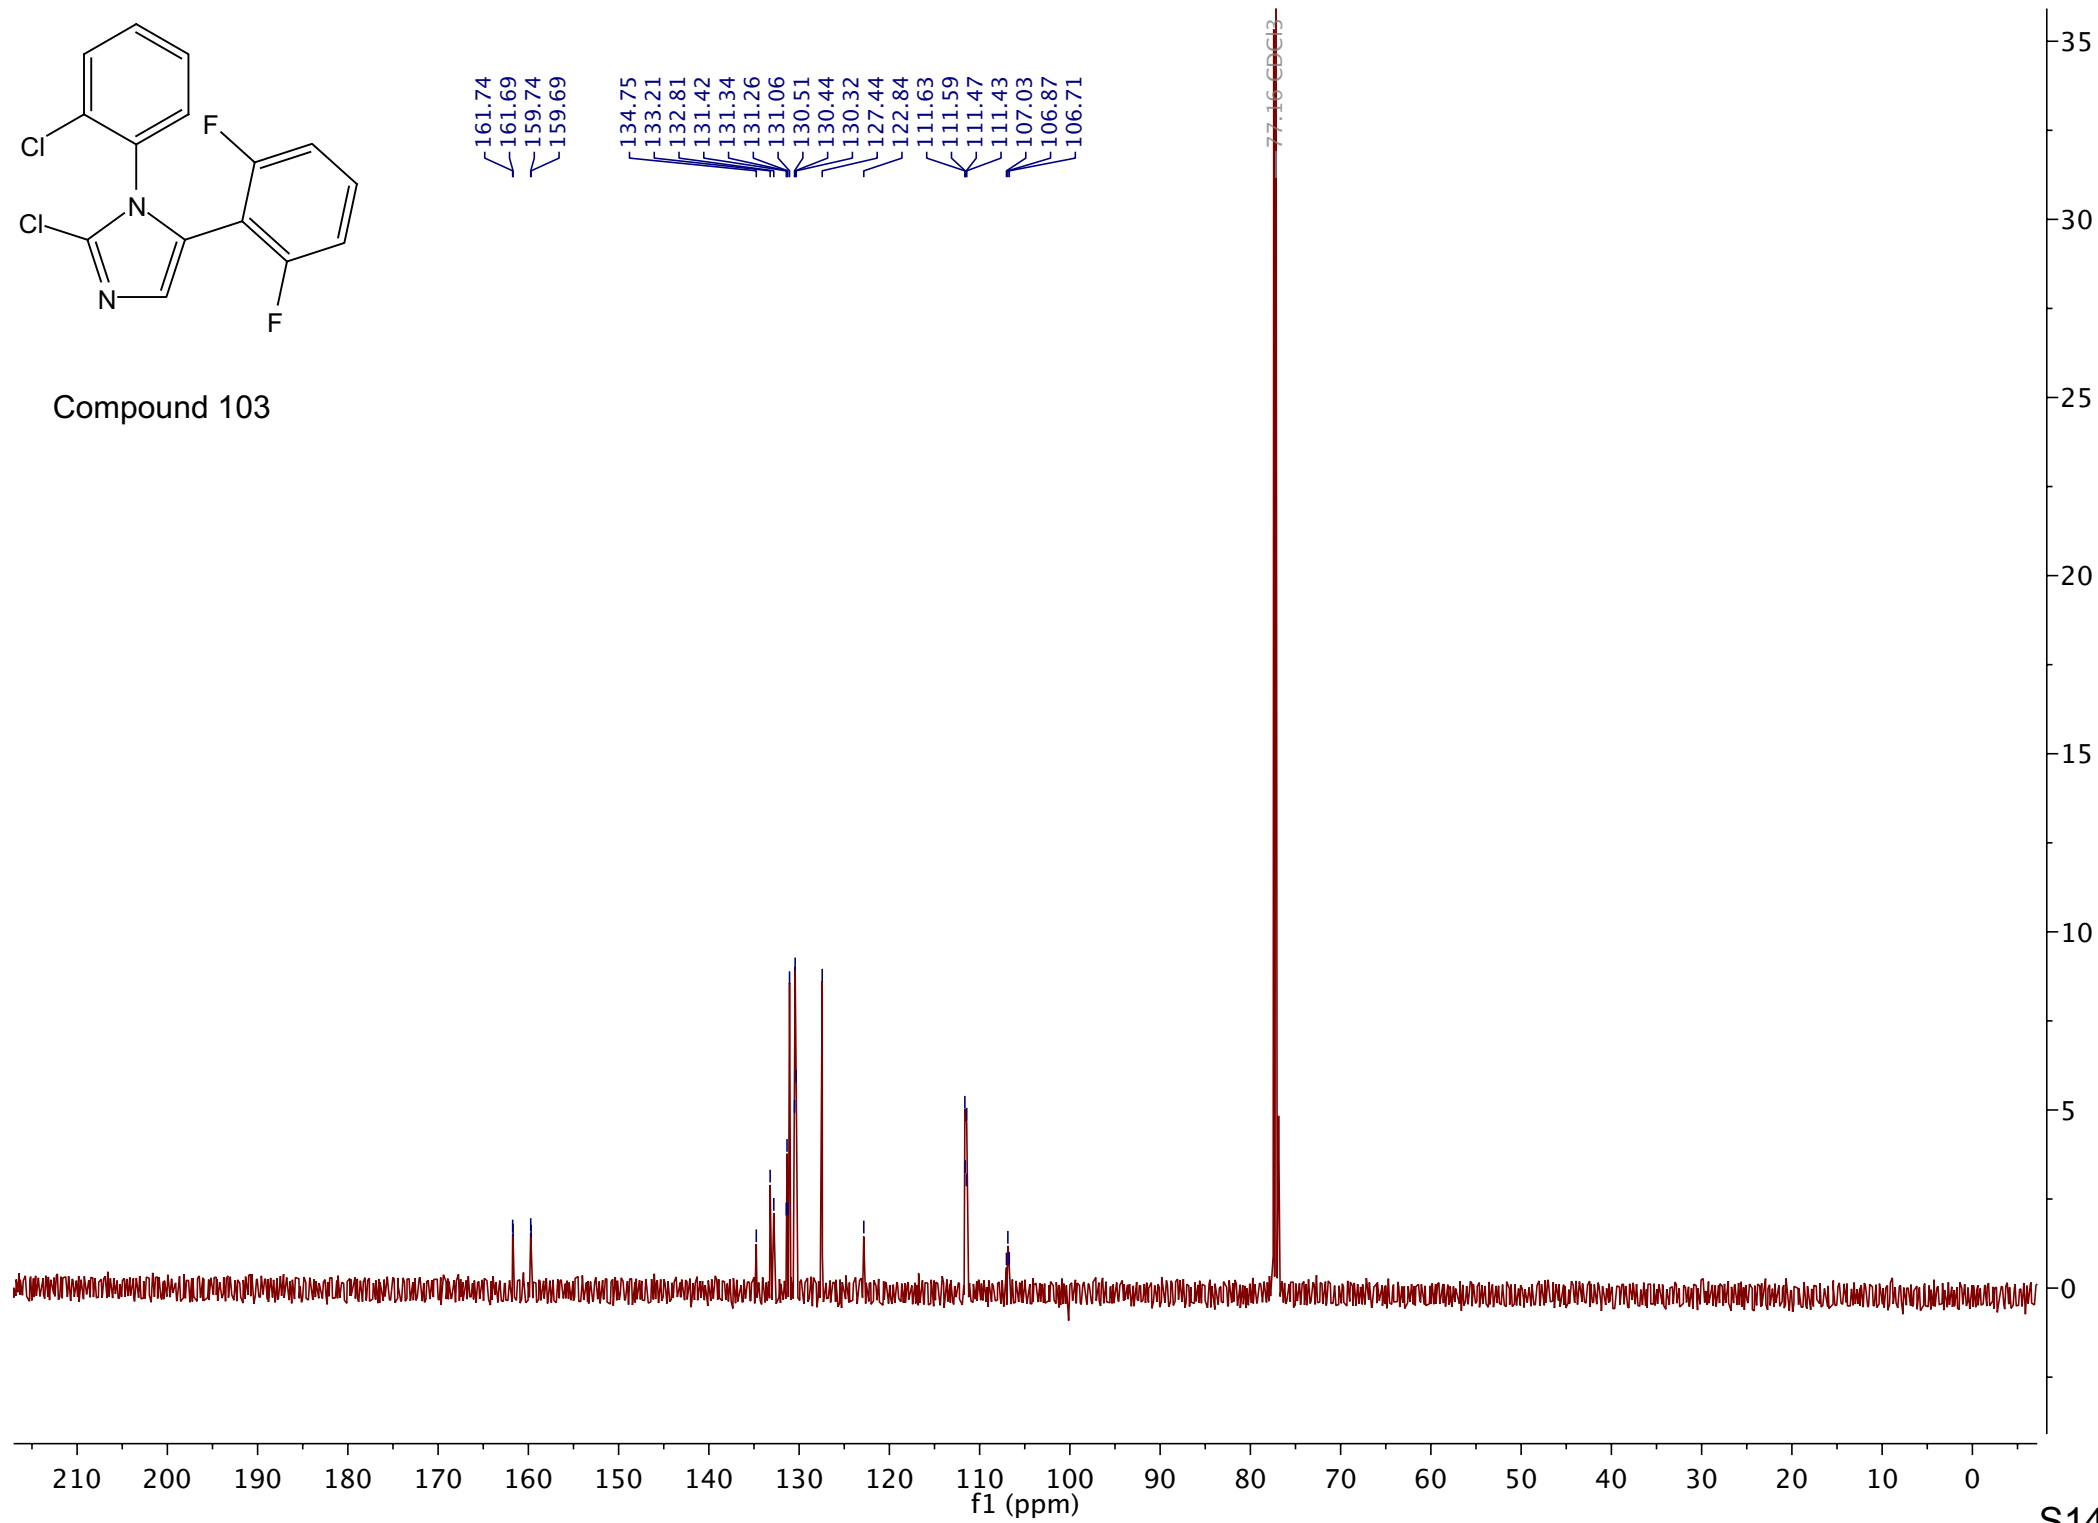

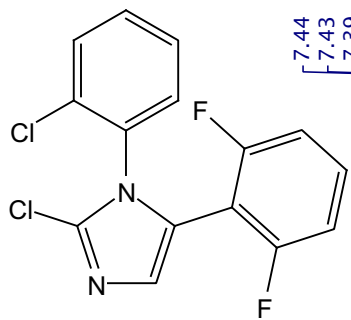

Compound 104

7.44  
7.43  
7.39  
7.39  
7.38  
7.37  
7.36  
7.36  
7.35  
7.34  
7.34  
7.33  
7.33  
7.32  
7.32  
7.31  
7.30  
7.29  
7.28  
7.26 CDCl3  
6.90  
6.88  
6.87  
6.83  
6.82  
6.80

—1.60  
—1.25

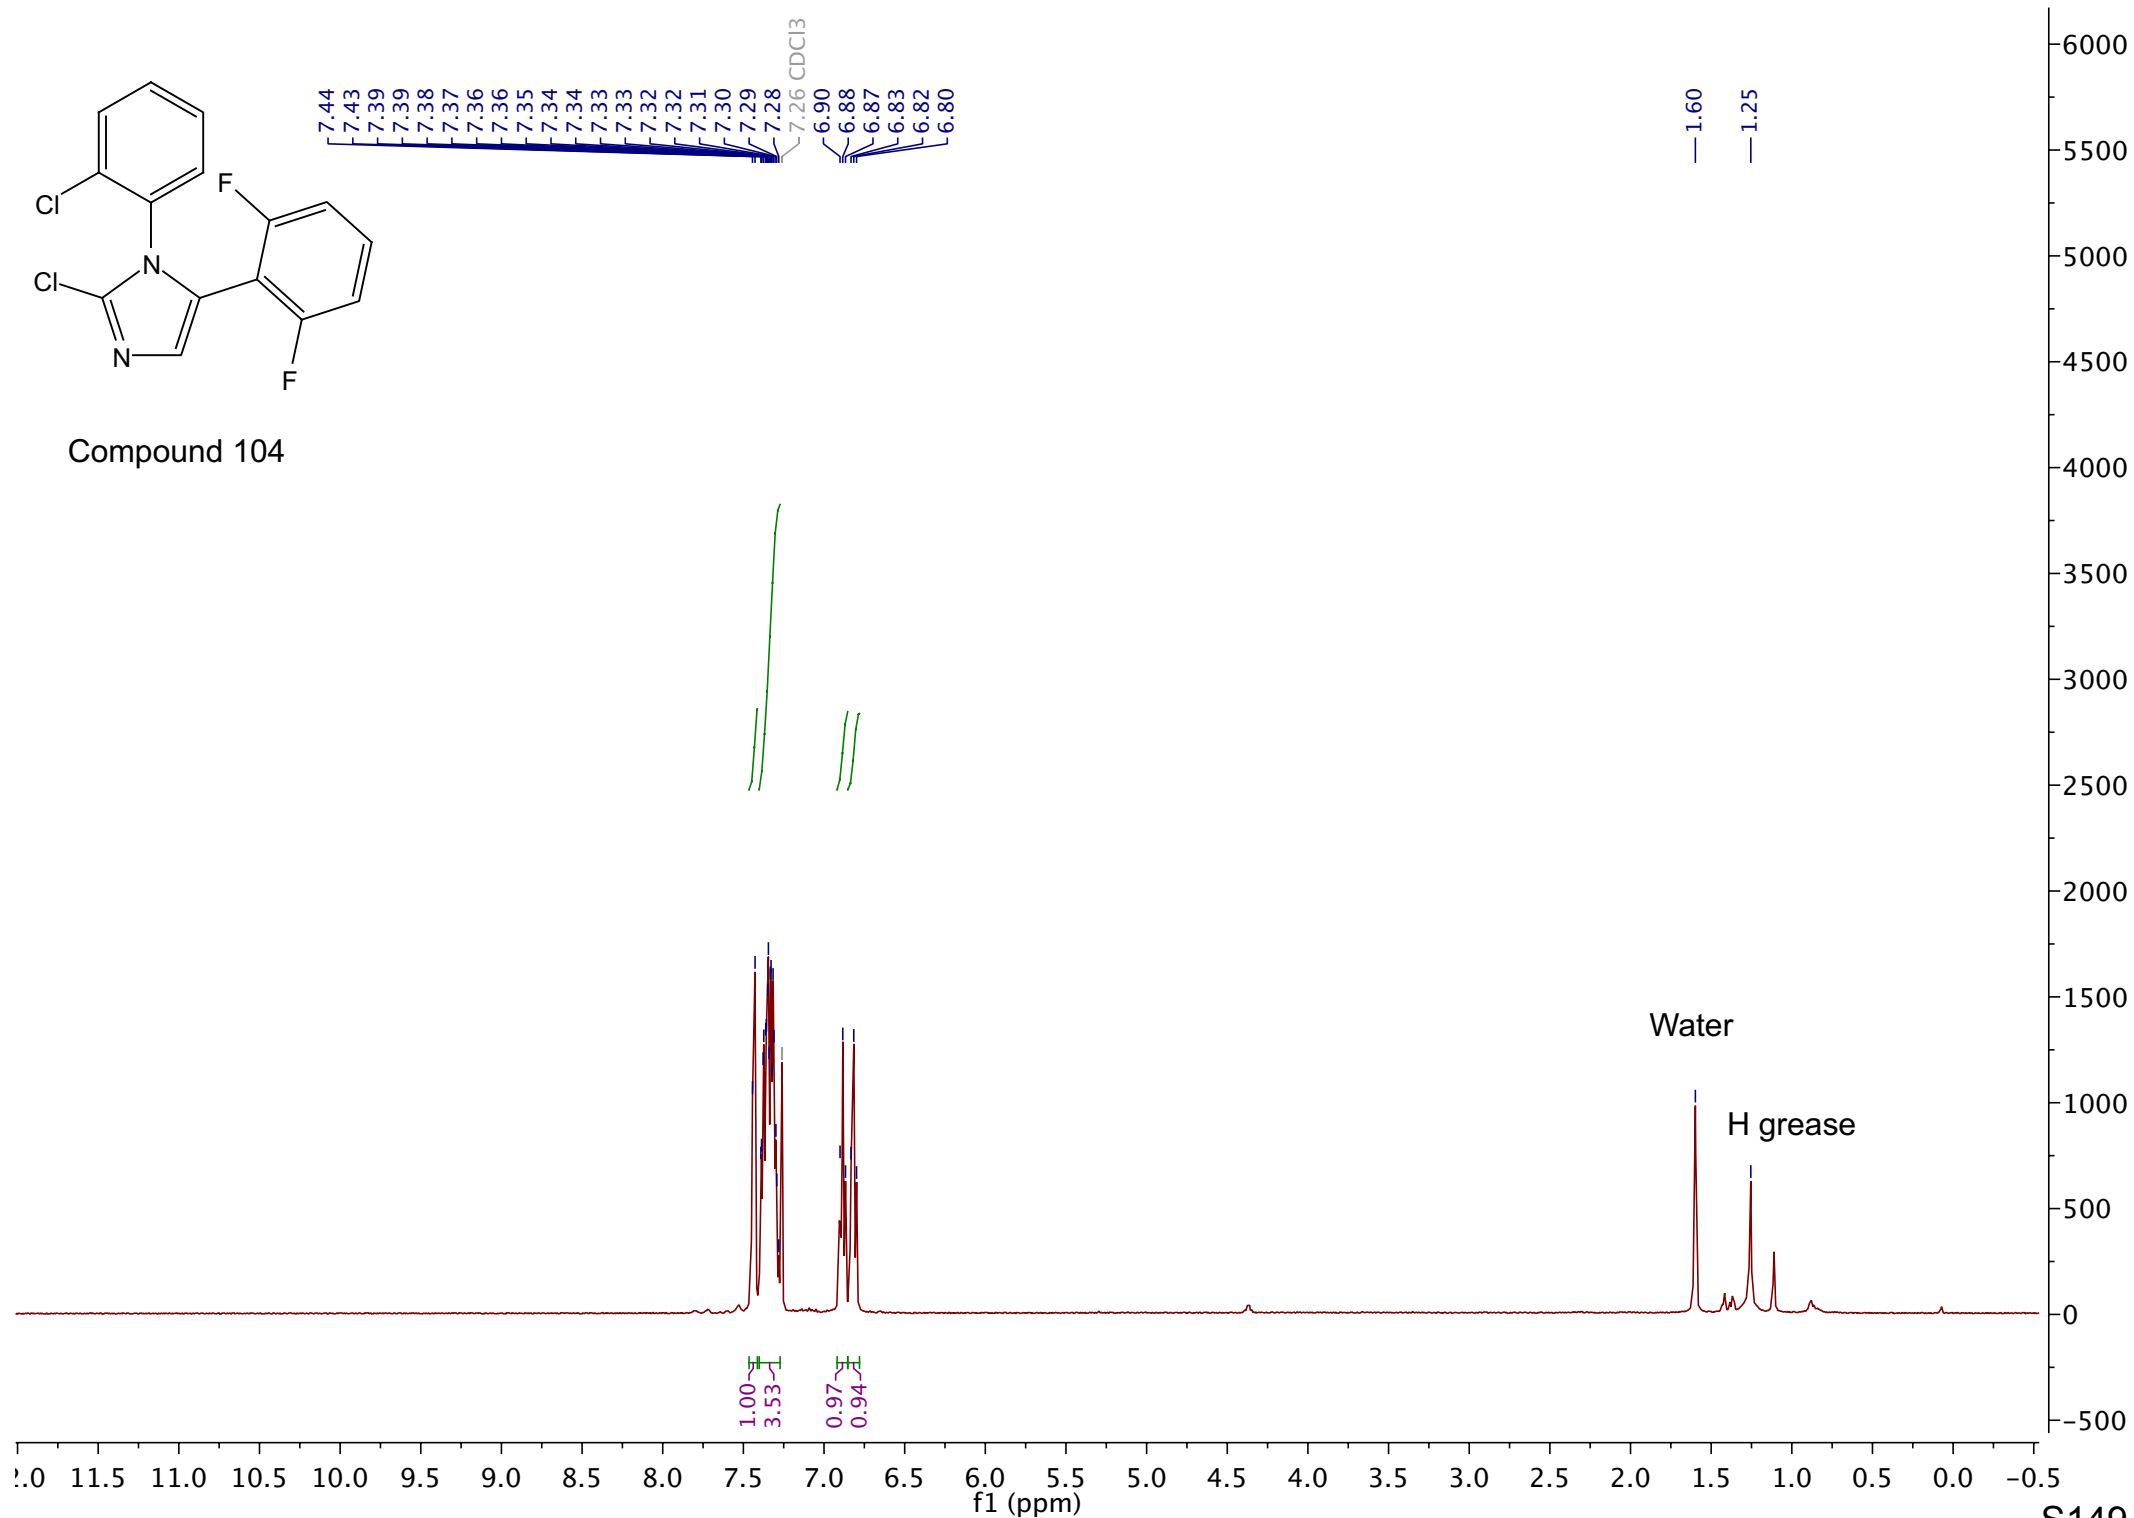

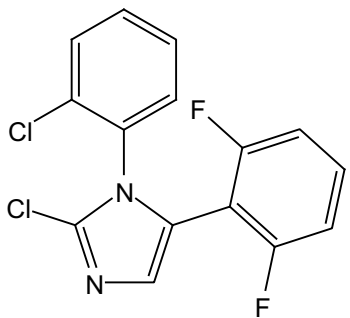

Compound 104

- 162.10
- 162.05
- 160.08
- 160.03
- 133.11
- 133.08
- 132.45
- 132.37
- 132.27
- 131.53
- 130.56
- 130.39
- 130.24
- 130.22
- 127.62
- 118.89
- 112.05
- 112.02
- 111.88
- 111.85
- 111.52
- 111.49
- 111.34
- 111.31
- 105.08
- 104.92
- 104.76

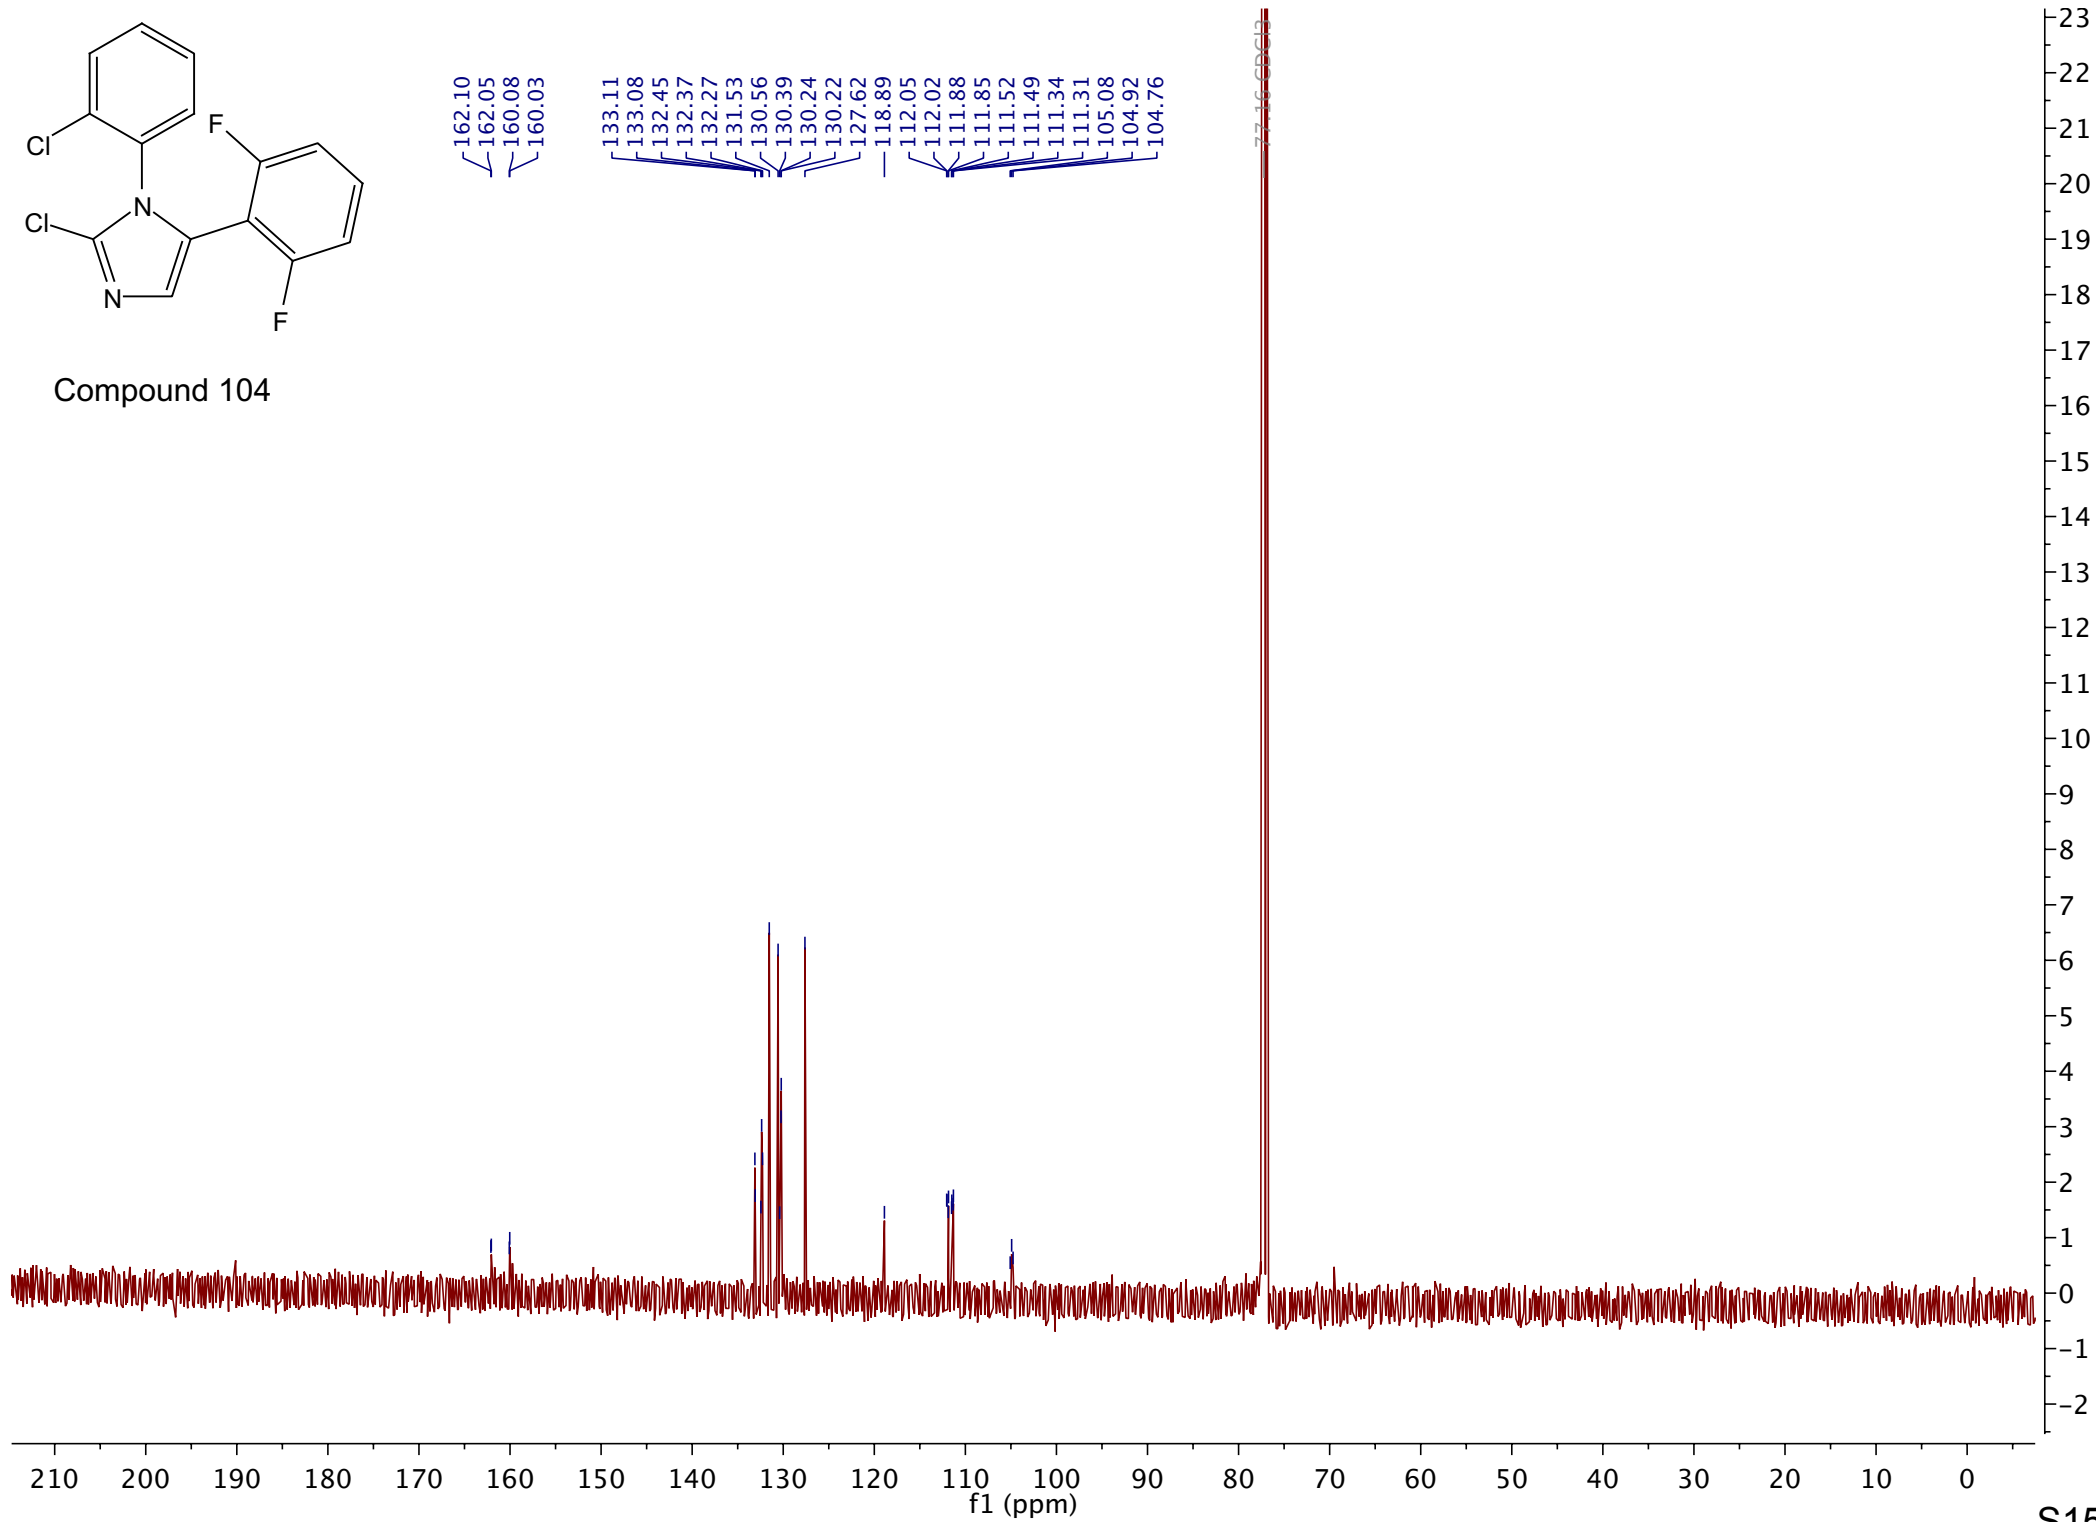

Supplemental Figure 1

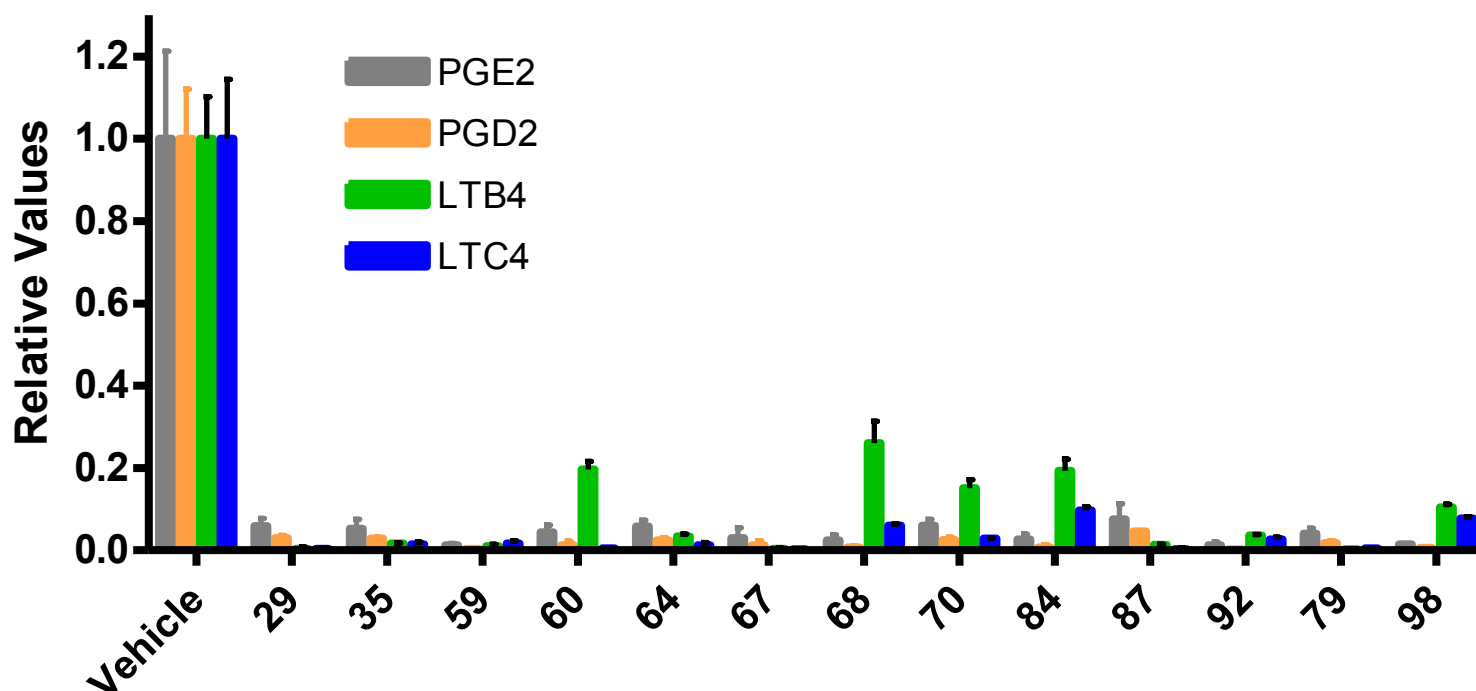

Analysis of Table 2 compounds for their ability to reduce multiple COX and 5-LOX products. The compounds listed in Table 2 were tested at 50  $\mu$ M in the RBL-1 assay, and COX-derived PGE2 and PGD2, as well as 5-LOX-derived LTB4 and LTC4, were assessed by LC-MS/MS. All compounds caused appreciable inhibition of all of the measured eicosanoids.

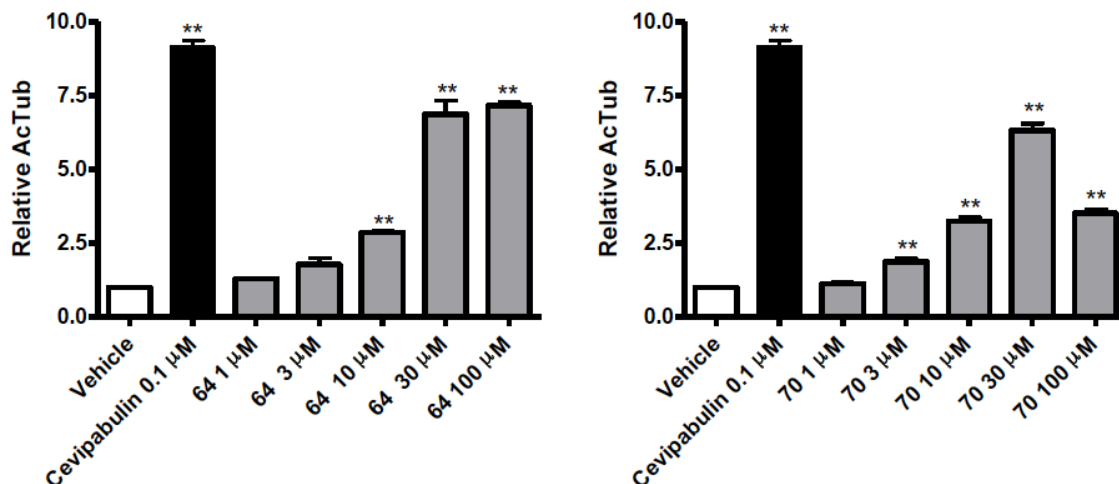

**Supplemental Figure 2. Concentration response of compounds 64 and 70 in the QBI293 AcTub assay.** Compounds **64** and **70** underwent concentration-response testing in triplicate in the QBI cell acetyl tubulin (AcTub) assay from 1-100  $\mu\text{M}$  and the increase in AcTub/ $\mu\text{g}$  of cellular homogenate relative to vehicle-treated cells is graphed. The triazolopyrimidine, cevipabulin,<sup>1</sup> was tested at 0.1  $\mu\text{M}$  as a positive control. Error bars represent standard error of the mean. \*\*,  $p < 0.01$  relative to vehicle-treated cells as determined by one-way ANOVA and Dunnett's multiple comparison test.

Whereas **64** demonstrated a maximal activity that plateaued at 30  $\mu\text{M}$ , a bell-shaped concentration-response was observed at high concentrations with **70**, such that a greater increase of AcTub was seen at 30  $\mu\text{M}$  than 100  $\mu\text{M}$ , as has been observed at lower concentrations for other imidazole and triazolopyrimidine examples (**58**, **71**, **108** in Table 1).

<sup>1</sup> Zhang N, et al. J. Med. Chem. 2007, 50, 319-327.
